# Supplementary material for: Differential DNA Methylation of MicroRNA Genes in Temporal Cortex from Alzheimer’s Disease Individuals
Source: Hindawi journal article supplement (doi:10.1155/2016/2584940), 2016-01-01
Supplement: f1 [file 2584940.f1.pdf]

Supplementary Table 1. Clinical and pathological data of individuals used in gene expression analysis

|                     | Age at death (yrs) | Gender | CDR | Stages of Senile changes |       |    |
|---------------------|--------------------|--------|-----|--------------------------|-------|----|
|                     |                    |        |     | Braak                    | CERAD | LB |
| Controls            |                    |        |     |                          |       |    |
| 1                   | 71                 | F      | 0   | 0                        | 0     | -  |
| 2                   | 79                 | M      | 0   | 1                        | 0     | -  |
| 3                   | 81                 | F      | 0   | 1                        | 0     | -  |
| 4                   | 77                 | M      | 0   | 1                        | A     | -  |
| 5                   | 57                 | M      | 0   | 0                        | 0     | -  |
| 6                   | 65                 | F      | 0   | 0                        | 0     | -  |
| 7                   | 59                 | F      | 0   | 0                        | 0     | -  |
| 8                   | 89                 | M      | 0   | 2                        | 0     | -  |
| 9                   | 82                 | F      | 0   | 0                        | 0     | -  |
| 10                  | 94                 | F      | 0   | 2                        | 0     | -  |
| Alzheimer's disease |                    |        |     |                          |       |    |
| 1                   | 99                 | F      | 3   | 5                        | B     | -  |
| 2                   | 82                 | F      | 2   | 4                        | B     | -  |
| 3                   | 86                 | F      | 1   | 4                        | C     | -  |
| 4                   | 83                 | F      | 3   | 5                        | A     | -  |
| 5                   | 69                 | M      | 2   | 6                        | C     | -  |
| 6                   | 87                 | F      | 3   | 5                        | B     | -  |
| 7                   | 82                 | F      | 2   | 5                        | C     | -  |
| 8                   | 77                 | F      | 3   | 4                        | A     | -  |
| 9                   | 83                 | F      | 3   | 6                        | C     | -  |

Braak stage = neurofibrillary tangle; CERAD (Consortium to Establish a Registry for Alzheimer's Disease) = neuritic plaques; LB=Lewy body; CDR=Clinical Dementia Rate.

| Name       | CHR | Probe_SNPs | Probe_SNPs_10 | UCSC_RefGene_Name                |
|------------|-----|------------|---------------|----------------------------------|
| cg01391297 | 1   |            |               | LOC645676;ASH1L                  |
| cg23676114 | 9   |            |               | SUGT1P1;CHMP5;BAG1               |
| cg23261413 | 11  |            |               | LOC100130987                     |
| cg15700489 | 1   |            |               | RNU11                            |
| cg11005826 | 11  |            |               | IGF2AS;INS-IGF2;IGF2;IGF2AS      |
| cg02587316 | 19  |            |               | ZNF529;ZNF382;ZNF529;ZNF529      |
| cg19768013 | 5   |            |               | C5orf27                          |
| cg15951280 | 5   |            |               | LOC728613                        |
| cg24789143 | 8   | rs10090565 |               | USP17L2;FAM66D                   |
| cg22725460 | 2   |            |               | SH3RF3;LOC100287216              |
| cg12974337 | 10  |            |               | LOC283050;LOC283050;LOC283050    |
| cg03438079 | 16  |            |               | TRAF7;SNORD60                    |
| cg08307039 | 5   |            |               | TRIM23;C5orf44;TRIM23;C5orf44;TF |
| cg13837916 | 6   |            |               | GUSBL1                           |
| cg16696856 | 19  |            |               | LOC113230                        |
| cg02282626 | 6   | rs9391806  |               | HLA-L                            |
| cg05446860 | 20  |            |               | LOC284798;LOC284798;LOC284798    |
| cg16503683 | 11  | rs59856964 |               | ZFP91;LPXN;ZFP91-CNTF            |
| cg10098541 | 3   |            |               | PDIA5;PDIA5                      |
| cg06241765 | 8   |            |               | INTS9;INTS9;HMBOX1;HMBOX1;INT    |
| cg11538417 | 6   |            | rs34548063    | DOM3Z;STK19;DOM3Z;STK19;STK19    |
| cg02526277 | 11  |            |               | LOC494141;LOC494141;LOC494141    |
| cg01399860 | 9   | rs71505264 |               | NCRNA00094                       |
| cg27020253 | 6   |            | rs80160561    | HLA-L                            |
| cg14981132 | 12  |            |               | HNRNPA1;HNRPA1L-2;HNRNPA1        |
| cg22772418 | 7   |            |               | HOXA11AS                         |
| cg12901283 | 17  |            |               | COX11;COX11;COX11;COX11;COX11    |
| cg27367045 | 16  |            |               | MGC3771;MGC3771;ZNF205;ZNF20     |
| cg24895779 | 19  |            | rs62106093    | UCA1                             |
| cg25358410 | 9   |            |               | IARS;IARS;SNORA84;IARS           |
| cg12605341 | 20  |            |               | LOC388789                        |
| cg19376858 | 6   |            |               | TNXB;TNXB;TNXA;STK19;STK19       |
| cg13881327 | 3   | rs2290311  |               | RPL32;SNORA7A;RPL32;RPL32;RPL3   |
| cg02613624 | 11  | rs14367    |               | INS-IGF2;IGF2;IGF2;IGF2          |
| cg12432898 | 17  |            |               | FLJ35220;LOC100294362;FLJ35220;f |
| cg04582861 | 17  |            |               | BRCA1;BRCA1;BRCA1;BRCA1;BRCA1    |
| cg18801245 | 12  |            |               | LARP4;LARP4;LARP4;LARP4;LARP4;L  |
| cg07147033 | 1   |            |               | MIB2;MIB2;MIB2;MIB2;MIB2         |
| cg02213716 | 13  |            |               | UBAC2;UBAC2;UBAC2;UBAC2          |
| cg15742049 | 10  |            |               | NCRNA00081;NCRNA00081;SHOC2;     |
| cg06809295 | 11  | rs2283194  |               | KCNQ1OT1;KCNQ1;KCNQ1             |
| cg12636325 | 17  |            |               | RNF126P1                         |
| cg09677763 | 11  | rs78285343 |               | NUP98;PGAP2;NUP98;PGAP2;PGAP?    |

|            |               |                                   |
|------------|---------------|-----------------------------------|
| cg23358625 | 19            | RPSAP58                           |
| cg07074757 | 2             | CLASP1;CLASP1;CLASP1;RNU4ATAC     |
| cg00378218 | 17            | SCARF1;SCARF1;SCARF1;SCARF1;SC    |
| cg13947830 | 1             | MIB2;MIB2;MIB2;MIB2;MIB2;MIB2     |
| cg13685329 | 2             | CCT7;CCT7;CCT7;CCT7;C2orf7;CCT7;  |
| cg11717189 | 11            | INS-IGF2;IGF2;IGF2;IGF2           |
| cg03940153 | 2 rs72223545  | SMPD4;SMPD4;SMPD4;SMPD4;SMP       |
| cg17455183 | 1             | GORAB;GORAB;GORAB                 |
| cg07439409 | 6             | MIR548H3;C6orf167                 |
| cg23010048 | 19 rs75075099 | ZNF577;ZNF577;ZNF577              |
| cg01101865 | 14            | FLJ43390                          |
| cg27032957 | 6             | HCG27                             |
| cg10146807 | 11            | API5;API5;API5;API5               |
| cg20503416 | 11            | MALAT1                            |
| cg13556639 | 2             | NEURL3                            |
| cg19031271 | 17            | LOC100306951;INPP5K;INPP5K;INPF   |
| cg16560453 | 3             | ZBTB11;LOC100009676               |
| cg27169539 | 14            | RAB2B;RAB2B;TOX4;RAB2B;RAB2B      |
| cg00485047 | 16            | NDE1;MIR484;KIAA0430              |
| cg08127941 | 6             | TRIM39;HCG18;HCG18;TRIM39         |
| cg11935027 | 4             | SNHG8;SNORA24                     |
| cg02670096 | 5 rs79066055  | LOC100268168;RPL26L1;LOC100268    |
| cg04283751 | 10            | C10orf41;ZNF503;C10orf41          |
| cg16698201 | 6             | SNORD50B;SNHG5;SNORD50A           |
| cg21793016 | 6 rs3757333   | ZNRD1;ZNRD1;NCRNA00171            |
| cg02595819 | 19            | ZNF547;TRAPPC2P1                  |
| cg19548283 | 14            | FLJ31306;FLJ31306;ARID4A;ARID4A;  |
| cg01640215 | 16 rs226058   | CRYM;NCRNA00169                   |
| cg09545860 | 5             | SAP30L;SAP30L;SAP30L;SAP30L       |
| cg22012577 | 6             | HLA-J;NCRNA00171                  |
| cg15066416 | 17            | LOC100272146;C17orf57             |
| cg01590439 | 8             | NCRNA00051                        |
| cg20488697 | 17            | LOC92659;MAFG                     |
| cg21751540 | 19 rs2914637  | ZNF738                            |
| cg00301159 | 3             | C3orf55;C3orf55;C3orf55;C3orf55   |
| cg14025299 | 15            | SPATA5L1;SPATA5L1                 |
| cg25828462 | 15            | LOC283731;ISLR2;ISLR2;ISLR2;ISLR2 |
| cg25233816 | 3 rs61735736  | LOC344595;LOC344595;LOC100302     |
| cg16615348 | 5             | VTRNA1-1                          |
| cg10605084 | 12            | LOC144571                         |
| cg21782985 | 1             | C1orf203;C1orf203;C1orf203;C1orf2 |
| cg21271452 | 8             | CHRAC1;CHRAC1                     |
| cg14833160 | 19            | BAX;BAX;BAX;BAX;BAX               |
| cg06808983 | 17            | G6PC3;G6PC3;G6PC3;G6PC3           |

|            |    |                     |                                |
|------------|----|---------------------|--------------------------------|
| cg10621825 | 6  |                     | STL                            |
| cg01683044 | 12 |                     | HOXC4;HOXC6;HOXC5              |
| cg05038466 | 2  |                     | TTC31;TTC31;CCDC142            |
| cg03364381 | 21 |                     | NCRNA00111                     |
| cg02204046 | 2  |                     | MYCN;MYCN;MYCNOS               |
| cg15855184 | 11 |                     | DKFZp779M0652                  |
| cg03402794 | 13 |                     | RPL21;RPL21P28                 |
| cg12634276 | 4  |                     | SNORA26;KIAA0114               |
| cg17338969 | 7  | rs3991551           | PILRB;PMS2L1;PILRB             |
| cg00559939 | 2  | rs76690140          | RAPGEF4;LOC91149               |
| cg00187380 | 12 |                     | HOXC4;HOXC5;HOXC5              |
| cg03041602 | 8  | rs6984839           | HAS2AS;HAS2                    |
| cg01811561 | 16 |                     | GFOD2;GFOD2;GFOD2              |
| cg17512353 | 6  |                     | HLA-L                          |
| cg23246703 | 2  |                     | FLJ32063                       |
| cg01656770 | 3  | rs3749386           | LOC100128640;ACVR2B            |
| cg27565645 | 19 |                     | BAX;BAX;BAX;BAX;BAX            |
| cg18155032 | 2  |                     | TRIB2;TRIB2;TRIB2              |
| cg07608496 | 21 |                     | MCM3APAS;LSS;LSS;LSS;LSS       |
| cg10866755 | 2  |                     | ZNF385B;MIR1258                |
| cg18433293 | 15 |                     | LOC729082                      |
| cg16127286 | 4  | rs7678308 rs1573955 | SNHG8;SNORA24                  |
| cg05411953 | 19 |                     | NCRNA00085                     |
| cg04539241 | 17 |                     | SNORA76                        |
| cg20727290 | 15 | rs74895554          | BBS4;HIGD2B                    |
| cg20431766 | 2  |                     | MYCN;MYCNOS                    |
| cg00891649 | 17 |                     | MAPT;MAPT;LOC100130148;LOC100  |
| cg24895178 | 17 |                     | HS3ST3B1;MGC12916              |
| cg12148979 | 2  |                     | FAM128A;LOC150776              |
| cg14915787 | 3  | rs61740275          | LOC344595;LOC344595;LOC100302  |
| cg09043226 | 6  |                     | AGPAT1;RNF5;RNF5P1             |
| cg01931958 | 12 | rs61742296          | ERC1;ERC1;ERC1;ERC1;ERC1       |
| cg08097631 | 14 | rs61980703          | C14orf48;C14orf48;C14orf48     |
| cg04114368 | 1  |                     | BRP44;DCAF6;BRP44;BRP44;DCAF6  |
| cg03163767 | 16 |                     | FAM96B;CES2;FAM96B;CES2        |
| cg25102782 | 2  |                     | PRKRA;DFNB59;PRKRA;PRKRA;MIR5  |
| cg26181880 | 10 |                     | MARVELD1;MARVELD1              |
| cg11760602 | 12 |                     | LOC374443                      |
| cg10061567 | 6  | rs17194824          | TRIM39;HCG18;HCG18             |
| cg23731991 | 7  |                     | FLJ43663;MKLN1                 |
| cg15226501 | 16 |                     | CHTF8;CHTF8;CHTF8;CHTF8;CIRH1A |
| cg17361803 | 10 |                     | C10orf41;C10orf41              |
| cg11773816 | 4  |                     | LOC285548                      |
| cg15741124 | 17 |                     | CYB5D2;CYB5D2;CYB5D2           |

|            |    |            |                                  |
|------------|----|------------|----------------------------------|
| cg00580022 | 22 |            | CECR4;CECR5;CECR5;CECR4          |
| cg17051733 | 3  |            | SOX2OT;SOX2                      |
| cg14460816 | 14 |            | FLJ31306;ARID4A;FLJ31306;ARID4A; |
| cg08198480 | 5  |            | LOC285696                        |
| cg10641615 | 12 |            | HOTAIR                           |
| cg08598296 | 10 |            | RHOBTB1;RHOBTB1;RHOBTB1;RHOBTB1  |
| cg06636001 | 8  | rs12676034 | FLJ10661;FLJ10661;FLJ10661       |
| cg11844660 | 13 |            | UBAC2;UBAC2;UBAC2                |
| cg12336877 | 9  |            | LOC100289341;MAN1B1              |
| cg07203320 | 3  | rs78321136 | COPB2;COPB2                      |
| cg04739460 | 19 | rs78042922 | ZNF415;ZNF415;ZNF415;ZNF415      |
| cg08365618 | 3  |            | OXSM;NGLY1;OXSM;OXSM             |
| cg04918358 | 2  | rs56913233 | LMAN2L;LMAN2L;LMAN2L;LMAN2L;     |
| cg18755204 | 10 |            | FAM45B;FAM45A                    |
| cg13844899 | 7  |            | EFCAB10                          |
| cg16981259 | 6  |            | BAT1;SNORD84;BAT1                |
| cg04474007 | 19 | rs76526663 | NCRNA00085                       |
| cg13524302 | 6  |            | HLA-DPB2                         |
| cg18296956 | 5  |            | VTRNA1-1                         |
| cg02275292 | 7  |            | CCM2;CCM2;CCM2;CCM2              |
| cg10501065 | 11 |            | IGF2AS;INS-IGF2;IGF2;IGF2AS      |
| cg26397662 | 15 | rs17115340 | SNORD115-14                      |
| cg23478098 | 5  |            | LOC645323;LOC645323              |
| cg12587382 | 1  |            | FAM54B;FAM54B;FAM54B;LOC6464     |
| cg02891153 | 7  |            | LOC100128822                     |
| cg08887961 | 10 |            | RHOBTB1;RHOBTB1                  |
| cg20680460 | 1  | rs74849649 | BRP44;BRP44;DCAF6;BRP44;DCAF6    |
| cg13795840 | 19 |            | CIRBP;CIRBP;C19orf24             |
| cg04621664 | 6  |            | C6orf48;C6orf48;C6orf48;SNORD48; |
| cg15737319 | 2  |            | MTHFD2;MTHFD2;MTHFD2             |
| cg11496747 | 3  |            | PDIA5;PDIA5                      |
| cg10319512 | 2  |            | ZEB2;ZEB2;ZEB2                   |
| cg06868473 | 12 | rs7301155  | SHMT2;SHMT2;SHMT2;SHMT2;SHM      |
| cg20560141 | 12 |            | LOC338758                        |
| cg22358797 | 18 |            | MBD2;SNORA37;MBD2                |
| cg18470891 | 12 |            | FOXM1;C12orf32;C12orf32;FOXM1;   |
| cg21910709 | 5  | rs72703166 | BRD9;BRD9;BRD9;TRIP13;TRIP13     |
| cg14752069 | 8  |            | FAM66D                           |
| cg00449210 | 7  |            | CBLL1;CBLL1                      |
| cg04891959 | 17 |            | SHBG;SHBG;SAT2                   |
| cg17665927 | 11 | rs78341923 | INS-IGF2;INS-IGF2;IGF2;IGF2      |
| cg12616721 | 3  |            | LOC100128640;ACVR2B              |
| cg04079206 | 9  |            | LOC340508                        |
| cg16767968 | 17 |            | SCARNA16;C17orf86                |

|            |    |            |                                    |
|------------|----|------------|------------------------------------|
| cg04580897 | 3  | rs3772142  | SNORA6;RPSA;RPSA                   |
| cg01101058 | 14 |            | SFRS5;SFRS5;LOC100289511           |
| cg26071823 | 14 |            | DCAF11;DCAF11;DCAF11;DCAF11;DI     |
| cg13304297 | 3  |            | C3orf50                            |
| cg04134452 | 16 | rs17135720 | SNHG9;SNORA78;RPS2                 |
| cg12825059 | 10 |            | SEC61A2;SEC61A2;SEC61A2;SEC61A     |
| cg08880423 | 12 |            | NCRNA00173;NCRNA00173              |
| cg09178844 | 1  |            | BTF3L4;BTF3L4;TXNDC12;BTF3L4       |
| cg15662822 | 6  |            | BTN2A3                             |
| cg02352653 | 5  |            | SMAD5;SMAD5;SMAD5;SMAD5OS          |
| cg12362060 | 15 |            | LOC729082                          |
| cg19974448 | 10 |            | LOC100169752                       |
| cg06503216 | 16 |            | ATXN1L;ATXN1L                      |
| cg23628968 | 1  |            | SPEN;FLJ37453                      |
| cg07022885 | 11 |            | KIAA0652;KIAA0652;KIAA0652;HARE    |
| cg24401870 | 13 |            | KLHL1;KLHL1;ATXN8OS                |
| cg07203134 | 3  |            | TNIK;TNIK;TNIK;TNIK;TNIK;TNIK;TNIK |
| cg25896734 | 7  |            | EFCAB10                            |
| cg15842967 | 11 |            | KDM2A;KDM2A                        |
| cg15846718 | 6  |            | COX7A2;COX7A2                      |
| cg14629287 | 6  |            | LOC285830;LOC285830                |
| cg14820798 | 7  |            | ZNF767;ZNF767                      |
| cg00704554 | 11 |            | LOC100128239                       |
| cg04080595 | 1  |            | PRDM16;FLJ42875;PRDM16;FLJ4287     |
| cg06254556 | 20 | rs1203897  | C20orf56                           |
| cg20095680 | 19 |            | BAX;BAX;BAX;BAX;BAX                |
| cg27294431 | 1  |            | TPR;C1orf27;MIR548F1;C1orf27;C1c   |
| cg00577578 | 1  | rs75003897 | GBAP1                              |
| cg08596028 | 7  |            | SSBP1;FLJ40852                     |
| cg25349370 | 5  |            | FGF1;FGF1;FGF1;FGF1;FGF1;FGF1      |
| cg12426141 | 15 |            | TCF12;TCF12;LOC145783;TCF12;TCF    |
| cg14594481 | 12 |            | MLF2;MLF2                          |
| cg18403792 | 5  |            | LOC645323;LOC645323;LOC645323      |
| cg15950337 | 11 | rs77980976 | KIAA0652;KIAA0652;KIAA0652;KIAA    |
| cg25326570 | 20 |            | GNAS;GNAS;GNAS;GNASAS              |
| cg05550612 | 16 |            | GLG1;GLG1;GLG1;GLG1;GLG1           |
| cg11119235 | 7  |            | ST7;ST7;ST7OT4;ST7OT1;ST7;ST7      |
| cg00735843 | 14 |            | MUDENG;MUDENG;EXOC5;MUDEN          |
| cg01363734 | 12 |            | TESC;TESC;TESC                     |
| cg25000382 | 16 |            | LOC652276                          |
| cg03655940 | 16 |            | MIR484;NDE1;NDE1;KIAA0430          |
| cg04561804 | 3  |            | LOC100128164;SEC62;LOC10012816     |
| cg27026909 | 14 |            | FLJ31306;FLJ31306;ARID4A;ARID4A;   |
| cg10336144 | 1  |            | NFYC;NFYC;NFYC;LOC100130557;NF     |

|            |    |            |                                    |
|------------|----|------------|------------------------------------|
| cg02599225 | 10 |            | LOC219347;C10orf57;LOC219347;LC    |
| cg09039689 | 11 |            | KIAA0652;KIAA0652;KIAA0652;HARE    |
| cg09694722 | 11 |            | INS-IGF2;IGF2AS;IGF2;IGF2;IGF2AS;I |
| cg20196910 | 2  |            | DCAF17;METTL8;METTL8;DCAF17;D      |
| cg16298927 | 6  |            | C6orf122;C6orf208                  |
| cg13167753 | 1  | rs34437895 | SYT14;SYT14;SYT14;SYT14;SYT14;SY   |
| cg01872779 | 4  |            | MFSD10;C4orf10;MFSD10              |
| cg01187997 | 11 |            | HCCA2;LOC338651                    |
| cg12364131 | 15 |            | LOC254559                          |
| cg05777976 | 11 | rs17881164 | IGF2AS;INS-IGF2;IGF2;IGF2;IGF2AS   |
| cg19356389 | 6  |            | RING1;MIR219-1                     |
| cg12452106 | 3  |            | C3orf49                            |
| cg07523753 | 1  |            | FLJ42875                           |
| cg14526843 | 3  |            | KPNA1;KPNA1                        |
| cg15131784 | 3  | rs11706576 | COPB2;COPB2                        |
| cg27578974 | 19 | rs74924657 | LOC284441                          |
| cg19440484 | 8  |            | C8orf83                            |
| cg13915892 | 2  |            | LMAN2L;LMAN2L;LMAN2L;LMAN2L;       |
| cg01522721 | 19 |            | MIR1181;CDC37                      |
| cg01134309 | 16 | rs55973164 | ACSF3;ACSF3;ACSF3                  |
| cg26781726 | 12 | rs11043201 | LOC338799                          |
| cg10531748 | 10 |            | LOC100128292;DLG5                  |
| cg25428451 | 1  |            | LOC339524;LOC339524;LOC339524;     |
| cg19463885 | 2  |            | DTYMK;DTYMK;DTYMK                  |
| cg09452728 | 11 |            | LOC100128239                       |
| cg16085042 | 12 |            | LOC253724;HSP90B1                  |
| cg21789280 | 1  |            | HSPC157;HSPC157                    |
| cg10650127 | 11 |            | IGF2;INS-IGF2;INS-IGF2             |
| cg14134703 | 5  |            | BRD9;BRD9;BRD9                     |
| cg26793905 | 1  |            | RNU11                              |
| cg08215532 | 7  |            | DPY19L2P4                          |
| cg03250742 | 4  | rs922697   | SPON2;LOC100130872-SPON2;SPON      |
| cg00671225 | 6  | rs15479    | RPS12;SNORA33                      |
| cg19256675 | 7  |            | PMS2L2;STAG3L1;STAG3L1             |
| cg19342782 | 1  |            | HHLA3;ANKRD13C;HHLA3;HHLA3;HI      |
| cg26561998 | 4  |            | LOC729338;BBS12                    |
| cg15559584 | 6  | rs1059288  | TAPBP;TAPBP;RGL2;RGL2              |
| cg06193393 | 7  | rs3735244  | GATS;GATS;GATS;GATS                |
| cg09763180 | 10 |            | MIR202                             |
| cg26366417 | 3  |            | SDHAP2                             |
| cg08892370 | 1  |            | MGC12982                           |
| cg26979056 | 22 |            | UBE2L3;UBE2L3;UBE2L3               |
| cg04317940 | 7  |            | PMS2;AIMP2;PMS2                    |
| cg16204552 | 7  |            | RPS2P32                            |

|            |    |            |                                    |
|------------|----|------------|------------------------------------|
| cg24534135 | 2  |            | LOC643387;LOC151174;LOC151174      |
| cg08039008 | 3  | rs4927700  | SDHAP1                             |
| cg02642822 | 17 |            | LOC404266;LOC404266                |
| cg10423910 | 5  |            | SLC12A2;FLJ33630                   |
| cg12029639 | 13 |            | MIR548F5;NBEA;MAB21L1              |
| cg19271190 | 6  |            | LST1;LST1;LST1;LST1;LST1;LST1;LST1 |
| cg03754250 | 10 | rs1612433  | ZNF438;ZNF438;ZNF438;ZNF438;ZN     |
| cg26180383 | 8  |            | MIR1207;PVT1                       |
| cg13413744 | 9  |            | SUGT1P1;NOL6;NOL6                  |
| cg13319286 | 10 | rs12263149 | RHOBTB1;RHOBTB1                    |
| cg11985680 | 1  |            | SNORD45C;RABGGTB                   |
| cg09891393 | 16 |            | LOC100129637                       |
| cg13443953 | 12 | rs2231747  | NECAP1;NECAP1                      |
| cg06384413 | 17 |            | LOC404266;LOC404266;LOC404266;     |
| cg09000356 | 17 |            | SCARNA16;C17orf86                  |
| cg14674124 | 10 | rs78846868 | MIR202                             |
| cg05300697 | 1  |            | BRP44;DCAF6;BRP44;BRP44;DCAF6      |
| cg09741592 | 12 |            | HNRNPA1;HNRPA1L-2;HNRNPA1          |
| cg14431528 | 14 |            | MIR453;MIR485;MIR668               |
| cg01783662 | 3  |            | SOX2OT                             |
| cg12829142 | 7  |            | RPS2P32                            |
| cg20004406 | 19 |            | ZNF542;ZNF542;ZNF542;ZNF542        |
| cg11023442 | 17 |            | LOC100306951;INPP5K;INPP5K;INPF    |
| cg14971895 | 10 |            | GPR158;LOC100128811                |
| cg03841560 | 21 |            | MCM3APAS;LSS;LSS;LSS;LSS           |
| cg15207422 | 19 |            | LOC729991-MEF2B;LOC729991-MEF      |
| cg06938143 | 8  |            | C8orf12                            |
| cg13378519 | 1  |            | GNRHR2;PEX11B                      |
| cg26859841 | 1  |            | DUSP5P                             |
| cg24842733 | 6  |            | SNAP91;SNAP91                      |
| cg08445226 | 3  |            | C3orf26;MIR548G                    |
| cg08268266 | 16 |            | LITAF;LITAF;LITAF;LITAF            |
| cg18323835 | 5  | rs34933713 | HINT1;HINT1;HINT1                  |
| cg22138461 | 2  |            | DCAF17;METTL8;METTL8;DCAF17;D      |
| cg11882478 | 17 |            | SHBG;SAT2;SHBG                     |
| cg11346962 | 7  |            | FLJ45340                           |
| cg14092529 | 5  |            | LOC728411;LOC728411;LOC728411      |
| cg02425416 | 11 | rs17885389 | IGF2AS;INS-IGF2;IGF2;IGF2;IGF2AS   |
| cg13750180 | 7  |            | ZNF815                             |
| cg11985277 | 14 |            | FUT8;FUT8;FUT8;FUT8;FUT8;FUT8;L    |
| cg08610383 | 16 |            | GFOD2;GFOD2;GFOD2                  |
| cg18020072 | 6  | rs9688644  | SNORA38;BAT2                       |
| cg19747960 | 8  | rs79576182 | C8orf12                            |
| cg24949133 | 16 | rs153211   | RRN3P2                             |



|            |    |            |                                  |
|------------|----|------------|----------------------------------|
| cg02238136 | 3  |            | ZNF620;ZNF620                    |
| cg27304754 | 16 |            | CALB2;CALB2;CALB2                |
| cg14184693 | 15 |            | SERF2;MIR1282                    |
| cg11321965 | 19 |            | MORG1;MORG1;C19orf56;MORG1;M     |
| cg04628802 | 16 |            | CALB2;CALB2;CALB2                |
| cg02672678 | 3  |            | NCBP2;LOC152217;NCBP2            |
| cg18268988 | 11 |            | TIMM8B;SDHD;TIMM8B               |
| cg03658244 | 18 | rs77243838 | MAPRE2;MAPRE2;MAPRE2;MAPRE2      |
| cg18159646 | 11 |            | SNORD22;SNORD31;SNORD30;SNHC     |
| cg24569270 | 16 |            | MGC23284;MVD;MGC23284            |
| cg03810913 | 10 |            | LOC283050;LOC283050;LOC283050;   |
| cg15229153 | 17 |            | RPAIN;RPAIN;RPAIN;RPAIN;RPAIN;R  |
| cg17783086 | 17 | rs75874866 | LOC146880;LOC146880              |
| cg23384340 | 11 | rs12786431 | MED19;TMX2;TMX2;TMX2             |
| cg08016363 | 17 | rs59253142 | TMEM11;TMEM11                    |
| cg22806002 | 11 |            | BTG4;MIR34C;MIR34B               |
| cg00221327 | 6  |            | DAXX;DAXX;DAXX;DAXX              |
| cg00565075 | 22 |            | MIR659;EIF3L                     |
| cg02662155 | 11 |            | KIAA0652;KIAA0652;KIAA0652;HARE  |
| cg00909926 | 1  |            | ESRRG;ESRRG;ESRRG;ESRRG;ESRRG    |
| cg06800444 | 8  |            | TM2D2;TM2D2;ADAM9;ADAM9;AD       |
| cg14286941 | 20 |            | EDEM2;EDEM2;EDEM2                |
| cg02398725 | 11 |            | CREBZF;CREBZF;CREBZF;CREBZF;CRE  |
| cg07599979 | 21 |            | DSCR9                            |
| cg13303256 | 6  |            | PHF1;PHF1;PHF1                   |
| cg18735641 | 6  | rs17190183 | HCG22                            |
| cg22226091 | 18 |            | ATP5A1;HAUS1;HAUS1               |
| cg16474117 | 12 |            | CALCOCO1;CALCOCO1;CALCOCO1       |
| cg01644741 | 20 |            | MIR1259;SNORD12B;C20orf199;C20   |
| cg05663643 | 6  |            | ZNRD1;ZNRD1;NCRNA00171           |
| cg14835962 | 22 |            | THAP7;THAP7;FLJ39582;FLJ39582    |
| cg26439916 | 16 |            | TRAF7;SNORD60                    |
| cg13149127 | 1  |            | C1orf61;MIR9-1                   |
| cg18183073 | 5  |            | FLJ42709;FLJ42709                |
| cg25267526 | 19 |            | MORG1;MORG1;MAN2B1;MORG1         |
| cg06951969 | 15 |            | SMAD6;SMAD6                      |
| cg07679725 | 2  |            | TMEM185B                         |
| cg15397506 | 4  |            | LOC93622                         |
| cg03382121 | 6  |            | DAXX;DAXX;DAXX;DAXX              |
| cg10259392 | 11 |            | LRTOMT;LRTOMT;NUMA1;LRTOMT;      |
| cg13780516 | 9  |            | GGTA1                            |
| cg15213565 | 6  |            | TRIM39;HCG18;HCG18;TRIM39        |
| cg16880856 | 7  |            | FABP5L3;MLL3                     |
| cg10387807 | 1  |            | C1orf27;C1orf27;MIR548F1;C1orf27 |

|            |    |            |            |                                   |
|------------|----|------------|------------|-----------------------------------|
| cg14037240 | 10 | rs9424166  | rs75365661 | ASB13;ASB13                       |
| cg18846731 | 11 |            |            | CREBZF;CREBZF;CREBZF;CREBZF;CRE   |
| cg20863107 | 13 |            |            | DLEU2                             |
| cg22841336 | 12 |            |            | ATP5B;SNORD59A                    |
| cg05205351 | 20 | rs73576051 |            | NOP56;SNORD110;NOP56;SNORA51      |
| cg00704289 | 14 |            |            | RAB2B;TOX4;RAB2B;RAB2B            |
| cg04270358 | 5  |            |            | LOC645323;LOC645323;LOC645323     |
| cg02780767 | 12 |            | rs4883091  | LOC653113                         |
| cg08329777 | 17 |            |            | LOC92659;MAFG                     |
| cg04114269 | 3  |            |            | C3orf26;FILIP1L;MIR548G;FILIP1L   |
| cg15160445 | 20 |            |            | GNAS;GNAS;GNAS;GNASAS             |
| cg03626025 | 15 |            |            | CCNDBP1;CCNDBP1;CCNDBP1;CCNE      |
| cg12480658 | 2  |            |            | ATF2;MIR933                       |
| cg08375286 | 6  |            |            | DAXX;DAXX;DAXX;DAXX               |
| cg15460330 | 8  | rs7840270  |            | TM2D2;TM2D2;ADAM9;TM2D2;ADA       |
| cg06685111 | 6  |            |            | HCG18;TRIM39;TRIM39;HCG18;TRIM    |
| cg22230395 | 5  |            |            | FAM114A2;MFAP3;MFAP3;MFAP3        |
| cg14088052 | 7  |            |            | CCM2;CCM2;CCM2;CCM2               |
| cg20440041 | 19 |            |            | ZNF382;ZNF529;ZNF529;ZNF529       |
| cg11136708 | 22 |            |            | ZNF74;ZNF74                       |
| cg09522706 | 7  |            |            | MCM7;MCM7;MIR25;MIR93             |
| cg03046332 | 3  |            |            | FYTTD1;FYTTD1;FYTTD1;KIAA0226     |
| cg16311158 | 13 |            |            | UBAC2;UBAC2;UBAC2;UBAC2           |
| cg09537434 | 19 | rs13346603 |            | ATP5SL;ATP5SL;ATP5SL;ATP5SL;ATP!  |
| cg04088697 | 7  | rs1476605  |            | DLX6AS                            |
| cg19910802 | 14 |            | rs74086033 | C14orf132                         |
| cg08335854 | 5  |            |            | LOC285696;BASP1                   |
| cg00819055 | 2  |            |            | UGGT1;UGGT1                       |
| cg27495572 | 2  |            | rs11896779 | TTN;TTN;TTN;MIR548N;TTN           |
| cg06379531 | 1  |            |            | TSEN15;TSEN15;TSEN15              |
| cg11995506 | 6  |            |            | RNF5;AGPAT1;RNF5P1;RNF5           |
| cg21085351 | 17 |            |            | SNORD104;SNORA76                  |
| cg16817891 | 11 |            |            | IGF2AS;INS-IGF2;IGF2;IGF2AS       |
| cg02000145 | 6  | rs2239526  |            | BAT1;SNORD84;BAT1                 |
| cg19182014 | 20 | rs76425596 |            | HMGB3L1                           |
| cg11111696 | 10 |            |            | ZNF438;ZNF438;ZNF438;ZNF438;ZN    |
| cg14230378 | 3  |            |            | NUDT16P;NUDT16P                   |
| cg19543987 | 2  |            | rs57336116 | CCT7;CCT7;CCT7;CCT7;C2orf7;CCT7;  |
| cg21356536 | 6  |            |            | MOCS1;MOCS1                       |
| cg21358678 | 6  |            |            | RNF5;RNF5P1                       |
| cg07793148 | 1  |            |            | C1orf200;PIK3CD                   |
| cg14645481 | 5  |            |            | HINT1;HINT1;HINT1                 |
| cg17606683 | 11 |            |            | C11orf73;C11orf73;C11orf73;C11orf |
| cg14036884 | 19 |            |            | XAB2;LOC100131801;LOC10013180:    |

|            |               |                                       |
|------------|---------------|---------------------------------------|
| cg17752846 | 2             | MTX2;MTX2;MTX2                        |
| cg18442830 | 17            | LOC284009                             |
| cg17416608 | 12            | ERC1;ERC1;ERC1;ERC1;ERC1              |
| cg02505002 | 19 rs61739688 | C3P1                                  |
| cg13346869 | 8             | LOC728024;ERLIN2                      |
| cg20333067 | 17            | ZNF207;MIR632;ZNF207;ZNF207           |
| cg26529556 | 17            | SNORD104;SNORA76                      |
| cg02233558 | 5             | SLC12A2;FLJ33630                      |
| cg07962315 | 9             | OSTF1;C9orf95;C9orf95;C9orf95         |
| cg27426882 | 7             | PMS2L11                               |
| cg09994773 | 1             | MIR34A                                |
| cg03997643 | 9             | RNU6ATAC                              |
| cg07363270 | 2             | LOC440925                             |
| cg11572390 | 1             | SMG5;TMEM79;TMEM79                    |
| cg06868758 | 2             | EEF1B2;EEF1B2;SNORD51;NDUFS1;E        |
| cg15981195 | 9             | FLJ35024;VLDLR;VLDLR                  |
| cg24451074 | 3             | H1FX;C3orf47                          |
| cg20009101 | 22            | psiTPTE22                             |
| cg17036441 | 3             | NCBP2;LOC152217;NCBP2                 |
| cg18088712 | 1             | CROCCL2                               |
| cg20289299 | 6 rs1059306   | SNHG5;SNORD50B;SNORD50A               |
| cg05200614 | 14            | MEG3;MEG3;MEG3                        |
| cg23837897 | 17 rs12937360 | COX11;COX11;COX11;COX11;STXBP4        |
| cg23576358 | 4             | LOC93622                              |
| cg15196165 | 6             | HCG9                                  |
| cg16682926 | 20            | GNASAS                                |
| cg20787693 | 1             | FAM54B;FAM54B;FAM54B;FAM54B           |
| cg04690289 | 3 rs79296608  | ZDHHC3;ZDHHC3;EXOSC7;ZDHHC3;EXOSC7    |
| cg25730804 | 7             | DPY19L2P4                             |
| cg18080509 | 6             | C6orf147                              |
| cg26580576 | 4             | LOC93622                              |
| cg01356463 | 12 rs4767067  | C12orf47;MAPKAPK5;MAPKAPK5            |
| cg20027050 | 11            | LRTOMT;LRTOMT;LRTOMT;LRTOMT           |
| cg26336277 | 3             | FYTDD1;KIAA0226;KIAA0226;FYTDD1       |
| cg04598683 | 11            | NCRNA00167;PRDM10;PRDM10              |
| cg14622857 | 15            | LOC646214                             |
| cg21420531 | 2             | SLC5A6;C2orf28;SLC5A6;C2orf28;C2orf28 |
| cg01171597 | 15            | ADPGK;ADPGK;ADPGK                     |
| cg07664027 | 19            | RPL13AP5;RPL13A                       |
| cg09670616 | 2             | ZEB2;ZEB2;ZEB2;ZEB2;ZEB2              |
| cg00617305 | 1             | SHISA4;SHISA4;SHISA4                  |
| cg26419621 | 1 rs41270837  | SNHG3-RCC1;SNHG3;SNHG3-RCC1;SNHG3     |
| cg11540416 | 15            | HEXA;C15orf34                         |
| cg16906300 | 20            | HSPC072;LOC100270804;HSPC072          |

|            |    |            |                                   |
|------------|----|------------|-----------------------------------|
| cg03019000 | 3  |            | TEX264;TEX264;TEX264              |
| cg02779230 | 1  |            | TRNAU1AP;TRNAU1AP                 |
| cg23521835 | 6  | rs13197636 | STL                               |
| cg06048102 | 13 |            | GUCY1B2                           |
| cg18912574 | 7  |            | NCRNA00174                        |
| cg15671181 | 18 |            | AQP4;AQP4;C18orf16                |
| cg01194468 | 9  |            | SUGT1P1;CHMP5;BAG1                |
| cg08798701 | 3  |            | RPL32P3                           |
| cg16865908 | 11 |            | LOC399959;MIR125B1                |
| cg06368721 | 6  |            | STK19;STK19;DOM3Z;STK19           |
| cg05384664 | 11 | rs3213232  | INS-IGF2;IGF2;IGF2;IGF2           |
| cg10866856 | 20 |            | FER1L4                            |
| cg19415743 | 11 |            | TMEM41B;TMEM41B;TMEM41B           |
| cg16065241 | 17 |            | DNAJC7;NKIRAS2;DNAJC7;DNAJC7      |
| cg20271396 | 1  |            | TSEN15;TSEN15;TSEN15              |
| cg04894169 | 3  | rs3731055  | XPC;XPC;XPC;LSM3                  |
| cg03876030 | 11 |            | NCRNA00167;PRDM10;PRDM10          |
| cg27228559 | 10 |            | CASC2;RAB11FIP2;CASC2;CASC2       |
| cg12376277 | 22 |            | TUG1                              |
| cg16769595 | 3  |            | MOBP;MOBP                         |
| cg08576598 | 7  | rs3034485  | WNT2;WNT2                         |
| cg03543403 | 12 |            | DIABLO;DIABLO;DIABLO;DIABLO       |
| cg03172947 | 20 |            | DBNDD2;DBNDD2;DBNDD2;DBNDD2       |
| cg02997086 | 17 |            | DNAJC7;DNAJC7;DNAJC7;NKIRAS2      |
| cg14009632 | 6  |            | TJAP1;TJAP1;TJAP1;TJAP1;TJAP1;TJA |
| cg05827631 | 1  |            | LOC647121                         |
| cg26227225 | 1  |            | C1orf86;LOC100128003;C1orf86      |
| cg09697458 | 16 |            | CALB2;CALB2;CALB2                 |
| cg00328284 | 8  |            | ANK1;ANK1;ANK1;ANK1;ANK1;ANK1     |
| cg17176195 | 11 | rs72166545 | LOC100133315;RNF121;RNF121;RNI    |
| cg04556854 | 4  | rs61739499 | BBS12;LOC729338                   |
| cg03054141 | 12 |            | NECAP1;NECAP1                     |
| cg16265348 | 20 |            | LOC284798;LOC284798;LOC284798     |
| cg26900259 | 5  |            | TRIM23;C5orf44;TRIM23;TRIM23;C5   |
| cg04712457 | 11 | rs35773617 | OTUB1;OTUB1                       |
| cg23489587 | 5  |            | LOC728554                         |
| cg23395310 | 9  |            | SNHG7;SNHG7;SNHG7                 |
| cg17542751 | 22 |            | PARVG;PARVG                       |
| cg23940614 | 15 | rs923968   | SH3GL3;SH3GL3                     |
| cg25477181 | 22 |            | PITPNB;LOC284900;LOC284900        |
| cg09250933 | 2  |            | PAX8;PAX8;PAX8;PAX8;PAX8;LOC44    |
| cg17143518 | 18 |            | CABLES1;CABLES1                   |
| cg01492656 | 4  |            | N4BP2;LOC344967                   |
| cg11456838 | 6  |            | OSTCL                             |

|            |    |            |                                    |
|------------|----|------------|------------------------------------|
| cg13947334 | 9  |            | C9orf27                            |
| cg14244887 | 9  |            | LOC554202                          |
| cg24343312 | 7  |            | LOC401397;LOC401397                |
| cg12608507 | 2  |            | EEF1B2;EEF1B2;SNORD51;NDUFS1;S     |
| cg11150068 | 10 |            | XPNPEP1;XPNPEP1;XPNPEP1            |
| cg00004963 | 6  | rs259389   | LOC729176;C6orf103                 |
| cg22877570 | 3  |            | TNIK;TNIK;TNIK;TNIK;TNIK;TNIK;TNIK |
| cg02895602 | 14 | rs76713753 | MIR1185-2                          |
| cg23146741 | 8  |            | RNF170;RNF170;RNF170;RNF170;RN     |
| cg18340059 | 14 |            | RTL1;MIR431;MIR433                 |
| cg19131227 | 11 |            | IGF2AS;INS-IGF2;IGF2;IGF2;IGF2AS   |
| cg02819921 | 2  |            | E2F6;E2F6;E2F6;E2F6;E2F6           |
| cg17602882 | 19 |            | MIR1181;CDC37                      |
| cg04834666 | 20 |            | EDEM2;EDEM2;EDEM2                  |
| cg18730744 | 20 |            | SNORD119;SNRPB;SNRPB               |
| cg10638415 | 19 |            | ZNF542;ZNF542;ZNF542;ZNF542        |
| cg06189265 | 1  | rs75315904 | GAS5;SNORD76;SNORD75;SNORD77       |
| cg10781814 | 19 | rs73922817 | LOC729991-MEF2B;LOC729991-MEF      |
| cg01047218 | 11 |            | KDM2A;KDM2A                        |
| cg13247671 | 7  |            | MKLN1;FLJ43663                     |
| cg07708721 | 6  |            | SNORA38;BAT2                       |
| cg03108344 | 6  | rs7762217  | RAET1K                             |
| cg12760563 | 18 |            | DLGAP1;FLJ35776;DLGAP1             |
| cg10075436 | 19 |            | MZF1;MZF1;MZF1;MZF1;LOC100131      |
| cg05937182 | 7  |            | ST7OT4;ST7OT1;ST7;ST7              |
| cg16220802 | 4  | rs75022636 | MAPKSP1;MAPKSP1                    |
| cg14633504 | 5  |            | VTRNA1-1                           |
| cg08322240 | 8  |            | ZFHX4;LOC100192378                 |
| cg18090064 | 17 |            | C17orf69;C17orf69                  |
| cg16259268 | 2  |            | EFHD1                              |
| cg05648582 | 9  |            | LOC100129066                       |
| cg10791580 | 6  | rs9402287  | LOC285733                          |
| cg05658236 | 1  |            | MGC12982                           |
| cg21268653 | 1  |            | C1orf203;C1orf203;C1orf203;C1orf2  |
| cg01695023 | 22 |            | P2RX6P                             |
| cg22872906 | 4  |            | LOC285419;LOC285419                |
| cg17002091 | 14 |            | SLC25A29;MIR345;SLC25A29           |
| cg17606003 | 10 |            | FLJ41350;LBX1                      |
| cg22424444 | 11 |            | LOC255512;TOLLIP                   |
| cg02413874 | 16 |            | LOC100134368                       |
| cg03601585 | 11 |            | SNORD27;SLC3A2;SLC3A2;SNORD28      |
| cg10436540 | 17 |            | ZZEF1;CYB5D2;CYB5D2;CYB5D2         |
| cg08182240 | 11 |            | TBRG1;TBRG1                        |
| cg04061361 | 15 | rs41286586 | SNORD116-1                         |

|            |    |            |                                   |
|------------|----|------------|-----------------------------------|
| cg25889944 | 7  |            | SBDSP;SBDSP;SBDSP;TYW1B;TYW1B     |
| cg21701531 | 2  |            | ZEB2;ZEB2;ZEB2                    |
| cg24765924 | 5  | rs79940373 | LOC255167;LOC255167               |
| cg24123518 | 15 |            | ISLR2;LOC283731;ISLR2;ISLR2;ISLR2 |
| cg12069073 | 11 |            | KDM2A;KDM2A                       |
| cg07429629 | 14 |            | MIR494                            |
| cg08421051 | 12 |            | LOC338799                         |
| cg11581046 | 19 |            | MIR639;TECR                       |
| cg10592336 | 4  |            | LOC550112;UBA6                    |
| cg10285420 | 6  |            | DAXX;DAXX;DAXX;DAXX               |
| cg23156781 | 2  |            | SLC5A6;C2orf28;SLC5A6;C2orf28;C2  |
| cg17709884 | 4  |            | H2AFZ;LOC256880                   |
| cg14983728 | 22 |            | TOM1;TOM1;TOM1;TOM1;TOM1;TC       |
| cg05355679 | 1  |            | SNORD55;SNORD46;RPS8              |
| cg16688046 | 9  |            | NCRNA00094                        |
| cg02732671 | 3  |            | CEP63;ANAPC13;ANAPC13;CEP63;AI    |
| cg19844233 | 11 |            | CREBZF;CREBZF;CREBZF;CREBZF;CRE   |
| cg02649933 | 6  | rs16893483 | ZNRD1;ZNRD1;NCRNA00171            |
| cg01284415 | 19 |            | BAX;BAX;BAX;BAX;BAX               |
| cg20365618 | 10 | rs78311227 | INPP5F;INPP5F                     |
| cg22209624 | 1  |            | SERTAD4;C1orf133                  |
| cg01733045 | 3  |            | TEX264;TEX264;TEX264              |
| cg20189761 | 8  |            | REXO1L2P;REXO1L1                  |
| cg12124911 | 12 |            | RACGAP1P                          |
| cg14031414 | 20 |            | ESF1;C20orf7;C20orf7;C20orf7      |
| cg00285343 | 7  |            | LOC285954;LOC285954;INHBA         |
| cg20377766 | 10 | rs71487871 | LOC387646                         |
| cg10265786 | 6  | rs75831035 | DOM3Z;STK19;STK19;DOM3Z;STK19     |
| cg03591594 | 9  |            | VLDLR;VLDLR;VLDLR;VLDLR;FLJ3502   |
| cg21871735 | 16 |            | SNHG9;RPS2;SNORA78                |
| cg12792526 | 21 |            | NCRNA00111                        |
| cg05863098 | 14 | rs61980703 | C14orf48;C14orf48;C14orf48        |
| cg03322749 | 9  |            | RBM18;MRRF;RBM18;RBM18;MRRF       |
| cg20254273 | 1  |            | MDS2                              |
| cg03306972 | 3  |            | NCBP2;LOC152217;NCBP2             |
| cg17797815 | 10 |            | CASC2;RAB11FIP2;CASC2;CASC2       |
| cg24154325 | 14 |            | C14orf23;C14orf23                 |
| cg25134231 | 2  |            | CLASP1;CLASP1;CLASP1;RNU4ATAC     |
| cg22889142 | 19 |            | NCRNA00181;A1BG                   |
| cg01665432 | 12 |            | SNORA2A;C12orf41                  |
| cg04091325 | 15 |            | SH3GL3;SH3GL3                     |
| cg27210565 | 10 |            | CDC10L                            |
| cg13443893 | 6  |            | DAXX;DAXX;DAXX;DAXX               |
| cg10020897 | 1  |            | BRP44;BRP44;DCAF6;BRP44;DCAF6     |

|            |    |            |                                  |
|------------|----|------------|----------------------------------|
| cg13611065 | 22 |            | LOC96610                         |
| cg06477715 | 13 |            | LOC100288730;PAN3;PAN3           |
| cg10956413 | 22 |            | TMEM191A                         |
| cg18189409 | 22 |            | LOC400891;P2RX6P                 |
| cg26332552 | 3  |            | MIR922;KIAA0226;KIAA0226         |
| cg11671290 | 6  |            | BAT1;SNORD84;BAT1                |
| cg03790236 | 11 |            | ANKRD13D;ANKRD13D                |
| cg22225943 | 11 |            | IGF2AS;INS-IGF2;IGF2;IGF2AS;IGF2 |
| cg11031889 | 15 |            | NGRN;NGRN                        |
| cg08515869 | 4  |            | MIR573                           |
| cg14387656 | 2  |            | EFHD1                            |
| cg04648747 | 12 |            | TBC1D15;TBC1D15;TBC1D15;TBC1D    |
| cg25745713 | 1  |            | TXNDC12;BTF3L4;BTF3L4;BTF3L4     |
| cg15823872 | 1  |            | LOC441869;LOC441869              |
| cg09358388 | 15 |            | SNORD109B;SNORD109A              |
| cg15443793 | 19 |            | ECSIT;ECSIT;ECSIT;ECSIT          |
| cg06708720 | 12 |            | ERC1;ERC1;ERC1;ERC1;ERC1         |
| cg22236626 | 1  |            | NENF;NENF                        |
| cg07211511 | 3  |            | LOC729375                        |
| cg05017015 | 14 |            | DCAF11;DCAF11;DCAF11;DCAF11;D    |
| cg01747862 | 4  |            | NBLA00301                        |
| cg22817659 | 8  | rs34819009 | LY6E;LOC100133669;LY6E           |
| cg09436420 | 3  |            | LOC100128164;SEC62;LOC10012816   |
| cg12932539 | 22 |            | TOM1;TOM1;TOM1;TOM1;TOM1;TC      |
| cg06395988 | 2  |            | MTERFD2;MTERFD2;MTERFD2;MTEI     |
| cg14611084 | 7  |            | FLJ35390;FLJ35390;RASA4P         |
| cg07383130 | 1  |            | FLJ37453                         |
| cg04838987 | 20 |            | EDEM2;EDEM2;EDEM2                |
| cg00797104 | 6  |            | PPP1R2P1                         |
| cg06967120 | 10 |            | LOC100128811;GPR158              |
| cg06174989 | 16 |            | LOC100130015;LOC100130015        |
| cg04195831 | 1  |            | MST1P9                           |
| cg26833449 | 7  | rs73104620 | Sep-13                           |
| cg20210449 | 7  |            | FAM185A;FAM185A;FAM185A          |
| cg01250407 | 7  |            | WNT2;WNT2                        |
| cg21371335 | 17 |            | DNAJC7;DNAJC7;DNAJC7;NKIRAS2     |
| cg20272962 | 17 |            | LPO;LPO;LPO                      |
| cg07535928 | 14 |            | SLC25A21;SLC25A21;LOC100129794   |
| cg14017196 | 12 |            | HNRNPA1;HNRPA1L-2;HNRNPA1;CB     |
| cg19470159 | 3  |            | C3orf50                          |
| cg21158476 | 5  |            | LOC389332                        |
| cg00366813 | 2  |            | DCAF17;METTL8;DCAF17;DCAF17      |
| cg08264435 | 3  |            | H1FX;C3orf47                     |
| cg06599927 | 1  |            | MST1P2                           |

|            |    |            |                                 |
|------------|----|------------|---------------------------------|
| cg21444593 | 1  |            | SNORA14B;TOMM20                 |
| cg11351987 | 19 |            | C19orf30                        |
| cg03158561 | 11 |            | RPL27A;SNORA45                  |
| cg19922435 | 4  |            | LOC285419;LOC285419             |
| cg18426224 | 15 | rs74196431 | GOLGA8B                         |
| cg08411735 | 13 |            | TPT1;LOC100190939               |
| cg11731114 | 10 |            | FLJ45983;GATA3;GATA3;FLJ45983   |
| cg13408636 | 14 |            | PPP1R3E                         |
| cg17152135 | 6  |            | PHF1;PHF1;PHF1                  |
| cg26728851 | 11 |            | GUCY2E                          |
| cg26171815 | 5  |            | MIR580;LMBRD2                   |
| cg23374762 | 18 |            | TXNL1;TXNL1                     |
| cg11014109 | 11 | rs11278358 | NARS2;NARS2                     |
| cg21404028 | 1  |            | TSEN15;TSEN15;TSEN15            |
| cg19348206 | 10 |            | MIR202                          |
| cg07717512 | 6  |            | HCG22                           |
| cg01271129 | 3  |            | KCNMB3;KCNMB3;KCNMB3;KCNMB3     |
| cg15564267 | 11 |            | OTUB1;OTUB1                     |
| cg27212729 | 2  |            | LOC440925;SP5                   |
| cg06459669 | 10 |            | XPNPEP1;XPNPEP1;XPNPEP1         |
| cg04406441 | 4  | rs77043177 | RPL34;RPL34;LOC285456           |
| cg12488414 | 19 |            | LOC284440                       |
| cg15986668 | 1  |            | NFYC;NFYC;NFYC;LOC100130557;NF  |
| cg07177756 | 1  | rs12090169 | SNORD75;SNORD78;ZBTB37;ZBTB37   |
| cg25563983 | 22 |            | CECR7                           |
| cg08721491 | 6  |            | STK19;DOM3Z                     |
| cg04686204 | 16 |            | MGC23284;MGC23284               |
| cg01729066 | 9  |            | MIR600;C9orf45                  |
| cg16198013 | 6  | rs75648664 | LOC285740;LOC285740             |
| cg10985987 | 16 |            | LOC440356;LOC440356;CDIPT;CDIPT |
| cg09439093 | 6  |            | PECI;PECI;PECI;PECI             |
| cg01765473 | 10 |            | ATAD1;CFLP1                     |
| cg26039806 | 11 |            | RNF121;LOC100133315;RNF121;RNI  |
| cg18170098 | 16 |            | ATXN1L;ATXN1L                   |
| cg18370923 | 17 | rs4792430  | CDRT15P                         |
| cg03817476 | 2  |            | CLK1;CLK1;CLK1;CLK1             |
| cg01928411 | 12 |            | LARP4;LARP4;LARP4;LARP4;LARP4;L |
| cg00698126 | 7  | rs4727033  | rs78854238                      |
| cg14636534 | 5  |            | ZNF783                          |
| cg06988003 | 5  |            | LOC645323;LOC645323;LOC645323   |
| cg02405517 | 19 |            | FLJ42709;FLJ42709               |
| cg07854954 | 4  |            | SNAPC2;SNAPC2                   |
| cg09452846 | 15 |            | HNRPD;HNRPD                     |
| cg22946150 | 15 |            | LOC91948;LOC91948               |
|            |    |            | SH3GL3;SH3GL3;SH3GL3            |



|            |    |                       |                                  |
|------------|----|-----------------------|----------------------------------|
| cg08131204 | 22 |                       | MIR1281                          |
| cg10715637 | 10 | rs75284214            | FAS;FAS;FAS;FAS;ACTA2;FAS;FAS;FA |
| cg01522430 | 12 |                       | RPSAP52;HMGA2;HMGA2              |
| cg03981685 | 1  |                       | LOC339524                        |
| cg10961700 | 1  |                       | SETDB1;SETDB1;SETDB1             |
| cg17871739 | 19 |                       | LOC148189                        |
| cg18801197 | 3  |                       | KPNA1;KPNA1                      |
| cg24980994 | 10 |                       | ZNF503;ZNF503;C10orf41           |
| cg16370685 | 1  |                       | SETDB1;SETDB1;SETDB1             |
| cg04746199 | 2  |                       | PAX8;PAX8;PAX8;PAX8;PAX8;LOC44   |
| cg06158244 | 3  |                       | LOC401093;MBNL1;LOC401093;MBI    |
| cg24486235 | 1  | rs7512192             | LOC400794                        |
| cg18595867 | 1  |                       | MGC12982                         |
| cg03539765 | 12 |                       | LOC144571                        |
| cg01734628 | 6  |                       | RDBP;SKIV2L;MIR1236              |
| cg15232450 | 3  |                       | SETMAR;SETMAR                    |
| cg08165875 | 12 |                       | EP400NL                          |
| cg10519437 | 14 |                       | CFL2;CFL2;CFL2;CFL2              |
| cg22231012 | 6  |                       | DKFZP686I15217;DKFZP686I15217    |
| cg04073608 | 11 |                       | MALAT1                           |
| cg18039643 | 11 |                       | SNORD27;SNORD26;SNORD29;SNOF     |
| cg10273096 | 9  |                       | C9orf130;C9orf102;C9orf130       |
| cg22829917 | 12 | rs60674771 rs74348153 | HOTAIR                           |
| cg17512365 | 6  |                       | HCG4                             |
| cg13287964 | 18 |                       | LOC100130522;LOC100130522        |
| cg24576735 | 10 |                       | MARVELD1;MARVELD1                |
| cg18014500 | 10 |                       | GUCY2G                           |
| cg21626735 | 13 | rs61944965            | DKFZp686A1627                    |
| cg04095971 | 6  |                       | ZNRD1;ZNRD1;NCRNA00171           |
| cg18806997 | 1  |                       | SNORD46;RPS8;SNORD38A            |
| cg01026898 | 11 | rs80322963            | LOC221122                        |
| cg26532627 | 17 |                       | LOC100133991;LOC100133991;C17    |
| cg25100475 | 1  |                       | ZNF678;ZNF678                    |
| cg00893045 | 15 |                       | SNORD18A;RPL4;SNORD18B;SNORD     |
| cg00028034 | 20 |                       | TSPYL3                           |
| cg09859768 | 4  |                       | LOC641518;LOC641518              |
| cg05927268 | 14 |                       | ABCD4;ABCD4                      |
| cg10247798 | 3  | rs75054057            | ABHD14B;ABHD14B;ABHD14A;ABHI     |
| cg15085006 | 3  |                       | DHX30;DHX30;MIR1226              |
| cg19535073 | 7  |                       | LOC285954;LOC285954;INHBA        |
| cg07095072 | 7  |                       | MLL5;LOC100216545;MLL5           |
| cg27633139 | 4  |                       | MIR548I2                         |
| cg25584081 | 22 | rs470082              | RPL3;SNORD43;RPL3                |
| cg20300514 | 1  |                       | C1orf86;LOC100128003             |

|            |    |                      |                                    |
|------------|----|----------------------|------------------------------------|
| cg22089899 | 3  |                      | ALG3;ECE2;ALG3;ECE2;ALG3;ALG3      |
| cg05207077 | 12 |                      | FAM138D                            |
| cg26364911 | 9  |                      | HIATL2                             |
| cg18455650 | 2  |                      | PP14571;GPC1                       |
| cg09158487 | 12 |                      | HNRNPA1;HNRPA1L-2;HNRNPA1;CB       |
| cg07740199 | 18 | rs61173354           | LOC284233                          |
| cg19734870 | 5  |                      | LOC645323                          |
| cg15413793 | 17 |                      | MGC57346;MGC57346                  |
| cg21170636 | 9  |                      | SNORD24;MED22;RPL7A;MED22          |
| cg16704590 | 20 |                      | C20orf199;C20orf199;SNORD12B;SN    |
| cg25591418 | 22 |                      | LOC730668                          |
| cg08643007 | 2  |                      | ATF2;ATF2;MIR933                   |
| cg11208853 | 12 |                      | LOC653113                          |
| cg24647276 | 10 |                      | FLJ45983;GATA3;GATA3;FLJ45983      |
| cg09448652 | 11 |                      | SNORD30;SNORD22;SNORD31;SNHC       |
| cg24330775 | 19 |                      | GYS1;GYS1;GYS1;RUVBL2              |
| cg02616186 | 1  |                      | NAV1;MIR1231;NAV1                  |
| cg16067752 | 22 | rs60039951           | LOC96610                           |
| cg10177030 | 20 |                      | C20orf199;C20orf199;SNORD12;C2C    |
| cg00434295 | 13 |                      | SUGT1L1                            |
| cg21110646 | 11 |                      | TMEM41B;TMEM41B;TMEM41B            |
| cg04810755 | 1  |                      | MST1P9                             |
| cg05378690 | 3  | rs2077960 rs11557630 | IP6K2;IP6K2;IP6K2;IP6K2;IP6K2;IP6K |
| cg10656255 | 15 |                      | DET1;DET1;DET1                     |
| cg15629460 | 1  | rs67396868           | ESPNP                              |
| cg20206204 | 12 |                      | MIR614                             |
| cg06559547 | 6  |                      | SNHG5;SNORD50B;SNORD50A            |
| cg11601000 | 22 | rs28722907           | LOC339674                          |
| cg02020829 | 5  | rs7712899            | FLJ42709;FLJ42709                  |
| cg02003624 | 2  | rs75904319           | UGGT1;UGGT1                        |
| cg11389773 | 16 |                      | LOC641298;RRN3P3                   |
| cg07401773 | 9  |                      | HIATL2                             |
| cg12622938 | 7  | rs2527272            | STAG3L2;PMS2L5;PMS2L5;PMS2L5       |
| cg03639021 | 5  | rs61736974           | GNB2L1;SNORD95                     |
| cg26759552 | 7  |                      | LOC100134229;JHDM1D                |
| cg02743050 | 15 |                      | GRINL1A;GCOM1;GRINL1A;GCOM1;       |
| cg04425997 | 20 |                      | SNORD119;SNRPB;SNRPB               |
| cg16273041 | 11 | rs2233351            | KBTBD4;KBTBD4;NDUFS3;KBTBD4        |
| cg23007574 | 19 |                      | ATP5SL;ATP5SL;ATP5SL;ATP5SL;ATP!   |
| cg22050893 | 2  |                      | MIR548N;FKBP7;FKBP7                |
| cg23167644 | 17 |                      | LOC100130581;LOC100130581          |
| cg20539321 | 10 | rs7095041            | LOC219347;LOC219347;C10orf57;LC    |
| cg13770529 | 17 |                      | CCDC55;MIR423                      |
| cg11821796 | 11 |                      | LOC100130987                       |

|            |    |            |                                   |
|------------|----|------------|-----------------------------------|
| cg09293122 | 7  |            | GATS;STAG3;GATS;GATS;GATS         |
| cg11668917 | 2  |            | SNORA80B;ODC1                     |
| cg21505509 | 8  | rs77030027 | LOC728024;ERLIN2                  |
| cg07925542 | 16 |            | MIR484;NDE1;NDE1;KIAA0430         |
| cg21973405 | 5  |            | PPAP2A;PPAP2A;RNF138P1            |
| cg14390758 | 10 |            | LOC100128811;GPR158               |
| cg24394891 | 10 |            | XPNPEP1;XPNPEP1;XPNPEP1           |
| cg17274080 | 22 |            | UBE2L3;UBE2L3;UBE2L3              |
| cg01356611 | 19 |            | SNAR-C5;SNAR-C2;SNAR-C1           |
| cg01404873 | 13 |            | DLEU2                             |
| cg26410121 | 1  |            | LOC728875                         |
| cg02767068 | 16 |            | CORO1A;LOC606724                  |
| cg19982557 | 2  |            | FAM128A;LOC150776                 |
| cg03742947 | 6  |            | HLA-H                             |
| cg25151638 | 1  |            | SHC1;SHC1;CKS1B;CKS1B             |
| cg01244514 | 14 |            | MIR494                            |
| cg00781110 | 15 |            | LOC283731;ISLR2;ISLR2;ISLR2;ISLR2 |
| cg19746906 | 1  |            | HHLA3;HHLA3;HHLA3;HHLA3;ANKRI     |
| cg03863549 | 9  |            | NOL6;SUGT1P1;NOL6                 |
| cg01612532 | 15 | rs1058828  | HERC2P2                           |
| cg21187554 | 9  |            | ANKRD18A;ANKRD18A;C9orf122        |
| cg08235057 | 22 |            | TMEM191A                          |
| cg24764810 | 6  | rs62401701 | HCG22                             |
| cg09510698 | 6  |            | HLA-DPB2                          |
| cg12778580 | 11 |            | MIR1237;RPS6KA4;RPS6KA4           |
| cg05856015 | 4  |            | ZNF721;ABCA11P                    |
| cg13627197 | 22 |            | TOP1P2;PIWIL3                     |
| cg21076271 | 14 |            | ARHGAP5;ARHGAP5;ARHGAP5;C14c      |
| cg14445849 | 9  |            | VPS13A;VPS13A;LOC100286938;VPS    |
| cg02973270 | 6  |            | AGPAT1;RNF5;RNF5P1                |
| cg13310628 | 16 |            | SOLH;C16orf10                     |
| cg02329425 | 10 |            | LOC100188947;HECTD2;HECTD2        |
| cg00328051 | 14 |            | DIO3;MIR1247                      |
| cg14872693 | 11 |            | NEAT1                             |
| cg05096838 | 17 |            | FAM134C;TUBG1;FAM134C;TUBG1       |
| cg11902380 | 12 |            | MIR1228;LRP1                      |
| cg08200543 | 1  | rs75034630 | C1orf86;LOC100128003;C1orf86      |
| cg23288521 | 20 |            | SNORA39;SNHG11                    |
| cg16223220 | 6  | rs61232101 | HLA-H                             |
| cg26398848 | 2  |            | ACP1;ACP1;SH3YL1;ACP1;SH3YL1;AC   |
| cg20557687 | 4  |            | EDNRA;EDNRA;EDNRA;EDNRA;EDNF      |
| cg05547902 | 15 |            | LOC283731;ISLR2;ISLR2;ISLR2;ISLR2 |
| cg19199266 | 17 |            | C17orf69;C17orf69;MGC57346;MGC    |
| cg05377034 | 10 | rs3842235  | C10orf57;LOC219347;LOC219347;LC   |

|            |    |            |                               |
|------------|----|------------|-------------------------------|
| cg12846583 | 3  |            | MIR1324                       |
| cg27548270 | 12 | rs79994810 | LOC653113                     |
| cg24607140 | 20 |            | HM13;HM13;HM13;PSIMCT-1       |
| cg19712659 | 1  |            | SNHG12;SNORD99;SNORA61        |
| cg17722033 | 12 |            | NECAP1;NECAP1                 |
| cg22396798 | 15 |            | CCNDBP1;CCNDBP1;CCNDBP1;CCNE  |
| cg16473117 | 2  |            | AAK1;SNORA36C                 |
| cg19671533 | 6  |            | SNAP91;SNAP91                 |
| cg12974668 | 6  |            | MIR1275                       |
| cg01693157 | 2  |            | TUBA4B;TUBA4A                 |
| cg07301105 | 2  | rs12464121 | C2orf52                       |
| cg23802887 | 16 |            | MGC23284;SNAI3                |
| cg05221349 | 4  | rs11554385 | LOC256880;H2AFZ               |
| cg14892570 | 19 |            | MIR1470;WIZ                   |
| cg09398845 | 4  |            | LOC729338;BBS12               |
| cg04471822 | 2  |            | OR7E91P                       |
| cg07391831 | 17 | rs28742029 | ALOX12P2                      |
| cg00997234 | 6  |            | C6orf147                      |
| cg23512275 | 21 |            | LOC284837                     |
| cg04271391 | 6  |            | DAXX;DAXX;DAXX;DAXX           |
| cg08508335 | 13 | rs75534413 | DKFZp686A1627                 |
| cg24682012 | 11 |            | SMPD1;SMPD1;SMPD1             |
| cg17200337 | 4  |            | C4orf10;MFSD10;MFSD10         |
| cg19438469 | 12 |            | ORMDL2;SARNP;SARNP;SARNP      |
| cg19292611 | 13 |            | TFDP1;TFDP1                   |
| cg04886198 | 3  |            | ALG3;ECE2;ALG3;ECE2;ALG3;ALG3 |
| cg27151174 | 16 |            | CD2BP2;CD2BP2                 |
| cg11645417 | 6  |            | PACRG;PACRG;LOC285796;PACRG   |
| cg04148753 | 6  | rs78769809 | CDYL;CDYL;CDYL;CDYL           |
| cg25364861 | 12 |            | TESC;TESC;TESC                |
| cg07126399 | 14 |            | MIR412;MIR541;MIR409;MIR369   |
| cg16739247 | 1  | rs61485328 | SNORD45C;SNORD45A;RABGGTB     |
| cg09730836 | 5  |            | NCRNA00219;SNORA13            |
| cg11496432 | 8  |            | LOC728024;ERLIN2              |
| cg01966129 | 22 |            | PRAME;LOC648691;PRAME;PRAME;  |
| cg22469435 | 6  |            | NCRNA00120;AKIRIN2            |
| cg04216650 | 9  |            | FAM27C                        |
| cg08285587 | 7  |            | LOC100128822                  |
| cg03834909 | 19 |            | CIRBP;C19orf23;CIRBP;CIRBP    |
| cg26993102 | 6  | rs28729266 | HLA-L                         |
| cg17432135 | 20 | rs78076898 | SYS1;SYS1-DBNDD2              |
| cg24832215 | 19 | rs2123852  | NAPSB                         |
| cg11565911 | 12 |            | TBC1D15;TBC1D15;TBC1D15;TBC1D |
| cg26944449 | 16 |            | ABCC6P1                       |

|            |    |                       |                                  |
|------------|----|-----------------------|----------------------------------|
| cg03616030 | 8  |                       | TMEM67;TMEM67;TMEM67             |
| cg08111922 | 14 | rs34711197            | MGC23270                         |
| cg00049502 | 12 | rs4767068             | C12orf47;MAPKAPK5;MAPKAPK5       |
| cg08844770 | 19 | rs2230562             | EEF2;SNORD37                     |
| cg13632959 | 10 |                       | FAS;FAS;FAS;FAS;ACTA2;FAS;FAS;FA |
| cg03230579 | 10 |                       | ZNF37B                           |
| cg26719629 | 11 |                       | IGF2AS;INS-IGF2;IGF2;IGF2;IGF2AS |
| cg08160980 | 1  |                       | C1orf190;POMGNT1                 |
| cg15427004 | 3  |                       | ACAA1;ACAA1;ACAA1;MYD88          |
| cg13518216 | 12 |                       | ATP5B;SNORD59A                   |
| cg08064553 | 16 |                       | CENPBD1;AFG3L1;AFG3L1;CENPBD1    |
| cg13134825 | 14 | rs2025146             | SNHG10;GLRX5;SCARNA13;SNHG10     |
| cg25306442 | 1  |                       | LOC400752                        |
| cg23447792 | 12 |                       | EP400NL                          |
| cg07516476 | 9  |                       | LOC100131193;C9orf86;C9orf86     |
| cg24638668 | 12 |                       | H2AFJ;H2AFJ;H2AFJ                |
| cg00974689 | 13 |                       | TFDP1;TFDP1                      |
| cg18654971 | 5  |                       | MIR449C;CDC20B;CDC20B;CDC20B     |
| cg25996835 | 15 | rs7178130             | BBS4;HIGD2B                      |
| cg05066959 | 8  | rs72638959            | ANK1;ANK1;ANK1;ANK1;ANK1;ANK1    |
| cg09965267 | 7  |                       | POLR2J4                          |
| cg09554007 | 16 |                       | RPL13;RPL13;SNORD68;RPL13        |
| cg05781294 | 6  |                       | BAT1;SNORD117;BAT1               |
| cg05325193 | 20 |                       | C20orf56                         |
| cg23893792 | 6  | rs76592591            | CDYL                             |
| cg15275313 | 11 |                       | C11orf36                         |
| cg05144089 | 1  |                       | SNORA14B;TOMM20                  |
| cg26979143 | 17 |                       | SCARNA16;C17orf86                |
| cg04155793 | 16 |                       | CDK10;CDK10;CDK10;CDK10;CDK10;   |
| cg12278467 | 5  |                       | LOC645323;LOC645323              |
| cg08151281 | 1  |                       | DCAF6;BRP44;BRP44;BRP44;DCAF6    |
| cg06319713 | 1  |                       | LOC440926;H3F3A                  |
| cg14156148 | 15 |                       | WASH3P                           |
| cg05461153 | 7  |                       | ZNF783                           |
| cg01629329 | 20 |                       | NOP56;MIR1292;NOP56;NOP56        |
| cg14094543 | 4  |                       | LOC256880;H2AFZ                  |
| cg18090577 | 3  | rs78923843            | COL29A1;COL29A1                  |
| cg12163508 | 10 | rs2800551             | HSD17B7P2                        |
| cg10248302 | 11 |                       | MIR611;FEN1;C11orf10;FEN1        |
| cg04415427 | 7  | rs13245475 rs72106726 | MGC72080                         |
| cg07456645 | 19 |                       | C19orf30                         |
| cg00049323 | 5  |                       | LOC25845                         |
| cg16372632 | 16 |                       | CES4                             |
| cg02698926 | 7  |                       | SDK1;SDK1                        |

|             |    |            |                                    |
|-------------|----|------------|------------------------------------|
| cg14937036  | 3  |            | COPB2;COPB2                        |
| cg24569399  | 3  |            | CCDC66;CCDC66;CCDC66               |
| cg24357849  | 19 |            | DHPS;MORG1;DHPS;DHPS;MORG1;P       |
| cg23022819  | 7  |            | TBXAS1;TBXAS1;TBXAS1;TBXAS1;TB     |
| cg02315626  | 17 |            | MIR451;MIR144                      |
| cg211108361 | 7  |            | LOC286016;TNPO3;TNPO3              |
| cg17441804  | 6  | rs9258230  | LOC285830;LOC285830                |
| cg18668382  | 14 |            | GLRX5;SNHG10;SNHG10                |
| cg27200833  | 15 |            | ISLR2;LOC283731;ISLR2;ISLR2;ISLR2; |
| cg16181099  | 10 | rs11186623 | LOC100188947                       |
| cg04735310  | 17 |            | MIR196A1                           |
| cg10051588  | 4  | rs75453246 | FLJ39653;FLJ39653                  |
| cg19484886  | 12 |            | C12orf61;MIRLET7I                  |
| cg22601058  | 10 |            | LOC283070                          |
| cg17493193  | 1  |            | PDIK1L;PDIK1L;PDIK1L               |
| cg26102503  | 20 | rs45596642 | GNASAS;GNAS                        |
| cg22756156  | 10 |            | MARVELD1;LOC100270710;MARVEL       |
| cg25666433  | 6  |            | ZSCAN12;ZSCAN12                    |
| cg20310319  | 15 |            | SNORD115-15;SNORD115-21;HBII-5:    |
| cg07936672  | 2  |            | NEURL3                             |
| cg02837279  | 8  |            | ZNF252;C8orf77                     |
| cg07913197  | 2  |            | FLJ32063                           |
| cg13305165  | 3  |            | NGLY1;OXSM;OXSM;OXSM               |
| cg23523765  | 7  |            | LOC349114                          |
| cg20624698  | 2  |            | LOC339788                          |
| cg05030574  | 11 |            | NEAT1                              |
| cg06197492  | 11 | rs3741219  | H19                                |
| cg17992509  | 1  |            | MIR760                             |
| cg06048191  | 16 |            | AFG3L1;CENPBD1;AFG3L1;AFG3L1       |
| cg10591652  | 5  |            | FBLL1                              |
| cg09906647  | 17 | rs76606395 | FLJ25006;LOC645851                 |
| cg12810221  | 12 |            | ATP5B;SNORD59B;SNORD59A            |
| cg00475112  | 12 |            | LOC642846                          |
| cg22662482  | 11 |            | FEN1;C11orf10;MIR611               |
| cg04860656  | 1  | rs11559315 | WDR65;WDR65;EBNA1BP2;EBNA1B        |
| cg17423209  | 22 |            | POM121L9P                          |
| cg22901322  | 4  |            | MAPKSP1;MAPKSP1;MAPKSP1            |
| cg00253182  | 9  |            | FLJ35024                           |
| cg21634218  | 19 |            | FLJ26850                           |
| cg22406469  | 22 | rs5756693  | MFNG;MFNG;MFNG                     |
| cg25936380  | 2  |            | TMEM185B                           |
| cg24876683  | 5  |            | RPL26L1;LOC100268168;LOC100268     |
| cg08461781  | 1  |            | HIST2H2BA                          |
| cg07350076  | 8  | rs79443365 | FAM66A;DEFB109P1                   |

|            |    |                       |                                    |
|------------|----|-----------------------|------------------------------------|
| cg17283752 | 6  |                       | CDYL;CDYL;CDYL;CDYL                |
| cg19642877 | 11 |                       | IGF2AS;INS-IGF2;INS-IGF2;IGF2;IGF2 |
| cg16543923 | 3  | rs79224085            | LOC220729                          |
| cg26371346 | 8  |                       | SNORD54;RPS20;RPS20                |
| cg21300318 | 19 |                       | MIR7-3;C19orf30                    |
| cg25769852 | 12 |                       | CD69;CD69;CD69                     |
| cg02162069 | 19 |                       | ZIM2;ZIM2;PEG3;MIMT1;PEG3;PEG3     |
| cg09148270 | 11 |                       | BTG4;C11orf88;C11orf88;MIR34C      |
| cg02963846 | 17 |                       | SNORD7                             |
| cg00460092 | 10 |                       | ATAD1;CFLP1                        |
| cg10447247 | 12 |                       | NME2P1                             |
| cg06214925 | 4  |                       | LOC641518;LOC641518                |
| cg19123296 | 2  |                       | ZEB2;ZEB2;ZEB2;ZEB2;ZEB2           |
| cg08184640 | 14 |                       | FLJ45244;DICER1                    |
| cg02639007 | 12 |                       | CCDC41;CCDC41;LOC144486;CCDC4      |
| cg21171800 | 5  |                       | LOC647859                          |
| cg22455660 | 9  |                       | PBX3;PBX3;PBX3;PBX3                |
| cg12218193 | 1  |                       | CROCC1                             |
| cg02114909 | 17 |                       | YWHAE;YWHAE                        |
| cg18319687 | 5  |                       | MIR1229;MGAT4B;MGAT4B              |
| cg09570958 | 17 | rs77690302            | HS3ST3B1;MGC12916                  |
| cg01068014 | 13 |                       | MIR17HG;MIR17HG                    |
| cg19978242 | 10 |                       | INPP5F;INPP5F                      |
| cg07148743 | 5  | rs77141166 rs35581525 | BRD9;BRD9;BRD9                     |
| cg27567880 | 18 |                       | MBD2;SNORA37;MBD2                  |
| cg13974505 | 9  |                       | LOC389705                          |
| cg07830110 | 22 |                       | LOC400927                          |
| cg13360150 | 11 |                       | LIN7C;BDNFOS                       |
| cg03151540 | 4  |                       | TAPT1;FLJ39653;FLJ39653            |
| cg24005950 | 16 |                       | SNORA10;RPS2                       |
| cg25531857 | 20 | rs8590                | C20orf199;C20orf199;C20orf199      |
| cg18672602 | 3  | rs2636939             | LOC220729                          |
| cg16744883 | 8  |                       | FAM66B                             |
| cg27061903 | 6  |                       | COX7A2;COX7A2                      |
| cg12312819 | 2  | rs3977003 rs2592451   | CBWD2;LOC440839                    |
| cg05778739 | 2  |                       | LOC729234                          |
| cg14278808 | 8  | rs75492345            | LOC157627;MIR124-1                 |
| cg07291923 | 2  | rs75602512            | BRE;BRE;BRE;BRE;BRE;RBKS;LOC100    |
| cg03183345 | 11 | rs74901138            | TBRG1;TBRG1                        |
| cg23083277 | 3  |                       | COL29A1;COL29A1                    |
| cg04278444 | 15 |                       | SNORD115-15;SNORD115-21;PAR4;S     |
| cg18334734 | 5  |                       | LOC645323                          |
| cg04385236 | 3  |                       | C3orf55;C3orf55;C3orf55;C3orf55;C  |
| cg12960248 | 16 |                       | GFOD2;GFOD2;GFOD2                  |

|            |    |            |                                   |
|------------|----|------------|-----------------------------------|
| cg02979839 | 5  |            | FAM193B;FAM193B                   |
| cg02525307 | 20 | rs73353672 | LOC100134868                      |
| cg04250926 | 1  |            | CRYZ;CRYZ;TYW3;CRYZ;TYW3;CRYZ;T   |
| cg20804661 | 11 |            | LOC100133315;RNF121;RNF121;RNI    |
| cg00556742 | 2  |            | C2orf60;C2orf60;C2orf47           |
| cg08288469 | 12 |            | HNRPA1L-2;HNRNPA1;HNRNPA1;CB      |
| cg10430690 | 3  |            | KALRN;KALRN;KALRN;KALRN;KALRN     |
| cg00859352 | 3  |            | TNIK;TNIK;TNIK;TNIK;TNIK;TNIK;TNI |
| cg06333167 | 2  |            | PRKRA;DFNB59;PRKRA;PRKRA;MIR5-    |
| cg08634133 | 7  |            | ATP6V0E2;LOC401431;ATP6V0E2;AT    |
| cg26359174 | 2  |            | UGGT1;UGGT1                       |
| cg25214792 | 22 |            | P2RX6;P2RX6;MGC16703              |
| cg06872010 | 8  |            | FAM66A                            |
| cg13838528 | 11 |            | RPL27A;SNORA3                     |
| cg00678361 | 8  |            | C8ORFK29                          |
| cg23029801 | 22 |            | DGCR5                             |
| cg09039664 | 20 |            | DBNDD2;DBNDD2;SYS1-DBNDD2;DE      |
| cg14158407 | 7  |            | LOC401397;LOC401397               |
| cg13857186 | 9  |            | C9orf43;POLE3;C9orf43;POLE3       |
| cg04122568 | 5  | rs1060613  | LOC100129716;ARRDC3               |
| cg14244648 | 12 | rs4767067  | C12orf47;MAPKAPK5;MAPKAPK5        |
| cg23685650 | 14 | rs79849469 | KTN1;C14orf33;KTN1;KTN1;KTN1      |
| cg10661904 | 17 | rs7406828  | PDE6G;PDE6G                       |
| cg10154310 | 7  |            | SSBP1;FLJ40852                    |
| cg09458394 | 1  |            | SNORD45C;RABGGTB                  |
| cg08085357 | 3  |            | SOX2OT                            |
| cg04221355 | 2  |            | BRE;RBKS;BRE;BRE;BRE;BRE;LOC100   |
| cg27248887 | 2  | rs11689362 | EEF1B2;EEF1B2;SNORD51;NDUFS1;E    |
| cg22732432 | 12 | rs34470343 | LOC400027                         |
| cg13131095 | 2  |            | MYCN;MYCNOS                       |
| cg08252387 | 5  | rs34698314 | LOC645323;LOC645323               |
| cg19751897 | 1  |            | TXNDC12;TXNDC12;BTF3L4;BTF3L4;I   |
| cg00354542 | 16 | rs56687322 | LOC100134368                      |
| cg02484633 | 6  |            | C6orf227                          |
| cg24082174 | 3  |            | SNORA63;MIR1248;EIF4A2;SNORA8     |
| cg11598872 | 17 |            | FLJ45079                          |
| cg07720160 | 6  | rs75519604 | HLA-L                             |
| cg05374451 | 17 |            | FLJ90757;BAIAP2;BAIAP2;BAIAP2;BA  |
| cg03479278 | 7  |            | BCAP29;BCAP29                     |
| cg12885549 | 2  |            | MIR548N                           |
| cg00960395 | 17 |            | PRAC;C17orf93                     |
| cg01299854 | 22 |            | PI4KAP2                           |
| cg25951256 | 10 |            | HSD17B7P2                         |
| cg01191395 | 17 |            | SHBG;SAT2;SHBG;SAT2               |



|            |    |            |                                  |
|------------|----|------------|----------------------------------|
| cg13413996 | 9  |            | ADAMTS13;ADAMTS13;ADAMTS13;      |
| cg08685077 | 7  |            | NT5C3;NT5C3                      |
| cg04156464 | 16 |            | GNAO1;GNAO1;LOC283856            |
| cg01332827 | 20 |            | EDEM2;EDEM2;EDEM2                |
| cg16740905 | 19 |            | SEC1;DBP                         |
| cg04600299 | 7  |            | ATP6V0E2;LOC401431;ATP6V0E2;AT   |
| cg00103783 | 17 |            | MPDU1;MPDU1                      |
| cg23257859 | 7  | rs2923266  | MIR550-2                         |
| cg24775832 | 6  | rs9360898  | COX7A2;COX7A2                    |
| cg14305763 | 2  |            | BRE;RBKS;BRE;BRE;BRE;BRE;LOC100  |
| cg05323345 | 11 |            | IGF2AS;INS-IGF2;IGF2;IGF2;IGF2AS |
| cg20694303 | 4  |            | LOC348926                        |
| cg11142248 | 14 |            | FLJ43390                         |
| cg19956605 | 22 |            | UBE2L3;UBE2L3;UBE2L3             |
| cg22838281 | 11 |            | TMEM138;TMEM138                  |
| cg07236884 | 12 |            | MIR614                           |
| cg15666516 | 19 |            | RPS11;SNORD35B                   |
| cg02719245 | 14 |            | FLJ45244;DICER1                  |
| cg21142158 | 13 |            | COG6;COG6;COG6                   |
| cg18393046 | 17 |            | MSX2P1                           |
| cg16948320 | 3  | rs13097486 | HRASLS;MGC2889                   |
| cg25504988 | 6  | rs17194824 | TRIM39;HCG18;HCG18               |
| cg17819420 | 19 |            | LOC100131801;LOC100131801;XAB:   |
| cg25976804 | 22 |            | AIFM3;AIFM3;AIFM3;AIFM3;LZTR1    |
| cg16850687 | 18 |            | DLGAP1;FLJ35776;DLGAP1           |
| cg17819520 | 5  |            | NCRNA00219;SNORA13               |
| cg14059830 | 9  | rs62578961 | C9orf45                          |
| cg17747171 | 20 |            | NOP56;NOP56;SNORD110             |
| cg00106420 | 12 |            | DIABLO;DIABLO;DIABLO;DIABLO      |
| cg19631845 | 7  |            | ZNF138;ZNF138;ZNF138;ZNF138      |
| cg02318516 | 18 |            | LOC400657                        |
| cg27586255 | 7  |            | SDK1;SDK1                        |
| cg09275980 | 15 |            | SNORD116-29                      |
| cg01531665 | 9  |            | NOL6;SUGT1P1;NOL6                |
| cg27607898 | 6  |            | PECI;PECI;PECI;PECI              |
| cg06579192 | 19 | rs75508674 | C19orf56;MORG1;MORG1;MORG1;(     |
| cg03747177 | 16 |            | EARS2;EARS2;UBFD1;EARS2          |
| cg27599211 | 12 |            | TESC;TESC;TESC                   |
| cg06194119 | 2  |            | TMEM185B                         |
| cg11955373 | 2  |            | TTC31;TTC31;CCDC142              |
| cg05795849 | 3  | rs1866997  | ITPR1;ITPR1;ITPR1;EGOT           |
| cg23287902 | 2  |            | LMAN2L;LMAN2L;LMAN2L;LMAN2L;     |
| cg03719693 | 4  |            | LOC641518;LOC641518              |
| cg02690648 | 8  |            | PINX1;MIR1322                    |

|            |    |            |                                  |
|------------|----|------------|----------------------------------|
| cg04145065 | 4  |            | N4BP2;LOC344967                  |
| cg13272108 | 20 |            | NOP56;SNORD110;NOP56;SNORA51     |
| cg01517832 | 11 |            | TOLLIP;LOC255512                 |
| cg20152539 | 17 |            | HS3ST3B1;MGC12916                |
| cg00982136 | 2  |            | CLK1;CLK1;CLK1;CLK1              |
| cg00040423 | 6  |            | TRIM39;HCG18;HCG18;TRIM39        |
| cg15369601 | 15 |            | ADPGK;ADPGK;ADPGK                |
| cg27370696 | 6  | rs57301060 | AGPAT1;RNF5;RNF5P1               |
| cg16278716 | 3  |            | KALRN;KALRN;KALRN;KALRN;KALRN    |
| cg10149336 | 16 | rs34142986 | EARS2;EARS2                      |
| cg14534967 | 7  |            | ABHD11;ABHD11;ABHD11;ABHD11;     |
| cg17597639 | 5  |            | SDHAP3                           |
| cg12265892 | 19 |            | LOC100134317                     |
| cg00404641 | 3  |            | NUDT16P;NUDT16P                  |
| cg20550790 | 5  |            | FLJ42709;FLJ42709;FLJ42709       |
| cg19945937 | 14 |            | MIR665                           |
| cg11168235 | 3  |            | MIR548G;C3orf26                  |
| cg17462140 | 11 |            | IGF2AS;INS-IGF2;IGF2;IGF2AS;IGF2 |
| cg05741161 | 6  |            | LOC285847                        |
| cg25228625 | 17 |            | C17orf44                         |
| cg03778895 | 13 |            | DLEU2                            |
| cg00090787 | 15 |            | RPL4;SNORD16;SNORD18B            |
| cg03113502 | 6  |            | STL                              |
| cg27145044 | 3  |            | RPL32P3                          |
| cg01190037 | 4  |            | C4orf10;MFSD10;MFSD10            |
| cg05512483 | 11 |            | SNORD30;SNORD22;SNORD29;SNOF     |
| cg01899260 | 11 |            | TMEM41B;TMEM41B;TMEM41B          |
| cg17050100 | 2  |            | GPN1;CCDC121;GPN1;CCDC121;GPN    |
| cg03888520 | 22 |            | RRP7B                            |
| cg04500185 | 3  | rs62288198 | LOC100128023                     |
| cg22498840 | 9  |            | MCART1;MCART1;MCART1             |
| cg22394119 | 7  |            | GATS;GATS;GATS;GATS              |
| cg17079757 | 6  |            | DAXX;DAXX;DAXX;DAXX              |
| cg08014499 | 11 |            | IGF2AS;INS-IGF2;IGF2;IGF2;IGF2AS |
| cg12688265 | 1  |            | GBAP1                            |
| cg27168976 | 1  |            | TXNDC12;BTF3L4;BTF3L4;BTF3L4     |
| cg24931632 | 1  |            | MGC12982                         |
| cg02871659 | 16 |            | SNHG9;SNORA64;SNORA78;RPS2       |
| cg17875611 | 3  |            | SNORA7A;RPL32;RPL32;RPL32        |
| cg15883181 | 17 |            | RNF213;LOC100294362              |
| cg09933836 | 8  |            | C8orf75                          |
| cg05627663 | 7  |            | SNORA22;CCT6P1                   |
| cg09007244 | 22 |            | RPL23AP82;RABL2B;RABL2B;RABL2E   |
| cg21722785 | 17 |            | C17orf44                         |

|            |    |            |                                    |
|------------|----|------------|------------------------------------|
| cg04296434 | 20 |            | TMEM189;TMEM189-UBE2V1;TMEM        |
| cg05348535 | 20 |            | HSPC072;LOC100270804;HSPC072       |
| cg17526424 | 20 |            | SNHG11                             |
| cg01033175 | 3  |            | ZBTB11;LOC100009676                |
| cg19573567 | 10 |            | ACTA2;FAS;FAS;FAS;FAS;FAS;FAS;FA   |
| cg19231290 | 10 |            | KLF6;KLF6;KLF6;KLF6;KLF6;KLF6;KLF6 |
| cg22407942 | 7  | rs3834336  | SNORD93                            |
| cg19088572 | 1  |            | LOC284632                          |
| cg25447652 | 8  |            | TDH                                |
| cg18110419 | 19 |            | FLJ45445                           |
| cg09242901 | 15 | rs1058823  | HERC2P2                            |
| cg04375784 | 6  |            | RPS12;SNORD100;SNORA33             |
| cg02395779 | 3  |            | ZBTB11;LOC100009676                |
| cg10806562 | 17 |            | FLJ40504                           |
| cg25640176 | 16 |            | GFOD2;GFOD2;GFOD2                  |
| cg24936032 | 5  |            | HINT1;HINT1;HINT1                  |
| cg20672430 | 6  |            | DAXX;DAXX;DAXX;DAXX                |
| cg15119375 | 16 |            | C16orf67                           |
| cg04768630 | 22 |            | TOM1;TOM1;TOM1;TOM1;TOM1;TOM1;TOM1 |
| cg16383389 | 1  |            | MIR760                             |
| cg07052796 | 10 |            | ASB13;ASB13                        |
| cg00039016 | 16 | rs60257999 | FBXO31                             |
| cg05727186 | 17 | rs631440   | MGC57346;MGC57346                  |
| cg23620822 | 3  |            | LOC285375                          |
| cg06760162 | 17 |            | FLJ35220;FLJ35220;FLJ35220;LOC10   |
| cg05804598 | 15 | rs1058828  | HERC2P2                            |
| cg25851152 | 10 |            | MIR146B                            |
| cg08972632 | 16 |            | LOC283922                          |
| cg00323100 | 4  |            | N4BP2;LOC344967                    |
| cg25211938 | 22 |            | PANX2;PANX2;PANX2                  |
| cg16278124 | 1  |            | CCNL2;CCNL2;CCNL2;LOC148413;CC     |
| cg05865670 | 22 |            | THAP7;THAP7;FLJ39582;FLJ39582      |
| cg03230852 | 20 |            | LOC647979                          |
| cg01067809 | 6  |            | DOM3Z;STK19;STK19;STK19            |
| cg12624825 | 9  |            | LOC100128076                       |
| cg09791459 | 16 |            | GFOD2;GFOD2;GFOD2                  |
| cg20184247 | 17 | rs4395118  | LOC404266;LOC404266;LOC404266;     |
| cg15145341 | 13 | rs79470870 | LOC646405                          |
| cg02824291 | 7  |            | PAXIP1;LOC202781                   |
| cg16567044 | 14 |            | MEG3;MEG3;MEG3                     |
| cg13258700 | 7  |            | C7orf13;RNF32                      |
| cg00459975 | 8  |            | INTS9;INTS9;HMBOX1;INTS9;HMBOX1    |
| cg25446612 | 2  |            | PP14571;GPC1                       |
| cg18042632 | 21 |            | C21orf130                          |

|            |    |            |                                  |
|------------|----|------------|----------------------------------|
| cg15204036 | 4  |            | AGXT2L1;AGXT2L1;AGXT2L1;AGXT2L1  |
| cg09538129 | 7  |            | MIR25;MCM7;MCM7;MIR106B;MIR      |
| cg06216926 | 14 |            | ATXN3;ATXN3;ATXN3;ATXN3;ATXN3    |
| cg26106778 | 6  |            | RING1;MIR219-1                   |
| cg19658046 | 5  |            | FAM193B;FAM193B                  |
| cg23797424 | 12 |            | LOC642846                        |
| cg13253729 | 22 |            | LOC91316;RGL4                    |
| cg26804995 | 13 |            | TFDP1;TFDP1                      |
| cg26813301 | 16 |            | LOC652276                        |
| cg15539395 | 19 |            | MGC2752                          |
| cg19646028 | 19 |            | MIR7-3;C19orf30                  |
| cg11053740 | 14 | rs36066039 | RAB2B;TOX4;RAB2B;RAB2B           |
| cg11094161 | 14 |            | MUDENG;EXOC5;MUDENG              |
| cg09091424 | 11 |            | ANKRD13D;ANKRD13D                |
| cg17353431 | 22 | rs370030   | FLJ39582;THAP7;FLJ39582;THAP7    |
| cg26212163 | 5  |            | LOC134466                        |
| cg02697500 | 2  |            | CLASP1;CLASP1;CLASP1;RNU4ATAC    |
| cg00996986 | 22 |            | SERHL                            |
| cg18963800 | 10 |            | HSD17B7P2                        |
| cg05640342 | 11 |            | LOC494141;LOC494141;LOC494141    |
| cg04143736 | 4  |            | MGC45800                         |
| cg26074723 | 7  |            | RPS2P32                          |
| cg04328701 | 17 |            | FAM134C;FAM134C;TUBG1            |
| cg08258539 | 8  |            | C8orf51;RHPN1                    |
| cg21199854 | 3  |            | GNL3;GNL3;GNL3;SNORD19B          |
| cg26403608 | 17 |            | LOC284009;METT10D                |
| cg15583349 | 6  |            | DAXX;DAXX;DAXX;DAXX              |
| cg15212137 | 19 |            | MIR519A1                         |
| cg11553721 | 13 |            | TFDP1;TFDP1                      |
| cg06808967 | 3  |            | ACAA1;ACAA1;MYD88;ACAA1          |
| cg15474754 | 4  |            | HPGD;HPGD;HPGD                   |
| cg20737712 | 11 | rs529083   | TBRG1;TBRG1;TBRG1                |
| cg09507884 | 11 |            | LOC100130987                     |
| cg22175052 | 5  | rs11540179 | SNORD95;GNB2L1;GNB2L1            |
| cg01940867 | 16 |            | TMEM8A;LOC100134368              |
| cg04662010 | 2  |            | MTX2;MTX2                        |
| cg13505469 | 10 | rs7095041  | LOC219347;LOC219347;C10orf57;LC  |
| cg00735591 | 19 |            | DNM2;DNM2;DNM2;DNM2;MIR638       |
| cg10763638 | 17 |            | FLJ35220;FLJ35220;FLJ35220;LOC10 |
| cg01243544 | 1  |            | LOC100130093;LOC100130093        |
| cg12992112 | 6  | rs2028973  | CMAH;CMAH                        |
| cg17605235 | 9  |            | ANKRD18A;C9orf122                |
| cg02844341 | 7  |            | ST7OT4;ST7OT1;ST7;ST7            |
| cg13130934 | 15 |            | SNORD115-21;SNORD115-20;SNORI    |

|            |    |                    |                                    |
|------------|----|--------------------|------------------------------------|
| cg13587740 | 15 | rs1800428          | HEXA;C15orf34                      |
| cg11915671 | 19 |                    | TUBB4;MIR220B                      |
| cg14732828 | 3  |                    | FYTTD1;KIAA0226;KIAA0226;FYTTD1    |
| cg00506354 | 3  |                    | ALG3;ALG3;ALG3;ALG3;ECE2;ECE2      |
| cg00941983 | 6  |                    | TJAP1;TJAP1;TJAP1;TJAP1;TJAP1;TJA  |
| cg25574024 | 11 |                    | IGF2AS;INS-IGF2;IGF2;IGF2;IGF2AS   |
| cg18912560 | 7  |                    | LOC100132832                       |
| cg11787839 | 3  |                    | LMLN;IQCG;LMLN;LMLN;LMLN           |
| cg02807948 | 11 | rs11510            | INS-IGF2;IGF2;IGF2;IGF2            |
| cg25423280 | 15 | rs7174732          | PDIA3;CATSPER2P1                   |
| cg02145916 | 8  |                    | PVT1                               |
| cg19045894 | 2  |                    | ATF2;MIR933                        |
| cg16413842 | 6  |                    | C6orf122;C6orf208                  |
| cg10822545 | 19 |                    | MIR181D;MIR181C                    |
| cg13340272 | 11 |                    | GUCY2E                             |
| cg08946731 | 7  | rs56664420         | RP9P                               |
| cg12029507 | 7  | rs5026069          | RNF216L;RNF216L;RNF216L            |
| cg03894789 | 5  |                    | MIR874;KLHL3                       |
| cg06850285 | 22 | rs140489 rs5998522 | UBE2L3;UBE2L3;UBE2L3               |
| cg00614969 | 17 |                    | SNORA76;SNORD104                   |
| cg25695041 | 4  |                    | UBA6;LOC550112                     |
| cg17833341 | 1  |                    | SHC1;SHC1;CKS1B;CKS1B              |
| cg26271690 | 1  | rs16850674         | LOC148709                          |
| cg22793458 | 3  |                    | ZBTB11;LOC100009676                |
| cg05941212 | 1  | rs7418389          | MIB2;MIB2;MIB2;MIB2;MIB2;MIB2      |
| cg15982308 | 6  |                    | RNF5P1;RNF5;AGPAT1;AGPAT1          |
| cg01612476 | 22 |                    | MIAT                               |
| cg08484337 | 6  |                    | SNORA38;BAT2                       |
| cg10608004 | 19 |                    | RPL13AP5;RPL13A                    |
| cg25255679 | 8  |                    | RHPN1;C8orf51                      |
| cg05659741 | 1  |                    | HIST2H2BA                          |
| cg18353837 | 14 |                    | C14orf132                          |
| cg06618047 | 16 |                    | LOC146336                          |
| cg11080530 | 14 |                    | RAB2B;RAB2B;TOX4;RAB2B             |
| cg03791497 | 17 |                    | TMEM11;TMEM11                      |
| cg19273756 | 17 |                    | SKA2;SKA2;MIR301A                  |
| cg09393453 | 19 |                    | MIR517B;MIR520G                    |
| cg04030905 | 17 |                    | SHBG;SHBG;SAT2                     |
| cg16285215 | 12 |                    | FAM60A;FLJ13224;FAM60A;FAM60A      |
| cg22453529 | 8  |                    | C8ORF29                            |
| cg26495109 | 16 |                    | LOC283856;GNAO1;GNAO1;GNAO1;       |
| cg09184043 | 7  |                    | ZNF815                             |
| cg13756879 | 11 |                    | INS-IGF2;IGF2AS;IGF2;IGF2;IGF2AS;I |
| cg11604379 | 6  |                    | HCG9                               |

|            |    |            |                                    |
|------------|----|------------|------------------------------------|
| cg11889478 | 19 |            | RDH13;RDH13;RDH13;RDH13            |
| cg08247852 | 8  |            | LOC728024;ERLIN2                   |
| cg06296570 | 7  |            | FLJ43663;FLJ43663                  |
| cg08888916 | 11 |            | SCN4B;SCN4B;SCN4B;SCN4B            |
| cg07201017 | 10 |            | FLJ41350                           |
| cg11904906 | 2  |            | LOC1511174;LOC643387;LOC1511174    |
| cg09169617 | 15 |            | LOC254559                          |
| cg09409435 | 16 |            | PDXDC2                             |
| cg14148088 | 14 |            | MIR494                             |
| cg18586095 | 17 |            | EXOC7;EXOC7;EXOC7;EXOC7;EXOC7      |
| cg15201877 | 1  |            | PTGER3;PTGER3;PTGER3;PTGER3;PT     |
| cg16652639 | 8  |            | TM2D2;ADAM9;TM2D2;ADAM9;TM         |
| cg03594819 | 11 |            | TIMM8B;SDHD;TIMM8B                 |
| cg11111423 | 6  |            | DAXX;DAXX;DAXX;DAXX                |
| cg13575925 | 12 |            | LOC144571                          |
| cg05793193 | 7  |            | LOC100128822                       |
| cg23002708 | 19 | rs34998465 | ATG4D;MIR1238                      |
| cg26916936 | 11 |            | LOC399959;MIR125B1                 |
| cg08261702 | 7  | rs3800784  | LOC728743                          |
| cg01891736 | 16 |            | LITAF;LITAF;LITAF;LITAF            |
| cg22031629 | 22 |            | THAP7;THAP7;FLJ39582;FLJ39582      |
| cg11718707 | 18 |            | MBD2;SNORA37;MBD2                  |
| cg24063120 | 10 |            | FAM178A;FAM178A;FAM178A            |
| cg26577169 | 6  |            | LOC441177;C6orf176;C6orf176        |
| cg03979284 | 3  | rs71325629 | LOC220729                          |
| cg17547708 | 22 |            | LOC100144603;CHKB-CPT1B;CHKB       |
| cg21616552 | 19 |            | LOC148189                          |
| cg02109793 | 22 |            | C22orf45;C22orf45;UPB1             |
| cg13731761 | 11 |            | C11orf21;TSPAN32;C11orf21          |
| cg05913233 | 17 |            | FXR2;SHBG                          |
| cg07613278 | 11 |            | API5;API5;API5;API5                |
| cg25806558 | 4  |            | N4BP2;LOC344967                    |
| cg09154356 | 1  |            | RPS10P7                            |
| cg00476358 | 2  |            | TUBA4A;TUBA4B                      |
| cg08811309 | 5  |            | LOC645323;LOC645323;LOC645323      |
| cg11209892 | 7  |            | LOC286016;TNPO3                    |
| cg21934311 | 17 |            | MSX2P1                             |
| cg20206277 | 21 | rs34699934 | NCRNA00111                         |
| cg07007986 | 14 |            | SERPINA13                          |
| cg25705558 | 15 |            | ISLR2;LOC283731;ISLR2;ISLR2;ISLR2; |
| cg09639631 | 6  | rs259389   | LOC729176;C6orf103                 |
| cg08267319 | 17 |            | LOC92659;MAFG                      |
| cg02580195 | 2  |            | RPL23AP7;RPL23AP7;RPL23AP7;RAB     |
| cg24685761 | 1  |            | SMG5;TMEM79;TMEM79                 |

|            |    |            |                                 |
|------------|----|------------|---------------------------------|
| cg07491444 | 2  | rs1135617  | ARL6IP6;ARL6IP6                 |
| cg11537707 | 1  |            | GAS5;SNORD76;SNORD75;SNORD77    |
| cg24060037 | 1  |            | SERTAD4;C1orf133                |
| cg06750038 | 16 |            | FBXO31;MAP1LC3B                 |
| cg05975219 | 16 | rs2241038  | GAS8;GAS8                       |
| cg05241470 | 15 |            | SLC30A4;C15orf21                |
| cg11621113 | 19 |            | MORG1;MORG1;MAN2B1              |
| cg00944580 | 1  |            | DAB1;MIR548D2                   |
| cg04444086 | 16 | rs2164339  | LOC146336                       |
| cg18484665 | 2  |            | THUMPD2;THUMPD2                 |
| cg00283662 | 19 |            | MIR642;GIPR                     |
| cg13343238 | 15 |            | MIR548H4;GLCE                   |
| cg05340865 | 11 |            | GUCY2E                          |
| cg10062290 | 1  |            | SNORD55;SNORD46;RPS8            |
| cg01551258 | 17 | rs34649800 | RHOT1;ARGFXP2;RHOT1;RHOT1       |
| cg10884908 | 5  |            | PCDHB18                         |
| cg22884857 | 15 |            | PWRN1                           |
| cg03144714 | 12 |            | HOXC4;HOXC5;HOXC5               |
| cg21037184 | 5  | rs6859589  | GPR98;GPR98                     |
| cg24409539 | 2  |            | PAX8;PAX8;PAX8;PAX8;PAX8;LOC441 |
| cg01038149 | 22 |            | P2RX6;P2RX6;MGC16703            |
| cg24642065 | 12 |            | LOC100190940                    |
| cg04160046 | 19 |            | LOC100129935                    |
| cg02371301 | 11 |            | ANO1;ANO1                       |
| cg04103317 | 9  | rs547958   | SUGT1P1;SPINK4                  |
| cg13855261 | 17 |            | HS3ST3B1;MGC12916               |
| cg11235787 | 17 |            | MIR195                          |
| cg01827781 | 16 |            | LOC440356;LOC440356;CDIPT       |
| cg03555433 | 16 |            | GFOD2;GFOD2;GFOD2               |
| cg07423399 | 18 |            | CXADRP3                         |
| cg08629647 | 22 |            | GTSE1;CN5H6.4                   |
| cg01579841 | 6  |            | C6orf176;C6orf176;LOC441177     |
| cg02229841 | 5  | rs1047093  | PPAP2A;PPAP2A;PPAP2A;RNF138P1   |
| cg15364784 | 14 |            | DCAF11;DCAF11;DCAF11;DCAF11;D   |
| cg23954461 | 19 |            | MAN2B1;MORG1;MORG1              |
| cg17025683 | 1  |            | SNORD78;ZBTB37;SNORD75;ZBTB37   |
| cg13811448 | 19 |            | MORG1;MORG1;MAN2B1              |
| cg09914581 | 2  |            | E2F6;E2F6;E2F6;E2F6;E2F6        |
| cg05468584 | 10 |            | MIR202                          |
| cg15703365 | 7  |            | ZNF815                          |
| cg05051957 | 8  | rs58524912 | CHRAC1;CHRAC1                   |
| cg12691651 | 15 |            | ADPGK;ADPGK;ADPGK               |
| cg08820497 | 17 |            | C17orf91;C17orf91;WDR81;C17orf9 |
| cg13440083 | 11 |            | DKFZp686O24166                  |

|            |    |            |                                  |
|------------|----|------------|----------------------------------|
| cg08767710 | 7  |            | ATP6V0E2;LOC401431;ATP6V0E2;AT   |
| cg24196814 | 1  |            | TSNAX-DISC1;TSNAX-DISC1;TSNAX-D  |
| cg01241390 | 5  |            | RNU5E;RNU5D;ZCCHC9;ZCCHC9;ZCC    |
| cg01477908 | 22 |            | GSTTP2                           |
| cg04970106 | 6  |            | HLA-DPB2                         |
| cg06401019 | 5  |            | FAM172A;FAM172A;FAM172A;FAM      |
| cg00938929 | 6  |            | ZNF204P                          |
| cg08460812 | 4  |            | LOC641518;LEF1;LEF1;LEF1;LEF1    |
| cg10844118 | 14 |            | FLJ31306;ARID4A;FLJ31306;ARID4A; |
| cg06097557 | 3  |            | FYTDD1;KIAA0226;FYTDD1;FYTDD1    |
| cg21161173 | 5  |            | VTRNA1-2                         |
| cg14042711 | 19 |            | SAE1;SAE1;SAE1;SAE1              |
| cg13285968 | 2  |            | ZNF385B;MIR1258                  |
| cg08869031 | 15 | rs76137333 | AP3S2;AP3S2                      |
| cg16510548 | 8  |            | LOC401463                        |
| cg19862918 | 17 | rs9898532  | FAM134C;FAM134C;TUBG1;FAM134     |
| cg11967431 | 17 |            | LOC440461                        |
| cg10068793 | 21 |            | C21orf34                         |
| cg12530503 | 15 |            | MIR9-3                           |
| cg16022748 | 4  |            | LOC285456;RPL34;RPL34            |
| cg07560681 | 7  |            | DMTF1;DMTF1;DMTF1;DMTF1;DMT      |
| cg04184179 | 5  |            | MIR874;KLHL3                     |
| cg05382797 | 6  | rs3757333  | ZNRD1;ZNRD1;NCRNA00171           |
| cg18382744 | 5  |            | LOC728411;LOC728411              |
| cg10918927 | 12 | rs985125   | HOXC4;HOXC5;HOXC4;HOXC6;HOXC     |
| cg10159607 | 17 |            | C17orf69;C17orf69                |
| cg10460130 | 2  |            | DTYMK;DTYMK;DTYMK                |
| cg24616828 | 7  |            | MIR96                            |
| cg07364638 | 15 |            | NGRN;NGRN                        |
| cg25246723 | 4  | rs3796935  | LOC285456;RPL34;RPL34            |
| cg17315964 | 5  |            | FAM193B;FAM193B                  |
| cg08508227 | 20 |            | C20orf166;MIR133A2               |
| cg26144265 | 7  |            | BZW2;ANKMY2;BZW2;BZW2            |
| cg13404951 | 12 |            | LOC144742                        |
| cg17054054 | 12 |            | CCDC59;CCDC59;C12orf26           |
| cg02502849 | 2  | rs72969386 | CLASP1;CLASP1;CLASP1;RNU4ATAC    |
| cg17994050 | 6  | rs7770557  | NCRNA00171;ZNRD1;ZNRD1;ZNRD1     |
| cg25764464 | 12 |            | PLEKHA5;PLEKHA5                  |
| cg09955730 | 1  |            | TMED5;TMED5;TMED5;CCDC18         |
| cg17666689 | 10 | rs74143906 | LOC283050;LOC283050;LOC283050    |
| cg19185384 | 13 |            | LOC100190939;TPT1                |
| cg03588221 | 7  |            | MEST;MEST;MESTIT1;MEST           |
| cg16242219 | 14 |            | DIO3OS                           |
| cg04211303 | 6  | rs73414465 | HLA-J;NCRNA00171                 |



|            |    |            |                                    |
|------------|----|------------|------------------------------------|
| cg26152485 | 19 |            | LOC729991-MEF2B;LOC729991-MEF      |
| cg12322132 | 11 |            | IGF2AS;INS-IGF2;IGF2;IGF2AS        |
| cg23905216 | 11 | rs74050127 | INS-IGF2;IGF2AS;IGF2;IGF2;IGF2AS;I |
| cg21599336 | 11 |            | LOC100128239                       |
| cg11031564 | 15 |            | SNORD115-15;SNORD115-21;SNORI      |
| cg00953154 | 7  |            | SNORA9;C7orf40                     |
| cg10002564 | 8  | rs35348043 | HAS2AS;HAS2                        |
| cg05793930 | 1  |            | GSTM4;GSTM4;GSTM4                  |
| cg06686383 | 7  |            | FAM185A;FAM185A;FAM185A            |
| cg14103106 | 19 | rs35193945 | LOC113230                          |
| cg12061113 | 18 |            | LOC100130522;LOC100130522          |
| cg05739816 | 6  |            | C6orf217                           |
| cg03748310 | 8  |            | KIAA1875                           |
| cg11960677 | 1  |            | MTMR9L                             |
| cg10271981 | 19 |            | MIR1181;CDC37                      |
| cg15003194 | 11 |            | LOC100128239                       |
| cg17504698 | 13 | rs9508887  | PSPC1;PSPC1;PSPC1                  |
| cg09958760 | 8  | rs6991968  | TM2D2;TM2D2;ADAM9;ADAM9;TM         |
| cg21024122 | 6  |            | BAT1;SNORD84;BAT1                  |
| cg09422614 | 19 |            | CACNG8;MIR935                      |
| cg06838090 | 6  |            | LOC154449                          |
| cg05732300 | 21 |            | POFUT2;POFUT2;LOC642852;POFUT      |
| cg09122458 | 10 |            | BMS1P4                             |
| cg25762195 | 8  |            | RHPN1;C8orf51                      |
| cg17093877 | 17 | rs80007821 | MGC16275                           |
| cg20618109 | 6  |            | DAXX;DAXX;ZBTB22;DAXX;DAXX         |
| cg01020987 | 1  |            | C1orf174;LOC100133612              |
| cg00161450 | 2  | rs2422001  | LOC388955                          |
| cg04299389 | 20 |            | LOC284798;LOC284798;LOC284798      |
| cg05721281 | 3  |            | FYTTD1;FYTTD1;FYTTD1;KIAA0226      |
| cg12991050 | 5  |            | LOC645323                          |
| cg24210813 | 17 |            | LOC404266;LOC404266;LOC404266;     |
| cg11881599 | 12 |            | CLLU1OS;CLLU1;CLLU1                |
| cg24466873 | 4  |            | NBLA00301                          |
| cg03440944 | 7  |            | C7orf40                            |
| cg01109243 | 16 |            | NDE1;MIR484;KIAA0430               |
| cg16513467 | 10 |            | WAC;WAC;WAC;WAC;WAC                |
| cg25890582 | 10 |            | ZNF487                             |
| cg22575379 | 3  |            | NUDT16P;NUDT16P                    |
| cg20659378 | 11 |            | RNF121;LOC100133315;RNF121;RNI     |
| cg01680573 | 19 |            | LOC729991-MEF2B;MEF2B;LOC7299      |
| cg02772682 | 19 |            | SNAPC2;SNAPC2                      |
| cg02924425 | 18 |            | LOC100130522;LOC100130522;PARI     |
| cg21184629 | 9  |            | C9orf122;ANKRD18A                  |

|            |    |                      |                                  |
|------------|----|----------------------|----------------------------------|
| cg00581541 | 1  |                      | SNORD103A;PUM1;PUM1              |
| cg25391820 | 5  |                      | MATR3;SNHG4                      |
| cg19823971 | 1  |                      | PUM1;SNORD103A;PUM1              |
| cg03317826 | 2  |                      | CCT7;CCT7;CCT7;CCT7;CCT7;C2orf7; |
| cg07439975 | 6  |                      | STL                              |
| cg00753676 | 4  |                      | FLJ13197                         |
| cg09895527 | 16 |                      | NUDT7;NUDT7                      |
| cg11137578 | 5  |                      | RNU5E;RNU5D;ACOT12               |
| cg00491180 | 16 | rs77261105           | TMPRSS8                          |
| cg24825482 | 5  |                      | NCRNA00219;SNORA13               |
| cg21565150 | 10 |                      | FAS;FAS;FAS;FAS;FAS;ACTA2;ACTA2; |
| cg01869750 | 5  |                      | TRIM23;C5orf44;TRIM23;C5orf44;TF |
| cg08981282 | 16 |                      | LOC652276                        |
| cg05679027 | 9  |                      | HIATL2                           |
| cg16483916 | 19 | rs77608060           | PLAC2                            |
| cg13791131 | 11 |                      | IGF2AS;INS-IGF2;IGF2;IGF2;IGF2AS |
| cg00219543 | 6  |                      | C6orf122;C6orf208                |
| cg23214285 | 7  |                      | BZW2;ANKMY2;BZW2;BZW2            |
| cg09638003 | 15 |                      | SNORD115-4                       |
| cg02662576 | 14 |                      | MIR495                           |
| cg26949796 | 14 |                      | CFL2;CFL2;CFL2;CFL2;CFL2         |
| cg00375691 | 10 |                      | EMX2OS                           |
| cg03387256 | 10 |                      | FAS;FAS;FAS;FAS;FAS;ACTA2;ACTA2; |
| cg14373189 | 6  | rs3130059            | BAT1;SNORD84;BAT1                |
| cg01656221 | 2  |                      | MIR548N                          |
| cg27283993 | 10 | rs2388864            | KLF6;KLF6;KLF6;KLF6              |
| cg06746360 | 17 |                      | RPL23A;SNORD42B                  |
| cg00467529 | 11 | rs10892202           | IL10RA;IL10RA                    |
| cg16630982 | 17 | rs8176075 rs35436937 | BRCA1;BRCA1;BRCA1;BRCA1;BRCA1    |
| cg13075363 | 3  |                      | KPNA1;KPNA1                      |
| cg18645493 | 1  |                      | MIR190B                          |
| cg23636419 | 16 |                      | MAP1LC3B;FBXO31                  |
| cg27043582 | 8  |                      | HOOK3;RNF170;RNF170;RNF170;RN    |
| cg02287710 | 14 |                      | DIO3;MIR1247                     |
| cg07343367 | 7  |                      | LSM5;LSM5;LSM5;LSM5              |
| cg03505995 | 14 |                      | C14orf23;C14orf23                |
| cg02086493 | 17 |                      | LOC404266;LOC404266;LOC404266;   |
| cg03700287 | 5  |                      | PCDHB19P                         |
| cg19275050 | 8  |                      | HAS2;HAS2AS;HAS2                 |
| cg06235973 | 19 |                      | LOC113230                        |
| cg12346673 | 10 |                      | LOC399815;FAM24B                 |
| cg26591684 | 7  | rs7789911            | ZNF783                           |
| cg18273501 | 10 |                      | CALHM2;CALHM2;CALHM2             |
| cg16652462 | 17 |                      | LOC644172                        |

|            |    |            |                                    |
|------------|----|------------|------------------------------------|
| cg01717517 | 15 | rs3958545  | DNM1P35                            |
| cg13965908 | 11 |            | PPFIA1;PPFIA1;MIR548K              |
| cg23050873 | 2  | rs3792109  | ATG16L1;ATG16L1;SCARNA5            |
| cg02399652 | 3  |            | LOC100128164;LOC100128164;SEC6     |
| cg12254291 | 6  |            | C6orf176;C6orf176;LOC441177        |
| cg03372852 | 19 |            | LILRP2                             |
| cg03794862 | 7  |            | WNT2;WNT2                          |
| cg13112154 | 10 |            | FLJ41350                           |
| cg20612559 | 17 |            | LOC100306951;INPP5K;INPP5K;INPF    |
| cg00726786 | 2  |            | MTERFD2;MTERFD2;MTERFD2;MTEI       |
| cg24900244 | 12 |            | DIABLO;DIABLO;DIABLO;DIABLO        |
| cg21063758 | 15 |            | ISLR2;ISLR2;LOC283731;ISLR2;ISLR2; |
| cg03420356 | 6  |            | LOC730101;LOC730101                |
| cg09976774 | 12 | rs12425068 | FOXN1;FOXN1;C12orf32;C12orf32;     |
| cg15236196 | 17 |            | FLJ32065                           |
| cg05665136 | 5  |            | TRIM23;C5orf44;TRIM23;TRIM23;C5    |
| cg14126688 | 17 |            | LOC404266;LOC404266;LOC404266;     |
| cg01044849 | 6  |            | NCRNA00171                         |
| cg06150369 | 3  | rs62266955 | RPL32P3                            |
| cg21643217 | 7  |            | SDK1;SDK1                          |
| cg23278066 | 11 |            | C11orf73;C11orf73;C11orf73;C11orf  |
| cg14477135 | 3  |            | LOC100128164;SEC62;LOC10012816     |
| cg01514668 | 11 |            | MIR129-2                           |
| cg10756578 | 16 |            | MTHFSD;MTHFSD;MTHFSD;MTHFSD        |
| cg05016401 | 16 |            | LOC440356;LOC440356;CDIPT          |
| cg06014227 | 12 |            | RPL13AP20                          |
| cg09484214 | 19 |            | MIR372;MIR373                      |
| cg19098268 | 19 |            | ZIM2;ZIM2;PEG3;PEG3;PEG3;PEG3;     |
| cg01773692 | 22 |            | GTSE1;CN5H6.4                      |
| cg17212073 | 17 |            | LOC284023                          |
| cg09963123 | 4  |            | FLJ13197;KLF3                      |
| cg06611310 | 2  |            | KLRAQ1;KLRAQ1;KLRAQ1;KLRAQ1        |
| cg11845785 | 2  |            | LOC150568                          |
| cg07660236 | 6  |            | ZSCAN12;ZSCAN12                    |
| cg07639783 | 7  |            | PSMG3;KIAA1908;KIAA1908;KIAA19     |
| cg02197629 | 21 | rs76309452 | C21orf81                           |
| cg02132760 | 11 |            | LDHA;LDHA;LDHA;LDHA;LDHA;LDHA      |
| cg03689456 | 12 |            | HNRNPA1;HNRNPA1L-2;HNRNPA1;CB      |
| cg13461273 | 3  |            | ZNF620;ZNF620                      |
| cg06738169 | 19 |            | POP4;POP4                          |
| cg14780004 | 12 |            | NCRNA00173;NCRNA00173              |
| cg05158692 | 17 |            | PLEKHM1;PLEKHM1;PLEKHM1            |
| cg01606998 | 22 |            | PANX2;PANX2;PANX2                  |
| cg00911551 | 12 |            | NECAP1;NECAP1                      |

|            |    |            |                                |
|------------|----|------------|--------------------------------|
| cg09743375 | 15 | rs55653836 | JMJD7;JMJD7-PLA2G4B;JMJD7-PLA2 |
| cg26624726 | 12 | rs57594211 | NUDT4;NUDT4;NUDT4P1            |
| cg10486879 | 11 |            | NCRNA00167;PRDM10;PRDM10       |
| cg02486253 | 17 |            | RNF126P1                       |
| cg03606774 | 2  |            | SLC5A6;SLC5A6                  |
| cg04251368 | 11 |            | KCNQ1DN                        |
| cg15057250 | 1  | rs35435329 | LOC728448                      |
| cg19165105 | 1  |            | LOC647121                      |
| cg01807919 | 17 |            | SHBG;FXR2                      |
| cg18934293 | 7  | rs79538994 | MEST;MEST;MEST;MESTIT1         |
| cg07935727 | 4  | rs79508665 | LOC340017                      |
| cg09010812 | 16 | rs13336336 | CENPBD1;AFG3L1;CENPBD1;AFG3L1  |
| cg06136185 | 17 |            | LOC388428;AATK                 |
| cg18365211 | 4  | rs62636595 | AFAP1;AFAP1;LOC84740           |
| cg06108374 | 8  | rs74523900 | CSGALNACT1;CSGALNACT1;CSGALN.  |
| cg09276355 | 13 |            | C13orf1;C13orf1;C13orf1        |
| cg16937057 | 7  |            | ST7;ST7OT4;ST7OT1;ST7          |
| cg14306451 | 5  | rs77101434 | BASP1;LOC285696                |
| cg09429153 | 9  | rs74704804 | PBX3;PBX3;PBX3;PBX3            |
| cg13927290 | 15 | rs364085   | GOLGA6L5                       |
| cg25936922 | 2  |            | C2orf60;C2orf60;C2orf47        |
| cg04552737 | 2  |            | GLB1L;STK16;STK16              |
| cg10916494 | 6  |            | SNHG5;SNORD50B;SNORD50A        |
| cg12320676 | 2  |            | E2F6;E2F6;E2F6;E2F6;E2F6       |
| cg20011833 | 6  |            | LYRM2;LYRM2;LYRM2;LYRM2        |
| cg09341448 | 19 |            | SEC1                           |
| cg06964756 | 17 |            | RAB34;RAB34;SNORD42B;RAB34;RP  |
| cg09099312 | 7  |            | Sep-13                         |
| cg03143365 | 19 |            | MAN2B1;MORG1;MORG1             |
| cg15015416 | 10 |            | FRMPD2;FRMPD2;FRMPD2L1;FRMP    |
| cg23659044 | 9  | rs62581042 | TUBBP5                         |
| cg25105745 | 1  |            | MIR197                         |
| cg19866040 | 11 | rs35925287 | HCCA2;KRTAP5-2;LOC338651       |
| cg06784232 | 8  |            | CSGALNACT1;CSGALNACT1          |
| cg20847110 | 4  | rs34614751 | LOC401127                      |
| cg05249271 | 14 |            | MIR496;MIR154                  |
| cg01717031 | 15 | rs397530   | HERC2P2                        |
| cg01813761 | 14 |            | PARP2;PARP2;RPPH1              |
| cg19539667 | 17 |            | LOC100133991;LOC100133991;C17c |
| cg06023161 | 6  |            | SNORA38;BAT2                   |
| cg12615982 | 3  |            | TERC                           |
| cg06942685 | 19 |            | ZNF542;ZNF542;ZNF542;ZNF542    |
| cg07064066 | 21 | rs74397289 | DSCR8;DSCR8;DSCR8;DSCR4;DSCR4; |
| cg01769968 | 1  |            | SNORA42;KIAA0907               |

|            |    |            |                                 |
|------------|----|------------|---------------------------------|
| cg01787047 | 11 |            | LOC100130987;RAD9A              |
| cg25356214 | 12 |            | POU6F1                          |
| cg12967093 | 2  |            | DIRC3                           |
| cg27386837 | 1  |            | NFYC;NFYC;NFYC;LOC100130557;NF  |
| cg10470963 | 22 |            | ANKRD54;MIR658                  |
| cg04036898 | 1  |            | POMGNT1;POMGNT1                 |
| cg00594560 | 8  |            | ZFHX4;LOC100192378              |
| cg13081644 | 1  |            | TMEM51;TMEM51;C1orf126;TMEM     |
| cg26508537 | 10 | rs62621207 | FAM178A;FAM178A;FAM178A         |
| cg18499530 | 3  |            | FYTTD1;KIAA0226;FYTTD1;FYTTD1   |
| cg05562080 | 4  | rs2927269  | KLF3;FLJ13197                   |
| cg12374775 | 15 |            | SCAND2;SCAND2                   |
| cg10153335 | 17 |            | LOC404266;LOC404266;LOC404266;  |
| cg21545390 | 7  |            | DLX6AS                          |
| cg16251399 | 6  |            | GUSBL2                          |
| cg27293016 | 10 |            | LOC219347;LOC219347;C10orf57;LC |
| cg27048959 | 17 |            | SNORD1C                         |
| cg05858136 | 12 |            | ALKBH2;ALKBH2;ALKBH2;ALKBH2;AI  |
| cg01077764 | 3  |            | LOC285375                       |
| cg21550360 | 15 |            | ADPGK;ADPGK;ADPGK               |
| cg07745418 | 19 | rs73934853 | ZNF83                           |
| cg25860143 | 6  | rs28832872 | HLA-DRB6                        |
| cg06237697 | 17 |            | MIR365-2                        |
| cg14124066 | 9  |            | RBM18;RBM18;RBM18               |
| cg19826864 | 10 |            | ZNF438;ZNF438;ZNF438;ZNF438;ZN  |
| cg01986205 | 4  |            | KLF3;FLJ13197                   |
| cg02402630 | 16 |            | LOC100129637                    |
| cg02756451 | 7  |            | LOC100133091                    |
| cg10044179 | 21 |            | C21orf81                        |
| cg00023174 | 19 |            | ZNF788                          |
| cg18384960 | 14 |            | MIR299;MIR411                   |
| cg22530053 | 3  | rs35095647 | SOX2OT;SOX2                     |
| cg00845626 | 3  |            | GNL3;GNL3;GNL3;SNORD69          |
| cg12977686 | 17 |            | SNORA76;SNORD104                |
| cg02276831 | 9  |            | LOC158381;LOC158381             |
| cg14198101 | 19 |            | CIRBP;C19orf23;CIRBP;CIRBP      |
| cg04320595 | 12 | rs73278987 | RACGAP1P                        |
| cg03889876 | 1  |            | EFCAB2;EFCAB2;EFCAB2;EFCAB2;EF  |
| cg05541640 | 3  |            | ABHD14B;ABHD14B;ABHD14A;ABHD    |
| cg22628064 | 1  | rs4345829  | RPS10P7                         |
| cg10273420 | 10 |            | ZNF487                          |
| cg00630781 | 6  |            | RGL2;RGL2                       |
| cg06954720 | 6  | rs57583084 | HLA-DRB6                        |
| cg27353919 | 3  |            | IP6K2;IP6K2;IP6K2;IP6K2;IP6K    |

|            |    |            |                                     |
|------------|----|------------|-------------------------------------|
| cg17226584 | 7  |            | FLJ43663;FLJ43663                   |
| cg16907514 | 14 |            | KTN1;C14orf33;KTN1;KTN1;KTN1        |
| cg13870510 | 7  |            | INTS4L1                             |
| cg19160209 | 11 | rs7105138  | C11orf73;C11orf73;C11orf73;C11orf73 |
| cg24265610 | 10 |            | FLJ41350;LBX1                       |
| cg12938003 | 4  |            | LOC641518;LOC641518                 |
| cg20041381 | 1  |            | C1orf27;C1orf27;MIR548F1;C1orf27    |
| cg27131176 | 22 |            | C22orf26;LOC150381                  |
| cg14946299 | 7  |            | ZNF273;ZNF273                       |
| cg03076771 | 20 |            | C20orf24;C20orf24;C20orf24          |
| cg16267491 | 4  |            | LOC256880;H2AFZ                     |
| cg19422019 | 21 |            | C21orf34                            |
| cg08599229 | 7  | rs75917398 | Sep-13                              |
| cg25389463 | 1  |            | RBM34;RBM34;RBM34                   |
| cg21143441 | 17 |            | C17orf44                            |
| cg07894162 | 22 |            | MORC2;TUG1                          |
| cg11919003 | 13 |            | DLEU1;DLEU2                         |
| cg27401698 | 16 |            | LOC283922                           |
| cg02503815 | 7  |            | DPY19L2P2;DPY19L2P2                 |
| cg09980686 | 2  | rs12464121 | C2orf52                             |
| cg02549834 | 19 |            | SEC1;NTN5                           |
| cg01841828 | 16 |            | CHTF8;CHTF8;CHTF8;CHTF8;CIRH1A      |
| cg14503796 | 3  |            | DVWA;CAPN7                          |
| cg01308549 | 21 | rs11911729 | DSCR9                               |
| cg21990144 | 2  |            | CLK1;CLK1;CLK1;CLK1                 |
| cg02771392 | 7  | rs35692753 | ZNF273;ZNF273                       |
| cg00767560 | 19 | rs16996320 | LOC284440                           |
| cg03814063 | 22 |            | C22orf34                            |
| cg01800614 | 6  |            | IFITM4P                             |
| cg13173909 | 2  |            | UGGT1;UGGT1;UGGT1                   |
| cg18170076 | 7  | rs78097622 | POMZP3;LOC100133091;POMZP3          |
| cg08771706 | 11 |            | KCNQ1DN                             |
| cg18197998 | 9  |            | PPP2R4;PPP2R4;PPP2R4;CRAT;CRAT      |
| cg09230350 | 6  | rs3180876  | rs41267110                          |
| cg09577425 | 6  |            | PACRG;PACRG;LOC285796;PACRG         |
| cg07216112 | 15 |            | ISLR2;LOC283731;ISLR2;ISLR2;ISLR2;  |
| cg05618183 | 16 | rs77688126 | FUS;FUS;FUS;FUS                     |
| cg18780276 | 2  |            | TMEM150A;TMEM150A;TMEM150A          |
| cg18061847 | 8  |            | HAS2;HAS2AS                         |
| cg03855656 | 22 |            | SERHL                               |
| cg04045419 | 10 | rs35136724 | WAC;WAC;WAC                         |
| cg21858113 | 11 | rs57371658 | SCN4B;SCN4B;SCN4B;SCN4B             |
| cg10275180 | 20 | rs1138756  | FRG1B                               |
| cg16893174 | 17 |            | ALOX12P2                            |

|            |    |            |                                 |
|------------|----|------------|---------------------------------|
| cg14641774 | 21 | rs13046079 | C21orf49;C21orf49               |
| cg10766021 | 7  |            | ZNF783                          |
| cg07873320 | 6  |            | C6orf227                        |
| cg15482500 | 11 |            | MIR210                          |
| cg21481141 | 19 |            | CIRBP;C19orf23;CIRBP;CIRBP      |
| cg04513422 | 13 |            | C13orf29                        |
| cg13402773 | 19 |            | SEC1;DBP                        |
| cg01405107 | 17 |            | LOC404266;LOC404266;LOC404266;  |
| cg13340335 | 11 |            | LOC100128239                    |
| cg07490142 | 22 | rs79301878 | FLJ39582;THAP7;FLJ39582;THAP7   |
| cg20086597 | 1  |            | LOC731275                       |
| cg16649915 | 1  |            | OR2M1P                          |
| cg27519555 | 1  | rs16863397 | GORAB;GORAB;GORAB               |
| cg01675238 | 15 |            | JMJD7-PLA2G4B;JMJD7;JMJD7-PLA2  |
| cg23181861 | 19 |            | RPL18AP3;RPL18A                 |
| cg17038116 | 1  |            | ASH1L;LOC645676                 |
| cg17050693 | 17 | rs12603630 | GHDC;GHDC;GHDC;GHDC;GHDC;GH     |
| cg12768770 | 1  |            | SNORD55;SNORD46;RPS8            |
| cg21406217 | 8  |            | INTS9;INTS9;HMBOX1;HMBOX1;INT   |
| cg19429740 | 11 |            | RNF121;RNF121;LOC100133315;RNI  |
| cg22202401 | 15 | rs78163310 | CSNK1A1P                        |
| cg25724246 | 3  |            | SNAR-I                          |
| cg09114153 | 11 |            | C11orf21;TSPAN32;C11orf21       |
| cg00832101 | 20 |            | SNHG11;SNORA39                  |
| cg09526697 | 4  |            | LOC348926                       |
| cg21112719 | 3  |            | ZNF620;ZNF620                   |
| cg03177025 | 2  |            | BRE;BRE;BRE;BRE;RBKS;BRE;LOC100 |
| cg18954434 | 22 |            | CN5H6.4;GTSE1                   |
| cg20962137 | 3  |            | COL29A1;COL29A1;COL29A1         |
| cg13078388 | 19 |            | CIRBP;C19orf23;CIRBP;CIRBP      |
| cg20309061 | 15 |            | CAPN3;CAPN3;CAPN3;CAPN3;CAPN:   |
| cg12446939 | 1  |            | ASH1L;MIR555                    |
| cg02178774 | 19 |            | LOC729991;RFXANK;LOC729991-ME   |
| cg18076500 | 19 |            | ECSIT;ECSIT;ECSIT;ECSIT         |
| cg09650667 | 3  |            | COPB2;COPB2                     |
| cg07926598 | 7  |            | SDK1;SDK1                       |
| cg12950665 | 7  |            | SDK1;SDK1                       |
| cg27416261 | 9  |            | LOC158381;LOC158381             |
| cg21812670 | 1  |            | SNORD45C;RABGGTB                |
| cg14793891 | 2  |            | GLB1L;STK16;GLB1L;STK16         |
| cg18254356 | 5  | rs534655   | LOC153684                       |
| cg21075870 | 1  | rs605506   | MSTO2P                          |
| cg10497951 | 11 |            | LOC100133315                    |
| cg07988989 | 2  |            | TMEM185B                        |

|            |    |            |                                  |
|------------|----|------------|----------------------------------|
| cg03654106 | 19 | rs62126040 | SNAR-G1;CGB1                     |
| cg19152770 | 4  |            | LOC84740                         |
| cg20498895 | 3  |            | SNORA7A;RPL32;RPL32;RPL32        |
| cg23506561 | 15 | rs3825768  | SNORD116-20;SNORD116-21          |
| cg12047086 | 2  |            | LOC151174;LOC151174              |
| cg25271404 | 15 | rs6495689  | GOLGA8B                          |
| cg06788790 | 17 |            | RNF126P1                         |
| cg24148841 | 6  |            | CDYL;CDYL;CDYL;CDYL              |
| cg11227237 | 6  | rs73439096 | C6orf52;PAK1IP1;C6orf52;C6orf52  |
| cg18588811 | 14 |            | MIR377                           |
| cg04117643 | 17 |            | EIF4A1;SNORA48                   |
| cg16621560 | 13 |            | MIR548F5;DCLK1                   |
| cg21565017 | 3  |            | C3orf49                          |
| cg05329135 | 13 |            | LOC121952                        |
| cg22142142 | 15 |            | GABARAPL3                        |
| cg06781135 | 6  |            | LOC100270746;C6orf41             |
| cg04374231 | 1  |            | LOC647121                        |
| cg09083108 | 6  |            | PACRG;PACRG;LOC285796;PACRG      |
| cg09410084 | 1  |            | ASH1L;LOC645676                  |
| cg25719236 | 6  |            | LYRM2;LYRM2;LYRM2;LYRM2          |
| cg15987431 | 1  | rs61740910 | MIR1182;FAM89A                   |
| cg03549146 | 16 |            | MIR140;WWP2;WWP2                 |
| cg09831207 | 2  | rs71410494 | PRDXDD1P                         |
| cg21857017 | 2  |            | LOC100133985                     |
| cg23684682 | 19 |            | ZNF30;ZNF30;ZNF30;ZNF30          |
| cg07959070 | 22 |            | C22orf34                         |
| cg26178446 | 2  |            | OBFC2A;OBFC2A                    |
| cg27617225 | 8  |            | CPSF1;MIR1234                    |
| cg23068797 | 19 |            | DNM2;MIR199A1;DNM2;DNM2;DNI      |
| cg21538216 | 22 |            | PARVG;PARVG;PARVG;PARVG;PARV     |
| cg11933757 | 17 | rs11540320 | NCRNA00188;NCRNA00188;NCRNA00188 |
| cg19844955 | 15 |            | SNORD116-15;SNORD116-16          |
| cg26111518 | 17 |            | GHDC;GHDC;GHDC;GHDC              |
| cg16032841 | 13 | rs2277425  | C13orf29                         |
| cg19255853 | 4  |            | LOC93622                         |
| cg13663218 | 12 |            | LOC283392;TRHDE;LOC283392        |
| cg06266993 | 17 |            | LOC404266;LOC404266;LOC404266;   |
| cg05891181 | 6  | rs72545987 | HCG27                            |
| cg01965047 | 16 |            | PKD1;MIR1225;PKD1                |
| cg16204151 | 19 | rs60314070 | MIR523                           |
| cg18923803 | 1  |            | FLVCR1;LQK1;LQK1                 |
| cg02139796 | 6  | rs2229049  | LOC442245                        |
| cg01508796 | 10 |            | C10orf75                         |
| cg20731875 | 17 |            | HS3ST3B1;MGC12916                |



|            |    |                      |                                   |
|------------|----|----------------------|-----------------------------------|
| cg01928553 | 7  |                      | ATP6V0E2;ATP6V0E2;LOC401431       |
| cg09815638 | 7  | rs73361998           | CCT6P1                            |
| cg10592710 | 3  |                      | COL29A1;COL29A1                   |
| cg03724640 | 12 |                      | CD27;LOC678655                    |
| cg24576225 | 13 |                      | LOC100190939;TPT1                 |
| cg26560928 | 7  |                      | MKLN1;FLJ43663                    |
| cg00884680 | 3  |                      | ACAA1;ACAA1;ACAA1;MYD88;ACAA      |
| cg05582165 | 3  |                      | C3orf17;C3orf17;C3orf17           |
| cg14188650 | 15 |                      | SNORD115-8                        |
| cg13374648 | 19 |                      | PEG3;PEG3;ZIM2;ZIM2;PEG3;ZIM2;N   |
| cg25588635 | 7  |                      | ZNF273;ZNF273                     |
| cg01638101 | 2  |                      | LOC100189589                      |
| cg26120756 | 8  |                      | TATDN1;TATDN1;TATDN1;NDUFB9       |
| cg18843682 | 12 |                      | HOXC4;HOXC5                       |
| cg25196296 | 8  | rs13274853 rs5024323 | FAM66A                            |
| cg21648425 | 2  | rs36226881           | CD8A;CD8A;CD8A;CD8A               |
| cg10763594 | 2  | rs78470215           | DIRC3                             |
| cg04112787 | 22 | rs13053481           | psiTPTE22                         |
| cg16201596 | 6  | rs9261106            | HLA-J;NCRNA00171                  |
| cg11456756 | 6  |                      | HLA-L                             |
| cg06752340 | 21 | rs11910504           | C21orf49;C21orf66;C21orf66;C21orf |
| cg00407150 | 3  |                      | HHATL;HHATL                       |
| cg14421309 | 2  |                      | ZEB2;ZEB2;ZEB2;ZEB2;ZEB2          |
| cg00610228 | 6  | rs35168508           | FKBP5;LOC285847                   |
| cg25945303 | 10 |                      | KLF6;KLF6;KLF6;KLF6               |
| cg15149095 | 1  |                      | SYT14;SYT14;SYT14;SYT14;SYT14;SY  |
| cg05767306 | 3  |                      | AMT;AMT;AMT;AMT;AMT               |
| cg14425733 | 22 |                      | LOC150381;C22orf26                |
| cg07573279 | 11 |                      | LOC645332                         |
| cg01358993 | 5  |                      | LOC645323;LOC645323;LOC645323     |
| cg07095783 | 10 |                      | ZEB1;ZEB1;ZEB1;ZEB1;ZEB1;ZEB1     |
| cg27331871 | 11 |                      | INS-IGF2;IGF2;INS-IGF2            |
| cg20104055 | 3  | rs77327593           | LSM3;XPC;XPC;XPC                  |
| cg13697715 | 5  |                      | LOC202181                         |
| cg01273384 | 20 |                      | MIR1257                           |
| cg11905407 | 11 |                      | CASP5;CASP5;CASP5;CASP5;CASP5;C   |
| cg01348570 | 4  |                      | UBA6;LOC550112                    |
| cg23108728 | 2  |                      | TUBA4B;TUBA4A                     |
| cg11517045 | 2  | rs59694669           | MTHFD2;MTHFD2                     |
| cg01472299 | 6  |                      | CDYL                              |
| cg11740927 | 20 |                      | LOC643406                         |
| cg05919625 | 18 | rs73426565           | ZNF271;ZNF397OS;ZNF271;ZNF397C    |
| cg15654127 | 7  |                      | POT1;POT1;POT1;POT1;POT1;POT1;    |
| cg05776603 | 14 |                      | CFL2;CFL2;CFL2;CFL2;CFL2          |

|            |    |            |                                  |
|------------|----|------------|----------------------------------|
| cg13547299 | 11 |            | TOLLIP;LOC255512                 |
| cg03136625 | 6  |            | C6orf48;C6orf48;C6orf48;SNORD48; |
| cg10716163 | 19 |            | MUM1;MUM1                        |
| cg03955764 | 10 |            | LOC100133308                     |
| cg17354052 | 16 |            | UBFD1;EARS2;EARS2                |
| cg10715527 | 8  |            | ANK1;MIR486;ANK1;ANK1;ANK1;AN    |
| cg11783815 | 6  |            | C6orf227                         |
| cg09141338 | 17 |            | FXR2;SHBG                        |
| cg01311102 | 9  |            | PTGES2;PTGES2;PTGES2             |
| cg25064146 | 11 | rs12789541 | TIMM8B;SDHD;TIMM8B               |
| cg02649063 | 16 | rs7200011  | CES4                             |
| cg17504991 | 6  |            | DAXX;DAXX;DAXX;DAXX              |
| cg20266104 | 17 | rs9901071  | TMEM11;TMEM11                    |
| cg23572163 | 22 | rs58514871 | psiTPTE22                        |
| cg14814323 | 11 |            | SMPD1;SMPD1;SMPD1                |
| cg25877179 | 17 |            | SNORD42B;RPL23A                  |
| cg02593924 | 16 |            | IGFALS;IGFALS;IGFALS             |
| cg24823137 | 19 |            | MIR372;MIR371;MIR373             |
| cg01322165 | 2  | rs11556398 | TRIB2;TRIB2;TRIB2                |
| cg18311708 | 7  |            | ZNF767;ZNF767                    |
| cg08884624 | 2  |            | MYCNOS;MYCN                      |
| cg04188086 | 1  |            | FLJ37453;SPEN                    |
| cg04288299 | 4  |            | WHSC2;MIR943                     |
| cg25012898 | 1  |            | TMEM79;SMG5                      |
| cg04627849 | 22 |            | POM121L1P                        |
| cg05774978 | 1  | rs1053423  | PDIA3P                           |
| cg03693749 | 6  |            | HLA-DPB2                         |
| cg07314523 | 17 |            | AFMID;AFMID;AFMID;TK1;AFMID      |
| cg26053291 | 2  | rs34513596 | FLJ40330                         |
| cg14821382 | 2  |            | C2orf14                          |
| cg01852272 | 19 |            | LOC284440                        |
| cg08264885 | 8  | rs78882264 | POLR3D;MIR320A                   |
| cg06545143 | 6  |            | LOC441177;C6orf176;C6orf176      |
| cg21525314 | 7  |            | DPY19L2P2;DPY19L2P2              |
| cg08839210 | 17 |            | RAB34;RAB34;RAB34;RAB34;RAB34;   |
| cg01229567 | 1  |            | MIB2;MIB2;MIB2;MIB2;MIB2;MIB2    |
| cg07527324 | 14 |            | C14orf159;C14orf159;C14orf159;SN |
| cg10884885 | 1  |            | LOC149134                        |
| cg05492270 | 11 |            | RNF121;LOC100133315;RNF121;RNI   |
| cg07940593 | 22 |            | RPL3;SNORD83B;RPL3               |
| cg16403299 | 1  |            | C1orf97                          |
| cg13206706 | 1  |            | RPL5;SNORD21                     |
| cg15837838 | 17 | rs59489829 | CCDC144C                         |
| cg16385939 | 1  |            | LOC728875                        |

|            |    |            |                                     |
|------------|----|------------|-------------------------------------|
| cg09242100 | 19 | rs35441287 | ZNF525                              |
| cg22725901 | 19 |            | MIR518C                             |
| cg24059871 | 19 |            | POP4;POP4                           |
| cg07187233 | 1  |            | DISC1;DISC1;TSNAX-DISC1;DISC1;DISC1 |
| cg06317622 | 16 |            | GFOD2;GFOD2;GFOD2                   |
| cg07529750 | 2  | rs72492115 | LOC654342                           |
| cg08165151 | 6  |            | NCRNA00120;AKIRIN2                  |
| cg25776856 | 7  | rs55859862 | SLC26A4;LOC286002                   |
| cg22772180 | 13 |            | PSPC1;PSPC1                         |
| cg18981338 | 14 |            | DHRS4;C14orf167;C14orf167;C14orf167 |
| cg23522832 | 1  |            | LOC400752                           |
| cg16638920 | 5  |            | LOC645323;LOC645323                 |
| cg09663204 | 5  |            | LOC100129716;ARRDC3                 |
| cg01521378 | 6  |            | NCRNA00171                          |
| cg15719339 | 21 | rs75623773 | C21orf34;C21orf34                   |
| cg06906869 | 13 |            | NEK3;NEK3;NEK3;NEK3                 |
| cg00261534 | 10 |            | KLF6;KLF6;KLF6;KLF6                 |
| cg12486710 | 1  |            | C1orf220;C1orf220                   |
| cg18366455 | 3  |            | SOX2OT                              |
| cg13959647 | 9  |            | PSMD5;LOC253039                     |
| cg04992930 | 5  | rs16880430 | BRD9;BRD9;BRD9                      |
| cg08423149 | 7  |            | RNF216L;RNF216L;RNF216L             |
| cg20653009 | 17 | rs73301318 | LOC284100                           |
| cg04402891 | 20 |            | NCRNA00029                          |
| cg21532432 | 11 |            | IGF2AS;INS-IGF2;IGF2;IGF2AS         |
| cg12119029 | 16 |            | CDK10;CDK10;CDK10;CDK10;CDK10;      |
| cg11867420 | 7  |            | STAG3L4;PMS2L4                      |
| cg07927379 | 7  | rs74424274 | C7orf13;RNF32                       |
| cg21287936 | 19 |            | ZNF667;ZNF667                       |
| cg19678029 | 11 |            | KCNQ1OT1;KCNQ1;KCNQ1                |
| cg16635550 | 6  |            | STK19;STK19;DOM3Z;STK19             |
| cg07218344 | 13 |            | TRIM13;TRIM13;TRIM13;TRIM13;TRIM13  |
| cg26137121 | 8  |            | C8ORFK29                            |
| cg17539315 | 12 |            | LARP4;LARP4;LARP4;LARP4;LARP4;LARP4 |
| cg15164573 | 17 |            | LOC100128288                        |
| cg12528452 | 11 |            | INS-IGF2;IGF2;IGF2;IGF2             |
| cg05308293 | 7  |            | RPS2P32                             |
| cg26039305 | 11 |            | MIR670                              |
| cg14257107 | 1  | rs71664096 | GNRHR2;RBM8A                        |
| cg07987890 | 15 |            | MIR548H4                            |
| cg00808170 | 5  |            | PCDHGA4;PCDHGA11;PCDHGA11;PCDHGA11  |
| cg12503971 | 12 |            | LOC100240735;FLJ12825               |
| cg24874705 | 15 |            | LOC645752                           |
| cg00543443 | 20 |            | LOC647979                           |

|            |    |            |                                 |
|------------|----|------------|---------------------------------|
| cg05173737 | 14 |            | FLJ43390                        |
| cg10432093 | 6  |            | HCG9                            |
| cg04915414 | 1  |            | SHC1;SHC1;CKS1B;CKS1B           |
| cg05641843 | 17 | rs11552638 | EIF4A1;SNORA48                  |
| cg24844423 | 19 |            | PEG3;PEG3;ZIM2;ZIM2;PEG3;ZIM2;N |
| cg03367679 | 17 |            | MED24;MED24;SNORD124            |
| cg01820463 | 2  |            | FTHL3;PPM1G;PPM1G               |
| cg27611263 | 2  |            | THUMPD2;THUMPD2                 |
| cg19660618 | 12 |            | LOC100286844;NCKAP5L;NCKAP5L;l  |
| cg01105073 | 11 |            | PGAP2;PGAP2;PGAP2;PGAP2;PGAP2   |
| cg01630479 | 22 |            | MIR1306;DGCR8                   |
| cg03082779 | 20 |            | ZMYND8;LOC100131496;ZMYND8;Z    |
| cg09281979 | 2  |            | DCAF17;METTL8;DCAF17;DCAF17     |
| cg21633052 | 4  |            | C4orf38                         |
| cg25576352 | 19 |            | ECSIT;ECSIT;ECSIT;ECSIT         |
| cg09916234 | 4  |            | WHSC1;WHSC1;WHSC1;SCARNA22;l    |
| cg17339147 | 7  |            | WNT2;WNT2                       |
| cg07273415 | 11 |            | TMEM138;CYBASC3;CYBASC3;TMEN    |
| cg14485809 | 10 |            | FLJ41350;LBX1                   |
| cg13500842 | 19 | rs76389034 | GYS1;GYS1;GYS1                  |
| cg03332810 | 10 |            | PPP2R2D;PPP2R2D;PPP2R2D         |
| cg02659673 | 1  |            | LOC100133612;C1orf174           |
| cg22619824 | 7  |            | ST7;ST7;ST7OT2                  |
| cg08408453 | 11 | rs34193719 | PDE2A;PDE2A;PDE2A;PDE2A         |
| cg18997137 | 13 |            | FLJ37307;FLJ37307               |
| cg11136251 | 15 |            | ZWILCH;ZWILCH;RPL4              |
| cg01027728 | 5  |            | LOC255167;LOC255167             |
| cg19843451 | 1  | rs61437216 | LOC400752                       |
| cg05697832 | 7  |            | SDK1;SDK1                       |
| cg07220782 | 6  |            | LOC100270746;C6orf41            |
| cg16579431 | 16 |            | TMEM8A;LOC100134368             |
| cg24051554 | 1  |            | LOC100132111;C2CD4D             |
| cg17774634 | 6  |            | C6orf167;MIR548H3               |
| cg25114075 | 3  |            | CEP63;ANAPC13;CEP63;ANAPC13;C1  |
| cg05175337 | 5  |            | RNU5E;RNU5D;ZCCHC9;ZCCHC9;ZCC   |
| cg04419707 | 22 | rs17555272 | RPL3;SNORD43;RPL3               |
| cg22358276 | 6  |            | C6orf59;AGPAT4                  |
| cg26702985 | 10 |            | ZNF37B                          |
| cg03964851 | 5  | rs77830550 | MIR1974;C5orf36;C5orf36         |
| cg09872104 | 7  |            | C7orf49;C7orf49;C7orf49;C7orf49 |
| cg04144321 | 12 |            | NCRNA00173;NCRNA00173           |
| cg09559971 | 16 |            | TRAF7;SNORD60                   |
| cg16424519 | 16 |            | SLC7A5P2                        |
| cg08306955 | 6  |            | CMAH;CMAH                       |

|            |    |                     |                                  |
|------------|----|---------------------|----------------------------------|
| cg03562868 | 6  |                     | PLAGL1;PLAGL1;PLAGL1;PLAGL1;PLA  |
| cg24255269 | 3  |                     | PISRT1                           |
| cg18002437 | 1  |                     | LOC728875                        |
| cg06158985 | 3  |                     | C3orf74                          |
| cg18598029 | 6  |                     | HCG27                            |
| cg12339904 | 22 |                     | RFPL1S;RFPL1                     |
| cg13135459 | 10 |                     | LOC387646                        |
| cg18162350 | 1  |                     | PABPC4;PABPC4;PABPC4;SNORA55     |
| cg12110333 | 5  | rs72719206          | LOC728613                        |
| cg07553475 | 6  |                     | FLJ22536                         |
| cg21482745 | 2  |                     | NEURL3                           |
| cg17201760 | 4  |                     | ZNF876P                          |
| cg21871203 | 3  |                     | KCNMB3;KCNMB3;KCNMB3;KCNMB       |
| cg02232751 | 11 |                     | LDHA;LDHA;LDHA;LDHA;LDHA         |
| cg11379605 | 1  | rs77252600          | CD58;CD58;CD58                   |
| cg07604732 | 16 |                     | LOC728276                        |
| cg20996579 | 14 |                     | FLJ31306;FLJ31306;ARID4A;ARID4A; |
| cg23435915 | 5  |                     | LOC153684                        |
| cg27333886 | 19 |                     | SAE1;SAE1;SAE1;SAE1              |
| cg03043822 | 22 |                     | TOP1P2;PIWIL3                    |
| cg14753458 | 3  |                     | IP6K2;IP6K2;IP6K2;IP6K2;IP6K     |
| cg08855729 | 12 |                     | H2AFJ;H2AFJ                      |
| cg02585417 | 12 |                     | MIR618;LIN7A                     |
| cg00097536 | 2  | rs71707059          | ZFP36L2;LOC100129726             |
| cg02596499 | 7  |                     | FLJ43663;FLJ43663                |
| cg13305186 | 11 |                     | TMX2;TMX2;TMX2;C11orf31          |
| cg06688014 | 10 |                     | XPNPEP1;XPNPEP1;XPNPEP1          |
| cg23718418 | 6  |                     | PHF1;PHF1;PHF1                   |
| cg15772366 | 6  |                     | TRAF3IP2;TRAF3IP2;TRAF3IP2       |
| cg26550938 | 1  | rs74678936          | LOC100133612                     |
| cg03047554 | 14 |                     | THTPA;THTPA;THTPA;THTPA;THTPA    |
| cg22705386 | 7  |                     | MEST;MEST;MEST;MESTIT1           |
| cg08639244 | 19 |                     | ATP5SL;ATP5SL;ATP5SL;ATP5SL;ATP! |
| cg05691383 | 9  |                     | LOC340508                        |
| cg26469244 | 15 |                     | SNORD115-21;SNORD115-20;SNORI    |
| cg13858747 | 11 | rs5743851           | LOC255512;TOLLIP                 |
| cg13553147 | 1  |                     | SNORD38B;RPS8                    |
| cg22369818 | 15 |                     | GABPB1;GABPB1;GABPB1;FLJ10038;   |
| cg00786256 | 6  |                     | C6orf147                         |
| cg09218524 | 15 |                     | LOC283663                        |
| cg08049736 | 6  |                     | HLA-L                            |
| cg24245352 | 22 | rs3986050 rs3986049 | RNF185;RNF185;RNF185;RNF185;RN   |
| cg22178096 | 3  |                     | RPL32P3                          |
| cg21417675 | 7  |                     | LOC286016;TNPO3;TNPO3            |

|            |    |            |                                   |
|------------|----|------------|-----------------------------------|
| cg15679153 | 3  |            | LSM3;XPC;XPC;XPC;LSM3             |
| cg14048487 | 17 |            | BRCA1;BRCA1;BRCA1;BRCA1;BRCA1     |
| cg04925196 | 12 |            | POU6F1;POU6F1                     |
| cg15691003 | 1  |            | HSPC157;HSPC157                   |
| cg22065500 | 7  |            | TNPO3;LOC286016                   |
| cg25477839 | 8  |            | ZNF252;C8orf77                    |
| cg07655479 | 4  |            | LOC441046                         |
| cg09318162 | 6  | rs77813053 | PPP1R2P1                          |
| cg14014525 | 17 |            | G6PC3;G6PC3;G6PC3                 |
| cg20121513 | 6  |            | GUSBL2                            |
| cg06083642 | 7  |            | CHPF2;MIR671                      |
| cg07960084 | 17 |            | TMEM11;TMEM11;TMEM11              |
| cg25268451 | 20 |            | GNASAS;GNAS                       |
| cg08969198 | 22 | rs9623641  | RNU12;POLDIP3;POLDIP3             |
| cg02606403 | 2  |            | LOC100132215                      |
| cg05670472 | 5  |            | PCDHGA4;PCDHGA11;PCDHGA11;PC      |
| cg27395922 | 11 | rs58491120 | LOC441601                         |
| cg26988585 | 17 |            | CDRT15P                           |
| cg07324381 | 9  |            | GPSM1;GPSM1;LOC26102              |
| cg00074348 | 11 |            | APLNR;APLNR                       |
| cg12212101 | 7  |            | RP9P                              |
| cg24087783 | 1  |            | TRNAU1AP;TRNAU1AP                 |
| cg00450487 | 8  |            | ZFAND1;ZFAND1;ZFAND1;ZFAND1;Z     |
| cg10205287 | 4  |            | MAPKSP1;MAPKSP1;MAPKSP1           |
| cg27490387 | 6  |            | HCG11                             |
| cg09400566 | 19 | rs11555033 | C19orf23;CIRBP;CIRBP;CIRBP        |
| cg12007399 | 19 |            | ZFR2;ZFR2;ZFR2                    |
| cg21019820 | 3  |            | MIR191;NDUFAF3;NDUFAF3;NDUFA      |
| cg05137443 | 6  | rs17221401 | HLA-DPB2                          |
| cg27592126 | 17 |            | RPL23;SNORA21                     |
| cg24155748 | 7  |            | POLR2J4                           |
| cg02975060 | 14 |            | MIR1185-2                         |
| cg20177310 | 2  | rs56254527 | ZEB2;ZEB2;ZEB2                    |
| cg16970804 | 5  |            | LOC153684                         |
| cg07800806 | 22 |            | LOC91316                          |
| cg00346898 | 1  |            | TSNAX-DISC1;DISC1;DISC1;DISC1;DIS |
| cg25707676 | 7  |            | DLX6AS                            |
| cg16745104 | 20 |            | MIR941-1;MIR941-3;MIR941-2;MIR5   |
| cg25361850 | 19 |            | ZNF577;ZNF577;ZNF577              |
| cg05285228 | 7  |            | POT1;POT1;POT1;POT1;POT1          |
| cg12930819 | 2  | rs6751132  | LMAN2L;LMAN2L;LMAN2L;LMAN2L;      |
| cg26856583 | 16 | rs74605057 | MAP1LC3B;FBXO31;MAP1LC3B          |
| cg19537184 | 19 |            | MIR520C;MIR526A1                  |
| cg10145584 | 11 |            | IL10RA;IL10RA                     |

|            |    |            |                                  |
|------------|----|------------|----------------------------------|
| cg26590411 | 4  |            | SNORA24;SNHG8                    |
| cg01254948 | 5  |            | GPR98;GPR98                      |
| cg26361313 | 10 |            | LOC282997;PDCD4;PDCD4            |
| cg06905762 | 5  | rs1279736  | GNB2L1;SNORD95                   |
| cg02228481 | 6  | rs3130463  | HCG27                            |
| cg02967546 | 17 |            | C17orf91;C17orf91;WDR81;C17orf9  |
| cg20335185 | 1  |            | MSTO2P                           |
| cg16251576 | 12 | rs4842677  | LOC338758                        |
| cg10836887 | 5  |            | LOC645323                        |
| cg14550519 | 17 |            | LOC653653                        |
| cg09661284 | 5  | rs41285575 | GNB2L1;SNORD95                   |
| cg17274400 | 12 |            | NECAP1;NECAP1                    |
| cg08737296 | 20 |            | MIR124-3                         |
| cg15168906 | 11 |            | IGF2AS;INS-IGF2;IGF2;IGF2;IGF2AS |
| cg24753148 | 11 |            | APLP2;APLP2;APLP2;APLP2;APLP2;A  |
| cg02774282 | 6  |            | CCDC162                          |
| cg13038025 | 15 |            | JMJD7-PLA2G4B;JMJD7-PLA2G4B;PL   |
| cg04155485 | 7  |            | MIR589;FBXL18                    |
| cg17109533 | 19 |            | MIR515-2;MIR515-1                |
| cg10036368 | 6  |            | LOC285796                        |
| cg05352541 | 22 |            | PITPNB;LOC284900;LOC284900       |
| cg09758490 | 4  | rs74322951 | LOC100130872;LOC100130872-SPOI   |
| cg07618928 | 2  | rs2241879  | ATG16L1;SCARNA5;ATG16L1          |
| cg12654189 | 7  |            | LOC100134713;NDUFB2              |
| cg02627887 | 5  |            | LOC645323                        |
| cg01462607 | 19 |            | NCRNA00085                       |
| cg26257814 | 19 |            | FLJ26850                         |
| cg14051842 | 6  |            | LOC100270746;C6orf41             |
| cg12959622 | 20 |            | SNORD12B;C20orf199;SNORD12C;M    |
| cg13197733 | 7  | rs11983460 | FAM185A;FAM185A;FAM185A          |
| cg08066497 | 7  |            | SLC25A13;SLC25A13;SLC25A13       |
| cg14113010 | 5  |            | GNB2L1;SNORD95                   |
| cg10245314 | 1  |            | UBE2J2;UBE2J2;LOC100128842;UBE   |
| cg04107539 | 7  | rs1128461  | TP53TG1                          |
| cg01537486 | 11 | rs11558674 | SNORD27;SNORD26;SNORD29;SNOF     |
| cg06627801 | 4  |            | WHSC1;WHSC1;WHSC1;SCARNA22;1     |
| cg22420044 | 7  |            | MCM7;MCM7;MIR25                  |
| cg15379025 | 21 |            | C21orf82;C21orf82                |
| cg10706100 | 6  |            | LOC441177;C6orf176;C6orf176      |
| cg16539629 | 14 |            | C14orf132                        |
| cg01572694 | 17 |            | MIR10A                           |
| cg14903612 | 10 |            | LOC283050;LOC283050;LOC283050    |
| cg04927033 | 17 |            | LOC644172                        |
| cg16922466 | 6  |            | DAXX;DAXX;DAXX;DAXX              |

|            |    |                       |                                       |
|------------|----|-----------------------|---------------------------------------|
| cg19603557 | 17 |                       | COX11;COX11;COX11;COX11;STXBP4        |
| cg19695521 | 6  | rs6906180             | HCG18;HCG18                           |
| cg07422345 | 19 | rs41428545            | LOC80054;CEBPA                        |
| cg07953034 | 19 |                       | ECSIT;ECSIT;ECSIT;ECSIT;ECSIT;ECSIT   |
| cg00147751 | 7  |                       | GATS;GATS;GATS;GATS;PVRIG             |
| cg16572540 | 19 |                       | MIR24-2                               |
| cg11608241 | 8  | rs35229339            | FLJ10661;FLJ10661;FLJ10661            |
| cg24260710 | 22 |                       | MIR33A;SREBF2                         |
| cg01521220 | 17 | rs77574787            | MIR1203;SKAP1;SKAP1                   |
| cg26143338 | 5  | rs35952611            | SDHAP3                                |
| cg00431236 | 2  |                       | ACP1;SH3YL1;ACP1;ACP1;ACP1;SH3BP1     |
| cg08229366 | 7  |                       | MESTIT1;MEST;MEST;MEST                |
| cg01520105 | 6  |                       | TRAF3IP2;TRAF3IP2;TRAF3IP2;TRAF3IP2   |
| cg07242427 | 6  |                       | MGC26597                              |
| cg07116997 | 7  |                       | HOXA11AS;HOXA11                       |
| cg07788369 | 7  | rs34413484            | DLX6AS                                |
| cg16357834 | 4  |                       | MGC45800                              |
| cg11700800 | 5  |                       | FLJ42709;FLJ42709;FLJ42709            |
| cg15157453 | 1  | rs71763394 rs80107141 | POMGNT1;POMGNT1                       |
| cg22537343 | 19 |                       | MIR525                                |
| cg22658229 | 13 |                       | SUGT1L1                               |
| cg15062711 | 1  |                       | TMED5;CCDC18;TMED5;TMED5;CCDC18       |
| cg07516483 | 8  |                       | LOC100192378                          |
| cg19981839 | 16 |                       | CD2BP2;CD2BP2                         |
| cg23942884 | 6  |                       | PPP1R2P1                              |
| cg24195169 | 7  |                       | LOC349114                             |
| cg06969395 | 5  | rs62387132            | LOC100133050                          |
| cg11891983 | 18 |                       | RPL17;SNORD58A;SNORD58B;RPL17         |
| cg05055326 | 6  |                       | HCG9                                  |
| cg14282222 | 7  | rs62481876            | C7orf49;C7orf49;C7orf49               |
| cg01983504 | 20 |                       | PANK2;MIR103-2;PANK2;PANK2            |
| cg04255278 | 5  |                       | FLJ42709;FLJ42709;NR2F1               |
| cg12469954 | 11 |                       | LOC143666;PHRF1                       |
| cg03892356 | 12 | rs74089890            | HOXC4;HOXC5;HOXC6;HOXC6               |
| cg09060275 | 22 |                       | MIAT                                  |
| cg16847051 | 12 |                       | CALCOCO1;CALCOCO1;CALCOCO1            |
| cg05115468 | 11 | rs2269353             | SNORD27;SLC3A2;SLC3A2;SNORD26         |
| cg11688874 | 10 |                       | WAC;WAC;WAC;WAC;WAC                   |
| cg17594424 | 15 | rs11555369 rs1049531  | MIR1282;SERF2                         |
| cg08754067 | 5  |                       | SNORD72;RPL37                         |
| cg15364169 | 6  | rs6939616             | HLA-J;NCRNA00171                      |
| cg16391783 | 15 | rs78774742            | C15orf34;HEXA                         |
| cg11032038 | 16 | rs80101105            | MIR1826                               |
| cg05988158 | 22 |                       | CHKB-CPT1B;CHKB;LOC100144603;C15orf34 |



|            |    |            |                                 |
|------------|----|------------|---------------------------------|
| cg04516152 | 9  | rs2275157  | SNHG7;SNORA17;SNHG7;SNHG7       |
| cg05821634 | 1  | rs77695076 | FLJ37453                        |
| cg18563153 | 8  |            | PVT1                            |
| cg04543156 | 10 |            | ATAD1;ATAD1;CFLP1               |
| cg00661523 | 3  |            | MBNL1;MBNL1;LOC401093;LOC4010   |
| cg26534477 | 17 | rs35067771 | G6PC3;G6PC3;G6PC3               |
| cg13997013 | 2  |            | LOC285074                       |
| cg10972625 | 1  |            | LOC100286793;FLJ39739           |
| cg02484047 | 19 |            | MORG1;MORG1;MAN2B1              |
| cg20521277 | 8  |            | C8orf75                         |
| cg11128021 | 5  |            | RNU5E;RNU5D                     |
| cg20523169 | 17 |            | FLJ45079                        |
| cg19269520 | 17 |            | LOC90586                        |
| cg12296644 | 1  |            | GNRHR2;PEX11B                   |
| cg14123427 | 14 |            | MEG3;MEG3;MEG3                  |
| cg06559318 | 6  | rs28679786 | HLA-DRB6                        |
| cg08775774 | 12 |            | CCDC62;CCDC62;CCDC62            |
| cg00537203 | 17 |            | LOC92659;MAFG                   |
| cg01605984 | 9  |            | SNORD24;SNORD36B;MED22;RPL7A    |
| cg01250961 | 10 |            | EMX2OS                          |
| cg09278885 | 1  | rs12034613 | C1orf86;LOC100128003;C1orf86    |
| cg10281852 | 8  | rs35229339 | FLJ10661;FLJ10661;FLJ10661      |
| cg15869022 | 2  |            | GPR17;GPR17;LIMS2;LIMS2;LIMS2;C |
| cg09615909 | 6  |            | DAXX;DAXX;DAXX;DAXX             |
| cg07895657 | 22 |            | PANX2;PANX2;PANX2               |
| cg14245347 | 6  | rs2523801  | HLA-H                           |
| cg18224077 | 11 |            | LOC399959                       |
| cg06324048 | 20 | rs6026561  | GNAS;GNAS;GNAS;GNASAS           |

| UCSC_RefGene_Accession                                          | UCSC_RefGene_Group                   | Relation_to_IDMR |      |
|-----------------------------------------------------------------|--------------------------------------|------------------|------|
| NR_027023;NM_018489                                             | TSS1500;5'UTR                        | N_Shore          |      |
| NR_003667;NM_016410;NM_024469                                   | Body;TSS200;TSS200                   | Island           |      |
| NR_024469                                                       | Body                                 | Island           |      |
| NR_004407                                                       | TSS200                               |                  |      |
| NR_028044;NR_003512;NM_027239;NM_032825;NM_026936               | Body;Body;5'UTR;Body                 | S_Shore          |      |
| NR_027239;NM_032825;NM_026936                                   | TSS200;5'UTR;TSS200;TSS200           | Island           |      |
| NR_026936                                                       | Body                                 |                  |      |
| NR_003713                                                       | TSS200                               | Island           |      |
| NM_201402;NR_027425                                             | TSS1500;Body                         |                  |      |
| NM_001099289;NR_029193                                          | TSS1500;Body                         | Island           | DMR  |
| NR_024431;NR_024429;NR_032271;NR_002736                         | Body;Body;Body                       | Island           |      |
| NM_032271;NR_002736                                             | TSS1500;TSS200                       | N_Shore          |      |
| NM_001656;NM_001093755                                          | 5'UTR;TSS1500;5'UTR;TSS150           | Island           |      |
| NR_003504                                                       | Body                                 | Island           |      |
| NR_024282                                                       | TSS1500                              | Island           |      |
| NR_027822                                                       | Body                                 | Island           | DMR  |
| NR_027092;NR_027093;NR_053023;NM_001143995                      | Body;TSS1500;Body                    | Island           |      |
| NM_053023;NM_001143995                                          | TSS1500;TSS200;TSS1500               | Island           |      |
| NR_028444;NM_006810                                             | TSS1500;TSS1500                      | N_Shore          |      |
| NR_026826;NM_001145159;                                         | TSS1500;TSS1500;5'UTR;1stE           | Island           |      |
| NM_005510;NM_004197;NM_026564;NR_026541;NR_015427               | 5'UTR;1stExon;1stExon;1stExon        | Island           |      |
| NR_026564;NR_026541;NR_015427                                   | TSS200;TSS200;TSS1500                | Island           |      |
| NR_015427                                                       | TSS1500                              | N_Shore          |      |
| NR_027822                                                       | TSS1500                              | N_Shore          |      |
| NM_002136;NR_002944;NM_002795                                   | Body;Body;Body                       | S_Shore          |      |
| NR_002795                                                       | Body                                 | N_Shore          | RDMR |
| NM_004375;NR_027942;NR_024167;NR_024166;NM_015379               | 1stExon;Body;Body;1stExon;1stExon    | Island           |      |
| NR_024167;NR_024166;NM_015379                                   | TSS200;TSS200;Body;Body              | N_Shelf          |      |
| NR_015379                                                       | TSS1500                              |                  |      |
| NM_013417;NM_002161;NR_015432                                   | 5'UTR;5'UTR;TSS1500;1stExon          | Island           |      |
| NR_015432                                                       | TSS200                               | Island           |      |
| NM_032470;NM_032470;NR_000994;NR_002582;NM_003512;NM_001127598; | 5'UTR;1stExon;TSS200;TSS1500;TSS1500 | Island           |      |
| NR_000994;NR_002582;NM_003512;NM_001127598;                     | 5'UTR;TSS1500;TSS1500;1stE           | Island           |      |
| NR_003512;NM_001127598;                                         | Body;Body;Body;Body                  | Island           |      |
| NM_173627;NR_029376;NM_007300;NR_027676;NM_052879;NM_001170803  | Body;TSS200;Body;Body                | Island           |      |
| NR_029376;NM_007300;NR_027676;NM_052879;NM_001170803            | 5'UTR;Body;5'UTR;TSS1500;5'UTR       | N_Shore          |      |
| NM_052879;NM_001170803                                          | Body;Body;Body;Body;Body;Body        | S_Shore          |      |
| NM_001170687;NM_001170                                          | TSS1500;TSS1500;TSS1500;TSS1500      | N_Shore          |      |
| NM_177967;NM_001144072                                          | 5'UTR;Body;Body;1stExon              | Island           |      |
| NR_015402;NR_024141;NM_002728;NM_000218;NM_002818               | Body;Body;TSS200;Body;TSS1500        | Island           |      |
| NR_002728;NM_000218;NM_002818                                   | TSS1500;Body;Body                    | S_Shore          |      |
| NR_002818                                                       | TSS200                               | N_Shore          |      |
| NM_139131;NM_001145439                                          | 5'UTR;TSS1500;5'UTR;TSS150           | N_Shore          | RDMR |

|                                                                                                     |                                                        |         |     |
|-----------------------------------------------------------------------------------------------------|--------------------------------------------------------|---------|-----|
| NR_003662                                                                                           | TSS200                                                 | N_Shore |     |
| NM_001142273;NM_015282                                                                              | Body;Body;Body;Body                                    | S_Shore |     |
| NM_145352;NR_028075;NM_001170687;NM_001170                                                          | Body;Body;Body;Body;Body                               | Island  |     |
| NM_001166284;NR_029402;                                                                             | TSS1500;TSS1500;TSS1500;TSS1500                        | Island  |     |
| NR_003512;NM_001007139;                                                                             | Body;3'UTR;3'UTR;3'UTR                                 | Island  |     |
| NR_033231;NR_033230;NM_027397;NM_001146039;                                                         | TSS200;TSS200;TSS200;TSS200                            | Island  |     |
| NR_031679;NM_198468                                                                                 | Body;TSS1500                                           | S_Shore |     |
| NR_024181;NM_032679;NM_015358                                                                       | TSS200;TSS200;TSS200                                   | Island  |     |
| NR_026791                                                                                           | Body                                                   | S_Shore |     |
| NR_024625;NM_001142931;                                                                             | Body                                                   | Island  |     |
| NR_002819                                                                                           | TSS1500;TSS1500;TSS1500;TSS1500                        | N_Shore |     |
| NR_026875                                                                                           | TSS200                                                 | Island  |     |
| NR_028514;NM_130766;NM_014415;NR_024407                                                             | Body                                                   | N_Shore |     |
| NM_032846;NR_028074;NM_001143979;NR_030159;                                                         | TSS1500;5'UTR;5'UTR;Body                               | N_Shore |     |
| NM_021253;NR_024052;NR_003584;NR_002963                                                             | 1stExon;Body                                           | Island  |     |
| NR_026682;NM_016093;NR_024421;NM_032772;NR_003044;NR_003038;NR_014596;NM_170783;NR_173631;NR_002166 | Body;Body;TSS1500;5'UTR;1stExon                        | N_Shore |     |
| NR_029435;NR_029434;NM_001014444;NR_026675                                                          | Body;Body;TSS1500;5'UTR                                | N_Shore |     |
| NR_024084;NM_024632;NM_024240;NR_026751                                                             | TSS1500;Body;Body;Body;TSS1500;TSS1500;TSS1500;TSS1500 | N_Shore |     |
| NR_027416;NM_152347                                                                                 | TSS1500;Body                                           | N_Shore |     |
| NR_024378                                                                                           | TSS1500                                                | Island  |     |
| NR_015454;NM_002359                                                                                 | TSS200;TSS200                                          | Island  |     |
| NR_027130                                                                                           | TSS200                                                 | Island  |     |
| NM_001130001;NM_001099                                                                              | TSS1500;TSS1500;TSS1500;TSS1500                        | Island  |     |
| NR_027635;NM_024063                                                                                 | TSS200;TSS200                                          | N_Shore |     |
| NR_027073;NM_020851;NM_028301;NR_028302;NR_026703                                                   | Body;TSS1500;TSS200;TSS1500                            | Island  |     |
| NR_026971                                                                                           | Body;Body;TSS1500                                      | Island  | DMR |
| NR_027645;NR_024126;NR_017444;NR_023360                                                             | TSS200                                                 | S_Shore |     |
| NM_138764;NM_004324;NM_138387;NR_028582;NR_014415;NR_024407                                         | TSS1500;TSS1500;TSS1500;TSS1500                        | S_Shore |     |
| NM_138387;NR_028582;NR_014415;NR_024407                                                             | Body;Body                                              | Island  |     |
| NM_138764;NM_004324;NM_138387;NR_028582;NR_014415;NR_024407                                         | TSS1500;TSS1500;TSS1500;TSS1500                        | N_Shore |     |
| NM_138387;NR_028582;NR_014415;NR_024407                                                             | 1stExon;Body;Body;5'UTR                                | Island  |     |

|                        |                                 |         |      |
|------------------------|---------------------------------|---------|------|
| NR_026876              | Body                            | Island  |      |
| NM_014620;NM_153693;NR | TSS200;TSS200;TSS200            | N_Shore |      |
| NM_022492;NR_027749;NM | Body;Body;TSS200                | S_Shore |      |
| NR_024367              | TSS200                          |         |      |
| NM_005378;NM_005378;NR | 1stExon;5'UTR;Body              | Island  |      |
| NR_027134              | TSS200                          |         |      |
| NM_000982;NR_026911    | TSS1500;TSS1500                 | N_Shore |      |
| NR_003016;NR_024031    | TSS1500;TSS1500                 | N_Shore |      |
| NM_175047;NR_003613;NM | 5'UTR;TSS1500;5'UTR             | S_Shore |      |
| NM_007023;NR_026995    | Body;TSS200                     | Island  |      |
| NM_014620;NR_003084;NM | 5'UTR;Body;Body                 | Island  |      |
| NR_002835;NM_005328    | Body;5'UTR                      | Island  |      |
| NR_027399;NR_027398;NM | TSS200;TSS200;TSS200            | Island  |      |
| NR_027822              | Body                            | Island  | DMR  |
| NR_026830              | Body                            | N_Shore | RDMR |
| NR_028389;NM_001106    | Body;Body                       | Island  |      |
| NM_138764;NM_004324;NM | TSS1500;TSS1500;TSS1500;TSS1500 | N_Shore |      |
| NM_021643;NM_021643;NR | 1stExon;5'UTR;Body              | Island  |      |
| NR_002776;NM_001145436 | Body;TSS1500;TSS1500;TSS1500    | Island  |      |
| NM_152520;NR_031659    | 5'UTR;TSS200                    | Island  |      |
| NR_026757              | Body                            | S_Shore |      |
| NR_003584;NR_002963    | TSS200;TSS1500                  | Island  |      |
| NR_024330              | Body                            | Island  | DMR  |
| NR_002995              | Body                            | Island  |      |
| NM_033028;NR_002780    | TSS1500;Body                    | N_Shore |      |
| NM_005378;NR_026766    | Body;TSS1500                    | Island  |      |
| NM_001123067;NM_016835 | 5'UTR;5'UTR;TSS1500;Body;5'UTR  | Island  | DMR  |
| NM_006041;NR_026880    | Body;Body                       | S_Shore | CDMR |
| NM_001085365;NR_026922 | Body;TSS1500                    | Island  |      |
| NR_028301;NR_028302;NR | (Body;Body;TSS200               | Island  | DMR  |
| NM_032741;NM_006913;NR | TSS1500;TSS200;TSS200           |         |      |
| NM_178040;NR_027949;NR | TSS1500;TSS1500;TSS1500;TSS1500 | N_Shore | RDMR |
| NR_024184;NR_024182;NR | (TSS1500;TSS1500;TSS1500        |         |      |
| NR_026550;NM_018442;NM | TSS1500;Body;TSS1500;TSS1500    | Island  |      |
| NR_024525;NM_003869;NM | TSS1500;1stExon;TSS1500;1stExon | Island  |      |
| NM_001139518;NM_001042 | TSS1500;TSS200;TSS200;TSS1500   | Island  |      |
| NR_026753;NM_031484    | Body;1stExon                    | Island  |      |
| NR_002814              | TSS200                          | Island  |      |
| NM_021253;NR_024052;NR | TSS1500;Body;Body               | N_Shore |      |
| NR_015431;NM_001145354 | TSS1500;5'UTR                   | Island  |      |
| NM_001040144;NR_033227 | TSS200;TSS200;TSS1500;TSS1500   | Island  |      |
| NR_024421;NR_024422    | Body;TSS200                     | Island  |      |
| NR_015450              | TSS1500                         | Island  |      |
| NM_144611;NR_023347;NR | 3'UTR;Body;Body                 |         |      |

|                         |                              |         |      |
|-------------------------|------------------------------|---------|------|
| NR_024483;NM_017829;NM  | TSS1500;Body;Body;TSS1500    | Island  |      |
| NR_004053;NM_003106     | Body;TSS200                  | N_Shore | DMR  |
| NR_029434;NM_002892;NR_ | TSS200;TSS1500;TSS200;TSS1   | Island  |      |
| NR_027253               | Body                         | N_Shore |      |
| NR_003716               | Body                         | Island  | DMR  |
| NR_024555;NM_014836;NR_ | Body;TSS200;Body;TSS200      | Island  |      |
| NR_024362;NR_024363;NR_ | (TSS1500;TSS1500;TSS1500     | Island  |      |
| NM_001144072;NM_177967  | Body;Body;Body               | S_Shore |      |
| NR_027447;NM_016219     | TSS200;TSS200                | Island  |      |
| NR_023350;NM_004766     | TSS1500;TSS1500              | Island  |      |
| NM_001164309;NR_028343; | 5'UTR;Body;5'UTR;5'UTR       | N_Shore | CDMR |
| NM_001145391;NM_001145  | TSS1500;Body;TSS1500;TSS1500 |         |      |
| NR_024520;NR_024519;NM_ | TSS200;TSS200;TSS200;TSS20   | Island  |      |
| NR_027141;NM_207009     | Body;Body                    | Island  |      |
| NR_027068               | TSS200                       | N_Shore |      |
| NM_004640;NR_003065;NM_ | 5'UTR;TSS1500;5'UTR          | N_Shore |      |
| NR_024330               | Body                         | Island  | DMR  |
| NR_001435               | Body                         | Island  |      |
| NR_026703               | Body                         |         |      |
| NM_031443;NM_001167935  | TSS1500;TSS1500;TSS1500;B    | Island  |      |
| NR_028044;NR_003512;NM_ | Body;Body;5'UTR;Body         | N_Shore |      |
| NR_003306               | TSS200                       |         |      |
| NR_024383;NR_015436     | Body;Body                    | N_Shore |      |
| NM_001099625;NM_001099  | 5'UTR;5'UTR;5'UTR;Body;5'U   | S_Shore | RDMR |
| NR_027387               | TSS1500                      | N_Shore |      |
| NR_024555;NR_024554     | Body;TSS1500                 | N_Shore |      |
| NR_026550;NM_001143674; | TSS1500;5'UTR;TSS200;TSS15   | Island  |      |
| NR_023313;NR_023312;NM_ | Body;Body;TSS1500            | Island  |      |
| NM_001040437;NM_001040  | 5'UTR;5'UTR;1stExon;TSS200;  | S_Shore |      |
| NR_027405;NM_006636;NM_ | Body;1stExon;5'UTR           | Island  |      |
| NR_028444;NM_006810     | TSS1500;TSS1500              | N_Shore |      |
| NR_033258;NM_014795;NM_ | Body;Body;Body               | Island  | DMR  |
| NM_005412;NR_029416;NR_ | TSS1500;TSS1500;TSS1500;T    | N_Shore |      |
| NR_028138               | Body                         | Island  |      |
| NM_003927;NR_002970;NM_ | Body;TSS1500;Body            | N_Shore |      |
| NM_021953;NR_027363;NR_ | TSS1500;Body;Body;TSS1500    | S_Shore |      |
| NM_023924;NR_027633;NM_ | TSS1500;TSS1500;TSS1500;B    | S_Shore |      |
| NR_027425               | Body                         | S_Shelf |      |
| NM_024814;NR_024199     | Body;Body                    | S_Shore | RDMR |
| NR_027463;NR_027462;NM_ | Body;Body;TSS200             | S_Shore |      |
| NR_003512;NM_001042376; | Body;Body;1stExon;5'UTR      |         |      |
| NR_028389;NM_001106     | Body;TSS1500                 | N_Shore | RDMR |
| NR_002942               | Body                         | Island  |      |
| NR_003013;NR_027058     | Body;Body                    | S_Shore |      |

|                                                           |                 |             |
|-----------------------------------------------------------|-----------------|-------------|
| NR_002325;NM_001012321; TSS1500;TSS1500;5'UTR             | S_Shore         |             |
| NM_001039465;NM_006925 Body;Body;TSS1500                  | S_Shore         | RDMR        |
| NR_028099;NM_025230;NM_ TSS1500;TSS1500;TSS1500;TSS1500   | N_Shore         |             |
| NR_021485                                                 | Body            | S_Shore DMR |
| NR_003142;NR_003020;NM_ TSS200;TSS1500;TSS200             | Island          |             |
| NR_024576;NM_001142628; Body;Body;Body;Body;Body          | S_Shore         |             |
| NR_027346;NR_027345                                       | TSS1500;TSS1500 |             |
| NR_024350;NM_001136497; TSS200;TSS200;TSS1500;TSS200      | N_Shore         |             |
| NR_027795                                                 | TSS200          |             |
| NM_001001420;NM_005903 5'UTR;5'UTR;5'UTR;Body             | Island          |             |
| NR_026757                                                 | TSS1500         | N_Shore     |
| NR_023362                                                 | TSS200          |             |
| NR_024612;NM_001137675                                    | TSS1500;TSS1500 | N_Shore     |
| NM_015001;NR_024279                                       | TSS1500;Body    | Island      |
| NR_024587;NM_001142673; TSS200;TSS200;TSS200;5'UTR        | Island          |             |
| NM_020866;NM_020866;NR_ 1stExon;5'UTR;Body                | S_Shore         |             |
| NM_001161562;NM_015028 1stExon;1stExon;5'UTR;1stExon      | Island          |             |
| NR_027068                                                 | Body            | N_Shore     |
| NR_027473;NM_012308                                       | Body;Body       |             |
| NM_001865;NR_029466                                       | Body;Body       |             |
| NR_026972;NR_026973                                       | Body;Body       | Island DMR  |
| NR_027788;NR_027789                                       | Body;Body       | Island      |
| NR_027276                                                 | Body            | CDMR        |
| NM_022114;NR_015440;NM_ TSS200;TSS1500;TSS200;TSS1500     | Island          |             |
| NR_001558                                                 | Body            | S_Shelf     |
| NM_138761;NM_138763;NR_ TSS200;TSS200;TSS200;TSS200       | Island          |             |
| NM_003292;NM_017847;NR_ TSS1500;TSS200;Body;TSS200        | Island          |             |
| NR_002188                                                 | TSS1500         | S_Shore     |
| NM_003143;NR_015392                                       | TSS200;TSS200   | Island      |
| NM_000800;NM_033136;NM_ 5'UTR;5'UTR;5'UTR;5'UTR;Body;Body |                 |             |
| NR_0207037;NR_0207038;NR_ 5'UTR;5'UTR;TSS200;1stExon;     | Island          |             |
| NR_026581;NM_005439                                       | TSS1500;TSS1500 | S_Shore     |
| NR_024383;NR_015436;NR_ ( Body;Body;Body                  |                 | RDMR        |
| NR_024588;NM_014741;NM_ Body;1stExon;5'UTR;1stExon;       | Island          |             |
| NM_080425;NM_001077490 TSS1500;TSS1500;3'UTR;TSS1500      | Island          | CDMR        |
| NM_001145666;NR_027265; TSS1500;TSS1500;TSS1500;TSS1500   | S_Shore         |             |
| NR_018412;NR_021908;NR_ 5'UTR;5'UTR;TSS1500;Body;1stExon  | N_Shore         |             |
| NM_018229;NR_026895;NM_ 5'UTR;Body;TSS1500;1stExon        | S_Shore         |             |
| NR_031766;NM_017899;NM_ Body;Body;Body                    | N_Shore         |             |
| NR_015441                                                 | Body            | Island      |
| NR_030159;NM_001143979; Body;1stExon;5'UTR;TSS1500        |                 |             |
| NR_024409;NM_003262;NR_ Body;TSS1500;Body                 | N_Shore         |             |
| NR_029435;NR_029434;NM_ Body;Body;TSS1500;TSS1500         | Island          |             |
| NM_001142587;NM_001142 TSS1500;TSS1500;TSS1500;Body       | N_Shore         |             |

|                                                   |                             |         |
|---------------------------------------------------|-----------------------------|---------|
| NR_027430;NM_025125;NR_Body;1stExon;Body;Body;Boc | Island                      |         |
| NR_024588;NM_014741;NM_Body;1stExon;5'UTR;TSS1500 | Island                      |         |
| NR_003512;NR_028044;NM_Body;TSS1500;Body;5'UTR;TS | Island                      |         |
| NM_001164821;NM_024770                            | Body;1stExon;5'UTR;Body;Bo  | S_Shore |
| NR_026781;NR_026780                               | Body;Body                   | S_Shore |
| NM_153262;NR_027458;NR_Body;Body;Body;Body;Body;f | Island                      |         |
| NM_001146069;NR_015453;TSS1500;TSS1500;TSS1500    | Island                      |         |
| NM_053005;NR_021489                               | Body;Body                   | N_Shore |
| NR_015411                                         | Body                        | S_Shore |
| NR_028044;NR_003512;NM_Body;Body;5'UTR;TSS1500;Bc | N_Shore                     | RDMR    |
| NM_002931;NR_029633                               | TSS1500;TSS1500             | N_Shore |
| NR_026866                                         | TSS1500                     |         |
| NR_015440                                         | Body                        | Island  |
| NR_026698;NM_002264                               | Body;5'UTR                  | Island  |
| NR_023350;NM_004766                               | TSS200;TSS200               | Island  |
| NR_003128                                         | Body                        |         |
| NR_015339                                         | Body                        | N_Shore |
| NR_024519;NR_024518;NR_(                          | Body;Body;Body;1stExon;1stl | Island  |
| NR_031592;NM_007065                               | TSS1500;TSS1500             | Island  |
| NM_174917;NR_023316;NM                            | Body;Body;Body              | S_Shelf |
| NR_002809                                         | Body                        | Island  |
| NR_024585;NM_004747                               | TSS1500;1stExon             | Island  |
| NR_026989;NR_026985;NR_(                          | Body;TSS200;Body;TSS200;TS  | Island  |
| NR_033255;NM_012145;NM                            | TSS1500;TSS1500;TSS1500     | S_Shore |
| NR_027276                                         | TSS200                      | CDMR    |
| NR_027249;NM_003299                               | Body;TSS1500                | Island  |
| NR_023918;NR_023919                               | TSS1500;TSS1500             | N_Shore |
| NM_001007139;NR_003512;                           | TSS200;Body;Body            |         |
| NR_027633;NM_001009877;                           | Body;Body;Body              |         |
| NR_004407                                         | TSS1500                     |         |
| NR_003551                                         | TSS1500                     | Island  |
| NM_001128325;NR_033182;                           | Body;Body;Body              | Island  |
| NM_001016;NR_002436                               | Body;TSS200                 | S_Shelf |
| NR_003614;NM_018991;NM                            | TSS1500;5'UTR;5'UTR         | Island  |
| NM_001036646;NM_030816                            | Body;TSS1500;Body;Body;Bo   | S_Shore |
| NR_024041;NM_152618                               | TSS1500;5'UTR               | S_Shore |
| NM_172209;NM_003190;NM                            | 3'UTR;3'UTR;TSS1500;TSS150  | S_Shore |
| NR_028040;NR_028038;NM                            | Body;Body;Body;Body         | Island  |
| NR_030170                                         | TSS200                      |         |
| NR_003265                                         | TSS200                      | Island  |
| NR_026878                                         | Body                        | N_Shore |
| NR_028437;NR_028436;NM                            | TSS200;TSS200;TSS200        | N_Shore |
| NM_000535;NM_006303;NR                            | Body;TSS1500;Body           | Island  |
| NR_026676                                         | Body                        | S_Shore |
|                                                   |                             | RDMR    |
|                                                   |                             | CDMR    |
|                                                   |                             | DMR     |
|                                                   |                             | RDMR    |

|                                                                       |                                                                                                       |                              |      |
|-----------------------------------------------------------------------|-------------------------------------------------------------------------------------------------------|------------------------------|------|
| NR_026923;NR_026925;NR_003264                                         | Body;TSS200;TSS200<br>TSS1500                                                                         | Island<br>Island             |      |
| NR_033201;NR_033202                                                   | TSS1500;TSS1500                                                                                       | N_Shelf                      |      |
| NM_001046;NR_015360                                                   | 1stExon;TSS1500                                                                                       | Island                       |      |
| NR_031646;NM_015678;NR_029461;NM_007161;NM_001143766;NM_001143        | Body;Body;TSS200<br>Body;TSS200;5'UTR;5'UTR;TSS200;TSS200;Body;5'UTR<br>5'UTR;5'UTR;5'UTR;5'UTR;5'UTR | N_Shore<br>N_Shore           | RDMR |
| NR_031612;NR_003367                                                   | TSS1500;Body                                                                                          |                              |      |
| NR_003667;NM_139235;NR_024555;NR_024554                               | Body;TSS1500;TSS1500<br>TSS1500;TSS1500                                                               | Island                       |      |
| NR_003042;NM_004582                                                   | TSS1500;TSS200                                                                                        |                              |      |
| NR_024488                                                             | Body                                                                                                  | Island                       |      |
| NM_015509;NR_024260                                                   | TSS1500;TSS1500                                                                                       | N_Shore                      |      |
| NR_033203;NR_033204;NR_003013;NR_027058                               | Body;Body;Body;Body;TSS200<br>TSS1500;TSS200                                                          | Island<br>Island             |      |
| NR_030170                                                             | TSS200                                                                                                |                              |      |
| NR_026550;NM_018442;NM_002136;NR_002944;NM_029969;NR_030160;NR_004053 | TSS1500;TSS1500;5'UTR;TSS1500<br>Body;Body;Body<br>TSS1500;TSS1500;TSS200                             | Island<br>S_Shore            | RDMR |
| NR_026676                                                             | Body                                                                                                  | N_Shore                      | CDMR |
| NR_003127;NR_024055;NR_028514;NM_130766;NM_020752;NR_027333           | Body;Body;Body;Body<br>Body;TSS1500;TSS1500;TSS1500<br>Body;TSS200                                    | Island<br>S_Shore<br>Island  | DMR  |
| NR_002776;NM_001145436;NR_027308;NM_005919;NR_026814                  | Body;TSS1500;TSS1500;TSS1500<br>Body;5'UTR;5'UTR;Body<br>Body                                         | Island<br>N_Shore            |      |
| NR_002328;NM_003846                                                   | TSS200;TSS200                                                                                         | Island                       |      |
| NR_002834                                                             | Body                                                                                                  | Island                       |      |
| NR_026669;NM_014841                                                   | TSS200;TSS200                                                                                         | Island                       |      |
| NM_032359;NR_031662                                                   | Body;Body                                                                                             | Island                       |      |
| NM_001136473;NM_004862                                                | 5'UTR;TSS200;5'UTR;Body                                                                               | Island                       |      |
| NM_005340;NR_024611;NR_001164821;NM_024770                            | Body;Body;Body<br>Body;1stExon;5'UTR;Body;Body                                                        | Island<br>S_Shore            |      |
| NR_027463;NM_133491;NR_024368                                         | Body;TSS200;TSS200<br>TSS1500                                                                         | Island                       |      |
| NR_027026;NR_027028;NR_028044;NR_003512;NM_023382                     | Body;Body;Body<br>Body;Body;5'UTR;TSS1500;Body<br>TSS1500                                             | Island<br>N_Shore<br>N_Shore |      |
| NM_178156;NM_004480;NR_027399;NR_027398;NM_002971;NM_080686           | 5'UTR;1stExon;5'UTR;5'UTR;1stExon<br>TSS1500;TSS1500;TSS1500<br>TSS1500;Body                          | Island<br>S_Shore<br>S_Shore |      |
| NR_026814                                                             | Body                                                                                                  |                              |      |
| NR_003369                                                             | Body                                                                                                  | Island                       |      |



|                         |                               |         |      |
|-------------------------|-------------------------------|---------|------|
| NR_024114;NM_175888     | Body;5'UTR                    | S_Shore |      |
| NR_027910;NM_001740;NM  | TSS1500;TSS1500;TSS1500       | N_Shore |      |
| NM_001018108;NR_031695  | Body;Body                     | S_Shore |      |
| NM_001099737;NM_032332  | 5'UTR;5'UTR;TSS200;Body;1st   | Island  |      |
| NR_027910;NM_007088;NM  | Body;3'UTR;Body               |         |      |
| NM_001042540;NR_024388; | Body;TSS1500;Body             | Island  |      |
| NM_012459;NM_003002;NR  | Body;TSS1500;Body             | N_Shore |      |
| NR_026570;NM_014268;NM  | TSS1500;TSS1500;5'UTR;Body    | N_Shore |      |
| NR_000008;NR_002560;NR  | (TSS1500;TSS1500;Body;Body    | N_Shelf |      |
| NR_024399;NM_002461;NR  | Body;TSS1500;Body             | Island  |      |
| NR_024431;NR_024429;NR  | (TSS1500;TSS1500;TSS1500;TSS  | Island  |      |
| NM_001033002;NR_027684; | Body;Body;Body;Body;Body;Body | S_Shore |      |
| NR_027487;NR_026899     | Body;Body                     | Island  |      |
| NM_153450;NM_001144012  | TSS200;TSS1500;TSS1500;TSS    | Island  |      |
| NR_024547;NM_003876     | TSS1500;TSS1500               | S_Shore |      |
| NM_017589;NR_029840;NR  | TSS200;TSS1500;TSS1500        | N_Shore |      |
| NM_001141970;NR_024517; | TSS1500;TSS1500;TSS1500;TSS   | S_Shore |      |
| NR_030396;NM_016091     | TSS1500;TSS1500               | N_Shore |      |
| NR_024588;NM_014741;NM  | Body;1stExon;5'UTR;TSS1500    | Island  |      |
| NM_206594;NM_206595;NM  | Body;Body;Body;Body;Body      | N_Shore |      |
| NM_001024380;NM_031940  | TSS200;TSS200;TSS1500;TSS1    | Island  |      |
| NR_026728;NM_001145025; | TSS1500;TSS1500;TSS1500       | S_Shore |      |
| NR_028024;NM_001039618; | TSS200;TSS200;TSS200;TSS20    | Island  |      |
| NR_026719               | Body                          | N_Shore |      |
| NR_027692;NM_002636;NM  | TSS1500;TSS1500;TSS1500       | Island  |      |
| NR_003948               | Body                          |         |      |
| NM_001001937;NR_026978; | 5'UTR;TSS1500;TSS1500         | N_Shore | RDMR |
| NM_001143682;NR_026554; | TSS1500;TSS1500;TSS1500       |         |      |
| NR_031660;NR_003695;NR  | (Body;Body;Body;Body;TSS1500  | S_Shore | RDMR |
| NM_014596;NM_170783;NR  | TSS1500;TSS1500;Body          | N_Shore |      |
| NM_030573;NM_001008695  | Body;Body;TSS1500;TSS1500     | N_Shore |      |
| NM_032271;NR_002736     | TSS200;TSS1500                | Island  |      |
| NM_006365;NR_029691     | 5'UTR;TSS1500                 | Island  |      |
| NR_021490;NR_021491     | Body;Body                     | Island  |      |
| NM_001099737;NM_001099  | 1stExon;5'UTR;TSS200;Body     | S_Shore |      |
| NR_027654;NM_005585     | Body;1stExon                  | Island  |      |
| NR_000034               | Body                          | Island  |      |
| NR_015433               | Body                          | Island  |      |
| NM_001141970;NR_024517; | TSS1500;TSS1500;TSS1500;TSS   | S_Shore |      |
| NM_001145308;NM_001145  | TSS200;TSS200;5'UTR;TSS1500   | N_Shore | RDMR |
| NR_003191               | TSS1500                       | Island  |      |
| NM_021253;NR_024052;NR  | TSS1500;Body;Body;TSS1500     | N_Shore |      |
| NR_002935;NM_170606     | TSS200;TSS1500                |         |      |
| NM_001164246;NM_017847  | TSS1500;TSS1500;Body;TSS1500  | N_Shore |      |

|                           |                                 |         |      |
|---------------------------|---------------------------------|---------|------|
| NR_024581;NM_024701       | Body;Body                       | Island  |      |
| NM_001039618;NM_001039    | 1stExon;5'UTR;Body;Body;Bo      | Island  |      |
| NR_002612                 | Body                            | Island  |      |
| NM_001686;NR_002737       | TSS200;TSS1500                  | S_Shore |      |
| NM_006392;NR_003078;NR_   | Body;TSS200;Body;TSS1500        | S_Shore |      |
| NR_028074;NM_014828;NM_   | TSS200;TSS200;TSS1500;TSS2      | Island  |      |
| NR_024383;NR_015436;NR_ ( | Body;Body;TSS1500               | N_Shore |      |
| NR_024254                 | TSS1500                         | Island  |      |
| NR_015454;NM_002359       | TSS200;TSS200                   | Island  |      |
| NM_032359;NM_182909;NR_   | Body;5'UTR;Body;5'UTR           |         |      |
| NM_080425;NM_001077490    | TSS1500;TSS1500;3'UTR;TSS1      | Island  | CDMR |
| NM_037370;NM_012142;NR_   | TSS200;Body;Body;Body           | S_Shore |      |
| NM_001880;NR_030630       | TSS1500;TSS1500                 | Island  |      |
| NM_001141970;NR_024517;   | TSS1500;TSS1500;TSS1500;TSS     | S_Shore |      |
| NM_001024381;NM_001024    | 1stExon;5'UTR;TSS1500;1stEx     | Island  |      |
| NR_024053;NM_172016;NM_   | TSS1500;5'UTR;5'UTR;TSS150      | S_Shore |      |
| NM_018691;NM_001135037    | 5'UTR;TSS1500;TSS1500;TSS1      | Island  |      |
| NM_031443;NM_001167935    | TSS1500;TSS1500;TSS1500;TSS     | N_Shore |      |
| NM_032825;NR_027239;NM_   | 5'UTR;TSS1500;TSS1500;TSS1      | S_Shore |      |
| NM_003426;NR_003253       | TSS200;TSS200                   | Island  |      |
| NM_005916;NM_182776;NR_   | Body;Body;TSS200;Body           |         |      |
| NM_001011537;NR_027840;   | 5'UTR;TSS1500;1stExon;TSS1      | Island  |      |
| NM_001144072;NR_026644;   | 5'UTR;TSS200;TSS200;1stExo      | Island  |      |
| NM_001167869;NM_001167    | 5'UTR;TSS1500;5'UTR;Body;5      | Island  |      |
| NR_015448                 | Body                            |         | CDMR |
| NR_023938                 | Body                            |         |      |
| NR_027253;NM_006317       | Body;TSS1500                    | N_Shore |      |
| NM_020120;NR_027671       | TSS1500;TSS1500                 | N_Shore |      |
| NM_133378;NM_133432;NM_   | Body;Body;Body;Body;Body        |         |      |
| NR_023349;NM_052965;NM_   | TSS1500;TSS1500;TSS1500         | N_Shore |      |
| NM_006913;NM_032741;NR_   | 1stExon;TSS1500;Body;5'UTR      |         |      |
| NR_004380;NR_002995       | Body;TSS1500                    | Island  |      |
| NR_028044;NR_003512;NM_   | Body;Body;5'UTR;Body            | S_Shore |      |
| NM_004640;NR_003065;NM_   | 5'UTR;TSS1500;5'UTR             | N_Shore |      |
| NR_002165                 | TSS200                          |         |      |
| NM_001143768;NM_182755    | 5'UTR;5'UTR;1stExon;1stExon     | Island  |      |
| NR_027766;NR_002949       | TSS1500;TSS1500                 | N_Shore |      |
| NM_001166284;NR_029402;   | TSS1500;TSS1500;TSS1500;TSS     | Island  |      |
| NR_033233;NM_001075098    | TSS200;TSS200                   | Island  |      |
| NM_006913;NR_003129       | Body;Body                       |         |      |
| NR_027045;NM_005026       | Body;5'UTR                      | Island  |      |
| NR_024610;NM_005340;NR_   | TSS200;TSS200;TSS200            | S_Shore |      |
| NR_024596;NR_024597;NM_   | TSS1500;Body;1stExon;Body;5'UTR |         |      |
| NM_020196;NM_001171155    | TSS1500;1stExon;5'UTR;Body      | S_Shore |      |

|                         |                             |         |      |
|-------------------------|-----------------------------|---------|------|
| NR_027850;NM_006554;NM  | Body;1stExon;5'UTR          | Island  |      |
| NR_028335               | Body                        |         |      |
| NM_178040;NR_027948;NR_ | 5'UTR;Body;Body;5'UTR;Body  | S_Shore |      |
| NR_027300               | Body                        | Island  |      |
| NR_003671;NM_007175     | Body;Body                   |         |      |
| NM_001032293;NR_030362; | TSS1500;TSS200;TSS1500;TSS  | N_Shore |      |
| NR_004380;NR_002995     | TSS1500;TSS1500             | Island  |      |
| NM_001046;NR_015360     | TSS1500;TSS200              | Island  |      |
| NM_012383;NR_023352;NM  | Body;TSS1500;TSS1500;TSS15  | S_Shore |      |
| NR_023383               | Body                        | N_Shore |      |
| NR_029610               | TSS1500                     |         |      |
| NR_023344               | TSS1500                     | S_Shore |      |
| NR_027433               | Body                        | N_Shore |      |
| NM_015327;NR_026678;NM  | TSS1500;Body;TSS1500        |         |      |
| NM_001037663;NM_001959  | Body;Body;TSS1500;TSS1500   | S_Shore |      |
| NR_015375;NM_001018056; | TSS1500;Body;Body           | Island  |      |
| NM_006026;NR_026991     | TSS1500;Body                | Island  |      |
| NR_001591               | Body                        | Island  |      |
| NM_001042540;NR_024388; | Body;TSS1500;Body           | Island  |      |
| NR_023386               | Body                        | N_Shore |      |
| NR_003038;NR_003044;NR_ | (Body;TSS1500;TSS1500       | Island  |      |
| NR_003531;NR_003530;NR_ | (Body;Body;Body             |         |      |
| NM_001162861;NM_001162  | TSS1500;TSS1500;TSS1500;T   | Island  |      |
| NR_015433               | TSS1500                     | N_Shore |      |
| NR_028032               | Body                        | Island  |      |
| NR_002785               | Body                        | N_Shelf |      |
| NM_001099626;NM_001099  | 1stExon;5'UTR;5'UTR;5'UTR;B | S_Shore |      |
| NM_001135179;NM_001135  | TSS1500;TSS1500;Body;TSS15  | Island  |      |
| NR_003551               | TSS1500                     | N_Shore |      |
| NR_027005               | Body                        | Island  |      |
| NR_015433               | TSS200                      | Island  |      |
| NR_015404;NM_003668;NM  | Body;TSS200;TSS200          | Island  |      |
| NM_001145308;NM_001145  | 5'UTR;1stExon;5'UTR;Body;1s | Island  |      |
| NM_001011537;NM_001145  | TSS200;1stExon;5'UTR;TSS15  | Island  | RDMR |
| NR_024233;NM_199437;NM  | TSS1500;5'UTR;5'UTR         | Island  |      |
| NR_027053               | TSS1500                     |         |      |
| NR_028323;NM_080592;NM  | TSS1500;Body;TSS1500;5'UTR  | S_Shore |      |
| NR_023319;NR_023318;NM  | Body;Body;Body              | Island  |      |
| NR_026712;NM_012423     | TSS1500;TSS1500             | N_Shore |      |
| NR_033258;NM_014795;NM  | Body;5'UTR;1stExon;1stExon; | N_Shelf | DMR  |
| NM_198149;NR_030775;NM  | 5'UTR;Body;1stExon          |         |      |
| NR_030725;NR_002909;NR_ | (Body;Body;Body;5'UTR       |         |      |
| NM_000520;NR_027262     | TSS1500;Body                | S_Shore |      |
| NR_026883;NR_026885;NR_ | (Body;Body;TSS200           |         |      |

|                         |                                                      |         |      |
|-------------------------|------------------------------------------------------|---------|------|
| NR_024012;NM_001129884; | TSS1500;TSS1500;TSS1500                              | N_Shore |      |
| NR_003109;NM_017846     | TSS200;TSS200                                        | Island  |      |
| NR_026876               | Body                                                 | Island  |      |
| NR_003923               | Body                                                 |         |      |
| NR_026873               | Body                                                 | S_Shore |      |
| NM_004028;NM_001650;NR  | TSS1500;Body;TSS1500                                 | S_Shore |      |
| NR_003667;NM_016410;NM  | Body;TSS200;TSS200                                   | Island  |      |
| NR_003111               | TSS200                                               |         |      |
| NR_024430;NR_029671     | Body;Body                                            |         |      |
| NM_004197;NM_032454;NM  | Body;Body;TSS1500;Body                               | Island  |      |
| NR_003512;NM_001127598; | Body;Body;Body;Body                                  | S_Shore |      |
| NR_024377               | TSS1500                                              |         |      |
| NM_001165030;NR_028491; | TSS1500;TSS1500;TSS1500                              | S_Shore |      |
| NM_001144766;NM_001001  | TSS200;TSS1500;Body;Body                             | Island  |      |
| NR_023349;NM_052965;NM  | TSS200;TSS200;TSS200                                 | N_Shore |      |
| NR_027299;NM_001145769; | TSS1500;TSS1500;TSS1500;B                            | Island  |      |
| NR_024233;NM_020228;NM  | Body;TSS200;TSS200                                   | Island  |      |
| NR_026940;NM_014904;NR  | Body;TSS1500;Body;Body                               | Island  |      |
| NR_002323               | Body                                                 | S_Shore |      |
| NM_182935;NR_003090     | 5'UTR;Body                                           | N_Shelf |      |
| NM_003391;NR_024047     | Body;Body                                            | N_Shore | CDMR |
| NR_024600;NM_138929;NM  | Body;5'UTR;5'UTR;Body                                | Island  |      |
| NM_001048224;NM_001048  | 5'UTR;5'UTR;TSS1500;TSS150                           | Island  |      |
| NM_001144766;NR_029431; | TSS1500;TSS200;TSS200;5'UT                           | S_Shore |      |
| NM_001146016;NM_001146  | TSS1500;TSS1500;TSS1500;TSS1500;TSS1500;TSS1500      |         |      |
| NR_003955               | Body                                                 | Island  |      |
| NM_001146310;NR_024445; | Body;Body;3'UTR                                      | Island  |      |
| NR_027910;NM_007088;NM  | Body;1stExon;1stExon                                 | Island  |      |
| NM_020476;NM_020478;NM  | Body;Body;Body;Body;Body;Body;Body;Body;TSS1500;Body |         |      |
| NR_029192;NR_024148;NR_ | (TSS200;TSS1500;TSS1500;TSS1500                      |         |      |
| NM_152618;NR_024041     | TSS1500;Body                                         | N_Shore |      |
| NR_024260;NM_015509     | TSS200;TSS200                                        | Island  |      |
| NR_027093;NR_027092;NR_ | (TSS1500;TSS200;TSS200                               | Island  | DMR  |
| NM_001656;NM_024941;NM  | TSS200;TSS1500;TSS200;TSS2                           | Island  |      |
| NM_017670;NR_003089     | Body;Body                                            | Island  |      |
| NR_003615               | Body                                                 | S_Shore |      |
| NR_024542;NR_024543;NR_ | (TSS1500;TSS1500;TSS1500                             | Island  |      |
| NR_024427;NM_001137605  | TSS200;TSS200                                        |         |      |
| NM_003027;NR_026799     | TSS1500;TSS1500                                      | N_Shore | CDMR |
| NM_012399;NR_026963;NR  | Body;TSS1500;TSS1500                                 | Island  |      |
| NM_003466;NM_013951;NM  | Body;Body;Body;Body;Body;B                           | Island  |      |
| NM_001100619;NR_023359  | 1stExon;Body                                         | Island  |      |
| NM_018177;NR_027277     | TSS1500;Body                                         | N_Shore |      |
| NR_028496               | TSS200                                               |         |      |

|                         |                               |         |      |
|-------------------------|-------------------------------|---------|------|
| NR_024032               | TSS1500                       |         |      |
| NR_027054               | TSS200                        | Island  | DMR  |
| NR_024412;NR_015442     | TSS200;TSS200                 |         |      |
| NM_001037663;NM_001959  | Body;Body;TSS1500;TSS1500     | S_Shore |      |
| NR_030724;NM_001167604; | TSS200;TSS200;TSS200          | Island  |      |
| NR_003954;NM_024694     | TSS200;Body                   |         |      |
| NM_001161563;NM_001161  | Body;Body;Body;Body;Body;E    | N_Shore | RDMR |
| NR_031571               | TSS200                        |         |      |
| NR_027668;NM_001160225; | Body;Body;Body;Body;Body;Body |         |      |
| NM_001134888;NR_029965; | 1stExon;TSS200;TSS1500        | N_Shore |      |
| NR_028044;NR_003512;NM_ | Body;Body;5'UTR;TSS1500;Bc    | S_Shore |      |
| NR_003094;NR_003092;NR_ | (TSS1500;TSS1500;TSS1500;T    | S_Shore |      |
| NR_031592;NM_007065     | TSS200;TSS200                 | Island  |      |
| NR_026728;NM_018217;NM_ | TSS200;TSS200;TSS200          | Island  |      |
| NR_003684;NM_198216;NM_ | TSS1500;Body;Body             |         |      |
| NR_024056;NR_024057;NR_ | (TSS1500;TSS1500;TSS200;TSS   | N_Shore |      |
| NR_002578;NR_003942;NR_ | (Body;TSS1500;TSS1500;TSS1    | N_Shore |      |
| NR_027308;NM_005919;NM_ | Body;5'UTR;TSS1500;Body       | Island  |      |
| NR_027473;NM_012308     | Body;Body                     |         |      |
| NM_001145354;NR_015431  | TSS200;TSS1500                | Island  |      |
| NR_002971;NM_080686     | TSS1500;Body                  | S_Shore |      |
| NR_024045               | TSS1500                       | Island  |      |
| NM_001003809;NR_024101; | Body;Body;Body                |         |      |
| NM_198055;NM_003422;NM_ | 5'UTR;1stExon;1stExon;5'UTR   | Island  |      |
| NR_002329;NR_002330;NM_ | TSS1500;Body;1stExon;1stExc   | N_Shore |      |
| NR_024170;NM_021970     | TSS200;TSS200                 |         |      |
| NR_026703               | TSS200                        |         |      |
| NM_024721;NR_024360     | 5'UTR;Body                    | S_Shore | CDMR |
| NR_026906;NR_026905     | Body;Body                     |         |      |
| NR_027663               | TSS200                        | Island  |      |
| NR_024280               | TSS1500                       |         |      |
| NR_015397               | TSS1500                       |         |      |
| NR_026878               | Body                          | N_Shore | RDMR |
| NR_027645;NR_024126;NR_ | (TSS1500;TSS1500;TSS1500;T    | S_Shore |      |
| NR_002829               | TSS1500                       | N_Shore | RDMR |
| NR_027105;NR_027106     | Body;TSS1500                  |         |      |
| NM_001039355;NR_029906; | 1stExon;TSS1500;5'UTR         | Island  |      |
| NR_029380;NM_006562     | Body;TSS1500                  | Island  | DMR  |
| NR_029409;NM_019009     | Body;TSS1500                  | S_Shore |      |
| NR_024453               | Body                          | S_Shore | RDMR |
| NR_002563;NM_001012664; | TSS1500;TSS200;TSS200;TSS1    | N_Shore |      |
| NM_015113;NR_023347;NM_ | TSS1500;Body;Body;Body        | Island  |      |
| NR_016021;NM_032811     | TSS1500;TSS1500               | N_Shore |      |
| NR_003316               | TSS1500                       |         |      |

|                         |                             |         |      |
|-------------------------|-----------------------------|---------|------|
| NR_001588;NR_024111;NR_ | (TSS200;TSS200;TSS200;TSS15 | Island  |      |
| NR_033258;NM_014795;NM_ | Body;5'UTR;5'UTR            | Island  | DMR  |
| NR_024423;NR_024424     | Body;TSS1500                | Island  |      |
| NM_001130136;NR_027073; | 5'UTR;TSS1500;TSS200;TSS20  | Island  |      |
| NR_027473;NM_012308     | Body;Body                   |         |      |
| NR_030174               | TSS1500                     |         |      |
| NR_002809               | Body                        | S_Shore |      |
| NR_030369;NM_138501     | TSS1500;TSS1500             | Island  |      |
| NR_015439;NM_018227     | Body;TSS200                 | Island  |      |
| NM_001141969;NR_024517; | 5'UTR;Body;Body;5'UTR       | N_Shore |      |
| NR_028323;NM_080592;NM_ | TSS1500;Body;TSS1500;5'UTR  | Island  |      |
| NM_002106;NR_002799     | TSS1500;Body                | S_Shore |      |
| NR_024195;NM_001135732; | TSS1500;TSS1500;TSS1500;TSS | N_Shore |      |
| NR_000015;NR_000024;NM_ | TSS200;TSS1500;Body         | Island  |      |
| NR_015427               | Body                        | Island  |      |
| NM_001042383;NM_015391  | TSS200;5'UTR;Body;TSS1500;  | Island  |      |
| NR_028024;NM_001039618; | TSS200;TSS200;TSS200;TSS20  | Island  |      |
| NM_014596;NM_170783;NR_ | TSS1500;TSS1500;Body        | N_Shore |      |
| NM_138764;NM_004324;NM_ | TSS1500;TSS1500;TSS1500;TSS | N_Shore |      |
| NR_014937;NR_003252     | Body;TSS1500                | Island  |      |
| NM_019605;NR_024337     | 5'UTR;Body                  | Island  |      |
| NM_001129884;NR_024012; | TSS200;TSS200;TSS200        | Island  |      |
| NR_003594;NM_172239     | Body;1stExon                | Island  |      |
| NR_026583               | Body                        |         |      |
| NM_016649;NM_024120;NM_ | TSS200;TSS200;TSS200;TSS20  | Island  |      |
| NR_027119;NR_027118;NM_ | TSS200;TSS200;Body          |         |      |
| NR_003525               | TSS1500                     | Island  |      |
| NM_005510;NM_004197;NM_ | 5'UTR;Body;Body;1stExon;Bo  | Island  |      |
| NM_001018056;NM_003383  | 1stExon;5'UTR;1stExon;5'UTR | Island  |      |
| NR_003142;NM_002952;NR_ | Body;TSS1500;TSS200         | Island  |      |
| NR_024367               | TSS1500                     |         |      |
| NR_024184;NR_024182;NR_ | (TSS1500;TSS1500;TSS1500    |         |      |
| NR_027126;NM_138777;NR_ | Body;TSS200;Body;5'UTR;TSS  | Island  |      |
| NR_027042               | Body                        |         |      |
| NM_001042540;NR_024388; | Body;TSS1500;Body           | N_Shore |      |
| NR_026940;NM_014904;NR_ | Body;TSS1500;Body;Body      | S_Shore |      |
| NR_026732;NR_026731     | Body;Body                   | S_Shore |      |
| NM_001142273;NM_015282  | Body;Body;Body;TSS1500      | Island  |      |
| NR_015380;NM_130786     | TSS1500;Body                | Island  |      |
| NR_002950;NM_017822     | Body;Body                   |         |      |
| NM_003027;NR_026799     | TSS1500;TSS1500             | N_Shore | CDMR |
| NR_027269               | TSS1500                     | S_Shore |      |
| NM_001141970;NR_024517; | TSS1500;TSS1500;TSS1500;TSS | S_Shore |      |
| NR_026550;NM_001143674; | TSS1500;5'UTR;TSS200;TSS15  | Island  |      |

|                                                                                           |                                    |         |      |
|-------------------------------------------------------------------------------------------|------------------------------------|---------|------|
| NR_027293                                                                                 | TSS1500                            |         |      |
| NR_029383;NM_175854;NM_026815                                                             | Body;TSS1500;TSS1500               | N_Shore |      |
| NR_027006;NR_002829                                                                       | Body                               | Island  |      |
| NR_030627;NM_014687;NM_004640;NR_003065;NM_207354;NR_030767                               | TSS1500;TSS1500                    | N_Shore | RDMR |
| NR_028044;NR_003512;NM_001033088;NR_028052                                                | TSS1500;Body;Body                  |         |      |
| NR_030299                                                                                 | 5'UTR;TSS1500;5'UTR                | N_Shore |      |
| NR_027663                                                                                 | Body;Body                          | Island  |      |
| NM_022771;NM_001146213                                                                    | Body;Body;5'UTR;Body               | S_Shore | RDMR |
| NM_015913;NM_001136497                                                                    | TSS200;TSS1500;TSS1500;TSS1500     | N_Shore |      |
| NR_026871;NM_001145210                                                                    | TSS1500;TSS1500                    | S_Shore |      |
| NR_001289;NR_001295                                                                       | TSS1500;TSS1500                    |         |      |
| NM_001142464;NR_024551;                                                                   | 5'UTR;TSS200;5'UTR;5'UTR           | Island  |      |
| NM_178040;NR_027949;NR_013349;NR_026598                                                   | TSS1500;TSS1500;TSS1500;TSS1500    | N_Shore | RDMR |
| NR_024252                                                                                 | Body;Body                          | Island  |      |
| NM_001163484;NM_025230                                                                    | 5'UTR;5'UTR;TSS200;Body;TS         | S_Shore |      |
| NR_003679                                                                                 | Body                               | N_Shore | RDMR |
| NM_001127213;NR_026913;                                                                   | 5'UTR;TSS1500;5'UTR                | Island  | DMR  |
| NR_024409;NM_003262;NR_024194;NR_024195;NM_028050;NR_028051;NR_024416;NR_015401;NR_024279 | Body;TSS1500;Body                  | N_Shore |      |
| NR_024194;NR_024195;NM_028050;NR_028051;NR_024416;NR_015401;NR_024279                     | Body;Body;Body;Body;Body;Body;Body | Island  |      |
| NR_028050;NR_028051;NR_024416;NR_015401;NR_024279                                         | Body;Body;Body;Body                | Island  |      |
| NR_024416;NR_015401;NR_024279                                                             | TSS200;Body;Body                   | Island  |      |
| NR_024279                                                                                 | Body                               | Island  |      |
| NM_001145025;NM_018217                                                                    | Body;Body;Body                     | N_Shore |      |
| NR_027771                                                                                 | Body                               | Island  |      |
| NR_027333;NM_020752                                                                       | Body;TSS200                        | Island  |      |
| NR_027335;NR_027336                                                                       | TSS1500;TSS1500                    |         |      |
| NR_002729                                                                                 | Body                               | S_Shelf |      |
| NR_024271                                                                                 | TSS200                             | Island  |      |
| NM_001145268;NM_001145                                                                    | TSS200;TSS200;TSS200               | N_Shore |      |
| NM_003391;NR_024047                                                                       | TSS1500;TSS1500                    | Island  | DMR  |
| NM_001144766;NR_029431;                                                                   | TSS1500;TSS1500;TSS1500;5'         | N_Shore |      |
| NM_006151;NR_027647;NM_030631;NM_001171170                                                | Body;Body;Body                     | Island  |      |
| NM_002136;NR_002944;NM_021485                                                             | Body;Body;Body                     | Island  | DMR  |
| NR_021485                                                                                 | TSS1500;TSS1500;TSS1500;TSS1500    | Island  |      |
| NR_024418                                                                                 | Body                               | Island  |      |
| NM_001164821;NM_024770                                                                    | TSS1500;5'UTR;TSS1500;TSS1500      | N_Shore |      |
| NM_006026;NR_026991                                                                       | TSS200;Body                        | Island  |      |
| NR_027504                                                                                 | Body                               | Island  |      |

|                        |                                 |         |      |
|------------------------|---------------------------------|---------|------|
| NR_002956;NM_014765    | TSS1500;TSS200                  | Island  |      |
| NR_027148              | TSS200                          |         |      |
| NM_000990;NR_002977    | Body;TSS1500                    | S_Shore |      |
| NR_027105;NR_027106    | Body;TSS1500                    |         |      |
| NR_027410              | Body                            | Island  | DMR  |
| NM_003295;NR_024458    | TSS200;TSS200                   | Island  |      |
| NR_024255;NM_002051;NM | TSS1500;TSS1500;TSS1500;TSS1500 | Island  | DMR  |
| NR_026862              | TSS1500                         | S_Shore |      |
| NR_027692;NM_002636;NM | Body;Body;Body                  | N_Shelf |      |
| NR_024042              | Body                            |         |      |
| NR_030306;NM_001007527 | TSS1500;5'UTR                   | N_Shore |      |
| NR_024546;NM_004786    | Body;Body                       | Island  |      |
| NM_024678;NR_027479    | TSS1500;TSS1500                 | S_Shore |      |
| NR_023349;NM_052965;NM | TSS200;TSS200;TSS200            | N_Shore |      |
| NR_030170              | TSS200                          |         |      |
| NR_003948              | Body                            |         |      |
| NM_171829;NM_001163677 | TSS1500;Body;TSS1500;Body       | N_Shore |      |
| NM_017670;NR_003089    | Body;Body                       | S_Shore |      |
| NR_027433;NM_001003845 | Body;TSS1500                    | Island  |      |
| NR_030724;NM_020383;NM | Body;Body;Body                  | Island  |      |
| NM_000995;NM_033625;NR | 5'UTR;5'UTR;TSS1500             |         |      |
| NR_026956              | TSS200                          |         |      |
| NM_001142587;NM_001142 | TSS1500;TSS1500;TSS1500;TSS1500 | N_Shore |      |
| NR_003941;NR_003944;NM | TSS1500;TSS1500;TSS1500;TSS1500 | N_Shore |      |
| NR_015352              | TSS200                          | Island  |      |
| NR_026717;NM_005510    | TSS1500;Body                    | N_Shore |      |
| NR_024399;NR_024402    | Body;Body                       |         |      |
| NR_030331;NR_026677    | Body;Body                       |         |      |
| NR_027113;NR_027114    | Body;Body                       |         |      |
| NR_024370;NR_015396;NM | TSS1500;TSS1500;1stExon;5'UTR   | Island  |      |
| NM_206836;NM_006117;NR | Body;5'UTR;Body;5'UTR           | Island  |      |
| NM_032810;NR_028492    | TSS1500;Body                    | Island  |      |
| NR_024148;NR_029192;NR | (TSS1500;Body;TSS1500;TSS1500   |         |      |
| NM_001137675;NR_024612 | 5'UTR;Body                      | Island  |      |
| NR_003261              | TSS1500                         |         |      |
| NM_004071;NR_027855;NM | 5'UTR;Body;Body;Body            | N_Shore | RDMR |
| NM_001170803;NM_199188 | TSS1500;TSS1500;TSS1500;TSS1500 | N_Shore |      |
| NR_015357              | Body                            | Island  |      |
| NR_024383;NR_015436;NR | (Body;Body;Body                 | N_Shore |      |
| NR_021490;NR_021491    | Body;Body                       | Island  |      |
| NR_030717;NM_003083    | TSS1500;TSS1500                 | N_Shore |      |
| NR_003249;NM_031372    | Body;Body                       | N_Shore |      |
| NR_024172;NR_024173    | TSS1500;TSS1500                 |         |      |
| NR_026799;NM_003027;NM | Body;1stExon;5'UTR              | Island  | DMR  |



|                                                   |                                 |         |      |
|---------------------------------------------------|---------------------------------|---------|------|
| NR_031694                                         | TSS1500                         | N_Shore |      |
| NM_152872;NR_028034;NM_026825;NR_026989           | Body;Body;Body;Body;TSS1500     | S_Shore |      |
| NR_026825;NR_026989                               | Body;Body;Body                  | Island  |      |
| NR_026977;NR_027301                               | TSS1500;TSS200;TSS200           | Island  |      |
| NM_002264;NR_026698                               | TSS1500;TSS1500                 | S_Shore |      |
| NM_032772;NR_026977;NR_027038;NR_026744           | 1stExon;5'UTR;TSS200            | Island  |      |
| NR_026977;NR_027038;NR_026744                     | Body;5'UTR;5'UTR                | S_Shore |      |
| NM_003466;NR_027038;NR_026744                     | Body;Body;Body;Body;Body;5'UTR  | N_Shore |      |
| NR_027038;NR_026744                               | Body;5'UTR;Body;5'UTR           | Island  |      |
| NR_026878                                         | TSS200                          |         |      |
| NR_026878                                         | Body                            | Island  |      |
| NR_026971                                         | TSS1500                         | Island  |      |
| NM_002904;NR_003290                               | Body;TSS1500;TSS1500            | N_Shore |      |
| NM_006515;NR_024022                               | Body;Body                       | S_Shore |      |
| NR_003290                                         | Body                            | N_Shore |      |
| NM_138638;NR_028131;NR_026855;NR_002819           | TSS1500;TSS1500;TSS1500;TSS1500 | S_Shore |      |
| NR_026855;NR_002819                               | Body;Body                       | S_Shore |      |
| NR_002819                                         | Body                            | S_Shelf |      |
| NR_002563;NR_002564;NR_023389;NR_003716           | TSS1500;TSS200;TSS1500;TSS1500  | N_Shore |      |
| NR_023389;NR_003716                               | Body;TSS1500;Body               | Island  |      |
| NR_002139                                         | Body                            | S_Shore |      |
| NR_002139                                         | Body                            | Island  |      |
| NR_028339;NR_028340                               | TSS200;TSS200                   | S_Shore |      |
| NR_026753;NR_028134                               | Body;1stExon                    | Island  |      |
| NR_028134                                         | Body                            |         |      |
| NR_002801                                         | TSS200                          |         |      |
| NM_014596;NR_000024;NR_026681                     | TSS1500;TSS1500;Body            | N_Shore |      |
| NR_000024;NR_026681                               | TSS200;Body;TSS1500             | S_Shore |      |
| NR_026681                                         | TSS200                          |         |      |
| NR_024435;NR_024434;NR_033184;NR_002441;NR_002781 | Body;Body;TSS1500               | Island  |      |
| NR_033184;NR_002441;NR_002781                     | TSS1500;TSS1500                 | N_Shore |      |
| NR_002441;NR_002781                               | TSS200;Body;TSS1500;TSS1500     |         |      |
| NR_002781                                         | TSS1500                         | S_Shore |      |
| NR_029373;NR_029374                               | TSS1500;Body                    | N_Shore | RDMR |
| NR_003256;NR_027476;NR_027118;NR_182931;NR_031688 | Body;Body                       | Island  |      |
| NR_027476;NR_027118;NR_182931;NR_031688           | TSS200;TSS200;TSS1500;TSS200    | N_Shore |      |
| NM_138615;NR_027118;NR_182931;NR_031688           | Body;Body;TSS1500               | N_Shore |      |
| NR_027118;NR_182931;NR_031688                     | Body;Body;TSS1500               | N_Shore |      |
| NM_182931;NR_031688                               | 5'UTR;TSS1500;5'UTR             | S_Shore |      |
| NR_031688                                         | TSS1500                         |         |      |
| NM_000967;NR_001146310;NR_024445                  | Body;Body;Body                  | N_Shore |      |
| NR_001146310;NR_024445                            | Body;Body                       | N_Shore |      |

|                         |                                             |         |      |
|-------------------------|---------------------------------------------|---------|------|
| NR_024534;NM_032331;NM  | TSS1500;TSS200;TSS1500;TSS                  | Island  |      |
| NR_026823               | Body                                        |         |      |
| NR_002894               | TSS200                                      | Island  |      |
| NR_024014;NM_002081     | Body;Body                                   | N_Shelf |      |
| NM_002136;NR_002944;NM  | TSS1500;TSS1500;TSS1500;TSS                 | Island  |      |
| NR_026756               | TSS1500                                     |         |      |
| NR_015436               | Body                                        | Island  | DMR  |
| NR_026680;NR_027295     | Body;Body                                   | S_Shelf |      |
| NR_002447;NM_181491;NM  | TSS1500;TSS200;Body;TSS200                  | Island  |      |
| NR_003605;NR_003606;NR_ | Body;Body;TSS200;TSS1500;TSS                | S_Shore | RDMR |
| NR_027240               | TSS1500                                     |         |      |
| NM_001880;NM_001880;NR_ | 1stExon;5'UTR;TSS1500                       | Island  |      |
| NR_024254               | TSS1500                                     | Island  |      |
| NR_024255;NM_002051;NM  | TSS1500;TSS1500;TSS1500;TSS                 | Island  | DMR  |
| NR_002561;NR_000008;NR_ | TSS200;TSS1500;TSS1500;Body                 | N_Shore |      |
| NM_002103;NM_001161587  | TSS1500;TSS1500;TSS1500;TSS                 | S_Shore |      |
| NM_001167738;NR_031599; | Body;TSS200;Body                            |         |      |
| NR_027293               | TSS1500                                     |         |      |
| NR_003605;NR_003606;NR_ | Body;Body;TSS200;Body                       | S_Shelf | RDMR |
| NR_003365               | Body                                        | N_Shore |      |
| NM_001165030;NR_028491; | TSS1500;TSS1500;TSS1500                     | S_Shore |      |
| NR_002729               | Body                                        | Island  |      |
| NM_001005909;NM_016291  | Body;Body;3'UTR;Body;Body;3'UTR;3'UTR;3'UTR |         |      |
| NM_017996;NR_026645;NM  | TSS200;TSS200;TSS200                        |         |      |
| NR_026567               | Body                                        | Island  | DMR  |
| NR_030345               | TSS1500                                     |         |      |
| NR_003038;NR_003044;NR_ | Body;Body;TSS1500                           | N_Shore |      |
| NR_024355               | TSS200                                      |         |      |
| NR_021490;NR_021491     | Body;Body                                   | Island  |      |
| NM_020120;NR_027671     | Body;Body                                   | Island  |      |
| NR_027154;NR_027460     | TSS200;Body                                 | Island  |      |
| NR_002894               | Body                                        | Island  |      |
| NM_001025202;NR_027777; | TSS1500;Body;Body;Body                      | Island  |      |
| NM_006098;NR_002591     | TSS200;TSS1500                              | Island  |      |
| NR_024451;NM_030647     | Body;TSS1500                                | Island  |      |
| NR_027390;NM_001018090; | Body;Body;Body;Body;Body                    | Island  |      |
| NR_003684;NM_198216;NM  | TSS200;Body;Body                            |         |      |
| NM_018095;NR_024222;NM  | TSS1500;TSS1500;Body;TSS1500                | S_Shore |      |
| NM_001167869;NR_030765; | Body;Body;Body;Body;Body;Body               | N_Shelf |      |
| NR_031666;NM_001135212; | Body;Body;Body                              | N_Shore |      |
| NR_027412;NR_027413     | Body;Body                                   |         |      |
| NR_027428;NR_027430;NM  | TSS200;TSS200;Body;TSS200;                  | Island  | RDMR |
| NM_032141;NR_029945     | TSS200;TSS1500                              | Island  |      |
| NR_024469               | TSS1500                                     | N_Shore |      |

|                         |                                 |          |      |
|-------------------------|---------------------------------|----------|------|
| NR_028040;NM_012447;NM  | Body;3'UTR;3'UTR;Body;Body      |          |      |
| NR_028374;NM_002539     | Body;5'UTR                      | N_Shore  |      |
| NR_003671;NM_007175     | TSS200;Body                     |          |      |
| NR_030159;NM_001143979; | Body;1stExon;5'UTR;TSS200       |          |      |
| NM_176895;NM_003711;NR  | Body;Body;Body                  | N_Shore  |      |
| NR_027333;NM_020752     | Body;1stExon                    | Island   |      |
| NR_030724;NM_020383;NM  | Body;Body;Body                  |          |      |
| NR_028437;NR_028436;NM_ | TSS200;TSS200;TSS200            | N_Shore  |      |
| NR_024219;NR_024217;NR_ | (TSS1500;TSS1500;TSS1500        |          |      |
| NR_002612               | TSS1500                         | Island   | RDMR |
| NR_024584               | Body                            | Island   |      |
| NM_007074;NR_002454     | Body;TSS1500                    | S_Shelf  | CDMR |
| NM_001085365;NR_026922  | TSS1500;TSS200                  | Island   |      |
| NR_001434               | Body                            | Island   |      |
| NM_003029;NM_001130041  | 5'UTR;5'UTR;TSS1500;TSS150      | Island   |      |
| NR_030174               | TSS200                          |          |      |
| NR_027073;NM_020851;NM  | Body;TSS1500;TSS200;TSS150      | (Island  |      |
| NR_027404;NM_001036645; | TSS1500;TSS1500;TSS1500;TSS1500 | (Island  |      |
| NM_139235;NR_003667;NM  | TSS200;Body;TSS200              |          |      |
| NR_002824               | Body                            |          |      |
| NM_147195;NM_147195;NR  | 1stExon;5'UTR;TSS1500           | Island   | DMR  |
| NR_026815               | Body                            | Island   |      |
| NR_003948               | Body                            |          |      |
| NR_001435               | Body                            |          |      |
| NR_031602;NM_001006944; | TSS1500;Body;Body               | N_Shore  |      |
| NM_133474;NR_002451     | 5'UTR;Body                      | N_Shore  |      |
| NR_001283;NM_001008496  | TSS200;5'UTR                    | S_Shore  |      |
| NM_001173;NM_001030055  | 1stExon;5'UTR;1stExon;TSS1500   | Island   |      |
| NM_001018038;NM_001018  | TSS1500;TSS1500;Body;TSS1500    | (N_Shore |      |
| NM_032741;NM_006913;NR  | TSS1500;Body;Body               |          |      |
| NM_005632;NR_024121     | TSS1500;Body                    | Island   |      |
| NR_024467;NM_182765;NM  | Body;Body;Body                  | Island   |      |
| NM_001362;NR_031649     | TSS1500;TSS200                  | Island   |      |
| NR_028272               | TSS200                          | Island   |      |
| NR_026697;NM_001070;NM  | TSS200;5'UTR;TSS200;1stExon     | Island   |      |
| NR_031597;NM_002332     | TSS1500;Body                    |          |      |
| NM_001146310;NR_024445; | Body;Body;Body                  | Island   |      |
| NR_002972;NR_003239     | TSS1500;Body                    | Island   |      |
| NR_001434               | Body                            | Island   |      |
| NR_024080;NM_004300;NM  | TSS1500;TSS1500;Body;TSS1500    | (Island  |      |
| NR_028596;NM_001957;NM  | Body;1stExon;5'UTR;1stExon;     | Island   | DMR  |
| NR_027073;NM_020851;NM  | Body;TSS1500;TSS200;TSS1500     | (Island  |      |
| NR_026906;NR_026905;NR_ | (TSS1500;TSS1500;Body;Body      |          |      |
| NM_025125;NR_027430;NR_ | TSS1500;Body;Body;Body;Body     | (N_Shore |      |

|                         |                             |         |      |
|-------------------------|-----------------------------|---------|------|
| NR_031714               | TSS1500                     |         |      |
| NR_024254               | TSS1500                     | Island  |      |
| NM_178580;NM_030789;NM  | Body;Body;Body;TSS1500      | N_Shore |      |
| NR_024127;NR_003077;NR_ | Body;TSS1500;Body           | N_Shore |      |
| NR_024260;NM_015509     | Body;Body                   | S_Shore |      |
| NM_037370;NM_012142;NR  | TSS200;Body;Body;Body       | S_Shore |      |
| NM_014911;NR_003705     | Body;TSS1500                |         |      |
| NR_026669;NM_014841     | TSS200;TSS200               | Island  |      |
| NR_031681               | TSS1500                     |         |      |
| NR_003063;NM_006000     | Body;Body                   | Island  |      |
| NR_024079               | TSS1500                     | Island  |      |
| NR_024399;NM_178310     | Body;Body                   | Island  |      |
| NR_002799;NM_002106     | TSS1500;Body                | Island  |      |
| NR_031716;NM_021241     | TSS1500;5'UTR               |         | CDMR |
| NR_024041;NM_152618     | TSS200;TSS200               | Island  |      |
| NR_002185               | TSS1500                     |         |      |
| NR_002710               | Body                        | Island  |      |
| NR_027005               | TSS1500                     | S_Shore |      |
| NR_026961               | TSS200                      |         |      |
| NM_001141970;NR_024517; | TSS1500;TSS1500;TSS1500;TSS | S_Shore |      |
| NR_002801               | Body                        |         |      |
| NR_027400;NM_000543;NM  | TSS1500;TSS1500;TSS1500     | N_Shore |      |
| NR_015453;NM_001146069; | TSS1500;TSS200;TSS1500      | Island  |      |
| NM_014182;NR_026723;NR_ | TSS1500;Body;Body;Body      | Island  |      |
| NR_026580;NM_007111     | Body;Body                   | N_Shore |      |
| NR_024534;NM_032331;NM  | TSS1500;TSS200;TSS1500;TSS  | Island  |      |
| NR_024465;NM_006110     | TSS1500;TSS1500             | S_Shore |      |
| NM_152410;NM_001080378  | Body;Body;Body;Body         |         |      |
| NM_001143971;NM_001143  | 5'UTR;5'UTR;Body;Body       |         |      |
| NR_031766;NM_017899;NM  | Body;Body;Body              | S_Shore |      |
| NR_030155;NR_030594;NR_ | TSS1500;TSS1500;TSS1500;TSS | N_Shore |      |
| NR_003042;NR_002749;NM_ | TSS1500;TSS1500;Body        |         |      |
| NR_015370;NR_002922     | Body;TSS1500                | Island  |      |
| NR_003671;NM_007175     | Body;Body                   |         |      |
| NM_206953;NR_027426;NM  | TSS200;Body;TSS200;TSS1500  | S_Shore |      |
| NR_002767;NM_018064     | TSS1500;TSS1500             | S_Shore |      |
| NR_027421               | Body                        |         |      |
| NR_027387               | TSS200                      | Island  |      |
| NR_023313;NR_027271;NM_ | Body;TSS200;5'UTR;Body      | S_Shore |      |
| NR_027822               | Body                        | Island  |      |
| NM_033542;NR_003189     | TSS200;TSS200               | Island  |      |
| NR_002798               | Body                        | Island  |      |
| NR_027449;NM_001146214; | TSS1500;TSS1500;TSS1500;TSS | N_Shore |      |
| NR_003569               | Body                        | S_Shore |      |

|                                                             |                                                                         |                             |     |
|-------------------------------------------------------------|-------------------------------------------------------------------------|-----------------------------|-----|
| NM_001142301;NM_153704                                      | TSS200;TSS200;TSS200                                                    | N_Shore                     |     |
| NR_024396                                                   | TSS200                                                                  |                             |     |
| NR_015404;NM_003668;NM_001961;NR_002602                     | TSS1500;Body;Body<br>Body;TSS1500                                       | S_Shore<br>Island           |     |
| NM_152872;NR_028034;NM_026777                               | Body;Body;Body;Body;TSS1500<br>Body                                     | S_Shore<br>N_Shore          |     |
| NR_028044;NR_003512;NM_001013615;NR_024332                  | Body;Body;5'UTR;TSS1500;Body<br>TSS200;Body                             | N_Shore<br>Island           |     |
| NR_024024;NM_001607;NM_001686;NR_002737                     | TSS1500;TSS1500;TSS1500;TSS200;TSS1500                                  | Island<br>S_Shore           |     |
| NM_145039;NR_003228;NR_003138;NM_016417;NR_024270           | 5'UTR;TSS200;TSS200;1stExon;Body<br>Body;TSS200;TSS1500;Body<br>TSS1500 | Island<br>Island<br>Island  |     |
| NR_003290                                                   | Body                                                                    | S_Shelf                     |     |
| NR_024580;NM_017995;NM_177925;NM_177925;NR_026580;NM_007111 | Body;TSS200;TSS200<br>5'UTR;1stExon;Body<br>Body;Body                   | Island<br>Island<br>N_Shore |     |
| NR_031572;NM_001170402;NM_033028;NR_002780                  | TSS1500;TSS1500;TSS1500;TSS1500;Body                                    | S_Shore<br>N_Shore          |     |
| NM_020476;NM_020478;NM_003655                               | Body;Body;Body;Body;Body;Body;Body;Body;TSS1500;Body<br>TSS200          | Island                      |     |
| NM_000977;NM_033251;NR_001558                               | 5'UTR;1stExon;TSS1500;5'UTR;Body<br>Body                                | Island                      | DMR |
| NR_026590                                                   | TSS1500                                                                 |                             |     |
| NR_027138                                                   | TSS1500                                                                 | N_Shore                     |     |
| NR_002956;NM_014765                                         | TSS1500;TSS200                                                          | Island                      |     |
| NR_003013;NR_027058                                         | TSS1500;TSS200                                                          | Island                      |     |
| NM_001098533;NR_027703;NR_024383;NR_015436                  | TSS1500;TSS1500;TSS1500;TSS1500;Body;Body                               | N_Shore<br>Island           | DMR |
| NM_018442;NM_001143674                                      | TSS1500;5'UTR;TSS200;TSS200                                             | Island                      |     |
| NR_002315;NM_002107                                         | TSS1500;TSS1500                                                         | N_Shore                     |     |
| NR_003659                                                   | Body                                                                    | S_Shore                     |     |
| NR_015357                                                   | Body                                                                    | S_Shore                     |     |
| NM_006392;NR_031699;NR_002799;NM_002106                     | 1stExon;TSS200;Body;5'UTR<br>TSS1500;Body                               | Island<br>Island            |     |
| NR_022012;NM_153264                                         | Body;Body                                                               |                             |     |
| NR_003086                                                   | TSS200                                                                  | Island                      |     |
| NR_030342;NM_004111;NM_002822                               | TSS200;5'UTR;TSS200;1stExon;Body                                        | Island                      |     |
| NR_027148                                                   | Body                                                                    | N_Shore                     |     |
| NR_024158                                                   | Body                                                                    | N_Shore                     |     |
| NR_003276                                                   | Body                                                                    | N_Shore                     |     |
| NR_027816;NM_152744                                         | Body;Body                                                               | Island                      |     |

|                         |                                    |         |      |
|-------------------------|------------------------------------|---------|------|
| NR_023350;NM_004766     | TSS1500;TSS1500                    | S_Shore |      |
| NM_001141947;NR_024460; | TSS200;TSS200;TSS200               | Island  |      |
| NM_013406;NM_001099737  | 3'UTR;3'UTR;3'UTR;3'UTR;3'UTR;Body |         |      |
| NM_001166253;NR_029394; | Body;Body;Body;Body;Body;Body      |         |      |
| NR_029970;NR_029685     | TSS200;Body                        |         |      |
| NR_002187;NM_012470;NM_ | TSS200;1stExon;5'UTR               | Island  |      |
| NR_026972;NR_026973     | Body;Body                          | N_Shelf |      |
| NM_016417;NR_003138;NR_ | Body;TSS1500;TSS1500               | S_Shore |      |
| NM_001130136;NR_027073; | 5'UTR;TSS1500;TSS1500;TSS1         | Island  |      |
| NR_024467               | Body                               |         |      |
| NR_029582               | TSS1500                            | Island  |      |
| NR_027697;NR_027696     | Body;Body                          | N_Shelf |      |
| NM_175895;NR_029661     | TSS1500;TSS200                     | Island  |      |
| NR_027322               | TSS1500                            |         |      |
| NM_152835;NR_026686;NR_ | Body;Body;Body                     | S_Shore |      |
| NR_002785;NM_016592     | TSS200;3'UTR                       | N_Shore | CDMR |
| NR_026753;NR_026754;NM_ | Body;Body;3'UTR                    | S_Shelf |      |
| NR_028077;NM_001163391  | Body;5'UTR                         | Island  | DMR  |
| NR_003307;NR_003313;NR_ | (Body;Body;TSS1500                 |         |      |
| NR_026875               | Body                               | N_Shore |      |
| NR_023392;NR_026974     | Body;TSS1500                       | N_Shore |      |
| NR_026830               | Body                               | N_Shore | RDMR |
| NM_001145294;NR_026937; | TSS1500;Body;5'UTR;5'UTR           |         | RDMR |
| NR_026999               | TSS1500                            | N_Shore |      |
| NR_015405               | Body                               |         |      |
| NR_028272               | TSS1500                            | N_Shore | RDMR |
| NR_002196               | Body                               | N_Shore |      |
| NR_030621               | TSS200                             | Island  |      |
| NR_003228;NM_145039;NR_ | Body;TSS200;Body;Body              | Island  |      |
| NR_024356               | TSS200                             | Island  | DMR  |
| NM_144610;NR_024395     | Body;TSS1500                       |         |      |
| NM_001686;NR_003046;NR_ | Body;TSS1500;Body                  | N_Shore |      |
| NR_024374               | Body                               |         |      |
| NM_004111;NM_014206;NR_ | 5'UTR;TSS1500;TSS1500              | S_Shore |      |
| NM_001167966;NR_030778; | TSS1500;TSS1500;Body;Body          | Island  |      |
| NR_003714               | TSS1500                            | N_Shore |      |
| NM_021970;NM_021970;NR_ | 1stExon;5'UTR;Body                 |         |      |
| NR_015375               | Body                               | N_Shore |      |
| NR_027257               | TSS1500                            | N_Shore |      |
| NM_001166343;NR_029413; | TSS1500;TSS1500;TSS1500            |         |      |
| NR_000034               | TSS1500                            | S_Shore |      |
| NM_016093;NR_026683;NR_ | 5'UTR;TSS1500;TSS200               | Island  |      |
| NR_027337               | Body                               | S_Shore |      |
| NR_026789;NR_024044     | Body;Body                          |         |      |

|                         |                             |         |      |
|-------------------------|-----------------------------|---------|------|
| NM_004824;NR_026590;NM  | Body;Body;Body;Body         |         |      |
| NR_028044;NM_001042376; | Body;3'UTR;Body;5'UTR;Body  | S_Shelf |      |
| NR_003266               | Body                        | N_Shore |      |
| NR_002437;NM_001023;NM  | TSS200;Body;Body            | Island  | RDMR |
| NR_029607;NR_027148     | TSS1500;Body                |         |      |
| NR_026671;NR_026672;NM  | TSS1500;TSS1500;TSS1500     |         |      |
| NM_015363;NM_001146327  | TSS200;TSS200;TSS200;TSS200 | Island  |      |
| NM_017589;NM_001100388  | TSS1500;TSS1500;TSS1500;B   | N_Shore |      |
| NR_003037               | TSS200                      |         |      |
| NM_032810;NR_028492     | TSS1500;Body                | Island  |      |
| NR_001577               | Body                        |         |      |
| NR_029373;NR_029374     | TSS1500;Body                | Island  | RDMR |
| NR_033258;NM_014795;NM  | Body;5'UTR;1stExon;1stExon; | N_Shelf | DMR  |
| NR_015415;NM_177438     | Body;TSS1500                | Island  |      |
| NM_016122;NM_001042399  | 1stExon;5'UTR;TSS1500;5'UTR | Island  |      |
| NR_026578               | Body                        |         |      |
| NM_006195;NR_024123;NM  | 1stExon;Body;TSS1500;Body   | Island  |      |
| NR_026752               | Body                        |         |      |
| NM_006761;NR_024058     | Body;Body                   |         |      |
| NR_031598;NM_014275;NM  | TSS200;Body;Body            | S_Shore |      |
| NM_006041;NR_026880     | Body;TSS1500                | Island  | CDMR |
| NR_027349;NR_027350     | Body;Body                   | Island  |      |
| NR_003252;NM_014937     | Body;Body                   | S_Shore | RDMR |
| NR_027633;NM_001009877; | Body;Body;Body              | N_Shore |      |
| NM_003927;NR_002970;NM  | Body;TSS1500;Body           | N_Shore |      |
| NR_003920               | Body                        |         |      |
| NR_002821               | Body                        | Island  |      |
| NM_018362;NR_002832     | TSS1500;Body                | S_Shore |      |
| NM_153365;NR_027697;NR  | TSS1500;Body;Body           | Island  |      |
| NR_002327;NM_002952     | TSS200;Body                 | N_Shore |      |
| NR_003605;NR_003606;NR  | (Body;Body;Body             | S_Shelf | RDMR |
| NR_003266               | TSS1500                     | Island  |      |
| NR_027423               | Body                        |         |      |
| NM_001865;NR_029466     | TSS200;TSS200               |         |      |
| NM_172003;NR_029399     | Body;TSS1500                |         |      |
| NR_003698               | TSS200                      | Island  |      |
| NR_024281;NR_029668     | TSS1500;TSS200              | Island  |      |
| NM_199191;NM_199193;NM  | TSS1500;TSS1500;TSS1500;TSS | Island  |      |
| NR_016021;NM_032811     | TSS1500;TSS1500             | N_Shore |      |
| NM_153264;NR_022012     | 5'UTR;Body                  | S_Shore |      |
| NR_003307;NR_003313;NR  | (Body;Body;Body;TSS200      |         |      |
| NR_015436               | Body                        | S_Shelf |      |
| NM_001130001;NM_001130  | 5'UTR;5'UTR;1stExon;1stExon | S_Shore |      |
| NR_027399;NR_027398;NM  | TSS1500;TSS1500;TSS1500     | S_Shore |      |

|                               |                                                |         |      |
|-------------------------------|------------------------------------------------|---------|------|
| NM_019057;NR_024019           | Body;Body                                      | N_Shore |      |
| NR_004846                     | TSS1500                                        | N_Shore |      |
| NM_001130042;NM_001889        | TSS1500;TSS1500;Body;TSS1500;Body;TSS1500;Body |         |      |
| NR_029192;NR_024148;NR_024148 | TSS200;TSS1500;TSS1500;TSS1500                 |         |      |
| NM_001039693;NR_004862        | TSS1500;TSS1500;Body                           | Island  |      |
| NR_002944;NM_031157;NM_031157 | TSS200;TSS200;TSS200;TSS1500                   | Island  |      |
| NM_001024660;NM_001024        | 1stExon;5'UTR;Body;5'UTR;1stExon               |         |      |
| NM_001161563;NM_001161        | Body;Body;Body;Body;Body;Body                  | N_Shore |      |
| NM_001139518;NM_001042        | TSS1500;TSS200;TSS200;TSS1500                  | Island  |      |
| NM_001100592;NR_027040        | 5'UTR;Body;5'UTR;1stExon;1stExon               | N_Shore |      |
| NM_020120;NR_027671           | TSS1500;TSS1500                                | N_Shore |      |
| NM_001159554;NM_005446        | 1stExon;1stExon;TSS1500                        | S_Shore |      |
| NR_026789                     | Body                                           |         |      |
| NM_000990;NR_002580           | Body;TSS1500                                   | Island  |      |
| NR_015428                     | Body                                           | Island  |      |
| NR_002733                     | Body                                           | Island  |      |
| NM_001048223;NM_001048        | TSS1500;TSS1500;Body;TSS1500                   | N_Shore |      |
| NR_024412;NR_015442           | TSS1500;TSS1500                                |         | DMR  |
| NM_152786;NR_027261;NM_152786 | 5'UTR;TSS1500;1stExon;TSS1500                  | S_Shore |      |
| NR_027435;NM_020801           | TSS1500;Body                                   | N_Shore |      |
| NR_015404;NM_003668;NM_003668 | Body;TSS200;TSS200                             | Island  |      |
| NM_001079522;NR_027123        | TSS1500;Body;TSS1500;TSS1500                   | N_Shore | RDMR |
| NR_026872;NM_002602           | Body;Body                                      | S_Shelf |      |
| NM_003143;NR_015392           | 5'UTR;TSS1500                                  | Island  |      |
| NR_003042;NM_004582           | TSS1500;Body                                   |         |      |
| NR_004053                     | Body                                           | N_Shore |      |
| NM_199193;NM_022128;NM_022128 | 5'UTR;TSS1500;5'UTR;5'UTR;5'UTR                | S_Shore |      |
| NM_001037663;NM_001959        | Body;Body;TSS1500;TSS1500                      | S_Shore |      |
| NR_028408                     | TSS200                                         | Island  |      |
| NM_005378;NR_026766           | 5'UTR;TSS1500                                  | Island  |      |
| NR_024383;NR_015436           | Body;Body                                      | Island  |      |
| NM_015913;NM_015913;NM_015913 | 1stExon;5'UTR;TSS1500;TSS1500                  | Island  |      |
| NR_024453                     | Body                                           | S_Shore | RDMR |
| NR_027908                     | Body                                           | N_Shore |      |
| NR_002586;NR_031650;NM_031650 | TSS1500;TSS1500;Body;TSS1500                   | S_Shore | RDMR |
| NR_028337                     | TSS1500                                        | N_Shelf |      |
| NR_027822                     | Body                                           |         |      |
| NR_026857;NM_017450;NM_017450 | TSS1500;Body;Body;Body;Body                    | Island  | DMR  |
| NM_018844;NR_027830           | TSS1500;TSS1500                                | N_Shore |      |
| NR_031666                     | Body                                           | S_Shore |      |
| NM_032391;NR_024103           | TSS200;TSS1500                                 | N_Shore |      |
| NR_003700                     | Body                                           | N_Shelf |      |
| NR_003086                     | Body                                           | S_Shore |      |
| NR_027463;NM_133491;NR_133491 | Body;5'UTR;TSS1500;1stExon                     | Island  |      |



|                         |                              |         |      |
|-------------------------|------------------------------|---------|------|
| NR_024514;NM_139027;NM  | Body;Body;Body;TSS1500;TSS   | N_Shore |      |
| NR_029372;NM_001002010  | TSS200;TSS200                | Island  |      |
| NM_020988;NM_138736;NR  | TSS1500;TSS1500;Body         | N_Shore | DMR  |
| NR_026728;NM_018217;NM  | TSS200;TSS200;TSS200         | Island  |      |
| NR_004401;NM_001352     | TSS1500;1stExon              | Island  |      |
| NM_001100592;NR_027040; | 5'UTR;Body;5'UTR;1stExon;1s  | Island  |      |
| NR_024603;NM_004870     | Body;1stExon                 | Island  |      |
| NR_030320               | TSS200                       | S_Shelf |      |
| NM_001865;NR_029466     | TSS200;TSS200                |         |      |
| NM_199193;NM_022128;NM  | 5'UTR;TSS1500;5'UTR;5'UTR;5' | S_Shore |      |
| NR_028044;NR_003512;NM  | Body;Body;5'UTR;TSS1500;Bc   | N_Shore |      |
| NR_024253               | Body                         |         |      |
| NR_015358               | Body                         |         |      |
| NR_028437;NR_028436;NM  | TSS200;TSS200;TSS200         | N_Shore |      |
| NR_028473;NM_016464     | Body;Body                    | S_Shelf |      |
| NR_030345               | TSS200                       |         |      |
| NM_001015;NR_001285     | TSS200;TSS1500               | Island  |      |
| NR_015415;NM_177438     | Body;TSS1500                 | S_Shore |      |
| NR_026745;NM_001145079; | TSS200;TSS200;TSS200         | N_Shore |      |
| NR_002307               | TSS200                       | N_Shore |      |
| NM_020386;NR_026877     | TSS1500;TSS1500              | N_Shore |      |
| NM_021253;NR_024052;NR  | TSS1500;Body;Body            | N_Shore |      |
| NM_001171155;NR_033242; | TSS1500;TSS1500;Body         | N_Shore |      |
| NM_144704;NR_027464;NM  | 3'UTR;Body;3'UTR;3'UTR;TSS   | N_Shore |      |
| NM_001003809;NR_024101; | Body;Body;Body               |         |      |
| NR_015370;NR_002922     | Body;TSS1500                 | Island  |      |
| NR_026677               | TSS1500                      |         |      |
| NM_006392;NR_027700;NR  | Body;Body;TSS1500            | Island  |      |
| NR_024600;NM_138929;NM  | Body;5'UTR;5'UTR;Body        | Island  |      |
| NR_027660;NM_001160183; | TSS1500;TSS1500;TSS1500;TSS  | N_Shore |      |
| NR_024484               | Body                         | Island  |      |
| NR_027816;NM_152744     | Body;Body                    |         |      |
| NR_003360               | TSS1500                      |         |      |
| NM_139235;NR_003667;NM  | Body;Body;Body               |         |      |
| NM_006117;NM_206836;NR  | TSS1500;TSS1500;TSS1500;TSS  | Island  |      |
| NM_016145;NM_032332;NM  | 1stExon;TSS200;5'UTR;Body;5' | Island  |      |
| NM_001083614;NR_003501; | 1stExon;Body;TSS200;5'UTR    | Island  |      |
| NR_031766;NM_017899;NM  | Body;Body;Body               | N_Shore |      |
| NR_000034               | TSS1500                      | Island  |      |
| NM_022492;NR_027749;NM  | Body;Body;TSS200             | S_Shore |      |
| NM_002222;NM_001099952  | Body;Body;Body;TSS1500       |         |      |
| NR_024519;NR_024518;NR  | Body;Body;Body;Body;Body;5'  | N_Shore | RDMR |
| NR_029373;NR_029374     | Body;Body                    | Island  | DMR  |
| NM_017884;NR_031711     | Body;TSS200                  |         |      |

|                                                                                                           |                                                                               |         |      |
|-----------------------------------------------------------------------------------------------------------|-------------------------------------------------------------------------------|---------|------|
| NM_018177;NR_027277                                                                                       | TSS1500;Body                                                                  | Island  |      |
| NM_006392;NR_003078;NR_019009;NR_029409                                                                   | Body;TSS200;Body;TSS1500                                                      | S_Shore |      |
| NM_006041;NR_026880                                                                                       | Body;TSS1500                                                                  | N_Shore |      |
| NR_027855;NM_001162407;NR_021253;NR_024052;NR_023318;NR_023319;NM_032741;NM_006913;NR_001024660;NM_001024 | Body;Body;Body;Body                                                           | N_Shelf | CDMR |
| NR_003501;NM_001083614                                                                                    | TSS200                                                                        | Island  | RDMR |
| NM_001145363;NR_026910                                                                                    | TSS1500;Body;Body;TSS1500                                                     | N_Shore |      |
| NR_003263                                                                                                 | TSS200;TSS200;TSS200                                                          | Island  |      |
| NR_029389                                                                                                 | TSS1500;Body;Body                                                             |         |      |
| NR_002949;NR_027766                                                                                       | 1stExon;5'UTR;Body;5'UTR;1stExon                                              |         |      |
| NR_021490;NR_021491;NR_030617                                                                             | Body;Body                                                                     |         |      |
| NR_031662;NM_032359                                                                                       | 1stExon;Body;5'UTR;1stExon;Island                                             |         |      |
| NR_028044;NR_003512;NM_027117                                                                             | TSS200                                                                        | Island  |      |
| NR_026951                                                                                                 | TSS1500                                                                       | S_Shelf |      |
| NR_002612                                                                                                 | TSS200;TSS1500                                                                | N_Shore |      |
| NM_000968;NR_002440;NR_026876                                                                             | Body;Body;Body                                                                | Island  |      |
| NR_003111                                                                                                 | Body                                                                          |         |      |
| NR_015453;NM_001146069;NR_002561;NR_000008;NR_001165030;NR_028491;                                        | Body;TSS200                                                                   | Island  |      |
| NM_001145049;NM_001142                                                                                    | Body;Body;5'UTR;Body;TSS200                                                   | Island  |      |
| NR_002184                                                                                                 | TSS200                                                                        | Island  |      |
| NR_027764                                                                                                 | TSS200                                                                        | S_Shore |      |
| NM_033412;NR_024872;NR_028040;NM_178831;NR_001141970;NR_024517;                                           | 5'UTR;TSS1500;Body;TSS1500;Body;5'UTR;TSS1500;Body                            | S_Shore |      |
| NR_028044;NR_003512;NM_002188                                                                             | TSS1500                                                                       | N_Shore |      |
| NR_002184                                                                                                 | TSS1500                                                                       | S_Shore |      |
| NM_015913;NM_001136497                                                                                    | TSS1500;TSS1500;TSS1500;TSS1500                                               | N_Shore |      |
| NR_026878                                                                                                 | Body                                                                          | Island  | DMR  |
| NR_003142;NR_002326;NR_002582;NM_001007074;                                                               | TSS1500;TSS1500;TSS1500;TSS1500;TSS1500;TSS1500;TSS1500;TSS1500;TSS200;TSS200 | N_Shore |      |
| NM_020914;NR_029376                                                                                       | Body;Body                                                                     | S_Shore |      |
| NR_026765                                                                                                 | Body                                                                          |         |      |
| NR_002961;NR_003110                                                                                       | TSS1500;Body                                                                  | S_Shore |      |
| NR_026981;NM_001003789;                                                                                   | Body;5'UTR;5'UTR;5'UTR;5'UTR                                                  | N_Shore |      |
| NR_026951                                                                                                 | TSS200                                                                        | S_Shore |      |

|                                                                 |                                                                  |                             |         |
|-----------------------------------------------------------------|------------------------------------------------------------------|-----------------------------|---------|
| NM_001162505;NM_199203                                          | Body;Body;Body;Body                                              | Island                      |         |
| NR_026883;NR_026885;NR_003239                                   | (Body;TSS200;TSS200<br>TSS200                                    |                             | N_Shore |
| NM_014415;NR_024407                                             | TSS200;Body                                                      | Island                      |         |
| NM_001141945;NM_152872                                          | TSS200;Body;Body;Body;Body                                       | S_Shore                     |         |
| NM_001300;NR_027653;NR_003075                                   | 5'UTR;Body;1stExon;1stExon;<br>TSS1500                           | Island<br>S_Shore           | CDMR    |
| NR_027087                                                       | TSS1500                                                          |                             |         |
| NR_001578                                                       | Body                                                             | S_Shore                     | DMR     |
| NR_028324                                                       | Body                                                             |                             |         |
| NR_002824                                                       | Body                                                             |                             |         |
| NM_001016;NR_002435;NR_014415;NR_024407                         | Body;TSS200;TSS1500<br>TSS1500;Body                              | S_Shore<br>S_Shore          |         |
| NR_028334                                                       | TSS200                                                           | S_Shore                     |         |
| NM_030819;NR_027399;NR_024610;NM_005340;NR_001141969;NR_024517; | 5'UTR;Body;Body<br>TSS200;TSS200;TSS200<br>Body;Body;Body;Body   | Island<br>Island<br>N_Shore |         |
| NR_024034                                                       | Body                                                             | Island                      |         |
| NR_024194;NR_024195;NR_030621                                   | Body;Body;Body;Body;Body;Body;<br>Body                           | S_Shore<br>Island           |         |
| NR_024581;NM_024701                                             | TSS200;TSS200                                                    | Island                      |         |
| NR_024568                                                       | Body                                                             | N_Shelf                     |         |
| NR_027295;NR_026680                                             | TSS1500;TSS1500                                                  | N_Shore                     |         |
| NR_027103                                                       | TSS200                                                           |                             |         |
| NM_173627;NM_001164637                                          | TSS1500;TSS1500;TSS1500;Body                                     | Island                      |         |
| NR_002824                                                       | Body                                                             |                             |         |
| NR_030169                                                       | TSS1500                                                          | S_Shelf                     |         |
| NR_026950                                                       | TSS1500                                                          | S_Shore                     |         |
| NM_018177;NR_027277                                             | 5'UTR;TSS1500                                                    | S_Shore                     |         |
| NM_052839;NR_027691;NM_030937;NM_001144868                      | Body;Body;Body<br>Body;Body;Body;TSS1500;Body                    | S_Shore<br>N_Shore          |         |
| NM_030573;NM_001008695                                          | Body;Body;TSS1500;TSS1500                                        | N_Shore                     |         |
| NR_027451                                                       | TSS200                                                           | S_Shore                     |         |
| NM_005510;NM_004197;NR_015444                                   | 5'UTR;TSS200;Body;TSS200<br>Body                                 | N_Shore                     |         |
| NR_027399;NR_027398;NR_033203;NR_033204;NR_026730               | TSS200;TSS200;TSS200<br>(Body;Body;Body;TSS1500;TSS1500;<br>Body | Island<br>N_Shore<br>Island |         |
| NM_007349;NR_028090                                             | TSS1500;Body                                                     | Island                      |         |
| NR_002766;NR_003531;NR_026865;NM_030936                         | (TSS1500;TSS1500;TSS1500<br>TSS1500;5'UTR                        | N_Shore<br>S_Shore          |         |
| NR_026826;NM_001145159;                                         | TSS1500;TSS1500;5'UTR;TSS1500                                    | S_Shore                     |         |
| NR_024014;NM_002081                                             | TSS1500;Body                                                     | S_Shore                     |         |
| NR_024100                                                       | TSS1500                                                          |                             |         |

|                                                         |                              |        |         |
|---------------------------------------------------------|------------------------------|--------|---------|
| NR_027475;NR_027474;NM_TSS1500;TSS1500;TSS1500;TSS1500  |                              |        |         |
| NR_029498;NM_005916;NM_TSS1500;Body;Body;TSS200;TSS1500 |                              |        |         |
| NM_030660;NM_001164781                                  | 5'UTR;5'UTR;Body;1stExon;5'  | Island |         |
| NM_002931;NR_029633                                     | TSS1500;TSS1500              |        | N_Shore |
| NR_024019;NM_019057                                     | TSS1500;TSS1500              |        | S_Shore |
| NR_024374                                               | Body                         |        |         |
| NR_024448;NM_153615                                     | Body;TSS1500                 |        |         |
| NR_026580;NM_007111                                     | Body;Body                    |        | S_Shelf |
| NR_015441                                               | TSS200                       |        | Island  |
| NR_026052                                               | TSS200                       |        | Island  |
| NR_029607;NR_027148                                     | TSS1500;Body                 |        |         |
| NR_028074;NM_014828;NM_TSS200;TSS200;TSS1500;TSS200     |                              | Island |         |
| NR_026895;NM_006544;NM_Body;TSS1500;1stExon             |                              |        | S_Shore |
| NM_207354;NR_030767                                     | Body;Body                    |        | S_Shore |
| NR_027051;NM_030573;NR_Body;TSS1500;Body;TSS1500        |                              | Island |         |
| NR_026867                                               | TSS200                       |        | S_Shore |
| NM_001142273;NM_015282                                  | Body;Body;Body;TSS200        |        | Island  |
| NR_027786                                               | TSS200                       |        | N_Shore |
| NR_003086                                               | TSS1500                      |        | N_Shore |
| NR_026541;NR_026564;NR_Body;Body;Body                   |                              |        | S_Shore |
| NR_027107                                               | TSS1500                      |        | Island  |
| NR_026676                                               | Body                         |        | Island  |
| NM_178126;NR_026697;NM_1stExon;Body;TSS200              |                              | Island |         |
| NR_026785;NM_052924                                     | Body;TSS1500                 |        | Island  |
| NM_206826;NM_014366;NM_Body;Body;Body;TSS1500           |                              |        | S_Shelf |
| NR_028335;NM_024086                                     | TSS1500;3'UTR                |        |         |
| NM_001141969;NR_024517;Body;Body;Body;Body              |                              |        | N_Shore |
| NR_030218                                               | TSS1500                      |        |         |
| NR_026580;NM_007111                                     | Body;Body                    |        | Island  |
| NR_024024;NM_001130410;TSS200;TSS200;TSS1500;TSS200     |                              | Island |         |
| NR_027332;NM_000860;NM_TSS200;TSS1500;TSS1500           |                              |        | S_Shore |
| NM_032811;NM_032811;NR_1stExon;5'UTR;Body               |                              | Island |         |
| NR_024469                                               | TSS1500                      |        | Island  |
| NR_002591;NM_006098;NM_TSS1500;1stExon;5'UTR            |                              | Island |         |
| NM_021259;NR_024453                                     | Body;TSS1500                 |        | Island  |
| NM_006554;NR_027850                                     | TSS200;TSS200                |        | N_Shore |
| NR_027428;NR_027430;NM_TSS200;TSS200;Body;TSS200;TSS200 |                              | Island |         |
| NM_004945;NM_001005362                                  | TSS200;TSS200;TSS200;TSS200  | Island |         |
| NM_173627;NM_001164637                                  | TSS1500;TSS1500;TSS1500;Body | Island |         |
| NR_024485;NR_024486                                     | Body;Body                    |        | N_Shore |
| NR_027626;NR_002174                                     | TSS200;TSS1500               |        | N_Shore |
| NM_147195;NR_027294                                     | Body;TSS1500                 |        | Island  |
| NR_002329;NR_002330;NM_TSS200;Body;Body;Body            |                              |        | N_Shore |
| NR_003313;NR_003312;NR_TSS1500;TSS1500;TSS1500          |                              |        |         |

DMR

RDMR

|                         |                               |         |      |
|-------------------------|-------------------------------|---------|------|
| NM_000520;NR_027262     | 1stExon;TSS200                | Island  |      |
| NM_006087;NR_030585     | Body;TSS200                   | Island  |      |
| NM_001011537;NM_001145  | 1stExon;1stExon;5'UTR;5'UTR   | Island  |      |
| NR_024534;NM_005787;NM  | TSS1500;TSS1500;Body;TSS1500  | N_Shore |      |
| NM_080604;NM_001146020  | Body;Body;Body;Body;Body;Body | N_Shelf |      |
| NR_028044;NR_003512;NM  | Body;Body;5'UTR;5'UTR;Body    | Island  | DMR  |
| NR_028058               | Body                          |         |      |
| NR_026786;NM_032263;NR  | Body;TSS1500;Body;Body;Body   | S_Shore | RDMR |
| NR_003512;NM_001007139; | Body;3'UTR;3'UTR;3'UTR        | N_Shore |      |
| NM_005313;NR_002318     | TSS200;Body                   | N_Shore |      |
| NR_003367               | TSS1500                       | Island  |      |
| NM_001880;NR_030630     | TSS1500;TSS1500               | S_Shore |      |
| NR_026781;NR_026780     | Body;Body                     | S_Shore |      |
| NR_030179;NR_029613     | TSS200;Body                   | S_Shore |      |
| NR_024042               | TSS1500                       |         |      |
| NR_003500               | Body                          | N_Shore |      |
| NR_015449;NR_023384;NR  | (Body;Body;Body               | Island  |      |
| NR_030588;NM_017415     | TSS200;Body                   |         |      |
| NR_028436;NM_003347;NR  | TSS1500;TSS1500;TSS1500       | N_Shore |      |
| NR_002995;NR_004380     | TSS1500;TSS200                | Island  |      |
| NM_018227;NR_015439     | TSS1500;Body                  | S_Shore |      |
| NM_001130041;NM_003029  | TSS1500;TSS1500;Body;Body     | Island  |      |
| NR_002929               | TSS1500                       | Island  |      |
| NM_014415;NR_024407     | 1stExon;Body                  | Island  |      |
| NM_001170687;NM_001170  | Body;Body;Body;5'UTR;Body;    | Island  |      |
| NR_003129;NM_006913;NM  | TSS1500;TSS1500;1stExon;5'UTR |         |      |
| NR_003491               | Body                          | S_Shore | DMR  |
| NR_002971;NM_080686     | TSS1500;5'UTR                 | S_Shore |      |
| NR_026712;NM_012423     | Body;Body                     | Island  |      |
| NM_052924;NR_026785     | TSS200;TSS200                 | Island  |      |
| NR_027337               | Body                          | Island  |      |
| NR_023938               | TSS1500                       | N_Shore | DMR  |
| NR_027242               | Body                          | N_Shore |      |
| NM_032846;NR_028074;NM  | Body;Body;TSS1500;TSS200      | N_Shore |      |
| NR_024547;NM_003876     | TSS1500;TSS1500               | S_Shore |      |
| NM_182620;NM_001100595  | Body;Body;TSS1500             | N_Shelf |      |
| NR_030205;NR_030206     | Body;TSS1500                  |         |      |
| NR_027463;NR_027462;NM  | Body;Body;TSS200              | S_Shore |      |
| NM_021238;NR_026806;NM  | 5'UTR;TSS200;5'UTR;5'UTR      | Island  |      |
| NR_015428               | Body                          | Island  |      |
| NR_027078;NM_138736;NM  | TSS1500;1stExon;5'UTR;1stEx   | Island  | DMR  |
| NR_023382               | TSS1500                       | N_Shore |      |
| NR_003512;NR_028044;NM  | Body;TSS1500;Body;5'UTR;TS    | Island  |      |
| NR_028032               | Body                          | Island  |      |

|                                                                                                                        |                                   |         |     |
|------------------------------------------------------------------------------------------------------------------------|-----------------------------------|---------|-----|
| NR_027382;NM_138412;NM_003671;NM_007175                                                                                | TSS200;5'UTR;TSS200;TSS200        | Island  |     |
| NR_024153;NR_015431                                                                                                    | TSS1500;Body                      | Island  |     |
| NR_024527;NM_001142348;NR_029380                                                                                       | TSS200;Body;Body;TSS200           | Island  | DMR |
| NR_026926;NR_026923;NR_015411                                                                                          | Body;TSS1500;Body                 | N_Shore |     |
| NR_003610                                                                                                              | Body                              | Island  |     |
| NR_030174                                                                                                              | TSS200                            |         |     |
| NR_028133;NM_001145299;NM_198718;NR_028294;NM_001024380;NR_027638;NR_012459;NM_003002;NR_001141969;NR_024517;NR_026971 | TSS1500;TSS200;TSS200;TSS200      | Island  |     |
| NR_027387                                                                                                              | 1stExon;Body;1stExon;Body;1stExon | Island  |     |
| NM_001024380;NR_027638;NR_012459;NM_003002;NR_001141969;NR_024517                                                      | 5'UTR;TSS1500;1stExon;TSS1500     | Island  |     |
| NR_026971                                                                                                              | Body;TSS1500;Body                 | N_Shore |     |
| NR_027387                                                                                                              | 5'UTR;Body;Body;5'UTR             | Island  |     |
| NM_032885;NR_031603                                                                                                    | TSS200                            | Island  |     |
| NR_024430;NR_029671                                                                                                    | Body                              | Island  |     |
| NR_027237                                                                                                              | Body                              | N_Shore |     |
| NM_001136473;NM_001136                                                                                                 | 5'UTR;5'UTR;Body;5'UTR            |         |     |
| NM_030573;NM_001008695                                                                                                 | Body;Body;TSS1500;TSS1500         | N_Shore |     |
| NM_003927;NR_002970;NM_001136123;NR_024245                                                                             | Body;TSS1500;Body                 | N_Shore |     |
| NR_027284;NR_026861;NR_003266                                                                                          | Body;Body;Body                    | S_Shore |     |
| NR_021492;NR_027928;NM_027301                                                                                          | Body;TSS200;TSS200                | Island  | DMR |
| NR_028484;NR_028483;NM_024621;NM_139022;NM_004860;NR_027463                                                            | TSS200                            | Island  |     |
| NR_024625;NM_001142931;NR_018177;NR_027277                                                                             | Body;TSS200;TSS200                | Island  |     |
| NR_026667                                                                                                              | Body                              | N_Shore |     |
| NM_006000;NR_003063                                                                                                    | Body;Body;TSS1500                 | Island  | DMR |
| NR_024383;NR_015436;NR_002187;NM_012470                                                                                | Body;TSS1500;Body                 | Island  |     |
| NR_002307                                                                                                              | Body;TSS1500;Body                 | N_Shore |     |
| NR_024367                                                                                                              | TSS1500                           | S_Shore |     |
| NR_015340                                                                                                              | TSS1500                           |         |     |
| NM_001130136;NR_027073;NR_003954;NM_024694                                                                             | 5'UTR;TSS1500;TSS1500;TSS1500     | Island  |     |
| NR_015454;NM_002359                                                                                                    | TSS200;Body                       |         |     |
| NR_024529;NR_000029;NR_015327;NR_026678;NM_015327;NR_026678;NM_015327                                                  | TSS1500;TSS1500;TSS1500;5'UTR     | Island  |     |
|                                                                                                                        | TSS1500;Body;TSS1500              |         |     |

|                                                   |                                                      |         |      |
|---------------------------------------------------|------------------------------------------------------|---------|------|
| NM_152522;NR_024526                               | Body;Body                                            | S_Shore |      |
| NR_002578;NR_003942;NR_003942                     | Body;TSS1500;TSS1500;TSS1500                         | N_Shore |      |
| NM_019605;NR_024337                               | 5'UTR;Body                                           | Island  |      |
| NR_024568;NM_022818                               | Body;TSS1500                                         | N_Shore |      |
| NR_023348;NM_001481                               | TSS200;TSS200                                        | Island  |      |
| NM_013309;NR_022014                               | TSS1500;Body                                         | S_Shore |      |
| NR_029375;NM_001099737                            | TSS1500;TSS1500;Body                                 | N_Shore | RDMR |
| NM_021080;NR_030385                               | 5'UTR;TSS1500                                        |         |      |
| NR_027242                                         | Body                                                 | Island  |      |
| NR_028102;NM_025264                               | Body;Body                                            | N_Shore |      |
| NR_030372;NM_000164                               | TSS200;Body                                          | N_Shelf |      |
| NR_031680;NM_015554                               | Body;5'UTR                                           | Island  |      |
| NR_024042                                         | TSS200                                               |         |      |
| NR_000015;NR_000024;NM_001033568;NR_002222        | TSS1500;TSS1500;TSS1500;Body;TSS1500;Body;Body       | N_Shore |      |
| NR_001281                                         | Body                                                 | N_Shore | RDMR |
| NR_026646                                         | TSS200                                               |         |      |
| NM_014620;NM_018953;NR_003149;NM_032119           | 5'UTR;TSS200;Body;Body;Body                          | N_Shore |      |
| NM_003466;NM_013951;NM_005446;NM_001159554        | Body;Body;Body;Body;Body;Body;TSS1500;TSS1500;TSS200 | Island  |      |
| NR_024457                                         | TSS200                                               | Island  | DMR  |
| NR_026870                                         | TSS1500                                              |         |      |
| NM_018043;NR_030691                               | Body;Body                                            | Island  |      |
| NR_003667;NM_014471                               | Body;Body                                            |         |      |
| NM_006041;NR_026880                               | Body;TSS1500                                         | Island  | CDMR |
| NR_029712                                         | Body                                                 | S_Shelf |      |
| NR_024370;NR_015396;NM_027399;NR_027398;NM_024076 | Body;TSS200;TSS1500;TSS1500;TSS1500;TSS1500;Body     | S_Shore |      |
| NR_003944;NM_032522;NR_001099737;NR_029375        | TSS1500;TSS1500;TSS200;TSS200;TSS200;1stExon         | N_Shore |      |
| NM_001163484;NM_025230                            | 5'UTR;5'UTR;Body;Body;5'UTR                          | S_Shore |      |
| NM_000528;NM_001099737                            | TSS1500;5'UTR;Body                                   | N_Shore |      |
| NR_003944;NM_032522;NR_001099737;NR_029375        | TSS1500;TSS1500;TSS200;TSS200;TSS200;1stExon         | N_Shore |      |
| NM_001099737;NR_029375                            | TSS200;TSS200;1stExon                                | Island  |      |
| NM_198256;NR_003093;NR_030170                     | TSS200;TSS200;TSS200;TSS200                          | S_Shore |      |
| NR_023382                                         | Body                                                 | Island  |      |
| NM_017444;NR_023360                               | Body;Body                                            | Island  |      |
| NR_023319;NR_023318;NM_028504;NR_028502;NM_026750 | Body;Body;Body;TSS1500;TSS1500;Body;TSS1500          | N_Shore |      |
| NR_028504;NR_028502;NM_026750                     | TSS1500;TSS1500;Body;TSS1500                         | S_Shore |      |
| NR_026750                                         | Body                                                 | N_Shore |      |

|                                |                                |         |      |
|--------------------------------|--------------------------------|---------|------|
| NM_001100592;NR_027040;        | 5'UTR;TSS200;5'UTR;1stExon;    | Island  |      |
| NR_028398;NR_028394;NR_028394; | Body;Body;Body;Body;Body;      | Island  | RDMR |
| NR_002754;NR_002755;NM_002754; | Body;Body;TSS1500;TSS1500;     | N_Shore | RDMR |
| NR_003082                      | TSS1500                        |         |      |
| NR_001435                      | Body                           |         |      |
| NR_028080;NM_032042;NM_028080; | Body;Body;Body;Body;TSS1500;   | Island  |      |
| NR_024553                      | Body                           | Island  | DMR  |
| NR_029374;NM_001166119;        | TSS1500;Body;Body;Body;Body;   | N_Shore | RDMR |
| NR_029434;NM_002892;NR_029434; | TSS200;TSS1500;TSS200;TSS1500; | Island  |      |
| NM_001011537;NM_001145         | TSS1500;5'UTR;TSS1500;TSS1500; | N_Shore | RDMR |
| NR_026704                      | TSS1500                        |         |      |
| NM_005500;NR_027280;NM_005500; | Body;Body;Body;Body;           | S_Shore |      |
| NM_152520;NR_031659            | 5'UTR;TSS200                   | N_Shore |      |
| NM_005829;NR_023361            | Body;Body                      | N_Shore |      |
| NR_015374                      | Body                           | N_Shore |      |
| NM_178126;NR_026697;NM_178126; | 1stExon;Body;TSS200;5'UTR      | Island  |      |
| NR_027283                      | TSS1500                        | Island  |      |
| NR_027790                      | TSS1500                        |         |      |
| NR_029692                      | TSS200                         | Island  |      |
| NR_026968;NM_033625;NM_026968; | TSS200;TSS200;TSS200           |         |      |
| NM_001142327;NM_021145         | 5'UTR;TSS200;1stExon;1stExon;  | Island  |      |
| NR_030588;NM_017415            | TSS200;Body                    |         |      |
| NM_014596;NM_170783;NR_014596; | TSS1500;TSS1500;Body           | N_Shore |      |
| NR_027026;NR_027028            | Body;Body                      |         |      |
| NM_014620;NR_003084;NM_014620; | 5'UTR;Body;1stExon;1stExon;    | N_Shore |      |
| NR_026906;NR_026905            | Body;Body                      |         |      |
| NM_001165031;NM_012145         | Body;Body;Body                 | Island  |      |
| NR_029512                      | TSS200                         | N_Shelf |      |
| NM_001033088;NR_028052         | TSS1500;TSS1500                | Island  |      |
| NR_026968;NM_033625;NM_026968; | TSS200;TSS200;TSS200           |         |      |
| NM_019057;NR_024019            | Body;Body                      | N_Shore |      |
| NM_178463;NR_029676            | Body;TSS200                    |         |      |
| NM_001159767;NM_020319         | TSS200;TSS1500;TSS200;TSS200;  | Island  |      |
| NR_024246                      | TSS1500                        |         |      |
| NM_014167;NR_033192;NM_014167; | TSS1500;TSS200;Body            | Island  |      |
| NM_001142273;NM_015282         | Body;Body;Body;TSS200          | S_Shore |      |
| NR_026751;NM_170783;NM_026751; | TSS200;1stExon;1stExon;5'UTR   | Island  |      |
| NM_019012;NR_026568            | Body;Body                      | Island  |      |
| NM_016040;NR_030761;NM_016040; | TSS1500;TSS1500;TSS1500;Body;  | S_Shore |      |
| NR_024431;NR_024429;NR_024431; | Body;Body;Body                 | Island  |      |
| NR_024458;NM_003295            | TSS1500;Body                   | Island  |      |
| NM_177524;NM_177525;NR_177524; | 5'UTR;5'UTR;TSS1500;Body       | Island  |      |
| NR_002770                      | Body                           |         |      |
| NR_024240;NR_026751            | Body;Body                      | S_Shore |      |



|                         |                              |         |      |
|-------------------------|------------------------------|---------|------|
| NR_027308;NM_005919;NM  | Body;5'UTR;TSS1500;Body      | Island  |      |
| NR_028044;NR_003512;NM  | Body;Body;5'UTR;Body         | Island  | DMR  |
| NR_003512;NR_028044;NM  | Body;TSS1500;Body;5'UTR;TS   | Island  |      |
| NR_027276               | Body                         | S_Shelf |      |
| NR_003307;NR_003313;NR_ | (Body;Body;TSS200            |         |      |
| NR_002952;NR_003697     | TSS1500;Body                 | N_Shore |      |
| NR_002835;NM_005328     | Body;5'UTR                   | S_Shore |      |
| NR_024538;NM_000850;NM  | Body;3'UTR;Body              |         |      |
| NM_001145269;NR_026879; | Body;Body;Body               | S_Shore |      |
| NR_024282               | TSS200                       | Island  |      |
| NR_028339;NR_028340     | TSS200;TSS200                | S_Shore |      |
| NR_026805               | Body                         |         |      |
| NR_024207               | Body                         | N_Shore |      |
| NR_026850               | Body                         | Island  |      |
| NR_031592;NM_007065     | TSS1500;TSS200               | Island  |      |
| NR_027276               | Body                         | S_Shelf |      |
| NR_003272;NM_001042414; | Body;1stExon;5'UTR           | Island  |      |
| NM_078473;NM_001024380  | Body;5'UTR;TSS1500;TSS1500   | N_Shore |      |
| NM_004640;NR_003065;NM  | 5'UTR;TSS200;5'UTR           | N_Shore |      |
| NM_031895;NR_030632     | Body;TSS1500                 | N_Shore |      |
| NR_002787               | Body                         | S_Shore |      |
| NR_004858;NM_133635;NR_ | TSS1500;TSS1500;Body;TSS15   | Island  |      |
| NR_026592               | Body                         | Island  |      |
| NM_052924;NR_026785     | TSS200;TSS200                | Island  |      |
| NR_026914               | Body                         | N_Shelf |      |
| NM_001141969;NR_024517; | Body;Body;TSS1500;Body;Bo    | N_Shore |      |
| NM_207356;NR_024455     | Body;TSS1500                 | N_Shore |      |
| NR_003131               | Body                         | Island  |      |
| NR_027092;NR_027093;NR_ | (Body;TSS1500;Body           | Island  | DMR  |
| NR_027840;NM_032288;NM  | Body;Body;5'UTR;TSS1500      | Island  |      |
| NR_015436               | Body                         | N_Shore | DMR  |
| NR_033204;NR_033201;NR_ | (TSS200;Body;TSS200;Body;Bc  | Island  |      |
| NM_001025232;NR_027932; | 3'UTR;TSS1500;TSS1500        |         |      |
| NR_003679               | Body                         | Island  | DMR  |
| NR_003697               | Body                         | N_Shelf |      |
| NM_001143979;NR_030159; | TSS1500;TSS1500;5'UTR        |         |      |
| NM_100486;NM_016628;NM  | 1stExon;5'UTR;1stExon;5'UTR  | Island  |      |
| NR_026693               | Body                         | Island  |      |
| NR_027766;NR_002949     | TSS1500;TSS1500              | N_Shore |      |
| NM_018320;NR_029192;NR_ | TSS200;TSS1500;TSS200;TSS200 |         |      |
| NR_027308;NM_001145785; | Body;Body;Body;Body          | Island  |      |
| NR_030717;NM_003083     | Body;Body                    | Island  | RDMR |
| NR_028340;NR_028339;NM  | Body;Body;3'UTR              | N_Shelf |      |
| NR_027294;NM_147195     | Body;TSS1500                 | Island  |      |

|                         |                             |         |     |
|-------------------------|-----------------------------|---------|-----|
| NR_004054;NM_014676;NM  | TSS1500;Body;Body           |         |     |
| NM_199189;NR_003141     | TSS1500;TSS1500             | N_Shore |     |
| NM_014676;NR_004054;NM  | Body;TSS1500;Body           |         |     |
| NR_029402;NR_029403;NM  | Body;Body;Body;Body;Body;1  | Island  |     |
| NR_026876               | Body                        | Island  |     |
| NR_026804               | Body                        | N_Shore |     |
| NR_024154;NM_001105663  | TSS1500;TSS1500             | N_Shore |     |
| NR_002754;NR_002755;NM  | Body;Body;TSS1500           | S_Shore |     |
| NR_026864               | Body                        | Island  |     |
| NR_015370;NR_002922     | Body;TSS1500                | Island  |     |
| NM_152872;NM_152871;NM  | Body;Body;Body;Body;Body;5  | Island  |     |
| NM_001656;NM_001093755  | 5'UTR;TSS1500;5'UTR;TSS150  | Island  |     |
| NR_015441               | TSS200                      | Island  |     |
| NR_002894               | Body                        | Island  |     |
| NR_027064               | Body                        | Island  | DMR |
| NR_028044;NR_003512;NM  | Body;Body;5'UTR;5'UTR;Body  | Island  | DMR |
| NR_026781;NR_026780     | Body;Body                   | Island  |     |
| NM_001159767;NM_020319  | TSS200;TSS1500;TSS200;TSS2  | Island  |     |
| NR_003296               | TSS1500                     |         |     |
| NR_030175               | TSS200                      |         |     |
| NM_138638;NR_028130;NM  | Body;Body;TSS1500;Body;Bo   | N_Shore |     |
| NR_002791               | Body                        | Island  |     |
| NM_152872;NM_152871;NM  | Body;Body;Body;Body;Body;5  | Island  |     |
| NM_004640;NR_003065;NM  | 5'UTR;TSS1500;5'UTR         | N_Shore |     |
| NR_031666               | Body                        | Island  | DMR |
| NR_027653;NM_001160124; | Body;Body;Body;Body         | N_Shore |     |
| NM_000984;NR_000013     | Body;TSS200                 | S_Shore |     |
| NR_026691;NM_001558     | Body;Body                   | Island  |     |
| NM_007294;NM_007299;NR  | 5'UTR;5'UTR;TSS200;5'UTR;1  | N_Shore |     |
| NR_026698;NM_002264     | Body;5'UTR                  | N_Shore |     |
| NR_030600               | TSS1500                     |         |     |
| NM_022818;NR_024568     | Body;TSS1500                | Island  |     |
| NM_032410;NR_027669;NM  | Body;TSS1500;TSS1500;TSS1   | Island  |     |
| NM_001362;NR_031649     | TSS200;TSS1500              | Island  |     |
| NM_012322;NR_024466;NM  | TSS200;Body;5'UTR;5'UTR     | Island  |     |
| NR_026732;NR_026731     | Body;Body                   | S_Shore |     |
| NR_033203;NR_033205;NR  | (Body;Body;Body;Body;Body;5 | Island  |     |
| NR_001282               | Body                        | Island  |     |
| NM_005328;NR_002835;NM  | 1stExon;Body;5'UTR          | S_Shore |     |
| NR_024282               | TSS1500                     | Island  |     |
| NR_027282;NM_152644     | Body;TSS200                 | Island  | DMR |
| NR_015357               | Body                        | N_Shore |     |
| NM_015916;NR_024552;NM  | 5'UTR;Body;1stExon          | Island  |     |
| NR_026901               | Body                        | Island  |     |

|                                                                                           |                                                                                                         |                                        |      |
|-------------------------------------------------------------------------------------------|---------------------------------------------------------------------------------------------------------|----------------------------------------|------|
| NR_024595                                                                                 | Body                                                                                                    | N_Shore                                |      |
| NM_003626;NM_177423;NR_030803;NM_017974;NR_027622;NR_024409;NM_026860;NR_026861;NR_003061 | Body;Body;TSS1500<br>Body;Body;Body<br>TSS200;TSS200;1stExon<br>Body;Body;TSS200<br>Body                | N_Shore<br>Island<br>N_Shore           |      |
| NR_003061                                                                                 | Body                                                                                                    | N_Shore                                | DMR  |
| NM_003391;NR_024047                                                                       | Body;Body                                                                                               | N_Shore                                |      |
| NR_029380                                                                                 | Body                                                                                                    | Island                                 | DMR  |
| NR_028514;NM_130766;NM_028050;NR_028051;NR_024600;NM_138929;NR_001130136;NM_001130        | TSS1500;5'UTR;5'UTR;Body<br>Body;Body;Body;Body<br>Body;3'UTR;Body;3'UTR<br>5'UTR;5'UTR;TSS1500;1stExon | Island<br>N_Shore<br>S_Shelf<br>Island |      |
| NR_024405;NR_024403                                                                       | TSS1500;TSS1500                                                                                         | N_Shore                                |      |
| NM_021953;NM_202002;NR_026903                                                             | 5'UTR;5'UTR;TSS1500;TSS1500<br>Body                                                                     | Island<br>N_Shelf                      |      |
| NM_033228;NM_024941;NR_033203;NR_033204;NR_026751                                         | Body;TSS1500;Body;Body;TSS1500;Body<br>Body;Body;Body;TSS1500;Body<br>Body                              | N_Shore<br>S_Shore<br>N_Shelf          |      |
| NR_033203;NR_033204;NR_026751                                                             | Body;Body;Body;TSS1500;Body                                                                             | S_Shore                                | DMR  |
| NR_003111                                                                                 | TSS1500                                                                                                 |                                        |      |
| NR_027816;NM_152744                                                                       | Body;Body                                                                                               |                                        |      |
| NR_024596;NM_016401;NR_024409;NM_003262;NR_029697                                         | TSS1500;TSS200;TSS200;TSS200<br>Body;TSS1500;Body<br>TSS1500                                            | N_Shore<br>N_Shore                     |      |
| NR_029697                                                                                 | TSS1500                                                                                                 | N_Shore                                | CDMR |
| NR_027489;NM_001159377;NR_024370;NR_015396;NM_003932                                      | TSS1500;TSS1500;TSS1500;TSS1500<br>TSS200;TSS1500;TSS1500<br>TSS200;TSS1500;TSS1500                     | Island<br>S_Shore<br>S_Shore           |      |
| NR_003932                                                                                 | TSS1500                                                                                                 |                                        |      |
| NR_029865;NR_029866                                                                       | TSS200;TSS1500                                                                                          |                                        |      |
| NM_015363;NM_001146327                                                                    | TSS200;TSS200;TSS200;TSS200                                                                             | Island                                 |      |
| NM_016426;NR_024009                                                                       | Body;TSS1500                                                                                            | Island                                 |      |
| NR_024349                                                                                 | Body                                                                                                    | Island                                 |      |
| NR_026804;NM_016531                                                                       | Body;TSS1500                                                                                            | Island                                 |      |
| NM_001135629;NM_001135                                                                    | TSS1500;TSS1500;TSS1500;TSS1500                                                                         | N_Shore                                |      |
| NR_015399                                                                                 | Body                                                                                                    |                                        |      |
| NM_001163391;NR_028077                                                                    | TSS1500;TSS1500                                                                                         | S_Shore                                |      |
| NM_001134340;NR_027329;NR_027270                                                          | TSS1500;Body;Body;Body;TSS1500<br>TSS200                                                                | S_Shore<br>S_Shore                     |      |
| NR_027270                                                                                 | TSS200                                                                                                  | S_Shore                                |      |
| NM_001165415;NM_001165                                                                    | 5'UTR;TSS1500;5'UTR;Body;5'                                                                             | Island                                 |      |
| NM_002136;NR_002944;NR_024114;NM_175888                                                   | TSS1500;TSS1500;TSS1500;5'<br>TSS1500;TSS1500                                                           | Island<br>N_Shore                      |      |
| NR_024114;NM_175888                                                                       | TSS1500;TSS1500                                                                                         | N_Shore                                |      |
| NR_027368;NM_006627                                                                       | Body;Body                                                                                               | S_Shore                                |      |
| NR_027345;NR_027346                                                                       | TSS200;TSS200                                                                                           |                                        |      |
| NR_027774;NR_027782;NM_001160300;NM_052839                                                | TSS1500;TSS1500;TSS1500<br>TSS1500;TSS1500;TSS1500                                                      | S_Shore<br>Island                      |      |
| NR_024260;NM_015509                                                                       | TSS200;TSS200                                                                                           | N_Shore                                |      |

|                                                                       |                                                  |         |      |
|-----------------------------------------------------------------------|--------------------------------------------------|---------|------|
| NM_001114632;NM_005090                                                | TSS200;TSS200;TSS200                             | Island  |      |
| NM_019094;NM_199040;NR_024233;NM_020228;NR_002818                     | Body;Body;Body                                   | S_Shore |      |
| NR_024233;NM_020228;NR_002818                                         | Body;TSS200;TSS200                               | Island  |      |
| NR_002818                                                             | TSS200                                           | Island  |      |
| NM_021095;NR_028323                                                   | 5'UTR;Body                                       | N_Shore | CDMR |
| NR_024627                                                             | TSS1500                                          | Island  |      |
| NR_003929                                                             | TSS200                                           |         |      |
| NR_003955                                                             | Body                                             | S_Shore |      |
| NR_027463;NM_004860                                                   | Body;TSS200                                      | Island  |      |
| NM_002402;NM_177524;NR_026992                                         | TSS1500;5'UTR;5'UTR;TSS1500                      | Island  |      |
| NR_026992                                                             | Body                                             |         |      |
| NM_145039;NR_003228;NR_027255;NM_001080395                            | 3'UTR;TSS1500;1stExon;TSS1500                    | N_Shore |      |
| NR_027255;NM_001080395                                                | TSS1500;Body                                     | N_Shore |      |
| NM_198595;NM_001134647                                                | Body;Body;Body                                   | N_Shelf |      |
| NM_018371;NM_001130518                                                | Body;Body;Body                                   | Island  |      |
| NM_020456;NR_023351;NR_018412;NR_002329;NR_006317;NR_027253           | TSS200;TSS200;TSS200                             | Island  |      |
| NR_002329;NR_006317;NR_027253                                         | TSS200;TSS1500;Body;TSS200                       | N_Shore |      |
| NM_006317;NR_027253                                                   | 5'UTR;TSS1500                                    | Island  | DMR  |
| NM_006195;NR_024123;NR_003246                                         | 1stExon;Body;TSS1500;Body                        | Island  |      |
| NR_003246                                                             | TSS200                                           |         |      |
| NR_004862;NM_001039693;NR_024506;NM_001008910                         | TSS200;TSS200;Body                               | Island  |      |
| NR_024506;NM_001008910                                                | 5'UTR;TSS1500;TSS1500                            | N_Shore |      |
| NR_003038;NR_003044;NR_003093;NM_198256;NR_028495;NR_028494;NR_004401 | Body;TSS1500;TSS1500                             | Island  |      |
| NR_003093;NM_198256;NR_028495;NR_028494;NR_004401                     | Body;Body;Body;Body;Body                         | N_Shore |      |
| NR_028495;NR_028494;NR_004401                                         | TSS1500;TSS1500;TSS1500;TSS1500                  | S_Shore |      |
| NR_004401                                                             | Body                                             | N_Shore |      |
| NM_001144943;NM_001142                                                | TSS1500;TSS1500;TSS1500;TSS1500                  | N_Shore |      |
| NR_024271                                                             | TSS200                                           | S_Shore |      |
| NM_000528;NM_001099737                                                | TSS1500;5'UTR;Body                               | N_Shore |      |
| NM_001042512;NM_001017                                                | Body;Body;Body;Body;Body;Body;Body               |         |      |
| NR_027156                                                             | Body                                             | Island  |      |
| NR_029583                                                             | TSS1500                                          |         |      |
| NM_053005;NM_001004325                                                | Body;1stExon;Body                                |         |      |
| NR_024040;NM_018371                                                   | Body;5'UTR                                       | S_Shelf |      |
| NR_026854                                                             | Body                                             | S_Shore |      |
| NR_030176;NR_029704                                                   | TSS1500;TSS200                                   |         |      |
| NR_002824                                                             | Body                                             |         |      |
| NM_005484;NM_001042618                                                | Body;Body;TSS1500                                |         |      |
| NR_024435;NR_024434;NR_002971;NM_080686                               | Body;Body;TSS1500                                | Island  |      |
| NR_002971;NM_080686                                                   | TSS1500;Body                                     | S_Shore |      |
| NR_001566                                                             | TSS1500                                          | S_Shore |      |
| NR_024056;NR_024057;NR_026838;NR_026840;NR_002974;NM_014949           | TSS1500;TSS1500;TSS200;TSS1500                   | Island  |      |
| NR_026838;NR_026840;NR_002974;NM_014949                               | TSS200;TSS200;TSS200;5'UTR;1stExon;TSS200;TSS200 |         |      |
| NR_002974;NM_014949                                                   | TSS1500;Body                                     |         |      |

|                         |                            |         |      |
|-------------------------|----------------------------|---------|------|
| NR_024469;NM_004584     | Body;TSS1500               | N_Shore |      |
| NR_026893               | TSS1500                    | S_Shore |      |
| NR_026597               | TSS200                     | Island  |      |
| NM_001142587;NM_001142  | TSS1500;TSS1500;TSS1500;B  | N_Shore |      |
| NM_138797;NR_030395     | TSS1500;TSS200             | S_Shore |      |
| NR_024332;NM_017739     | Body;TSS1500               |         |      |
| NM_024721;NR_024360     | TSS1500;Body               | N_Shore | CDMR |
| NM_018022;NM_001136217  | TSS1500;TSS200;TSS200;TSS2 | N_Shore |      |
| NM_001136123;NM_018121  | TSS200;TSS200;TSS200       | N_Shore |      |
| NM_001011537;NM_001145  | TSS1500;5'UTR;TSS1500;TSS1 | N_Shore | RDMR |
| NM_016531;NR_026804     | 5'UTR;TSS200               | Island  |      |
| NR_003654;NR_004859     | TSS1500;TSS1500            | N_Shore |      |
| NR_033203;NR_033204;NR_ | Body;Body;Body;Body;TSS20  | Island  |      |
| NR_015448               | Body                       |         | CDMR |
| NR_003660               | TSS200                     | Island  |      |
| NR_027430;NR_027428;NM_ | Body;Body;Body;Body;Body;E | Island  |      |
| NR_004397               | TSS1500                    | Island  |      |
| NM_001145374;NR_026930; | Body;Body;Body;Body;Body   | N_Shore |      |
| NR_027103               | TSS200                     |         |      |
| NR_023319;NR_023318;NM_ | Body;Body;Body             | N_Shore |      |
| NR_003936               | TSS200                     | Island  | DMR  |
| NR_001298               | TSS1500                    |         |      |
| NR_029856               | TSS200                     |         |      |
| NR_027126;NR_027125;NM_ | Body;Body;Body             |         |      |
| NM_001143771;NM_001143  | TSS200;TSS200;TSS200;TSS2  | Island  |      |
| NM_016531;NR_026804     | TSS200;Body                | Island  |      |
| NR_024488               | Body                       | Island  |      |
| NR_029411               | Body                       | Island  |      |
| NR_027270               | TSS1500                    | S_Shore |      |
| NR_027049               | TSS1500                    | N_Shore |      |
| NR_029841;NR_030389     | TSS1500;TSS200             |         |      |
| NR_004053;NM_003106     | Body;TSS1500               | N_Shore |      |
| NM_206826;NM_014366;NM  | Body;Body;Body;TSS1500     |         |      |
| NR_002995;NR_004380     | TSS1500;TSS200             | Island  |      |
| NR_003581;NR_003582     | TSS1500;TSS1500            |         |      |
| NR_023313;NR_027271;NM_ | Body;TSS200;5'UTR;Body     | S_Shore |      |
| NR_026583               | Body                       |         |      |
| NR_026587;NM_001143943; | Body;Body;Body;Body;Body   | Island  |      |
| NR_027476;NM_032750;NM  | TSS200;TSS200;TSS1500;TSS2 | N_Shore |      |
| NR_026667               | Body                       |         |      |
| NR_026693               | Body                       | S_Shelf |      |
| NR_028387;NM_004761     | Body;Body                  | N_Shelf |      |
| NR_001298               | Body                       |         |      |
| NM_001146178;NM_016291  | TSS1500;TSS1500;TSS1500;T  | S_Shore |      |

|                               |                                      |         |      |
|-------------------------------|--------------------------------------|---------|------|
| NR_024153;NR_015431           | TSS200;Body                          | Island  |      |
| NM_001079522;NR_027123;       | TSS1500;Body;TSS1500;TSS1500;TSS1500 | N_Shore |      |
| NR_027393                     | Body                                 | Island  |      |
| NR_024596;NM_016401;NR_024596 | TSS1500;TSS200;TSS200;TSS200         |         |      |
| NR_029380;NM_006562           | TSS200;TSS1500                       | Island  | DMR  |
| NR_029373;NR_029374           | TSS1500;Body                         | Island  | RDMR |
| NM_001164246;NM_017847        | TSS1500;TSS1500;Body;TSS1500         | Island  |      |
| NM_018280;NR_027034           | TSS200;Body                          | Island  |      |
| NR_003099;NM_021148           | TSS200;TSS200                        |         |      |
| NM_018840;NR_026562;NM_018840 | TSS1500;TSS1500;TSS1500              | N_Shore |      |
| NR_002799;NM_002106           | TSS1500;Body                         | Island  |      |
| NR_027790                     | TSS200                               |         |      |
| NR_024271                     | TSS1500                              | S_Shore |      |
| NR_027762;NM_015014;NM_015014 | TSS1500;TSS1500;TSS1500              | S_Shore |      |
| NR_026951                     | Body                                 | N_Shore |      |
| NM_014941;NR_002323           | TSS1500;TSS1500                      | Island  |      |
| NR_002605;NR_002612           | Body;Body                            | S_Shore |      |
| NR_026950                     | Body                                 | Island  |      |
| NR_003561;NR_027768           | TSS1500;TSS1500                      | S_Shore |      |
| NR_024079                     | TSS1500                              | S_Shore |      |
| NR_004401;NM_145807           | Body;3'UTR                           | Island  |      |
| NM_001040144;NM_001039        | TSS1500;TSS1500;TSS1500;TSS1500      | Island  |      |
| NR_027927;NM_014296           | TSS1500;Body                         | S_Shore |      |
| NR_026719                     | Body                                 | N_Shore |      |
| NM_004071;NR_027855;NM_004071 | 5'UTR;Body;Body;Body                 | N_Shelf | RDMR |
| NR_003099;NM_021148           | TSS1500;TSS1500                      |         |      |
| NR_026956                     | TSS200                               |         |      |
| NR_026997                     | Body                                 | Island  |      |
| NR_001590                     | TSS200                               | N_Shore |      |
| NR_027671;NM_020120;NM_020120 | Body;1stExon;5'UTR                   | Island  |      |
| NM_012230;NR_029411;NM_012230 | 3'UTR;Body;Body                      |         |      |
| NR_024627                     | TSS1500                              | Island  |      |
| NM_021131;NM_178000;NM_021131 | 5'UTR;TSS200;TSS200;TSS1500          | Island  |      |
| NR_026717                     | TSS1500                              | N_Shelf |      |
| NM_152410;NM_001080378        | Body;Body;Body;Body                  |         |      |
| NM_001130136;NR_027073;       | 5'UTR;TSS200;TSS1500;TSS1500         | Island  |      |
| NM_001170634;NR_028388;       | TSS1500;TSS1500;TSS1500;TSS1500      | N_Shore |      |
| NM_001031738;NM_153342        | 5'UTR;5'UTR;Body                     | Island  |      |
| NM_005328;NR_002835           | TSS1500;Body                         | S_Shore |      |
| NR_027786                     | TSS1500                              | N_Shore |      |
| NM_100486;NM_016628;NR_016628 | Body;Body;Body                       | Island  |      |
| NM_001142348;NM_001142        | Body;5'UTR;Body;Body                 | N_Shore | CDMR |
| NR_003579                     | Body                                 | Island  |      |
| NR_002710                     | Body                                 | Island  |      |

|                         |                                                  |         |      |
|-------------------------|--------------------------------------------------|---------|------|
| NR_024623;NR_024622     | Body;Body                                        | S_Shelf |      |
| NR_015357               | Body                                             | S_Shore |      |
| NR_027908               | TSS200                                           | S_Shore |      |
| NR_029623               | TSS200                                           | Island  |      |
| NM_001280;NR_027271;NR_ | TSS1500;Body;TSS1500;TSS1500                     | Island  |      |
| NR_027701               | Body                                             |         |      |
| NR_004401;NM_001352     | TSS1500;TSS200                                   | Island  |      |
| NR_033203;NR_033204;NR_ | Body;Body;Body;TSS1500;Bo                        | N_Shore |      |
| NR_027276               | Body                                             | S_Shore |      |
| NR_027051;NM_030573;NR_ | Body;TSS1500;Body;TSS1500                        | S_Shore |      |
| NR_029401               | TSS1500                                          | S_Shore |      |
| NR_002141               | Body                                             |         |      |
| NR_027397;NM_001146039; | TSS200;TSS200;TSS200                             |         |      |
| NR_015346;NM_001114632; | Body;Body;Body                                   | S_Shelf |      |
| NR_001593;NM_000980     | TSS200;TSS200                                    | Island  |      |
| NM_018489;NR_027023     | TSS1500;Body                                     | S_Shore |      |
| NR_024573;NM_032484;NM  | TSS200;5'UTR;1stExon;1stExon;5'UTR;1stExon;5'UTR |         |      |
| NR_000015;NR_000024;NM_ | TSS1500;TSS1500;TSS1500                          | N_Shore |      |
| NR_026826;NM_001145159; | TSS1500;TSS1500;5'UTR;1stE                       | S_Shore |      |
| NM_018320;NR_024148;NR_ | Body;Body;TSS1500;Body                           |         |      |
| NR_027320               | TSS200                                           | S_Shore |      |
| NR_024343               | Body                                             |         |      |
| NR_024621;NM_139022;NM  | Body;TSS1500;Body                                |         |      |
| NR_003239;NR_002972     | TSS200;TSS1500                                   | Island  |      |
| NR_024253               | Body                                             | N_Shelf |      |
| NM_175888;NR_024114     | TSS200;TSS200                                    | N_Shore |      |
| NM_199191;NM_199193;NM  | TSS1500;TSS1500;TSS1500;TSS1500                  | N_Shore |      |
| NR_024009;NM_016426     | TSS1500;5'UTR                                    | Island  |      |
| NM_153264;NR_022012;NM  | 5'UTR;Body;1stExon                               | Island  |      |
| NM_001280;NR_027271;NR_ | TSS1500;Body;TSS1500;TSS1500                     | Island  |      |
| NM_212465;NM_173088;NR_ | Body;TSS1500;Body;Body;Body;Body;Body            |         |      |
| NM_018489;NR_030282     | Body;TSS1500                                     |         |      |
| NM_001145783;NM_134440  | Body;TSS1500;Body;5'UTR;Bc                       | N_Shore |      |
| NM_001142464;NR_024551; | TSS200;TSS1500;TSS200;TSS200                     | S_Shore |      |
| NR_023350;NM_004766     | TSS1500;TSS1500                                  | Island  |      |
| NR_027816;NM_152744     | Body;Body                                        |         |      |
| NR_027816;NM_152744     | Body;Body                                        |         |      |
| NR_003582;NR_003581     | TSS200;TSS200                                    |         |      |
| NR_003042;NM_004582     | TSS1500;TSS1500                                  |         |      |
| NM_024506;NM_001008910  | 5'UTR;TSS1500;1stExon;TSS1500                    | Island  |      |
| NR_015447               | Body                                             | S_Shore | RDMR |
| NR_024117               | TSS200                                           | Island  |      |
| NR_029192               | Body                                             |         |      |
| NR_000034               | TSS1500                                          | Island  |      |

|                         |                                             |         |     |
|-------------------------|---------------------------------------------|---------|-----|
| NR_004383;NM_033377     | TSS1500;Body                                |         |     |
| NR_026892               | TSS200                                      |         |     |
| NR_002582;NM_001007074; | TSS1500;TSS1500;TSS1500;TSS                 | S_Shore |     |
| NR_003334;NR_003335     | Body;TSS1500                                |         |     |
| NR_026926;NR_026925     | Body;Body                                   |         |     |
| NR_027410               | Body                                        | Island  | DMR |
| NR_002818               | Body                                        | Island  |     |
| NM_004824;NR_026590;NM  | Body;Body;Body;Body                         |         |     |
| NR_026736;NM_017906;NM  | Body;TSS1500;TSS200;TSS200                  | (Island |     |
| NR_029869               | TSS1500                                     |         |     |
| NM_001416;NR_002918     | Body;TSS1500                                | Island  |     |
| NR_031646;NM_004734     | Body;Body                                   |         |     |
| NR_026866               | TSS1500                                     |         |     |
| NR_026965               | TSS200                                      |         |     |
| NR_028287               | Body                                        | N_Shelf |     |
| NR_026776;NR_026775     | TSS200;Body                                 | S_Shore |     |
| NR_003955               | Body                                        | Island  |     |
| NM_152410;NM_001080378  | Body;Body;Body;Body                         |         |     |
| NM_018489;NR_027023     | TSS1500;Body                                | Island  |     |
| NR_028493;NM_020466;NR_ | TSS200;Body;TSS200;TSS200                   | Island  |     |
| NR_031593;NM_198552     | TSS200;Body                                 |         |     |
| NR_029681;NM_199424;NM  | TSS200;Body;Body                            |         |     |
| NR_027258               | TSS200                                      | Island  |     |
| NR_024444               | TSS1500                                     | S_Shore |     |
| NM_194325;NR_024018;NM  | 5'UTR;Body;5'UTR;5'UTR                      | Island  |     |
| NR_026997               | Body                                        | Island  |     |
| NM_001031716;NR_024415  | TSS1500;TSS1500                             | N_Shore |     |
| NM_013291;NR_031600     | Body;TSS200                                 | S_Shelf |     |
| NM_004945;NR_029586;NM  | Body;TSS1500;Body;Body;Body                 |         |     |
| NM_001137605;NR_024427; | 5'UTR;Body;TSS200;1stExon;TSS200;Body;5'UTR |         |     |
| NR_027165;NR_027168;NR_ | Body;Body;Body;Body;Body;B                  | Island  |     |
| NR_003330;NR_003331     | Body;TSS1500                                |         |     |
| NM_001142623;NM_032484  | Body;Body;Body;Body                         |         |     |
| NR_027701               | Body                                        |         |     |
| NR_015433               | TSS1500                                     | N_Shore |     |
| NR_026837;NM_013381;NR_ | Body;1stExon;Body                           | Island  |     |
| NR_033203;NR_033204;NR_ | Body;Body;Body;Body;TSS200                  | (Island |     |
| NR_026791               | Body                                        | Island  |     |
| NM_001009944;NR_030646; | Body;TSS1500;Body                           | Island  |     |
| NR_030193               | TSS1500                                     |         |     |
| NM_014053;NR_027286;NR_ | 1stExon;TSS1500;TSS1500                     | Island  |     |
| NR_002932               | Body                                        |         |     |
| NR_026762               | TSS1500                                     | N_Shore |     |
| NM_006041;NR_026880     | Body;Body                                   | Island  |     |



|                                                             |                                 |         |      |
|-------------------------------------------------------------|---------------------------------|---------|------|
| NM_001100592;NM_145230                                      | Body;Body;TSS1500               | S_Shore |      |
| NR_003110                                                   | Body                            | Island  |      |
| NM_153264;NR_022012                                         | TSS1500;TSS1500                 | N_Shore |      |
| NM_001242;NR_015382                                         | TSS1500;Body                    |         |      |
| NR_024458;NM_003295                                         | TSS1500;Body                    | N_Shore |      |
| NM_001145354;NR_015431                                      | TSS200;TSS1500                  | Island  |      |
| NM_001607;NR_024024;NM_015412;NR_027794;NR_003300           | 1stExon;Body;5'UTR;TSS1500      | Island  |      |
|                                                             | TSS200;TSS200;TSS200            | Island  |      |
|                                                             | TSS1500                         |         |      |
| NM_001146184;NM_001146                                      | TSS1500;TSS1500;TSS1500;TSS1500 | S_Shore | RDMR |
| NR_003099;NM_021148                                         | TSS200;TSS200                   |         |      |
| NR_024463                                                   | TSS200                          |         |      |
| NM_032026;NM_001146160                                      | Body;5'UTR;Body;TSS1500         | N_Shore |      |
| NM_014620;NR_003084                                         | 5'UTR;Body                      | Island  |      |
| NR_026789                                                   | Body                            |         |      |
| NM_001145873;NM_001768                                      | 5'UTR;TSS1500;TSS1500;TSS1500   | S_Shore | RDMR |
| NR_026597                                                   | Body                            |         |      |
| NR_001591                                                   | Body                            | Island  |      |
| NR_024240;NR_026751                                         | Body;Body                       | Island  |      |
| NR_027822                                                   | Body                            | Island  | DMR  |
| NR_024623;NM_013329;NM_020707;NR_027753                     | Body;TSS1500;TSS1500;TSS1500    | S_Shore |      |
|                                                             | 5'UTR;TSS1500                   |         |      |
| NR_033258;NM_014795;NM_001145775;NR_027117                  | Body;5'UTR;1stExon;1stExon      | S_Shelf | DMR  |
|                                                             | 5'UTR;Body                      | Island  |      |
| NR_027653;NM_001160125                                      | TSS1500;TSS1500;TSS1500;TSS1500 | Island  |      |
| NM_153262;NR_027458;NR_028435;NM_001164710                  | Body;Body;Body;Body;Body;Body   | Island  | DMR  |
|                                                             | Body;Body;Body;Body;Body        |         |      |
| NR_027034;NM_018280                                         | Body;TSS1500                    | S_Shore |      |
| NR_024249                                                   | TSS1500                         | S_Shore |      |
| NR_024383;NR_015436;NR_001128128;NM_001128                  | Body;Body;Body                  | N_Shore | CDMR |
|                                                             | 1stExon;5'UTR;Body;Body;Body    | Island  | DMR  |
| NR_003512;NM_001007139                                      | Body;TSS1500;Body               |         | RDMR |
| NM_014463;NR_027299;NR_026921                               | TSS1500;Body;Body;Body          | N_Shore |      |
|                                                             | TSS1500                         | S_Shore |      |
| NR_031658                                                   | TSS1500                         |         |      |
| NR_024239;NM_001136111                                      | Body;Body;Body;Body;Body;Body   |         |      |
| NM_018227;NR_015439                                         | Body;TSS1500                    | Island  |      |
| NR_003063;NM_006000                                         | TSS200;Body                     | N_Shore |      |
| NR_027405;NM_006636                                         | Body;Body                       | S_Shore |      |
| NR_026590                                                   | Body                            | N_Shore | RDMR |
| NR_029405                                                   | TSS200                          |         |      |
| NR_024565;NM_001166012                                      | TSS200;5'UTR;TSS200;1stExon     | Island  |      |
| NR_003102;NM_015450;NR_028131;NM_138638;NR_028131;NM_138638 | Body;1stExon;Body;Body;5'UTR    | Island  |      |
|                                                             | TSS1500;TSS1500;TSS1500;TSS1500 | S_Shore |      |

|                         |                                                  |         |      |
|-------------------------|--------------------------------------------------|---------|------|
| NM_019009;NR_029409     | Body;TSS1500                                     | Island  |      |
| NM_001040437;NM_001040  | 5'UTR;5'UTR;1stExon;TSS200;S_Shore               |         |      |
| NM_032853;NR_024247     | 5'UTR;TSS1500                                    | S_Shore | RDMR |
| NR_024472               | Body                                             |         |      |
| NM_019116;NM_001083614  | TSS200;TSS200;TSS200                             | Island  |      |
| NM_000037;NR_030161;NM_ | 3'UTR;TSS200;Body;3'UTR;Body;Body;Body;Body;Body |         |      |
| NR_027908               | Body                                             | N_Shelf |      |
| NM_004860;NR_027463     | Body;TSS200                                      | N_Shore |      |
| NR_027812;NR_027811;NM_ | Body;Body;Body                                   | N_Shore |      |
| NM_012459;NM_003002;NR_ | TSS1500;Body;TSS1500                             | S_Shore |      |
| NR_003276               | Body                                             | Island  |      |
| NM_001141970;NR_024517; | TSS1500;TSS1500;TSS1500;TSS1500                  | S_Shore |      |
| NR_024547;NM_003876     | Body;Body                                        | Island  |      |
| NR_001591               | Body                                             | S_Shore |      |
| NM_001007593;NR_027400; | Body;Body;Body                                   | S_Shore |      |
| NR_000013;NM_000984     | TSS1500;TSS200                                   | Island  |      |
| NR_027389;NM_004970;NM_ | TSS200;TSS1500;TSS1500                           | S_Shelf |      |
| NR_029865;NR_029864;NR_ | (TSS1500;TSS200;TSS1500                          |         |      |
| NM_021643;NM_021643;NR_ | 1stExon;5'UTR;Body                               | Island  |      |
| NR_027789;NR_027788     | TSS1500;TSS1500                                  | S_Shore |      |
| NR_026766;NM_005378     | TSS200;5'UTR                                     | Island  |      |
| NR_024279;NM_015001     | TSS1500;Body                                     | Island  |      |
| NM_005663;NR_030641     | Body;TSS1500                                     | S_Shore |      |
| NR_026678;NM_015327     | TSS1500;Body                                     |         |      |
| NR_024591               | TSS200                                           | Island  |      |
| NR_002305               | Body                                             | Island  |      |
| NR_001435               | Body                                             | S_Shore |      |
| NM_001010982;NM_001145  | 1stExon;TSS200;5'UTR;TSS200                      | Island  |      |
| NR_015424               | TSS1500                                          | Island  |      |
| NR_023391               | Body                                             |         |      |
| NR_026956               | TSS1500                                          |         |      |
| NM_001722;NR_029714     | Body;TSS1500                                     | S_Shore |      |
| NR_027284;NR_026861;NR_ | (Body;TSS1500;TSS1500                            | Island  | DMR  |
| NR_027768;NR_003561     | Body;TSS200                                      | Island  |      |
| NM_001144942;NM_001144  | TSS200;Body;Body;Body;TSS200                     | Island  |      |
| NM_001170689;NM_001170  | TSS1500;TSS1500;TSS1500;TSS1500                  | N_Shore |      |
| NM_001102367;NM_001102  | 5'UTR;5'UTR;5'UTR;TSS1500;5'UTR;5'UTR            |         |      |
| NR_015422               | Body                                             | S_Shore |      |
| NR_024148;NR_029192;NM_ | Body;TSS1500;5'UTR;Body;1stExon                  |         |      |
| NM_000967;NR_000028;NM_ | Body;TSS200;Body                                 |         |      |
| NR_026761               | Body                                             | Island  |      |
| NM_000969;NR_000006     | Body;TSS1500                                     |         |      |
| NR_023380               | Body                                             |         |      |
| NR_024584               | Body                                             |         |      |

|                         |                             |         |      |
|-------------------------|-----------------------------|---------|------|
| NR_003699               | Body                        | Island  | DMR  |
| NR_030199               | TSS1500                     |         |      |
| NR_027368;NM_006627     | Body;Body                   | Island  |      |
| NM_001012957;NM_001164  | Body;Body;Body;Body;Body    |         |      |
| NR_027399;NR_027398;NM_ | TSS200;TSS200;TSS200        | Island  |      |
| NR_027238               | TSS1500                     |         |      |
| NR_002767;NM_018064     | TSS200;Body                 | N_Shore |      |
| NM_000441;NR_028137     | Body;TSS200                 | Island  |      |
| NR_003272;NM_001042414  | TSS1500;TSS1500             | S_Shore |      |
| NM_021004;NR_023921;NR_ | TSS1500;Body;Body;Body;Bo   | N_Shore |      |
| NR_024270               | Body                        | Island  |      |
| NR_024383;NR_015436     | Body;Body                   | Island  |      |
| NR_027435;NM_020801     | Body;Body                   | Island  |      |
| NR_026751               | Body                        |         |      |
| NR_027790;NR_027791     | Body;Body                   |         | RDMR |
| NM_152720;NM_001146099  | TSS1500;TSS200;TSS200;TSS2  | S_Shore |      |
| NR_027653;NM_001160124; | Body;Body;Body;Body         | Island  |      |
| NR_033186;NM_207467     | Body;5'UTR                  | S_Shore |      |
| NR_004053               | Body                        | Island  | DMR  |
| NM_005047;NR_024408     | TSS200;TSS200               | Island  |      |
| NR_027633;NM_001009877; | Body;Body;Body              | Island  |      |
| NR_023385;NR_023384;NR_ | (TSS200;TSS200;TSS200       | N_Shore |      |
| NR_024178               | Body                        |         |      |
| NR_028295               | TSS200                      | S_Shore |      |
| NR_028044;NR_003512;NM_ | Body;Body;5'UTR;Body        | Island  | DMR  |
| NR_027703;NM_052988;NM_ | TSS200;TSS200;TSS200;TSS20  | Island  |      |
| NM_022906;NR_022007     | 5'UTR;TSS1500               | S_Shore |      |
| NR_026865;NM_030936     | Body;TSS1500                | Island  | DMR  |
| NM_022103;NR_030740     | TSS1500;TSS1500             | S_Shore |      |
| NR_002728;NM_000218;NM_ | TSS1500;Body;Body           | S_Shore |      |
| NM_004197;NM_032454;NM_ | Body;Body;TSS1500;Body      | Island  |      |
| NM_005798;NM_001007278  | 5'UTR;5'UTR;5'UTR;5'UTR;1st | S_Shore |      |
| NR_015428               | TSS200                      | S_Shore |      |
| NM_052879;NM_001170803  | Body;Body;Body;Body;Body;E  | Island  |      |
| NR_024447               | TSS1500                     |         |      |
| NR_003512;NM_001007139; | Body;3'UTR;3'UTR;3'UTR      | Island  |      |
| NR_026676               | TSS1500                     | N_Shore |      |
| NR_031577               | TSS1500                     |         |      |
| NR_002328;NM_005105     | Body;3'UTR                  | S_Shelf |      |
| NR_031680               | Body                        | Island  |      |
| NM_018917;NM_032092;NM_ | Body;Body;Body;Body;Body;E  | Island  |      |
| NR_026658;NR_026655     | TSS200;Body                 | Island  |      |
| NR_027024               | Body                        |         |      |
| NR_027451               | Body                        | Island  |      |

|                               |                                         |         |      |
|-------------------------------|-----------------------------------------|---------|------|
| NR_015358                     | TSS200                                  | Island  | DMR  |
| NR_028032                     | Body                                    | Island  |      |
| NM_001130041;NM_003029        | TSS1500;TSS1500;Body;Body               | S_Shore |      |
| NM_001416;NR_002918           | Body;TSS200                             | S_Shore | RDMR |
| NM_001146184;NM_001146        | TSS1500;TSS1500;TSS1500;TSS1500         | S_Shore | RDMR |
| NM_014815;NM_001079518        | Body;Body;TSS1500                       |         |      |
| NR_002201;NM_002707;NM_002707 | Body;Body;Body                          | N_Shore |      |
| NM_025264;NR_028102           | TSS1500;TSS1500                         | S_Shore |      |
| NR_027500;NM_001037806        | TSS200;1stExon;5'UTR;TSS200             | Island  |      |
| NM_001145438;NM_001145        | Body;Body;Body;Body;Body;Body;Body;Body |         |      |
| NR_031706;NM_022720           | TSS1500;5'UTR                           | N_Shore |      |
| NM_183048;NR_024594;NM_024594 | Body;TSS1500;Body;Body                  |         |      |
| NM_001164821;NM_024770        | TSS1500;5'UTR;TSS1500;TSS1500           | N_Shore |      |
| NR_024008                     | Body                                    | N_Shore | RDMR |
| NM_001142464;NR_024551        | TSS200;TSS1500;TSS200;TSS200            | S_Shore |      |
| NM_001042424;NM_133330        | Body;Body;Body;TSS200;Body              |         |      |
| NR_024047;NM_003391           | TSS200;TSS200                           | Island  | DMR  |
| NM_016464;NM_001161454        | 5'UTR;TSS1500;TSS1500;Body              | S_Shore |      |
| NR_029380;NM_006562           | TSS200;TSS1500                          | Island  | DMR  |
| NM_001161587;NR_027763        | Body;Body;Body                          | S_Shelf |      |
| NM_001003656;NR_033191        | 5'UTR;Body;Body                         | N_Shore |      |
| NR_024455;NM_207356           | Body;TSS1500                            | Island  |      |
| NM_018412;NM_021908;NR_021908 | Body;Body;TSS1500                       |         |      |
| NR_026572;NM_001146209        | TSS1500;Body;TSS1500;Body               | S_Shore |      |
| NR_027048;NR_027047           | TSS1500;TSS1500                         |         |      |
| NM_017975;NR_003105;NM_003105 | TSS200;TSS200;TSS1500                   |         |      |
| NR_024423;NR_024424           | Body;TSS1500                            | N_Shore |      |
| NR_024270                     | TSS200                                  | Island  |      |
| NR_027816;NM_152744           | Body;Body                               |         | RDMR |
| NR_026776;NR_026775           | Body;Body                               | Island  |      |
| NM_021259;NR_024453           | TSS1500;Body                            | S_Shore | RDMR |
| NR_024237;NM_001136003        | Body;5'UTR                              | Island  | RDMR |
| NM_198468;NR_031679           | 5'UTR;Body                              | N_Shore |      |
| NM_001042383;NR_024400        | 5'UTR;TSS1500;5'UTR;TSS1500             | S_Shore | RDMR |
| NR_002754;NR_002755;NM_002755 | Body;Body;TSS1500;TSS1500               | N_Shore | RDMR |
| NM_000967;NR_002439;NM_002439 | TSS1500;TSS1500;TSS1500                 | S_Shore |      |
| NR_024277;NM_020133           | TSS1500;Body                            |         |      |
| NR_026777                     | Body                                    | Island  |      |
| NR_031738;NM_173665;NM_173665 | TSS200;5'UTR;5'UTR                      |         |      |
| NM_024033;NR_024185;NR_024185 | 1stExon;Body;Body;5'UTR                 | Island  |      |
| NR_027345;NR_027346           | TSS200;TSS200                           |         |      |
| NM_032271;NR_002736           | TSS1500;TSS200                          | Island  |      |
| NR_002594                     | Body                                    | N_Shore |      |
| NR_002174;NR_027626           | Body;Body                               | N_Shore |      |

|                         |                                       |         |      |
|-------------------------|---------------------------------------|---------|------|
| NM_006718;NM_002656;NM  | TSS1500;TSS1500;5'UTR;TSS1            | S_Shore |      |
| NR_027070               | TSS200                                |         |      |
| NR_024584               | TSS1500                               | S_Shore |      |
| NR_027331               | TSS200                                |         |      |
| NR_026791               | TSS1500                               | N_Shore |      |
| NR_002727;NM_021026     | Body;Body                             |         |      |
| NR_003525               | TSS200                                | Island  |      |
| NM_001135654;NM_003819  | Body;Body;Body;Body                   |         |      |
| NR_003713               | TSS1500                               | S_Shore |      |
| NR_015410               | TSS1500                               | Island  |      |
| NR_026875               | TSS200                                | Island  |      |
| NR_027481               | Body                                  | Island  |      |
| NM_171829;NM_171830;NM  | Body;TSS200;TSS1500;Body;Body;Body    |         |      |
| NM_001165415;NM_005566  | TSS200;TSS200;TSS200;TSS200           | N_Shore |      |
| NM_001779;NR_026665;NM  | Body;Body;Body                        | N_Shelf |      |
| NR_024436               | TSS1500                               |         |      |
| NR_029434;NR_029435;NM  | TSS1500;TSS1500;TSS200;TSS            | Island  |      |
| NR_015447               | Body                                  | S_Shore | RDMR |
| NM_001145714;NM_001145  | 3'UTR;3'UTR;Body;3'UTR                |         |      |
| NR_001283;NM_001008496  | TSS1500;5'UTR                         | Island  |      |
| NM_001005911;NM_001005  | 5'UTR;5'UTR;5'UTR;5'UTR;Bo            | N_Shelf |      |
| NR_027716;NM_177925     | TSS200;TSS200                         | N_Shore |      |
| NR_030349;NM_004664     | TSS1500;Body                          | Island  | DMR  |
| NM_006887;NR_027251     | TSS1500;Body                          | Island  |      |
| NR_015431;NR_024153     | Body;Body                             |         |      |
| NM_001144012;NM_015959  | 3'UTR;3'UTR;Body;TSS1500              | N_Shore |      |
| NR_030724;NM_020383;NM  | TSS1500;TSS1500;TSS1500               | S_Shore |      |
| NR_027692;NM_002636;NM  | TSS1500;TSS1500;TSS1500               | N_Shore |      |
| NR_028338;NM_147686;NM  | Body;5'UTR;5'UTR                      |         |      |
| NR_024455               | Body                                  | S_Shelf |      |
| NM_001126339;NM_001126  | 1stExon;5'UTR;5'UTR;Body;1s           | Island  |      |
| NM_177524;NM_002402;NM  | 5'UTR;TSS200;5'UTR;TSS1500            | Island  |      |
| NR_030765;NM_001167867; | TSS200;TSS1500;TSS1500;TSS            | S_Shore |      |
| NR_002942               | Body                                  | Island  |      |
| NR_003313;NR_003312;NR_ | (TSS1500;TSS1500;TSS1500              |         |      |
| NR_029409;NM_019009     | Body;TSS1500                          | S_Shore |      |
| NR_001457;NM_001012     | TSS200;Body                           | S_Shelf |      |
| NM_002041;NM_005254;NM  | TSS1500;TSS1500;TSS1500;TSS           | S_Shore |      |
| NR_027005               | Body                                  | N_Shore |      |
| NR_024433               | Body                                  | N_Shore |      |
| NR_027822               | TSS1500                               | N_Shore |      |
| NM_001135824;NR_024211; | 3'UTR;Body;Body;3'UTR;Body;3'UTR;Body |         |      |
| NR_003111               | TSS1500                               |         |      |
| NR_002187;NM_012470;NM  | TSS200;1stExon;5'UTR                  | Island  |      |

|                                                             |                                                                 |         |     |
|-------------------------------------------------------------|-----------------------------------------------------------------|---------|-----|
| NM_014463;NR_027299;NM_007298;NM_007300;NR_026893;NM_002702 | 1stExon;TSS200;TSS200;TSS200;Body;Body;Body;5'UTR;Body;Body     |         |     |
| NR_023918;NR_023919                                         | Body;TSS200                                                     | N_Shore |     |
| NM_012470;NR_002187                                         | TSS200;Body                                                     | Island  |     |
| NR_023392;NR_026974                                         | TSS1500;Body                                                    | S_Shore |     |
| NR_003675                                                   | TSS200                                                          | Island  |     |
| NR_027771                                                   | Body                                                            | Island  |     |
| NR_028582;NM_138387;NR_003660                               | TSS200;TSS200;TSS200                                            | Island  |     |
| NR_003660                                                   | TSS200                                                          | Island  |     |
| NM_019015;NR_030407                                         | Body;TSS1500                                                    | S_Shore |     |
| NR_024547;NM_003876;NM_002785;NM_016592                     | Body;1stExon;5'UTR                                              | Island  |     |
| NR_002785;NM_016592                                         | Body;TSS1500                                                    | N_Shore |     |
| NR_029422;NM_032311;NM_027069                               | TSS200;TSS200;TSS200                                            | Island  |     |
| NR_027069                                                   | TSS1500                                                         | Island  |     |
| NM_018917;NM_032092;NM_003034                               | Body;Body;Body;Body;Body;Body;TSS200                            | N_Shore |     |
| NR_003034                                                   | TSS200                                                          | Island  |     |
| NR_003261                                                   | TSS1500                                                         |         |     |
| NM_001145638;NM_015597                                      | Body;Body;TSS1500                                               |         |     |
| NM_005161;NR_027991                                         | TSS1500;TSS1500                                                 |         |     |
| NR_003500                                                   | Body                                                            | Island  |     |
| NR_003109;NM_017846                                         | Body;Body                                                       | Island  |     |
| NM_001170797;NR_033195;NR_021970;NM_021970;NR_026790        | Body;Body;Body;Body;Body;Body;1stExon;5'UTR;Body                | Island  |     |
| NR_026790                                                   | TSS1500                                                         | N_Shore |     |
| NR_027271;NR_023313;NR_001145640;NM_015174                  | TSS1500;Body;Body;Body                                          | S_Shore |     |
| NM_001145640;NM_015174                                      | Body;Body;Body                                                  | Island  |     |
| NR_029690;NM_199070;NR_001435                               | TSS1500;5'UTR;5'UTR;5'UTR;Body                                  | Island  |     |
| NR_001435                                                   | Body                                                            |         |     |
| NM_000978;NR_002576                                         | TSS1500;TSS1500                                                 | S_Shore | DMR |
| NR_003655                                                   | Body                                                            | N_Shore |     |
| NR_031571                                                   | TSS1500                                                         |         |     |
| NR_033258;NM_014795;NR_015447                               | Body;5'UTR;5'UTR                                                | S_Shore | DMR |
| NR_015447                                                   | TSS200                                                          | Island  |     |
| NR_024448                                                   | TSS1500                                                         | S_Shore |     |
| NR_028394;NM_001164556;NR_015448                            | Body;TSS1500;TSS1500;TSS1500;TSS1500                            | N_Shore |     |
| NR_015448                                                   | TSS200                                                          | N_Shelf |     |
| NR_030637;NR_030639;NR_024181;NM_001135590                  | TSS1500;TSS1500;TSS1500;TSS1500;TSS1500;TSS1500;TSS1500;TSS1500 | N_Shore |     |
| NR_024181;NM_001135590                                      | TSS1500;TSS1500;TSS1500                                         | S_Shore |     |
| NM_001042594;NM_015450                                      | TSS1500;TSS1500;TSS1500;TSS1500                                 | S_Shore |     |
| NR_024520;NR_024519;NM_022818;NR_024568;NR_030198;NR_030197 | TSS200;TSS200;TSS200;TSS200;1stExon;TSS200;5'UTR                | Island  |     |
| NR_030198;NR_030197                                         | TSS1500;TSS200                                                  |         |     |
| NR_026691;NM_001558                                         | Body;Body                                                       | S_Shelf |     |

|                                                   |                                                              |         |      |
|---------------------------------------------------|--------------------------------------------------------------|---------|------|
| NR_002963;NR_003584                               | TSS1500;TSS1500                                              | Island  |      |
| NM_032119;NR_003149                               | TSS200;TSS200                                                | Island  | DMR  |
| NR_026932;NM_014456;NM_006098;NR_002591           | TSS1500;TSS1500;TSS1500                                      | N_Shore |      |
| NR_026791                                         | Body                                                         | Island  |      |
| NR_028505;NR_028503;NM_024117                     | Body;Body;TSS1500;Body;TSS1500                               | Island  |      |
| NR_028138                                         | TSS1500                                                      | N_Shore |      |
| NR_015436                                         | Body                                                         | Island  |      |
| NR_027408                                         | Body                                                         | S_Shore |      |
| NM_006098;NR_002591                               | TSS1500;TSS1500                                              | N_Shore |      |
| NM_015509;NR_024260                               | 1stExon;Body                                                 | Island  |      |
| NR_029670                                         | TSS1500                                                      | Island  |      |
| NR_028044;NR_003512;NM_024516;NR_024515;NM_028595 | Body;Body;5'UTR;TSS1500;Body;Body;Body;Body;Body;Body;TSS200 | S_Shore |      |
| NR_015346;NM_005090;NM_030318;NM_024963           | Body;Body;TSS1500                                            | S_Shore |      |
| NR_030187;NR_030184                               | TSS1500;TSS1500                                              |         |      |
| NR_028390                                         | Body                                                         |         |      |
| NM_012399;NR_026962;NR_024569;NR_033182           | TSS1500;Body;Body                                            | Island  |      |
| NM_030803;NR_003008;NM_024454;NM_004546           | Body;TSS1500;Body                                            |         |      |
| NR_015436                                         | Body                                                         | Island  |      |
| NR_024330                                         | Body                                                         | Island  | RDMR |
| NR_027257                                         | TSS1500                                                      | N_Shore |      |
| NR_026776;NR_026775                               | TSS200;Body                                                  | S_Shore |      |
| NR_003695;NR_003605;NR_001145268;NM_001145        | TSS1500;Body;TSS200;TSS1500;TSS200;TSS200;TSS200             | S_Shore |      |
| NM_001160210;NR_027662;                           | TSS1500;TSS1500;TSS1500                                      | N_Shore |      |
| NM_006098;NR_002591                               | TSS1500;TSS1500                                              | S_Shore |      |
| NM_194457;NM_194315;NR_015381                     | Body;Body;Body;Body;Body                                     | N_Shore |      |
| NR_002563;NR_002564;NR_001042424;NM_133330        | TSS1500;TSS200;TSS1500;TSS1500;Body;Body;Body;TSS1500;Body   | S_Shelf |      |
| NM_005916;NM_182776;NR_027267;NR_027266           | Body;Body;TSS200                                             |         |      |
| NR_027284;NR_026861;NR_023938                     | TSS1500;TSS1500                                              | Island  |      |
| NR_029608                                         | Body;TSS200;TSS200                                           | Island  |      |
| NR_024431;NR_024429;NR_026901                     | Body                                                         | N_Shore | RDMR |
| NM_001141970;NR_024517;                           | Body;Body;Body                                               |         |      |
|                                                   | Body                                                         | Island  |      |
|                                                   | TSS1500;TSS1500;TSS1500;TSS1500                              | S_Shore |      |

|                                                                                 |                                 |         |      |
|---------------------------------------------------------------------------------|---------------------------------|---------|------|
| NR_027942;NM_001162861;                                                         | Body;Body;Body;Body;TSS1500     | N_Shore |      |
| NR_024052;NR_024053                                                             | Body;Body                       | N_Shelf |      |
| NR_026887;NM_004364                                                             | Body;TSS1500                    | Island  |      |
| NM_001142464;NR_024551;                                                         | 5'UTR;TSS1500;1stExon;1stExon   | S_Shore |      |
| NR_028040;NM_178831;NR_029497                                                   | Body;3'UTR;Body;Body;Body       |         |      |
| NR_024362;NR_024363;NR_029507;NM_004599                                         | TSS200                          | S_Shelf |      |
| NR_031607;NM_003726;NR_003263                                                   | TSS1500;TSS1500;TSS1500         | Island  |      |
| NR_003263                                                                       | TSS1500;Body                    |         |      |
| NR_003263                                                                       | Body                            | S_Shore |      |
| NM_001040649;NM_001159                                                          | Body;Body;Body                  |         |      |
| NM_001040649;NM_001159                                                          | 1stExon;TSS1500;1stExon;1stExon | Island  |      |
| NR_004382;NM_002402;NR_028338;NM_001164281;                                     | Body;TSS1500;5'UTR;TSS1500      | Island  |      |
| NR_028338;NM_001164281;                                                         | Body;Body;Body;Body;Body        |         |      |
| NR_027712                                                                       | Body                            | S_Shore |      |
| NR_002795;NM_005523                                                             | Body;TSS1500                    | N_Shore | RDMR |
| NR_015448                                                                       | Body                            |         |      |
| NR_027107                                                                       | Body                            | Island  | DMR  |
| NR_021490;NR_021491;NR_017739;NR_024332                                         | Body;Body;TSS200                | Island  |      |
| NM_017739;NR_024332                                                             | 5'UTR;Body                      |         |      |
| NR_030192                                                                       | TSS1500                         |         |      |
| NR_003365                                                                       | TSS1500                         | Island  |      |
| NM_001167830;NM_206886                                                          | 1stExon;1stExon;Body;1stExon    | Island  |      |
| NR_024360                                                                       | Body                            | N_Shelf |      |
| NR_024465;NM_006110                                                             | TSS1500;TSS200                  | S_Shore |      |
| NR_027771                                                                       | Body                            | Island  |      |
| NR_026999                                                                       | Body                            | N_Shore |      |
| NR_027503                                                                       | TSS1500                         |         |      |
| NM_000985;NR_002571;NR_028032                                                   | TSS200;TSS1500;TSS1500;TSS1500  | S_Shore |      |
| NR_028032                                                                       | Body                            | Island  |      |
| NR_024186;NM_024033;NR_153638;NR_029519;NR_021491;NR_021490;NR_026967;NM_020901 | TSS200;TSS200;TSS200            | Island  |      |
| NR_024186;NM_024033;NR_153638;NR_029519;NR_021491;NR_021490;NR_026967;NM_020901 | Body;TSS200;Body;Body           |         |      |
| NR_021491;NR_021490;NR_026967;NM_020901                                         | TSS1500;TSS1500;TSS1500         | N_Shore |      |
| NR_026967;NM_020901                                                             | TSS200;TSS1500                  | Island  |      |
| NM_014620;NR_003084;NR_003491                                                   | 5'UTR;Body;TSS1500;5'UTR        | N_Shelf |      |
| NR_003491                                                                       | Body                            | Island  | DMR  |
| NM_001143682;NR_026554;                                                         | TSS1500;TSS1500;TSS1500         |         |      |
| NR_002563;NM_002394;NR_100486;NM_016628;NR_031695;NM_001018108                  | TSS1500;TSS1500;TSS1500;TSS1500 | N_Shore |      |
| NR_100486;NM_016628;NR_031695;NM_001018108                                      | 1stExon;5'UTR;1stExon;5'UTR     | Island  |      |
| NR_031695;NM_001018108                                                          | TSS200;3'UTR                    | S_Shore |      |
| NR_002583;NM_000997                                                             | TSS1500;Body                    | N_Shelf |      |
| NR_024240;NR_026751                                                             | Body;Body                       | Island  | DMR  |
| NR_027262;NM_000520                                                             | TSS1500;Body                    | N_Shore |      |
| NR_031727                                                                       | TSS200                          | Island  |      |
| NR_027928;NM_005198;NR_027928;NM_005198;NR_027928;NM_005198;                    | Body;5'UTR;TSS200;1stExon       | Island  |      |



|                         |                                                  |         |      |
|-------------------------|--------------------------------------------------|---------|------|
| NR_003672;NR_002958;NR_ | Body;TSS1500;Body;Body                           | Island  |      |
| NR_024279               | Body                                             | Island  |      |
| NR_003367               | Body                                             |         |      |
| NM_032810;NM_032810;NR_ | 5'UTR;1stExon;TSS1500                            | Island  |      |
| NM_207292;NM_021038;NR_ | TSS1500;TSS1500;Body;Body                        | N_Shore | RDMR |
| NR_028582;NR_028581;NM_ | TSS1500;TSS1500;TSS1500                          | N_Shore |      |
| NR_026846               | Body                                             | N_Shore |      |
| NR_027469;NR_027468     | TSS1500;TSS1500                                  | S_Shore |      |
| NR_029375;NM_001099737; | TSS1500;TSS1500;Body                             | Island  | RDMR |
| NR_026765               | TSS1500                                          |         |      |
| NR_002754;NR_002755     | Body;Body                                        | N_Shelf | RDMR |
| NR_028337               | TSS200                                           | N_Shelf |      |
| NR_002773               | TSS1500                                          |         |      |
| NR_002328;NM_003846     | TSS1500;TSS200                                   | Island  |      |
| NR_003531;NR_003530;NR_ | Body;Body;Body                                   | Island  | RDMR |
| NR_001298               | Body                                             |         |      |
| NM_201435;NR_027918;NM_ | TSS200;TSS200;TSS200                             |         |      |
| NR_015454;NM_002359     | Body;TSS1500                                     | Island  |      |
| NR_002447;NR_000017;NM_ | TSS200;TSS1500;TSS1500;Bo                        | S_Shore |      |
| NR_002791               | Body                                             |         |      |
| NM_001146310;NR_024445; | Body;TSS1500;TSS200                              | Island  |      |
| NR_024362;NR_024363;NR_ | (TSS1500;TSS1500;TSS1500                         | Island  |      |
| NM_005291;NM_001161415  | 5'UTR;5'UTR;Body;Body;Body;5'UTR;Body;Body;5'UTR |         |      |
| NM_001141969;NR_024517; | 5'UTR;Body;Body;5'UTR                            | Island  |      |
| NM_052839;NR_027691;NM_ | Body;Body;Body                                   | Island  |      |
| NR_001434               | Body                                             | Island  |      |
| NR_024430               | Body                                             |         |      |
| NM_080425;NM_001077490  | TSS1500;TSS1500;3'UTR;TSS1                       | N_Shore | CDMR |

| Enhancer | CONT1       | CONT2       | CONT3       | CONT4       | CONT5       | CONT6       |
|----------|-------------|-------------|-------------|-------------|-------------|-------------|
| NA       | 0.125082016 | 0.114232995 | 0.111208411 | 0.102083839 | 0.109666144 | 0.086928838 |
| NA       | 0.035836828 | 0.035417393 | 0.027840071 | 0.028868151 | 0.023696639 | 0.034664911 |
| NA       | 0.044419514 | 0.034240819 | 0.031041931 | 0.033890847 | 0.039572344 | 0.025323966 |
| TRUE     | 0.032006664 | 0.035334547 | 0.028902706 | 0.030043345 | 0.024653864 | 0.038566155 |
| NA       | 0.125222288 | 0.099194052 | 0.121468403 | 0.103858828 | 0.076028929 | 0.111851797 |
| NA       | 0.018450685 | 0.021358408 | 0.018632620 | 0.027865381 | 0.018285199 | 0.024753456 |
| TRUE     | 0.024860348 | 0.025022921 | 0.018497334 | 0.020660368 | 0.023749787 | 0.025022720 |
| NA       | 0.046524754 | 0.048931620 | 0.038146925 | 0.039046148 | 0.040813364 | 0.051934290 |
| NA       | 0.794602410 | 0.803978279 | 0.781754977 | 0.709398503 | 0.748022248 | 0.801710365 |
| NA       | 0.023533360 | 0.017423157 | 0.022432678 | 0.026455307 | 0.018498812 | 0.022076518 |
| NA       | 0.022219273 | 0.024144025 | 0.017635097 | 0.020311778 | 0.020342278 | 0.029955970 |
| NA       | 0.018547127 | 0.017020282 | 0.014060141 | 0.019213305 | 0.016942574 | 0.020009153 |
| NA       | 0.031305341 | 0.030383024 | 0.028652293 | 0.027584617 | 0.030097698 | 0.035808273 |
| NA       | 0.794134725 | 0.867958485 | 0.825309743 | 0.784882011 | 0.787525564 | 0.809997481 |
| NA       | 0.033750226 | 0.039753031 | 0.034377757 | 0.035052035 | 0.028972409 | 0.039070148 |
| NA       | 0.019906842 | 0.018016161 | 0.019173501 | 0.016108906 | 0.020964877 | 0.023697125 |
| TRUE     | 0.186544725 | 0.175317776 | 0.193350745 | 0.187804935 | 0.150983462 | 0.201623247 |
| NA       | 0.020667003 | 0.021759174 | 0.021736705 | 0.020898913 | 0.018820734 | 0.032597118 |
| NA       | 0.131184907 | 0.115660867 | 0.115858042 | 0.097357489 | 0.141144288 | 0.105307138 |
| NA       | 0.085282578 | 0.128356274 | 0.118971998 | 0.091386285 | 0.081032238 | 0.166549395 |
| NA       | 0.025075433 | 0.029102061 | 0.030820613 | 0.037592235 | 0.033886311 | 0.036752779 |
| NA       | 0.577642398 | 0.560548369 | 0.621170992 | 0.499607571 | 0.538106479 | 0.593587141 |
| NA       | 0.720065216 | 0.817168644 | 0.761792721 | 0.769034877 | 0.793982930 | 0.768254870 |
| NA       | 0.033528384 | 0.047789021 | 0.029006925 | 0.030650968 | 0.025741081 | 0.030404157 |
| NA       | 0.037561600 | 0.031631886 | 0.026704781 | 0.031920163 | 0.024021189 | 0.041076224 |
| TRUE     | 0.026505672 | 0.029741982 | 0.031789686 | 0.026581813 | 0.023977375 | 0.035039806 |
| NA       | 0.038626447 | 0.034785157 | 0.032358398 | 0.032376148 | 0.033473471 | 0.046678667 |
| NA       | 0.561846601 | 0.593548862 | 0.493697646 | 0.559935997 | 0.555925883 | 0.506041957 |
| NA       | 0.663545311 | 0.478441324 | 0.606249451 | 0.543578499 | 0.601241509 | 0.468164727 |
| NA       | 0.031155257 | 0.027318504 | 0.024021304 | 0.025154091 | 0.025825168 | 0.036303320 |
| NA       | 0.027817603 | 0.025261916 | 0.020574125 | 0.023264378 | 0.026258670 | 0.026461600 |
| NA       | 0.896156964 | 0.903889519 | 0.924479998 | 0.911085714 | 0.874072240 | 0.880843566 |
| NA       | 0.032395235 | 0.043921766 | 0.029813467 | 0.037140777 | 0.032255344 | 0.043877480 |
| NA       | 0.473616232 | 0.506287206 | 0.478296598 | 0.397280695 | 0.418042631 | 0.373145776 |
| NA       | 0.025465891 | 0.024164463 | 0.015921642 | 0.016620364 | 0.022681740 | 0.023353082 |
| NA       | 0.201706937 | 0.201241582 | 0.194393394 | 0.182680347 | 0.257661824 | 0.191925676 |
| NA       | 0.033772402 | 0.038173357 | 0.028192666 | 0.025979129 | 0.035501478 | 0.034435821 |
| NA       | 0.323477751 | 0.372399729 | 0.331669790 | 0.329039117 | 0.392834567 | 0.411048959 |
| NA       | 0.016763736 | 0.018162636 | 0.012955149 | 0.020493173 | 0.016809627 | 0.018773210 |
| NA       | 0.034309801 | 0.027712399 | 0.025456862 | 0.039478739 | 0.031913659 | 0.034343755 |
| NA       | 0.666930688 | 0.722820289 | 0.621051791 | 0.680242343 | 0.731636524 | 0.665602520 |
| TRUE     | 0.478684606 | 0.432427469 | 0.406867365 | 0.344268175 | 0.464270008 | 0.370072904 |
| NA       | 0.077220135 | 0.051448582 | 0.060945949 | 0.043366693 | 0.083299828 | 0.087879725 |

NA 0.064020382 0.113312330 0.107320731 0.061588771 0.102159065 0.141638695  
NA 0.018846786 0.016892635 0.018730850 0.017291165 0.015385894 0.017575891  
NA 0.059505312 0.042864534 0.048072417 0.047291147 0.053047279 0.047122569  
NA 0.261937490 0.255035518 0.217160518 0.208784082 0.262843022 0.221311746  
NA 0.049973695 0.048757797 0.039351890 0.045653160 0.041364727 0.059206050  
NA 0.226796481 0.211370464 0.194033998 0.135604740 0.114889997 0.190695967  
NA 0.094241140 0.076642475 0.071012249 0.070776906 0.098707279 0.084865213  
NA 0.050751758 0.042574949 0.038354156 0.059852144 0.052553124 0.043779196  
NA 0.068773384 0.062169880 0.058395704 0.066832338 0.043929448 0.083291261  
NA 0.087289433 0.061128922 0.097603359 0.094325011 0.126722170 0.110362529  
NA 0.033970226 0.041735678 0.030995412 0.038442389 0.033484690 0.038451419  
NA 0.034037338 0.021370634 0.016574953 0.022205854 0.028261622 0.030320082  
NA 0.038234191 0.046946973 0.043594512 0.038128528 0.036707855 0.057230271  
NA 0.027077475 0.021791266 0.026374878 0.020634554 0.019496234 0.032028103  
NA 0.369116523 0.331391459 0.354763837 0.303835177 0.296090872 0.322057792  
NA 0.023642666 0.022896722 0.019155225 0.024170060 0.024017190 0.027037363  
NA 0.062369379 0.062541805 0.050917361 0.040329196 0.060438172 0.049684967  
NA 0.027093161 0.028088674 0.025031291 0.026711560 0.026891631 0.039754960  
NA 0.039851622 0.038286796 0.031896941 0.029424940 0.032383500 0.036342912  
NA 0.045640772 0.032951725 0.037478405 0.038975904 0.029984771 0.056395639  
NA 0.033316525 0.033527092 0.030535135 0.036499864 0.024421664 0.023635108  
NA 0.016506451 0.020516913 0.014707842 0.014593276 0.012012635 0.017410462  
NA 0.037630432 0.028882584 0.027479393 0.031318372 0.036782398 0.028366682  
NA 0.042780659 0.037762897 0.037420006 0.032875230 0.025725865 0.045834070  
NA 0.027780199 0.033896414 0.033767277 0.024480376 0.027119270 0.031237941  
NA 0.026747601 0.023671953 0.026630567 0.027703876 0.029137744 0.039325831  
NA 0.032660812 0.034756416 0.033940238 0.028468907 0.025389655 0.056018957  
NA 0.032221373 0.039065734 0.040950498 0.030347806 0.025941322 0.031711414  
NA 0.031215849 0.042298070 0.029074997 0.036086251 0.038408253 0.043290914  
NA 0.493680784 0.482140407 0.465340563 0.393658823 0.469250465 0.503719292  
NA 0.305875458 0.224556572 0.264530570 0.268066416 0.364757985 0.236749375  
NA 0.803604744 0.763789417 0.745039521 0.718131989 0.749662288 0.681447192  
NA 0.032339145 0.040433308 0.021302738 0.034386600 0.033681500 0.037795468  
NA 0.595791070 0.644710551 0.607579746 0.551332425 0.537817038 0.625724665  
NA 0.179844591 0.167283002 0.171349354 0.128681265 0.189704916 0.156530570  
NA 0.014326863 0.018485287 0.014518523 0.015455271 0.013004644 0.021016728  
NA 0.189236583 0.182373301 0.142640314 0.158880289 0.214609005 0.196596860  
NA 0.058374631 0.053277772 0.045225515 0.045152283 0.045465888 0.054445234  
NA 0.032685698 0.032516764 0.027061222 0.030307821 0.034048815 0.040405075  
NA 0.214792429 0.266318666 0.291009653 0.247105806 0.309681320 0.223431110  
NA 0.357488687 0.431448678 0.383632789 0.357199595 0.348567843 0.418169895  
NA 0.044412696 0.037952629 0.034994964 0.034333763 0.039848977 0.050529385  
NA 0.119206580 0.109418745 0.113986719 0.110105558 0.121834261 0.129201151  
NA 0.018616730 0.016818067 0.014471830 0.015491048 0.015969305 0.021985290

NA 0.036895129 0.039679461 0.028835831 0.035734328 0.027665348 0.046381559  
NA 0.023396191 0.025595529 0.022896699 0.025785009 0.017855057 0.031952326  
NA 0.017238816 0.014979743 0.015236044 0.015997387 0.017385830 0.018750643  
TRUE 0.509419790 0.478328939 0.488551902 0.416748311 0.399621339 0.373671120  
NA 0.031361934 0.042164947 0.036636934 0.044386638 0.041523585 0.053164916  
TRUE 0.023412248 0.015591973 0.019910379 0.026775816 0.022142209 0.020289974  
NA 0.026094147 0.037872135 0.024122192 0.022161353 0.026144542 0.033337361  
NA 0.063292108 0.070150670 0.053348051 0.066949603 0.066184595 0.065733021  
NA 0.842673074 0.872657134 0.789295574 0.795260814 0.770623966 0.801176337  
NA 0.055937681 0.061852281 0.051891113 0.059163119 0.062402514 0.076815923  
NA 0.171407751 0.158270208 0.138200546 0.137954857 0.114193769 0.176377508  
NA 0.034125094 0.041234099 0.028848051 0.032845677 0.033249828 0.031219000  
NA 0.021580546 0.021190518 0.022967509 0.018994527 0.021179762 0.028554906  
NA 0.037746194 0.030981758 0.021996425 0.024224782 0.023157617 0.029391807  
NA 0.103560754 0.067677994 0.078600220 0.095916827 0.070909453 0.071946887  
NA 0.029033368 0.017459763 0.021932392 0.020541277 0.021499312 0.023431485  
NA 0.385362929 0.404682581 0.376615983 0.410091170 0.406083166 0.375672441  
NA 0.015068528 0.013819826 0.013903785 0.013174560 0.018329639 0.015588960  
NA 0.025088239 0.026132778 0.023794539 0.025962203 0.021010854 0.042751669  
NA 0.044879592 0.046145224 0.041395606 0.044457896 0.046245515 0.058884337  
NA 0.034849819 0.034298405 0.047841988 0.032570960 0.031945072 0.067216868  
NA 0.019140526 0.028748491 0.022933826 0.021238141 0.017224424 0.022493516  
NA 0.026869772 0.025925727 0.020305578 0.030516559 0.018195786 0.028866812  
NA 0.040416137 0.036844197 0.037412738 0.032965090 0.028055689 0.048336325  
NA 0.026671684 0.023615458 0.021080155 0.013419342 0.019961361 0.025080785  
NA 0.097785833 0.072350490 0.056517258 0.102594308 0.090219857 0.080909495  
NA 0.046828952 0.052015069 0.028666251 0.065245336 0.074787795 0.056558911  
NA 0.401086714 0.465435345 0.386386251 0.430065106 0.504251985 0.439277813  
NA 0.089385404 0.088924270 0.067834009 0.084712757 0.104919353 0.095087333  
NA 0.028256342 0.024011968 0.021902183 0.017270300 0.027894399 0.030158899  
NA 0.063958849 0.042668034 0.060805317 0.045281916 0.036138348 0.053507842  
NA 0.016673410 0.021550791 0.016287988 0.014841390 0.018568946 0.020450056  
TRUE 0.400673132 0.443843384 0.384516553 0.375261227 0.405129130 0.346448077  
NA 0.022982151 0.017887288 0.019930898 0.022626989 0.024507128 0.022679865  
NA 0.157574968 0.242704381 0.188550055 0.165696695 0.190186599 0.196584410  
NA 0.029786126 0.021477580 0.025487568 0.024750865 0.026170617 0.028693265  
NA 0.053294347 0.046631059 0.046106822 0.040398416 0.056205762 0.065381120  
NA 0.027445462 0.034410782 0.023829554 0.023970624 0.025561083 0.031552169  
NA 0.093562963 0.089700285 0.105247857 0.057460504 0.064575047 0.158120225  
NA 0.063058291 0.049078830 0.045908421 0.053495220 0.067518378 0.053297406  
NA 0.022242093 0.018450715 0.018933249 0.017334064 0.019166076 0.019006125  
NA 0.043189409 0.044074267 0.043358320 0.033522096 0.030886189 0.042260647  
NA 0.030238443 0.045542865 0.031034257 0.031974156 0.038002983 0.028879298  
NA 0.638083357 0.647212671 0.595236726 0.578060111 0.601351552 0.558540560

NA 0.093179685 0.095265976 0.083083256 0.094597152 0.102429347 0.096403359  
NA 0.037798551 0.037646691 0.042662630 0.044864373 0.041779017 0.054889593  
NA 0.026689630 0.022177683 0.024157108 0.018296996 0.023104302 0.028817873  
NA 0.027787452 0.030662213 0.025677973 0.021345460 0.023903847 0.039478028  
NA 0.039728258 0.042284131 0.036683812 0.053418351 0.031715204 0.063905558  
NA 0.039460736 0.035645104 0.040234056 0.054315019 0.040182138 0.060250361  
NA 0.026055849 0.025820753 0.039735742 0.025099255 0.019850583 0.036335284  
NA 0.045192164 0.047677372 0.069900889 0.052712461 0.040455922 0.082829233  
NA 0.028214206 0.023818542 0.023292360 0.029811053 0.023189594 0.034224712  
NA 0.048448338 0.034939511 0.042808169 0.043322745 0.039178010 0.045682754  
TRUE 0.043339326 0.035362908 0.030142962 0.031224746 0.034634598 0.037878573  
TRUE 0.031200952 0.037508725 0.034295799 0.027812165 0.028168767 0.055160631  
NA 0.030832196 0.032090595 0.032167097 0.028750621 0.030678884 0.045280985  
NA 0.028583565 0.033012624 0.025487035 0.024896996 0.032365474 0.024437091  
NA 0.031866185 0.040573607 0.040120706 0.026819261 0.028283587 0.038750851  
NA 0.017537858 0.023093953 0.018749948 0.018384270 0.017689297 0.024965157  
NA 0.031361806 0.031578938 0.031917832 0.022371222 0.026565010 0.029317143  
NA 0.034624401 0.038453676 0.054494511 0.041681903 0.037604691 0.055270424  
NA 0.025675326 0.030567636 0.030681384 0.023899305 0.034222407 0.045746549  
NA 0.025295129 0.021710760 0.023522354 0.019919439 0.024878860 0.027526565  
NA 0.106265610 0.113577671 0.088734572 0.077072751 0.085875036 0.075320302  
NA 0.551293945 0.653411026 0.587409203 0.522325469 0.502423134 0.516713343  
NA 0.064505403 0.060538896 0.051394187 0.054986973 0.045676302 0.044587429  
NA 0.189570037 0.190066618 0.160113597 0.190044905 0.257361196 0.196241357  
NA 0.066423241 0.052984052 0.057806118 0.054357499 0.054566375 0.078917508  
NA 0.021297706 0.029540478 0.028866416 0.025242648 0.018644274 0.024754684  
NA 0.037263005 0.029806156 0.024822093 0.024111424 0.033414638 0.030949752  
NA 0.229319017 0.256302642 0.206360833 0.192929143 0.177623946 0.181564214  
NA 0.047805600 0.037757102 0.033351001 0.035666460 0.035138948 0.041291636  
NA 0.042407029 0.041988991 0.040380100 0.032202805 0.023451930 0.034010493  
NA 0.667326967 0.695108422 0.692977470 0.667980825 0.730920900 0.715540708  
NA 0.026599104 0.026403930 0.029076953 0.022137217 0.024585293 0.039020841  
NA 0.666779291 0.680717114 0.662359404 0.624177523 0.660238659 0.623401756  
NA 0.035871884 0.036380057 0.039133284 0.038144417 0.033359697 0.037542911  
NA 0.046219166 0.058300607 0.047808717 0.042481604 0.043127043 0.065549353  
NA 0.038927829 0.032592036 0.037721218 0.046564609 0.039781999 0.041738564  
NA 0.135495330 0.159241150 0.127032131 0.113772846 0.105265392 0.107544330  
NA 0.816808093 0.804047441 0.788104761 0.770365038 0.793704716 0.770058858  
NA 0.021532383 0.020638877 0.018566978 0.019642942 0.020182027 0.023779489  
NA 0.025046407 0.023171965 0.016123732 0.018366798 0.019082459 0.023673274  
NA 0.693784680 0.647001563 0.629210515 0.506130041 0.552038577 0.493172478  
NA 0.046436228 0.030480493 0.044291554 0.031749270 0.042695439 0.052074486  
NA 0.365777390 0.395306390 0.325086634 0.340831105 0.324882967 0.356512842  
NA 0.030231906 0.034002206 0.028389134 0.032351852 0.027104976 0.038322080

NA 0.033899614 0.030576481 0.030760095 0.024416908 0.026861791 0.040826794  
NA 0.397894754 0.416935301 0.354901396 0.360633029 0.420706747 0.435437609  
NA 0.038004597 0.036642899 0.037284612 0.037112181 0.032169375 0.045521624  
NA 0.079897174 0.096553099 0.079230889 0.060875285 0.050801524 0.105732555  
NA 0.025777480 0.022201848 0.017858005 0.017567097 0.015272562 0.022648331  
NA 0.045624274 0.046637631 0.035531042 0.040097720 0.035292845 0.064852234  
NA 0.021771197 0.034860976 0.028198807 0.024197983 0.020578176 0.025695309  
NA 0.023173106 0.022838596 0.019345077 0.021968207 0.016860826 0.030577350  
NA 0.026284036 0.031029779 0.028742665 0.025363065 0.022257590 0.043482208  
NA 0.020093736 0.022146739 0.025576822 0.028908285 0.016828302 0.025402843  
NA 0.037937794 0.033364490 0.028758577 0.041986627 0.029035104 0.035377274  
NA 0.879590088 0.884792970 0.856561811 0.841191859 0.885830896 0.844254774  
NA 0.041471161 0.042335334 0.043430593 0.024060075 0.024650082 0.031179468  
NA 0.037298690 0.038161823 0.030108804 0.031154266 0.031660860 0.037108745  
NA 0.028815128 0.021900097 0.023193718 0.022873944 0.022276185 0.031961663  
NA 0.193199997 0.224097235 0.178700188 0.188376656 0.182863560 0.227176259  
NA 0.032727544 0.035198414 0.030154661 0.032931340 0.028232555 0.045775377  
NA 0.054196788 0.067607162 0.047562652 0.048054772 0.033892220 0.044001757  
NA 0.031408181 0.035829952 0.029824339 0.024849682 0.025737833 0.022206303  
NA 0.035874969 0.038251900 0.026222557 0.022989183 0.030249728 0.041303337  
NA 0.061347150 0.062602058 0.053634512 0.059185599 0.054528995 0.074019167  
NA 0.047013113 0.063467954 0.044882439 0.052741476 0.053587311 0.074511412  
NA 0.380576473 0.389244844 0.311927389 0.301518815 0.336918846 0.290598403  
NA 0.060531128 0.064524560 0.055073770 0.057163769 0.058048365 0.076257475  
NA 0.148419124 0.177505754 0.189574869 0.209314886 0.150861970 0.174878834  
NA 0.030462196 0.027915642 0.022465377 0.024805732 0.018652602 0.034050546  
NA 0.023024216 0.029313263 0.029925139 0.021097640 0.029536889 0.028093019  
NA 0.091015351 0.088690025 0.100453581 0.056473897 0.094179718 0.067804927  
NA 0.022659559 0.020677831 0.027432003 0.029507219 0.023303781 0.029395388  
TRUE 0.030328024 0.026348078 0.026471244 0.027844159 0.026762530 0.031910242  
NA 0.016255215 0.013652247 0.011953992 0.012927212 0.015256391 0.017623631  
NA 0.039965341 0.030363567 0.030330166 0.024390670 0.034446967 0.027369782  
NA 0.029269914 0.030120909 0.028728070 0.027451099 0.027178312 0.029445597  
NA 0.034018917 0.019726355 0.015902364 0.019565475 0.019006661 0.028542755  
NA 0.455772550 0.448994658 0.414699413 0.475854192 0.513157114 0.378425231  
NA 0.032180744 0.028432570 0.030148775 0.027975746 0.025851498 0.037141451  
NA 0.027117704 0.025236573 0.022394045 0.026438159 0.021470258 0.036227618  
NA 0.023716456 0.025415676 0.023127922 0.020116049 0.021988720 0.039176878  
NA 0.330323983 0.295271582 0.309298670 0.396307172 0.389354596 0.309018874  
NA 0.027782242 0.016928192 0.017593083 0.021229843 0.024566521 0.025797622  
NA 0.027513338 0.018275248 0.019085640 0.021327418 0.020050709 0.023801563  
NA 0.139030273 0.157068008 0.142218367 0.093613911 0.117002428 0.149209624  
NA 0.037806060 0.037544227 0.037185150 0.033025994 0.030845058 0.041602364  
NA 0.050316504 0.051317441 0.047893452 0.046122549 0.043962294 0.074056682

NA 0.021040350 0.023238602 0.016375254 0.018166256 0.015306715 0.019848841  
NA 0.018929655 0.017017517 0.014453642 0.015639908 0.015771488 0.028112054  
NA 0.146505678 0.140154759 0.105856758 0.092551198 0.083817582 0.094954844  
NA 0.039709955 0.032033516 0.023915408 0.031145710 0.028576213 0.034877084  
NA 0.262162569 0.344000241 0.227333207 0.268932857 0.248636587 0.303801207  
NA 0.094795660 0.087467087 0.081711855 0.101540821 0.108205234 0.074956563  
NA 0.052675506 0.064028281 0.046304891 0.057432558 0.045917714 0.077900497  
NA 0.081286186 0.088340378 0.082301517 0.111886671 0.107593280 0.099581605  
TRUE 0.246276827 0.283354931 0.203257575 0.235682141 0.240753751 0.258597701  
NA 0.086194516 0.083074217 0.050858286 0.038246410 0.028839687 0.060438133  
NA 0.167160914 0.201724093 0.150945658 0.157404552 0.122809505 0.170123806  
NA 0.024011333 0.019823322 0.031058217 0.022389170 0.020411232 0.045087717  
NA 0.226202694 0.315890772 0.237768600 0.224574594 0.241399902 0.249794244  
NA 0.031914438 0.020228994 0.024520758 0.033324055 0.022365986 0.035276761  
NA 0.059641276 0.054838836 0.053271996 0.056661238 0.050671527 0.065433971  
NA 0.588958725 0.673830032 0.615804605 0.581830164 0.583888689 0.584348549  
NA 0.017601153 0.021612175 0.017229397 0.015139583 0.018643715 0.021813112  
NA 0.038117400 0.036107701 0.033799167 0.029252123 0.036627587 0.034996900  
NA 0.017777390 0.019823577 0.014612273 0.015350735 0.016607144 0.019548987  
NA 0.768048159 0.516763673 0.781755502 0.748576725 0.732319125 0.601830636  
NA 0.069484688 0.075111769 0.053364194 0.063152737 0.059117322 0.066732425  
NA 0.038174998 0.034605591 0.037787268 0.033735802 0.040503077 0.032733823  
NA 0.039003584 0.041793643 0.041216706 0.037961441 0.037299782 0.038277236  
NA 0.061190858 0.063473997 0.048194818 0.042100646 0.054472056 0.061661800  
NA 0.362635902 0.353460369 0.302631673 0.298330853 0.390092796 0.323036933  
NA 0.041330186 0.043610271 0.030838992 0.040672452 0.028923743 0.045650698  
NA 0.033711829 0.047676061 0.036150015 0.040502468 0.037177189 0.047838252  
NA 0.797515478 0.428855900 0.771861324 0.670486135 0.712812043 0.379877583  
NA 0.846916689 0.865131970 0.816960827 0.765260532 0.801214360 0.848044177  
TRUE 0.024054503 0.023874947 0.034887776 0.027881358 0.027346138 0.028194227  
NA 0.073788546 0.044116310 0.060332928 0.081814433 0.110684315 0.061342749  
NA 0.123592094 0.112235610 0.123287714 0.161717152 0.103603119 0.131841696  
NA 0.393396520 0.415855097 0.361197492 0.367036603 0.357847315 0.379076812  
NA 0.052206004 0.056752638 0.038496513 0.059930608 0.036130565 0.049941363  
NA 0.709556242 0.730289240 0.631868212 0.652971155 0.757527948 0.753212321  
TRUE 0.026430116 0.035775260 0.027717728 0.024425596 0.026474249 0.039026081  
NA 0.055901340 0.052843733 0.054475343 0.054933314 0.053351940 0.055899298  
NA 0.061398248 0.064708508 0.053099446 0.049491852 0.059106030 0.063328404  
NA 0.679864211 0.720727591 0.656116392 0.665915883 0.645775350 0.562981426  
NA 0.060809677 0.052911305 0.080330002 0.059929520 0.068977549 0.066579493  
TRUE 0.032303597 0.046965978 0.034681135 0.033200078 0.027755128 0.039424452  
NA 0.046291912 0.051901053 0.040951667 0.066803970 0.056213547 0.056222834  
NA 0.031181261 0.020423086 0.022903695 0.019704313 0.024577610 0.025641321  
TRUE 0.707979130 0.739964505 0.712829890 0.673310380 0.736914480 0.640411323

NA 0.283213151 0.187914179 0.347678533 0.146025358 0.128724278 0.201319070  
NA 0.042583141 0.061694349 0.069041024 0.058753093 0.060224154 0.057868245  
NA 0.127081378 0.146271556 0.118807535 0.103566413 0.104949507 0.123878821  
NA 0.054824055 0.041437265 0.042987463 0.045886776 0.037097450 0.047387106  
NA 0.337832473 0.423247068 0.370383435 0.263324512 0.374736263 0.273106737  
NA 0.556584331 0.583602155 0.564880548 0.540493873 0.578224702 0.579128913  
NA 0.048788474 0.054906607 0.048899626 0.043662069 0.033512900 0.076852229  
TRUE 0.757838717 0.731057063 0.765757220 0.748180995 0.822594584 0.753971338  
NA 0.033755287 0.040485406 0.032263540 0.028542350 0.031989990 0.044641141  
NA 0.119023094 0.140131672 0.107864821 0.119754493 0.123997139 0.132264846  
NA 0.026553549 0.038768445 0.031327831 0.025847622 0.021015215 0.038789818  
NA 0.640438309 0.608914399 0.599052077 0.466600775 0.570652869 0.430950058  
NA 0.036714729 0.029554154 0.036885177 0.029040620 0.035105120 0.045233099  
NA 0.025777946 0.029357272 0.026008613 0.022824896 0.020001978 0.030150711  
NA 0.015439369 0.014009081 0.017268491 0.017400038 0.018144544 0.022403792  
NA 0.763241562 0.804200037 0.776685986 0.754931399 0.813133682 0.693345357  
NA 0.014666600 0.011959736 0.010884427 0.010945501 0.010112724 0.015262892  
NA 0.291949418 0.280508932 0.263286271 0.254957258 0.236099078 0.302340845  
TRUE 0.738873058 0.796005660 0.682992781 0.688695389 0.768264255 0.730058658  
TRUE 0.042162584 0.029764190 0.036855682 0.046246126 0.023982146 0.038655981  
NA 0.210977436 0.173969040 0.192697561 0.162437730 0.312352360 0.176670579  
NA 0.030742799 0.024968259 0.026240221 0.028914150 0.021874029 0.035937656  
NA 0.019533271 0.014193625 0.013966130 0.013179219 0.014514959 0.019136160  
NA 0.072722914 0.061925409 0.058085127 0.045339488 0.069611139 0.068162523  
NA 0.051404236 0.042279731 0.044322943 0.051884114 0.038507779 0.049385879  
NA 0.047582682 0.082988388 0.085445800 0.048840883 0.082468512 0.080977322  
NA 0.833277476 0.836849116 0.780345639 0.784456128 0.874656867 0.790188647  
NA 0.018049824 0.018619028 0.019019441 0.015315675 0.017145653 0.022950972  
TRUE 0.265437226 0.197038581 0.411314600 0.356621571 0.370022727 0.247539922  
NA 0.054124061 0.061787263 0.045292362 0.046616551 0.057363446 0.058679869  
NA 0.080047799 0.083905551 0.071151009 0.078138113 0.061658678 0.084061122  
NA 0.052745986 0.058701492 0.059590883 0.045391662 0.059836847 0.061611034  
NA 0.026323750 0.032270621 0.022438747 0.026514592 0.020447404 0.036514480  
NA 0.045465264 0.046785412 0.036373089 0.042344832 0.038273382 0.049843862  
NA 0.043810781 0.046047949 0.036945248 0.043692072 0.041604433 0.048485276  
NA 0.642649910 0.794153461 0.676764411 0.683290699 0.643231732 0.728464221  
NA 0.032417164 0.033406579 0.031685432 0.031073111 0.037975000 0.045469504  
NA 0.195530767 0.157975524 0.174792724 0.106539577 0.104743403 0.126565244  
NA 0.039807322 0.038681883 0.055724512 0.042874306 0.044215509 0.066356783  
NA 0.049055785 0.045233675 0.044852416 0.048706692 0.055069775 0.040046034  
NA 0.025118778 0.011761268 0.021123898 0.023622760 0.022387394 0.023782257  
NA 0.342244686 0.373120160 0.279099764 0.283448291 0.331527162 0.300091595  
TRUE 0.029220920 0.028065824 0.024520861 0.026547429 0.028824987 0.030225200  
NA 0.027163986 0.031070525 0.020222374 0.020451330 0.022637479 0.030799736



NA 0.025092437 0.030328329 0.019214234 0.021113058 0.021281043 0.029465126  
TRUE 0.120189090 0.145833604 0.111342368 0.110951946 0.104095937 0.111676629  
NA 0.497735421 0.515140873 0.510079027 0.463730553 0.492161267 0.508843448  
NA 0.016404973 0.018811708 0.014818849 0.015007258 0.016338901 0.018748111  
TRUE 0.460057255 0.507110114 0.396096322 0.413885695 0.453587268 0.451935797  
NA 0.031880057 0.023336025 0.022490028 0.024678889 0.025577882 0.037017830  
NA 0.066756397 0.058258928 0.048336315 0.048633299 0.050845055 0.067673771  
NA 0.038709316 0.038021185 0.032647574 0.035090126 0.034373034 0.053375819  
NA 0.439838994 0.447479596 0.363752383 0.331346349 0.400110237 0.333916147  
NA 0.046258637 0.042965681 0.034904398 0.040888503 0.048536072 0.045598643  
NA 0.055882849 0.052039144 0.057377083 0.054082814 0.053807429 0.059754833  
NA 0.018458398 0.019149649 0.019418331 0.026475600 0.027810226 0.027192725  
NA 0.288446824 0.317946555 0.259781521 0.261460987 0.346852793 0.284360905  
NA 0.024743628 0.023090174 0.022641753 0.028832093 0.019918102 0.036048291  
NA 0.061570487 0.061949305 0.053774202 0.049169092 0.058827295 0.084009323  
NA 0.315545459 0.337638594 0.294684315 0.316978140 0.293063046 0.307406468  
NA 0.020525571 0.018930980 0.018656388 0.023222690 0.016515434 0.022601130  
NA 0.096217527 0.117560831 0.136475424 0.133921486 0.123713938 0.139500325  
NA 0.020274101 0.013198154 0.018092035 0.015422081 0.018791969 0.028244858  
NA 0.031950264 0.040740199 0.034572336 0.028247227 0.034333061 0.042137817  
NA 0.046908054 0.050622748 0.040179725 0.046718152 0.049822994 0.062373346  
NA 0.064070426 0.054343363 0.059364621 0.062727323 0.058793871 0.080006183  
NA 0.037199144 0.027998164 0.031941520 0.022705286 0.026814042 0.041507936  
NA 0.323023196 0.340821944 0.328633541 0.405800024 0.520570950 0.401039262  
NA 0.043713208 0.057094936 0.044043307 0.049997713 0.041869010 0.050873099  
NA 0.750141447 0.769316327 0.784885763 0.692305810 0.751575619 0.754057067  
NA 0.064795051 0.036215053 0.053985378 0.044116606 0.052087011 0.052721688  
TRUE 0.033185800 0.031811641 0.037541008 0.031229681 0.032018391 0.059734362  
NA 0.389846394 0.378102448 0.354883991 0.322067676 0.319944276 0.296782676  
NA 0.130498803 0.096970775 0.112554865 0.107117525 0.088399671 0.168540886  
NA 0.050283561 0.040494602 0.042573906 0.037566763 0.043042657 0.050314880  
NA 0.019793374 0.019062973 0.018829514 0.026803577 0.029024868 0.026565610  
TRUE 0.047090486 0.040163661 0.042411288 0.045455739 0.046863764 0.040649271  
NA 0.030100103 0.036435231 0.020717938 0.035489967 0.030216956 0.039274983  
NA 0.053242924 0.053205956 0.041448200 0.043881457 0.035701271 0.045976611  
NA 0.062613352 0.069515222 0.047323600 0.051321994 0.046712668 0.058904168  
NA 0.040713176 0.031585941 0.030556037 0.038304188 0.038239116 0.039154667  
NA 0.030613124 0.022648196 0.020838082 0.017645539 0.019288758 0.025726288  
NA 0.175228456 0.162562096 0.138190117 0.132659598 0.154117952 0.159800316  
NA 0.027159358 0.023542942 0.022900824 0.028202752 0.031962047 0.029416317  
NA 0.135665166 0.095510968 0.114646659 0.109681456 0.124082690 0.106598788  
NA 0.020012434 0.035575812 0.026445522 0.019859154 0.029322519 0.024225788  
NA 0.036290902 0.024947035 0.023728551 0.032813701 0.025296345 0.030744577  
NA 0.019144480 0.022260689 0.019316880 0.024203923 0.018253191 0.024605306

NA 0.021086681 0.017242831 0.021266851 0.026244761 0.018615587 0.027639393  
NA 0.030485167 0.022681706 0.028054777 0.027723982 0.029785128 0.031091072  
NA 0.032714117 0.034167829 0.023190861 0.040873148 0.031013448 0.031296579  
NA 0.031005161 0.042720075 0.033033834 0.032567612 0.029127683 0.043324777  
NA 0.379208432 0.349424894 0.321446881 0.346426758 0.451919277 0.373870371  
NA 0.033783911 0.039201048 0.030320623 0.030689547 0.028744929 0.038044426  
NA 0.083468986 0.073573330 0.068819409 0.046030140 0.048596075 0.111195981  
NA 0.043890049 0.048973775 0.039634563 0.041625811 0.035448600 0.055745604  
NA 0.037420522 0.037798613 0.035890310 0.037509398 0.028419304 0.046421035  
TRUE 0.737716799 0.755371074 0.690173396 0.709373090 0.708185962 0.739438468  
NA 0.486362832 0.490889403 0.430681638 0.520266301 0.524886901 0.397346423  
NA 0.024647695 0.028388179 0.017966191 0.024723601 0.020456195 0.033892164  
NA 0.043381009 0.035212510 0.040123442 0.043232631 0.035584526 0.039738152  
NA 0.295531693 0.294528594 0.258309067 0.270860045 0.275752564 0.259565219  
NA 0.048977197 0.047945140 0.037702419 0.046441615 0.053008015 0.056601723  
NA 0.207977116 0.195161776 0.134893253 0.175152611 0.196360882 0.204303674  
NA 0.023028966 0.026867877 0.025725848 0.029369351 0.028408746 0.037859638  
NA 0.032117241 0.020180255 0.021234363 0.023688120 0.026115680 0.035635355  
NA 0.077706612 0.098541013 0.056364215 0.067635910 0.063034303 0.085452341  
NA 0.020923090 0.019470971 0.016902435 0.024739885 0.022910083 0.025054850  
NA 0.270185959 0.314069061 0.214080766 0.246232759 0.249199872 0.217452560  
NA 0.055837689 0.063064289 0.047741436 0.050418966 0.052995753 0.069465106  
NA 0.031655072 0.039945177 0.022468738 0.027923070 0.028459227 0.051111085  
NA 0.024631497 0.017066501 0.021428248 0.021468319 0.021668908 0.025286066  
NA 0.071646052 0.086197604 0.074939212 0.092245672 0.095001972 0.095245802  
TRUE 0.420863561 0.424084432 0.327893889 0.436478172 0.325736770 0.346523539  
NA 0.033450500 0.033548303 0.024361677 0.032931066 0.028890817 0.040464020  
NA 0.017807542 0.020814334 0.015206277 0.013990044 0.014786748 0.017661108  
NA 0.773203223 0.808425166 0.759249624 0.720330825 0.734673252 0.796721224  
NA 0.028603946 0.023648049 0.020941987 0.021245689 0.017492774 0.023781268  
NA 0.041152489 0.034740366 0.039501819 0.033002564 0.035793135 0.051779750  
NA 0.012887638 0.010389390 0.013353540 0.015318517 0.010916126 0.018152241  
NA 0.079742525 0.042707040 0.057377605 0.038050873 0.038654218 0.044639236  
NA 0.026169748 0.024722755 0.038562883 0.045800077 0.027747743 0.042080735  
NA 0.032214202 0.031686247 0.030755965 0.032334941 0.032799435 0.043398867  
NA 0.049514542 0.050982660 0.042425106 0.053194095 0.049191396 0.055951060  
NA 0.262479812 0.295611176 0.245943364 0.269359803 0.239141535 0.264360758  
NA 0.037572078 0.044822044 0.028829225 0.038712916 0.034112524 0.039791909  
NA 0.041480381 0.039024737 0.038938883 0.041461065 0.037962226 0.049770005  
NA 0.859453567 0.906258276 0.815498841 0.835643802 0.843137341 0.827528008  
NA 0.411153123 0.361363362 0.372452402 0.327159376 0.328595957 0.326293476  
NA 0.022390378 0.024653716 0.023667194 0.021152869 0.023431547 0.035451093  
NA 0.025143847 0.027170213 0.026721403 0.020508177 0.019355080 0.032092009  
NA 0.029360410 0.025826613 0.019537358 0.019350897 0.027861086 0.025659419

NA 0.018730213 0.013456099 0.014302815 0.019449941 0.020480166 0.017495867  
NA 0.718761712 0.763539927 0.732147790 0.720100531 0.755122761 0.711748134  
NA 0.036083572 0.035446644 0.030542873 0.028172303 0.031548874 0.042568168  
NA 0.500277328 0.529434453 0.452722834 0.441909877 0.397124998 0.455298373  
NA 0.395538217 0.384455183 0.400495135 0.281895721 0.366805259 0.352002817  
NA 0.316824966 0.335811537 0.294533699 0.309572869 0.308164812 0.307984725  
NA 0.036435432 0.036970087 0.030564847 0.037335612 0.029669967 0.043262510  
NA 0.030929551 0.034947541 0.031627084 0.032823450 0.025500996 0.032310206  
NA 0.219848468 0.243183369 0.201397905 0.245380713 0.323897348 0.341376778  
NA 0.282097160 0.256600740 0.304349015 0.319892354 0.310559286 0.222638937  
NA 0.793646886 0.854205895 0.831231398 0.804493567 0.826989351 0.858473965  
NA 0.214175463 0.240226768 0.165196796 0.191528695 0.189735491 0.224452436  
NA 0.395448180 0.376241215 0.366176060 0.287303978 0.428170298 0.329685072  
NA 0.058752962 0.084422849 0.098747262 0.053129417 0.080059388 0.103429560  
NA 0.355776411 0.381804637 0.314672339 0.319219010 0.355204897 0.358038958  
NA 0.032654924 0.021805012 0.023132985 0.023752738 0.022531022 0.024069977  
NA 0.023525412 0.022001975 0.022928010 0.016714941 0.019346593 0.025931841  
NA 0.095091679 0.078743298 0.080017604 0.100688866 0.183589118 0.112115990  
NA 0.038021525 0.023488232 0.030228028 0.029243905 0.025524361 0.038528273  
NA 0.609277832 0.551846219 0.545232308 0.536055141 0.572487560 0.522476897  
NA 0.045911274 0.032870606 0.039991867 0.042968670 0.032845117 0.064185399  
TRUE 0.602243513 0.667561522 0.623346946 0.594019560 0.593809402 0.646832691  
NA 0.032893452 0.034456293 0.027579896 0.026638019 0.032189901 0.038251407  
NA 0.031596180 0.021738155 0.017903593 0.022849153 0.024821595 0.028108613  
NA 0.042567785 0.053265825 0.058901383 0.059476706 0.040495636 0.070880526  
NA 0.552953957 0.614897710 0.556210660 0.526018833 0.676478809 0.483533242  
NA 0.099862295 0.103754130 0.089034325 0.091617725 0.111705992 0.112743618  
NA 0.020330951 0.015700118 0.019223132 0.014040038 0.011333777 0.021787004  
NA 0.257257722 0.265936350 0.203468851 0.226988953 0.255473058 0.231895903  
TRUE 0.237253320 0.310310694 0.286027400 0.258554663 0.249451888 0.232811097  
NA 0.043305294 0.038818337 0.028859832 0.034507370 0.030134171 0.053154217  
NA 0.091883818 0.081192989 0.081692548 0.064145392 0.082321456 0.081332641  
NA 0.022258676 0.024116477 0.015881417 0.017234580 0.020676958 0.026995459  
NA 0.027765020 0.026160599 0.025063990 0.023668748 0.023860162 0.027117193  
NA 0.040093490 0.038224757 0.035274423 0.038049560 0.042791555 0.044622103  
NA 0.266618003 0.260169603 0.271228063 0.249921846 0.234376213 0.218375703  
NA 0.029157876 0.040128641 0.034988254 0.037513326 0.035041900 0.052203966  
NA 0.026673075 0.024547279 0.024894560 0.024069924 0.034911654 0.028294551  
NA 0.811240053 0.819763523 0.755006055 0.697188542 0.724094149 0.730875429  
NA 0.018968169 0.018764743 0.016535900 0.016382624 0.017325474 0.025110420  
TRUE 0.025564922 0.029742856 0.022310474 0.021957245 0.020925767 0.027973605  
NA 0.035883445 0.031740165 0.023997495 0.030417497 0.026064210 0.038905938  
NA 0.031776230 0.034482677 0.032911453 0.030905170 0.037030357 0.042661487  
TRUE 0.039812940 0.028700992 0.029364336 0.027115619 0.029518750 0.043548840

NA 0.757550995 0.740364752 0.629586274 0.781053499 0.819192342 0.768715856  
NA 0.031452717 0.035696843 0.026355912 0.045850796 0.033322511 0.039569554  
NA 0.037167170 0.023503394 0.026676679 0.028234282 0.029641802 0.036060535  
TRUE 0.324341730 0.350327850 0.294015180 0.264451135 0.321540935 0.311301595  
NA 0.762119621 0.821214869 0.797347580 0.810619039 0.836673947 0.786560603  
TRUE 0.237248053 0.272891887 0.250096861 0.238298580 0.250039476 0.238360637  
NA 0.039030927 0.031894754 0.036943973 0.038680546 0.039885755 0.049141990  
NA 0.024716717 0.033074406 0.032162729 0.025550558 0.033135546 0.051354025  
TRUE 0.058683843 0.080164992 0.069153274 0.047010595 0.044318973 0.110956978  
NA 0.035468415 0.032935316 0.030709554 0.045170129 0.039713470 0.038620921  
NA 0.402023176 0.409308152 0.344062510 0.350022831 0.320781243 0.345711133  
NA 0.438011053 0.442123327 0.373090225 0.404491170 0.391421658 0.398655840  
NA 0.119200869 0.145402889 0.120100236 0.090403208 0.098515907 0.126704445  
NA 0.025803341 0.025762517 0.022851918 0.021973385 0.021742037 0.024712438  
NA 0.023733382 0.028502975 0.017186739 0.028820367 0.023884177 0.026774311  
NA 0.026229974 0.019446001 0.017034431 0.021130870 0.018748238 0.021015612  
NA 0.020446302 0.019931340 0.017783001 0.023191473 0.016252399 0.021239444  
NA 0.028828090 0.029773572 0.019266574 0.023118991 0.022840981 0.028139452  
NA 0.025919703 0.025919106 0.018268441 0.023512490 0.022592713 0.028723783  
NA 0.067339202 0.059439733 0.052959512 0.048444361 0.029216860 0.093066528  
NA 0.065832387 0.066984183 0.058064792 0.042562298 0.054481394 0.044502067  
NA 0.028311118 0.025752113 0.020817384 0.020143503 0.019453146 0.023102767  
NA 0.029363964 0.026813675 0.021504570 0.032028628 0.027157787 0.034114156  
NA 0.021711425 0.018826364 0.014243362 0.015054589 0.016264691 0.022825023  
NA 0.047328818 0.054038135 0.057265344 0.041524131 0.041874468 0.059621053  
NA 0.055707106 0.055370288 0.044461659 0.040504275 0.051818168 0.070100978  
NA 0.060911916 0.048841884 0.061911137 0.051969780 0.033316559 0.070863605  
NA 0.031872593 0.025049148 0.025496505 0.020977166 0.017470133 0.023370155  
NA 0.727547794 0.699015182 0.719229954 0.748961833 0.753087233 0.725513921  
NA 0.053443447 0.055557151 0.046907232 0.049885470 0.061069352 0.049820909  
TRUE 0.027507654 0.030791538 0.027408454 0.031279809 0.018879589 0.045122197  
NA 0.033809614 0.027939415 0.026122559 0.028637096 0.019315137 0.025745365  
TRUE 0.110278561 0.085336901 0.073969804 0.083300948 0.102528502 0.091020549  
NA 0.030630832 0.026255825 0.028177367 0.034531612 0.025415780 0.034321372  
NA 0.024956216 0.027976858 0.025601102 0.025991699 0.025606542 0.028693925  
NA 0.070569198 0.081258319 0.061667184 0.064619570 0.065903099 0.085074239  
NA 0.288148098 0.273673215 0.232266894 0.295108678 0.275770543 0.256351596  
TRUE 0.413713535 0.406399424 0.354968758 0.358042066 0.379602723 0.337504019  
NA 0.237678934 0.269687855 0.230093295 0.235908027 0.238846136 0.195762876  
NA 0.016192758 0.014247865 0.012809602 0.014820713 0.013411425 0.018174186  
NA 0.313799119 0.325829418 0.267966582 0.252734259 0.164417427 0.245623536  
NA 0.088735028 0.082150355 0.072228125 0.081409887 0.086595812 0.085761081  
NA 0.259942667 0.204421090 0.219091019 0.207278947 0.217628819 0.271603114  
NA 0.796094632 0.863174926 0.871209564 0.810698368 0.847517361 0.813429848

NA 0.645546910 0.667080313 0.603986235 0.594497056 0.613832235 0.584153999  
NA 0.035504052 0.027519108 0.027599747 0.027771523 0.038080164 0.034578704  
NA 0.027597947 0.019843739 0.028643675 0.017299217 0.021278675 0.029847376  
NA 0.520259915 0.532626814 0.397376093 0.488223142 0.540086355 0.579571509  
NA 0.027472450 0.028512585 0.023702227 0.027646392 0.028113211 0.030686006  
NA 0.625324620 0.656663378 0.669072367 0.524990007 0.572128389 0.693278120  
NA 0.106179277 0.131661981 0.141153790 0.092878145 0.083749758 0.156618278  
NA 0.897562752 0.918057250 0.877568410 0.873531534 0.883813613 0.860742694  
TRUE 0.491404741 0.489177855 0.459381741 0.358861929 0.393788943 0.371270622  
NA 0.553118622 0.583111489 0.500861364 0.491020910 0.537974189 0.484234553  
NA 0.234106537 0.210447851 0.227226990 0.231169723 0.203176175 0.225181276  
NA 0.612764017 0.660492618 0.671524081 0.564075190 0.651201072 0.591712477  
NA 0.040974484 0.025090475 0.029710346 0.024343749 0.024107696 0.035985086  
NA 0.024419300 0.028066423 0.020756086 0.020854873 0.030491313 0.026189160  
NA 0.895684432 0.913142643 0.891908568 0.888863623 0.888583232 0.868559120  
NA 0.043640792 0.037535669 0.039520122 0.038233173 0.045392867 0.049859281  
NA 0.031240812 0.030842329 0.029068532 0.031620843 0.038272034 0.042387424  
NA 0.301160436 0.368675344 0.290914413 0.312138422 0.381519693 0.326338324  
NA 0.030145574 0.035791759 0.023011874 0.026236552 0.030037973 0.033780995  
NA 0.035006511 0.041845366 0.032278062 0.043383760 0.038609867 0.039889881  
NA 0.314523045 0.350597715 0.257875854 0.263739948 0.266960491 0.259441015  
NA 0.198005322 0.368779357 0.250958347 0.264258130 0.198822136 0.193435725  
TRUE 0.047451022 0.049440495 0.044884500 0.041596926 0.037309707 0.079000896  
NA 0.032845341 0.034445583 0.024331472 0.024088090 0.022038715 0.039044671  
NA 0.014999042 0.012792059 0.014369433 0.013600967 0.016182940 0.018742433  
NA 0.023850225 0.017051968 0.017612414 0.019579626 0.019353213 0.022555862  
NA 0.029314320 0.016721175 0.026001618 0.019802564 0.021711749 0.036159571  
NA 0.033995854 0.035875213 0.030695889 0.022535443 0.025819951 0.023911323  
NA 0.863533964 0.891607867 0.835464111 0.866399432 0.918404005 0.881183155  
NA 0.021499955 0.021215222 0.026627265 0.024678463 0.023773317 0.028874672  
NA 0.903889549 0.910412695 0.877976236 0.902394062 0.887152453 0.880000015  
NA 0.827526282 0.881697790 0.824201913 0.786642103 0.833020709 0.806728797  
NA 0.270215581 0.309795000 0.248937190 0.248862767 0.207005223 0.236694820  
NA 0.070561084 0.075612134 0.067000138 0.066149437 0.062118586 0.106389169  
NA 0.247640320 0.278039889 0.203757727 0.199638383 0.183072201 0.193596449  
NA 0.526408207 0.492219002 0.498613364 0.458086843 0.439181286 0.392233849  
NA 0.048226686 0.040000226 0.046191921 0.048997349 0.045242048 0.057463823  
NA 0.110403166 0.114111298 0.103756416 0.109360156 0.096490764 0.114357069  
NA 0.804881488 0.912817431 0.824930492 0.800864948 0.883590420 0.873180785  
NA 0.325112036 0.327465858 0.296485059 0.213995574 0.336965674 0.255090807  
NA 0.020228619 0.023458693 0.015433374 0.017035576 0.017013217 0.026314094  
NA 0.039813312 0.027866892 0.031075813 0.038193836 0.028096572 0.039309588  
NA 0.016023011 0.012992369 0.018290957 0.017296117 0.022055599 0.018169399  
NA 0.445277098 0.491666372 0.458568368 0.437824038 0.458656995 0.547336201

NA 0.019485984 0.023813561 0.016914426 0.015991238 0.014725371 0.019048036  
NA 0.034162833 0.033098737 0.030892377 0.029772445 0.023250420 0.032759009  
TRUE 0.567369745 0.550122357 0.465567340 0.469802201 0.456683285 0.478984419  
TRUE 0.048171405 0.052559224 0.042497266 0.052590713 0.059878969 0.079267816  
NA 0.024455177 0.021104087 0.018203343 0.022830313 0.025364232 0.024630034  
NA 0.804157720 0.822024718 0.808187944 0.805755561 0.870557819 0.852320505  
TRUE 0.133077370 0.217018258 0.128757225 0.127683566 0.184883996 0.169879549  
NA 0.030279195 0.030455016 0.029913069 0.026506560 0.027946860 0.029343320  
NA 0.031005413 0.023042166 0.026354860 0.023534414 0.026409967 0.038340406  
NA 0.258390269 0.264323490 0.218695700 0.213774116 0.269616388 0.203589174  
NA 0.022544478 0.027637620 0.022864124 0.020404886 0.023824681 0.030127682  
NA 0.022471732 0.018887984 0.019042043 0.018167486 0.022627197 0.030898443  
NA 0.118033549 0.105875480 0.114944489 0.139686335 0.138044444 0.110234974  
NA 0.041413290 0.038818044 0.029223360 0.034711874 0.044598681 0.051298037  
NA 0.022290001 0.020387982 0.017025759 0.016795558 0.018547022 0.022897365  
NA 0.030979449 0.028535556 0.021831140 0.023350879 0.026790242 0.028329779  
NA 0.036167911 0.028869728 0.021705107 0.024958357 0.025121815 0.032009270  
NA 0.015787408 0.021109755 0.017179377 0.019952910 0.021055065 0.020592659  
NA 0.264526312 0.309796156 0.279654713 0.285585573 0.410236929 0.373854763  
NA 0.481737021 0.516308366 0.445466726 0.452412431 0.450902443 0.424286173  
NA 0.040386338 0.027252634 0.028948546 0.037115233 0.045425402 0.043293607  
NA 0.020625021 0.020973788 0.019415192 0.019517749 0.013681786 0.020126337  
NA 0.874835448 0.922727402 0.851207824 0.913585649 0.875670736 0.866196729  
NA 0.801396183 0.887051014 0.828763130 0.822148795 0.804171595 0.864299333  
NA 0.021956153 0.019961089 0.016483049 0.020498157 0.027330043 0.028990466  
NA 0.433007723 0.452948792 0.410810406 0.306226976 0.346647269 0.327463301  
NA 0.231003899 0.208281409 0.175342154 0.214270285 0.191550604 0.225653484  
NA 0.044907680 0.030659134 0.031191370 0.026959670 0.038593027 0.037293207  
NA 0.031820772 0.028364635 0.027765612 0.031377081 0.031398540 0.031609290  
NA 0.043277875 0.033055805 0.032263734 0.034096472 0.034459344 0.032397064  
TRUE 0.469406304 0.449685644 0.447980116 0.368018036 0.310287863 0.350486478  
TRUE 0.565319693 0.626238493 0.577167722 0.570581669 0.584600469 0.568408541  
NA 0.040117090 0.054441696 0.034289978 0.025686507 0.030144657 0.039790675  
TRUE 0.066066148 0.069500881 0.055479874 0.041067088 0.040368753 0.076092622  
NA 0.047014416 0.045733584 0.064686927 0.052465690 0.055809835 0.104309479  
NA 0.565818108 0.605741289 0.533637420 0.545857357 0.574385614 0.488143433  
NA 0.043078690 0.059994550 0.055186912 0.079138570 0.062256007 0.079051712  
NA 0.015751332 0.013848623 0.011040277 0.015843430 0.015609380 0.014382695  
NA 0.557629880 0.535423997 0.546275693 0.444900361 0.453206044 0.444629821  
NA 0.920462704 0.926573005 0.913460041 0.911829531 0.896989279 0.896237392  
NA 0.363887683 0.413158205 0.330090798 0.311511177 0.180963774 0.256563522  
NA 0.209007889 0.194426224 0.133246660 0.096402738 0.124351756 0.150696128  
NA 0.020806149 0.028606147 0.017228014 0.032409566 0.019729667 0.025810459  
NA 0.020289289 0.025408768 0.019292974 0.019967933 0.021239403 0.029666066

NA 0.092523803 0.108625161 0.080345606 0.079555865 0.098851872 0.085850101  
NA 0.056274708 0.053223943 0.040053674 0.052195426 0.031535911 0.062445322  
NA 0.028094931 0.025666896 0.019457672 0.021981257 0.023593264 0.025769161  
TRUE 0.116701659 0.117467404 0.085045242 0.094397214 0.094671888 0.101826825  
NA 0.716635960 0.705489162 0.748209696 0.747326439 0.821971995 0.788309172  
NA 0.026731587 0.040481024 0.032591696 0.031448172 0.026003530 0.042386542  
NA 0.034951523 0.031063848 0.027972129 0.023183909 0.027773714 0.033867980  
NA 0.148708341 0.117037748 0.091358259 0.103517364 0.072861380 0.072416758  
NA 0.022560408 0.019215596 0.022557950 0.020282238 0.017756768 0.027088651  
NA 0.906495777 0.899155608 0.890822844 0.872400769 0.899930617 0.870045367  
NA 0.015975083 0.016415922 0.021186217 0.018994938 0.020604593 0.028842873  
NA 0.030578362 0.024525814 0.027753077 0.027148578 0.028207241 0.052838515  
NA 0.019541783 0.017053052 0.018344173 0.019952697 0.019135130 0.026026778  
NA 0.871334217 0.867857572 0.829355586 0.845027053 0.813281995 0.755624260  
NA 0.606902300 0.690509134 0.524456681 0.566645620 0.658618544 0.697788893  
NA 0.022528269 0.017355050 0.012987759 0.017436025 0.022120344 0.020209795  
NA 0.079300653 0.077394054 0.058028261 0.083991912 0.117027667 0.072194663  
NA 0.047065246 0.049653294 0.031855546 0.042010843 0.029031952 0.043125185  
NA 0.776578938 0.895308517 0.872433180 0.880689243 0.895123948 0.860628314  
NA 0.019998528 0.027730276 0.020359130 0.020474930 0.020439491 0.026653229  
NA 0.119728848 0.116605091 0.093436214 0.100151154 0.177752093 0.154245450  
NA 0.018824335 0.027141985 0.023707272 0.034542736 0.027936833 0.022193787  
NA 0.034749743 0.034362764 0.026143542 0.022387432 0.040478257 0.041463182  
TRUE 0.461521431 0.460810758 0.393049873 0.458938570 0.457066415 0.451704146  
NA 0.055937996 0.056318672 0.048425924 0.054727033 0.056830998 0.047967972  
NA 0.329537815 0.322390039 0.287864325 0.286169799 0.327656851 0.285684876  
NA 0.045135678 0.040321674 0.031118553 0.042435730 0.035488811 0.040172575  
NA 0.038135699 0.033932279 0.026444716 0.034858711 0.036251506 0.038924265  
NA 0.463301557 0.491721449 0.453010325 0.537818525 0.560565110 0.545040016  
TRUE 0.017871027 0.015911904 0.012698854 0.014203913 0.013664674 0.023995349  
NA 0.448084281 0.523109920 0.397735384 0.385157433 0.387888184 0.492240436  
NA 0.584629691 0.593410768 0.496873587 0.513334846 0.539500350 0.499376296  
NA 0.028940808 0.040351824 0.032271303 0.033016034 0.034506568 0.037319329  
NA 0.035471357 0.027409952 0.031790519 0.030518012 0.025232877 0.043066180  
NA 0.029449363 0.040011858 0.029067326 0.028030422 0.026244717 0.039117581  
NA 0.016953228 0.023085579 0.021377301 0.016661539 0.017207355 0.025138354  
TRUE 0.041578645 0.062119536 0.056466344 0.067492023 0.055791937 0.067901335  
NA 0.034115005 0.040320353 0.021334183 0.033237895 0.042838921 0.036906237  
NA 0.024965677 0.034626675 0.022173648 0.025399833 0.023871557 0.038083883  
NA 0.047950560 0.028545505 0.026468715 0.026451036 0.032854094 0.038948616  
NA 0.055925582 0.054898742 0.049765281 0.053583162 0.053247143 0.059322320  
NA 0.044457619 0.038879633 0.042765750 0.043292281 0.038637729 0.083749383  
NA 0.031071654 0.030613328 0.031233894 0.032541376 0.030832872 0.043027008  
NA 0.217490594 0.262847470 0.207240524 0.227766615 0.247010122 0.240094198

NA 0.053956712 0.048003617 0.034177424 0.039453280 0.048647603 0.059450050  
NA 0.256666084 0.301079132 0.282953768 0.327779871 0.346998063 0.340292226  
NA 0.433431595 0.420109592 0.382026646 0.402117339 0.560989614 0.469639445  
NA 0.487574599 0.449745331 0.437961861 0.450520180 0.380551508 0.405364448  
NA 0.036671108 0.041227733 0.037171219 0.048370027 0.065338008 0.061900407  
NA 0.040418156 0.051927165 0.041280528 0.046308627 0.049797165 0.059900848  
NA 0.046930449 0.036087225 0.042169757 0.051209585 0.037907062 0.055632784  
NA 0.449707903 0.503212084 0.429170679 0.430295682 0.497002465 0.468044298  
NA 0.556799887 0.644808716 0.478700973 0.552145173 0.581631669 0.601993989  
NA 0.978361702 0.980001670 0.975778617 0.977080096 0.976634802 0.974409386  
NA 0.828446685 0.802962048 0.796798646 0.838690243 0.873817217 0.817064467  
NA 0.033213816 0.039669190 0.024724732 0.028275456 0.021117942 0.041491763  
NA 0.049135888 0.043998585 0.056614031 0.050538225 0.046254019 0.058384063  
NA 0.025080766 0.031031571 0.022689934 0.022377777 0.019654965 0.031021449  
NA 0.497669583 0.554195709 0.439563498 0.403313077 0.385791462 0.372708115  
NA 0.221652577 0.168932527 0.155744845 0.089285354 0.076346696 0.155624966  
NA 0.218930964 0.267696076 0.150826773 0.220024216 0.279861447 0.260027492  
NA 0.315575040 0.354258051 0.281476232 0.287234079 0.290036277 0.282912656  
TRUE 0.190184975 0.134034570 0.107168306 0.074156985 0.076689474 0.095229101  
NA 0.034320422 0.028315492 0.043023431 0.051254227 0.036074450 0.063784471  
NA 0.019127569 0.016063763 0.020042468 0.022118551 0.018716815 0.027713999  
NA 0.022179257 0.031953396 0.012710278 0.020396864 0.021238130 0.029486679  
NA 0.231167468 0.275699077 0.222871872 0.169850052 0.208827696 0.244463905  
NA 0.194958617 0.253294171 0.168630843 0.177630076 0.227782604 0.225077626  
NA 0.249293595 0.140851774 0.184982437 0.133887445 0.121997502 0.148326518  
NA 0.366228483 0.420493249 0.314040532 0.372067284 0.402152521 0.371120476  
TRUE 0.455665373 0.547299757 0.430328825 0.493181391 0.535074058 0.465634482  
NA 0.241062689 0.223738924 0.167570435 0.151673949 0.133401509 0.129569450  
NA 0.622490933 0.696599517 0.631590932 0.700445322 0.750580725 0.692609651  
NA 0.033163436 0.040572369 0.030227254 0.030403577 0.037530427 0.034526033  
NA 0.039964337 0.030280813 0.026056649 0.036832305 0.035012687 0.042811482  
NA 0.027654178 0.024344986 0.018875460 0.023956829 0.022819276 0.028958173  
NA 0.015618213 0.019190523 0.015257385 0.017144021 0.016333452 0.017982129  
NA 0.024698200 0.024142541 0.024248452 0.029715654 0.027422525 0.041348995  
NA 0.864899957 0.874198349 0.863036873 0.864441849 0.854309351 0.849362185  
NA 0.048017519 0.029903534 0.035238763 0.035255147 0.033832795 0.041458136  
NA 0.591139635 0.600822329 0.620103330 0.573010138 0.525196613 0.469496784  
NA 0.045183864 0.029121712 0.038310141 0.032218258 0.027458472 0.043935855  
NA 0.057041730 0.072660430 0.052523761 0.047680336 0.046555425 0.078715214  
NA 0.021792315 0.017165962 0.018869567 0.020590383 0.019016217 0.025484063  
NA 0.275091846 0.378809670 0.268865337 0.208350981 0.296049184 0.347665547  
NA 0.268418325 0.350866324 0.259074749 0.270693425 0.211220062 0.254656728  
NA 0.769383560 0.817593411 0.775782127 0.833905506 0.844840447 0.780481270  
NA 0.031599536 0.025809518 0.031782728 0.023342058 0.024115756 0.026421403



NA 0.044680595 0.059179646 0.053458438 0.042564536 0.033486000 0.068942301  
NA 0.036810453 0.042903400 0.037540246 0.032949391 0.040462586 0.050547812  
NA 0.020077581 0.021177782 0.020848297 0.016988897 0.015599930 0.025201854  
TRUE 0.560972377 0.632766838 0.564093713 0.565741887 0.706571488 0.651077392  
NA 0.034925671 0.043505332 0.039450118 0.029440219 0.021912400 0.062930324  
NA 0.038190032 0.040124462 0.033889477 0.036392651 0.028209382 0.048561875  
NA 0.956323713 0.958314700 0.942960584 0.949316702 0.961806752 0.907434494  
NA 0.048025801 0.036836532 0.044670673 0.041283492 0.037246207 0.039733700  
NA 0.066117562 0.086071191 0.072583645 0.059850625 0.050251454 0.107291452  
NA 0.194164956 0.211907777 0.191939965 0.203228263 0.149404835 0.192382061  
NA 0.059401555 0.056353063 0.035368989 0.044981114 0.044617266 0.064171413  
NA 0.501098329 0.500762142 0.494944995 0.468776429 0.488028220 0.469743510  
NA 0.218117109 0.191943918 0.171251272 0.160199065 0.128337082 0.165409555  
NA 0.057271607 0.045715928 0.040914660 0.032855172 0.047823515 0.048710606  
NA 0.684633985 0.703934715 0.633836629 0.619246823 0.641105980 0.692574284  
NA 0.052699652 0.058354418 0.050009771 0.044086112 0.050087766 0.060237115  
NA 0.972723344 0.981501988 0.931528746 0.976722927 0.973534579 0.955143296  
NA 0.516137501 0.304708682 0.291451927 0.431009606 0.267776818 0.211852029  
TRUE 0.025982461 0.031060841 0.026626784 0.024542104 0.027880403 0.036643187  
NA 0.051204468 0.054850659 0.046089898 0.051848497 0.050963138 0.074700746  
NA 0.036575951 0.037105381 0.038817941 0.027990020 0.026834313 0.056480085  
NA 0.023089763 0.019363511 0.024710985 0.022863502 0.025437035 0.039364365  
NA 0.102644465 0.101258426 0.092638828 0.126538175 0.131281307 0.123365625  
NA 0.074170584 0.080284066 0.095809544 0.088887558 0.100418527 0.085222929  
NA 0.362409593 0.314241413 0.404500601 0.215598292 0.452113228 0.259364014  
NA 0.024837587 0.039612568 0.036409933 0.035113414 0.030816183 0.042904677  
NA 0.114921040 0.122914054 0.098541964 0.074182814 0.068469927 0.187524620  
NA 0.740536630 0.789142295 0.778943322 0.713398022 0.789335547 0.706180941  
NA 0.030265615 0.027723493 0.026172677 0.023307326 0.021451114 0.028822841  
NA 0.151462460 0.162961594 0.109531094 0.137279496 0.199540107 0.177853550  
NA 0.515386323 0.510891879 0.472001352 0.505724542 0.571042374 0.509353247  
TRUE 0.149758169 0.146548121 0.111944408 0.140490256 0.241317279 0.172379268  
NA 0.744880918 0.784630750 0.664382058 0.772198867 0.755659451 0.725424013  
NA 0.499025821 0.545047463 0.588764421 0.543031965 0.541894052 0.548129993  
NA 0.526598395 0.579472022 0.489824879 0.418666254 0.477670074 0.423960187  
NA 0.099344603 0.108753577 0.086619329 0.100302958 0.098975008 0.102331118  
NA 0.042174059 0.028855336 0.033853093 0.032972825 0.029939996 0.035056660  
TRUE 0.043260861 0.051452573 0.020376385 0.027700568 0.030528758 0.035394350  
NA 0.837835262 0.828113717 0.766312602 0.815762186 0.830379404 0.787710653  
NA 0.455617871 0.580066345 0.433504357 0.496345592 0.514338188 0.510839972  
NA 0.050808998 0.037418988 0.037994814 0.044138815 0.035638019 0.054690858  
NA 0.542854950 0.524974248 0.486414315 0.503033873 0.523305995 0.491154980  
NA 0.047779865 0.044086135 0.044004179 0.036326666 0.034877260 0.072568302  
NA 0.032944443 0.041865581 0.039094883 0.022910365 0.019968700 0.031981830

NA 0.029744695 0.025693085 0.018066713 0.024036768 0.020508482 0.029337314  
NA 0.322094128 0.344381600 0.283523457 0.322304396 0.347019789 0.313681235  
NA 0.035284075 0.039688861 0.047408116 0.035020370 0.031483546 0.048728016  
NA 0.487332579 0.575767697 0.498588212 0.471092479 0.623626334 0.584641944  
NA 0.030825523 0.036313015 0.035022361 0.029696307 0.032127237 0.044828146  
NA 0.291406071 0.341515077 0.288985817 0.288847681 0.281396770 0.304393466  
TRUE 0.065273704 0.057929812 0.055234462 0.048445424 0.049963925 0.058448731  
NA 0.738035690 0.769162050 0.676666171 0.785236413 0.872282324 0.818585038  
NA 0.021816763 0.022677668 0.015124855 0.023690228 0.017806748 0.022370810  
NA 0.458437315 0.518768404 0.470684041 0.446593738 0.542052213 0.571732309  
NA 0.482791510 0.482308268 0.377398762 0.492935764 0.543533518 0.554894355  
NA 0.015667878 0.016804944 0.018756226 0.022210022 0.016830285 0.021474076  
NA 0.020116050 0.019396402 0.024157470 0.020149680 0.021178153 0.033620208  
NA 0.025470255 0.027154573 0.016779923 0.029535240 0.023281303 0.026113935  
NA 0.507679210 0.527224217 0.498356903 0.344654404 0.427502873 0.391364957  
NA 0.028741441 0.027712313 0.024443108 0.022869349 0.027992284 0.027947983  
NA 0.768636202 0.776088773 0.683879713 0.698336932 0.708689722 0.695200342  
NA 0.488650018 0.454818320 0.416249947 0.469344266 0.443991969 0.397111621  
NA 0.540640250 0.572848717 0.467060259 0.527042221 0.687956442 0.625691002  
NA 0.018217897 0.018852234 0.020720816 0.017972169 0.018448627 0.029584783  
NA 0.014476815 0.016938161 0.017010159 0.017763432 0.012897689 0.019409726  
NA 0.242993113 0.290018205 0.222528765 0.237005024 0.261081472 0.272399597  
NA 0.380916525 0.417520410 0.322149451 0.373457194 0.511677025 0.390040199  
NA 0.029897689 0.026879356 0.029826734 0.025499894 0.022919566 0.043188115  
TRUE 0.181756137 0.162714659 0.209254734 0.119871952 0.078611702 0.127601628  
NA 0.709764868 0.831022022 0.776885330 0.795513930 0.799914318 0.765162774  
NA 0.033665289 0.027121733 0.028503093 0.022616734 0.023724888 0.041046193  
TRUE 0.130162252 0.172111365 0.116009924 0.122259163 0.101197689 0.153817322  
NA 0.260713234 0.251811343 0.200550188 0.177006171 0.260935270 0.162140811  
NA 0.022245831 0.017159847 0.015988649 0.019376331 0.018662117 0.019826540  
NA 0.012917760 0.014001826 0.012585299 0.017372404 0.014705057 0.015438024  
NA 0.051167159 0.026377662 0.034668034 0.041350836 0.044618539 0.045644547  
NA 0.026803208 0.023604842 0.023409510 0.021605018 0.017580110 0.025139450  
NA 0.028555524 0.021531751 0.019378749 0.019946962 0.019720401 0.029413852  
NA 0.045470069 0.048700720 0.043293126 0.041578431 0.036217346 0.047467363  
NA 0.028964079 0.026818421 0.022961500 0.033848919 0.026326050 0.024119782  
NA 0.813208574 0.868399890 0.801889379 0.794756407 0.829263699 0.814232770  
NA 0.013177199 0.014964178 0.014284737 0.013626208 0.013379972 0.021886061  
NA 0.814197193 0.879813469 0.819959782 0.857138993 0.853531061 0.785312440  
NA 0.037960891 0.040536119 0.030763368 0.039642227 0.026319439 0.032132690  
NA 0.025083430 0.025272221 0.020414221 0.030414527 0.022161651 0.029340245  
NA 0.031211425 0.027684558 0.023510199 0.035559945 0.033079280 0.031125287  
NA 0.022995723 0.024557346 0.021431194 0.026311146 0.019244574 0.025583466  
NA 0.031267115 0.041497520 0.026826785 0.031314229 0.033031594 0.043643584

NA 0.638775614 0.704924298 0.598060309 0.598233505 0.601779378 0.750068882  
NA 0.486150616 0.532086686 0.471776652 0.508246829 0.538964186 0.587762094  
NA 0.401216328 0.519030833 0.417964090 0.396416373 0.516096436 0.431842278  
NA 0.017252039 0.023937871 0.015456373 0.017017360 0.019992166 0.022741515  
NA 0.564784616 0.591368877 0.525034403 0.465672965 0.496591010 0.458138476  
TRUE 0.041975158 0.058150360 0.041406929 0.053192880 0.052154616 0.072132617  
TRUE 0.672114261 0.678804854 0.587752687 0.618648375 0.699449712 0.647022609  
NA 0.054766705 0.049587220 0.035510295 0.053284679 0.052322864 0.058636679  
NA 0.616809991 0.646572161 0.563552679 0.558989116 0.584710514 0.541578254  
NA 0.709282207 0.799637534 0.810947802 0.737102376 0.792301028 0.720815275  
NA 0.066349731 0.080880822 0.061382289 0.058196962 0.058163558 0.099880392  
NA 0.390202641 0.426464537 0.349768447 0.354337910 0.455529489 0.409034078  
NA 0.015115164 0.010111241 0.012073807 0.016271338 0.015711530 0.016470058  
NA 0.127713105 0.197208470 0.167076893 0.099916503 0.107306536 0.148183162  
NA 0.037561219 0.026655986 0.031951042 0.029903964 0.025292624 0.039626672  
NA 0.566487481 0.635372509 0.552858509 0.609753666 0.673517516 0.673855493  
NA 0.129030370 0.083721240 0.077753281 0.117273518 0.154260346 0.093807838  
NA 0.039221568 0.040240590 0.041181795 0.028020459 0.036773304 0.034178560  
NA 0.019825827 0.028177062 0.021226213 0.026137339 0.027442023 0.043038153  
NA 0.639512494 0.625433221 0.603451239 0.661949037 0.684178981 0.565919017  
NA 0.056229692 0.035322922 0.062129489 0.062523202 0.043620109 0.067192814  
NA 0.043699462 0.043193210 0.036265164 0.038989623 0.039676855 0.048526719  
TRUE 0.619009898 0.653676359 0.585041732 0.609678053 0.469707740 0.620890184  
NA 0.876611320 0.028634151 0.455900132 0.025042569 0.841612342 0.031961177  
NA 0.856560149 0.862606849 0.855895865 0.854145920 0.873646410 0.845201343  
NA 0.054095701 0.099779300 0.039364653 0.050201793 0.052291532 0.064808093  
NA 0.633711848 0.693588276 0.669018462 0.591902684 0.611502096 0.631114942  
NA 0.035796799 0.032188701 0.026211270 0.030520954 0.028813619 0.051919353  
NA 0.029779803 0.035019724 0.029478853 0.035626184 0.032394166 0.054834430  
NA 0.038314687 0.053723625 0.041149641 0.035136361 0.040362904 0.059252950  
NA 0.022486292 0.024405458 0.025953551 0.029451322 0.030163161 0.033272135  
NA 0.025063196 0.026158395 0.023447256 0.021701289 0.022808569 0.031802755  
NA 0.037950127 0.041726826 0.036080463 0.033734597 0.025608876 0.041812364  
NA 0.090254960 0.111639231 0.077081630 0.107806555 0.057380061 0.088589216  
NA 0.016495224 0.012818318 0.011903865 0.015623009 0.018707832 0.017342749  
NA 0.453868597 0.297615035 0.377244628 0.414432330 0.541306875 0.239843392  
NA 0.056278788 0.061576287 0.054913037 0.043765897 0.052224425 0.074597279  
NA 0.043520263 0.050101785 0.042536098 0.050242692 0.043392886 0.060515966  
NA 0.054404002 0.040199017 0.044133062 0.024867614 0.027321580 0.034301922  
NA 0.186422575 0.238512964 0.136194500 0.171251018 0.213300960 0.198574353  
NA 0.065267906 0.066904750 0.062356893 0.060079981 0.067513987 0.065960745  
NA 0.152621427 0.131896786 0.116912982 0.143736028 0.170016859 0.178753354  
NA 0.703138648 0.757077972 0.651402594 0.623108524 0.741398770 0.695154835  
NA 0.195119635 0.165473403 0.155586748 0.171843832 0.200935709 0.227599494

NA 0.746523206 0.736383938 0.753674737 0.710023803 0.736686292 0.687182916  
NA 0.025931315 0.021729183 0.028917120 0.026129771 0.026508576 0.031562761  
NA 0.445351604 0.527985896 0.444564723 0.456800419 0.462762810 0.458298100  
NA 0.509423017 0.538475232 0.445182960 0.515338057 0.598061661 0.540422301  
NA 0.051526854 0.051165534 0.042585052 0.048818549 0.041443013 0.062306668  
NA 0.022649124 0.021509910 0.024859314 0.026975700 0.023708862 0.033319430  
NA 0.802206401 0.846252752 0.744136856 0.633801644 0.753332895 0.692741607  
NA 0.046283708 0.036815377 0.026776841 0.030917128 0.045376293 0.047124703  
NA 0.478429778 0.563571450 0.442007598 0.537420680 0.485561642 0.492871638  
NA 0.013595516 0.013898598 0.014158030 0.020649290 0.013561979 0.026198024  
NA 0.085206466 0.062290061 0.068387144 0.087111097 0.055183744 0.091484333  
NA 0.536497696 0.506115753 0.508021043 0.444981475 0.468102369 0.428771766  
NA 0.353829150 0.334934163 0.324754177 0.308389571 0.330574410 0.320877823  
NA 0.223703286 0.226530677 0.161150247 0.166967121 0.199296555 0.205403716  
TRUE 0.054687016 0.050760609 0.059686028 0.051150733 0.040686784 0.087147879  
NA 0.588899534 0.649987197 0.555384716 0.568596315 0.585786934 0.598076273  
TRUE 0.114421177 0.142910935 0.096962782 0.129760412 0.177081089 0.130031344  
NA 0.516259397 0.532401172 0.452057886 0.466041706 0.491880610 0.485248739  
NA 0.396650224 0.384555907 0.354395221 0.369144077 0.437672868 0.350499234  
NA 0.030026451 0.021863899 0.020084465 0.020651218 0.019025638 0.026128706  
NA 0.580818899 0.704591770 0.627244993 0.585158079 0.626144352 0.624517161  
NA 0.117749656 0.168530002 0.120029901 0.103692334 0.091749912 0.119624590  
NA 0.071883944 0.062584923 0.066154452 0.045931323 0.058248133 0.058480901  
NA 0.022880106 0.020528744 0.025165263 0.022661406 0.017255270 0.032245440  
NA 0.928240845 0.959135216 0.914582647 0.963467889 0.967700934 0.927674851  
NA 0.036317636 0.042590327 0.029743691 0.039315234 0.043836848 0.051650471  
NA 0.018970011 0.016341156 0.032840822 0.025247107 0.027183737 0.021663142  
NA 0.836319741 0.934260775 0.891460646 0.911326011 0.906473278 0.889714572  
NA 0.855575620 0.927094314 0.870455911 0.887197729 0.880954220 0.868322830  
NA 0.857311646 0.890241696 0.867778422 0.872136443 0.930195933 0.867693764  
NA 0.805699650 0.823841293 0.748278699 0.798345570 0.785949998 0.771644452  
NA 0.054276386 0.044945393 0.032886937 0.046637850 0.046604905 0.037295869  
NA 0.020917388 0.020804535 0.022811270 0.026309645 0.020882524 0.025139289  
NA 0.518342655 0.541173851 0.489163742 0.447605283 0.499653402 0.436286423  
NA 0.526165540 0.496356059 0.526099724 0.507745335 0.482669031 0.409803706  
NA 0.041300015 0.041266849 0.036826000 0.038108118 0.029614274 0.046155168  
NA 0.388981607 0.468185631 0.380943520 0.357503875 0.336691473 0.395686300  
NA 0.027393291 0.028363352 0.024778597 0.032330048 0.031294265 0.031585599  
NA 0.073795544 0.068385741 0.056098045 0.070344998 0.064379808 0.056353869  
NA 0.408272613 0.448693664 0.351134191 0.413834635 0.459801316 0.418412024  
NA 0.033193894 0.036226589 0.020800823 0.025326132 0.021338587 0.025217443  
NA 0.047013600 0.060423995 0.049551921 0.063569057 0.058233963 0.061560434  
NA 0.263123469 0.307227618 0.295405777 0.230819862 0.293362796 0.362809588  
NA 0.891795823 0.886895357 0.863235498 0.882182677 0.879244706 0.865902716

TRUE 0.060622834 0.056310533 0.046537607 0.033724805 0.038344075 0.062458983  
NA 0.283023494 0.312543818 0.230771266 0.267205341 0.303912579 0.251309838  
NA 0.042325709 0.025683609 0.025302956 0.022879499 0.022405038 0.028503919  
NA 0.424028568 0.501114535 0.344763521 0.452114832 0.497822513 0.430131206  
NA 0.031409196 0.036571607 0.028189966 0.024462825 0.028748349 0.039206672  
NA 0.320126756 0.355627881 0.267525571 0.274512920 0.354094137 0.315106702  
NA 0.349533605 0.302449960 0.330440106 0.249285745 0.214685411 0.272246967  
NA 0.027061716 0.038559955 0.027208489 0.029021742 0.025092554 0.037302703  
NA 0.100863266 0.132604209 0.099877638 0.114271507 0.116835525 0.108540143  
NA 0.034478284 0.029002741 0.030131895 0.024461738 0.027022655 0.047793872  
NA 0.033823045 0.033562081 0.026190899 0.027659411 0.031876073 0.030582009  
NA 0.039117129 0.034915631 0.028553978 0.034659926 0.030709520 0.040599633  
NA 0.091122339 0.076059043 0.083923287 0.088912857 0.075116124 0.123825434  
NA 0.902019621 0.922517959 0.876304639 0.872151306 0.891718978 0.855898984  
NA 0.040594716 0.040918854 0.041017640 0.048453490 0.037884248 0.050644100  
NA 0.029014034 0.030097701 0.034832533 0.027479661 0.021949174 0.037839943  
NA 0.970628074 0.971499277 0.964734744 0.968273843 0.970506162 0.950158774  
TRUE 0.053143890 0.059111402 0.044445962 0.043184300 0.047900717 0.057482333  
NA 0.026620174 0.028413932 0.028833551 0.032437277 0.056825991 0.035727155  
NA 0.770869801 0.844389543 0.910892516 0.881622576 0.930200365 0.890537982  
NA 0.033189620 0.019485161 0.027639845 0.027551592 0.020611387 0.035387190  
NA 0.052779618 0.040825022 0.044338145 0.049685812 0.046775102 0.054153860  
NA 0.938393260 0.946615861 0.920567088 0.930096402 0.944384090 0.886072041  
TRUE 0.034453223 0.039549284 0.042596697 0.027073928 0.017987393 0.040213888  
NA 0.595599158 0.497512016 0.522051369 0.582163356 0.632602117 0.572215504  
NA 0.428521845 0.467280867 0.365820035 0.403608749 0.428203810 0.411871934  
NA 0.025371198 0.021450933 0.017772771 0.025356740 0.032314704 0.024122507  
NA 0.021484480 0.015149128 0.019325615 0.019163906 0.023928740 0.022436992  
NA 0.441123648 0.398495579 0.389681717 0.374346633 0.386716006 0.317265312  
NA 0.058219912 0.067581937 0.058564023 0.049746151 0.048280063 0.101469408  
NA 0.054708083 0.055117779 0.046924230 0.055367345 0.041994771 0.057721333  
NA 0.042093385 0.047283579 0.036836349 0.055464427 0.049929695 0.029306484  
NA 0.042115222 0.044676490 0.039131343 0.040189627 0.038608969 0.055228747  
NA 0.486072486 0.437972402 0.376857113 0.424802013 0.452997867 0.420036037  
NA 0.030334216 0.024905751 0.017763166 0.014367370 0.015251647 0.026790851  
NA 0.024238403 0.019616396 0.018614002 0.017754756 0.020749462 0.030819013  
NA 0.837664713 0.815924092 0.786805999 0.807963550 0.855417188 0.838498783  
NA 0.381471222 0.311963637 0.126545619 0.102852194 0.088032196 0.338760459  
NA 0.023096929 0.033705024 0.022071265 0.027751256 0.024880364 0.024219737  
NA 0.064286573 0.054644886 0.055482204 0.063734855 0.038675668 0.096798099  
NA 0.056656459 0.063228119 0.042408316 0.054630348 0.051523491 0.063961337  
NA 0.192337329 0.133197026 0.236990470 0.181360789 0.104647245 0.107779208  
NA 0.481336008 0.840566453 0.522577580 0.659904313 0.508334127 0.725269887  
NA 0.819883041 0.830466737 0.786992379 0.804217723 0.767499494 0.802802929

NA 0.026520061 0.022706656 0.016266833 0.026415910 0.016921805 0.029113356  
NA 0.029315816 0.019169004 0.036661653 0.035792605 0.023499342 0.030248856  
NA 0.561779640 0.591324155 0.478736448 0.538792211 0.541900960 0.531350667  
NA 0.743461634 0.826498838 0.710623939 0.723426008 0.702089696 0.705575343  
NA 0.812500536 0.832338950 0.788843995 0.793279189 0.814290412 0.723189275  
NA 0.021406954 0.023266732 0.016180005 0.020714005 0.014269006 0.020885741  
NA 0.927757563 0.867867439 0.656728715 0.922398666 0.889154875 0.707860638  
NA 0.034969997 0.041618376 0.031804161 0.035746532 0.032926557 0.060572465  
NA 0.064637275 0.048931379 0.040614534 0.045121928 0.066377796 0.049067201  
TRUE 0.807210979 0.805860656 0.709939968 0.741857848 0.761502182 0.816814233  
NA 0.135006862 0.129533553 0.121465604 0.117485519 0.122618056 0.121319995  
TRUE 0.523272363 0.568130992 0.467355550 0.425580485 0.523498901 0.441992951  
NA 0.041026054 0.032272462 0.032704599 0.027582861 0.035143328 0.042941569  
NA 0.541309990 0.550357907 0.404448176 0.442183312 0.491770920 0.449734952  
NA 0.683949483 0.747065452 0.681765609 0.629636841 0.597233440 0.626739523  
NA 0.403388452 0.440136529 0.387875363 0.398197721 0.441853764 0.372105410  
NA 0.859076274 0.843998987 0.830472309 0.827996019 0.840804764 0.806070870  
NA 0.036599633 0.041405539 0.039079685 0.051372816 0.033373197 0.047341803  
NA 0.854340183 0.877628401 0.808594450 0.853521974 0.825445927 0.836402917  
NA 0.283683398 0.304094858 0.310472155 0.258025204 0.201549917 0.230892564  
NA 0.046670888 0.063281115 0.045409635 0.050372948 0.039568148 0.080687805  
NA 0.124990816 0.097613630 0.090991894 0.116056986 0.078574573 0.121533150  
TRUE 0.023932058 0.029372291 0.027267185 0.020862897 0.020445284 0.037311101  
TRUE 0.018581077 0.020018026 0.019860481 0.022981839 0.016896468 0.023563697  
TRUE 0.911507066 0.942417492 0.915506944 0.941508080 0.935464604 0.929073477  
NA 0.055965846 0.057307779 0.033561647 0.041004242 0.028274284 0.031239222  
NA 0.858792195 0.887626993 0.836058352 0.856519606 0.823257365 0.838334192  
NA 0.055087265 0.073701581 0.063607993 0.058849323 0.069347049 0.061390554  
NA 0.015347873 0.012852963 0.019606332 0.020641217 0.019064058 0.022415717  
NA 0.027305021 0.038522370 0.029201980 0.026691541 0.029065521 0.045308203  
NA 0.359020233 0.397938799 0.327125045 0.353603520 0.469461000 0.404472400  
NA 0.048624551 0.064792927 0.052992520 0.046989724 0.075208057 0.082313468  
NA 0.849191687 0.866329455 0.853896951 0.824426896 0.830929477 0.843738334  
NA 0.020081987 0.016656580 0.022576118 0.020730079 0.023844927 0.025334590  
NA 0.018851076 0.020768469 0.022171011 0.020072531 0.018798983 0.032076893  
NA 0.836242776 0.873407196 0.851045301 0.858873009 0.832155898 0.849154533  
NA 0.075457773 0.063685435 0.056411202 0.052613930 0.052468375 0.067811195  
NA 0.602721399 0.660874088 0.505260097 0.509043632 0.514144228 0.522260024  
NA 0.051055518 0.108233497 0.074644902 0.051735595 0.050270062 0.061807309  
NA 0.365156521 0.439385595 0.321691604 0.244520995 0.199724551 0.189154256  
NA 0.369701967 0.396617500 0.325315614 0.391675837 0.509547849 0.384943800  
NA 0.044002442 0.048471189 0.029695737 0.036641534 0.035737652 0.034248341  
NA 0.916726157 0.934478327 0.881987869 0.890867177 0.908808963 0.891055832  
NA 0.726366206 0.751977533 0.735893420 0.699846168 0.785881445 0.781147323

|      |             |             |             |             |             |             |
|------|-------------|-------------|-------------|-------------|-------------|-------------|
| TRUE | 0.877675144 | 0.877464217 | 0.859958797 | 0.878817748 | 0.892898472 | 0.868081920 |
| TRUE | 0.394754721 | 0.454514477 | 0.375169899 | 0.382597170 | 0.347444633 | 0.362722244 |
| NA   | 0.027909238 | 0.022466361 | 0.020576349 | 0.024437488 | 0.025970391 | 0.024869637 |
| NA   | 0.017527244 | 0.019369698 | 0.015982017 | 0.019133354 | 0.018747242 | 0.028902292 |
| NA   | 0.218814417 | 0.319168082 | 0.217510540 | 0.291601275 | 0.288094342 | 0.328902425 |
| NA   | 0.771333388 | 0.770458640 | 0.782088834 | 0.831567989 | 0.880004824 | 0.694595300 |
| NA   | 0.380135893 | 0.418723112 | 0.354283390 | 0.348215908 | 0.365783633 | 0.341252562 |
| NA   | 0.323546926 | 0.356354924 | 0.277538368 | 0.268608594 | 0.297781433 | 0.303237723 |
| NA   | 0.804634002 | 0.823350350 | 0.750734754 | 0.799308959 | 0.765895997 | 0.829199264 |
| NA   | 0.020950281 | 0.020409064 | 0.019319556 | 0.023723995 | 0.019881216 | 0.027760354 |
| NA   | 0.528201971 | 0.597416681 | 0.508585998 | 0.498849930 | 0.525822854 | 0.562480375 |
| NA   | 0.194836674 | 0.162301791 | 0.153995311 | 0.160429344 | 0.161848779 | 0.170126907 |
| NA   | 0.047829916 | 0.045493374 | 0.045787239 | 0.036437194 | 0.030802412 | 0.064493862 |
| NA   | 0.019935554 | 0.019453786 | 0.018525171 | 0.018580051 | 0.018186692 | 0.021766306 |
| NA   | 0.023182220 | 0.019509058 | 0.022185804 | 0.020252808 | 0.021363298 | 0.032832549 |
| NA   | 0.893579966 | 0.868468786 | 0.881107330 | 0.895302936 | 0.891642500 | 0.826871386 |
| NA   | 0.051591854 | 0.054733172 | 0.043576028 | 0.049925737 | 0.041645595 | 0.049406625 |
| NA   | 0.740237606 | 0.748181039 | 0.708943606 | 0.701374324 | 0.723301667 | 0.657084178 |
| TRUE | 0.076088874 | 0.145970005 | 0.091476013 | 0.079628522 | 0.068833544 | 0.098870008 |
| NA   | 0.807004263 | 0.845354254 | 0.805736992 | 0.816100662 | 0.830050392 | 0.771317583 |
| NA   | 0.208585190 | 0.203479742 | 0.187224700 | 0.161966542 | 0.166157919 | 0.168384678 |
| NA   | 0.059895171 | 0.050774531 | 0.054557564 | 0.050550761 | 0.074591729 | 0.065116966 |
| NA   | 0.511031127 | 0.591882428 | 0.484024087 | 0.507331426 | 0.499968356 | 0.504615472 |
| NA   | 0.830639944 | 0.913411683 | 0.844363124 | 0.843991444 | 0.825093399 | 0.839003996 |
| NA   | 0.060160347 | 0.079780416 | 0.077315733 | 0.071971667 | 0.066534820 | 0.113020890 |
| NA   | 0.034480862 | 0.026150569 | 0.036987326 | 0.025606818 | 0.019338670 | 0.030678732 |
| NA   | 0.054394333 | 0.042914240 | 0.044550023 | 0.048574826 | 0.075921334 | 0.051664652 |
| NA   | 0.019801856 | 0.013487093 | 0.018378892 | 0.020259914 | 0.015235496 | 0.019943290 |
| NA   | 0.220323475 | 0.228369242 | 0.202937525 | 0.204559890 | 0.232384309 | 0.177632758 |
| NA   | 0.627375585 | 0.653423298 | 0.605950635 | 0.562488988 | 0.589978066 | 0.580369130 |
| NA   | 0.419411399 | 0.456959319 | 0.402608618 | 0.438861069 | 0.477501761 | 0.482034511 |
| NA   | 0.046293270 | 0.063187456 | 0.044490111 | 0.041072501 | 0.037195469 | 0.053796045 |
| NA   | 0.767892315 | 0.812860045 | 0.739822823 | 0.752402724 | 0.772105545 | 0.764162931 |
| NA   | 0.024675001 | 0.023075550 | 0.022450455 | 0.027700804 | 0.022970895 | 0.032641047 |
| NA   | 0.792988416 | 0.818479430 | 0.783555999 | 0.721915432 | 0.754366487 | 0.765487901 |
| NA   | 0.054590513 | 0.052896039 | 0.041201931 | 0.053619805 | 0.046159486 | 0.059471243 |
| NA   | 0.033056443 | 0.041531331 | 0.041150253 | 0.037961859 | 0.035991315 | 0.045148422 |
| NA   | 0.154976716 | 0.122590129 | 0.120221885 | 0.170199116 | 0.169648858 | 0.156595065 |
| NA   | 0.052530945 | 0.056126077 | 0.038518422 | 0.047683441 | 0.041909064 | 0.044329026 |
| TRUE | 0.103764495 | 0.118668104 | 0.100965935 | 0.135676879 | 0.116108354 | 0.091681051 |
| NA   | 0.519278459 | 0.518139241 | 0.470079522 | 0.468430114 | 0.493826161 | 0.521581099 |
| NA   | 0.050811043 | 0.073530180 | 0.049731106 | 0.044914622 | 0.046748988 | 0.098898196 |
| TRUE | 0.125961365 | 0.144151064 | 0.119701580 | 0.117658777 | 0.136107046 | 0.103312708 |
| NA   | 0.021786324 | 0.018638256 | 0.027283450 | 0.026907095 | 0.021347601 | 0.033442274 |

NA 0.837435457 0.810866093 0.753079401 0.812397917 0.776493024 0.804265645  
NA 0.887114344 0.874840877 0.874273894 0.879086973 0.884251955 0.870681241  
NA 0.052675743 0.047263724 0.053777457 0.055305169 0.038201341 0.078220705  
NA 0.016771401 0.016822675 0.018699287 0.017514452 0.018406645 0.021668194  
NA 0.036300473 0.039418965 0.029318044 0.030849067 0.028335949 0.036619363  
NA 0.031088459 0.047263182 0.022634237 0.024390192 0.027695413 0.028253054  
NA 0.438837007 0.473630655 0.393042888 0.342952740 0.371094810 0.378817590  
NA 0.036844606 0.033468893 0.030981062 0.029604638 0.031908616 0.046446561  
NA 0.033769518 0.031979214 0.028075365 0.036042176 0.027777848 0.037569153  
NA 0.027485689 0.038819652 0.024445770 0.022210379 0.022023906 0.043349309  
NA 0.035258251 0.038087397 0.024084429 0.032529001 0.019507697 0.040284907  
TRUE 0.154630688 0.161074362 0.127898237 0.101291167 0.081653853 0.100204608  
NA 0.832538442 0.780026944 0.787793776 0.745428798 0.746562697 0.792886783  
NA 0.013876494 0.012091987 0.010180913 0.010025118 0.009200418 0.015153530  
NA 0.302057161 0.348706408 0.285036171 0.247198495 0.255176912 0.271919888  
NA 0.046890660 0.045420844 0.038582139 0.058548483 0.068952234 0.062906223  
NA 0.301080922 0.300530685 0.252768403 0.240796446 0.209735114 0.212079604  
NA 0.061036722 0.075125656 0.065042905 0.044382239 0.036626532 0.098430257  
NA 0.029693104 0.029422468 0.029662115 0.030204695 0.026840956 0.037125000  
NA 0.040960374 0.028595324 0.033620105 0.031001669 0.038480850 0.051845130  
NA 0.027095362 0.030982585 0.029095351 0.025837582 0.036067598 0.035021859  
NA 0.099601105 0.131680899 0.113237331 0.091055739 0.177226944 0.145557071  
NA 0.864363447 0.919073006 0.848594628 0.876799534 0.914423002 0.855374749  
NA 0.043515008 0.035139784 0.042490737 0.042109950 0.035798153 0.085754174  
NA 0.028298088 0.029585445 0.019680702 0.025658536 0.023791819 0.034548507  
NA 0.066912998 0.094830677 0.060440466 0.082880117 0.031189157 0.078490426  
NA 0.033307676 0.036195300 0.034545642 0.034526496 0.025021749 0.046797324  
NA 0.410628425 0.400961128 0.385508733 0.421866287 0.627559337 0.514644251  
NA 0.035280692 0.045149143 0.039815017 0.027276965 0.032005815 0.095552361  
NA 0.033424113 0.026746279 0.039568474 0.029272671 0.037201139 0.031739042  
TRUE 0.061016495 0.062256470 0.048660786 0.048803718 0.047010679 0.053903888  
NA 0.025607910 0.015199027 0.023132179 0.020614803 0.023779023 0.023624628  
NA 0.282707325 0.347097692 0.278735386 0.282368997 0.393326068 0.346507845  
NA 0.920569911 0.914684687 0.908315903 0.910231731 0.929576524 0.900419443  
NA 0.369974858 0.442613072 0.321275661 0.375764846 0.438878769 0.378369432  
NA 0.251955480 0.307689830 0.204471614 0.182233237 0.142997104 0.153850567  
TRUE 0.434654747 0.426857867 0.389738748 0.429372050 0.561194163 0.461510224  
NA 0.144142586 0.164590822 0.160361479 0.159684710 0.201307378 0.186888787  
NA 0.879310344 0.907326710 0.834325305 0.848036453 0.868193139 0.831478950  
NA 0.037880388 0.051204669 0.046409626 0.041318161 0.029938492 0.068943331  
NA 0.089027554 0.074236248 0.064206724 0.074842605 0.085885172 0.096304405  
NA 0.631183237 0.633842226 0.622363366 0.613413447 0.635265999 0.589657659  
NA 0.264834258 0.242807783 0.087207761 0.085945816 0.068527017 0.251225722  
NA 0.024292883 0.020496193 0.017326836 0.022356792 0.021930439 0.021502126



NA 0.530331968 0.606053759 0.489801369 0.533707150 0.456634746 0.459262413  
NA 0.020112393 0.025926591 0.021098963 0.018724609 0.024061807 0.030268397  
NA 0.037454484 0.029853775 0.022563695 0.024908484 0.030556573 0.030162895  
NA 0.025156516 0.028685367 0.022007145 0.029168514 0.023054828 0.030885995  
NA 0.068438560 0.071502822 0.048367925 0.063557798 0.051824957 0.066822245  
NA 0.036131771 0.041756003 0.035227164 0.033546232 0.037913184 0.045304695  
NA 0.017524597 0.015868181 0.012990851 0.013989960 0.014053090 0.017320497  
NA 0.705434020 0.720020018 0.665894984 0.698528357 0.734036070 0.703023802  
NA 0.029499832 0.030236382 0.024007774 0.021589504 0.026060680 0.043456450  
NA 0.024407479 0.020987208 0.017526708 0.021205464 0.021738833 0.025435040  
NA 0.168446063 0.193385704 0.153120251 0.185183653 0.159856465 0.160859139  
NA 0.949227628 0.969544840 0.948727998 0.945004384 0.847895824 0.938572277  
NA 0.036797842 0.048349666 0.041343500 0.032609177 0.033218172 0.074095656  
NA 0.023334164 0.020524130 0.021669729 0.034334761 0.030779056 0.035569618  
NA 0.796483670 0.833500569 0.745470577 0.783110847 0.780335139 0.793938975  
TRUE 0.544521464 0.662860846 0.539848708 0.576831525 0.583240144 0.553950460  
NA 0.041364777 0.032250344 0.034529981 0.044493690 0.040274539 0.039075130  
NA 0.032463442 0.021643310 0.022375237 0.027411137 0.016496770 0.034977134  
TRUE 0.053134053 0.055122444 0.031810408 0.043004776 0.034474841 0.052479114  
TRUE 0.555587965 0.552738914 0.434122314 0.395900198 0.379290072 0.517186258  
NA 0.125829069 0.177987794 0.130266068 0.111952716 0.121129745 0.156554560  
NA 0.080243638 0.101976761 0.079585905 0.067725996 0.071176509 0.206401156  
NA 0.035001757 0.035918392 0.029985397 0.034265206 0.026461369 0.046487106  
NA 0.610718587 0.712179327 0.542054574 0.664517931 0.639684801 0.778667538  
TRUE 0.059141828 0.043852148 0.062849489 0.041671659 0.046180296 0.076404314  
NA 0.034235982 0.045744165 0.030369985 0.025819363 0.031158456 0.030519079  
NA 0.869685504 0.904388783 0.801752110 0.887938212 0.901096078 0.888818471  
NA 0.023089754 0.026837994 0.025330933 0.027120670 0.023003531 0.028341626  
NA 0.024353359 0.027132146 0.021315335 0.023913641 0.029451982 0.026492881  
NA 0.036749008 0.033522730 0.029359587 0.035486060 0.024109362 0.055019390  
NA 0.014483524 0.011536762 0.010551098 0.010032547 0.013312671 0.012802490  
NA 0.963613267 0.966579966 0.952226773 0.957965240 0.961809314 0.954928210  
NA 0.618647873 0.614183780 0.571396900 0.610605678 0.716291071 0.663414379  
NA 0.032480903 0.032888223 0.020974268 0.028770912 0.029297837 0.040823923  
NA 0.057831620 0.063873598 0.061878565 0.051597735 0.053474787 0.072828258  
NA 0.024023482 0.025101724 0.020114305 0.018548233 0.018538692 0.025414555  
NA 0.039569603 0.042614990 0.035885327 0.031693608 0.029324192 0.048039254  
NA 0.173532304 0.141671397 0.215198866 0.246705750 0.225491092 0.134956328  
NA 0.017102079 0.020101582 0.017923529 0.017454925 0.024370007 0.024081998  
NA 0.014984724 0.020541628 0.013978891 0.011571780 0.013178848 0.018099012  
TRUE 0.539656699 0.541734993 0.507221460 0.517156600 0.494018844 0.563362780  
NA 0.049510104 0.039060733 0.040477298 0.028994125 0.039507852 0.043099742  
TRUE 0.167675816 0.174096240 0.156594203 0.176574037 0.164832034 0.171199513  
NA 0.030193293 0.035563438 0.028881646 0.026300771 0.024655584 0.038313797

NA 0.032364714 0.029212277 0.023606684 0.024672767 0.024819866 0.030458432  
NA 0.251488945 0.240384106 0.206354311 0.197147518 0.271049487 0.208270416  
NA 0.169861176 0.225099699 0.130260263 0.134458212 0.135563547 0.151386228  
NA 0.095654446 0.106532506 0.052371865 0.049146532 0.066815002 0.068414197  
NA 0.031436341 0.049737703 0.042731651 0.042816688 0.029901001 0.076935890  
NA 0.072306073 0.068195752 0.057745627 0.062853635 0.063312357 0.083810421  
NA 0.016885386 0.013165128 0.016903086 0.017095353 0.012088471 0.017197516  
NA 0.024750396 0.014753108 0.023375698 0.024996560 0.024113456 0.020670941  
NA 0.427372581 0.507036631 0.371961073 0.326612453 0.481227271 0.371851005  
TRUE 0.880763990 0.915313815 0.901428887 0.892879553 0.896683683 0.884455750  
NA 0.037161624 0.048465587 0.027531896 0.033863924 0.036151116 0.038615604  
NA 0.078531118 0.062903423 0.079441653 0.064083581 0.060349228 0.059794323  
NA 0.864278039 0.830396533 0.694510939 0.780087741 0.718879176 0.738156731  
NA 0.359673196 0.377314725 0.364476874 0.391992160 0.394613531 0.404615895  
NA 0.439387238 0.506635780 0.409693458 0.268467714 0.469826744 0.422871250  
TRUE 0.857071256 0.883742296 0.859063943 0.872331455 0.878181845 0.822467076  
NA 0.026220508 0.020606083 0.022064642 0.023321147 0.019182358 0.028419651  
NA 0.201928572 0.199187382 0.161328040 0.130760223 0.099293309 0.127834366  
NA 0.047463997 0.044867606 0.036301661 0.037373927 0.037360943 0.045716187  
NA 0.239292554 0.305667692 0.219176346 0.196907478 0.162046207 0.207913413  
NA 0.024920887 0.017280518 0.016908924 0.014801296 0.018284523 0.022935541  
NA 0.626960355 0.681169495 0.575162052 0.597996672 0.698841615 0.662960184  
NA 0.040635137 0.047002947 0.046721580 0.028973119 0.035414365 0.047341652  
NA 0.046042542 0.049212878 0.067669398 0.041235870 0.047509283 0.090011984  
NA 0.031574090 0.031497847 0.030965964 0.026293554 0.029272107 0.052620058  
NA 0.212414951 0.194443459 0.139714461 0.176328222 0.205383546 0.161339328  
NA 0.029810118 0.028557550 0.025596244 0.029593665 0.024691393 0.046529035  
NA 0.031129689 0.025137834 0.022251241 0.024359290 0.017923148 0.027556839  
NA 0.035646793 0.036227858 0.032652450 0.032475172 0.027139490 0.044839575  
NA 0.962274189 0.958554319 0.950688746 0.959965494 0.964884754 0.926418216  
NA 0.022863917 0.025855704 0.019690385 0.025552006 0.020095400 0.027156526  
NA 0.040685593 0.052564997 0.033945433 0.041285537 0.040508057 0.053328016  
NA 0.219530544 0.240095676 0.195537666 0.234756781 0.260998142 0.245657173  
NA 0.112742921 0.095853748 0.118168911 0.101641205 0.109551344 0.090404298  
NA 0.029700222 0.032977174 0.028458243 0.030638493 0.026334212 0.039172565  
NA 0.026195975 0.025268817 0.023429832 0.023892361 0.023419591 0.025318544  
NA 0.182068020 0.156110178 0.130431916 0.131578766 0.118273197 0.131974227  
NA 0.223246244 0.316817244 0.182372790 0.239909747 0.235111259 0.258038878  
NA 0.020065874 0.017380746 0.020722816 0.020808962 0.017380030 0.027130769  
TRUE 0.903541115 0.924973702 0.907319261 0.918967627 0.951015063 0.886196593  
TRUE 0.382219402 0.428502188 0.369486176 0.452382965 0.415655962 0.494867426  
NA 0.932745000 0.936035526 0.900108133 0.931059309 0.910764888 0.876323171  
NA 0.017273426 0.013918497 0.010994097 0.014312233 0.016017485 0.022407246  
NA 0.251072955 0.305418863 0.237624407 0.197555559 0.179322932 0.221177711

NA 0.018304435 0.016520328 0.013352125 0.015000694 0.017988979 0.016295207  
TRUE 0.016965793 0.019592555 0.018871673 0.018398569 0.018150995 0.019773607  
NA 0.054712954 0.049075963 0.052636464 0.047271951 0.042795585 0.066227993  
NA 0.035858695 0.022692256 0.025958288 0.033845151 0.024515830 0.026896466  
NA 0.058357848 0.055637026 0.060148909 0.045391663 0.049881211 0.069511242  
NA 0.019772819 0.021270358 0.016659074 0.022040518 0.022015059 0.023913680  
NA 0.815816189 0.809937129 0.797732670 0.783463215 0.818565900 0.823857531  
NA 0.057474765 0.046951465 0.037394808 0.041958423 0.041018566 0.040969908  
NA 0.017911298 0.020345301 0.017917270 0.013192449 0.019555483 0.019103621  
NA 0.602030004 0.619847922 0.566574629 0.596337217 0.604285997 0.599897794  
NA 0.457685686 0.435632140 0.396463169 0.416605420 0.441899028 0.402029028  
NA 0.765048389 0.807176149 0.735642947 0.748037105 0.773268178 0.712486147  
NA 0.601097238 0.651967735 0.546044251 0.468801142 0.579597353 0.528179925  
NA 0.416011795 0.484451483 0.423459707 0.412852525 0.438922645 0.456323115  
NA 0.025040658 0.029851884 0.020781050 0.029416307 0.022180097 0.026840990  
NA 0.023473567 0.019838804 0.018767083 0.022253153 0.019273375 0.028472985  
NA 0.848908713 0.909942363 0.823111938 0.804943232 0.824383910 0.861103530  
NA 0.024130841 0.024903987 0.029303339 0.020944935 0.020122194 0.026966339  
NA 0.019945677 0.022621156 0.020148097 0.022568333 0.024440036 0.025089013  
NA 0.053956770 0.034766948 0.048659913 0.055113802 0.043528723 0.037082531  
NA 0.079457513 0.075577009 0.052325973 0.060247098 0.058324728 0.079084275  
NA 0.680465364 0.766180304 0.706524834 0.690918287 0.731161371 0.712058621  
NA 0.029555776 0.023894497 0.024919466 0.028349336 0.030769380 0.038196517  
NA 0.026962765 0.021107849 0.035245657 0.037984424 0.033616728 0.049337697  
NA 0.024754072 0.018519419 0.016713350 0.027764803 0.030589860 0.033120731  
NA 0.426847301 0.459306671 0.389028541 0.388202704 0.511671530 0.408081504  
TRUE 0.072077994 0.083767789 0.071283014 0.064422270 0.063326458 0.066922174  
NA 0.864983049 0.854042667 0.893163126 0.867837921 0.896067056 0.888202963  
NA 0.039141780 0.032905963 0.040666714 0.032105903 0.036217082 0.062046249  
NA 0.870893707 0.874641820 0.822428693 0.847355803 0.866339030 0.809338364  
NA 0.056825757 0.045283577 0.059214798 0.048574300 0.062590035 0.054150925  
NA 0.036612094 0.026716236 0.019476454 0.038914790 0.021677217 0.035321196  
TRUE 0.023011027 0.025951013 0.020802137 0.020276329 0.017174066 0.025417947  
NA 0.201609405 0.205814905 0.197049221 0.193265624 0.193208796 0.207243853  
NA 0.431136023 0.446829547 0.393619323 0.405047821 0.405221969 0.414672708  
NA 0.047833638 0.038562730 0.033003924 0.058439233 0.035164540 0.038031571  
NA 0.159226409 0.233949603 0.153071067 0.168960164 0.160522379 0.170331156  
NA 0.285347563 0.218915640 0.272893734 0.192664168 0.317841886 0.266428008  
NA 0.041963661 0.034345933 0.024694720 0.026269183 0.028518147 0.027149914  
NA 0.409907526 0.397996162 0.379669569 0.340867382 0.357878037 0.320864847  
NA 0.106235407 0.117247582 0.091404389 0.135729942 0.105271095 0.146817081  
NA 0.045926715 0.051141218 0.037211684 0.038226734 0.053114356 0.051332646  
TRUE 0.629389586 0.697331604 0.639242537 0.725949643 0.776455735 0.662931163  
NA 0.831921873 0.866703024 0.863592430 0.847028527 0.893517855 0.842801358

NA 0.311792570 0.268665790 0.361224206 0.295739880 0.300023719 0.404251158  
NA 0.439401774 0.467902672 0.371820906 0.455286292 0.500233280 0.449890717  
NA 0.057463307 0.037646438 0.032552665 0.037259072 0.040994721 0.039528274  
NA 0.076507769 0.073867634 0.053140238 0.054437809 0.058570617 0.073650508  
NA 0.235385169 0.260103400 0.191208779 0.209818336 0.196389231 0.209132087  
NA 0.971795600 0.976422957 0.966422334 0.977110936 0.979510473 0.956750136  
NA 0.785584180 0.775439146 0.786690611 0.771840152 0.792274492 0.788448231  
NA 0.586610423 0.628802913 0.538822174 0.555972553 0.559214103 0.587507094  
NA 0.050769083 0.057563514 0.065729647 0.055468581 0.035690052 0.164674980  
NA 0.053136691 0.045699360 0.043193191 0.052827254 0.047895534 0.044196059  
NA 0.084685600 0.128424872 0.098527654 0.117998291 0.098678653 0.159224947  
NA 0.032592516 0.026499320 0.029850597 0.024208791 0.024878340 0.031469951  
NA 0.040204411 0.038948851 0.033709598 0.033409529 0.028921376 0.060782992  
NA 0.113403073 0.109862142 0.099306089 0.100755228 0.154356171 0.132843260  
NA 0.028944109 0.036649484 0.020527152 0.018416480 0.023921608 0.042475852  
NA 0.048301308 0.063105695 0.031744322 0.048743251 0.037979928 0.065717503  
NA 0.023175015 0.021166559 0.015200927 0.017609442 0.015806321 0.023784749  
NA 0.090456704 0.093624651 0.071714195 0.079558149 0.068964641 0.098293154  
NA 0.241920649 0.211966033 0.093738603 0.087412848 0.070811968 0.196160899  
NA 0.434535952 0.401172916 0.421777060 0.337604517 0.378187867 0.366938800  
NA 0.040691707 0.040379065 0.033843148 0.039967260 0.051487514 0.043800966  
TRUE 0.369582336 0.382280362 0.328846140 0.323740400 0.379119734 0.324104621  
NA 0.033059847 0.027811934 0.021093953 0.021798934 0.024020669 0.022420317  
NA 0.053384090 0.073096393 0.051157777 0.055182336 0.047179872 0.063888247  
NA 0.644439052 0.637340048 0.593766663 0.584981889 0.646806029 0.578976117  
NA 0.088703399 0.127840138 0.067784508 0.075145181 0.054871675 0.090319158  
TRUE 0.574876647 0.614012180 0.519765388 0.592493617 0.685579341 0.613172732  
NA 0.601300501 0.666259253 0.604380235 0.570652209 0.529210321 0.654116174  
NA 0.699665845 0.735074656 0.658912859 0.659170151 0.664849811 0.734227651  
NA 0.032632393 0.032168612 0.033337348 0.034285954 0.033361418 0.048601157  
TRUE 0.038583632 0.054344265 0.041292829 0.030892241 0.037522378 0.053462946  
NA 0.035719304 0.043390183 0.031471532 0.037182627 0.041935869 0.039239387  
NA 0.020516509 0.020246563 0.017635665 0.020723046 0.013889578 0.022626272  
NA 0.048255661 0.047020491 0.055413355 0.045964870 0.049042717 0.055911796  
NA 0.018811974 0.018776251 0.017742097 0.018874950 0.020243836 0.020182650  
NA 0.043100349 0.053568523 0.052075039 0.046316059 0.040116577 0.079428633  
NA 0.049701384 0.040081922 0.035032240 0.037510015 0.033474670 0.045241837  
NA 0.023586105 0.024279664 0.020895129 0.016823852 0.023892128 0.027172182  
NA 0.054516438 0.055568925 0.045805265 0.055020921 0.063343246 0.071692540  
NA 0.029056955 0.017758749 0.018056637 0.021206193 0.028165731 0.029413353  
TRUE 0.046893934 0.047247013 0.038972002 0.041042671 0.042328430 0.041653926  
NA 0.087138386 0.051244501 0.064426924 0.054069984 0.069827270 0.040527661  
NA 0.024262507 0.020995557 0.022356737 0.021746751 0.027563873 0.019048153  
NA 0.856151255 0.893143501 0.877992001 0.907053295 0.922925785 0.866386349

NA 0.052813675 0.050217845 0.048125411 0.040553633 0.043761653 0.055217962  
NA 0.562002160 0.592288408 0.515801895 0.517667830 0.495212858 0.495876460  
NA 0.049977805 0.044493900 0.037655772 0.044025275 0.049581737 0.054231028  
NA 0.049302220 0.052924822 0.037576257 0.046252715 0.033551107 0.051549151  
NA 0.620865213 0.643546181 0.513149435 0.534650787 0.507968364 0.502236186  
NA 0.143477747 0.136194672 0.103135831 0.070088561 0.039724777 0.088630404  
NA 0.672983711 0.700742697 0.637548547 0.645988612 0.671722004 0.665547750  
NA 0.018473923 0.031453832 0.021230125 0.020000474 0.024667909 0.033166320  
NA 0.355069961 0.376141194 0.293160833 0.247568656 0.226353199 0.246167259  
NA 0.046333639 0.044863698 0.038276574 0.043988484 0.035663611 0.042495044  
NA 0.155120129 0.136324163 0.137821904 0.141091540 0.145964755 0.129054601  
NA 0.050713772 0.062283266 0.077428918 0.058269315 0.053091725 0.082453475  
NA 0.343356081 0.469082233 0.324645378 0.343813574 0.351363938 0.464433931  
NA 0.780872201 0.879518480 0.818780791 0.853007660 0.820837909 0.834709687  
TRUE 0.031125041 0.042463431 0.026086821 0.023465650 0.037004555 0.028889646  
TRUE 0.069778309 0.076007164 0.056604851 0.052839590 0.059183541 0.082251910  
NA 0.081571619 0.085144709 0.077510304 0.079615559 0.097363224 0.097263289  
NA 0.870559134 0.892957336 0.900528071 0.885732834 0.887524488 0.855574981  
NA 0.387588892 0.422258013 0.346375025 0.339965275 0.321665017 0.286608311  
NA 0.018530577 0.016646287 0.018402099 0.018559111 0.020235227 0.025547506  
NA 0.083681973 0.149224178 0.101786993 0.086635336 0.120941307 0.165654891  
NA 0.055149062 0.052570903 0.041905707 0.041370058 0.037050788 0.056721516  
NA 0.032408028 0.034024455 0.020814767 0.028601159 0.030300812 0.032220885  
NA 0.028798812 0.034589779 0.047255190 0.027093685 0.038397471 0.051501674  
NA 0.060723384 0.089359590 0.053813468 0.053721922 0.066644030 0.070440892  
NA 0.028997416 0.026255730 0.023250242 0.028094413 0.029088930 0.026960356  
TRUE 0.052350408 0.065299160 0.035766811 0.042489569 0.050717913 0.050171605  
NA 0.496083120 0.588421189 0.396134799 0.407352341 0.446195132 0.410624412  
NA 0.035610427 0.035960056 0.033696303 0.029791353 0.038884542 0.047942253  
NA 0.036103001 0.023052859 0.027342837 0.035801808 0.023701132 0.031296909  
NA 0.073456513 0.252347298 0.112085735 0.103516830 0.143371492 0.157207658  
NA 0.059495793 0.050360117 0.037084255 0.048420259 0.044940467 0.041424845  
NA 0.523997230 0.576694879 0.628434580 0.533782593 0.481668633 0.521974041  
NA 0.026770030 0.025819780 0.030164169 0.023039149 0.023502008 0.038044593  
NA 0.038750527 0.026518241 0.022339899 0.033650696 0.025579314 0.034216034  
NA 0.801179179 0.852797530 0.829629712 0.753283555 0.660064219 0.662444865  
NA 0.423320623 0.436654471 0.386402840 0.365245378 0.386248598 0.406869613  
NA 0.023894506 0.030154757 0.023316653 0.024920318 0.020415448 0.033801639  
NA 0.028344707 0.022379595 0.024062932 0.024938889 0.032338772 0.033384247  
NA 0.678614696 0.715843961 0.701033388 0.697926744 0.836355248 0.738243991  
NA 0.061848706 0.063948313 0.057270348 0.047213145 0.060846064 0.064350032  
NA 0.032731202 0.052265870 0.045477446 0.032931136 0.033405005 0.058065503  
NA 0.103472065 0.112600157 0.082964249 0.054066432 0.030829117 0.050914058  
NA 0.023261993 0.030149503 0.026894113 0.033661074 0.023110794 0.035597605

NA 0.034234040 0.037662676 0.028356423 0.035728399 0.037120083 0.035344413  
NA 0.366234282 0.482946430 0.443410681 0.382589296 0.509002412 0.479645401  
NA 0.022137882 0.021834216 0.017660376 0.025721376 0.023482281 0.021669942  
TRUE 0.033322946 0.039961905 0.030146012 0.033509850 0.023741532 0.042747909  
TRUE 0.178122893 0.178753711 0.137993922 0.178165043 0.168552860 0.186051944  
NA 0.333872033 0.051755549 0.382704446 0.023835555 0.033558324 0.101231725  
TRUE 0.148720100 0.175491894 0.145518944 0.165847843 0.230267537 0.202524869  
NA 0.015834286 0.017582502 0.023958655 0.021149837 0.015988195 0.022755211  
NA 0.777354544 0.742230392 0.722039610 0.717967518 0.778059179 0.806578822  
NA 0.019668531 0.015034109 0.020425395 0.029260451 0.019457969 0.026177487  
TRUE 0.167534362 0.171677660 0.161874733 0.173285232 0.155111944 0.221012929  
NA 0.028185607 0.015843068 0.017335576 0.019692575 0.022223398 0.022618538  
NA 0.023234878 0.026962962 0.023680115 0.027536765 0.029122060 0.030637198  
NA 0.039061494 0.034734335 0.056521120 0.039696641 0.035019690 0.053631928  
NA 0.121995229 0.162273520 0.124593712 0.064824817 0.132216572 0.191072002  
NA 0.024101242 0.022729887 0.019109831 0.020412558 0.019599679 0.027420465  
NA 0.848014924 0.878946143 0.871910163 0.870124723 0.852836869 0.820547489  
TRUE 0.066528889 0.083200621 0.083587578 0.067433294 0.046114886 0.149111290  
NA 0.125992929 0.102325313 0.089659240 0.103884112 0.153707741 0.125538399  
TRUE 0.957901696 0.954488706 0.921677909 0.960980608 0.961692569 0.944841493  
NA 0.021489816 0.020259388 0.013451370 0.021799331 0.025460237 0.026821609  
NA 0.066047597 0.062630006 0.081669089 0.069070203 0.064949994 0.123910500  
NA 0.045590559 0.047352665 0.054664483 0.045857822 0.038664211 0.054966068  
NA 0.057903377 0.049334324 0.048912947 0.053670317 0.051970940 0.061790478  
NA 0.030792046 0.041047695 0.031170854 0.027048420 0.031702660 0.040058012  
NA 0.036011426 0.025928055 0.029309678 0.037565907 0.039031919 0.041277459  
NA 0.028653179 0.034365988 0.033382380 0.039604032 0.039941751 0.034731591  
TRUE 0.311830820 0.314948732 0.230032813 0.245969924 0.149935000 0.221369969  
NA 0.569849576 0.582205930 0.573188346 0.585865971 0.568923881 0.556638873  
NA 0.024884152 0.019006593 0.021284767 0.023897638 0.021668089 0.028686449  
NA 0.071962430 0.102312258 0.061188983 0.083147271 0.062827941 0.089500824  
NA 0.034352274 0.030961948 0.023025013 0.027321924 0.032253565 0.022437068  
NA 0.959183607 0.962677174 0.942059153 0.956002106 0.967840138 0.907683744  
NA 0.047823286 0.040383150 0.036197126 0.038539834 0.033933313 0.039593779  
NA 0.040744696 0.053005252 0.035698255 0.030072521 0.031221372 0.047966364  
NA 0.042304119 0.039837773 0.039396222 0.028422059 0.028867713 0.060017085  
TRUE 0.134872915 0.131335651 0.118909620 0.119869749 0.111821988 0.136972511  
TRUE 0.738833424 0.762882953 0.780975955 0.753309909 0.773481159 0.742290323  
NA 0.831927832 0.830037797 0.772692131 0.790216262 0.811909894 0.786640123  
NA 0.082558486 0.088250067 0.054465323 0.066546801 0.088409753 0.066277728  
NA 0.706744274 0.714066996 0.748554154 0.602682401 0.712012290 0.755624594  
NA 0.307170736 0.353378811 0.239915542 0.313819966 0.313887815 0.285640674  
NA 0.046103418 0.055028535 0.044924431 0.044120985 0.043743794 0.053695113  
NA 0.103812861 0.106299693 0.104022869 0.089032931 0.069162125 0.163846303

NA 0.037774609 0.038960562 0.037648507 0.032031808 0.034901605 0.054026395  
NA 0.045405414 0.034123126 0.048280633 0.036885229 0.039025730 0.066229631  
NA 0.049420202 0.046781197 0.045590166 0.040415198 0.041977405 0.069532716  
NA 0.279431327 0.314330887 0.228604802 0.263409187 0.275197125 0.274965387  
NA 0.027869926 0.039942295 0.029882653 0.027871957 0.038784653 0.039803854  
TRUE 0.026962439 0.019792191 0.018503888 0.019591962 0.016285949 0.022469222  
NA 0.485300649 0.500231584 0.424959305 0.495213856 0.503771182 0.526795650  
NA 0.646964121 0.742805582 0.755722449 0.731370591 0.775981211 0.815161654  
NA 0.058311196 0.050235016 0.049118754 0.054500260 0.037964103 0.053275570  
NA 0.038426130 0.037976340 0.034505183 0.041824800 0.038412174 0.052797708  
NA 0.841549204 0.834665121 0.799349937 0.779566295 0.794865223 0.736289393  
NA 0.048498324 0.036689557 0.028535794 0.030693061 0.035454989 0.047616540  
TRUE 0.047592579 0.025660039 0.037331348 0.035901186 0.039227684 0.043884551  
NA 0.056380196 0.053922281 0.066409622 0.053440631 0.048900746 0.076941478  
NA 0.737707235 0.774137633 0.760363511 0.782504210 0.766052958 0.729438887  
NA 0.078844371 0.107252908 0.063422063 0.042903898 0.065733257 0.120899965  
NA 0.562859314 0.572200211 0.511737682 0.461213062 0.531749175 0.538982180  
NA 0.106836105 0.076119329 0.098332723 0.104559274 0.078338877 0.140675177  
TRUE 0.082954659 0.122689074 0.053209874 0.075452854 0.045352545 0.087104780  
NA 0.310520744 0.318699970 0.284927329 0.340360709 0.255246454 0.355416464  
NA 0.024477201 0.027743412 0.019368289 0.029155778 0.019119007 0.023189932  
NA 0.037156757 0.048759462 0.058260671 0.057850840 0.065796566 0.056671780  
NA 0.579149843 0.658055659 0.631731643 0.473926693 0.596793601 0.630074128  
NA 0.850943324 0.912837546 0.881757201 0.859969166 0.872425931 0.856506842  
NA 0.723815200 0.759280289 0.702964625 0.684536631 0.637439098 0.667796787  
NA 0.126206027 0.116409448 0.108523669 0.106428099 0.069669307 0.086007843  
NA 0.492285170 0.507969031 0.414857177 0.425628433 0.451572528 0.455059755  
NA 0.424358535 0.404566775 0.314251662 0.348229678 0.376238600 0.446506966  
NA 0.026712250 0.026634733 0.024017644 0.031118650 0.025601526 0.038778662  
NA 0.490616655 0.552891985 0.516850510 0.480550780 0.450644185 0.507222504  
NA 0.031210600 0.034738135 0.014758931 0.018722597 0.024636367 0.033843011  
NA 0.067334020 0.074250502 0.047186377 0.084507854 0.059949188 0.077264849  
NA 0.045286758 0.055766642 0.046597425 0.035724801 0.037813760 0.047753406  
NA 0.047978274 0.040129320 0.032310633 0.040168675 0.038347226 0.046884928  
NA 0.068526383 0.087038179 0.056342064 0.070346979 0.062920113 0.063433327  
NA 0.157358520 0.185626071 0.148935868 0.129596982 0.203628487 0.175084543  
NA 0.024818129 0.028876129 0.028812556 0.039889632 0.029642036 0.027314314  
NA 0.062275284 0.053389395 0.051045998 0.044654179 0.048368496 0.048457869  
NA 0.631426479 0.635955515 0.601103005 0.562201072 0.546544836 0.506143818  
NA 0.177300362 0.295725617 0.208442919 0.233914063 0.256355400 0.295812637  
NA 0.039358155 0.035099057 0.033265544 0.023069564 0.031294626 0.037263859  
NA 0.334008151 0.376112100 0.291931059 0.280108777 0.308875239 0.298084234  
NA 0.028001413 0.026042270 0.020265974 0.027007786 0.036880872 0.037751599  
NA 0.036339012 0.032639966 0.027023977 0.023751809 0.020362573 0.032630182

NA 0.033964191 0.029192152 0.028947048 0.035126760 0.033417437 0.034952552  
NA 0.031751511 0.045609162 0.032335916 0.034677772 0.036052711 0.041034026  
NA 0.493142926 0.624725224 0.431692696 0.451806260 0.481866124 0.524479279  
NA 0.848384721 0.856893410 0.824925570 0.820734734 0.839813907 0.802812432  
NA 0.438677349 0.451610361 0.411537026 0.409729908 0.418650792 0.465992674  
NA 0.027366758 0.044432910 0.020810074 0.033764345 0.025098828 0.054009175  
NA 0.051024553 0.040808657 0.042549672 0.040722019 0.053919362 0.043544651  
TRUE 0.489241626 0.526184585 0.509988807 0.523485953 0.540165581 0.571850051  
NA 0.050046035 0.050173604 0.054555565 0.045766533 0.045335120 0.074671675  
NA 0.091001801 0.074761328 0.117639387 0.099513845 0.159914826 0.108414947  
NA 0.293689313 0.474003376 0.408697423 0.408716480 0.453520237 0.465297320  
NA 0.055909383 0.054659559 0.061612750 0.052509620 0.052234645 0.073799743  
NA 0.083099079 0.080915426 0.072768480 0.067383200 0.032137618 0.066136207  
NA 0.039899408 0.038390126 0.041955709 0.034453356 0.028208153 0.045202912  
NA 0.098088529 0.086041560 0.058540749 0.082934476 0.052472188 0.060715079  
NA 0.042316645 0.026081450 0.021894229 0.025870044 0.026901867 0.026840930  
NA 0.263931218 0.312629237 0.211189913 0.208280845 0.228717348 0.242254051  
NA 0.341731786 0.364725107 0.292903936 0.260188273 0.213035586 0.208962158  
TRUE 0.107105794 0.149158561 0.106979147 0.124387086 0.128547661 0.143897945  
NA 0.020617024 0.016841252 0.026550328 0.021417036 0.020598259 0.028182761  
NA 0.048762802 0.052543370 0.045563487 0.048590330 0.037698879 0.041240375  
NA 0.845548331 0.852939983 0.824396535 0.857071530 0.853797858 0.841543928  
NA 0.024931104 0.022452835 0.034866815 0.027598348 0.021857583 0.034458878  
NA 0.865488430 0.892127150 0.867061046 0.881785347 0.862348476 0.840001929  
TRUE 0.151283908 0.147276763 0.132167402 0.153603192 0.123156758 0.142137212  
NA 0.845647258 0.895762970 0.759779353 0.891441950 0.918725758 0.886951868  
NA 0.059101890 0.040250204 0.042161972 0.046603519 0.039458394 0.052223836  
NA 0.619169013 0.620317940 0.549157067 0.529257196 0.674483593 0.532407308  
NA 0.017181281 0.013728276 0.015201711 0.013901363 0.015415904 0.017853571  
NA 0.023772999 0.014451721 0.020330850 0.019963173 0.017236682 0.026342583  
NA 0.621411380 0.742303257 0.655368849 0.730547173 0.839400528 0.738740554  
NA 0.840651712 0.853285236 0.820408833 0.847435304 0.824029176 0.798973977  
NA 0.031990112 0.034900999 0.029979541 0.033479458 0.032982116 0.047841443  
NA 0.874942655 0.892234621 0.861950404 0.855929209 0.868942503 0.855764066  
NA 0.035002988 0.034246967 0.040984652 0.039490928 0.035310006 0.054652607  
NA 0.026312207 0.030021620 0.027763283 0.029461808 0.024350667 0.033369096  
NA 0.035632929 0.019999065 0.019510340 0.024748361 0.024293209 0.024616704  
NA 0.024169183 0.016257979 0.018332506 0.021460595 0.016429888 0.026804705  
NA 0.028192403 0.037469744 0.033118822 0.027945250 0.025689754 0.041817464  
NA 0.044432718 0.041259958 0.032579566 0.037644225 0.039142969 0.044614985  
NA 0.046543197 0.037738431 0.031308994 0.038839722 0.031342663 0.049925206  
NA 0.492304346 0.514954693 0.454325189 0.474309417 0.479328017 0.461674446  
NA 0.858925426 0.893278143 0.867046895 0.879523308 0.877595724 0.883784643  
NA 0.779233799 0.761537538 0.728151039 0.664409077 0.738424682 0.698741826



NA 0.201532545 0.274946483 0.211721461 0.154225572 0.213592974 0.232172490  
NA 0.157764811 0.136625551 0.136867769 0.101619786 0.092122652 0.081314419  
NA 0.149052837 0.112792056 0.111699540 0.084610052 0.071063022 0.081104839  
TRUE 0.678911622 0.713263045 0.661853178 0.716462847 0.760706811 0.706078994  
NA 0.752764879 0.829817088 0.710105838 0.727756049 0.701998988 0.737693320  
NA 0.215639240 0.174405085 0.190520691 0.242367370 0.294410516 0.185783634  
NA 0.088189316 0.092168247 0.059359548 0.063385605 0.058752624 0.068088570  
NA 0.593810283 0.635207096 0.589155659 0.581222708 0.545735250 0.605120001  
NA 0.493786282 0.506398717 0.502737384 0.469421222 0.449851383 0.493370478  
NA 0.200263051 0.221524090 0.192334176 0.246306991 0.249522200 0.247484498  
NA 0.339225825 0.196680134 0.403732104 0.175999805 0.425547315 0.219565069  
TRUE 0.042774945 0.048239469 0.036880214 0.032179542 0.028556503 0.052652133  
NA 0.964070754 0.955585084 0.925301094 0.966163643 0.951657929 0.958467385  
NA 0.287361795 0.338465110 0.282159791 0.246365171 0.265568518 0.226900492  
NA 0.018227038 0.022591813 0.019642475 0.025313483 0.024653621 0.029677052  
TRUE 0.505683130 0.584691644 0.481144852 0.463952827 0.562759416 0.423336336  
NA 0.049545676 0.067162075 0.168774591 0.039750422 0.145853585 0.088340561  
NA 0.027867873 0.026852651 0.040000263 0.028977098 0.037902578 0.052027945  
NA 0.061551893 0.064270369 0.067849779 0.043146407 0.038161957 0.093949650  
NA 0.524682174 0.638409569 0.666151954 0.660447816 0.655444383 0.643876551  
NA 0.920502961 0.914222370 0.896049608 0.930068794 0.939484681 0.865544812  
NA 0.064558506 0.097106609 0.051132823 0.067465380 0.071929867 0.075828665  
NA 0.028483240 0.036729217 0.030040608 0.028828346 0.036584814 0.031915785  
NA 0.055281307 0.054729098 0.045470122 0.041736050 0.045989234 0.055429310  
NA 0.159657015 0.195022674 0.124143085 0.119992130 0.128273910 0.135577877  
NA 0.682423271 0.710612977 0.658545369 0.562316097 0.645579847 0.616767036  
NA 0.207282382 0.229645049 0.203368216 0.169367642 0.184041482 0.170213256  
NA 0.579976574 0.636200601 0.555223807 0.592947907 0.578657180 0.578490458  
TRUE 0.095602498 0.080339574 0.070846076 0.066879391 0.066270535 0.050624172  
NA 0.049740999 0.042956142 0.043641519 0.044296749 0.045934089 0.045469464  
NA 0.033998898 0.037275502 0.036731804 0.037515844 0.039689800 0.035627532  
NA 0.290606882 0.286115708 0.236210639 0.239383500 0.232162446 0.249318016  
NA 0.809852276 0.779526850 0.855955653 0.797216756 0.835657821 0.800014486  
TRUE 0.095804709 0.114772148 0.093660628 0.101500073 0.093369022 0.095180978  
NA 0.697097826 0.694244736 0.640544903 0.702676653 0.574102106 0.626346331  
NA 0.027968080 0.020501608 0.023168285 0.022339365 0.018997640 0.025434018  
NA 0.069407055 0.073499590 0.065292192 0.065953422 0.057920276 0.101437704  
NA 0.058204979 0.054409135 0.050430091 0.049527058 0.021981517 0.045420094  
NA 0.559766280 0.567214874 0.483572784 0.536500144 0.545439166 0.521059010  
NA 0.024286725 0.019976666 0.014608160 0.028173846 0.017348077 0.023591458  
TRUE 0.054413993 0.069130412 0.056654818 0.038553852 0.059267550 0.072257755  
NA 0.100612527 0.101152731 0.116144764 0.110203599 0.098947772 0.172322679  
NA 0.657181283 0.707273041 0.626919116 0.546390541 0.592799084 0.516856179  
NA 0.081268835 0.069713097 0.059925697 0.060787391 0.046302641 0.064441206

NA 0.640619166 0.682758474 0.642650871 0.515684427 0.671797737 0.606770072  
TRUE 0.433365436 0.408153784 0.383790778 0.489548541 0.580327458 0.556951194  
NA 0.760177479 0.786450978 0.722801869 0.675266049 0.788995649 0.743465246  
NA 0.044784826 0.032795897 0.035582356 0.038594459 0.038517007 0.034231275  
NA 0.035047673 0.023685535 0.044224678 0.038823029 0.029736199 0.034653728  
NA 0.692761649 0.671756222 0.710128599 0.658957920 0.721476993 0.676866978  
NA 0.182348987 0.084137155 0.093581594 0.136283899 0.155315413 0.108538020  
NA 0.282552733 0.319598216 0.261559595 0.303844548 0.346480888 0.328612836  
NA 0.203762632 0.196483395 0.198074911 0.354482914 0.186103097 0.201772250  
NA 0.051527560 0.054755360 0.041338654 0.043814053 0.051984053 0.059227326  
NA 0.037348623 0.025334455 0.037887533 0.035526473 0.043182988 0.040431474  
NA 0.023176272 0.027896332 0.020102917 0.020926120 0.021208870 0.027332932  
NA 0.064268970 0.064339748 0.087446600 0.074510059 0.061926525 0.107594212  
NA 0.026830869 0.033875887 0.026967934 0.028684490 0.022222034 0.040907760  
NA 0.099222174 0.112550170 0.091793539 0.118870932 0.120209612 0.127274346  
NA 0.149904334 0.133357744 0.100599700 0.075938781 0.040338379 0.097843560  
TRUE 0.028697733 0.025482210 0.020288225 0.032580705 0.021973088 0.026009982  
NA 0.024835324 0.023377839 0.015499273 0.021510306 0.020639204 0.040548306  
NA 0.842171331 0.831823192 0.772132576 0.799779382 0.780565179 0.754385886  
NA 0.884847759 0.915981413 0.873463170 0.877548106 0.892347964 0.868110155  
NA 0.067975973 0.069294570 0.044684580 0.051120842 0.063932086 0.051305939  
NA 0.168763015 0.168123972 0.142565775 0.192407164 0.256654402 0.182923817  
NA 0.039278303 0.033586096 0.031149899 0.032111263 0.043146431 0.035400724  
NA 0.042381088 0.039433489 0.037364913 0.029985688 0.031190556 0.062131720  
NA 0.055174369 0.060636571 0.058952194 0.055690526 0.063792395 0.074168461  
NA 0.053956311 0.067510830 0.049707708 0.042856350 0.037035646 0.064007428  
NA 0.025210401 0.021625213 0.020352130 0.018525418 0.016775058 0.025782145  
TRUE 0.068993216 0.041689701 0.049156314 0.060117885 0.055954015 0.041484160  
NA 0.027015977 0.026132958 0.029392116 0.030822636 0.029966791 0.034502176  
NA 0.031923501 0.018755137 0.023562762 0.033418950 0.029907207 0.037310654  
NA 0.683685060 0.686566961 0.670375823 0.658049117 0.663674055 0.646527508  
NA 0.032800640 0.039246052 0.030062910 0.040920012 0.035504194 0.040553089  
NA 0.032808340 0.029765617 0.025513930 0.025312903 0.022754226 0.034121449  
NA 0.052975406 0.073751009 0.088513762 0.101176782 0.088403949 0.120195861  
NA 0.021947971 0.018386296 0.024163292 0.020612904 0.020507881 0.022110434  
TRUE 0.025441275 0.030905681 0.022261186 0.026833806 0.029728243 0.037052874  
NA 0.112795143 0.097817522 0.090681107 0.096053556 0.081155699 0.115904329  
NA 0.256769170 0.292247289 0.242755561 0.278882446 0.251079218 0.314740775  
NA 0.045337609 0.029675969 0.032406372 0.027499180 0.026507166 0.041089507  
NA 0.102107394 0.083051338 0.079612865 0.103160338 0.116850870 0.084549276  
NA 0.057256409 0.024914327 0.029941878 0.034495365 0.022982676 0.043363871  
NA 0.836917559 0.869048137 0.814487835 0.823098109 0.822533931 0.818446754  
TRUE 0.036202918 0.045606423 0.034775793 0.032213582 0.023063216 0.046293463  
NA 0.439858385 0.493142722 0.538585180 0.434522826 0.120349250 0.446242989

NA 0.821299034 0.856988056 0.754468637 0.833657442 0.813675632 0.843519009  
NA 0.829942425 0.858483832 0.779891175 0.801656604 0.835763743 0.772814643  
NA 0.827590366 0.856623486 0.762563688 0.802618890 0.820939910 0.741797404  
NA 0.062218132 0.062426959 0.051647921 0.053429653 0.055758762 0.057028110  
NA 0.029926626 0.032088471 0.031361371 0.028165712 0.037780793 0.044330767  
NA 0.362303418 0.361992133 0.308213695 0.376635247 0.338619037 0.347528115  
NA 0.688966898 0.703238679 0.669584643 0.615556903 0.696596784 0.624909607  
TRUE 0.068373430 0.068484504 0.062047325 0.066737789 0.075242335 0.076785445  
NA 0.023149000 0.020003766 0.020020780 0.018326777 0.021229340 0.024869915  
NA 0.815990844 0.805797010 0.701427928 0.705387344 0.673232993 0.732964546  
NA 0.633999661 0.613489061 0.550151026 0.510975381 0.511474532 0.566556264  
TRUE 0.025551906 0.031844564 0.024449000 0.034445335 0.032836446 0.037555843  
NA 0.040733077 0.050120945 0.053010810 0.042909967 0.027742944 0.135606440  
NA 0.049909648 0.049296566 0.049958170 0.051864875 0.052842677 0.060172776  
NA 0.793818661 0.818345436 0.762399444 0.772049975 0.910890184 0.822370507  
NA 0.026583187 0.027159597 0.017648715 0.020335926 0.015929970 0.021317713  
NA 0.105886294 0.078147601 0.125784176 0.156201244 0.132083705 0.119295647  
NA 0.863394989 0.895601809 0.879789921 0.846042064 0.863307065 0.825146939  
NA 0.045231854 0.047206138 0.056839332 0.045774310 0.034803427 0.085658570  
NA 0.789863926 0.807520797 0.770167527 0.814629162 0.789903292 0.734556511  
NA 0.030810391 0.028463634 0.024748454 0.021311765 0.022921189 0.029625421  
NA 0.052029684 0.064567684 0.064451920 0.050740558 0.045798622 0.081478665  
TRUE 0.077790590 0.082967596 0.089736641 0.085770397 0.063856584 0.137576148  
NA 0.032949170 0.038723542 0.035312721 0.035991060 0.032382242 0.041695145  
NA 0.020941912 0.016987035 0.018057053 0.015600137 0.021891513 0.021904112  
NA 0.821285784 0.862979059 0.858669312 0.856526974 0.879567455 0.844265410  
NA 0.705541756 0.799895716 0.792065150 0.742516338 0.783107651 0.756859229  
NA 0.448543896 0.480806407 0.416574393 0.413807247 0.398783501 0.411245028  
NA 0.081078366 0.060226257 0.063919591 0.067936441 0.053008862 0.058955870  
NA 0.051398075 0.032446322 0.037287668 0.044919061 0.034190725 0.052519091  
NA 0.167543495 0.150994775 0.131490473 0.137785066 0.121949529 0.092242589  
NA 0.021228218 0.016352320 0.018707098 0.019891133 0.018570515 0.033491774  
NA 0.539338770 0.562371489 0.450385873 0.438351126 0.483990376 0.413898112  
NA 0.085893249 0.096201323 0.056115480 0.107075734 0.089271037 0.091289546  
NA 0.767826161 0.893409258 0.703686216 0.856241585 0.908154335 0.786860076  
NA 0.377488968 0.426045328 0.489265614 0.544564810 0.492183597 0.369096321  
NA 0.032257201 0.044179800 0.028105039 0.030783647 0.037229164 0.037612605  
NA 0.038076951 0.038461334 0.050499999 0.044582509 0.034101801 0.065206257  
TRUE 0.191079090 0.235610421 0.164440150 0.162767028 0.279183620 0.200615225  
NA 0.551925404 0.616211169 0.495825425 0.504528542 0.590728361 0.617349756  
NA 0.025550570 0.019221810 0.024485062 0.024811261 0.024224956 0.027929170  
NA 0.034499399 0.034947399 0.038401929 0.032845499 0.039124322 0.037861896  
NA 0.030746682 0.039846535 0.027300228 0.042971746 0.025803757 0.065961521  
NA 0.031223586 0.031689248 0.025939419 0.027834119 0.027196836 0.039516620

NA 0.025742104 0.023516515 0.022554583 0.022176302 0.024043426 0.025992527  
NA 0.026723334 0.035927173 0.031863641 0.029099478 0.026778303 0.039412729  
NA 0.023182776 0.017230291 0.013172905 0.015932600 0.013661660 0.022870923  
TRUE 0.106112236 0.060452865 0.085674455 0.073711876 0.076659657 0.092453513  
NA 0.763612015 0.429581245 0.772503696 0.830377565 0.870202870 0.455386729  
NA 0.037631948 0.035229736 0.033625072 0.027572480 0.023535419 0.039253873  
NA 0.453313904 0.585376742 0.523205908 0.424153813 0.483835842 0.492132819  
NA 0.071961792 0.071509304 0.071549720 0.078007192 0.098627469 0.104587285  
NA 0.063953394 0.064681160 0.059425380 0.063096530 0.056165235 0.084952137  
NA 0.425777997 0.529486198 0.439462911 0.393918014 0.461606075 0.442918288  
NA 0.553380576 0.606787675 0.532833786 0.542933296 0.545964958 0.541982619  
NA 0.856059125 0.874087509 0.792830742 0.864584347 0.866250165 0.841448218  
NA 0.314652177 0.350696490 0.263575617 0.240206923 0.226157277 0.223961386  
NA 0.450856608 0.499940996 0.334173521 0.398765712 0.549463423 0.447385366  
NA 0.644710052 0.655934379 0.464809922 0.574146385 0.593807573 0.577102158  
NA 0.024088909 0.020894201 0.020594097 0.028502321 0.019718533 0.022210375  
NA 0.032533372 0.032401748 0.026610134 0.028094952 0.026236343 0.029145905  
NA 0.054188278 0.038781477 0.041586949 0.067645701 0.053086590 0.064772955  
NA 0.062102039 0.046022977 0.063872493 0.043423372 0.037582006 0.057830037  
NA 0.805451105 0.752153182 0.758431189 0.692510845 0.727763669 0.699892405  
NA 0.021377586 0.025196679 0.019312287 0.023014976 0.020827823 0.032883265  
NA 0.858703853 0.861409110 0.878566690 0.843820138 0.858640814 0.828162799  
NA 0.033998376 0.035360389 0.029044737 0.021590534 0.023184831 0.035889804  
NA 0.027577233 0.024951159 0.025854261 0.023316194 0.021092529 0.030287985  
NA 0.045802143 0.043032077 0.034160997 0.030752216 0.031809604 0.039261334  
NA 0.040741802 0.041925908 0.035299128 0.069823073 0.119420560 0.065996519  
NA 0.031830349 0.016941997 0.020537871 0.023931558 0.023193667 0.026787164  
NA 0.064245638 0.053952851 0.048283489 0.071955613 0.075512479 0.055662123  
NA 0.055810869 0.050363702 0.037079935 0.032489631 0.027876263 0.064413634  
NA 0.474300583 0.496362772 0.425220359 0.454792330 0.603949739 0.542164774  
NA 0.898344593 0.896601002 0.869679756 0.878194258 0.888033446 0.813246162  
NA 0.501693370 0.586360385 0.553165693 0.566107914 0.492301693 0.502818159  
NA 0.460029051 0.457671388 0.388453249 0.446098968 0.476103553 0.443355916  
NA 0.785084304 0.755285591 0.615953385 0.661664243 0.799803794 0.839775099  
NA 0.808066096 0.907477081 0.832873048 0.783153361 0.852128731 0.841958856  
NA 0.897462396 0.933810578 0.899928970 0.896311338 0.909206880 0.894999930  
NA 0.385182154 0.419777554 0.350930973 0.389465465 0.470780007 0.457656026  
NA 0.040901099 0.056428330 0.047318027 0.038755991 0.039469573 0.100049484  
TRUE 0.363033887 0.352869676 0.295959158 0.358887061 0.527525465 0.422519970  
NA 0.407831016 0.508962129 0.337627164 0.362201006 0.342016442 0.347161046  
NA 0.226805505 0.278953820 0.236538172 0.327965494 0.289760191 0.252474977  
NA 0.127748862 0.144358036 0.105504819 0.124291987 0.130849821 0.141804743  
NA 0.835725427 0.860443868 0.843767478 0.824991717 0.814409166 0.803680167  
NA 0.846297651 0.838025940 0.816516045 0.799974869 0.834601587 0.796373368

NA 0.018745666 0.022246927 0.018368848 0.016314377 0.015431128 0.019348673  
NA 0.042741241 0.040438742 0.031575168 0.038444308 0.029940756 0.050191080  
NA 0.251928546 0.248685853 0.221051623 0.201146720 0.209207893 0.176202413  
NA 0.077549044 0.067827697 0.062996096 0.056987202 0.048989832 0.120551547  
NA 0.050790499 0.040916177 0.037359158 0.049975928 0.041079523 0.048120508  
NA 0.339072380 0.351820566 0.310994335 0.308034745 0.332943416 0.311302209  
NA 0.066875959 0.040876702 0.060446865 0.052265024 0.045952385 0.076520397  
NA 0.023831777 0.021750094 0.020588005 0.021154952 0.020033007 0.029282846  
NA 0.034984080 0.024797527 0.025662633 0.032143870 0.039917367 0.035871885  
NA 0.051343901 0.075858229 0.057300395 0.049774084 0.041515970 0.081953775  
NA 0.017582181 0.016650925 0.017996433 0.017239523 0.018148152 0.021600185  
NA 0.031530572 0.031592313 0.030991431 0.029239497 0.045565407 0.031522259  
NA 0.080811351 0.094524718 0.064236886 0.059622080 0.054401047 0.110851479  
NA 0.079808757 0.107491180 0.080367148 0.077515344 0.116081943 0.071430815  
NA 0.033748754 0.037629129 0.351204071 0.036864435 0.021299837 0.048788677  
NA 0.033897552 0.027303519 0.027664901 0.024143608 0.032447800 0.034817496  
NA 0.043525657 0.054963723 0.032629938 0.050129412 0.042132752 0.042878211  
TRUE 0.624390833 0.680192749 0.619267738 0.647971823 0.764023129 0.675282284  
NA 0.030062745 0.034017454 0.023759091 0.020989366 0.028948008 0.031629739  
NA 0.017662770 0.021435333 0.016489965 0.020220192 0.023494926 0.027309765  
NA 0.064386651 0.069163460 0.070463510 0.056115572 0.064909845 0.052573230  
NA 0.816038059 0.767299146 0.667542868 0.845174837 0.882391566 0.802830716  
NA 0.952134545 0.964630721 0.950773834 0.947843617 0.961044362 0.941991311  
TRUE 0.654278938 0.688767786 0.604136657 0.611636652 0.665031626 0.663831296  
NA 0.059963082 0.051337358 0.047108488 0.049118678 0.052721998 0.072148984  
NA 0.020894091 0.027838059 0.023332382 0.025359802 0.022899883 0.035411796  
NA 0.900339247 0.887477826 0.907962734 0.792468115 0.889678801 0.733912465  
NA 0.045283075 0.048464922 0.037373672 0.051486660 0.045888375 0.040986437  
NA 0.336804328 0.510699747 0.573853689 0.571982219 0.504583189 0.531821163  
NA 0.706967042 0.743275899 0.633492097 0.562085823 0.603220867 0.614572071  
NA 0.838562392 0.837535504 0.789655413 0.817766463 0.856641008 0.795585682  
NA 0.024421466 0.025014538 0.019480746 0.018922156 0.015888227 0.020505250  
NA 0.731778571 0.779750006 0.663187088 0.627586858 0.739666046 0.642737158  
NA 0.018164625 0.020576547 0.017455969 0.025762034 0.019688195 0.027724498  
TRUE 0.686715045 0.675267055 0.704916722 0.655500757 0.681227279 0.604862173  
NA 0.022172465 0.018330992 0.019430171 0.020587634 0.022428294 0.023368453  
NA 0.831722359 0.854713347 0.822017858 0.803103569 0.781775880 0.833898092  
NA 0.039967807 0.036857817 0.036456518 0.035716595 0.045802119 0.038166894  
TRUE 0.080612743 0.100091538 0.060744130 0.054629389 0.050190566 0.052792332  
NA 0.739621201 0.793013576 0.734309161 0.717485612 0.705539426 0.804748313  
NA 0.741289530 0.795422726 0.703670863 0.694979384 0.733257295 0.727748324  
NA 0.796109268 0.835940777 0.764126637 0.785217330 0.799589172 0.702779212  
NA 0.477095964 0.334857415 0.071440856 0.409790836 0.379551383 0.339618977  
NA 0.031385625 0.043246220 0.031441109 0.037081418 0.040313316 0.049200794

NA 0.024043981 0.027811472 0.024422513 0.027493528 0.024598147 0.029331833  
NA 0.038533351 0.085397631 0.036520136 0.057194526 0.112769481 0.064326007  
NA 0.107174050 0.145052024 0.105944036 0.114812581 0.115175792 0.103147068  
NA 0.024990819 0.031342245 0.022505729 0.018761651 0.022499706 0.040179071  
NA 0.095528807 0.104975132 0.083565874 0.082604947 0.068860704 0.082783830  
NA 0.060071395 0.077472285 0.052126533 0.084213622 0.049638286 0.108661354  
NA 0.029605287 0.036820453 0.036783205 0.035420253 0.032867431 0.044941548  
NA 0.133702818 0.136736719 0.122187118 0.120626498 0.116039107 0.139508566  
NA 0.036745991 0.029431752 0.027417888 0.033779199 0.032236661 0.044782672  
NA 0.442786427 0.458296441 0.437002922 0.408094261 0.471031873 0.430963820  
NA 0.024872252 0.021079014 0.022246474 0.022483114 0.027475694 0.036296406  
NA 0.268787528 0.269702217 0.208301447 0.193764335 0.148980591 0.170341290  
NA 0.741630219 0.651173910 0.733122854 0.707094708 0.766092740 0.614434953  
NA 0.068091754 0.105917374 0.064901150 0.043744109 0.034081449 0.099280682  
NA 0.378334011 0.488527350 0.406393273 0.475386760 0.525245287 0.501877633  
NA 0.056197490 0.054465473 0.037268477 0.048897755 0.059310264 0.067528696  
NA 0.028676386 0.026030510 0.029285754 0.023954365 0.035178722 0.034699333  
NA 0.054841949 0.054781994 0.049892920 0.045991640 0.067721877 0.056959329  
NA 0.150456583 0.159583421 0.105737382 0.122270931 0.151858957 0.137633239  
NA 0.025970240 0.027536019 0.023539966 0.022710046 0.023106099 0.034264377  
NA 0.850514872 0.895267483 0.873265284 0.874669662 0.847562472 0.843220741  
NA 0.018333789 0.025440241 0.017771285 0.020766843 0.013077244 0.025374983  
NA 0.035159941 0.038599703 0.019651419 0.030468139 0.030788856 0.029767296  
NA 0.343768234 0.352438659 0.303858199 0.422548807 0.513406030 0.458355386  
NA 0.041085484 0.047495823 0.030563288 0.038549310 0.023243863 0.031002618  
NA 0.384305889 0.425860037 0.349594681 0.368891720 0.370067144 0.367839661  
NA 0.048355590 0.032365373 0.044406245 0.051717889 0.045976760 0.038999901  
TRUE 0.138570619 0.219149254 0.136139622 0.134518930 0.150589867 0.152611359  
NA 0.911303272 0.920017734 0.868797614 0.890091774 0.891129948 0.878268241  
NA 0.026074124 0.020403948 0.013869150 0.013403888 0.019509791 0.022972446  
NA 0.731034332 0.755251436 0.697691949 0.693557447 0.674179888 0.727359337  
NA 0.067629214 0.050742364 0.043973178 0.031130767 0.023672319 0.037401768  
NA 0.027238698 0.040179838 0.028872420 0.024690036 0.024111031 0.037800713  
NA 0.524372380 0.567634602 0.459676440 0.526521673 0.533024500 0.485639967  
NA 0.951979169 0.955904085 0.931235096 0.957020346 0.962189566 0.897683038  
NA 0.052668085 0.047519669 0.035178077 0.035384043 0.045004221 0.054589062  
NA 0.133244460 0.115827859 0.114913272 0.109629590 0.162977506 0.148322921  
NA 0.045175354 0.040476107 0.024958698 0.033263854 0.031851337 0.035712019  
NA 0.049832221 0.054341080 0.048218802 0.041389346 0.040850867 0.075146920  
NA 0.284181026 0.348839746 0.272885309 0.264469764 0.293292184 0.305138190  
NA 0.014395185 0.015451782 0.015274260 0.014642169 0.018586913 0.021961806  
NA 0.440691519 0.471316636 0.392522662 0.274037825 0.274000767 0.313824235  
NA 0.298866931 0.291228566 0.249286510 0.245510878 0.271068655 0.265453337  
TRUE 0.159940529 0.215335038 0.136153396 0.160111279 0.190655838 0.168565646

NA 0.559342530 0.575398654 0.511823134 0.542269405 0.473845568 0.533553247  
NA 0.395909653 0.422459632 0.348366657 0.419207038 0.544788701 0.405926843  
NA 0.289367920 0.298199555 0.327365764 0.296657397 0.346260688 0.307511146  
NA 0.069968705 0.081286375 0.057675676 0.055470091 0.048637999 0.049560198  
NA 0.217645208 0.219210309 0.190092054 0.185849106 0.181035745 0.228092092  
TRUE 0.471883997 0.468239956 0.471003294 0.499244523 0.532518507 0.412750795  
NA 0.045777661 0.051340944 0.053073602 0.051297368 0.039699958 0.058794282  
NA 0.060535726 0.083994217 0.078353232 0.077025106 0.086896890 0.081011438  
NA 0.031667745 0.030362944 0.023035688 0.027968060 0.018863758 0.031961454  
NA 0.052139754 0.056563965 0.059591696 0.049864261 0.053238747 0.058036121  
NA 0.902423662 0.894459424 0.858632451 0.875252271 0.894140656 0.831892767  
NA 0.905781086 0.901095856 0.874602161 0.847330226 0.831531512 0.849012910  
NA 0.043095281 0.040055443 0.027462632 0.025954658 0.031507948 0.036526340  
NA 0.774012077 0.743116569 0.715325024 0.710887428 0.731824731 0.712913155  
NA 0.033161607 0.026017018 0.030151635 0.029532611 0.027152112 0.044362317  
NA 0.019645036 0.028399135 0.021647619 0.017502652 0.013292422 0.035430233  
NA 0.063646579 0.055124024 0.042585344 0.058724102 0.052203103 0.058449951  
NA 0.056183444 0.085537731 0.059709419 0.047112551 0.056052605 0.081998178  
NA 0.252070155 0.244285461 0.281475755 0.231967800 0.191344487 0.368485353  
NA 0.115551898 0.085030392 0.061188898 0.088769280 0.051957669 0.064403174  
NA 0.928429554 0.946275846 0.915819065 0.932702153 0.936359836 0.901469954  
NA 0.858481902 0.872339369 0.849198992 0.845673831 0.820781953 0.813014938  
NA 0.546092317 0.549338709 0.581231853 0.557124243 0.600285215 0.537679858  
NA 0.040320436 0.028988427 0.024426040 0.023720309 0.022657458 0.033764760  
NA 0.579122082 0.631623132 0.602497827 0.556122951 0.574242363 0.684852724  
NA 0.028554610 0.019487224 0.021762434 0.025043527 0.023295107 0.029635209  
NA 0.110368713 0.121871752 0.107092514 0.119901017 0.189608498 0.097158906  
NA 0.024284323 0.013963178 0.020899423 0.014864257 0.016531448 0.019718909  
TRUE 0.048933422 0.031110193 0.036481078 0.032001749 0.034100007 0.044875582  
NA 0.052762087 0.024351002 0.055493844 0.043726666 0.035982229 0.065323334  
NA 0.830673711 0.819485638 0.840408152 0.836051561 0.852178138 0.849471223  
NA 0.948150686 0.946198505 0.925469515 0.949014531 0.959121648 0.889433977  
NA 0.052057446 0.047117976 0.039687644 0.040584268 0.040676037 0.064311597  
NA 0.029905215 0.017983793 0.028824307 0.022601809 0.024165243 0.037636903  
NA 0.034570836 0.033414873 0.028847820 0.030728711 0.032323356 0.036444090  
TRUE 0.775905143 0.804570647 0.755952413 0.776249768 0.828654289 0.808665566  
TRUE 0.922433740 0.929158882 0.890957999 0.906674635 0.912882429 0.872066504  
TRUE 0.446341352 0.450980773 0.448601297 0.451198201 0.544234671 0.432655950  
NA 0.503664422 0.481009830 0.524848384 0.499801760 0.473129017 0.469427807  
NA 0.052637260 0.034655290 0.036375647 0.047414244 0.044459289 0.044622721  
NA 0.265824205 0.251791849 0.145648553 0.188448841 0.293004443 0.221356704  
NA 0.049911033 0.027652592 0.019998941 0.033881987 0.031140657 0.034203577  
NA 0.535400877 0.583682774 0.491418327 0.477869640 0.501305161 0.515496906  
NA 0.029058662 0.025243551 0.028623160 0.025718038 0.030003570 0.032226472

NA 0.702272057 0.721878484 0.615978491 0.653832793 0.644625350 0.609406891  
NA 0.856046299 0.862576663 0.822966988 0.867512338 0.873298485 0.862184365  
NA 0.040026734 0.034990757 0.033836103 0.035328232 0.036800149 0.052377543  
NA 0.463585477 0.507055470 0.411662531 0.497142116 0.508886827 0.534336725  
TRUE 0.728151444 0.737916162 0.761632432 0.762362337 0.779826285 0.745854184  
NA 0.043107146 0.042512199 0.038356233 0.028246081 0.034161747 0.041035786  
TRUE 0.093636143 0.086323079 0.093655921 0.069051601 0.070950829 0.047388089  
TRUE 0.743114455 0.775566945 0.738284064 0.725495094 0.739072436 0.711873839  
NA 0.014880665 0.014839704 0.016250490 0.018398574 0.017438404 0.021749498  
NA 0.812377952 0.837525741 0.791796398 0.832447923 0.863214756 0.859908587  
NA 0.066553562 0.071737681 0.054556503 0.061223522 0.064639251 0.070835845  
TRUE 0.780522799 0.765041336 0.771230733 0.752449614 0.804434982 0.693024476  
NA 0.763987684 0.834492295 0.754655170 0.671376676 0.784273922 0.706148310  
NA 0.556081934 0.592314327 0.481279686 0.641626128 0.797549094 0.706298874  
NA 0.881005786 0.914691366 0.874127407 0.382418716 0.902203249 0.868944112  
NA 0.030059883 0.029926200 0.035717519 0.032581370 0.030055797 0.050210015  
NA 0.117652312 0.122563203 0.112193990 0.087818529 0.089143905 0.126585589  
NA 0.828706623 0.876609704 0.864744101 0.877994883 0.867136514 0.844605891  
NA 0.061117047 0.059811880 0.050912953 0.056153759 0.051603563 0.055263780  
NA 0.018317913 0.018453112 0.017687148 0.013033560 0.015280960 0.026190919  
TRUE 0.867056902 0.892797429 0.871409626 0.856171295 0.859506110 0.862611903  
NA 0.979105800 0.982017122 0.974426764 0.969636836 0.980388962 0.963121517  
NA 0.051523916 0.050642471 0.037875245 0.043107379 0.036747574 0.042564870  
NA 0.881885221 0.904690823 0.871738206 0.845718862 0.870457932 0.859468698  
NA 0.020479171 0.019756491 0.017366925 0.017052147 0.021415707 0.025551164  
TRUE 0.050347108 0.188041587 0.069810593 0.088265730 0.121672050 0.128578683  
NA 0.037072581 0.046418884 0.047791513 0.031528863 0.047147838 0.045542569  
NA 0.969437737 0.967997943 0.967482456 0.958119848 0.961169808 0.955680246  
NA 0.795467768 0.847906031 0.813162535 0.860331360 0.926851808 0.873541112  
NA 0.362878675 0.387583103 0.326147067 0.362098770 0.379841720 0.328753429  
NA 0.054439093 0.060555572 0.056828812 0.043000886 0.053676817 0.070433141  
NA 0.633595775 0.713691875 0.577977863 0.693627085 0.664070365 0.724016300  
TRUE 0.682346277 0.653824259 0.597781709 0.627956810 0.632341554 0.550642286  
TRUE 0.445273467 0.448443279 0.426831268 0.494102354 0.522378893 0.447146174  
NA 0.037927840 0.034649368 0.036700805 0.034024090 0.024452639 0.035080452  
NA 0.079567390 0.095955466 0.065724494 0.056336352 0.077131173 0.065986393  
NA 0.060936759 0.088385285 0.077695741 0.058283588 0.055044511 0.063530717  
NA 0.027810078 0.025051952 0.021192955 0.024963207 0.019487400 0.037725254  
NA 0.432798289 0.474855627 0.364367324 0.459256567 0.478300915 0.460973609  
NA 0.884892887 0.901631069 0.866941956 0.862775750 0.853034462 0.879067557  
NA 0.044431290 0.050372608 0.042959941 0.027524856 0.027112870 0.051907580  
NA 0.630881297 0.686155956 0.559765512 0.610293158 0.628695065 0.579338508  
NA 0.041351296 0.028912824 0.036837172 0.023578381 0.028100684 0.030108338  
NA 0.252574703 0.335850030 0.233234152 0.214717433 0.274405778 0.271007617



NA 0.162003374 0.177835356 0.142434138 0.126975917 0.088074068 0.096095432  
NA 0.029671339 0.024547360 0.022041138 0.022616491 0.018346936 0.024744869  
NA 0.873909809 0.887807012 0.848101123 0.856279694 0.880351185 0.856419908  
TRUE 0.857785817 0.843919371 0.810307941 0.827964721 0.842514494 0.822181541  
NA 0.134448154 0.122759485 0.107039066 0.112400516 0.208971415 0.114565463  
NA 0.048156577 0.036265225 0.056786004 0.048085676 0.052476403 0.055833020  
NA 0.029332389 0.032404699 0.024926451 0.029151575 0.025361344 0.041858073  
NA 0.029097133 0.025588731 0.029076726 0.022512557 0.036705921 0.030926996  
NA 0.821179475 0.840973850 0.847884803 0.807414733 0.803301055 0.829208618  
NA 0.386581631 0.429550706 0.370320006 0.375193644 0.408798447 0.339174219  
NA 0.036928989 0.030451137 0.028460260 0.031878307 0.030088600 0.052539582  
NA 0.384096054 0.428108297 0.320410114 0.350884078 0.272756120 0.296611513  
NA 0.052776628 0.055133226 0.064868909 0.067682843 0.063445033 0.059560487  
NA 0.153432434 0.155131378 0.117372601 0.137410363 0.086457335 0.111762005  
NA 0.624688511 0.608249370 0.595997443 0.590651510 0.582794302 0.503726747  
NA 0.649097010 0.674217732 0.606659438 0.581834837 0.585685801 0.589194267  
TRUE 0.367568833 0.421982030 0.323207884 0.146330129 0.263195572 0.251157157  
NA 0.131266752 0.124114547 0.110717057 0.119743532 0.116129031 0.102911548  
TRUE 0.064280241 0.061220157 0.074504770 0.048416082 0.147696099 0.050731349  
NA 0.045250386 0.049160290 0.067204101 0.044495382 0.050853931 0.040095265  
NA 0.021238834 0.018351745 0.020785866 0.020149893 0.014757553 0.021052194  
TRUE 0.434392935 0.482830952 0.338153286 0.435034295 0.305110802 0.428892348  
NA 0.058088541 0.070134029 0.072063746 0.059677084 0.041673955 0.054733737  
NA 0.040858122 0.043068687 0.036438648 0.037922509 0.029806516 0.045701474  
NA 0.025927070 0.024688759 0.020821860 0.022256728 0.018589695 0.033076919  
NA 0.063881688 0.081396254 0.053025300 0.070279998 0.059167368 0.076174827  
TRUE 0.347600716 0.358769100 0.287289353 0.314050121 0.342757710 0.297331287  
NA 0.058267452 0.097086730 0.052157777 0.084073323 0.048135271 0.089419605  
NA 0.056522417 0.046399352 0.041112205 0.048855780 0.032200884 0.052357283  
NA 0.129991429 0.140275281 0.096218362 0.079466116 0.080358638 0.086311802  
NA 0.024874680 0.025801116 0.022065851 0.018876045 0.024299830 0.037046194  
NA 0.074194244 0.079689558 0.052399891 0.055620823 0.028869295 0.062419691  
NA 0.394169419 0.414290761 0.334870344 0.352931550 0.340309620 0.321193562  
NA 0.574620099 0.572171114 0.499913340 0.593411805 0.706637053 0.598427302  
NA 0.460429046 0.467097474 0.407668484 0.353112692 0.465704183 0.342768552  
NA 0.816855410 0.835446935 0.794378249 0.815176820 0.787273335 0.867270285  
NA 0.060298168 0.060727925 0.058458038 0.061163449 0.049456929 0.057633444  
TRUE 0.047984765 0.058282068 0.041871321 0.077661589 0.084547053 0.078089158  
NA 0.018292905 0.020137525 0.021419341 0.020420144 0.024912724 0.023157302  
NA 0.169934038 0.178756584 0.148199517 0.145943320 0.150952017 0.167178287  
NA 0.874717672 0.893588301 0.901739504 0.886039834 0.864795466 0.858695962  
NA 0.018115592 0.015272486 0.020736410 0.018169521 0.017258059 0.022373624  
NA 0.019116714 0.017196009 0.015750513 0.018411329 0.021869855 0.020856304  
NA 0.036711239 0.042408158 0.033418932 0.038440519 0.026730113 0.061877920

NA 0.057265096 0.035439628 0.040244956 0.041530195 0.048723819 0.043078901  
NA 0.022769084 0.017381091 0.024010180 0.025572719 0.025799125 0.038832896  
NA 0.024703211 0.036192869 0.031094379 0.032403505 0.026765420 0.029585668  
NA 0.786087211 0.818845982 0.820086520 0.770840976 0.787901778 0.741559364  
NA 0.037443670 0.035202348 0.039509016 0.046066138 0.043006506 0.032233355  
NA 0.821809515 0.798528690 0.750335983 0.819784976 0.830538620 0.780245063  
TRUE 0.804175600 0.822564884 0.806658254 0.825238362 0.822455808 0.799676483  
NA 0.070206077 0.085176758 0.061967759 0.066391723 0.049607125 0.083436199  
NA 0.684046712 0.712682633 0.622973049 0.673732560 0.795805932 0.738279793  
NA 0.037552763 0.025392106 0.021139199 0.026087042 0.019361955 0.032456562  
NA 0.446134542 0.903975698 0.496616272 0.720982958 0.498366071 0.772718081  
NA 0.021668344 0.021705900 0.023657929 0.019342566 0.025912759 0.025592702  
NA 0.049238791 0.047396335 0.040943945 0.041870726 0.030688875 0.045432470  
NA 0.070409654 0.059337592 0.050520468 0.062378138 0.036760477 0.058929763  
NA 0.689114446 0.784800580 0.665354564 0.722620648 0.740578805 0.717619122  
NA 0.024498687 0.018829573 0.013448508 0.021089799 0.018123685 0.019483673  
NA 0.847663477 0.848865964 0.836954339 0.742409620 0.780541850 0.769382234  
NA 0.819048199 0.897939582 0.845041934 0.852043927 0.857989454 0.861602393  
NA 0.033869162 0.031704048 0.021327095 0.035979417 0.025604802 0.029366813  
NA 0.290771003 0.318800555 0.256304045 0.359931219 0.391367441 0.265325373  
NA 0.041190754 0.043577379 0.048738812 0.046114737 0.035371514 0.073329166  
NA 0.032300259 0.042710634 0.040509217 0.045129234 0.032187690 0.052590286  
NA 0.913516902 0.926711589 0.875613162 0.928087516 0.885521946 0.909181573  
NA 0.026508248 0.021624570 0.024947900 0.017421237 0.028464139 0.027088329  
NA 0.732111011 0.734285635 0.704426376 0.670274871 0.664395812 0.625747604  
NA 0.148260465 0.214762235 0.178345315 0.195939188 0.173232794 0.244382542  
NA 0.156864485 0.220750672 0.142775311 0.160133178 0.148764647 0.172884820  
NA 0.092050382 0.107613543 0.085606971 0.096211687 0.068686040 0.101342531  
NA 0.274246556 0.339308822 0.162898243 0.132695478 0.164550641 0.376619743  
NA 0.585835929 0.605154908 0.680042334 0.563829226 0.629835387 0.679853425  
NA 0.032299428 0.032530690 0.030248139 0.032448708 0.029817040 0.044377543  
NA 0.407552298 0.425764172 0.388515507 0.393047241 0.376116295 0.358145433  
NA 0.059353325 0.061862509 0.044452199 0.052484128 0.048060732 0.044254308  
NA 0.050756403 0.031895196 0.027981208 0.038615950 0.031503945 0.039842713  
NA 0.131215808 0.156721580 0.125203369 0.154211048 0.150172890 0.139390798  
NA 0.244323612 0.239449740 0.199179213 0.194048448 0.223238680 0.220940417  
NA 0.706232387 0.773433269 0.714010002 0.682755790 0.703041710 0.777872215  
NA 0.917359639 0.909299191 0.905263530 0.899107067 0.905517349 0.902527654  
NA 0.027082086 0.026563871 0.035796934 0.030336240 0.027012058 0.038776915  
TRUE 0.427318341 0.483386132 0.357295313 0.408770568 0.551623222 0.486729759  
NA 0.102558554 0.103362069 0.056514030 0.054039432 0.064053099 0.096673207  
NA 0.814933576 0.865656516 0.752562821 0.806228235 0.788285280 0.782722722  
NA 0.356281719 0.389231354 0.372884884 0.356988705 0.364804005 0.246205093  
NA 0.568570080 0.664987268 0.586667849 0.647562731 0.693083539 0.764155088

NA 0.254299345 0.287526239 0.239576448 0.277452659 0.246445852 0.294083744  
NA 0.891204876 0.909260607 0.889066180 0.871080187 0.887230182 0.874033867  
NA 0.833378662 0.823776319 0.797740417 0.794135172 0.814153224 0.769909821  
TRUE 0.795956107 0.847130683 0.792316378 0.814357875 0.834962234 0.806221729  
NA 0.031929870 0.031304603 0.029401674 0.028722378 0.029033758 0.038870811  
NA 0.269081961 0.276035810 0.273587730 0.195677983 0.246424669 0.260148850  
NA 0.077480091 0.086973763 0.069469462 0.073974596 0.069486475 0.077650093  
NA 0.032304582 0.026033712 0.040121207 0.030510961 0.040073093 0.033433180  
NA 0.901983382 0.917829060 0.882189000 0.883003003 0.910883172 0.871640242  
NA 0.322706153 0.346175676 0.310031608 0.253329699 0.266696380 0.226525806  
NA 0.050350476 0.054627511 0.046247420 0.041675696 0.047237262 0.058585723  
TRUE 0.129234465 0.131737773 0.114247542 0.159638365 0.311092288 0.163422647  
NA 0.020709376 0.023504389 0.015983763 0.018521020 0.016706503 0.027181929  
NA 0.697868033 0.733666828 0.646689434 0.548325224 0.686163203 0.632150593  
TRUE 0.137622507 0.217365303 0.158413518 0.151824033 0.137076565 0.159834509  
NA 0.603656078 0.725780929 0.617060682 0.669073624 0.735888778 0.681972428  
NA 0.034270039 0.032697334 0.025398270 0.031938576 0.025579448 0.029676181  
NA 0.144852816 0.180840430 0.161817889 0.157213217 0.270386787 0.186223944  
NA 0.076322019 0.065533922 0.067308662 0.051551553 0.030999746 0.074985052  
NA 0.039609632 0.025535198 0.024191879 0.026099746 0.020335132 0.029271928  
NA 0.972705726 0.980591417 0.973273693 0.976085268 0.977794768 0.959899366  
NA 0.145692161 0.123763888 0.128131115 0.182809061 0.182466418 0.157558596  
TRUE 0.502717146 0.538516533 0.517162601 0.570392310 0.475463795 0.552807420  
NA 0.735222521 0.728288405 0.754001383 0.768341240 0.767218525 0.689301216  
NA 0.176604350 0.135170534 0.192644023 0.125105129 0.123517956 0.082920558  
NA 0.275831410 0.236420099 0.202794701 0.218927225 0.244824580 0.225874994  
NA 0.060093364 0.052904647 0.047716273 0.052719055 0.052666496 0.059775348  
NA 0.023034524 0.025410636 0.025754849 0.028762591 0.025502536 0.036525168  
NA 0.156884035 0.087271162 0.079110938 0.066863563 0.076966458 0.163260983  
NA 0.874944263 0.914918803 0.842546183 0.889568032 0.874702466 0.864257914  
NA 0.052203603 0.049135461 0.041638165 0.048058126 0.053727290 0.050700495  
NA 0.055027566 0.048855396 0.037157869 0.049687079 0.049270219 0.055077084  
NA 0.733720367 0.808776787 0.689094008 0.694459852 0.684394041 0.666182316  
NA 0.075113907 0.079875226 0.059605665 0.067424445 0.062321150 0.071822964  
NA 0.526793239 0.554190291 0.478977651 0.444523881 0.495355120 0.457367038  
NA 0.507011936 0.416078305 0.488925758 0.426771119 0.425658772 0.379455996  
NA 0.916490328 0.886326803 0.871516446 0.887985991 0.915762136 0.849154721  
TRUE 0.124436115 0.139032792 0.084042415 0.152483721 0.208384635 0.138108991  
NA 0.663830773 0.690365074 0.601041882 0.502916256 0.537914438 0.513680941  
NA 0.125325128 0.154908493 0.131028557 0.134469198 0.134017692 0.161479817  
NA 0.360763773 0.368732843 0.324523479 0.363381782 0.370770217 0.383713694  
NA 0.652427403 0.622424731 0.625029551 0.652737009 0.626626944 0.632181504  
NA 0.762170086 0.804728358 0.744968368 0.767636813 0.756396040 0.720736405  
NA 0.272946681 0.306028115 0.252966979 0.281837699 0.283431138 0.275827733

NA 0.021378837 0.017385451 0.020108157 0.015692800 0.019825658 0.024235467  
NA 0.060439447 0.057574078 0.082585835 0.047403129 0.085428243 0.066325290  
NA 0.089915920 0.108371414 0.124763111 0.088092327 0.077786338 0.163884233  
NA 0.617532074 0.669853925 0.603376227 0.516156820 0.605068528 0.544453970  
NA 0.427031373 0.505185321 0.446969827 0.446450187 0.489943143 0.497037918  
TRUE 0.216709447 0.262670546 0.212788433 0.208700497 0.177113223 0.198727797  
NA 0.896939662 0.891463070 0.850327847 0.883242525 0.903659501 0.767119072  
NA 0.300929062 0.305439546 0.275169641 0.354783377 0.474945396 0.471991247  
NA 0.042921401 0.033235098 0.037330159 0.041339197 0.044376408 0.053608576  
TRUE 0.800499689 0.844072690 0.735395054 0.762786130 0.767625641 0.775687057  
NA 0.830959300 0.812023246 0.761731170 0.811593228 0.789618231 0.835166757  
TRUE 0.177421815 0.193743599 0.148721199 0.218513828 0.251777438 0.241804298  
NA 0.590681160 0.647031652 0.673379657 0.645221218 0.720094064 0.730557935  
NA 0.782215843 0.745001713 0.924433585 0.750669837 0.828834826 0.755849460  
NA 0.024043886 0.027250139 0.021074015 0.033218220 0.035756538 0.033825225  
NA 0.489753435 0.524691464 0.473439294 0.472363486 0.527285929 0.545405674  
NA 0.042879786 0.041789686 0.024830858 0.034111180 0.033218987 0.058158331  
NA 0.067234508 0.057787819 0.055811693 0.065949406 0.061865496 0.070013659  
NA 0.033392514 0.028135848 0.021546601 0.020025646 0.020424827 0.025097611  
NA 0.571894244 0.611197221 0.551307274 0.540239157 0.622531092 0.637777205  
NA 0.961183328 0.957990270 0.951800575 0.964214563 0.963743200 0.924112546  
NA 0.068954663 0.064679483 0.087563039 0.081545295 0.070595284 0.115499744  
NA 0.573049509 0.613366028 0.561912987 0.570649612 0.627255100 0.567654085  
TRUE 0.162492147 0.192131506 0.150409900 0.178357950 0.141137920 0.152144066  
NA 0.445987497 0.494819074 0.438880308 0.422541825 0.407795129 0.448390754  
NA 0.025128112 0.026304999 0.027398137 0.021072173 0.021868790 0.030181784  
NA 0.779684508 0.851913561 0.735312180 0.856242615 0.926453189 0.867284352  
NA 0.038070326 0.026092230 0.034772469 0.035032298 0.026815667 0.041717075  
NA 0.571781530 0.688080456 0.553777207 0.511679599 0.572210845 0.613807921  
NA 0.055126622 0.048619485 0.046676432 0.055905762 0.059711282 0.045638237  
NA 0.328196947 0.353522274 0.277755746 0.248936843 0.353707386 0.276073583  
NA 0.308609757 0.248775541 0.304344969 0.480274663 0.557188984 0.362958325  
NA 0.037371177 0.046061557 0.032357670 0.038566987 0.026537115 0.082712582  
NA 0.024509862 0.029132354 0.022378425 0.024861652 0.031968553 0.033534051  
NA 0.263524936 0.361331713 0.262565515 0.259642014 0.336119551 0.273778979  
NA 0.018485718 0.020216401 0.019182942 0.020138937 0.018806949 0.022321852  
NA 0.731088404 0.736845431 0.714549550 0.741458244 0.762979172 0.697616212  
NA 0.030205791 0.032332884 0.019645886 0.028060267 0.021161794 0.028239910  
NA 0.657099514 0.707457614 0.568261354 0.682545397 0.795684262 0.684747092  
NA 0.265538767 0.235859030 0.289165151 0.268527543 0.284920242 0.193555995  
NA 0.027433351 0.024653114 0.032745859 0.031676874 0.027377858 0.037626030  
NA 0.022554381 0.020297493 0.029066585 0.023467814 0.020394306 0.032406391  
NA 0.079048942 0.076276272 0.064681468 0.066154461 0.069500104 0.071407804  
TRUE 0.734914345 0.724553797 0.683448529 0.635247985 0.760348714 0.710712181

NA 0.407291919 0.436694282 0.371083806 0.386832093 0.454077635 0.454892177  
NA 0.868276462 0.895907216 0.878250933 0.822044331 0.841812912 0.852954615  
NA 0.487878730 0.489799678 0.436799782 0.433477402 0.566739258 0.490993937  
NA 0.482174541 0.518100540 0.446202161 0.507395344 0.538329232 0.451095541  
NA 0.117733913 0.081432591 0.160186258 0.060352527 0.046113940 0.137407968  
NA 0.545539075 0.560106546 0.465619832 0.470514391 0.480082556 0.509817309  
NA 0.524968840 0.490985369 0.431758930 0.550287611 0.576849021 0.528243071  
NA 0.742681478 0.766424273 0.743967230 0.766705804 0.871448739 0.808486231  
NA 0.372206655 0.433782759 0.313723116 0.340091032 0.391009993 0.395706219  
NA 0.025371361 0.029277266 0.024505169 0.024436318 0.025126546 0.035965150  
NA 0.079494655 0.089791775 0.069208446 0.058116002 0.044455657 0.051662095  
NA 0.033497686 0.047450898 0.037230555 0.045855020 0.040031920 0.051238985  
NA 0.816321827 0.772115386 0.788782988 0.796085578 0.835732052 0.724479308  
NA 0.135349113 0.117288040 0.091488654 0.168625707 0.194583318 0.139733365  
NA 0.694723345 0.776493594 0.699249915 0.713727087 0.763964869 0.655205873  
NA 0.176645163 0.189228005 0.144804156 0.149531257 0.096616752 0.088672837  
NA 0.015391735 0.018632312 0.017794606 0.015715579 0.015413910 0.022609147  
NA 0.369955049 0.376506906 0.238456456 0.295962623 0.386909365 0.315645977  
TRUE 0.306326557 0.351653730 0.279867493 0.260230099 0.325863488 0.321932382  
NA 0.707349761 0.733667904 0.689139611 0.591606638 0.635487062 0.653034607  
NA 0.868045895 0.914975861 0.858250794 0.884440903 0.911515526 0.814486127  
NA 0.038455858 0.031024948 0.039870805 0.040528087 0.028882932 0.058853203  
NA 0.035465610 0.031469238 0.022082291 0.027854577 0.032004992 0.045709593  
NA 0.064864875 0.046357544 0.051814543 0.046070330 0.038490686 0.063858128  
TRUE 0.696162334 0.694018740 0.573383160 0.615672104 0.530349652 0.568351844  
NA 0.478959358 0.461412034 0.463897814 0.480378742 0.494271919 0.473869490  
NA 0.138836310 0.129273752 0.105262198 0.129310404 0.210491516 0.168289669  
NA 0.104092354 0.085594933 0.094528487 0.083875029 0.113936851 0.111615310  
NA 0.048651847 0.047654043 0.038850723 0.030659748 0.028124774 0.039571532  
TRUE 0.193411297 0.202271438 0.184372063 0.187748230 0.187155563 0.174290049  
NA 0.070252287 0.075467749 0.060119961 0.068599747 0.055932953 0.085747199  
NA 0.471494263 0.509133819 0.410016269 0.434459487 0.458512915 0.454796463  
NA 0.032907695 0.028017034 0.036738532 0.037204420 0.028235130 0.042343003  
NA 0.490433605 0.559700337 0.468327558 0.451855242 0.396097164 0.429549791  
NA 0.918644144 0.924995714 0.883089993 0.907903358 0.905215201 0.861755177  
NA 0.867422583 0.899327489 0.891940909 0.903429004 0.896980168 0.899719594  
NA 0.396280964 0.422654394 0.360989646 0.342206743 0.354982359 0.316815220  
NA 0.015453182 0.014297009 0.018852968 0.017195057 0.019112076 0.020974368  
NA 0.851162232 0.879411354 0.806169147 0.877055504 0.801144420 0.848637655  
TRUE 0.030180857 0.046395302 0.032789119 0.041158184 0.022692955 0.048009469  
NA 0.765980919 0.826197998 0.788873132 0.781549359 0.744502386 0.820930478  
NA 0.652936158 0.643590122 0.581785965 0.583221671 0.670727291 0.594792194  
NA 0.049637437 0.050955286 0.070196798 0.056934404 0.050506139 0.115950534  
NA 0.035088565 0.028186620 0.029567324 0.028763035 0.032023452 0.041686984

NA 0.041111037 0.041613849 0.032631376 0.033875172 0.039611942 0.043265576  
NA 0.628757607 0.670448567 0.576222109 0.517454949 0.589535667 0.529826040  
NA 0.963375336 0.973169874 0.967987255 0.966209828 0.962059578 0.962218204  
NA 0.021837052 0.020001194 0.020334614 0.022704322 0.023206316 0.024265365  
NA 0.031185942 0.026068313 0.024520842 0.027180959 0.028244169 0.033325935  
NA 0.891808234 0.893887713 0.849618121 0.881867813 0.915611782 0.761155589  
NA 0.043374095 0.048374030 0.040000857 0.040067777 0.024205381 0.048489654  
NA 0.570778081 0.662079643 0.595250142 0.606422030 0.662583830 0.672588297  
NA 0.042016771 0.036712175 0.034448208 0.031299535 0.037654003 0.046873710  
NA 0.038872162 0.032867062 0.025451476 0.031621405 0.037375649 0.040691658  
NA 0.388677225 0.414830197 0.337740987 0.361484364 0.384080427 0.372500851  
NA 0.044133359 0.034457527 0.036016892 0.035895257 0.035385962 0.050992558  
NA 0.400207421 0.451723553 0.387678522 0.385646014 0.425880608 0.408950947  
NA 0.095875705 0.138921235 0.150683201 0.079060121 0.084468545 0.197050747  
TRUE 0.117618092 0.137998478 0.092448276 0.118517994 0.123440823 0.127890952  
NA 0.346129608 0.354080962 0.319454980 0.282322751 0.325071045 0.328364261  
NA 0.562059684 0.783230054 0.615275206 0.663067440 0.655335559 0.733823077  
NA 0.817826151 0.869065135 0.808101128 0.795424613 0.826876442 0.851699673  
NA 0.319932549 0.313789978 0.247614325 0.241051500 0.183283706 0.209974044  
NA 0.820502757 0.794404791 0.767221719 0.749022792 0.680033683 0.738125998  
TRUE 0.043945220 0.040792126 0.036149662 0.046053242 0.037709828 0.048504252  
NA 0.025465858 0.023568312 0.030538719 0.027738057 0.022804010 0.031813066  
NA 0.046065037 0.061268970 0.057799786 0.049955318 0.051509356 0.089655620  
NA 0.041293083 0.028555899 0.032986662 0.036374595 0.039766687 0.050233269  
NA 0.042076576 0.028825954 0.035523968 0.027262908 0.031675594 0.053088371  
NA 0.263236908 0.357825180 0.211744473 0.220307317 0.183747570 0.183899647  
NA 0.080373969 0.069224190 0.065723236 0.069127365 0.070902457 0.103025445  
NA 0.025840935 0.020897375 0.023993847 0.023619582 0.028369031 0.041527825  
NA 0.173751847 0.099195438 0.104301181 0.107316174 0.166064058 0.054854054  
NA 0.572666243 0.609220125 0.575937462 0.629593457 0.562358972 0.519208678  
NA 0.029151553 0.029921508 0.027303211 0.028807827 0.036203472 0.039900148  
NA 0.904479393 0.933816348 0.913396767 0.914194002 0.881950281 0.894215966  
NA 0.061651406 0.078345575 0.091084487 0.062045222 0.057917209 0.130991561  
NA 0.044092287 0.035226294 0.040009442 0.033003449 0.019389947 0.040372297  
NA 0.590162200 0.677531491 0.603425412 0.543384535 0.569173543 0.557845070  
NA 0.209474186 0.205849627 0.161721084 0.155338119 0.182227153 0.130752981  
NA 0.056744515 0.073509879 0.058439878 0.055184326 0.053531555 0.083775590  
NA 0.307665681 0.331581594 0.345643387 0.393168761 0.280579297 0.328295948  
NA 0.279958434 0.307280065 0.254165392 0.272680440 0.251763020 0.322850420  
NA 0.769013972 0.777893027 0.686922777 0.741648638 0.695742315 0.684961059  
NA 0.033347246 0.034081055 0.041689756 0.038391848 0.043792502 0.055210195  
NA 0.056601374 0.056182378 0.037189599 0.043237201 0.044126587 0.052196037  
NA 0.404272329 0.403717216 0.381660048 0.362541450 0.377745353 0.440639671  
NA 0.769889698 0.739944000 0.798791740 0.769604966 0.824203736 0.771971075

NA 0.023547988 0.021871873 0.046891961 0.042359291 0.037178356 0.036217169  
NA 0.033264358 0.039176578 0.025576814 0.023440274 0.039414513 0.033429080  
NA 0.020585103 0.029026811 0.017928332 0.032548983 0.036463957 0.033417348  
NA 0.030866820 0.029151253 0.034941383 0.036331956 0.024098175 0.031103730  
NA 0.039909711 0.026165129 0.029765153 0.034842756 0.026045309 0.033034727  
NA 0.058695078 0.056309990 0.037454748 0.045303987 0.040430915 0.055283056  
NA 0.049662817 0.056149059 0.041663854 0.035551518 0.037077995 0.057305495  
NA 0.022594357 0.027754480 0.032313138 0.037043134 0.040676338 0.034729948  
NA 0.011649348 0.011609539 0.013499663 0.017331303 0.012560577 0.019477605  
NA 0.331267059 0.339609546 0.306724240 0.392038239 0.278700993 0.351106080  
NA 0.058578779 0.051809321 0.063303573 0.052416004 0.061996677 0.091739328  
NA 0.073607411 0.057244656 0.045493884 0.050328785 0.043102678 0.047861155  
NA 0.039209792 0.037945690 0.038353308 0.026329060 0.024633963 0.044413490  
NA 0.560748556 0.536974520 0.510123070 0.489104588 0.473752631 0.528452086  
NA 0.927275593 0.950431321 0.925382831 0.941129276 0.950662948 0.927318534  
NA 0.793784133 0.813982326 0.662550486 0.641145153 0.573786630 0.503426414  
NA 0.703835285 0.691313830 0.630404090 0.653931997 0.697145226 0.573458595  
NA 0.670318751 0.717375039 0.625049478 0.613789030 0.695288131 0.631256106  
NA 0.903961979 0.919868115 0.870995067 0.834791085 0.816908900 0.828120778  
NA 0.862363366 0.859735638 0.820448059 0.881722201 0.905646980 0.723836506  
NA 0.015192216 0.017745714 0.010651628 0.012494746 0.014062278 0.017172664  
NA 0.949161910 0.957642787 0.932961832 0.956158976 0.966837393 0.909386331  
NA 0.926875434 0.919482502 0.914230260 0.909238095 0.894624279 0.886039868  
NA 0.046256768 0.052826099 0.042472428 0.033367491 0.040630313 0.064488974  
NA 0.032791676 0.022130601 0.021309533 0.031540444 0.032283542 0.025569158  
TRUE 0.420910825 0.454034286 0.425105053 0.483653871 0.518325448 0.433024596  
NA 0.022736936 0.031613533 0.031717252 0.030067821 0.019188239 0.037636770  
NA 0.071732992 0.060152248 0.065782491 0.053931760 0.059408309 0.073901980  
NA 0.056544618 0.066097004 0.049764854 0.057423351 0.053007374 0.071996956  
NA 0.025004649 0.029095395 0.024090604 0.023882808 0.022850120 0.032162187  
NA 0.050439757 0.050683426 0.040902964 0.034514805 0.042685327 0.042320610  
NA 0.028110716 0.025546675 0.018418390 0.020962987 0.023109328 0.027583728  
NA 0.605425244 0.665166347 0.564785003 0.584836384 0.590124496 0.592195687  
NA 0.808132705 0.836923925 0.806220707 0.809581804 0.825694099 0.800406565  
NA 0.056436071 0.050605785 0.057687876 0.035566622 0.045026830 0.105685081  
NA 0.900497632 0.906328137 0.886286499 0.898191188 0.928255141 0.825729584  
NA 0.150477791 0.202593119 0.128279025 0.140670413 0.095758563 0.107370413  
NA 0.677487220 0.757271506 0.724484104 0.770502538 0.795890497 0.646295640  
NA 0.031341203 0.035809023 0.028147293 0.027217907 0.029894069 0.046854450  
NA 0.024751646 0.038523905 0.033200756 0.033061606 0.033263817 0.051516062  
NA 0.325206088 0.350210222 0.306912914 0.312926694 0.295286014 0.343185625  
TRUE 0.627644793 0.602306592 0.597773909 0.602058292 0.670486754 0.536968294  
NA 0.700223620 0.742246974 0.683047064 0.678506649 0.761490158 0.750041898  
NA 0.033090915 0.021752410 0.032506512 0.031165515 0.024157349 0.034641692

NA 0.049009771 0.044301925 0.038617218 0.038161217 0.045964440 0.049853801  
NA 0.426937989 0.433551082 0.383813759 0.411582634 0.412221102 0.385879490  
NA 0.027882189 0.035549734 0.026377643 0.030416512 0.027331646 0.028281153  
NA 0.017850894 0.019161568 0.015558431 0.019691896 0.013120389 0.028268543  
NA 0.477731556 0.504292922 0.426819126 0.491236951 0.500369827 0.505357785  
NA 0.599916270 0.662931519 0.558720929 0.624874302 0.612108160 0.586238097  
NA 0.028515658 0.027691314 0.041655486 0.026304407 0.028361859 0.042828177  
NA 0.718549031 0.750298275 0.619773962 0.671629637 0.691817087 0.650407707  
NA 0.507219889 0.466953652 0.451689492 0.374715722 0.370502820 0.358194380  
NA 0.627761606 0.612632184 0.592619162 0.475214842 0.566040057 0.483125929  
NA 0.061320822 0.058595279 0.052488777 0.065673823 0.067189516 0.059562809  
NA 0.573987058 0.592981748 0.568549468 0.555404653 0.618194858 0.489432034  
TRUE 0.700076987 0.729769179 0.648747049 0.690542778 0.759943184 0.677620506  
NA 0.667193845 0.718334588 0.659212467 0.678827863 0.706645044 0.777705926  
NA 0.110060632 0.128269342 0.095211540 0.128273826 0.098238747 0.121032142  
TRUE 0.166845584 0.202441159 0.159568712 0.141291763 0.151875792 0.206954775  
NA 0.045709656 0.043451281 0.036666814 0.043874623 0.031585073 0.047208821  
NA 0.241427370 0.268491291 0.197365089 0.273160273 0.254815476 0.244134016  
NA 0.337160643 0.351639702 0.310804412 0.260805721 0.251253564 0.256364127  
NA 0.910760169 0.925376903 0.887678314 0.886833742 0.888103400 0.876580530  
NA 0.131590550 0.131297273 0.139372323 0.159965193 0.185467322 0.162874609  
NA 0.036679338 0.051576157 0.028614429 0.038727249 0.036780865 0.077495829  
TRUE 0.112496029 0.121886900 0.084950054 0.083115654 0.069412141 0.083704821  
NA 0.025393064 0.034896108 0.019371100 0.022027073 0.019457047 0.030096025  
NA 0.492720190 0.545913438 0.482602661 0.544749848 0.612336013 0.629028700  
NA 0.735632553 0.753857038 0.658795286 0.699508969 0.689624241 0.748481469  
NA 0.802534834 0.886410743 0.851031677 0.786875071 0.786645764 0.785523634  
NA 0.031152969 0.027950673 0.034232998 0.034138433 0.030306189 0.049284133  
NA 0.028903018 0.039238836 0.039179308 0.037869483 0.055010981 0.039325417  
NA 0.034115246 0.026975216 0.022581905 0.033442834 0.020721953 0.038601107  
TRUE 0.468246186 0.528771328 0.411593326 0.429221964 0.552455084 0.434326980  
NA 0.057340949 0.049314142 0.044555594 0.040827422 0.033355367 0.055066683  
NA 0.040696660 0.028482604 0.047080150 0.036907496 0.030673092 0.049734457  
NA 0.062262576 0.067933842 0.048625667 0.057670248 0.057010108 0.074941841  
NA 0.038200841 0.031230168 0.043496098 0.042283367 0.042962413 0.048108170  
TRUE 0.074888810 0.071146862 0.074038431 0.068621479 0.076260617 0.063170474  
NA 0.034655032 0.028592306 0.024193154 0.030633805 0.016367948 0.035372800  
NA 0.074208344 0.081262092 0.051046171 0.058513402 0.067275512 0.071207217  
NA 0.586503673 0.649172609 0.578161103 0.572062282 0.621131106 0.577166283  
NA 0.236285337 0.269784301 0.198747279 0.207793183 0.241870575 0.237715687  
TRUE 0.055911843 0.058953704 0.044154731 0.057280976 0.059306226 0.060037666  
NA 0.035600239 0.043829296 0.033373312 0.036571306 0.031833352 0.044494355  
NA 0.579759563 0.583918750 0.495896441 0.497759418 0.535610452 0.561827780  
NA 0.033981628 0.034715457 0.026177577 0.031305531 0.042842670 0.040427568



|      |             |             |             |             |             |             |
|------|-------------|-------------|-------------|-------------|-------------|-------------|
| NA   | 0.022991779 | 0.023045666 | 0.022389192 | 0.018788166 | 0.019785460 | 0.031614045 |
| NA   | 0.530097497 | 0.564869891 | 0.497484814 | 0.562302222 | 0.640192682 | 0.567733514 |
| TRUE | 0.881847857 | 0.904696957 | 0.889487774 | 0.876237142 | 0.904969231 | 0.854377683 |
| NA   | 0.019079608 | 0.023057047 | 0.020165366 | 0.027514846 | 0.015429496 | 0.020574033 |
| NA   | 0.383178727 | 0.347820806 | 0.332166793 | 0.240707499 | 0.308878386 | 0.205924667 |
| NA   | 0.296136670 | 0.385575848 | 0.293642802 | 0.342538135 | 0.415454032 | 0.434158279 |
| NA   | 0.169876715 | 0.180174504 | 0.131701555 | 0.172208434 | 0.179128955 | 0.158903339 |
| NA   | 0.043284661 | 0.026080433 | 0.025533792 | 0.023095204 | 0.024887906 | 0.030834589 |
| NA   | 0.055885736 | 0.063202361 | 0.050750176 | 0.050148513 | 0.052027986 | 0.060937171 |
| NA   | 0.487927229 | 0.466395889 | 0.339683027 | 0.425877586 | 0.466997924 | 0.428828801 |
| NA   | 0.276508195 | 0.352330060 | 0.310959467 | 0.242981366 | 0.361850844 | 0.373010670 |
| NA   | 0.206260268 | 0.302216678 | 0.197063346 | 0.172890701 | 0.144872883 | 0.180181908 |
| NA   | 0.876145750 | 0.919553252 | 0.894675098 | 0.866650766 | 0.876950102 | 0.843314345 |
| NA   | 0.027278582 | 0.042413256 | 0.024030329 | 0.027253545 | 0.027668681 | 0.030624588 |
| NA   | 0.414204337 | 0.439292765 | 0.372597986 | 0.386569982 | 0.408622488 | 0.379090312 |
| NA   | 0.923199333 | 0.764941123 | 0.273793268 | 0.876131417 | 0.897900560 | 0.772917462 |
| TRUE | 0.048421003 | 0.042721267 | 0.028237614 | 0.049699497 | 0.044014771 | 0.042995297 |
| NA   | 0.032422692 | 0.030752553 | 0.032758330 | 0.040970339 | 0.024111271 | 0.048284752 |
| NA   | 0.342311904 | 0.358587692 | 0.271724357 | 0.293390981 | 0.299496914 | 0.272806840 |
| NA   | 0.040654252 | 0.037422161 | 0.030470791 | 0.036418795 | 0.049152772 | 0.038436932 |
| NA   | 0.024605391 | 0.030808959 | 0.018177502 | 0.024455527 | 0.022380018 | 0.029133756 |
| NA   | 0.014610734 | 0.014435054 | 0.018059817 | 0.016265140 | 0.013756765 | 0.022679108 |
| NA   | 0.642311474 | 0.637580973 | 0.589113830 | 0.466804456 | 0.571524219 | 0.448422998 |
| NA   | 0.044489582 | 0.045961791 | 0.054255718 | 0.048843447 | 0.042511548 | 0.056290675 |
| NA   | 0.561308183 | 0.618894290 | 0.722071803 | 0.659579974 | 0.648533030 | 0.619515750 |
| NA   | 0.094109878 | 0.055087048 | 0.110497180 | 0.059133780 | 0.083367260 | 0.059443112 |
| TRUE | 0.042054451 | 0.045622813 | 0.024861736 | 0.031276511 | 0.033403483 | 0.033707652 |
| TRUE | 0.482443220 | 0.482531897 | 0.454650772 | 0.449796656 | 0.470484529 | 0.429014912 |

| CONT7       | CONT8       | CONT9       | DA1         | DA2         | DA3         | DA4         |
|-------------|-------------|-------------|-------------|-------------|-------------|-------------|
| 0.110776065 | 0.114396724 | 0.092843854 | 0.149947167 | 0.124632411 | 0.145546398 | 0.194714794 |
| 0.033500195 | 0.030804227 | 0.032908044 | 0.042635775 | 0.047657667 | 0.043116180 | 0.042919521 |
| 0.031322938 | 0.031740319 | 0.038422260 | 0.040982443 | 0.040873383 | 0.054121923 | 0.049377746 |
| 0.031549301 | 0.042192778 | 0.039319249 | 0.042874359 | 0.046324172 | 0.066013349 | 0.052509741 |
| 0.096155815 | 0.121693584 | 0.124016578 | 0.133243674 | 0.221593741 | 0.107406482 | 0.179703778 |
| 0.026372220 | 0.023508480 | 0.025136442 | 0.032346345 | 0.028107800 | 0.032921027 | 0.031091255 |
| 0.024399136 | 0.020218005 | 0.028518757 | 0.026693745 | 0.033090733 | 0.035219408 | 0.037673999 |
| 0.047024712 | 0.042247837 | 0.052241577 | 0.053917705 | 0.062270057 | 0.059922257 | 0.065343144 |
| 0.770877412 | 0.802116306 | 0.724714659 | 0.834809798 | 0.824608679 | 0.847545198 | 0.832491475 |
| 0.022266157 | 0.022670678 | 0.020860744 | 0.022927441 | 0.041932456 | 0.034583483 | 0.041151267 |
| 0.029331109 | 0.027780792 | 0.020291503 | 0.032077658 | 0.028192166 | 0.037243456 | 0.034079373 |
| 0.021085691 | 0.019260214 | 0.023459128 | 0.021115199 | 0.029410248 | 0.024889050 | 0.026671333 |
| 0.034128805 | 0.042656968 | 0.033332591 | 0.046215748 | 0.032052646 | 0.046386532 | 0.061376396 |
| 0.778433141 | 0.841787662 | 0.842551567 | 0.824935309 | 0.869665123 | 0.872488707 | 0.876162610 |
| 0.046266115 | 0.045540290 | 0.047943018 | 0.040693760 | 0.051815162 | 0.060753323 | 0.073413446 |
| 0.020699256 | 0.019381286 | 0.018310939 | 0.024081842 | 0.024289348 | 0.031479724 | 0.028207531 |
| 0.238742105 | 0.177894588 | 0.284862853 | 0.221836123 | 0.289421288 | 0.361610417 | 0.233778968 |
| 0.019824504 | 0.025565234 | 0.022241708 | 0.027428108 | 0.027045977 | 0.040267898 | 0.030954700 |
| 0.109638655 | 0.137423091 | 0.110922793 | 0.145647127 | 0.146735395 | 0.165222561 | 0.174227740 |
| 0.093206495 | 0.131404274 | 0.086711607 | 0.120532598 | 0.145324286 | 0.240916759 | 0.135001832 |
| 0.043931737 | 0.046625852 | 0.052959594 | 0.052189649 | 0.043576184 | 0.075837656 | 0.074377928 |
| 0.566484171 | 0.451845343 | 0.628102141 | 0.758579994 | 0.681177458 | 0.678595686 | 0.636398532 |
| 0.751885110 | 0.857749906 | 0.797732591 | 0.839813304 | 0.833157104 | 0.857676411 | 0.830753113 |
| 0.030251071 | 0.032845783 | 0.035777871 | 0.039254611 | 0.043027387 | 0.047622222 | 0.063353968 |
| 0.033702149 | 0.043203141 | 0.039953084 | 0.041116559 | 0.039336183 | 0.062817532 | 0.044953656 |
| 0.039852368 | 0.033658139 | 0.040017686 | 0.026675308 | 0.036590373 | 0.061634572 | 0.071620520 |
| 0.028340177 | 0.032376413 | 0.027389951 | 0.035198064 | 0.045849048 | 0.051813080 | 0.055439644 |
| 0.526162482 | 0.578961993 | 0.572449800 | 0.569204044 | 0.606596082 | 0.650220410 | 0.632432221 |
| 0.482655429 | 0.459641394 | 0.531523141 | 0.591404953 | 0.630479698 | 0.630820074 | 0.623991531 |
| 0.027143738 | 0.026387904 | 0.025644415 | 0.034752785 | 0.033587090 | 0.048708076 | 0.037299485 |
| 0.027512205 | 0.029008182 | 0.029744551 | 0.029495813 | 0.037043343 | 0.033730667 | 0.036058732 |
| 0.903294209 | 0.897466005 | 0.919993297 | 0.925540661 | 0.796332743 | 0.825121333 | 0.871517453 |
| 0.033780680 | 0.041459293 | 0.035351479 | 0.028519268 | 0.052170723 | 0.064292795 | 0.088805635 |
| 0.401015092 | 0.412123473 | 0.545196274 | 0.517786792 | 0.526733578 | 0.526171385 | 0.540226767 |
| 0.030647623 | 0.024402705 | 0.023781415 | 0.024188401 | 0.040885146 | 0.051213714 | 0.035366299 |
| 0.188175809 | 0.229384614 | 0.225722486 | 0.216275853 | 0.227670289 | 0.257092434 | 0.292404130 |
| 0.031370041 | 0.036041868 | 0.028807599 | 0.036386369 | 0.031879175 | 0.060046822 | 0.056901155 |
| 0.348879994 | 0.390475744 | 0.342277844 | 0.356339816 | 0.470573384 | 0.506801416 | 0.380808268 |
| 0.017830533 | 0.017742792 | 0.020414153 | 0.018961368 | 0.028182807 | 0.028063288 | 0.021725764 |
| 0.038963805 | 0.030583605 | 0.043711986 | 0.046836031 | 0.037396845 | 0.048056360 | 0.048212786 |
| 0.662676117 | 0.690126987 | 0.667893810 | 0.712383090 | 0.755037230 | 0.726360655 | 0.699773157 |
| 0.411208115 | 0.406902501 | 0.467985570 | 0.513899814 | 0.510835213 | 0.473877107 | 0.482198226 |
| 0.058610653 | 0.097302365 | 0.074830645 | 0.072824797 | 0.087298369 | 0.192810226 | 0.087991301 |

0.093102595!0.087620814!0.082650685!0.042869521!0.055923257!0.045071750!0.082214258!  
0.017696151!0.013527336!0.016763305!0.020462102!0.021934055!0.025082685!0.030969469!  
0.055772671!0.043390224!0.054491390!0.047734359!0.061664151!0.075475154!0.077969289!  
0.220413222!0.255788167!0.266963862!0.278726864!0.285196197!0.281144411!0.327356088!  
0.044207564!0.049316342!0.054509108!0.049375222!0.053053942!0.071332626!0.075329860!  
0.176857325!0.154167357!0.253285612!0.206467775!0.279720140!0.385651499!0.240722525!  
0.092951791!0.076733788!0.085427290!0.105121483!0.090150608!0.110102928!0.124200479!  
0.048177310!0.041573314!0.043690778!0.060664279!0.055069698!0.073558911!0.074632259!  
0.068828705!0.066388479!0.068277471!0.068579869!0.077386134!0.094636193!0.098854518!  
0.102137244!0.095775283!0.114323936!0.114415238!0.136064704!0.172094805!0.122772419!  
0.043388657!0.056029689!0.047896874!0.047134936!0.052905115!0.044923200!0.124749604!  
0.026645116!0.028366494!0.029830811!0.038082259!0.031044896!0.032590391!0.052710291!  
0.048926477!0.042643208!0.042824286!0.052756397!0.053304311!0.145838631!0.058394899!  
0.030801567!0.033327689!0.035432377!0.039718616!0.031427817!0.047619313!0.065160068!  
0.344796612!0.330069168!0.400599267!0.383406669!0.392175724!0.446497718!0.435708460!  
0.024787463!0.027368761!0.023333057!0.029205732!0.024744417!0.033915895!0.032284557!  
0.045063948!0.050249692!0.071380705!0.066624769!0.065232390!0.085926673!0.069998034!  
0.024409203!0.029758121!0.033264202!0.030526657!0.034973837!0.053483949!0.044961027!  
0.026746577!0.035492236!0.034199072!0.043038631!0.045858124!0.063803524!0.047590421!  
0.038108957!0.039824670!0.038990729!0.044480810!0.050491194!0.052969355!0.071335386!  
0.027745612!0.033395002!0.031777973!0.036117730!0.029633636!0.048077252!0.039590853!  
0.016465705!0.014907568!0.015797455!0.018672230!0.022732508!0.023515148!0.024846924!  
0.035876068!0.030723829!0.035371514!0.035375458!0.059471579!0.056679959!0.048312744!  
0.042152618!0.041124789!0.035125910!0.041385317!0.049300525!0.119499293!0.055581460!  
0.031439110!0.029320257!0.038328986!0.032243528!0.041798449!0.049887259!0.038847210!  
0.027478125!0.033246658!0.027418022!0.030693181!0.032117030!0.048643259!0.031833832!  
0.037184996!0.037097742!0.034793763!0.032751890!0.045826141!0.089393488!0.067070229!  
0.025290740!0.029720882!0.032739465!0.045823482!0.037106554!0.050936817!0.055282341!  
0.033837680!0.041118295!0.034162759!0.041143249!0.042404881!0.057065435!0.059679615!  
0.434970769!0.550013217!0.492225523!0.559459375!0.568310967!0.522233954!0.633714270!  
0.230273608!0.233847772!0.295549967!0.302926922!0.379067637!0.305201993!0.323797266!  
0.704443529!0.765316746!0.800281238!0.861689566!0.794917384!0.807070533!0.802871525!  
0.034812173!0.036294479!0.034880813!0.036689100!0.049105552!0.070544107!0.049852802!  
0.535838909!0.548473619!0.600650889!0.599825595!0.628082073!0.709315523!0.602326813!  
0.178572959!0.202110578!0.203656058!0.195341131!0.223449477!0.229123138!0.260650104!  
0.015713292!0.014743384!0.013303877!0.017203267!0.017888586!0.021519601!0.021887092!  
0.160471998!0.209307733!0.163384735!0.165755420!0.279552136!0.219283066!0.256147872!  
0.050710877!0.053779242!0.055990026!0.070447266!0.063022758!0.109556014!0.082068664!  
0.041919684!0.037554979!0.028869671!0.035041968!0.045385911!0.067543268!0.034349164!  
0.229775403!0.269778047!0.301586559!0.327225299!0.284791497!0.390525493!0.353229870!  
0.335568346!0.363794427!0.333657481!0.443951841!0.498897567!0.543296042!0.365278705!  
0.042810486!0.049082072!0.041013715!0.047115543!0.056092865!0.058664882!0.058189463!  
0.107862478!0.108889671!0.109191717!0.122142054!0.136659201!0.142302993!0.142507605!  
0.019443308!0.019220443!0.019488077!0.018478710!0.020818637!0.025459194!0.026429870!

0.040061894:0.046211152:0.031264928:0.027221383:0.067990389:0.053099483:0.054960728:  
0.028080264:0.023106003:0.029403488:0.028189933:0.030179936:0.025047125:0.052174389:  
0.014105217:0.015936684:0.016796427:0.017639803:0.023133101:0.023500510:0.023381465:  
0.438311534:0.441210944:0.479122608:0.583125517:0.466855928:0.557710148:0.577821467:  
0.047280563:0.055711277:0.054686961:0.053664393:0.057756272:0.066566030:0.097865089:  
0.023864680:0.022142913:0.025444214:0.025070384:0.030497714:0.034830927:0.034480903:  
0.030077261:0.034705054:0.030360575:0.026294228:0.034282666:0.053555581:0.037620402:  
0.066664001:0.079859884:0.082503424:0.092217063:0.087039919:0.110951681:0.100481486:  
0.766345168:0.808944475:0.814042106:0.851502826:0.842772076:0.866828056:0.834786994:  
0.077550765:0.079300844:0.065034950:0.068855224:0.093950721:0.091973140:0.095371173:  
0.141136746:0.150470173:0.187593750:0.198245114:0.170227953:0.190181269:0.240926234:  
0.030838296:0.045139877:0.043040177:0.044100681:0.052108673:0.044345888:0.069642836:  
0.024013884:0.024487641:0.024708760:0.021969133:0.031104536:0.030883437:0.036079104:  
0.023382267:0.027438424:0.030398903:0.025679396:0.031507948:0.039814142:0.058333410:  
0.082380755:0.074327686:0.099538974:0.105602471:0.095591955:0.107711002:0.165395348:  
0.031168876:0.024350571:0.023884674:0.023657191:0.033507259:0.034872354:0.050564366:  
0.340115355:0.422713268:0.400806943:0.433650649:0.458615720:0.471735038:0.411609842:  
0.017083253:0.016014117:0.014501882:0.019026032:0.016464908:0.019111473:0.022542046:  
0.024519926:0.026683676:0.027318155:0.045037907:0.032966034:0.034678551:0.031811640:  
0.059393552:0.068988232:0.061959383:0.056389468:0.094662207:0.073761751:0.085643870:  
0.052287378:0.055579048:0.054744112:0.054626526:0.056462533:0.079783188:0.049960563:  
0.022293570:0.018874278:0.034318346:0.022078567:0.027430607:0.038625771:0.037511570:  
0.023457461:0.031189005:0.028078544:0.030131960:0.038731451:0.038826570:0.054431431:  
0.042020709:0.059719547:0.037931827:0.053565727:0.052631064:0.068906904:0.066397019:  
0.022991708:0.025909158:0.018649959:0.023234232:0.031255906:0.053625867:0.030778796:  
0.118854160:0.107803339:0.097150134:0.106247113:0.141583786:0.090219275:0.116863786:  
0.052052868:0.065506722:0.039822484:0.068795822:0.065195128:0.070619486:0.101633676:  
0.428090584:0.473718998:0.445381822:0.464556319:0.533001609:0.546389290:0.576361970:  
0.104204178:0.091140007:0.094283179:0.115605817:0.101907544:0.114467996:0.161441874:  
0.026222621:0.024050159:0.026357410:0.033504600:0.033523120:0.035252310:0.026951852:  
0.057543184:0.063374576:0.052097156:0.060432435:0.057622665:0.087362128:0.244881477:  
0.018359175:0.020699986:0.020545537:0.027490178:0.023210940:0.029402826:0.026679788:  
0.341015983:0.390059346:0.467249694:0.419002016:0.533229749:0.486404011:0.473421093:  
0.025214959:0.021681566:0.020829834:0.027659157:0.025667086:0.036819209:0.038728777:  
0.192921359:0.169188247:0.197915135:0.189894120:0.252179201:0.276101418:0.301572327:  
0.031823348:0.026057400:0.030603632:0.043535515:0.039079528:0.039814934:0.046306502:  
0.062399923:0.064877158:0.065255816:0.056168527:0.072705592:0.077435551:0.094320647:  
0.030803026:0.019736373:0.027772070:0.032624028:0.036217354:0.041582270:0.042757706:  
0.088225085:0.154360494:0.105064071:0.131988149:0.120622831:0.253491394:0.123102693:  
0.060049613:0.062193715:0.061334203:0.056312188:0.068042899:0.078911889:0.071232718:  
0.021518699:0.017897061:0.018813150:0.023429132:0.027193461:0.021087432:0.034844214:  
0.042304764:0.059011365:0.050782925:0.044074797:0.050699442:0.083246076:0.070572636:  
0.041241680:0.036066413:0.039329620:0.034595753:0.041283007:0.047713909:0.052564813:  
0.580137760:0.655065198:0.618314450:0.669880565:0.694205989:0.687090443:0.600297999

0.090562522|0.100993826|0.091045535|0.095709422|0.109825570|0.128882053|0.118890232|  
0.052105135|0.048833522|0.056592804|0.047411241|0.055484059|0.058314977|0.063194480|  
0.020115514|0.021296176|0.022380458|0.023774744|0.025383497|0.028922095|0.032668289|  
0.036402331|0.036445472|0.029704888|0.030402998|0.035648688|0.069059242|0.045290959|  
0.041717328|0.042419043|0.037511965|0.048089741|0.058381530|0.085199830|0.059173837|  
0.060520922|0.060619700|0.059090012|0.059904100|0.055017319|0.083794293|0.065581488|  
0.033743230|0.035341780|0.030466824|0.029678857|0.034969099|0.046421955|0.067696794|  
0.049602774|0.077960631|0.047951312|0.054141494|0.071598495|0.140446542|0.077223101|  
0.026291923|0.036959073|0.031394220|0.032680407|0.030042345|0.049634235|0.039673906|  
0.051615663|0.036954431|0.044136868|0.053238132|0.053750908|0.061239895|0.047544721|  
0.036186609|0.034850411|0.036746204|0.038389366|0.042211110|0.062628862|0.041324403|  
0.032295447|0.044583372|0.032900346|0.045545588|0.036054051|0.101051581|0.038618457|  
0.029273221|0.041346567|0.029503860|0.040578599|0.035862938|0.058245437|0.037939444|  
0.027038652|0.028103192|0.029670202|0.036356913|0.035447004|0.031864028|0.034875381|  
0.042654122|0.051040768|0.031910828|0.050351561|0.065345745|0.046085869|0.057715444|  
0.021520540|0.019698043|0.017762387|0.020677017|0.025078271|0.029067115|0.035033597|  
0.026998051|0.025216740|0.027578958|0.029161412|0.031041658|0.037042601|0.034280773|  
0.042076100|0.044446712|0.037338266|0.039925376|0.056581992|0.071372833|0.072008240|  
0.040983159|0.032134767|0.038214881|0.042024127|0.038481798|0.066555003|0.039750925|  
0.021878917|0.019769344|0.021324995|0.031804691|0.026732594|0.024431873|0.033736997|  
0.109405103|0.110685957|0.103053333|0.107622870|0.157293696|0.121898595|0.134023297|  
0.624956459|0.648182320|0.638367196|0.695978855|0.596792052|0.791014615|0.666273775|  
0.062750430|0.057677235|0.067033425|0.062282576|0.070930086|0.049766182|0.088895607|  
0.199091297|0.193175066|0.186000686|0.194718203|0.223686754|0.269170600|0.243791486|  
0.073407572|0.072474764|0.065014275|0.061781367|0.084302053|0.150239382|0.095731679|  
0.032830083|0.032247890|0.027190002|0.030589098|0.030243879|0.041010874|0.047188071|  
0.031478343|0.035945806|0.033215572|0.040545111|0.036899502|0.037385156|0.052134571|  
0.199844081|0.216737615|0.210283402|0.219642403|0.255328636|0.248254176|0.323335854|  
0.033972866|0.040155473|0.041274343|0.042619756|0.043121010|0.070275143|0.053311426|  
0.036495798|0.046227288|0.037702693|0.038811629|0.051460641|0.061707597|0.049761620|  
0.750905709|0.693995672|0.748268367|0.756811320|0.689841151|0.814845911|0.759746703|  
0.029134785|0.029662474|0.030599910|0.027417725|0.043945475|0.062618541|0.041845958|  
0.659458319|0.713354258|0.716113419|0.717665678|0.662918480|0.726957201|0.703181259|  
0.033203401|0.032042741|0.034867046|0.034640512|0.039068628|0.044886085|0.054303253|  
0.051313115|0.047678577|0.046076614|0.049609605|0.064757315|0.148547521|0.069224955|  
0.043269900|0.031575416|0.046287965|0.038372756|0.048829536|0.049881202|0.072022444|  
0.135904562|0.146468582|0.146624427|0.165549973|0.179017016|0.144860564|0.164854814|  
0.764002610|0.847789271|0.736784359|0.832202440|0.796423745|0.861068657|0.873979358|  
0.021263694|0.022703182|0.019502896|0.021258391|0.026284552|0.030394527|0.025534547|  
0.021777949|0.021579922|0.025446648|0.023923260|0.026895358|0.030373298|0.028253641|  
0.560163657|0.628370677|0.640117480|0.713195461|0.657387878|0.642749777|0.659628476|  
0.040273264|0.042416975|0.046082660|0.048275865|0.050350048|0.076672278|0.104258781|  
0.328298686|0.283258496|0.334683565|0.364384845|0.428253385|0.463154907|0.440613124|  
0.032233072|0.039256137|0.033492853|0.036357699|0.044969832|0.057977976|0.038597989|

0.027674307|0.043512136|0.028872836|0.035209450|0.038313404|0.053780294|0.040848855|  
0.370581619|0.420683497|0.421352303|0.433217377|0.501418755|0.515128667|0.395648526|  
0.036881417|0.041073248|0.040540735|0.041563575|0.045907099|0.056820748|0.072869892|  
0.079418143|0.080781372|0.086436914|0.118046349|0.089799255|0.172652518|0.084857526|  
0.022761733|0.015748515|0.022579311|0.021194955|0.023419444|0.030469539|0.029638753|  
0.052722169|0.051281492|0.057740933|0.049821930|0.055896044|0.072357988|0.062514759|  
0.036353338|0.033321871|0.030265951|0.034252290|0.042027023|0.027320951|0.053816535|  
0.023173160|0.035903515|0.022899833|0.022685059|0.075155976|0.041192621|0.035454378|  
0.033584019|0.036814339|0.030636886|0.030111932|0.040055789|0.046465307|0.044632111|  
0.024039670|0.021967433|0.020706200|0.026823409|0.044622288|0.027318761|0.032260153|  
0.032476492|0.038414358|0.040899256|0.039732408|0.040371268|0.052002069|0.075603994|  
0.844535137|0.878389213|0.855448617|0.895690156|0.874176520|0.892004922|0.874425344|  
0.030820040|0.021688522|0.042285917|0.063370200|0.059250570|0.047229262|0.040601755|  
0.037535519|0.038206262|0.042278635|0.049206736|0.045683433|0.056760114|0.047827587|  
0.029991493|0.022459851|0.028218031|0.029374400|0.033937696|0.037801937|0.032476318|  
0.210396992|0.181220632|0.229684277|0.233174823|0.250724945|0.215005982|0.262617075|  
0.036059232|0.043340456|0.033887987|0.045927817|0.037028729|0.065041428|0.053427000|  
0.055012724|0.046735989|0.054227288|0.048027090|0.090443028|0.061426279|0.066930252|  
0.031655966|0.025212467|0.022603731|0.027061822|0.029896287|0.037301313|0.039593952|  
0.049016531|0.032784480|0.031837860|0.038100492|0.041631435|0.071382693|0.051991561|  
0.066941439|0.069866848|0.078742636|0.068932042|0.068725544|0.093522059|0.100882981|  
0.047524962|0.066880934|0.065810644|0.060913085|0.072882999|0.085293742|0.089284041|  
0.349753386|0.354969919|0.335984886|0.357789185|0.418547016|0.347269524|0.419594479|  
0.058742775|0.066293220|0.075380505|0.061059129|0.084171401|0.082195737|0.110349313|  
0.228729779|0.160003255|0.199447958|0.197383675|0.199100795|0.232563333|0.244399584|  
0.022792096|0.030491673|0.025222377|0.028650796|0.035759362|0.039559961|0.035504799|  
0.021730852|0.022407737|0.032129696|0.033238237|0.038027808|0.046258418|0.044854298|  
0.081015714|0.086689719|0.100264779|0.082548608|0.112751835|0.108248184|0.109100433|  
0.030956092|0.035673406|0.033567869|0.035363924|0.034105325|0.026634518|0.036391576|  
0.031238851|0.028185290|0.033392511|0.041434684|0.030690804|0.054195422|0.037960792|  
0.014809558|0.012924887|0.017021754|0.018225757|0.019695070|0.022332275|0.027760361|  
0.034265030|0.036690028|0.037105855|0.041889679|0.041492631|0.050357896|0.052361257|  
0.039339445|0.022059124|0.029791470|0.030849706|0.036794954|0.031119659|0.062239882|  
0.017922955|0.027281195|0.021087746|0.031174330|0.028802521|0.033963050|0.038546554|  
0.481146808|0.438227942|0.454409340|0.498617799|0.529962491|0.531676914|0.496304178|  
0.028965961|0.034406862|0.031051061|0.035800088|0.037447689|0.051829366|0.031363630|  
0.029834303|0.031197358|0.031668444|0.027826313|0.033223001|0.061030728|0.056063131|  
0.023159237|0.029530141|0.025158953|0.029434193|0.033184901|0.040853618|0.045546464|  
0.358912228|0.326185798|0.288243647|0.329175891|0.349051833|0.574218638|0.382372632|  
0.023596807|0.030564125|0.030321884|0.029262955|0.024324639|0.044543806|0.045842143|  
0.020532931|0.021047090|0.023553877|0.030447722|0.028681542|0.026813103|0.032432151|  
0.132960855|0.132957298|0.065871810|0.175324460|0.191159657|0.150194190|0.134997218|  
0.042538659|0.036975236|0.034406880|0.040924262|0.041711701|0.054561613|0.057565350|  
0.056229878|0.061546095|0.054835652|0.051592391|0.063534077|0.085995006|0.091608366|

0.017978096 0.020463759 0.017798165 0.024666089 0.020000712 0.033335323 0.028405787  
0.022137178 0.024235360 0.020669472 0.021776319 0.022085685 0.029431589 0.027329789  
0.108634235 0.112915620 0.131059727 0.129879178 0.142254341 0.122653047 0.179062561  
0.028710220 0.030958847 0.027430036 0.035748282 0.040899748 0.040233975 0.038720598  
0.268113161 0.290837600 0.308317986 0.340963586 0.312542829 0.321505344 0.320617581  
0.082878067 0.106307846 0.112178338 0.099122553 0.100428597 0.106929996 0.128656612  
0.061677220 0.064777453 0.066325510 0.066770903 0.081821394 0.082561626 0.081258124  
0.121606977 0.125371588 0.137419442 0.112643461 0.122621736 0.100708950 0.187846754  
0.242302584 0.257321298 0.258040451 0.256372119 0.328128002 0.291614481 0.308750698  
0.070763491 0.055253768 0.067481653 0.099517627 0.140774316 0.054715397 0.090664452  
0.163953336 0.202328973 0.174834404 0.181934557 0.210517271 0.198095745 0.220917967  
0.024965211 0.035172476 0.026496168 0.019735773 0.052081059 0.058055398 0.034862170  
0.236219551 0.227135096 0.267435290 0.273018712 0.283030661 0.324009375 0.332778822  
0.028830282 0.031210909 0.035801732 0.032424390 0.043736631 0.045277103 0.051014157  
0.063680431 0.047529344 0.055565881 0.060193361 0.056236963 0.078903880 0.095934445  
0.603945041 0.590468033 0.594726563 0.625063960 0.630082497 0.670997084 0.703966678  
0.016242357 0.018527302 0.017303304 0.027076747 0.022789907 0.022109160 0.024367435  
0.026437746 0.036432397 0.032654550 0.034307552 0.040448375 0.048691564 0.042242920  
0.018889149 0.016812559 0.016466229 0.018825542 0.028910550 0.024116715 0.028766974  
0.760064577 0.789248654 0.801084764 0.776471944 0.872191811 0.788934766 0.801441823  
0.061920595 0.067713681 0.074862989 0.082798804 0.091271897 0.103370907 0.097870177  
0.031359949 0.031824042 0.034376666 0.038775322 0.044610548 0.053909864 0.052764531  
0.041713778 0.034486529 0.042639171 0.044759266 0.041016272 0.038951994 0.054422298  
0.051352536 0.058670200 0.064825799 0.067098165 0.071204652 0.087848491 0.079402401  
0.322974037 0.336087004 0.318368035 0.337447999 0.412701198 0.385719954 0.387275423  
0.038957869 0.046708630 0.042451813 0.047987853 0.050178521 0.058185893 0.048098160  
0.044634430 0.038622606 0.039724955 0.047289965 0.048182286 0.070829854 0.086799735  
0.646462156 0.732534422 0.822325816 0.841032129 0.826288670 0.797902902 0.780320759  
0.780517253 0.793921941 0.844076004 0.844246181 0.831328303 0.867636902 0.851785181  
0.024600480 0.027306456 0.021787562 0.030276620 0.034969748 0.042517056 0.046799012  
0.091486383 0.051845025 0.067856168 0.069333724 0.062491560 0.030711528 0.051544926  
0.136087589 0.142686373 0.121924117 0.180162764 0.163584289 0.115147211 0.218389462  
0.377509581 0.416326230 0.412953232 0.396211168 0.416053000 0.520797601 0.457683364  
0.046457439 0.035042050 0.052935325 0.065674282 0.062945024 0.041580310 0.069749811  
0.668756357 0.761553798 0.729482789 0.685256696 0.781477822 0.830850458 0.681038687  
0.026971402 0.031318910 0.027525850 0.027189152 0.030069513 0.048559703 0.042345424  
0.055924629 0.075442706 0.074729329 0.062196225 0.075067711 0.088175104 0.103260313  
0.059813084 0.060112739 0.071101239 0.055336899 0.072423409 0.102123726 0.091641261  
0.474393541 0.659094088 0.701047345 0.720463775 0.682918214 0.661948267 0.771334842  
0.061208253 0.062729626 0.067429775 0.138595554 0.061207212 0.179221324 0.083784995  
0.048294240 0.043430587 0.051082952 0.053644485 0.050461949 0.040429638 0.067992381  
0.067725871 0.032527315 0.055070886 0.067121010 0.091016506 0.073101971 0.099076785  
0.025328286 0.023613039 0.026502805 0.026772875 0.031215594 0.028451907 0.049626832  
0.650615892 0.683326365 0.716059670 0.785829179 0.759651492 0.743669755 0.776420948

0.122519486 0.144811919 0.149225975 0.139120082 0.085238352 0.103835020 0.087300888  
0.058694367 0.065379227 0.070061247 0.136191879 0.062107165 0.174837603 0.057714530  
0.141978715 0.138970905 0.137111182 0.153573670 0.155094029 0.131372384 0.206783720  
0.046884549 0.046526456 0.046353240 0.048356802 0.063861763 0.076197351 0.084853337  
0.350971655 0.324564475 0.365907699 0.413394868 0.391942513 0.455479794 0.570126312  
0.598411939 0.583008753 0.623042943 0.601324014 0.617132508 0.636984144 0.627162009  
0.040416875 0.063387761 0.060084980 0.058803421 0.051720039 0.158719192 0.072902024  
0.772018842 0.735410192 0.795457033 0.815046034 0.785898563 0.862243786 0.783898520  
0.034311277 0.044505892 0.037742917 0.040062296 0.046565341 0.072670875 0.043061094  
0.124386246 0.118710025 0.148785036 0.139376036 0.156151977 0.125747713 0.154100966  
0.033478170 0.032120419 0.029125374 0.025810067 0.035039002 0.047297508 0.037926035  
0.428943388 0.513904725 0.633571969 0.567262396 0.667420503 0.632465709 0.627002986  
0.032333256 0.045991333 0.041440417 0.034841035 0.040240667 0.064401078 0.045425837  
0.019169522 0.022045292 0.028713616 0.034932311 0.027827722 0.038693586 0.035261131  
0.018942161 0.018171699 0.017788872 0.020265607 0.020510246 0.022880278 0.025670365  
0.582105090 0.745053320 0.752816195 0.798572011 0.768050994 0.795043136 0.855941832  
0.011542996 0.010698524 0.011708538 0.013694985 0.013914713 0.014669760 0.017959966  
0.267406044 0.319111912 0.296864119 0.291092684 0.301335603 0.388668223 0.310633494  
0.737091176 0.681868711 0.749488313 0.756059853 0.838264231 0.841485020 0.761110070  
0.036768008 0.043702666 0.052860889 0.052912801 0.041187024 0.042976809 0.049360086  
0.217662887 0.194500787 0.287578732 0.221810692 0.305618486 0.235545322 0.300401378  
0.034411618 0.043286815 0.036081572 0.040506442 0.027944223 0.035527284 0.044047477  
0.014266255 0.016030137 0.016956433 0.015749748 0.016135769 0.025285251 0.025302950  
0.054634478 0.064514430 0.064836819 0.054767956 0.078445383 0.070416460 0.134004617  
0.042811743 0.050206720 0.054579518 0.050063664 0.055041143 0.071373530 0.070474203  
0.040966975 0.048261665 0.139853079 0.135821901 0.052299490 0.096507277 0.168289787  
0.823488417 0.817464922 0.820574041 0.783708111 0.406022707 0.374336524 0.798675999  
0.018035998 0.023422596 0.018040165 0.020314081 0.019248194 0.027460829 0.026939952  
0.323316308 0.303611138 0.272718798 0.167824273 0.372146894 0.156447492 0.172967092  
0.073446495 0.048537795 0.060612402 0.046181300 0.084909105 0.077235324 0.091743751  
0.079255866 0.089613314 0.074478133 0.089835557 0.097381115 0.099941678 0.114155662  
0.045668490 0.036432891 0.042492020 0.063247577 0.061221356 0.067458356 0.089568332  
0.029911786 0.028193542 0.023150277 0.026832933 0.033253214 0.038915455 0.041370754  
0.051467765 0.046118402 0.049442958 0.048595208 0.049366757 0.086646248 0.069741031  
0.057916608 0.044641949 0.043347767 0.046187891 0.064511524 0.050941659 0.071995445  
0.732244314 0.712616076 0.760144646 0.726619711 0.699106069 0.794164781 0.856828234  
0.038148984 0.035901045 0.039055312 0.040259042 0.036817796 0.046960874 0.061214683  
0.117847379 0.176337470 0.190777111 0.169751371 0.245775489 0.140326287 0.207443581  
0.039318662 0.052293441 0.050264063 0.041451839 0.064528892 0.113213691 0.084275636  
0.039928565 0.046263838 0.055776792 0.062506347 0.045426060 0.085748962 0.076940701  
0.025972257 0.023451902 0.025854102 0.027138259 0.031009142 0.028031462 0.039898809  
0.303194842 0.330387374 0.312425423 0.327499443 0.362495990 0.377561471 0.371287944  
0.021906079 0.027771483 0.030925149 0.029660126 0.027138862 0.046451663 0.032622438  
0.022023796 0.015736696 0.022344175 0.019432518 0.051275971 0.022267637 0.037520643



0.020641710;0.019800727;0.028975821;0.023684534;0.028298060;0.048992216;0.031880272;  
0.108928981;0.116531450;0.121031719;0.153052773;0.131284410;0.162919761;0.155755879;  
0.478414260;0.511610088;0.529920847;0.509863161;0.500485123;0.555337514;0.546240088;  
0.015823841;0.015600374;0.014721494;0.018872973;0.019058070;0.018523910;0.031679970;  
0.460205330;0.436331946;0.474405310;0.444574248;0.525240354;0.569071734;0.475268509;  
0.044260491;0.037627184;0.038627876;0.038976784;0.044267011;0.048868298;0.049575368;  
0.053376569;0.058570532;0.060523362;0.065131905;0.096240963;0.085724013;0.128985428;  
0.040987812;0.045154444;0.047719360;0.034888553;0.056256882;0.081700424;0.055026627;  
0.375954386;0.431549136;0.400729057;0.429751921;0.404678640;0.494430275;0.508423520;  
0.041198547;0.040036074;0.046348495;0.044130806;0.043435868;0.057811575;0.056912508;  
0.047599071;0.057053704;0.065492426;0.069529727;0.057567866;0.081963570;0.087633509;  
0.022906771;0.033012461;0.026415610;0.029983689;0.034474337;0.038090515;0.034057118;  
0.285832739;0.313728412;0.322539492;0.298698807;0.321341638;0.346553282;0.402132288;  
0.026239363;0.021798673;0.025209981;0.030395463;0.031482836;0.032192160;0.040851304;  
0.065370379;0.086505430;0.059747937;0.046348798;0.080968307;0.190811415;0.120202337;  
0.311252420;0.312138253;0.345774399;0.354113740;0.335282846;0.345759241;0.384666673;  
0.020296983;0.021448199;0.015506085;0.027781098;0.020772299;0.026386331;0.028755960;  
0.113453787;0.141841504;0.131220697;0.142081037;0.119881482;0.140006408;0.163833935;  
0.015722899;0.017482489;0.018357946;0.020991474;0.019654307;0.028773665;0.026955704;  
0.043611388;0.033090120;0.033897419;0.042557280;0.047251981;0.069801415;0.041970471;  
0.051874521;0.057927347;0.052489437;0.055100194;0.066006834;0.092675007;0.081524206;  
0.057400572;0.093318275;0.075291363;0.075304320;0.094599832;0.167627124;0.076824343;  
0.033457455;0.033292804;0.035592501;0.029243976;0.042455985;0.042340637;0.045676355;  
0.425786584;0.391536171;0.459370833;0.373063636;0.524560555;0.580727786;0.431800477;  
0.054702842;0.044983817;0.039627531;0.048815777;0.060265855;0.076488709;0.084365271;  
0.718274248;0.823494762;0.769736783;0.804815251;0.752392253;0.824014029;0.779148045;  
0.053838288;0.063675525;0.053166187;0.048704438;0.067603287;0.091732108;0.051240224;  
0.042280590;0.039314633;0.037916739;0.034907162;0.042298782;0.060620078;0.050166585;  
0.321518060;0.405665700;0.358652723;0.358840458;0.413003726;0.439809140;0.377691134;  
0.154769293;0.128223462;0.143737379;0.182319302;0.133907725;0.246661710;0.158990420;  
0.039659288;0.050791554;0.045708329;0.052207907;0.048563172;0.060330428;0.068969688;  
0.024437769;0.023595042;0.027160659;0.028536181;0.026597940;0.045910719;0.040338170;  
0.047866598;0.046475106;0.052819374;0.056697304;0.053772836;0.059083956;0.075635716;  
0.036464627;0.030323039;0.026285297;0.039825517;0.041091859;0.063100446;0.054432377;  
0.045016640;0.052151362;0.039548270;0.052082586;0.052794507;0.072657930;0.074718978;  
0.049048944;0.050214343;0.053773644;0.052954851;0.074284335;0.082983170;0.071081596;  
0.035301786;0.034275671;0.041461530;0.054020373;0.046642986;0.048381206;0.065827529;  
0.029808521;0.024951803;0.029917483;0.025952346;0.045303111;0.029060373;0.039214931;  
0.142630464;0.172517613;0.159118933;0.172336213;0.162127428;0.186040822;0.207589548;  
0.033158063;0.033253759;0.034242178;0.036068737;0.034154883;0.031609849;0.044858512;  
0.126237216;0.108825609;0.139124193;0.153763268;0.120578362;0.120691259;0.155790283;  
0.028484709;0.025122841;0.033462015;0.031645525;0.032091319;0.044091131;0.034187810;  
0.028157119;0.022890286;0.045456886;0.028475280;0.032290231;0.031532990;0.052763390;  
0.025288430;0.024729754;0.021869456;0.029515087;0.035493348;0.030246590;0.035400315;

0.024176746;0.024882712 0.026458579 0.024418165 0.033610390 0.030353755;0.035719396;  
0.042575364;0.028010802;0.025789009;0.033649898 0.043846512;0.047480455;0.082283730;  
0.031062393;0.036916776;0.033192046 0.038005839;0.047572381;0.044510111;0.052501159;  
0.041774682;0.033552772 0.035456113 0.043733279 0.040971178 0.061374698;0.043825858;  
0.347151138;0.386269737;0.329842595;0.378021393;0.431431980;0.490881807 0.398447727;  
0.028237768;0.031643353;0.037028544;0.035706828 0.040801211;0.043945195;0.047979603;  
0.074746401;0.105756104;0.076277849;0.074070570;0.105447630 0.207198060;0.090458023;  
0.042665911 0.044024798;0.050310653;0.044957890;0.051809357;0.121556255 0.060194538;  
0.041894477;0.044710239;0.048322083;0.040318512;0.051116412;0.073672026 0.052532743;  
0.732375462;0.778018055 0.784492670;0.767899840;0.774894989 0.816965566;0.765739622;  
0.520314409;0.457114001;0.491755371;0.528286904 0.595188463;0.498192154;0.545053830;  
0.025292694;0.028177545 0.023259798;0.035888936 0.024075207;0.038002149;0.046854457;  
0.047886752;0.034345668;0.047650356;0.043041521 0.042425462;0.052444139;0.051968942;  
0.229670722;0.291289763;0.323704972;0.295854458;0.281623353;0.373103160;0.343851169;  
0.049065087;0.047162364;0.043850665 0.053533403;0.057632684;0.056289167;0.046640756;  
0.188047572;0.184571544;0.194998598;0.177828975;0.217825572;0.216294465 0.267127434;  
0.024892874;0.036124158;0.026769118 0.030756306;0.029487707;0.035581237;0.030152987;  
0.027097481;0.029610583 0.031150430;0.027351394 0.044383309;0.057063232 0.031914322;  
0.076059534;0.080741502;0.070578247;0.088449309 0.079399483;0.104368686 0.110837908;  
0.025119430;0.020311878 0.025217050;0.023701265;0.030279553;0.042939043;0.027392923;  
0.236251978 0.266551675 0.259657888 0.277180866 0.263403480 0.288636161;0.301058671;  
0.051551017 0.068504122;0.072302262 0.058505540;0.069919365;0.081542925 0.083690934;  
0.035853641;0.043954013 0.039676463;0.036510074 0.051670732 0.055855374 0.048364944;  
0.019849252;0.023012247;0.018169767 0.030019109 0.024395152 0.030512734;0.030729851;  
0.084760336;0.078331454;0.088097549;0.096745132 0.109810136 0.105817069;0.139509352;  
0.392342667;0.373190369;0.383990020;0.410996509 0.499324349;0.428827611;0.423494121;  
0.031329411;0.027442659;0.032944851 0.026609294 0.041320479 0.043002361 0.079235438;  
0.015840969;0.015300536;0.012592079 0.018405599;0.018167145;0.028855785 0.025309848;  
0.770913112;0.856589465 0.802723188 0.788595240 0.832036001 0.887331466 0.818111825;  
0.020553649;0.025497499;0.022051813;0.026393111;0.031677149;0.032353836;0.037514826;  
0.038020396;0.045477339 0.038864429;0.034638611;0.046840389;0.072836882;0.142062608;  
0.016098658 0.017085397 0.015100153 0.015828641 0.019021567 0.018288865;0.023729442;  
0.071677885 0.075433530;0.068677380;0.076950776 0.125337017;0.045137757;0.084807213;  
0.045275171;0.033395242;0.029287817;0.029202288 0.046890045 0.045709656;0.047820687;  
0.032356623;0.042212169 0.039380295;0.051081250 0.039845072 0.051325655 0.034578676;  
0.048206758;0.057174547 0.054682150;0.059126569 0.056872873 0.080607524 0.073008909;  
0.283472993;0.268910670;0.316016637 0.310926665 0.290781214 0.278986778 0.359036390;  
0.037766999;0.063974927;0.047163883;0.047591603 0.054570891 0.064580402;0.065138198;  
0.040836112;0.033686100;0.043721258 0.036819264;0.040376001;0.051623904 0.067613116;  
0.843571091;0.815166296 0.841241972 0.882570942;0.882330518;0.913724544 0.877356278;  
0.342881316;0.361140011 0.418881282 0.412242988 0.428697321;0.428440819;0.421492925;  
0.025457534;0.026874654 0.024464263 0.022500572 0.030826529 0.044814439 0.029452749;  
0.024650020;0.032599698 0.026124952 0.023106587 0.028959021 0.041707886;0.052399321;  
0.022828694;0.033039961 0.027716363 0.027905573 0.034409598 0.050906671;0.028867167;

0.016981064!0.021964432!0.018341120!0.020529880!0.019230320!0.024889325!0.023660489!  
0.742914861!0.725739851!0.792810458!0.759495885!0.761293362!0.829206434!0.760908006!  
0.037902129!0.037699565!0.041322231!0.029931425!0.044671684!0.058213434!0.059644522!  
0.470166705!0.532743547!0.552478949!0.565047788!0.507021024!0.592433725!0.482528491!  
0.306946763!0.374351053!0.433032159!0.440067862!0.452483159!0.395854854!0.381225323!  
0.308415632!0.303258133!0.305227038!0.313131200!0.347946437!0.320547329!0.387378410!  
0.044472984!0.050904797!0.058949863!0.047049929!0.043247961!0.053991458!0.092755873!  
0.033891173!0.045893054!0.041089805!0.033910913!0.034696644!0.054830902!0.043360158!  
0.288719467!0.246878168!0.237404014!0.268903635!0.332324698!0.323574038!0.313290428!  
0.307112137!0.340846945!0.398807229!0.312107241!0.396831132!0.415617055!0.367151980!  
0.840757390!0.833933618!0.790309117!0.866898656!0.853878554!0.868425967!0.838092921!  
0.205774072!0.215621256!0.182021641!0.231955165!0.246770251!0.244770746!0.242502441!  
0.339429971!0.363397987!0.434082897!0.417495632!0.445990144!0.479573861!0.411781289!  
0.075519392!0.090093370!0.089505659!0.104034509!0.080750006!0.153513119!0.110310582!  
0.330367987!0.348721626!0.357951329!0.352684526!0.379556864!0.495696807!0.383317101!  
0.019319664!0.019957201!0.022945989!0.031764142!0.032671540!0.028386557!0.028655625!  
0.022145471!0.022654962!0.030585532!0.023660646!0.029465224!0.043128522!0.039675091!  
0.127514970!0.102418498!0.109542280!0.128738457!0.108569649!0.203058113!0.177891102!  
0.032902064!0.033582385!0.028656826!0.045918715!0.035634908!0.053751853!0.042013714!  
0.560818049!0.599506017!0.657507569!0.576009423!0.562183115!0.617527251!0.711078487!  
0.038469286!0.051637263!0.053935152!0.040597746!0.052174312!0.116435759!0.055513838!  
0.591187836!0.652687160!0.617112589!0.621079244!0.700815329!0.743252041!0.564195413!  
0.028457879!0.037663824!0.030404778!0.032830837!0.029007249!0.047156865!0.057656779!  
0.019838178!0.025214521!0.025083106!0.025521015!0.051176256!0.031693885!0.035064087!  
0.065737881!0.050544663!0.064654949!0.064188022!0.075578176!0.071619943!0.091219819!  
0.589495091!0.632835255!0.581252868!0.594258992!0.679149265!0.650809460!0.666488990!  
0.101944002!0.090821532!0.106304400!0.090592570!0.109210284!0.142239160!0.166168494!  
0.020539967!0.024127758!0.018672653!0.017478066!0.023575871!0.030814497!0.034784350!  
0.235157603!0.249932000!0.248772595!0.268112086!0.267353572!0.262272838!0.320824105!  
0.259606307!0.255226279!0.305694377!0.326691321!0.309289877!0.312816959!0.376550931!  
0.038950620!0.045687290!0.054347058!0.038980140!0.048908800!0.062967740!0.055402838!  
0.088902228!0.110843554!0.061536604!0.081067617!0.061065424!0.063960248!0.067365054!  
0.030385586!0.022348408!0.028168459!0.021778681!0.028315161!0.036338116!0.032254564!  
0.033774368!0.032528385!0.027967286!0.027270786!0.028397607!0.043656060!0.036869920!  
0.034829320!0.053281259!0.050489440!0.047965269!0.044463069!0.059072476!0.046300614!  
0.247055981!0.300711134!0.263484777!0.346150147!0.308329430!0.321218778!0.322387122!  
0.043395125!0.050980898!0.038672773!0.043989952!0.049745646!0.101486721!0.045786179!  
0.022428306!0.022709440!0.026093446!0.029747893!0.042178690!0.037071745!0.031369342!  
0.742705483!0.766456310!0.746312009!0.800679106!0.781512444!0.822082269!0.792482214!  
0.018694383!0.022319524!0.018444971!0.023102081!0.020714303!0.033921501!0.030166462!  
0.026772653!0.031190391!0.029720595!0.031913622!0.026953308!0.042115757!0.041673393!  
0.024959061!0.038677571!0.029398040!0.031697823!0.037984357!0.049794654!0.032907408!  
0.033291815!0.039491767!0.039047926!0.035832139!0.052102030!0.041512333!0.040125531!  
0.042398783!0.045610218!0.031830707!0.035802351!0.039264760!0.045566686!0.051167438!

0.736069962!0.800144276!0.765750462!0.772079393!0.828587124!0.827838602!0.810471945!  
0.040661787!0.044191073!0.042248020!0.033434489!0.050978915!0.055791675!0.058794196!  
0.036316393!0.046034075!0.039079102!0.034474585!0.054497865!0.059552573!0.042108104!  
0.305305298!0.300894361!0.325568264!0.332313602!0.336964386!0.352176079!0.358613260!  
0.816378979!0.851530497!0.861153535!0.817205920!0.858439360!0.842397283!0.839692347!  
0.291900909!0.251393206!0.302645984!0.271242471!0.321674928!0.303295594!0.315356183!  
0.036604205!0.031264500!0.033328345!0.036202210!0.044428110!0.061326268!0.057500060!  
0.028771294!0.042067391!0.033356757!0.030608589!0.044592830!0.059689564!0.051580944!  
0.067414796!0.090340680!0.050032931!0.063736016!0.120660114!0.231676781!0.075964595!  
0.033100574!0.027604573!0.035245592!0.036740606!0.038031728!0.050545010!0.054774538!  
0.384197109!0.343106917!0.453827291!0.418116510!0.404134814!0.407166760!0.450456284!  
0.438516096!0.458570617!0.475995581!0.415676457!0.445539930!0.479481654!0.513419794!  
0.105399317!0.143107921!0.093733955!0.102750158!0.129330738!0.133572257!0.152916314!  
0.029057779!0.020817894!0.035589157!0.025112657!0.033944399!0.035235176!0.027980497!  
0.026843028!0.028950114!0.032397220!0.028130058!0.043144708!0.035219411!0.039787121!  
0.019544643!0.023614725!0.020581861!0.024704376!0.022378059!0.030932115!0.029497829!  
0.018506750!0.027602409!0.020629849!0.020845986!0.022298957!0.021889151!0.034794540!  
0.030625813!0.034562890!0.032288883!0.029615184!0.032598384!0.057388507!0.036651556!  
0.025679596!0.022871578!0.022898891!0.026500372!0.027298362!0.036102878!0.028355246!  
0.072016664!0.103089163!0.064826216!0.047068088!0.070266081!0.214657160!0.083777041!  
0.059429738!0.068305904!0.057761932!0.058116642!0.062754573!0.074037713!0.075470181!  
0.024884133!0.027970271!0.026323355!0.028820447!0.032993018!0.027184124!0.039506131!  
0.034476234!0.018009430!0.019261690!0.027721050!0.033328864!0.024866532!0.039831502!  
0.015476554!0.019017797!0.017008282!0.015658158!0.020105065!0.021719294!0.027304558!  
0.059855836!0.053694286!0.058498517!0.053950978!0.064086773!0.088064277!0.067221084!  
0.064309927!0.060585774!0.065273599!0.048316590!0.071571299!0.081821136!0.096381919!  
0.098832231!0.095091682!0.074035513!0.083087827!0.172547646!0.127031980!0.220905067!  
0.019789999!0.023298970!0.029354720!0.025374994!0.028757602!0.027403538!0.032438158!  
0.731571862!0.734637232!0.770800045!0.739159356!0.759605865!0.803741313!0.765063669!  
0.050312141!0.053182789!0.066521633!0.067231475!0.063628050!0.074824499!0.094025553!  
0.030876304!0.038053848!0.027912068!0.033462608!0.032239427!0.076155285!0.045053820!  
0.030139752!0.044740535!0.033156004!0.033195539!0.039165380!0.037717536!0.055663948!  
0.098879918!0.084037555!0.123563897!0.125344066!0.135359842!0.176376502!0.156899899!  
0.027852752!0.028937017!0.029235593!0.034960248!0.049351089!0.038433918!0.035168888!  
0.026066384!0.020574916!0.028229695!0.028271059!0.035872233!0.032251952!0.035871603!  
0.064299757!0.090695161!0.063006599!0.069628294!0.073783284!0.101090705!0.118222040!  
0.274497660!0.278051797!0.277020186!0.298733634!0.273891714!0.323306421!0.342260515!  
0.344496895!0.392997800!0.413541860!0.445339448!0.397662739!0.394727864!0.452537044!  
0.242063852!0.292902628!0.213739085!0.227057379!0.335581402!0.200212551!0.332734044!  
0.014914255!0.013056960!0.016197500!0.015733520!0.017494336!0.018039359!0.021286230!  
0.265916132!0.279268590!0.341012949!0.340360063!0.325279420!0.369472315!0.391468180!  
0.081815015!0.082736238!0.087363041!0.079366210!0.098509393!0.092546961!0.103425315!  
0.228424529!0.261229071!0.284828411!0.265421050!0.201698110!0.299550694!0.296730241!  
0.849771670!0.823582383!0.893084143!0.901714622!0.855129776!0.891751881!0.843824984!

0.586179599|0.654073651|0.642611797|0.648985282|0.652709537|0.722668449|0.660995188|  
0.044547288|0.034614694|0.047387924|0.042411074|0.044301634|0.063073818|0.070256261|  
0.029561507|0.020935671|0.024586792|0.024377130|0.028341670|0.043843173|0.039581691|  
0.501779617|0.512384787|0.548146839|0.515716956|0.569441835|0.690759619|0.580027106|  
0.032206031|0.028129189|0.029961668|0.033727513|0.038378418|0.043638438|0.036162325|  
0.537496155|0.579552707|0.643556588|0.714107139|0.699963888|0.836009434|0.626530149|  
0.107722991|0.097442793|0.088104586|0.121426841|0.240612748|0.258095211|0.124504226|  
0.880413577|0.883492006|0.888792604|0.907392030|0.912687747|0.919776409|0.877257778|  
0.475044097|0.516255029|0.523421582|0.564477314|0.485946059|0.446094773|0.526378293|  
0.490535814|0.498214813|0.534672144|0.543745515|0.603348251|0.545078424|0.544601614|  
0.187520352|0.286817573|0.277182703|0.276716756|0.302638571|0.204914811|0.285947448|  
0.647656603|0.610094954|0.682409829|0.694830091|0.649333407|0.808531950|0.722230324|  
0.026447917|0.031356585|0.027232291|0.027689091|0.045053912|0.047051796|0.041379857|  
0.023310864|0.026410797|0.025878259|0.033631479|0.032926558|0.032866385|0.029479912|  
0.877857890|0.911615719|0.888968953|0.932661925|0.906900094|0.924422213|0.885886351|  
0.047246344|0.050649376|0.038129660|0.039092825|0.046288037|0.078403372|0.060985129|  
0.030469477|0.040459277|0.034162431|0.036822222|0.039371142|0.050269618|0.039539982|  
0.297513927|0.341963738|0.331717884|0.373265891|0.335308214|0.428167741|0.370672697|  
0.022906058|0.027126315|0.031142533|0.033099227|0.031183814|0.040103741|0.051094552|  
0.030668825|0.035787193|0.038400285|0.042523227|0.041397138|0.063395500|0.048150485|  
0.262287197|0.323768577|0.286249703|0.305105592|0.341818915|0.317321754|0.354345760|  
0.215242333|0.184576015|0.099110026|0.169445175|0.252828913|0.194478021|0.131297090|  
0.068829119|0.062339968|0.055524481|0.047366624|0.087778028|0.134557330|0.079316112|  
0.027281219|0.034651243|0.033015555|0.034371685|0.043958157|0.041775847|0.043354308|  
0.018130734|0.014334451|0.015553109|0.019243306|0.020500982|0.018976258|0.017361686|  
0.017647847|0.019374239|0.021694602|0.028245117|0.024473149|0.028119989|0.030272718|  
0.028106219|0.035749299|0.024736431|0.028420174|0.033098708|0.053506557|0.034325539|  
0.030873690|0.025337417|0.032391986|0.039473948|0.043865851|0.033418062|0.038298609|  
0.872082997|0.912385916|0.872959492|0.917581317|0.918774660|0.894057328|0.897006332|  
0.025975898|0.020717372|0.022247458|0.026935599|0.025714430|0.028233709|0.030022306|  
0.885445488|0.896338062|0.917363341|0.910130632|0.912513958|0.917370846|0.920051034|  
0.817281678|0.846115864|0.836386986|0.853289427|0.860767925|0.900752643|0.876617500|  
0.252053467|0.280268756|0.271536586|0.301427173|0.338855794|0.242816241|0.339974017|  
0.089393503|0.107280076|0.068184537|0.095165495|0.104607735|0.165159066|0.073098591|  
0.207512357|0.207214907|0.223901420|0.230376156|0.262043238|0.214433085|0.262442150|  
0.489482884|0.490615670|0.584402751|0.539657402|0.569647632|0.567947334|0.525652957|  
0.051288645|0.055012145|0.060466724|0.047513717|0.070539764|0.081262900|0.078242447|  
0.110401316|0.119952174|0.127069064|0.106749244|0.122123709|0.141999024|0.137491541|  
0.816229542|0.821675046|0.850888746|0.918027367|0.885056827|0.887101618|0.856040456|  
0.253814135|0.265049375|0.331729467|0.338725555|0.345592720|0.299127864|0.377320849|  
0.020349628|0.021330271|0.018304060|0.026561937|0.020466688|0.029176551|0.026455285|  
0.033298746|0.045197357|0.031033080|0.037575722|0.038684513|0.051692971|0.053981275|  
0.016119491|0.015761641|0.020371883|0.019303829|0.021761523|0.020278227|0.025887966|  
0.456726283|0.547717955|0.492834329|0.480253803|0.527341188|0.587801249|0.506226953|

0.015905779 0.018470139 0.021713581 0.025164353 0.020009845 0.024240862 0.026213993  
0.028194855 0.034702091 0.025875818 0.040039447 0.042015911 0.035440155 0.045340004  
0.442695796 0.488954967 0.510988952 0.565507112 0.523709786 0.534609344 0.560852370  
0.060660239 0.056442245 0.059121144 0.077282519 0.053829608 0.069923398 0.061343454  
0.024678628 0.021446081 0.023264785 0.027470132 0.027665284 0.029032413 0.032799100  
0.785183161 0.842585645 0.802534246 0.850688300 0.869265384 0.910662296 0.774810111  
0.149503970 0.149595701 0.138378894 0.192210178 0.188860137 0.186128300 0.207901234  
0.031611738 0.029467013 0.032311717 0.030890563 0.033219426 0.042054229 0.036319167  
0.030408244 0.026056446 0.023777382 0.032531054 0.034816884 0.037707011 0.041168262  
0.221076458 0.258147163 0.264466662 0.246604196 0.264824221 0.270510174 0.297231483  
0.021145151 0.024446560 0.023957152 0.027329659 0.027923654 0.034631708 0.028865277  
0.022766479 0.027287966 0.021967544 0.022088558 0.026392426 0.042926861 0.029487767  
0.119277191 0.127911137 0.107847706 0.097290177 0.175444853 0.136396348 0.165518918  
0.052402091 0.035832258 0.043090116 0.045734329 0.052113358 0.056624035 0.046892984  
0.015720211 0.020445855 0.019812019 0.032086624 0.020273150 0.045496084 0.042323385  
0.025776815 0.029923623 0.031619792 0.030134962 0.033529183 0.037331670 0.040601066  
0.026821770 0.032416008 0.025777737 0.026379849 0.028101624 0.040437292 0.043560257  
0.017252633 0.025046476 0.022881880 0.022120606 0.018799783 0.027779196 0.023289381  
0.308327181 0.324711302 0.275294984 0.325232011 0.435119993 0.464028615 0.320387606  
0.446577903 0.460798459 0.487083907 0.502056688 0.510341462 0.485173532 0.502567816  
0.036265290 0.046548532 0.041283345 0.041764331 0.044811357 0.044532922 0.061346912  
0.022060952 0.019710316 0.024228965 0.030942969 0.023565397 0.038902681 0.024792032  
0.890829567 0.867332752 0.865651240 0.868986471 0.842853287 0.846495204 0.760191087  
0.821313133 0.845785976 0.859079904 0.872935588 0.869178214 0.904931476 0.846005510  
0.023485758 0.022906980 0.020279620 0.024349977 0.029989130 0.033895534 0.033067165  
0.390072685 0.411114329 0.422974693 0.408572217 0.456741992 0.420246096 0.442059302  
0.233343542 0.201204090 0.331229427 0.232280244 0.257540377 0.285304784 0.326545255  
0.031466076 0.032803173 0.037919068 0.038398723 0.040734402 0.048799594 0.045675183  
0.028622635 0.029123057 0.038897423 0.037985147 0.051646600 0.044320948 0.045625649  
0.030439631 0.031099938 0.037632562 0.032309532 0.038152537 0.057608715 0.047701537  
0.382157480 0.403181001 0.431184990 0.496259337 0.475471260 0.382318516 0.464739104  
0.482455274 0.595914878 0.661234163 0.574951653 0.726459020 0.733722932 0.609433962  
0.035627402 0.038915207 0.036143701 0.048326515 0.037996515 0.053907588 0.064530106  
0.057499138 0.069488854 0.053003529 0.054325954 0.062162049 0.132643779 0.092027053  
0.062391148 0.110726995 0.068150221 0.068703591 0.087598385 0.199760885 0.072158849  
0.484605282 0.615176672 0.614316165 0.543417735 0.613167019 0.630285128 0.618592257  
0.059099334 0.071297882 0.068066387 0.054833996 0.069839457 0.177206913 0.098660803  
0.014821763 0.012257582 0.018043258 0.016292187 0.016201481 0.015699210 0.026409112  
0.436874033 0.513497109 0.561903686 0.601442588 0.616203035 0.567853784 0.500178450  
0.905295900 0.919326708 0.911150413 0.927693747 0.932249362 0.930142325 0.923434031  
0.378164233 0.516977552 0.347572990 0.420536216 0.471996535 0.327404036 0.446332692  
0.099887515 0.161618202 0.176794714 0.082924212 0.072599437 0.110330165 0.049870477  
0.025137208 0.023537735 0.020064427 0.029857075 0.027386120 0.032016418 0.039466458  
0.024545274 0.026508127 0.028277348 0.030582469 0.028921563 0.031305984 0.027611923

0.086658450|0.075735806|0.089840695|0.128416653|0.106514396|0.083632103|0.113745272|  
0.051781159|0.066368006|0.049249151|0.054054948|0.062980864|0.106528647|0.063341454|  
0.021541281|0.025087025|0.022379988|0.021121766|0.026529588|0.025704065|0.035723961|  
0.099963318|0.101399171|0.104681399|0.108805363|0.124313491|0.103219227|0.165141197|  
0.760915746|0.715444036|0.795363643|0.765393668|0.818121597|0.904914052|0.719962907|  
0.035899315|0.038845548|0.038395244|0.040845782|0.037144398|0.058214896|0.061731655|  
0.027830790|0.030293189|0.029262010|0.033312744|0.037024289|0.042124518|0.036311086|  
0.105335757|0.133342802|0.130964520|0.123746392|0.187035935|0.113503517|0.180521284|  
0.024320862|0.031238255|0.031305940|0.031007081|0.036752680|0.022542688|0.030258762|  
0.895043002|0.878605103|0.903058315|0.903095352|0.912339355|0.929491451|0.895639750|  
0.027542040|0.016803483|0.022826876|0.018950810|0.028564483|0.031083714|0.024855689|  
0.029576746|0.042674317|0.025283583|0.029109686|0.029279916|0.058832447|0.047777442|  
0.018553462|0.024042123|0.023506789|0.020187026|0.026362721|0.034951575|0.028219562|  
0.813717741|0.837657031|0.891150784|0.876378080|0.853611089|0.870154602|0.857102953|  
0.602309125|0.666642073|0.565461065|0.627351411|0.666365862|0.683926159|0.639309627|  
0.020470300|0.018439575|0.020293474|0.023608276|0.020718234|0.032264120|0.027590069|  
0.101497606|0.074449206|0.088359055|0.093636108|0.107712474|0.079662564|0.124719122|  
0.045129559|0.053103249|0.054481423|0.046217398|0.051920685|0.057978221|0.077223579|  
0.873573496|0.903833531|0.794678970|0.888986424|0.756290781|0.784742077|0.865061383|  
0.022476352|0.028599588|0.020250440|0.020470868|0.024243855|0.034595533|0.029666116|  
0.151084518|0.116449943|0.111716071|0.151183552|0.152534780|0.225091789|0.177390504|  
0.029831876|0.016875237|0.025707343|0.026228872|0.038280297|0.065596934|0.038531541|  
0.031639257|0.038247740|0.032340347|0.031918719|0.033465157|0.058729996|0.063277447|  
0.491257077|0.544402465|0.562248247|0.564641350|0.501033164|0.446928989|0.547790578|  
0.046698546|0.047586734|0.055429123|0.056001358|0.060960771|0.056848420|0.083196230|  
0.308624118|0.301215035|0.340444745|0.389795709|0.275030686|0.346924233|0.379194649|  
0.039878796|0.043582150|0.050379691|0.051382403|0.046617368|0.066960322|0.066072774|  
0.043397030|0.034937239|0.037247495|0.044045785|0.038119333|0.044178691|0.049916283|  
0.470769090|0.405491375|0.505148348|0.574083912|0.541185352|0.598113473|0.553416106|  
0.016058210|0.015847857|0.017807172|0.017666181|0.023296122|0.019281407|0.024092494|  
0.461303510|0.477309067|0.466231232|0.531537122|0.527406667|0.520347641|0.523678782|  
0.520109748|0.564697474|0.572753169|0.604462488|0.606498655|0.568633700|0.560973372|  
0.031188078|0.043655217|0.047053991|0.036474700|0.041167052|0.071734216|0.051129821|  
0.034099764|0.031923181|0.044954188|0.032913148|0.034379761|0.038664596|0.062538355|  
0.028170015|0.037020929|0.038693863|0.046041014|0.031288352|0.047983033|0.043388753|  
0.021269324|0.021151380|0.021075657|0.018705647|0.025972949|0.027067793|0.025978219|  
0.062551103|0.051018961|0.063024423|0.059678021|0.054038142|0.062966009|0.092608569|  
0.029671031|0.040777082|0.038800013|0.040215448|0.041620008|0.050867403|0.042464849|  
0.024835886|0.030841611|0.031079595|0.029897781|0.032971686|0.060639908|0.031200279|  
0.037017959|0.038298236|0.049754300|0.031525528|0.058829683|0.052000509|0.074930355|  
0.055105459|0.053046549|0.059766795|0.065762173|0.075364596|0.101061532|0.064271235|  
0.060165568|0.072354707|0.062833686|0.065149420|0.068882887|0.133891185|0.056110866|  
0.028649001|0.046094301|0.041245372|0.041341828|0.041163064|0.064487453|0.040454705|  
0.238635189|0.250309601|0.252890002|0.239261595|0.258599266|0.287440619|0.304546205

0.044419138 0.050747591 0.054905018 0.061234137 0.050877198 0.055568256 0.059472475  
0.342865139 0.392275218 0.380624647 0.261191988 0.464623984 0.392100861 0.431596869  
0.467634968 0.460303977 0.447336962 0.440138731 0.520244393 0.581687452 0.451031061  
0.480021647 0.474402993 0.520580655 0.496730145 0.550788249 0.447833585 0.549640646  
0.065847116 0.062819776 0.063862291 0.057717402 0.064783190 0.057108706 0.093374849  
0.036286225 0.057788938 0.049311158 0.056114808 0.046000156 0.082513797 0.066907450  
0.042792748 0.055717237 0.035959119 0.057612207 0.050753697 0.075655185 0.049535447  
0.435443240 0.467602298 0.468835544 0.478914099 0.498499115 0.507096736 0.469845554  
0.522363687 0.588186670 0.555563742 0.582326615 0.649046257 0.730756164 0.607279244  
0.975266713 0.971639727 0.970566204 0.931458658 0.974203677 0.938576025 0.971610269  
0.824113697 0.815271631 0.821289539 0.847557016 0.887363492 0.863604100 0.846776136  
0.035380096 0.027859721 0.029836153 0.032563521 0.043507851 0.052240567 0.047810895  
0.045249769 0.060456986 0.040667722 0.090846321 0.052810601 0.070686521 0.059071219  
0.026293388 0.030553433 0.023970079 0.029155843 0.030946122 0.028841832 0.029731189  
0.377250955 0.472622177 0.500947596 0.556184502 0.444647435 0.445451463 0.603651477  
0.143277948 0.327586772 0.207590283 0.183943361 0.319770642 0.300673947 0.226953451  
0.214062863 0.230016069 0.244710786 0.255500846 0.273930451 0.279603370 0.316715431  
0.266944794 0.339973640 0.290189288 0.298850664 0.321925142 0.340430177 0.365216223  
0.126113148 0.152875937 0.205535035 0.152833842 0.136562394 0.135454610 0.246534606  
0.061902320 0.053409029 0.058375226 0.051277283 0.064512453 0.072143566 0.052729132  
0.033184921 0.024021501 0.026953696 0.022201482 0.023239622 0.032585674 0.025697481  
0.025428297 0.025170505 0.023502853 0.036083588 0.035355923 0.027564426 0.036999068  
0.190319954 0.278673735 0.271777979 0.265369432 0.252392249 0.264006481 0.264918055  
0.198940624 0.213060245 0.204126734 0.217072694 0.252531924 0.206996573 0.217239809  
0.166835875 0.124660182 0.249412007 0.204849568 0.251695087 0.247490499 0.255441165  
0.369692276 0.399196097 0.407428013 0.387671305 0.429773113 0.451788251 0.426126762  
0.482920261 0.490654760 0.501892607 0.501151552 0.548637593 0.532537559 0.485744498  
0.192745898 0.203073817 0.189658567 0.207199624 0.244456392 0.166305598 0.231892017  
0.638450178 0.695825222 0.681779302 0.710500593 0.713854483 0.801831885 0.717260335  
0.038866321 0.039479057 0.038772824 0.043442640 0.035155587 0.050625731 0.041679434  
0.030469662 0.037021008 0.042195609 0.044753988 0.048050087 0.035416500 0.049441211  
0.027310395 0.026884050 0.028780151 0.032204224 0.025973646 0.036829330 0.055536947  
0.019574365 0.022257263 0.019411394 0.020829276 0.018326505 0.023424153 0.020401646  
0.037804983 0.021805103 0.025568725 0.032761870 0.035723987 0.032337584 0.034491395  
0.868780296 0.854542083 0.882467645 0.905004468 0.863942574 0.916888525 0.910689988  
0.042220886 0.036853583 0.026473455 0.043710622 0.045226396 0.051007570 0.044742029  
0.521434624 0.564802176 0.573013468 0.522136014 0.591975885 0.628524830 0.634983691  
0.040650678 0.042811974 0.042249735 0.043552899 0.030998217 0.055689031 0.086583327  
0.061268129 0.061454590 0.071745151 0.067404267 0.069481069 0.080607085 0.087664480  
0.021198547 0.022589339 0.017016713 0.019593163 0.020250383 0.028446660 0.024219694  
0.265735142 0.315861464 0.299510986 0.355444151 0.383444530 0.384807489 0.310568121  
0.229754177 0.335899258 0.277560041 0.241772953 0.361552023 0.272430109 0.356132226  
0.817011062 0.763136791 0.857841934 0.845344144 0.836204398 0.826768916 0.862904149  
0.019598438 0.032415579 0.026565594 0.025305107 0.031072514 0.028632656 0.040573359



0.042906055|0.056132445|0.043919400|0.048830911|0.056775441|0.133530837|0.051701543  
0.047708150|0.047902974|0.054277790|0.043512970|0.044402390|0.082064331|0.070753107|  
0.020383809|0.018670778|0.017508868|0.019443863|0.026686876|0.025893409|0.035725409|  
0.647677133|0.595098071|0.513916327|0.568790530|0.710458077|0.734642243|0.697624035|  
0.031474804|0.038992459|0.043505527|0.038730721|0.048791984|0.116116113|0.040417020|  
0.034668745|0.036990787|0.048241644|0.040417910|0.049777076|0.041985689|0.043658893|  
0.945699652|0.930278835|0.950057308|0.946402306|0.945592412|0.863341822|0.912629538|  
0.049478404|0.043352874|0.039951635|0.041509864|0.055874931|0.046907014|0.081061298|  
0.074506629|0.088480473|0.070133166|0.058623258|0.082267556|0.191243293|0.103565691|  
0.214508859|0.209425779|0.235370971|0.217251989|0.229079509|0.265916353|0.284996422|  
0.056857817|0.073970198|0.053978106|0.048180260|0.046515103|0.078717061|0.087033507|  
0.480624641|0.500719985|0.533354831|0.502941310|0.504655202|0.580106723|0.532991621|  
0.183034950|0.194189035|0.209333140|0.204082013|0.265696423|0.158679286|0.242475905|  
0.036929054|0.029873058|0.036199319|0.044732484|0.062894012|0.045832980|0.123183325|  
0.659252644|0.705649963|0.676209115|0.676155298|0.692648032|0.764145700|0.696909988|  
0.052499142|0.048485461|0.030105603|0.053790388|0.066232930|0.070267389|0.090090146|  
0.971521737|0.970390591|0.974034308|0.936675355|0.975853136|0.915677678|0.969402220|  
0.527637048|0.391861620|0.273191675|0.451858292|0.514886689|0.335012355|0.346629954|  
0.027662069|0.032937256|0.024010443|0.032133012|0.033035893|0.058967576|0.042814682|  
0.051392043|0.082208297|0.047094105|0.062970951|0.063430816|0.066642494|0.083539825|  
0.039516305|0.040976661|0.037266802|0.032701890|0.045364102|0.100350938|0.042641158|  
0.026407135|0.033393954|0.024745219|0.029266348|0.026200219|0.040485486|0.032150841|  
0.119870322|0.135451334|0.127096371|0.134942074|0.129701548|0.153152441|0.127659788|  
0.089597752|0.092308919|0.102168321|0.096225469|0.102779726|0.136228579|0.121216935|  
0.214446832|0.402154351|0.508395893|0.421767244|0.456280882|0.320520683|0.411075655|  
0.043536080|0.038343752|0.045327672|0.036224897|0.037450424|0.039566444|0.063698302|  
0.095971526|0.151305437|0.124678025|0.090795434|0.169782426|0.275386859|0.160183445|  
0.789390595|0.671372935|0.792083237|0.804115041|0.796613203|0.705113002|0.823500980|  
0.026693396|0.027868585|0.029316666|0.029033979|0.025223855|0.037784807|0.033782225|  
0.174149030|0.150325587|0.176213510|0.158797610|0.196371128|0.207020881|0.198726219|  
0.511756778|0.520895744|0.577053073|0.538540883|0.558783754|0.632712477|0.509668250|  
0.161871125|0.150216541|0.166991208|0.178587198|0.200863523|0.223194685|0.240136145|  
0.730211324|0.769011045|0.731403013|0.743729200|0.813435629|0.768025615|0.774055233|  
0.519612577|0.647253292|0.541263666|0.627648125|0.537980517|0.667007425|0.585651503|  
0.502158737|0.502951452|0.505974893|0.524891685|0.499350810|0.485435785|0.563377292|  
0.113355162|0.103978248|0.151030856|0.118091012|0.115566494|0.124043892|0.136349660|  
0.021267129|0.030592981|0.034657441|0.037747811|0.049956041|0.057870909|0.037274938|  
0.042821647|0.046819235|0.041776430|0.050204064|0.042406552|0.053181967|0.055220171|  
0.828848055|0.856736204|0.824330340|0.836982800|0.845662090|0.841884066|0.841270734|  
0.481466198|0.532930645|0.505446094|0.540275926|0.529066251|0.598040645|0.502177853|  
0.040243578|0.040866947|0.037786289|0.032347698|0.060836816|0.060505829|0.061510362|  
0.512573720|0.566876462|0.544437780|0.594816263|0.530524571|0.582375350|0.555907219|  
0.046753447|0.053550935|0.042626103|0.040132426|0.050521925|0.117111546|0.055668728|  
0.053572008|0.052901897|0.040917914|0.036022414|0.090132475|0.066027459|0.157781917|

0.019957336 0.022124917 0.029831467 0.032265305 0.026092713 0.039494702 0.027622480  
0.295885264 0.329900553 0.320474510 0.317451519 0.345890208 0.397954512 0.385467899  
0.033869610 0.051450691 0.034062003 0.032667990 0.049667809 0.060394930 0.060025255  
0.521939022 0.502720984 0.546908161 0.531501563 0.579892665 0.638080560 0.576372133  
0.031059045 0.031369039 0.027997497 0.035860649 0.041801527 0.048575235 0.043235144  
0.297940780 0.333832187 0.309353780 0.338580576 0.323122974 0.323317417 0.377707379  
0.051441808 0.056835074 0.061382337 0.058014159 0.061014965 0.072243634 0.077668725  
0.834666765 0.844945175 0.721427841 0.827409707 0.885382277 0.861091328 0.834209488  
0.022508160 0.017942569 0.021451723 0.020348363 0.024726490 0.025961936 0.033666966  
0.512517776 0.535147897 0.550231136 0.518883225 0.671448142 0.736163314 0.518817836  
0.530126276 0.501934281 0.498767800 0.500343097 0.605480699 0.469112824 0.590081370  
0.022948674 0.021792394 0.020785708 0.023784845 0.021479513 0.024859824 0.029959423  
0.020629676 0.023909772 0.018407923 0.021870797 0.024360443 0.034741722 0.035968351  
0.022467243 0.020545621 0.022218446 0.027973313 0.025943578 0.032743351 0.044602666  
0.407142745 0.556577429 0.480862703 0.491953176 0.547551562 0.466816610 0.583491264  
0.028724312 0.033288482 0.030056923 0.031980858 0.030028115 0.044983295 0.041719489  
0.707103289 0.785230474 0.716747238 0.773078438 0.756607350 0.765553598 0.731447105  
0.437048402 0.394984491 0.430413265 0.499787815 0.444812304 0.443359962 0.455043182  
0.556651499 0.621615623 0.613040819 0.538552780 0.753762529 0.858229379 0.583151326  
0.021199126 0.025631737 0.024694827 0.021707671 0.020844611 0.033621255 0.028292145  
0.018781184 0.021702794 0.016893648 0.017284024 0.018837865 0.032374361 0.025474492  
0.260921700 0.283001157 0.291718012 0.249075109 0.279282063 0.326830232 0.318349493  
0.376846907 0.392510695 0.412387121 0.411432951 0.481598109 0.409284888 0.455680163  
0.026256417 0.040645974 0.031691965 0.031803248 0.037327087 0.056941238 0.037396489  
0.153947093 0.171430069 0.217972680 0.181552097 0.188860224 0.175252275 0.294344408  
0.710899747 0.795111543 0.745304706 0.787211084 0.801298163 0.870986405 0.809212549  
0.025092027 0.036432347 0.026536833 0.030291706 0.035487948 0.115026613 0.042375601  
0.114916076 0.127088597 0.097640677 0.131565527 0.191619311 0.144638161 0.195126659  
0.197440546 0.204928506 0.235652349 0.253106434 0.249684464 0.202020004 0.342811303  
0.019383535 0.017717328 0.019296225 0.028436165 0.018566733 0.032383537 0.023015434  
0.014672300 0.013705174 0.014600705 0.014776713 0.016368761 0.020307318 0.018540009  
0.047242593 0.046479390 0.059096168 0.047709970 0.050855486 0.073729325 0.080498725  
0.030631342 0.026520615 0.028232873 0.029311677 0.035118724 0.023363622 0.038436077  
0.021492593 0.025123362 0.026952178 0.022398968 0.028869369 0.037683070 0.032560995  
0.046158918 0.065854173 0.051604403 0.056908379 0.049586689 0.057885370 0.059670341  
0.030350339 0.034671961 0.038538497 0.028313138 0.033266414 0.042367594 0.045483460  
0.811116290 0.805743277 0.835190731 0.836146819 0.837889817 0.881769147 0.863007343  
0.013821404 0.013893395 0.017719833 0.017698774 0.018191874 0.021990303 0.021710962  
0.830862521 0.816602534 0.842567469 0.839032284 0.782337473 0.729434212 0.799887799  
0.049519360 0.037002100 0.037569471 0.041080960 0.037893309 0.055727724 0.057079702  
0.026479150 0.027115042 0.026396599 0.026180519 0.028734905 0.035074844 0.036570159  
0.034972400 0.045301642 0.035130461 0.042329001 0.044509234 0.049304358 0.039117330  
0.027578937 0.030796691 0.032106200 0.030648630 0.032671214 0.033671078 0.027814271  
0.033576437 0.035074729 0.027785178 0.036856954 0.045948485 0.046503387 0.041938296

0.644075694 0.659676123 0.681325261 0.631790620 0.664768454 0.797868039 0.705863590  
0.525364989 0.498367396 0.527705099 0.541583780 0.578695821 0.609347909 0.521011898  
0.426031663 0.489318313 0.459952374 0.452732950 0.487290478 0.586970724 0.435352892  
0.017650369 0.021138137 0.017638498 0.019471047 0.017446755 0.030975450 0.024125942  
0.501640586 0.565476582 0.538183651 0.553563743 0.551276393 0.630621432 0.553573802  
0.046176777 0.043137213 0.048091057 0.054339554 0.061453762 0.077528160 0.056946488  
0.700287392 0.605922011 0.709849786 0.685994341 0.714376452 0.716501188 0.699103552  
0.051879680 0.056264661 0.067026728 0.058218681 0.054580101 0.054086224 0.076975948  
0.573704445 0.585106422 0.601880880 0.653420893 0.627809059 0.629206108 0.611132575  
0.792386208 0.747096595 0.798222138 0.829641842 0.798569026 0.837618679 0.763456277  
0.069369278 0.070332928 0.073694133 0.073592279 0.079068250 0.092402217 0.104130290  
0.403019282 0.373835104 0.415989557 0.422483805 0.439645307 0.478217277 0.421953916  
0.015219736 0.020167997 0.013649544 0.022251791 0.016699227 0.022411156 0.026120806  
0.082673838 0.073513290 0.108045545 0.164683482 0.269810602 0.150471798 0.202601150  
0.025551488 0.026983872 0.028353701 0.034412507 0.038170130 0.053770113 0.036925946  
0.586920584 0.592082277 0.604428852 0.641599828 0.689155892 0.752892088 0.575915990  
0.070604023 0.130612888 0.076752239 0.071971699 0.287914902 0.093100754 0.129617452  
0.034647794 0.030190061 0.036192951 0.046677144 0.047190533 0.054237997 0.029401335  
0.020943859 0.042194709 0.030902371 0.026129761 0.035728328 0.038740325 0.038313536  
0.619768370 0.685849332 0.659604667 0.653707823 0.695675860 0.762782168 0.699178236  
0.076977286 0.069436452 0.070276625 0.060819360 0.079503426 0.082928509 0.074856055  
0.041473481 0.048637190 0.050061824 0.045519492 0.048346380 0.060342260 0.057853848  
0.602661089 0.644546538 0.628847414 0.616143208 0.673795063 0.717070488 0.608560059  
0.030601565 0.900453841 0.880540245 0.862912442 0.884948623 0.904137992 0.868910753  
0.835559688 0.862295293 0.867264726 0.880228390 0.871765870 0.880050707 0.855761478  
0.052478257 0.062228166 0.056092215 0.052758737 0.084882236 0.103461121 0.133806886  
0.590479916 0.634882619 0.724177924 0.722660531 0.718981787 0.776394523 0.678811295  
0.037058607 0.046521893 0.031111503 0.037465130 0.044594606 0.057501647 0.036095601  
0.044064241 0.044574922 0.044077363 0.044434954 0.040975449 0.078847409 0.048320406  
0.045164661 0.047013695 0.046404007 0.044850781 0.052517265 0.107292931 0.126843354  
0.028102546 0.019303993 0.030177451 0.027745664 0.033867414 0.052198373 0.038857251  
0.029469243 0.024567605 0.031545852 0.026980143 0.022080832 0.035621258 0.041729269  
0.033963206 0.050828929 0.035961970 0.034541929 0.042507384 0.059529565 0.069661161  
0.072554909 0.106479041 0.092076007 0.105656853 0.069920410 0.053501484 0.100107127  
0.017133199 0.013287586 0.019520049 0.014731998 0.021793779 0.023596686 0.021400406  
0.411584811 0.457466995 0.440403476 0.417674517 0.499658227 0.496472448 0.462599323  
0.052239669 0.070479429 0.063423541 0.048844190 0.104040442 0.084184506 0.113509248  
0.050540087 0.040567191 0.046163624 0.038906914 0.053853470 0.069922228 0.077438040  
0.035098663 0.041411505 0.044873224 0.067714045 0.053897395 0.043400157 0.109002402  
0.159046302 0.163343699 0.215451758 0.237975538 0.201627689 0.212998383 0.266782673  
0.073603390 0.057952555 0.067488898 0.073501395 0.067664226 0.075464264 0.098237793  
0.139530696 0.172334536 0.131612202 0.122145009 0.248424213 0.141939769 0.216262000  
0.650896710 0.760188353 0.717397634 0.728641057 0.699040053 0.800681535 0.696253472  
0.173318965 0.157818318 0.102023261 0.196292239 0.209553412 0.194893770 0.188634982

0.724177990 0.708824630 0.805444070 0.748108450 0.734341687 0.776171379 0.837484951  
0.027246838 0.028913285 0.024406362 0.027813870 0.032701400 0.035359953 0.043147073  
0.487361004 0.453493954 0.508841442 0.483777859 0.483964423 0.508378334 0.533710486  
0.484278308 0.530479687 0.516935813 0.519797434 0.566188408 0.624671134 0.565862042  
0.049223338 0.055312895 0.053656003 0.049827085 0.052359415 0.060860436 0.095970884  
0.023331795 0.030677662 0.025957940 0.031635308 0.023038740 0.037922542 0.042949774  
0.758957330 0.813346160 0.745333622 0.799516932 0.773782950 0.855578447 0.765241242  
0.039335441 0.037135670 0.037299325 0.037120938 0.057169441 0.050998522 0.052941877  
0.539292769 0.574615184 0.636829551 0.547157259 0.555014495 0.567658342 0.547540698  
0.017054250 0.024429733 0.020625477 0.020442974 0.018951177 0.030283711 0.041698167  
0.092258767 0.117592901 0.072394212 0.075136162 0.144656110 0.118117328 0.102266588  
0.495189077 0.459445553 0.536564300 0.536306794 0.512892744 0.616905528 0.545032441  
0.317224613 0.349131091 0.347862645 0.355838174 0.364890922 0.431953269 0.375147066  
0.198607979 0.202811802 0.179910060 0.187899066 0.235206456 0.207243473 0.292449219  
0.064005761 0.060436126 0.048431235 0.039823870 0.085057017 0.138526042 0.064634688  
0.628069983 0.638732622 0.653041738 0.636444938 0.627342631 0.643421525 0.662602511  
0.163906979 0.103968572 0.140802076 0.139119921 0.149894456 0.126391032 0.183246463  
0.481276145 0.525892750 0.528169702 0.497526059 0.505740523 0.612615227 0.561483718  
0.371524546 0.382669428 0.419482374 0.420504500 0.434192167 0.407089071 0.414269857  
0.023060932 0.032910282 0.024543355 0.024231826 0.025693441 0.044103649 0.027443288  
0.598681490 0.528182236 0.593366655 0.681646792 0.684931266 0.621952978 0.703036016  
0.104839157 0.117237464 0.159303877 0.157305866 0.131908497 0.163510508 0.173668878  
0.069791844 0.068036772 0.066211878 0.060557246 0.060103079 0.087121285 0.126834879  
0.025194750 0.028906089 0.022772184 0.018994982 0.023719201 0.036092232 0.037624323  
0.950080608 0.933565188 0.931882770 0.897903939 0.928946489 0.936034122 0.925625984  
0.036092698 0.043590554 0.033975285 0.048322486 0.044006025 0.057631943 0.046151413  
0.029840935 0.027681858 0.030659980 0.029414585 0.028050467 0.039145272 0.039641413  
0.917703219 0.934951144 0.905844051 0.928829176 0.935604362 0.928986513 0.917838233  
0.920130737 0.896780571 0.921464312 0.875361474 0.863698510 0.804850381 0.844651851  
0.845409043 0.871826537 0.866482849 0.870571762 0.929912296 0.920668865 0.866295460  
0.778604739 0.817814514 0.828605746 0.817048364 0.823232676 0.801834620 0.867451347  
0.039043298 0.044652660 0.049705871 0.053848263 0.056590292 0.068822183 0.059113444  
0.018395121 0.030869493 0.033564671 0.026160980 0.027071310 0.033491418 0.032814279  
0.412188740 0.525573979 0.542271193 0.528126147 0.532030281 0.615266929 0.522644048  
0.514424701 0.538795240 0.493167178 0.532010024 0.561859476 0.507726838 0.545899588  
0.042686570 0.044375774 0.041103151 0.051805007 0.040574357 0.053860564 0.052869470  
0.421177782 0.385761747 0.458407368 0.426082456 0.437106643 0.475554988 0.457801695  
0.029397510 0.032549000 0.033783381 0.024634092 0.040084895 0.047338818 0.042835513  
0.060635699 0.074905372 0.077056940 0.066658476 0.081326106 0.079482392 0.118432559  
0.396127078 0.435135557 0.482658087 0.465755184 0.474268561 0.457851023 0.460311571  
0.027173926 0.026387371 0.025836675 0.033107469 0.026000226 0.038303501 0.035650403  
0.058259479 0.068047507 0.052232932 0.063457304 0.068820461 0.071297757 0.074065160  
0.244719893 0.304301536 0.254922953 0.370863254 0.328644191 0.381703525 0.290774533  
0.881738624 0.920382987 0.873723194 0.888820577 0.913941821 0.934833092 0.878406546

0.049956913|0.060919426|0.054553989|0.051307683|0.064184085|0.080706805|0.055756631|  
0.268470499|0.280720259|0.241528538|0.260742845|0.361823023|0.365791089|0.349399527|  
0.034707806|0.026122103|0.031937502|0.029991473|0.037378741|0.042662666|0.040406144|  
0.379876605|0.484599993|0.397577538|0.461389453|0.525578128|0.555135337|0.457516271|  
0.029497435|0.037848994|0.036785883|0.037865479|0.030830570|0.059899284|0.035580707|  
0.267509499|0.311099571|0.306995096|0.317962426|0.338238800|0.385283249|0.381044796|  
0.294327011|0.339793705|0.380659685|0.386007876|0.465736387|0.338021963|0.388757603|  
0.035650149|0.035079968|0.037027023|0.037704598|0.046282622|0.039880122|0.042662185|  
0.101246448|0.103027403|0.114463552|0.117477709|0.109117621|0.140232828|0.162775500|  
0.028887893|0.028587357|0.032760680|0.029238250|0.043049819|0.049237212|0.036058864|  
0.022212771|0.026460964|0.028215914|0.034574174|0.037914514|0.041212065|0.031626396|  
0.036409445|0.040667847|0.051341095|0.047579367|0.047860749|0.057632056|0.064142315|  
0.085568636|0.078578370|0.074301973|0.091989910|0.116045577|0.188298041|0.104210381|  
0.892223743|0.869738350|0.900169778|0.896012362|0.897152841|0.801873803|0.837774855|  
0.051429623|0.054597390|0.058591860|0.049116180|0.077336584|0.072255481|0.046612827|  
0.032916576|0.043516207|0.030615703|0.039712703|0.030087304|0.048395977|0.038079657|  
0.968763113|0.954241173|0.968545879|0.967449183|0.963178633|0.928093132|0.952884815|  
0.050873922|0.058063651|0.056156720|0.061791821|0.067966335|0.068235789|0.059395762|  
0.032987043|0.030720421|0.039116416|0.037066789|0.029994669|0.044359074|0.046886695|  
0.914440223|0.694615925|0.896434738|0.945470616|0.929150141|0.935125310|0.859520577|  
0.036015554|0.033182389|0.036576070|0.026850521|0.031023993|0.052473874|0.048118250|  
0.048884125|0.043936451|0.050487101|0.046431223|0.048389407|0.064639467|0.064930810|  
0.920366250|0.910043240|0.915703130|0.932643931|0.924360982|0.802856082|0.874650482|  
0.042913539|0.032533737|0.037166357|0.049091918|0.031569555|0.054624751|0.045045476|  
0.605564004|0.672703847|0.643546646|0.623594606|0.632297238|0.611506573|0.587521148|  
0.412928707|0.415332227|0.472024609|0.456081577|0.475893544|0.484056638|0.456625748|  
0.029088411|0.027032148|0.035758858|0.035672779|0.022657233|0.048293168|0.044813808|  
0.026001945|0.023869808|0.022337358|0.020613369|0.024185737|0.025403905|0.033549773|  
0.462512077|0.482315141|0.523006504|0.432375695|0.527437863|0.511404529|0.488333956|  
0.061152484|0.068184347|0.058156811|0.056059649|0.079277289|0.104962090|0.078352179|  
0.052307990|0.061438933|0.063382809|0.049914016|0.067531142|0.082617327|0.094419939|  
0.044970219|0.045982105|0.066528321|0.054185697|0.064136613|0.043882136|0.078157335|  
0.045485608|0.043845918|0.041882391|0.048202142|0.039899801|0.062970203|0.044571609|  
0.453840834|0.498339572|0.446082440|0.455712888|0.475820430|0.515085500|0.455349795|  
0.017180364|0.022416535|0.023910202|0.025485287|0.028286581|0.024098296|0.033891294|  
0.021805588|0.021494429|0.020465763|0.023440570|0.029589705|0.028784334|0.028898042|  
0.814420775|0.829897870|0.818089157|0.798709518|0.877896885|0.864951747|0.797944040|  
0.161463529|0.184260832|0.165064203|0.137381108|0.107257949|0.033438120|0.034902969|  
0.023397828|0.020940725|0.026674919|0.029269255|0.032362350|0.033620013|0.031385342|  
0.076748650|0.089386987|0.068365840|0.063126912|0.064278609|0.172130090|0.112208293|  
0.059407534|0.063410448|0.054723329|0.051630040|0.062147550|0.086102804|0.082584056|  
0.192991142|0.173483308|0.153892117|0.202236835|0.166471904|0.309314356|0.188782063|  
0.684866723|0.595053776|0.503813649|0.537457218|0.603121013|0.379506124|0.387649412|  
0.814434319|0.843101236|0.850659142|0.792328050|0.824948107|0.831250812|0.854162727|

0.023993074|0.027390883|0.020107610|0.023909185|0.025277826|0.034815203|0.037806276|  
0.027780592|0.027522849|0.023199627|0.038846457|0.041673748|0.039455181|0.046724712|  
0.544853520|0.565193195|0.545763827|0.563531139|0.585300727|0.634330483|0.562310746|  
0.766334806|0.742047827|0.754580237|0.778647872|0.761745497|0.735988725|0.762072354|  
0.806015351|0.822093128|0.833717185|0.834229387|0.823191559|0.873769548|0.792190899|  
0.017779406|0.015399619|0.016551036|0.019012906|0.021109491|0.027477689|0.028764341|  
0.916706414|0.767979167|0.845664938|0.823519304|0.684695772|0.786445769|0.878173451|  
0.047666846|0.048827557|0.055126778|0.036078569|0.038924711|0.071831696|0.060222929|  
0.042557820|0.054040667|0.037888318|0.048949182|0.116389848|0.068136155|0.067874733|  
0.768348770|0.824860020|0.761488082|0.830395719|0.784261064|0.813296305|0.854996529|  
0.127057269|0.131701389|0.152014371|0.129375207|0.141140162|0.139165504|0.171963438|  
0.511777858|0.546573232|0.526228407|0.517072090|0.534682363|0.591582477|0.556847388|  
0.038505660|0.043281261|0.042310508|0.046583881|0.045298367|0.051894223|0.062692046|  
0.500296819|0.541743860|0.493328567|0.540432110|0.574846514|0.537425792|0.536671525|  
0.660457796|0.701353743|0.703065925|0.703720917|0.718646381|0.714245455|0.696192208|  
0.409139845|0.375820374|0.422773797|0.416605232|0.425966863|0.405248734|0.467819463|  
0.786391045|0.830731355|0.843457017|0.842367362|0.857960176|0.853915171|0.865364509|  
0.045931565|0.030978669|0.053382102|0.044412937|0.048100764|0.052247791|0.078045943|  
0.843931097|0.833221682|0.859428947|0.867338734|0.861239274|0.887961612|0.873925664|  
0.251274002|0.235887368|0.261128993|0.331040794|0.319835544|0.251512094|0.316380610|  
0.055898107|0.072780582|0.066253836|0.055432155|0.075999228|0.149150321|0.057014184|  
0.132847281|0.120379238|0.144159186|0.124744545|0.132302113|0.101242590|0.167324929|  
0.029611845|0.026954445|0.028761112|0.031617924|0.025133784|0.044011649|0.032197975|  
0.019982411|0.018266741|0.024465249|0.021674517|0.023420010|0.024127911|0.026695396|  
0.914499743|0.896388247|0.916926826|0.915915165|0.875909623|0.927669334|0.903339894|  
0.043766638|0.058089685|0.049927582|0.054336339|0.062300972|0.044174303|0.062020639|  
0.842612229|0.843271455|0.893939702|0.879863910|0.879630413|0.903413784|0.891189635|  
0.058701366|0.063892466|0.071553471|0.082072601|0.070742871|0.081471644|0.066825756|  
0.020974823|0.021065132|0.022731781|0.024492447|0.020330353|0.030478041|0.034979122|  
0.040456980|0.026049729|0.045078146|0.031530085|0.055335713|0.054784879|0.059047991|  
0.379530032|0.400661325|0.352999120|0.376421596|0.457869498|0.561647159|0.385457082|  
0.072193362|0.073067380|0.054849572|0.048442930|0.049700233|0.151540236|0.120487071|  
0.862987889|0.873867412|0.910324960|0.901759399|0.886842281|0.898613281|0.898437022|  
0.024586415|0.025837752|0.023250725|0.023433390|0.026012643|0.032721204|0.023170242|  
0.019706549|0.033350495|0.026128630|0.025519062|0.024566886|0.028427982|0.029315396|  
0.862489013|0.859628743|0.847420761|0.882505984|0.853284616|0.870520336|0.858535273|  
0.066357072|0.058392583|0.057219867|0.067222202|0.070388924|0.091278046|0.086140382|  
0.578769960|0.637549496|0.583512563|0.585634612|0.611082513|0.581850537|0.642501381|  
0.077140562|0.075781293|0.078687684|0.064349835|0.103929751|0.082345516|0.119741643|  
0.291967367|0.394612786|0.357725622|0.394041590|0.333953410|0.366915055|0.419220968|  
0.382111151|0.425248640|0.466822939|0.412799222|0.496462430|0.500411024|0.407258952|  
0.044005112|0.035143527|0.047895030|0.041762575|0.053881757|0.042393521|0.063268579|  
0.907050364|0.910302926|0.907971484|0.918917773|0.926830540|0.928056156|0.897552235|  
0.709509999|0.724302985|0.751558767|0.790818562|0.755922314|0.854558920|0.706014595|

0.904714509 0.847691857 0.920233681 0.900996056 0.916638718 0.929194689 0.874462687  
0.414700932 0.417331850 0.412395303 0.481897917 0.462443111 0.392642043 0.447681130  
0.019269936 0.022607910 0.024688714 0.039661948 0.027571280 0.028895267 0.029131925  
0.016548732 0.021048945 0.016730971 0.021498198 0.020257238 0.022904492 0.026208939  
0.297265101 0.313571191 0.250116010 0.201463297 0.366940649 0.393067345 0.391234650  
0.794394177 0.691906788 0.812570661 0.772604267 0.775350489 0.607231881 0.733255509  
0.376300779 0.343452121 0.394204625 0.395941967 0.405409337 0.356856432 0.415979220  
0.331266447 0.353839153 0.327414080 0.312379890 0.380961676 0.284185498 0.349772643  
0.751252293 0.845936940 0.795042688 0.803746519 0.858000052 0.910349063 0.772196347  
0.024964319 0.026904062 0.025970964 0.023095116 0.025940024 0.024222111 0.027185631  
0.521318954 0.561830213 0.561096879 0.527803456 0.560717447 0.678884185 0.577594589  
0.183568664 0.183595297 0.184985096 0.216255307 0.173380866 0.167942723 0.250540257  
0.038526289 0.050963533 0.047564459 0.042799938 0.043118232 0.077300104 0.071370147  
0.019463867 0.018712200 0.021153193 0.019127914 0.023662934 0.021696240 0.025692624  
0.027713658 0.025677867 0.025271098 0.019651640 0.026254593 0.033409445 0.034337765  
0.862428181 0.896873749 0.880990293 0.906355737 0.913482131 0.920169884 0.917088024  
0.043183498 0.051468791 0.046329392 0.048071729 0.051304068 0.067360219 0.057225220  
0.677198925 0.726662909 0.786219046 0.737559931 0.718191866 0.774200136 0.769647274  
0.104210416 0.138824426 0.083703454 0.096194642 0.113416514 0.224682040 0.103027747  
0.791506031 0.838829021 0.842846853 0.819696458 0.845539736 0.850684700 0.836998065  
0.188666656 0.234360562 0.191817269 0.229788455 0.215883361 0.215385065 0.222501404  
0.071033622 0.083130668 0.075118509 0.053902666 0.073191898 0.094845364 0.090982194  
0.509061129 0.537557742 0.564133544 0.545939610 0.542422270 0.570819810 0.534967372  
0.854795159 0.849066232 0.871097893 0.876601322 0.844862112 0.888379594 0.855189530  
0.067598264 0.080154569 0.064376652 0.066825113 0.084177923 0.179058642 0.085245495  
0.029794971 0.028365137 0.026827359 0.025907422 0.024955751 0.043253936 0.056927521  
0.049060656 0.047867679 0.058694660 0.055022471 0.047601227 0.076744993 0.061713534  
0.020414104 0.016178288 0.018767974 0.018183890 0.019765454 0.024919536 0.025810145  
0.209980223 0.203750408 0.190533900 0.240292252 0.262213982 0.214981360 0.273404613  
0.613631434 0.638865247 0.640161814 0.616928469 0.632596991 0.663624437 0.682261388  
0.436827993 0.504730582 0.503808276 0.448278610 0.522763254 0.616998484 0.451815316  
0.053903726 0.055605978 0.048610644 0.047570472 0.055930956 0.062888290 0.076634536  
0.810977460 0.779549870 0.784443743 0.785636592 0.762073564 0.809504830 0.791180035  
0.021140140 0.029788636 0.021668978 0.023752074 0.036235998 0.045393853 0.035765756  
0.783029884 0.821672191 0.806836612 0.807899343 0.753010382 0.838383171 0.841587474  
0.041193419 0.069890470 0.056641925 0.063143177 0.086636920 0.100929450 0.059935076  
0.050443723 0.052848165 0.040512807 0.047711099 0.050904287 0.049186103 0.055688303  
0.152669148 0.158416738 0.150916558 0.100132090 0.155467025 0.109001261 0.070049365  
0.043703894 0.044332798 0.049816938 0.045839126 0.053563195 0.056979453 0.070703937  
0.142592144 0.163026383 0.134279117 0.188828461 0.128178514 0.200141037 0.194083314  
0.520156888 0.560273807 0.523959120 0.499364075 0.518510226 0.586858173 0.529790333  
0.055148529 0.067398953 0.055750907 0.050777255 0.077131191 0.165527819 0.096017152  
0.118162604 0.117901246 0.138596001 0.144101420 0.146301442 0.154932438 0.169328717  
0.027550086 0.028708579 0.023382085 0.025140497 0.028445297 0.031647051 0.035165293

0.806721306!0.816938164!0.832750587!0.825742478!0.851984621!0.867521695!0.804055351!  
0.869779413!0.844945259!0.895789713!0.889278089!0.900545075!0.893370246!0.859865506!  
0.050931982!0.108151977!0.058390347!0.051780185!0.073292782!0.123372016!0.084890527!  
0.020307731!0.022824815!0.021521655!0.018779097!0.021820217!0.032487390!0.023927776!  
0.028318726!0.028544801!0.033393382!0.036457272!0.034477101!0.036085166!0.049417832!  
0.030415351!0.029568626!0.032334565!0.043271321!0.033373480!0.045336227!0.033248843!  
0.407158448!0.458881182!0.350637239!0.411441396!0.539710526!0.405184530!0.449414818!  
0.032715939!0.034958467!0.035571580!0.037323038!0.045766542!0.043294490!0.040892157!  
0.024426143!0.031665208!0.039077059!0.033470549!0.042851325!0.057478067!0.035538837!  
0.025772504!0.036776197!0.028117704!0.026990430!0.034641182!0.042015263!0.044906536!  
0.032411232!0.033083342!0.028964337!0.046370188!0.029463887!0.065218619!0.029951369!  
0.116415022!0.149716803!0.122051494!0.169992414!0.135466406!0.110768510!0.184248882!  
0.769553323!0.814333465!0.739095409!0.834391465!0.808745730!0.784691233!0.775679100!  
0.010798221!0.009652449!0.011540778!0.013723895!0.009894054!0.014213685!0.022266288!  
0.274462220!0.304019067!0.317840930!0.304127794!0.324140207!0.396512221!0.433633823!  
0.063997987!0.063465479!0.058874565!0.055529904!0.060818821!0.085850520!0.091627421!  
0.251555763!0.299155623!0.297817634!0.341650257!0.280337411!0.250474666!0.355542730!  
0.063530762!0.060388582!0.078904314!0.071022563!0.072588710!0.141479419!0.061757744!  
0.024237571!0.030072275!0.031450718!0.028753159!0.025109584!0.043235545!0.044505532!  
0.034908055!0.044339412!0.031938840!0.037337984!0.063149634!0.058624804!0.035498900!  
0.030115649!0.024791349!0.026571525!0.039188102!0.041166170!0.043975429!0.034776570!  
0.093251022!0.117091908!0.092762776!0.111386875!0.137503234!0.234351474!0.116272283!  
0.873196484!0.881483280!0.854917181!0.907565379!0.904517463!0.885510640!0.904310054!  
0.059536486!0.070911946!0.050930459!0.044279028!0.056716318!0.155508462!0.061119308!  
0.021405465!0.030836718!0.024939141!0.051326539!0.029148009!0.035077504!0.038228749!  
0.074406518!0.083529957!0.092495764!0.092705177!0.105501459!0.066270012!0.128135342!  
0.044627226!0.052534954!0.037243194!0.037224101!0.040350271!0.067223051!0.034270101!  
0.446524021!0.471499390!0.442787469!0.460597518!0.507208081!0.671128430!0.501100680!  
0.047693750!0.058698325!0.040118347!0.046992822!0.048017265!0.115964292!0.056128294!  
0.037935241!0.040814607!0.042797364!0.039599323!0.042828510!0.064121430!0.037372726!  
0.048049477!0.070809688!0.061823899!0.065230199!0.067778420!0.058384557!0.086317392!  
0.020915983!0.020344921!0.021505741!0.027120466!0.022897869!0.024016989!0.051778554!  
0.351353531!0.299903253!0.344532302!0.332354020!0.370000553!0.321160615!0.389301142!  
0.900879019!0.931414681!0.915085712!0.937294823!0.926021686!0.945556085!0.915072864!  
0.307861990!0.479438150!0.368828086!0.335077280!0.533285384!0.531461850!0.418780558!  
0.188330213!0.228464328!0.225228023!0.243424503!0.270151632!0.184578273!0.319452777!  
0.428144567!0.420861323!0.400309853!0.419543173!0.512400009!0.601547437!0.411453152!  
0.199412200!0.156800335!0.173477040!0.153409751!0.227469120!0.202232529!0.230920755!  
0.860043591!0.845440136!0.863885146!0.844755804!0.893509938!0.893486705!0.873744988!  
0.042352538!0.061508694!0.055652713!0.043807722!0.053104967!0.169255658!0.064685078!  
0.085254737!0.083991263!0.085801767!0.083044919!0.090899677!0.096214630!0.112807820!  
0.618797632!0.609423653!0.622085545!0.637904792!0.658671149!0.667988190!0.686172314!  
0.114311738!0.154676369!0.168490350!0.086552357!0.082966923!0.050777585!0.043559566!  
0.021592336!0.021221839!0.020342521!0.023629650!0.028329893!0.026834360!0.025325902!



0.487444045!0.494613404!0.540186423!0.545750265!0.526549812!0.536018599!0.569580575!  
0.028296259!0.018332716!0.019511764!0.022504309!0.025849003!0.032279671!0.042674706!  
0.026264635!0.030478050!0.021949429!0.023353646!0.029423977!0.044296835!0.044262433!  
0.022883980!0.025212108!0.029701686!0.027471227!0.029591986!0.032743136!0.037435624!  
0.059388310!0.069029249!0.070879748!0.074726940!0.076662424!0.064765548!0.098317468!  
0.037768823!0.034794465!0.034163495!0.048306017!0.037181560!0.049755190!0.072457760!  
0.016163989!0.015143998!0.018425739!0.014987574!0.016479013!0.021573452!0.025416938!  
0.693236240!0.722762707!0.720129575!0.752062462!0.711338420!0.790136515!0.705675072!  
0.026556719!0.031670418!0.025306167!0.031995878!0.029775848!0.050225796!0.033969865!  
0.022575342!0.024537284!0.022780265!0.024184061!0.021854076!0.032984706!0.029101427!  
0.185817818!0.224670245!0.187761606!0.226246752!0.294883317!0.167999490!0.215024288!  
0.946567784!0.942594010!0.957431852!0.895817815!0.833737937!0.934922798!0.911557946!  
0.045438489!0.066173692!0.037841229!0.043568932!0.056265012!0.189596167!0.063194870!  
0.041966436!0.032244252!0.031806681!0.028284007!0.031897561!0.041212046!0.051298990!  
0.773606354!0.845398553!0.761633964!0.788592333!0.806595846!0.889165871!0.759587815!  
0.609097449!0.609013335!0.627393449!0.614677060!0.605083832!0.617025366!0.651347970!  
0.044416195!0.036037322!0.043886826!0.056440295!0.041405638!0.050618491!0.035115278!  
0.020663562!0.033252302!0.025207504!0.028107390!0.024238341!0.035556156!0.034245744!  
0.047726707!0.051987718!0.047970203!0.040329123!0.055610103!0.067995684!0.077347632!  
0.416596359!0.500056237!0.493219976!0.474964066!0.557112915!0.534704835!0.576013267!  
0.117037436!0.131274426!0.103974764!0.130920247!0.149519407!0.274147616!0.137263481!  
0.086875526!0.119466696!0.089180594!0.121769319!0.104753947!0.236360868!0.104084615!  
0.033993299!0.048432224!0.037294787!0.030264131!0.034543464!0.057341918!0.060165515!  
0.645999480!0.723932029!0.711704232!0.703111168!0.762400580!0.852393867!0.617824690!  
0.040357903!0.062636450!0.056200906!0.046533218!0.060268782!0.141617788!0.078184194!  
0.030720679!0.031388599!0.025296276!0.033720432!0.032146599!0.033224735!0.051084811!  
0.863080326!0.916532569!0.871415847!0.904201596!0.912879856!0.914914843!0.890674775!  
0.025516966!0.032340742!0.027388413!0.028403103!0.027588738!0.047993285!0.026451089!  
0.026668310!0.028715268!0.027989293!0.029765403!0.035787379!0.029390871!0.025698317!  
0.047678455!0.039450089!0.031711504!0.032597432!0.052418158!0.066241873!0.039521383!  
0.012570426!0.016075895!0.012204855!0.015024287!0.016081706!0.013025108!0.024623610!  
0.951051454!0.955430716!0.959318199!0.942690282!0.954946634!0.948908767!0.934530519!  
0.638403530!0.734815665!0.688621971!0.654978910!0.742399354!0.780717376!0.609045528!  
0.029890513!0.036201835!0.028265330!0.031344030!0.033975812!0.057658672!0.072904727!  
0.059620444!0.047316463!0.048655817!0.065320245!0.060872983!0.078032352!0.089488089!  
0.023783965!0.024072325!0.024649405!0.022996679!0.019382169!0.031343421!0.028976659!  
0.033476982!0.042040713!0.046199158!0.040527678!0.044146990!0.067865191!0.046221417!  
0.238727946!0.148027809!0.137729564!0.214430992!0.206434275!0.279845329!0.236752127!  
0.018582760!0.020245295!0.020649973!0.023206584!0.019308813!0.022913244!0.034374722!  
0.012465878!0.013811801!0.013208124!0.013638686!0.017725341!0.017764021!0.024309165!  
0.542715976!0.489493421!0.568949649!0.560387671!0.552971512!0.661787565!0.509227186!  
0.036225624!0.044769282!0.046280539!0.035895186!0.056391289!0.079837378!0.048215559!  
0.156221489!0.155447846!0.190819697!0.164254734!0.201386199!0.201820746!0.200918797!  
0.031343343!0.035875438!0.027698770!0.028014984!0.036709174!0.045989948!0.036036969!

0.034775344|0.030793699|0.028222769|0.026373795|0.032625478|0.029091054|0.038837755  
0.231867912|0.263553982|0.211441678|0.220137472|0.325899959|0.340318475|0.220392248|  
0.184265629|0.184193138|0.160508789|0.190565451|0.204143010|0.136481439|0.228487760|  
0.067449123|0.085383363|0.054030345|0.072712472|0.098674519|0.071251648|0.138917413|  
0.050041854|0.055924331|0.047331695|0.046171636|0.053508547|0.156156759|0.055130749|  
0.068797694|0.075184852|0.071909371|0.065262230|0.072446719|0.096484649|0.108308978|  
0.015744791|0.019295654|0.019086713|0.014640122|0.018049418|0.022682766|0.021076435|  
0.025845521|0.030718125|0.018887072|0.090555483|0.031512683|0.042278917|0.334190720|  
0.445444792|0.507156563|0.355078651|0.379625535|0.566648325|0.475851875|0.485359063|  
0.888990786|0.901639523|0.920455614|0.906110742|0.912000346|0.906929401|0.921986375|  
0.035739058|0.042489604|0.040279146|0.041475852|0.047895432|0.047072939|0.065706424|  
0.050617660|0.073757517|0.066718747|0.137166896|0.059421973|0.219360308|0.068728844|  
0.784654508|0.799935371|0.726960316|0.829789018|0.863305886|0.858460368|0.769885933|  
0.389569250|0.393303437|0.482739790|0.412368643|0.416385273|0.427843096|0.523632584|  
0.296688373|0.447657774|0.484355751|0.482309129|0.463844093|0.466489146|0.517099608|  
0.863046180|0.834129252|0.856159058|0.890621177|0.875227279|0.885514754|0.860204558|  
0.023610400|0.036048486|0.018901803|0.019225630|0.025952657|0.041069724|0.040559758|  
0.166444315|0.169620882|0.185883199|0.186992749|0.256730255|0.127421861|0.216433801|  
0.039660408|0.046709067|0.047310514|0.037647477|0.053208467|0.047153355|0.064816039|  
0.202713192|0.230180647|0.224928757|0.249558525|0.248267831|0.227325082|0.300577623|  
0.027923746|0.023787720|0.021996536|0.023160301|0.024829570|0.023700549|0.030645523|  
0.570131279|0.679949302|0.686170322|0.628895563|0.720386470|0.713676442|0.665962676|  
0.036603725|0.044399491|0.037034648|0.045401263|0.051629263|0.067150103|0.047257668|  
0.060024298|0.067992927|0.052900495|0.043300258|0.060285816|0.162081230|0.095167773|  
0.037483643|0.060109494|0.037797252|0.036728668|0.035241685|0.090163981|0.048480219|  
0.182920777|0.213023279|0.186757693|0.217926607|0.204081254|0.178413007|0.202317046|  
0.034095950|0.037522501|0.037257736|0.036167896|0.045126273|0.061223699|0.044167132|  
0.027349981|0.023953515|0.030207575|0.026668563|0.023953977|0.037812007|0.028444015|  
0.038349872|0.037280508|0.041559943|0.036224349|0.035764367|0.050620272|0.068400326|  
0.949191025|0.941120526|0.946998353|0.735151027|0.959858908|0.914990312|0.921174928|  
0.022818053|0.031371730|0.030333463|0.024277648|0.031944911|0.030026350|0.037313561|  
0.045060208|0.047817726|0.056981721|0.051715623|0.051949550|0.070195036|0.077214033|  
0.218594326|0.233181406|0.246819899|0.245645304|0.233394717|0.289634685|0.278767819|  
0.107128326|0.173110667|0.138400361|0.105697503|0.212538296|0.116501585|0.114677184|  
0.026118573|0.036910095|0.027114124|0.026628856|0.035019623|0.049914761|0.032248283|  
0.025049051|0.024459627|0.028207166|0.033845644|0.029227488|0.037597456|0.025987572|  
0.143767732|0.157937655|0.157894897|0.162541799|0.221823226|0.119114452|0.225603016|  
0.220894890|0.238194719|0.250956911|0.245284917|0.267243398|0.282161299|0.302108012|  
0.018149614|0.036069413|0.025226501|0.024942825|0.020799984|0.043621845|0.026841725|  
0.915173272|0.889768410|0.922591763|0.883883849|0.846072401|0.869365432|0.883945327|  
0.464684357|0.421771516|0.443713482|0.417885020|0.510875874|0.487410420|0.475634094|  
0.913538547|0.903577723|0.908907483|0.900509176|0.903371026|0.763372459|0.857820893|  
0.019326239|0.024509593|0.016244186|0.016867887|0.028412972|0.026358523|0.026997297|  
0.222479437|0.246000396|0.260966401|0.273654680|0.273504505|0.212484255|0.348508568

0.015633131|0.015360231|0.017729927|0.014875867|0.019026971|0.018592997|0.028716705|  
0.017353414|0.018389273|0.015286894|0.020734994|0.025309109|0.019702366|0.034676876|  
0.061040187|0.065752869|0.056426337|0.056291452|0.062318593|0.063967006|0.062700962|  
0.019571606|0.021095862|0.024677066|0.029975969|0.027326524|0.038860816|0.050198312|  
0.056127414|0.064706227|0.051974212|0.052004068|0.062055143|0.078193624|0.065400900|  
0.025899589|0.024951516|0.023750252|0.023350754|0.026761816|0.032426385|0.027424307|  
0.794019696|0.782076136|0.869630421|0.863331284|0.810762309|0.910258369|0.800433307|  
0.043156430|0.052507777|0.044079448|0.044163901|0.050569549|0.059039365|0.056411664|  
0.020072711|0.019738247|0.018862795|0.021697888|0.018405211|0.026412249|0.027076032|  
0.563662456|0.650181266|0.617245149|0.607034308|0.598618818|0.660132749|0.637303570|  
0.419547480|0.432673091|0.430990175|0.534875921|0.505740203|0.517236013|0.477483466|  
0.768770544|0.799086840|0.789611611|0.786553448|0.819738734|0.851933339|0.727292734|  
0.511980788|0.522848192|0.549809096|0.611335937|0.607699834|0.555208750|0.596388559|  
0.429629241|0.428563727|0.449238528|0.443359157|0.432984051|0.536846795|0.478945318|  
0.027019679|0.024349820|0.024096427|0.023056679|0.030903507|0.029651593|0.048443525|  
0.016246211|0.020564001|0.023660733|0.027855327|0.026323150|0.023446358|0.025645418|  
0.829840412|0.831084960|0.839753873|0.880997775|0.882404889|0.906650346|0.868432395|  
0.022671069|0.019563257|0.020319822|0.026007991|0.024621140|0.026185198|0.031491253|  
0.022276814|0.022623579|0.027324521|0.025319475|0.030207822|0.036383495|0.037289171|  
0.032470884|0.031421371|0.025969677|0.032557166|0.034871711|0.027235115|0.038002954|  
0.063864796|0.069995824|0.060784431|0.075226464|0.072912462|0.088486462|0.088444029|  
0.748898501|0.721746070|0.726844077|0.737806078|0.793366590|0.730991831|0.780139771|  
0.026014786|0.033493807|0.024881479|0.035145439|0.037486071|0.045262238|0.032036374|  
0.039031507|0.036288715|0.027121077|0.028748425|0.037858976|0.033756593|0.071504879|  
0.030090818|0.024950269|0.028683701|0.030386643|0.029009670|0.034882173|0.055371997|  
0.407106917|0.472797919|0.417964107|0.400321270|0.483643698|0.572515032|0.457892996|  
0.069072881|0.078067984|0.086644724|0.094126763|0.092351226|0.080705909|0.088412269|  
0.903928022|0.867787930|0.889492973|0.885007375|0.902665649|0.920722687|0.897071385|  
0.040788842|0.054412012|0.046379748|0.041775779|0.050577753|0.140594893|0.060498606|  
0.800354969|0.834279946|0.839075974|0.865539952|0.903602560|0.847613309|0.835465192|  
0.051547831|0.050263838|0.074716373|0.063632972|0.070002686|0.051452941|0.075152933|  
0.023296762|0.023838846|0.029824155|0.025951142|0.043819674|0.031766633|0.040543345|  
0.032606641|0.027377762|0.032843374|0.029892682|0.027908524|0.029823814|0.033656640|  
0.195963974|0.182089680|0.189402772|0.208957874|0.150524210|0.165604789|0.235100439|  
0.402932422|0.413737020|0.417050225|0.417479890|0.432556025|0.470591127|0.448357699|  
0.044300037|0.040762156|0.041814781|0.036422942|0.061783736|0.063930977|0.061112857|  
0.175828833|0.183262806|0.167392653|0.203876138|0.205751137|0.162944744|0.280567405|  
0.195990015|0.238613891|0.338771485|0.212655778|0.387638049|0.395867971|0.398375366|  
0.032622216|0.038986840|0.047798150|0.040241783|0.043526613|0.052835054|0.040721888|  
0.357873240|0.357400116|0.375636306|0.421683091|0.420103242|0.342853892|0.432028305|  
0.072997738|0.122333057|0.115925502|0.111843089|0.139506776|0.126655211|0.197909454|  
0.052699883|0.047052295|0.045766770|0.046096515|0.058412326|0.062787166|0.064281911|  
0.682776675|0.669460681|0.706062412|0.723581153|0.724345453|0.807315893|0.692498584|  
0.884888679|0.871241112|0.900913147|0.899058157|0.905270923|0.902877075|0.870550118

0.296070142 0.327169787 0.279720185 0.386992563 0.444797384 0.376891719 0.234283163  
0.409130780 0.430915968 0.421725551 0.456266910 0.471322605 0.483039841 0.462575189  
0.043697001 0.053333595 0.037924463 0.041500218 0.040328298 0.056768663 0.069023224  
0.076729788 0.081392619 0.063825157 0.062849099 0.086690601 0.090096149 0.070930440  
0.201333476 0.231992926 0.191001090 0.238816691 0.221403899 0.206949345 0.267414203  
0.969598471 0.970428354 0.972867151 0.969300353 0.972798719 0.958146604 0.961194574  
0.796960501 0.753671534 0.846016804 0.822583079 0.829133177 0.866869868 0.710473900  
0.572592317 0.614178190 0.638721582 0.591973065 0.589652592 0.717070567 0.596146550  
0.069072773 0.089689525 0.064622497 0.077221004 0.089429080 0.141474523 0.074012179  
0.049858760 0.043548798 0.066424300 0.056456488 0.057104601 0.068301513 0.086936119  
0.103635636 0.150779925 0.129062809 0.107992368 0.156848113 0.142353560 0.164998017  
0.028853276 0.027849888 0.024561580 0.026284219 0.028147153 0.032975741 0.042801641  
0.036115620 0.057776041 0.038926283 0.040950926 0.044520406 0.073416155 0.053621518  
0.127660152 0.118837903 0.137515360 0.116592276 0.126370829 0.161630017 0.146559485  
0.024708624 0.022204496 0.031813607 0.034967114 0.029387564 0.030308362 0.045627540  
0.049290885 0.056368848 0.049730619 0.065115045 0.062603567 0.053091393 0.070975801  
0.019316823 0.019930417 0.023330547 0.022739735 0.025840735 0.022427172 0.036443255  
0.078764388 0.103928704 0.091586704 0.083650320 0.094960238 0.101252902 0.152959751  
0.115661010 0.150882236 0.156180881 0.099618809 0.085881089 0.044068104 0.044399830  
0.376107217 0.396007594 0.429887667 0.403304990 0.441486177 0.642352647 0.472503166  
0.037231757 0.028722822 0.035058842 0.049375112 0.035284846 0.049894725 0.052881933  
0.314530104 0.339510190 0.390577070 0.397372959 0.362947069 0.400319719 0.393091890  
0.030072141 0.027107334 0.030981227 0.035447239 0.037484014 0.041937101 0.037812264  
0.058883248 0.058909829 0.061179341 0.066255926 0.060925901 0.060453607 0.087982530  
0.585401451 0.623269101 0.668875759 0.638221257 0.673098934 0.749334067 0.629417943  
0.096567472 0.103217004 0.056953608 0.093865384 0.146265162 0.086208221 0.111886819  
0.607236310 0.588468336 0.614799267 0.603686921 0.656648895 0.759256347 0.613342613  
0.625728672 0.645274292 0.683886549 0.601969317 0.607060503 0.679190542 0.660832930  
0.695691554 0.719997523 0.760743799 0.701349818 0.699827757 0.812227092 0.701692670  
0.039958568 0.035313048 0.043141837 0.033023816 0.042865095 0.044036932 0.038062093  
0.051222801 0.055821634 0.034826754 0.043490668 0.040637936 0.097625612 0.092606837  
0.036345230 0.048922977 0.029699180 0.047958616 0.049261340 0.060443907 0.051398643  
0.019926455 0.021563203 0.017718550 0.021699773 0.018578256 0.020285266 0.025474901  
0.053050023 0.059711658 0.050350906 0.050073915 0.056754327 0.094946335 0.057603440  
0.021896489 0.017066348 0.016793452 0.019147594 0.020649779 0.029810912 0.024652787  
0.052288635 0.047316684 0.044512047 0.049948095 0.058084358 0.072371240 0.047932641  
0.044793645 0.072616474 0.052973134 0.047713688 0.048549235 0.060331973 0.056467488  
0.022029522 0.025919123 0.025360447 0.024346309 0.024561492 0.024558625 0.027567997  
0.055206637 0.067884261 0.059223351 0.053788948 0.067363770 0.086229249 0.087550195  
0.022972523 0.025701786 0.024839616 0.024664173 0.027729064 0.039659962 0.029245190  
0.051911415 0.046051758 0.053717222 0.085760654 0.081880082 0.076870975 0.115350134  
0.084076336 0.075962014 0.073370983 0.070600137 0.102234855 0.094595919 0.129766281  
0.019645995 0.022096282 0.028206343 0.028120614 0.022849959 0.034104150 0.039677664  
0.870687640 0.907898799 0.904639689 0.914033173 0.915216686 0.923686616 0.878893002

0.046835309;0.050064719;0.052724637;0.049790743;0.058645539;0.067744666;0.057467176;  
0.505082904;0.550904514;0.560253978;0.576765759;0.571129684;0.584824798;0.591284870;  
0.051366237;0.052605357;0.062921221;0.043824993;0.057203304;0.060032910;0.072164102;  
0.046402058;0.055093645;0.050521919;0.043716317;0.051210164;0.078228440;0.084650566;  
0.559914264;0.606514387;0.574989191;0.605196894;0.614908658;0.575358274;0.610828898;  
0.125738313;0.148560726;0.168689272;0.129074522;0.190772518;0.067779494;0.194031055;  
0.654063626;0.691121500;0.682209081;0.683229857;0.662136633;0.741353571;0.725253578;  
0.022787009;0.033368428;0.031161071;0.022965140;0.025029826;0.083306230;0.037173412;  
0.253660186;0.321459560;0.338581399;0.344621873;0.323944980;0.330811133;0.393252084;  
0.032183403;0.042364044;0.037805306;0.049462653;0.051099769;0.043971863;0.047060977;  
0.163578303;0.147348355;0.164400749;0.193227149;0.152416885;0.170700184;0.208731602;  
0.061594992;0.057351560;0.057027743;0.057587577;0.075642463;0.068606106;0.071635456;  
0.322869311;0.369354351;0.400381139;0.437701610;0.390447294;0.381771424;0.437585408;  
0.829861548;0.859423570;0.821170829;0.852979713;0.848213303;0.917379155;0.857853926;  
0.035592992;0.046974839;0.034547411;0.044067414;0.043432061;0.037150335;0.048484108;  
0.052340369;0.065520006;0.059884070;0.065846854;0.095873322;0.189257482;0.067304746;  
0.073462772;0.078383422;0.097777232;0.082234648;0.091478157;0.116010780;0.090477496;  
0.869495113;0.905268471;0.906434466;0.926835598;0.892779146;0.918662684;0.896212253;  
0.389297836;0.349827541;0.375033654;0.434275725;0.367565689;0.468158593;0.427865851;  
0.022278496;0.018733950;0.020316214;0.018554871;0.017493487;0.025306728;0.037626249;  
0.088617447;0.190748892;0.095122012;0.102086847;0.158253574;0.325360424;0.181505647;  
0.047267232;0.060063063;0.067139856;0.048833082;0.065388848;0.078262000;0.083472903;  
0.021612495;0.028925381;0.028728042;0.039275102;0.029110584;0.049134241;0.042316951;  
0.043284467;0.040684210;0.051271648;0.041642943;0.051965628;0.071582331;0.047907816;  
0.073016071;0.073525075;0.060643335;0.064246094;0.079530401;0.082088995;0.088557702;  
0.030295753;0.032524433;0.025917385;0.034905344;0.034499198;0.052815969;0.198341834;  
0.047722465;0.058812949;0.052113609;0.041721543;0.070874272;0.063577837;0.051413220;  
0.425235771;0.514741574;0.435575775;0.488287908;0.557682155;0.481773719;0.522282692;  
0.042253055;0.053577636;0.035900360;0.036504845;0.039022394;0.082835048;0.049289468;  
0.029668073;0.032154538;0.032418977;0.038122837;0.033436027;0.054948774;0.034063057;  
0.120297754;0.146514691;0.117895042;0.139867562;0.189535717;0.141777215;0.204653371;  
0.045732635;0.044406421;0.038700426;0.053193321;0.054380446;0.060688931;0.057654529;  
0.502595148;0.604775278;0.576816047;0.626327197;0.590189296;0.600388202;0.626290102;  
0.026942344;0.029929642;0.028212819;0.025481741;0.026963160;0.046576303;0.037377215;  
0.027267453;0.048241953;0.024880581;0.029667867;0.034493671;0.051244990;0.037894081;  
0.716598860;0.741711120;0.783702185;0.709938757;0.680094536;0.579380554;0.727045421;  
0.400181606;0.408825698;0.424205337;0.406782267;0.400401041;0.467126523;0.456711429;  
0.030582996;0.023066915;0.028008227;0.028632140;0.028644166;0.045704140;0.028139855;  
0.026625632;0.029396557;0.029567180;0.039255494;0.025332674;0.038989065;0.042299390;  
0.673883425;0.705908845;0.768985637;0.737485258;0.862812473;0.909332269;0.797024179;  
0.072769083;0.059628131;0.054396929;0.073210779;0.081639219;0.061447330;0.095932847;  
0.044861595;0.049709140;0.042269220;0.031552678;0.048866370;0.098332869;0.047973109;  
0.087591398;0.118753475;0.107773674;0.130192562;0.122604472;0.050297025;0.158942367;  
0.022966670;0.031248409;0.035268011;0.041598725;0.057134775;0.037448916;0.023738432;

0.043158791 0.025027984 0.032477713 0.037626017 0.039851877 0.047525475 0.040514685  
0.389897864 0.495721669 0.492402349 0.448489177 0.454004504 0.653999079 0.492944342  
0.024079719 0.023531166 0.023931717 0.029777816 0.031584145 0.031940697 0.028968540  
0.031878682 0.040933498 0.041266664 0.036100623 0.037515492 0.042367667 0.060261143  
0.167502227 0.154994328 0.180766305 0.182554336 0.196435118 0.215578396 0.224149879  
0.036712137 0.060785859 0.076131021 0.018876402 0.020162222 0.015739912 0.054503296  
0.196391609 0.159164626 0.168771008 0.182815145 0.206929828 0.216380471 0.213108103  
0.021471532 0.013948993 0.017711607 0.018213444 0.021531792 0.023388879 0.023472728  
0.707235956 0.842235585 0.744032732 0.821518260 0.847760917 0.826471925 0.703792223  
0.023693970 0.026471468 0.025059647 0.022360388 0.022153780 0.029557128 0.041376480  
0.174096756 0.184955056 0.184425761 0.178704490 0.178371907 0.223445154 0.271774155  
0.022599327 0.020029496 0.021505153 0.028849684 0.025170470 0.033165951 0.029045534  
0.030255813 0.027184603 0.026126940 0.031901270 0.018675697 0.051112977 0.049263860  
0.035940899 0.042536642 0.033123101 0.040220439 0.049381512 0.055938836 0.050012496  
0.060197075 0.089398842 0.089279644 0.161127174 0.135917968 0.182567246 0.287985192  
0.019761474 0.022484937 0.028186661 0.021116208 0.027125821 0.034028662 0.043745610  
0.857563495 0.866991544 0.859991010 0.866960018 0.894736857 0.861074310 0.872217216  
0.091180670 0.098959869 0.071695378 0.075277442 0.121233670 0.339488338 0.084398173  
0.149338099 0.112035555 0.123203890 0.096560018 0.147865875 0.172201136 0.165991741  
0.956449248 0.950575659 0.956903824 0.936186498 0.935837027 0.937650745 0.928849249  
0.023455994 0.024639096 0.023645400 0.024748360 0.031810186 0.037899729 0.028429027  
0.077825065 0.082150599 0.065037393 0.072185383 0.089778281 0.226621615 0.067983922  
0.032918327 0.043632964 0.042711471 0.044132093 0.054602594 0.046726712 0.057910821  
0.053392641 0.055886034 0.062027592 0.048458634 0.062013638 0.071373153 0.066695055  
0.022700804 0.036991185 0.042149438 0.042222653 0.034951036 0.088870161 0.040807279  
0.034300759 0.036441496 0.033564750 0.044835345 0.041049180 0.047772946 0.038114073  
0.029980003 0.043165793 0.033963444 0.041472045 0.041522901 0.040458299 0.031721296  
0.288766058 0.279742094 0.304848110 0.330666494 0.333402325 0.243885003 0.348156087  
0.581281313 0.604405772 0.673231959 0.602235094 0.579604554 0.610055268 0.629418072  
0.021762766 0.021895973 0.020468431 0.023766235 0.027845754 0.026774978 0.030879908  
0.069960672 0.078078166 0.078520402 0.074524322 0.086060134 0.141697970 0.062847292  
0.042084064 0.024677067 0.031544227 0.043449097 0.032146742 0.048293321 0.058174645  
0.942095578 0.940791086 0.950012776 0.958531220 0.954418017 0.872095450 0.900369601  
0.053780824 0.042147262 0.055484605 0.039938331 0.040198292 0.070570605 0.050814989  
0.034445295 0.034189548 0.038910902 0.035598168 0.050278452 0.052577473 0.047885400  
0.030838326 0.044680708 0.041771401 0.036420398 0.052704364 0.103446081 0.050010568  
0.140844806 0.136956101 0.142952596 0.123688818 0.140824420 0.146847229 0.220446849  
0.738713136 0.707561105 0.759328009 0.798890162 0.793847315 0.822419116 0.733455462  
0.787631889 0.808176477 0.802210884 0.828803830 0.854343500 0.853995262 0.761919821  
0.041960691 0.082995191 0.054842519 0.064894826 0.139429338 0.078551633 0.108961302  
0.628024736 0.660440380 0.718524248 0.744219606 0.763958513 0.796019567 0.715119176  
0.297731626 0.334647203 0.336235440 0.340491978 0.297647254 0.335101951 0.414451869  
0.041531603 0.054072544 0.047538300 0.046077327 0.053921189 0.053990724 0.065458760  
0.080664532 0.116954741 0.114012050 0.097426719 0.125562124 0.225210413 0.091352781

0.036441464|0.055632560|0.057971687|0.039857391|0.046536417|0.132457109|0.048612698|  
0.050815215|0.046314019|0.047743763|0.039607539|0.045533660|0.079990552|0.058874460|  
0.053666187|0.057759532|0.059934394|0.051042097|0.059472207|0.094003405|0.081374918|  
0.316386038|0.268347956|0.270806190|0.312278143|0.311351565|0.342022113|0.286303507|  
0.037811182|0.035617485|0.038283961|0.045213937|0.039784022|0.061373682|0.032331065|  
0.025147020|0.020488989|0.026633877|0.028021334|0.028925216|0.032658306|0.026512721|  
0.498025842|0.493901575|0.496161889|0.474903596|0.497439817|0.552458494|0.496010732|  
0.752220941|0.699141539|0.789537904|0.785643742|0.769999087|0.873355763|0.717887395|  
0.056457216|0.048987532|0.045494035|0.056054039|0.053498450|0.074972088|0.105950925|  
0.045616938|0.052615116|0.054547680|0.053159588|0.042903311|0.097223849|0.043171956|  
0.823856556|0.759831754|0.809425391|0.825575723|0.837800945|0.843022543|0.824476156|  
0.037964893|0.053533004|0.038702756|0.029892020|0.042300009|0.048893280|0.066115618|  
0.051848805|0.037309419|0.046728753|0.037554090|0.043671661|0.071664239|0.060338832|  
0.056131423|0.056597260|0.047689838|0.056050932|0.067682730|0.088235441|0.065370532|  
0.778307268|0.753496197|0.824493720|0.778406716|0.710450634|0.531371307|0.747469673|  
0.071803354|0.127727106|0.104524990|0.096528070|0.113849559|0.233130075|0.128277510|  
0.458229127|0.555915315|0.567476798|0.564038772|0.591736637|0.587700370|0.562053118|  
0.077745316|0.105074437|0.110629156|0.097528299|0.120633047|0.267542183|0.103403778|  
0.076632573|0.149624625|0.085565196|0.109376616|0.097659209|0.147259268|0.092836086|  
0.342653578|0.339925505|0.406969915|0.344755334|0.354930782|0.604191461|0.372178574|  
0.027365080|0.025847990|0.025243779|0.024438275|0.024851520|0.035479606|0.043176970|  
0.042667885|0.047467172|0.060935248|0.054858163|0.052964001|0.055775333|0.068200621|  
0.545911196|0.642049537|0.679035757|0.623469875|0.639298063|0.760976937|0.662118428|  
0.882863112|0.871689601|0.890782240|0.901484532|0.875507640|0.910047012|0.872659778|  
0.643744039|0.701001014|0.700960708|0.771961388|0.681879841|0.748407304|0.676390798|  
0.098966692|0.118780276|0.117470208|0.121052924|0.119440844|0.114285959|0.172291254|  
0.471653793|0.439388621|0.474244690|0.488978515|0.559916780|0.446131010|0.493130968|  
0.361548350|0.392069199|0.451299620|0.349550702|0.454727254|0.467057402|0.454618643|  
0.027606457|0.027827268|0.039967298|0.038033637|0.037338504|0.050877559|0.034748178|  
0.492712952|0.552312178|0.472157707|0.670878500|0.523967621|0.595354058|0.604757092|  
0.024622027|0.031919794|0.022399917|0.028044920|0.024445799|0.038871310|0.043584246|  
0.038869460|0.092652806|0.074892982|0.068189044|0.079481536|0.141190380|0.108742662|  
0.035838262|0.057263565|0.057387762|0.040363909|0.053522272|0.061074471|0.059302686|  
0.033732021|0.041200718|0.031281086|0.055029756|0.039598344|0.052037025|0.046251223|  
0.065010047|0.068948217|0.075402933|0.077484568|0.073675022|0.086706230|0.092195113|  
0.165903907|0.219719460|0.190480777|0.180691975|0.178691789|0.202088480|0.249237379|  
0.036350158|0.023601671|0.030810734|0.028584464|0.039669706|0.055237608|0.036748242|  
0.045177920|0.047942537|0.051664333|0.063550134|0.051712771|0.056816037|0.075736099|  
0.439413035|0.608854373|0.613870018|0.630588249|0.618915812|0.585918509|0.628730089|  
0.260298274|0.178248006|0.243935413|0.188359880|0.311823814|0.334955974|0.336614267|  
0.033633009|0.039803273|0.035022073|0.030704201|0.041206470|0.058964733|0.060839961|  
0.262599211|0.340818782|0.351193074|0.293003225|0.320625249|0.348520216|0.380906158|  
0.028443604|0.025547361|0.031249644|0.022848030|0.032745930|0.036506448|0.039026689|  
0.030916430|0.031919404|0.028999568|0.032891080|0.038267171|0.041362418|0.031457939|

0.031059531|0.030216423|0.041343490|0.025315261|0.041787740|0.048852265|0.047310692|  
0.036254727|0.048911409|0.046391620|0.032541829|0.045975364|0.084058536|0.044480759|  
0.494882426|0.548118279|0.476033748|0.556233511|0.532269586|0.641811838|0.554661992|  
0.822370485|0.841999416|0.853818298|0.856294336|0.865234332|0.848608876|0.867310804|  
0.467720817|0.443888869|0.469801780|0.389516740|0.440318211|0.527193201|0.472576352|  
0.048371113|0.029268805|0.023679727|0.036732976|0.042039046|0.066970519|0.079227551|  
0.037336542|0.046394141|0.043850880|0.057250340|0.055472058|0.047219563|0.049440236|  
0.482258890|0.515436343|0.577433090|0.630964634|0.542986863|0.585154020|0.503557511|  
0.048192990|0.046256350|0.039819072|0.044282433|0.052931719|0.060315128|0.069608682|  
0.114967692|0.130012764|0.117191984|0.082009089|0.168054080|0.147444446|0.122547335|  
0.451527947|0.467734802|0.477942503|0.446953842|0.420649785|0.562294896|0.464533282|  
0.051228387|0.071935663|0.052611220|0.068306135|0.061781757|0.144308822|0.068395580|  
0.078745943|0.072409191|0.083386174|0.098976530|0.097093235|0.103986700|0.114789373|  
0.034886154|0.043767563|0.040036255|0.037631384|0.052204435|0.069712010|0.039583717|  
0.067544607|0.086724572|0.112932556|0.120716241|0.089758622|0.072793620|0.146709531|  
0.030896142|0.028916675|0.030498038|0.033365004|0.033800939|0.046244300|0.032385984|  
0.226772831|0.257615365|0.241041737|0.281448163|0.308962032|0.245989688|0.304259531|  
0.273883562|0.315754311|0.299656068|0.312155695|0.435771038|0.265504398|0.359722729|  
0.140941133|0.114078456|0.145621345|0.128912827|0.148857610|0.138299244|0.187759928|  
0.019513202|0.027710779|0.022474841|0.018078940|0.023209527|0.036860309|0.030789503|  
0.040239491|0.048897733|0.053611830|0.054856831|0.047236672|0.063823056|0.084061540|  
0.849889332|0.888981262|0.887909917|0.893743295|0.874377929|0.925705591|0.839438708|  
0.024660988|0.033594480|0.024350480|0.029091915|0.038068768|0.040077531|0.030559136|  
0.827864502|0.891602839|0.876568913|0.890099589|0.865506056|0.931050383|0.883492913|  
0.148025782|0.163536946|0.178886660|0.155976240|0.168643840|0.160234499|0.187153912|  
0.858654923|0.911198578|0.844436692|0.905373514|0.913854386|0.906033321|0.891875538|  
0.057320417|0.052526740|0.063938594|0.036301705|0.082766057|0.075970813|0.076736316|  
0.557239207|0.550718464|0.576087103|0.595880984|0.678975996|0.655268118|0.628557632|  
0.017193584|0.018797103|0.023787946|0.016356390|0.047289515|0.026183275|0.024042221|  
0.019271827|0.020215523|0.018742884|0.017946257|0.018746311|0.033600785|0.030782952|  
0.726144796|0.765703665|0.678779066|0.714397512|0.790725581|0.846977388|0.750617697|  
0.796538954|0.810400541|0.862832786|0.908082817|0.859705357|0.910095378|0.827504401|  
0.041249173|0.035675670|0.033742386|0.045795524|0.032522841|0.051082975|0.042480836|  
0.842496043|0.880421425|0.882913658|0.885605891|0.883480694|0.875071290|0.880778331|  
0.041997891|0.041286742|0.036102650|0.037969032|0.050147624|0.049827131|0.056990076|  
0.028091243|0.032378708|0.038183184|0.024314429|0.030895594|0.039207989|0.038565285|  
0.032328899|0.028692227|0.025093145|0.023992781|0.025554385|0.032970503|0.032835973|  
0.025152811|0.031226447|0.022965465|0.018612305|0.020568757|0.037671787|0.032800814|  
0.028486064|0.041229530|0.042127904|0.029931184|0.040814270|0.073283087|0.029333174|  
0.046674519|0.046935077|0.052014357|0.054039134|0.043005352|0.052741223|0.045862455|  
0.039493476|0.051067646|0.043526773|0.042585432|0.037960624|0.068552828|0.058639371|  
0.457966962|0.487097379|0.526773937|0.485877130|0.516642509|0.490131499|0.527148790|  
0.869977543|0.817188069|0.860218195|0.868814569|0.798430693|0.821700211|0.795771378|  
0.696943750|0.661588161|0.751497651|0.728308160|0.774293049|0.778237572|0.762237206|



0.162846403!0.189741749!0.251265804!0.269277212!0.203267860!0.192534803!0.322698834!  
0.151043099!0.115433514!0.161372001!0.143390114!0.219122251!0.058869948!0.206548620!  
0.111983011!0.110862781!0.122018768!0.129088485!0.151229444!0.076109827!0.144097314!  
0.729067560!0.736277794!0.764547807!0.745383717!0.740146156!0.825702947!0.692615632!  
0.739646833!0.809076243!0.781976636!0.805753019!0.809426688!0.800902344!0.765684861!  
0.226744090!0.233642453!0.233151574!0.180988991!0.201580891!0.287954679!0.318811852!  
0.052404543!0.073425676!0.061056636!0.053169593!0.107318507!0.187633459!0.086234060!  
0.631898940!0.617726534!0.627341068!0.691592540!0.642026462!0.625550826!0.614622529!  
0.514678313!0.567453089!0.516249426!0.531371114!0.519901289!0.631815124!0.504719555!  
0.216736269!0.211376260!0.206315696!0.226265362!0.213092675!0.304468564!0.308558444!  
0.174446146!0.422996341!0.496198597!0.390348894!0.424279823!0.277726618!0.366022882!  
0.039050309!0.052980744!0.033873968!0.056036392!0.037335346!0.113304920!0.062506115!  
0.943320741!0.962334966!0.961336902!0.969623957!0.967944997!0.960816518!0.958963487!  
0.285637095!0.272310418!0.287281304!0.292436849!0.291277918!0.278050236!0.340767432!  
0.023770710!0.026925058!0.031804188!0.024055207!0.028834717!0.034317088!0.043050791!  
0.526792239!0.502711107!0.535467967!0.512125254!0.546805339!0.551448377!0.565409929!  
0.064292739!0.199384492!0.201276931!0.030725603!0.047585114!0.183667720!0.045607994!  
0.032024579!0.032896930!0.030472451!0.033929253!0.036501580!0.046404807!0.035758736!  
0.075406120!0.110392280!0.057486351!0.057349026!0.068922309!0.148278710!0.076543148!  
0.658194422!0.613659565!0.724233904!0.621386532!0.700272359!0.731002336!0.590907424!  
0.923633844!0.912705837!0.918760781!0.924636476!0.928834903!0.744395192!0.809290120!  
0.063564452!0.049601906!0.071940352!0.074560987!0.071200404!0.095916959!0.100386138!  
0.030695803!0.034217884!0.033473224!0.031225697!0.030230597!0.039389213!0.036651496!  
0.044308473!0.049268875!0.049996884!0.052014923!0.051545208!0.066252154!0.078676634!  
0.139300920!0.163739729!0.145617712!0.187735950!0.214572287!0.134171015!0.219997946!  
0.670575087!0.690701321!0.676305927!0.661081533!0.746481757!0.790829333!0.676740583!  
0.204913698!0.204205053!0.213872101!0.242966667!0.214514588!0.176605601!0.257034425!  
0.582312459!0.566097908!0.578826011!0.571263415!0.642115173!0.623057301!0.613674882!  
0.109120567!0.068921255!0.111014569!0.080842923!0.153838212!0.154623727!0.180900255!  
0.038706362!0.046252764!0.050977619!0.048823144!0.050702711!0.056133209!0.067722153!  
0.033143799!0.031643292!0.042436952!0.038055694!0.065790298!0.044398696!0.046697810!  
0.232193813!0.246002890!0.277568296!0.278927570!0.275462794!0.264313900!0.325508085!  
0.779545149!0.797284766!0.859368622!0.809786992!0.839593590!0.907243371!0.810168907!  
0.100175067!0.090823504!0.104795623!0.107349192!0.101740587!0.102633858!0.146049485!  
0.695240508!0.692325117!0.673803593!0.682139728!0.710682372!0.750152489!0.641222697!  
0.021115870!0.019267683!0.022785497!0.028062786!0.022688815!0.030850476!0.031687567!  
0.071143820!0.087577631!0.080224928!0.069635462!0.084382839!0.101890950!0.099063311!  
0.044714964!0.067484466!0.059197303!0.064776576!0.065134777!0.053173135!0.075413566!  
0.546349617!0.557164306!0.607449894!0.571057947!0.554109789!0.570562258!0.590096080!  
0.027633097!0.025874209!0.021706393!0.021283085!0.027849842!0.028481805!0.032383490!  
0.033874124!0.053365246!0.102366019!0.082355725!0.104781517!0.072883138!0.091401016!  
0.109914620!0.147903065!0.094075467!0.089856035!0.139254406!0.212435335!0.120701583!  
0.660984718!0.632956282!0.666895059!0.668476031!0.648486816!0.715952992!0.647085769!  
0.063992267!0.078053347!0.061700292!0.068772002!0.072238920!0.079707538!0.116065500!

0.691271160|0.674573861|0.676818868|0.624173956|0.651181927|0.699545057|0.742596135|  
0.456623616|0.444103251|0.458904820|0.435146234|0.578032063|0.599112564|0.461480093|  
0.701047658|0.726213127|0.714707944|0.760425196|0.817259539|0.871932624|0.686647401|  
0.038758645|0.051808124|0.039971347|0.039676357|0.045807162|0.052336145|0.058770012|  
0.033963584|0.032838308|0.031277682|0.035154153|0.046449491|0.036374364|0.053126446|  
0.689491201|0.684844011|0.753198733|0.715343881|0.736476035|0.836749669|0.646601984|  
0.152582161|0.117136130|0.160261454|0.143637003|0.137536799|0.189213302|0.157390986|  
0.300962987|0.291590374|0.337139443|0.322253292|0.363867832|0.460392583|0.320988389|  
0.265050240|0.216643550|0.122488448|0.226630566|0.160925050|0.155027598|0.164799830|  
0.052716246|0.067148247|0.062079396|0.043737300|0.057053674|0.068915369|0.073585023|  
0.036179862|0.034423797|0.031506164|0.050590297|0.037653829|0.042758144|0.044733221|  
0.025440771|0.024416603|0.020741650|0.022980611|0.023837789|0.038659831|0.031320382|  
0.085030527|0.084592875|0.067497237|0.071117171|0.085477646|0.124783231|0.070996533|  
0.025233172|0.042737555|0.022978361|0.031938013|0.042231832|0.045670340|0.042914168|  
0.122567410|0.108105569|0.139615825|0.108260015|0.123639258|0.160279457|0.193756165|  
0.133189504|0.144031060|0.135266313|0.128240788|0.176111155|0.054595833|0.164793326|  
0.027867379|0.027817040|0.029932287|0.032446359|0.045364238|0.028932494|0.044314074|  
0.029139922|0.025734771|0.022913057|0.026768332|0.024930359|0.035745150|0.036898214|  
0.816736500|0.805428679|0.867055857|0.827516097|0.842920954|0.812914694|0.836937342|  
0.884166285|0.896646419|0.919750985|0.900869475|0.919385411|0.902426399|0.877824735|  
0.056165017|0.037023851|0.055082807|0.056381726|0.058154559|0.087029378|0.095872227|  
0.136764412|0.154855219|0.195871331|0.172101334|0.208916362|0.245670585|0.245752530|  
0.033989473|0.044232858|0.041581984|0.036660657|0.053632864|0.048692804|0.056910800|  
0.039645330|0.054867441|0.037713770|0.030060771|0.062767447|0.082770497|0.038490861|  
0.062282399|0.068107730|0.065207540|0.062064066|0.066273546|0.078063631|0.085647123|  
0.052564140|0.053995197|0.054500757|0.050705131|0.057239350|0.148989476|0.055173870|  
0.017176556|0.020040564|0.021109249|0.024614483|0.023218474|0.026843141|0.026590431|  
0.071745523|0.063279503|0.057743227|0.078083843|0.053072926|0.071778081|0.103061670|  
0.024546002|0.031340350|0.029636648|0.029818814|0.029908198|0.053996116|0.036588434|  
0.025734511|0.028928414|0.028285771|0.022231235|0.037047150|0.037100428|0.036171896|  
0.641158982|0.687423320|0.713439857|0.690931120|0.706840795|0.738096222|0.668411404|  
0.040664716|0.032081228|0.041985261|0.038724363|0.039910868|0.058086581|0.049706376|  
0.027864641|0.034182426|0.030095002|0.036971806|0.031931442|0.040934002|0.037345381|  
0.088243932|0.078949216|0.046357875|0.104238256|0.126210355|0.111211717|0.103329323|  
0.019083010|0.019975146|0.017238903|0.024327146|0.024314797|0.029084390|0.026759042|  
0.027609217|0.033561898|0.033818803|0.028999322|0.037487081|0.038405294|0.037726755|  
0.104719340|0.107321648|0.117177603|0.130213025|0.100318838|0.105829539|0.150726300|  
0.276780025|0.299687272|0.310234305|0.297213662|0.300003830|0.358718271|0.357608517|  
0.031873473|0.044017810|0.038216186|0.046962958|0.036002639|0.073905168|0.051056611|  
0.101086541|0.081856898|0.101285373|0.133302904|0.107648776|0.156253294|0.117252516|  
0.041643706|0.026742867|0.046066527|0.032334060|0.052578712|0.050229417|0.060278687|  
0.821236886|0.857328753|0.831336165|0.852281610|0.840385211|0.844959981|0.816490654|  
0.045132242|0.044624414|0.056770160|0.046010347|0.042656444|0.049728326|0.077805065|  
0.470967743|0.167116082|0.554859889|0.263911096|0.230676753|0.061218654|0.257972560|

0.792524074|0.850073938|0.809289782|0.838479135|0.851843906|0.906969889|0.808744288|  
0.797577251|0.816176049|0.837318437|0.847669294|0.835493929|0.851830735|0.836243732|  
0.766105700|0.822044283|0.821683084|0.826336722|0.823052867|0.844080547|0.770302459|  
0.054042138|0.061101543|0.062433314|0.057928973|0.057936238|0.089726650|0.097549674|  
0.035182982|0.036605368|0.035187614|0.032732022|0.033234383|0.065355071|0.044181323|  
0.344926495|0.368747852|0.332562520|0.377961919|0.406713750|0.378715601|0.408858438|  
0.670709233|0.725820689|0.722541059|0.686782229|0.757401151|0.754926397|0.663959571|  
0.074351469|0.076011164|0.070673449|0.077220101|0.081532965|0.098309683|0.102289726|  
0.026291980|0.024726932|0.024787447|0.024079016|0.030758748|0.041650202|0.046723398|  
0.737032331|0.790564759|0.758989225|0.783987636|0.815459135|0.830633915|0.721559722|  
0.568715989|0.615476397|0.601520305|0.579520837|0.620485623|0.682128171|0.562873798|  
0.030241180|0.040047175|0.031684007|0.030636887|0.037177652|0.038834350|0.060303878|  
0.061053463|0.070270333|0.046523741|0.043429473|0.073201350|0.187689659|0.054432269|  
0.054388406|0.059489591|0.060165183|0.062033233|0.057961779|0.080180086|0.076023601|  
0.811287993|0.818976250|0.842594486|0.772339324|0.896657353|0.887126876|0.839384529|  
0.017917401|0.016961283|0.022501399|0.021674010|0.027552714|0.023952838|0.033052987|  
0.126690849|0.091295964|0.153828318|0.106051134|0.091022980|0.088931904|0.114457062|  
0.865938820|0.887037682|0.874852058|0.894195942|0.892505833|0.901259210|0.827604774|  
0.052106549|0.059496105|0.043273053|0.049293063|0.052089877|0.086865046|0.068678404|  
0.782731050|0.785022750|0.806075104|0.825202660|0.808792415|0.808589307|0.800184777|  
0.022735524|0.027848896|0.021908565|0.024470790|0.028301177|0.041760880|0.028889758|  
0.051616235|0.061071110|0.067078616|0.053398500|0.055651658|0.090376159|0.066769813|  
0.082806656|0.151336228|0.097750225|0.074525934|0.117504898|0.277860956|0.092294325|  
0.034201243|0.030751318|0.036639856|0.031044689|0.041168544|0.055329403|0.045999187|  
0.019715644|0.024358580|0.024761617|0.020440845|0.022316091|0.030189715|0.023774126|  
0.860095741|0.866769233|0.864750599|0.890680098|0.879074129|0.883897105|0.848495750|  
0.799923438|0.824446470|0.801166286|0.856005729|0.781508496|0.889129250|0.810244267|  
0.408841307|0.415734088|0.422861521|0.447843698|0.508608401|0.416551783|0.484102919|  
0.072296807|0.072853259|0.077832814|0.077603196|0.074592899|0.068104379|0.139518019|  
0.049050526|0.041461539|0.045413644|0.042955249|0.047914507|0.068182731|0.051940052|  
0.151654689|0.152866548|0.162777046|0.166573183|0.153998164|0.113602032|0.236732229|  
0.024179868|0.032675046|0.019730302|0.025402133|0.021278301|0.037267334|0.026161995|  
0.430157156|0.476357794|0.501007624|0.495491571|0.523668763|0.474120919|0.525142475|  
0.082504460|0.086799589|0.078550083|0.110204149|0.077247666|0.112698952|0.134848994|  
0.831617510|0.739922280|0.756268432|0.726612650|0.689708483|0.774398665|0.795911536|  
0.559416887|0.497606345|0.736648045|0.275386558|0.305913964|0.428900043|0.413049860|  
0.027666149|0.036150951|0.039171471|0.074810194|0.039433063|0.060132015|0.061780477|  
0.038311248|0.052657847|0.040227056|0.043665730|0.049282542|0.099050051|0.050920803|  
0.194602984|0.206072640|0.194402385|0.191973772|0.256008358|0.265533102|0.272087226|  
0.546748098|0.585126108|0.590649585|0.539490213|0.667926809|0.692641969|0.572160460|  
0.024426300|0.024264046|0.023841531|0.018405836|0.023058136|0.032643611|0.038046487|  
0.038042324|0.043200678|0.047125562|0.041988138|0.034636576|0.057928950|0.044856083|  
0.037160091|0.044486475|0.035523224|0.033294819|0.052145981|0.063453366|0.045293802|  
0.029579106|0.032372127|0.029943740|0.037403973|0.027330356|0.041895799|0.032697452|

0.023709388;0.024057052;0.033391104;0.027109726;0.028023339;0.037863428;0.033625879;  
0.049353723;0.034093713;0.031483989;0.045691331;0.035565242;0.036310576;0.049700271;  
0.016427683;0.020698109;0.016786791;0.020809505;0.019601095;0.020962367;0.023312431;  
0.090489082;0.076494897;0.088487519;0.140200738;0.105636289;0.112028949;0.104937178;  
0.786774201;0.804232263;0.809085203;0.791162257;0.873487405;0.903850593;0.773104599;  
0.030321172;0.041800681;0.031618815;0.044393246;0.055265186;0.031676307;0.045768972;  
0.431316267;0.500437514;0.528398875;0.495190747;0.510672310;0.516069186;0.555542412;  
0.079775303;0.073956290;0.088291066;0.066621928;0.087947775;0.109377344;0.136414821;  
0.076021263;0.083604153;0.079609868;0.072472656;0.072454641;0.089438053;0.091212130;  
0.448884878;0.472100926;0.444748039;0.485961702;0.528991102;0.434765023;0.464575687;  
0.542579945;0.588072051;0.608828976;0.592437362;0.579611920;0.585830851;0.558856609;  
0.826940868;0.882202296;0.886382348;0.857036241;0.898675889;0.928168531;0.815156098;  
0.266645463;0.308997783;0.261267740;0.290675830;0.341789277;0.237684391;0.352777858;  
0.438659979;0.479308627;0.349197485;0.404371411;0.513252830;0.536182187;0.486794708;  
0.553381830;0.525825343;0.670103770;0.623837511;0.643173799;0.665387440;0.613126913;  
0.024371828;0.020432025;0.026171018;0.020135719;0.031751811;0.023078877;0.037079381;  
0.025852290;0.030659136;0.028447611;0.029772632;0.032226913;0.040593566;0.039310089;  
0.064875104;0.061567579;0.057277149;0.058923954;0.075782501;0.074512405;0.063407193;  
0.050415457;0.060163406;0.075013856;0.065478952;0.068226233;0.076018752;0.059349476;  
0.687515620;0.773814306;0.830193947;0.768275156;0.835005024;0.823063855;0.746876176;  
0.026914463;0.023090371;0.023809790;0.027370640;0.025836477;0.032358542;0.035709083;  
0.771515757;0.832356680;0.803379549;0.878064765;0.852042993;0.891760060;0.856663977;  
0.025110359;0.039480298;0.031669022;0.038147449;0.028187186;0.047643792;0.030934499;  
0.025049538;0.023978844;0.026062592;0.022915297;0.031107667;0.037571841;0.032768266;  
0.031355962;0.034220024;0.046480810;0.034982156;0.043605993;0.052151447;0.077412025;  
0.081730758;0.052214103;0.076326696;0.058018231;0.090529365;0.099687436;0.078498780;  
0.029917838;0.029626540;0.031820338;0.023939344;0.030917400;0.032795427;0.035981855;  
0.071212512;0.054313593;0.049411548;0.054132156;0.067085925;0.071741123;0.094482376;  
0.033511321;0.046574822;0.040546162;0.032495822;0.077527325;0.397368129;0.061189988;  
0.525955828;0.482931276;0.487506974;0.459025857;0.551783869;0.660921028;0.530245866;  
0.863753320;0.889718546;0.861808071;0.911055209;0.879741886;0.914776796;0.905546765;  
0.482562013;0.588112098;0.600788737;0.618672842;0.555446589;0.529442474;0.537049087;  
0.442655774;0.465685289;0.486107059;0.441368492;0.459532912;0.506735782;0.488394885;  
0.742474094;0.796013070;0.725023171;0.769499644;0.807720114;0.844197424;0.749752849;  
0.837982040;0.830466063;0.860954620;0.882582636;0.847338242;0.918172158;0.783523114;  
0.892435149;0.903248463;0.914663186;0.918576522;0.911185123;0.926307532;0.878913348;  
0.422680520;0.404883427;0.438640129;0.375569953;0.458764105;0.487399152;0.410953352;  
0.053763189;0.068190532;0.054404550;0.053196933;0.067823733;0.166281633;0.056763175;  
0.380117272;0.378167057;0.380437349;0.415188165;0.420436122;0.450742395;0.439511841;  
0.332325547;0.458208153;0.350946047;0.404554639;0.459288008;0.432337118;0.443381195;  
0.308347747;0.318681241;0.331504423;0.241798815;0.325850461;0.431875193;0.276884162;  
0.139118792;0.121766383;0.120801793;0.121247273;0.156646990;0.151706100;0.174963045;  
0.807905368;0.848417064;0.855802307;0.841786961;0.862018079;0.932312550;0.820673336;  
0.779317954;0.831075145;0.804781813;0.843402854;0.835568386;0.900828753;0.790823207;

0.019244446 0.018439365 0.025361652 0.021576546 0.023166304 0.023315110 0.026168214  
0.038023093 0.040873113 0.052580466 0.053761781 0.038445860 0.054022486 0.059312750  
0.242016059 0.227272055 0.278549790 0.248614531 0.283713109 0.176281378 0.322969387  
0.092073456 0.073856992 0.080823128 0.075829761 0.074646030 0.161477361 0.064597879  
0.054498851 0.046643400 0.052412910 0.044285614 0.068624178 0.072618862 0.070456671  
0.304505979 0.317876626 0.280016953 0.344931114 0.317587946 0.317666302 0.339964897  
0.060155359 0.075928717 0.051589792 0.054987109 0.063846253 0.090608872 0.076729779  
0.022855296 0.019477567 0.021126895 0.023180449 0.018701530 0.028835683 0.037222687  
0.027698219 0.033949107 0.031488201 0.027646551 0.039726165 0.045167371 0.044266752  
0.051373547 0.070428260 0.049512148 0.047847015 0.069821462 0.175754293 0.053196800  
0.016906273 0.015504951 0.012858141 0.016774507 0.025016840 0.020660727 0.028680585  
0.027142271 0.040681781 0.030014529 0.036643224 0.045359384 0.032447997 0.052159600  
0.065562495 0.088790589 0.067878465 0.064142823 0.093397040 0.136954959 0.082589928  
0.101235804 0.104713221 0.092018810 0.108494938 0.105186949 0.095932993 0.141180425  
0.035127791 0.023166607 0.034658841 0.033060061 0.348776244 0.028003712 0.330509519  
0.027779963 0.031846238 0.029387911 0.023828493 0.032891857 0.040593156 0.039076749  
0.043973133 0.054665372 0.042220101 0.044549447 0.060194509 0.069929399 0.067414835  
0.602103622 0.681985267 0.703499619 0.648964829 0.687649221 0.822783384 0.662337324  
0.026692344 0.042347112 0.031188365 0.027390216 0.036678150 0.034043976 0.033646169  
0.021084239 0.029489887 0.019840335 0.026554559 0.021978378 0.027740357 0.031670804  
0.063374771 0.063411435 0.069961853 0.070182589 0.069845171 0.082998770 0.087916200  
0.856228532 0.848494212 0.872618617 0.504278008 0.590891324 0.573966932 0.812998253  
0.949960333 0.944598201 0.953136955 0.943509195 0.952570998 0.938983711 0.944320263  
0.650743351 0.697444846 0.619404505 0.654582977 0.689676767 0.679242722 0.667771328  
0.053200246 0.050798017 0.062539384 0.069934361 0.061603658 0.059214429 0.064909632  
0.031200415 0.037856517 0.041069587 0.032213000 0.050101464 0.047076267 0.028330350  
0.688369325 0.803353294 0.890463270 0.795164693 0.920918522 0.848564548 0.888494309  
0.049303500 0.045443328 0.045687501 0.057296878 0.048628863 0.066347966 0.085195448  
0.584026351 0.602629432 0.684757244 0.179811757 0.292381565 0.382400701 0.404060065  
0.641595523 0.653407457 0.661245105 0.694610716 0.701506847 0.677960852 0.680417763  
0.823720556 0.839956387 0.855033548 0.856747579 0.865365659 0.909636607 0.819339625  
0.019716306 0.027156138 0.018421973 0.025031831 0.019585968 0.021437012 0.045190387  
0.659627700 0.767095497 0.745715444 0.752611409 0.733700762 0.774260690 0.709111385  
0.021622401 0.027107338 0.025069069 0.026952076 0.027179190 0.026311293 0.024316563  
0.653304721 0.595183046 0.714466470 0.690496175 0.680971769 0.687944544 0.712226093  
0.029747512 0.028498932 0.038423730 0.028613958 0.025663025 0.029292124 0.036621419  
0.820478769 0.866610523 0.856790974 0.815880452 0.851039722 0.872325709 0.847397535  
0.045688587 0.033665804 0.047407280 0.050354876 0.036961711 0.060319182 0.075460052  
0.064391644 0.066212678 0.072618100 0.081747546 0.080465973 0.072008705 0.130036139  
0.814948153 0.793456114 0.797423358 0.777002138 0.759813689 0.813830321 0.826641200  
0.776400578 0.790312598 0.803110531 0.767557972 0.817767875 0.787229583 0.731661402  
0.775814371 0.775589713 0.793680224 0.808214955 0.790609135 0.832030318 0.807621802  
0.363049123 0.342424818 0.338941304 0.055255036 0.078025465 0.067686442 0.471674735  
0.035785018 0.039114822 0.047907119 0.043524218 0.033111687 0.036309661 0.132121789

0.021402225;0.035510180;0.030890430;0.038348753;0.028570984;0.039298033;0.028650077;  
0.057064772;0.049481346;0.040586482;0.054087810;0.085439339;0.115630198;0.062872176;  
0.096851435;0.099212781;0.112172767;0.114613788;0.127733174;0.135108612;0.135212444;  
0.024827299;0.032927164;0.026798535;0.030179965;0.034368578;0.032808038;0.035912287;  
0.087199033;0.109510960;0.104850126;0.104310075;0.097588451;0.114423910;0.114534703;  
0.063527979;0.095959709;0.076208936;0.069042702;0.072773083;0.119148574;0.096540584;  
0.041891937;0.039496712;0.041819297;0.042730221;0.038841785;0.048190627;0.051963768;  
0.122345459;0.145040490;0.115738820;0.124813356;0.136517674;0.157224078;0.128409883;  
0.036749122;0.055393447;0.042897569;0.038463992;0.045237809;0.044426478;0.053461645;  
0.401318410;0.437055310;0.506696771;0.482429730;0.452888248;0.514394464;0.460910900;  
0.026027207;0.023097421;0.025630202;0.025580779;0.027434095;0.037027748;0.032334528;  
0.193143404;0.221182795;0.187818424;0.230391807;0.271285014;0.186564630;0.273435166;  
0.708625403;0.765805457;0.620954060;0.692444470;0.771619041;0.799747485;0.673178055;  
0.060158448;0.085525287;0.063816099;0.069873913;0.084882402;0.122715010;0.100847249;  
0.493677972;0.438137180;0.481692646;0.502433115;0.523092136;0.609132846;0.463682861;  
0.073304916;0.068131012;0.078334297;0.060893987;0.058841786;0.088192286;0.080277031;  
0.026493488;0.029542633;0.026983783;0.029582061;0.029117399;0.043149944;0.032537947;  
0.050924317;0.064245812;0.071795197;0.063816797;0.072932057;0.066852009;0.059935456;  
0.131318546;0.141484648;0.149720739;0.154930326;0.168630476;0.136009452;0.209390375;  
0.031087214;0.026691296;0.027323347;0.023125368;0.027085999;0.034035684;0.034685891;  
0.831619881;0.882752757;0.883072127;0.899761642;0.926182120;0.939228450;0.824676001;  
0.020905438;0.017875447;0.017632120;0.019034008;0.021142625;0.032009491;0.026411305;  
0.030660085;0.036562405;0.032003321;0.039155336;0.036052747;0.039541929;0.049455298;  
0.456950901;0.390522624;0.394771581;0.380342201;0.491836410;0.586096671;0.410049125;  
0.027120674;0.041244028;0.036296101;0.032301907;0.044986993;0.037234128;0.039961960;  
0.400516081;0.429265552;0.463474510;0.399364461;0.416282685;0.515357606;0.501570660;  
0.047071759;0.050554875;0.046923273;0.051577888;0.050567505;0.085323150;0.067541953;  
0.149956253;0.173186192;0.132958288;0.197085683;0.188106780;0.139648998;0.261671526;  
0.888609407;0.932209418;0.915617862;0.906842533;0.905729172;0.937038261;0.905782869;  
0.026318828;0.026115843;0.020666416;0.022048980;0.023421528;0.026096306;0.039471974;  
0.709554678;0.755178345;0.725273222;0.731912660;0.704513274;0.772553877;0.725685200;  
0.028205432;0.030321026;0.045743075;0.065816730;0.074019920;0.028439220;0.096407370;  
0.037236234;0.029535500;0.036668346;0.029156778;0.039084864;0.042448444;0.035941953;  
0.468869674;0.542324876;0.495360241;0.505569855;0.564343599;0.533316419;0.513442696;  
0.940653463;0.927845243;0.940347645;0.951911578;0.944308673;0.860282359;0.924096042;  
0.038416566;0.058949213;0.032943095;0.031073532;0.139453807;0.070807140;0.047634242;  
0.190322553;0.158368557;0.132624089;0.127629283;0.296346791;0.284421151;0.169964723;  
0.032079953;0.033679622;0.042000612;0.030985374;0.037995260;0.046560977;0.063875521;  
0.057299583;0.098842612;0.058907511;0.054509886;0.065540022;0.203296434;0.059541909;  
0.250639841;0.315291791;0.303754817;0.307269468;0.344759136;0.332817316;0.328239406;  
0.015153789;0.015886379;0.013623229;0.020285292;0.017470970;0.018435446;0.022721007;  
0.269354617;0.338808644;0.424201798;0.423874897;0.526216092;0.439507486;0.309097159;  
0.250295353;0.273304697;0.274897391;0.282131150;0.277304280;0.301180042;0.344256805;  
0.182261102;0.140786992;0.149426757;0.167939782;0.179931519;0.177680775;0.211914940;

0.567455321 0.636146100 0.644583706 0.549318117 0.518673954 0.675000262 0.596595728  
0.441400958 0.454121275 0.406034460 0.392430404 0.520564441 0.539819239 0.441427589  
0.289734123 0.287458359 0.300735306 0.304297607 0.300661873 0.337799478 0.346050032  
0.067843984 0.072726414 0.075628417 0.074888860 0.067225747 0.066604085 0.080009519  
0.225368770 0.259989442 0.121410949 0.230518150 0.237828127 0.193995580 0.251717774  
0.507993922 0.452662352 0.514132055 0.516065463 0.518117527 0.553211070 0.518270144  
0.044640233 0.045622748 0.035519948 0.049811562 0.060056795 0.049232785 0.058817203  
0.093775801 0.087062798 0.078971273 0.101554311 0.108613014 0.087120001 0.123219436  
0.027839817 0.026801397 0.029798650 0.027614841 0.025556392 0.036058904 0.032189960  
0.052731951 0.046223189 0.054507885 0.055831487 0.069917001 0.062042448 0.069372322  
0.881951791 0.866020486 0.890576628 0.901609874 0.888711496 0.862071284 0.900808817  
0.889307160 0.893217669 0.856191309 0.887740419 0.886427594 0.900792723 0.878338888  
0.035607804 0.035344444 0.034953195 0.033081739 0.041095993 0.042168263 0.061805500  
0.751813228 0.756279009 0.750578544 0.764207320 0.712689920 0.832557502 0.733783667  
0.028893274 0.029781695 0.024286411 0.032119636 0.034773490 0.032906590 0.042919550  
0.020772140 0.023181250 0.021482306 0.021701535 0.020346969 0.026331945 0.035180759  
0.061192773 0.061309784 0.079738839 0.079354397 0.068592992 0.082876420 0.164638888  
0.059363496 0.067123154 0.057226445 0.053548865 0.076197058 0.092175646 0.071338592  
0.312107739 0.291872632 0.278203557 0.245806507 0.337038517 0.395368316 0.246441620  
0.080939118 0.076408948 0.099016208 0.079432884 0.108662277 0.091562225 0.128735855  
0.928288561 0.929470157 0.938169948 0.935448802 0.939798708 0.942085857 0.938679924  
0.865106373 0.873745249 0.894519601 0.866723426 0.890539269 0.873717263 0.841607920  
0.547360959 0.510201366 0.585917324 0.633709425 0.572875596 0.558460815 0.565926787  
0.026203583 0.029126506 0.034057288 0.024928615 0.028773693 0.037068895 0.047298687  
0.573535279 0.644209738 0.642418315 0.596366624 0.606262014 0.630118874 0.665042058  
0.027473780 0.028761934 0.029996966 0.031186479 0.034341792 0.038934189 0.035843966  
0.113423124 0.096077780 0.123191738 0.106323229 0.109570694 0.180423088 0.153440402  
0.017507061 0.015679139 0.017328840 0.022535520 0.020900235 0.017371533 0.025295976  
0.032757206 0.039504035 0.030646896 0.034644262 0.038129573 0.044484932 0.050341110  
0.045340515 0.066778263 0.045131720 0.049288774 0.063995684 0.086574049 0.063847872  
0.864509590 0.845544747 0.869322239 0.846813400 0.848798490 0.896074330 0.799271686  
0.926141545 0.903226291 0.935750321 0.947810996 0.929787224 0.819037221 0.921408089  
0.047637130 0.050736418 0.054188183 0.044680508 0.048491958 0.069701549 0.069214324  
0.030442693 0.035040958 0.027995118 0.035687975 0.038448604 0.051565584 0.043725316  
0.030642623 0.036905388 0.036819637 0.037383582 0.039037785 0.044518920 0.052954521  
0.763314160 0.810884870 0.796985257 0.775458318 0.836613763 0.924824462 0.777135222  
0.885788178 0.907394838 0.915096813 0.922553506 0.927755148 0.927352235 0.908375816  
0.479968325 0.436361348 0.447715546 0.446615440 0.462248504 0.511270057 0.507533929  
0.423538287 0.401162935 0.381575900 0.466622315 0.426155042 0.373266968 0.439584243  
0.040151624 0.041972050 0.034658978 0.045629188 0.049540629 0.047361079 0.062350024  
0.214424656 0.232644185 0.207650211 0.246760601 0.263936595 0.204804136 0.277272091  
0.033367535 0.033930073 0.039538063 0.037526167 0.035266233 0.066786195 0.032518434  
0.474291637 0.553505215 0.560721600 0.533623885 0.545299050 0.615329905 0.552504565  
0.029654304 0.025314665 0.030714746 0.025778181 0.029767494 0.034296575 0.045865987

0.645014033!0.738083846!0.656502456!0.679806770!0.689589682!0.708678615!0.690084221!  
0.819878082!0.847450045!0.859231713!0.882858076!0.840799732!0.904171884!0.869547881!  
0.031517935!0.039991902!0.042358494!0.029964930!0.041921581!0.091988307!0.041531417!  
0.464422586!0.499021834!0.482397934!0.486085006!0.525842686!0.522126310!0.467717150!  
0.730949432!0.728970415!0.801039693!0.791189349!0.760571520!0.807154572!0.732126012!  
0.050959221!0.036110109!0.040203183!0.045082214!0.037730258!0.059927120!0.047455960!  
0.070655366!0.066592076!0.088076299!0.103439783!0.106162951!0.100319845!0.122492237!  
0.745233876!0.801866688!0.782962587!0.794971138!0.759781977!0.804563374!0.779110865!  
0.017257028!0.016190809!0.015018365!0.015692794!0.019667921!0.022014677!0.023438615!  
0.847253662!0.866417233!0.836306982!0.817538389!0.874414851!0.910663432!0.817127502!  
0.065654873!0.069193956!0.061996537!0.057933770!0.078470293!0.095627032!0.100642068!  
0.748811501!0.760472099!0.779501043!0.794258697!0.790282257!0.802037250!0.789406818!  
0.773380678!0.783239800!0.747421916!0.791244624!0.828018690!0.727185912!0.819228462!  
0.657864141!0.629638290!0.610264055!0.583564326!0.741208151!0.811481270!0.625723491!  
0.401533057!0.438553405!0.888633849!0.865680421!0.905869290!0.476742778!0.880985435!  
0.043948821!0.037269715!0.037599253!0.041243044!0.041873559!0.049512737!0.050504473!  
0.099854591!0.089743267!0.108340959!0.099628868!0.111462199!0.128417852!0.164633872!  
0.864494172!0.869499524!0.855694449!0.869742475!0.868155871!0.868192568!0.850372012!  
0.057516873!0.060073999!0.063280855!0.061400748!0.067954976!0.077273824!0.066763663!  
0.023300135!0.018374484!0.021576353!0.023191407!0.021092811!0.031796313!0.035081175!  
0.864488376!0.899440945!0.883263287!0.890231091!0.898730503!0.898805127!0.871138190!  
0.975514939!0.974706019!0.974587851!0.976914319!0.965958048!0.970079201!0.961402938!  
0.049113513!0.043159155!0.039208311!0.043230788!0.047784036!0.062698170!0.039532740!  
0.892197602!0.892906219!0.874353707!0.911228387!0.911691839!0.909344250!0.879732363!  
0.023111604!0.026761260!0.024425151!0.022722400!0.027286699!0.030661921!0.035167582!  
0.076201332!0.092753052!0.044940423!0.094885482!0.153627335!0.127891230!0.154239718!  
0.048665816!0.059557493!0.055168979!0.056480538!0.044446577!0.065043324!0.059368128!  
0.965250535!0.956774447!0.968283290!0.967209163!0.936891048!0.955899377!0.945541177!  
0.804321213!0.803247652!0.813564898!0.838959906!0.694326976!0.869662103!0.741736779!  
0.336901199!0.389162950!0.376559587!0.422655482!0.383695334!0.369042325!0.392695502!  
0.061014358!0.054987713!0.055506242!0.049095616!0.064335973!0.085009042!0.067893049!  
0.638521141!0.689240433!0.656789115!0.700220394!0.751075475!0.724708962!0.670776613!  
0.626661520!0.620397208!0.646269572!0.664085356!0.698502292!0.633723906!0.622860090!  
0.457344320!0.400386044!0.466534423!0.446291676!0.501288740!0.547619136!0.455144012!  
0.034227195!0.025204194!0.031247715!0.035263326!0.040664427!0.040219201!0.033241201!  
0.074521620!0.081436998!0.074484787!0.064653014!0.088913447!0.097133903!0.169493382!  
0.043953081!0.076696206!0.068712663!0.062752583!0.035848245!0.059980807!0.074963489!  
0.026894654!0.036044114!0.028686812!0.022718166!0.028172750!0.036819491!0.050275404!  
0.426237767!0.436583993!0.416341492!0.451184111!0.482145813!0.533556306!0.443635358!  
0.866581101!0.897682509!0.914206137!0.908441055!0.898805317!0.891318473!0.887043474!  
0.046574649!0.051091922!0.040049636!0.048556677!0.053365537!0.053344482!0.056272239!  
0.611205799!0.664035764!0.676076268!0.670281685!0.638291882!0.738493034!0.645856114!  
0.027354400!0.032426187!0.040734656!0.030003913!0.036650896!0.048737715!0.047440956!  
0.283087643!0.311884709!0.275920926!0.263646240!0.318785865!0.343737147!0.316352762!



0.131646044 0.184841069 0.108830498 0.137921197 0.209970228 0.151047800 0.194418599  
0.019987625 0.022304173 0.026910792 0.024075579 0.027532787 0.031420907 0.030784196  
0.845074304 0.874786940 0.902355760 0.896623911 0.884399089 0.888775551 0.893623019  
0.824813365 0.818738981 0.839366497 0.856273250 0.828449066 0.902594750 0.828463451  
0.091491872 0.167335107 0.144988260 0.135486786 0.146694220 0.257091268 0.151541721  
0.059198071 0.053761835 0.055928437 0.053719425 0.058585330 0.073716115 0.056862941  
0.038896110 0.037450486 0.033567071 0.025341766 0.034115856 0.043257907 0.041410436  
0.027659629 0.017229553 0.033371161 0.029528569 0.024469259 0.038768777 0.040800696  
0.839029278 0.869817146 0.864456995 0.852199127 0.846617112 0.882197424 0.861875317  
0.374609386 0.397534478 0.396868487 0.394702450 0.434149447 0.386889284 0.440650100  
0.041999656 0.034754418 0.035591757 0.036728307 0.037542785 0.087265513 0.036897943  
0.311680849 0.373332065 0.339095460 0.393819973 0.426611535 0.263136655 0.415466774  
0.052752951 0.054991133 0.048819716 0.073367562 0.082905502 0.071743461 0.075951855  
0.136766773 0.139551881 0.151982863 0.165425038 0.164736823 0.125699264 0.219873251  
0.561523594 0.583730071 0.577864777 0.609037609 0.591544408 0.601707303 0.623412946  
0.650267897 0.689579697 0.737059834 0.641322755 0.638142857 0.682157058 0.666131011  
0.191347551 0.360878439 0.295551724 0.350321988 0.313653323 0.318645113 0.436110428  
0.116196612 0.123161253 0.121048870 0.143432903 0.161161661 0.155502547 0.232985938  
0.053374201 0.061200815 0.084423196 0.080288497 0.145207222 0.084781997 0.128686097  
0.034152602 0.044517878 0.050996297 0.064166632 0.077413184 0.050270513 0.053745770  
0.015883670 0.017232258 0.020778967 0.023812698 0.019640254 0.026136149 0.025474885  
0.399057758 0.452768481 0.397753887 0.429298289 0.490951015 0.317475473 0.452843040  
0.053119954 0.056862969 0.045728020 0.060270903 0.082713325 0.083058456 0.061982560  
0.033255049 0.045997057 0.046641463 0.039503720 0.058092803 0.073519583 0.057146575  
0.025098325 0.033590319 0.035136839 0.022811849 0.026242750 0.047315023 0.040511476  
0.059804901 0.053706665 0.065363025 0.082193531 0.083112895 0.084204298 0.108401461  
0.366332313 0.322016880 0.352829245 0.346328330 0.364629458 0.384594727 0.377186057  
0.065909939 0.072560750 0.087809625 0.112543620 0.088085388 0.107990281 0.070954821  
0.045263342 0.056721023 0.045674021 0.062592309 0.058254951 0.056077890 0.049077995  
0.094769071 0.096404656 0.095303882 0.108613177 0.149838848 0.077443760 0.127366993  
0.028975960 0.030727889 0.028954452 0.027497303 0.028953951 0.052765921 0.034966016  
0.056466297 0.073288365 0.063030320 0.105490135 0.089293630 0.054573674 0.091328526  
0.365802695 0.359763359 0.368958893 0.353773306 0.316814434 0.411602170 0.448830655  
0.577413674 0.574278743 0.579271256 0.555244523 0.643017772 0.728020484 0.540838911  
0.407209905 0.411787263 0.445114685 0.463233821 0.417547790 0.468263573 0.472695418  
0.831257609 0.888726312 0.845503451 0.816084746 0.839307091 0.903587782 0.842926754  
0.055988100 0.052796541 0.064137377 0.050736313 0.052236568 0.064565144 0.105856850  
0.055209785 0.056574363 0.053989448 0.051510866 0.057658227 0.086377001 0.078757614  
0.021458065 0.022859877 0.016842660 0.022017731 0.025677818 0.034804098 0.024836544  
0.172697115 0.179149331 0.166286186 0.181590161 0.155597651 0.195658144 0.237940280  
0.882802893 0.907898636 0.895551691 0.900441512 0.900943843 0.908179388 0.891333991  
0.018639978 0.018421429 0.017565187 0.020505884 0.018166448 0.025780853 0.025866707  
0.015657066 0.017060071 0.023028492 0.022311721 0.019779125 0.028091981 0.031728233  
0.044701269 0.058631339 0.051946574 0.036540491 0.071626092 0.070191591 0.049268223

0.047942830|0.046520775|0.047010603|0.048330685|0.046981024|0.070159357|0.055350719|  
0.028947098|0.024717478|0.027679063|0.030211607|0.025987017|0.034693940|0.052085914|  
0.028366468|0.020857572|0.024393874|0.028888953|0.041618595|0.038996785|0.045035948|  
0.798774166|0.761885855|0.762353260|0.812841661|0.848078291|0.863148385|0.796067773|  
0.040659294|0.041926614|0.047118057|0.037741441|0.047095963|0.054323044|0.043563256|  
0.807439487|0.822959486|0.836528606|0.783460730|0.847930242|0.860446835|0.776274031|  
0.799762939|0.805290462|0.823924844|0.844518067|0.854065936|0.888186924|0.780397102|  
0.089430336|0.088448599|0.071901444|0.068610632|0.066421516|0.129866353|0.112907206|  
0.680773355|0.703049997|0.725340174|0.708764588|0.712077665|0.851851676|0.688880852|  
0.027217838|0.049186840|0.024160941|0.027989992|0.030419660|0.031831255|0.049377368|  
0.725881586|0.636321566|0.585257431|0.454820735|0.654622143|0.458424282|0.552283642|  
0.036620213|0.022027773|0.024074682|0.030633007|0.032826301|0.034762880|0.042120645|  
0.057642643|0.053834085|0.047852969|0.049657466|0.046612861|0.056208934|0.075966294|  
0.060198894|0.058058605|0.066268145|0.063109573|0.079002609|0.045315992|0.103344300|  
0.695741138|0.727179699|0.744586638|0.725601810|0.758360126|0.796108384|0.712917535|  
0.019386334|0.016688397|0.022073741|0.021294136|0.022060321|0.031298406|0.026122780|  
0.774688168|0.815709585|0.823484779|0.853614426|0.782357580|0.860142671|0.858858152|  
0.867709441|0.895987004|0.838900258|0.889794642|0.873570151|0.899297179|0.849587061|  
0.034266049|0.039855076|0.035565522|0.032756905|0.043477334|0.053749617|0.051596840|  
0.395505357|0.352431263|0.335640150|0.384404736|0.341327985|0.504398529|0.375053456|  
0.037981132|0.045066071|0.039553220|0.051144860|0.050347057|0.069974060|0.048953305|  
0.043079626|0.060163617|0.045287731|0.032044485|0.044503324|0.072556429|0.063899562|  
0.897698577|0.935399197|0.920413611|0.936559567|0.930577359|0.945931784|0.921698928|  
0.027629460|0.051073836|0.024610106|0.034579523|0.031214928|0.053269493|0.038531185|  
0.665718411|0.727431430|0.691928716|0.772499125|0.840778690|0.726551436|0.761035787|  
0.196092019|0.183026454|0.183081895|0.207306429|0.188626920|0.219746078|0.289332561|  
0.161088991|0.178897473|0.164050813|0.175426633|0.195066162|0.198222594|0.209722986|  
0.104586356|0.115196406|0.105185614|0.112347992|0.088330556|0.085145885|0.179804966|  
0.228403145|0.297582185|0.344135128|0.251953204|0.417605472|0.423287192|0.232678721|  
0.665090385|0.717918742|0.739543861|0.631905658|0.588429100|0.694618133|0.679383475|  
0.033305107|0.034429775|0.045598688|0.049616609|0.032047716|0.058906050|0.043006509|  
0.385109075|0.491775795|0.457212045|0.455409260|0.400705299|0.420107488|0.461285983|  
0.049153128|0.048349950|0.055477900|0.056366662|0.055468130|0.078814701|0.076322351|  
0.044926839|0.040726888|0.039645803|0.043665659|0.052608982|0.048218629|0.056604234|  
0.176916929|0.130071054|0.150170580|0.150234342|0.150681921|0.190414395|0.202669221|  
0.272953809|0.229813129|0.236746559|0.221385716|0.302360883|0.162425464|0.253744177|  
0.729823436|0.782707928|0.751704373|0.735947147|0.767381569|0.863085689|0.726339182|  
0.897351608|0.920328902|0.899954200|0.895821006|0.902523422|0.882193954|0.867903701|  
0.027589724|0.031667468|0.026222734|0.026492441|0.027713936|0.041004704|0.043365042|  
0.440276100|0.514320077|0.447488424|0.469977571|0.532856252|0.648774980|0.459729529|  
0.082930010|0.079199208|0.073677198|0.074152107|0.080977084|0.094840812|0.132212211|  
0.779282051|0.796905800|0.810093510|0.838193890|0.807865597|0.821123451|0.825087482|  
0.194717345|0.170239263|0.212348764|0.266074568|0.313406567|0.163973942|0.237353461|  
0.673803940|0.710917638|0.700223454|0.597610237|0.709672765|0.786137825|0.677864585|

0.267490538 0.285673662 0.286969329 0.280030172 0.277297900 0.293188696 0.281017196  
0.885631384 0.886131901 0.886794150 0.885098086 0.918577422 0.905867527 0.875859623  
0.803231257 0.833227677 0.795537002 0.843950895 0.829135362 0.863492350 0.792580795  
0.850661866 0.851796838 0.855459534 0.833981116 0.825860430 0.854391612 0.847051416  
0.032038559 0.030153194 0.031167795 0.028049094 0.042073626 0.038424591 0.050115374  
0.145704514 0.191185856 0.233515762 0.174114775 0.211659435 0.208590264 0.152976779  
0.071697725 0.077866211 0.075683919 0.086234272 0.084041604 0.088571084 0.105301289  
0.038986820 0.031278178 0.050690198 0.028554292 0.059716991 0.038263008 0.050761043  
0.881321393 0.899787954 0.903036110 0.914738237 0.917040694 0.910168132 0.894508641  
0.288465817 0.346415110 0.325366543 0.469569080 0.317875040 0.319413590 0.364630645  
0.054247774 0.055104674 0.055833400 0.056906974 0.055719635 0.076186808 0.064083187  
0.210856158 0.142779670 0.169769224 0.145409233 0.230426771 0.211307547 0.205806592  
0.025024750 0.023316804 0.022051065 0.025019619 0.023970328 0.033037605 0.040440190  
0.719548284 0.670810822 0.670988557 0.689232419 0.669917608 0.746888046 0.683299053  
0.147124502 0.134836918 0.139475384 0.189795308 0.210482546 0.115095340 0.191500627  
0.673139566 0.645210719 0.608520857 0.726724727 0.658022133 0.815278433 0.677921927  
0.032611924 0.023264713 0.031466788 0.035773628 0.029082288 0.050595142 0.058203544  
0.192611039 0.178715750 0.161708455 0.170307773 0.171767019 0.265694574 0.192765341  
0.069451919 0.096433568 0.080581401 0.059895981 0.072355201 0.074020042 0.142856997  
0.027192518 0.023482723 0.021681312 0.026822053 0.038778419 0.075588533 0.030291188  
0.969440343 0.969814101 0.972496410 0.969797136 0.971026472 0.954089289 0.957993693  
0.164631125 0.151954042 0.148985742 0.150164565 0.173861271 0.184074789 0.199921557  
0.532757761 0.509787871 0.584982896 0.555822859 0.539593852 0.577857666 0.567997354  
0.765726375 0.794150410 0.742717005 0.790591481 0.785328293 0.888605622 0.762671001  
0.161977866 0.147041206 0.149061364 0.206859615 0.281500293 0.096300131 0.193080145  
0.227647121 0.260986327 0.254041162 0.235721747 0.317039326 0.209327637 0.315541200  
0.064353984 0.056138511 0.065316996 0.056541129 0.060001257 0.083808445 0.072207774  
0.021772078 0.020486869 0.023066511 0.032299910 0.026815115 0.081528023 0.038546869  
0.086319854 0.125765700 0.083731223 0.069612930 0.221336865 0.208441916 0.076852859  
0.874918060 0.907570199 0.886197548 0.900010405 0.900726267 0.907421532 0.867116567  
0.049240139 0.064962173 0.053105858 0.055650527 0.055806619 0.077323275 0.056918962  
0.054348092 0.056877007 0.069887212 0.053635203 0.054165992 0.057805274 0.068554450  
0.647753926 0.738191842 0.745402714 0.787607435 0.746758646 0.756787102 0.757079967  
0.072060338 0.075511371 0.070576191 0.069410855 0.079198615 0.099325214 0.103322587  
0.522062621 0.563194921 0.508358728 0.526852124 0.505031522 0.653607079 0.486134936  
0.444161945 0.401427362 0.594075033 0.476001046 0.537946020 0.520017365 0.584109613  
0.894486710 0.893972264 0.897429984 0.899579430 0.854129466 0.805928869 0.866788346  
0.148155870 0.130157680 0.145470166 0.139377773 0.181271857 0.181020481 0.159148405  
0.617494140 0.636439225 0.687064639 0.634209385 0.653903567 0.673806401 0.652431059  
0.179104112 0.148595011 0.194573228 0.151813685 0.149560021 0.191290525 0.188222443  
0.356065343 0.378252861 0.378815953 0.354519313 0.428069712 0.444851580 0.410499740  
0.641986561 0.620787224 0.635619613 0.614833119 0.630563565 0.577669394 0.592592263  
0.774926026 0.787560804 0.807918423 0.792280402 0.769864215 0.829138346 0.796390639  
0.277796566 0.244236286 0.289220128 0.290008251 0.281524915 0.283037790 0.348691490

0.019206641 0.019118670 0.019433598 0.021418172 0.023278746 0.021583023 0.029513644  
0.073198114 0.070560859 0.075886215 0.095227586 0.162484355 0.062747968 0.052525857  
0.114227845 0.129628943 0.097841449 0.083821316 0.119766897 0.296690307 0.128175377  
0.556915825 0.679573534 0.614053566 0.653425995 0.649366232 0.662350159 0.605053720  
0.414968984 0.491562669 0.435368496 0.481372925 0.543812269 0.442353482 0.477339762  
0.216444209 0.194499754 0.183155629 0.249237849 0.215127595 0.217671828 0.257959853  
0.849034927 0.827040909 0.839476752 0.873575693 0.869903456 0.665918029 0.825618724  
0.400458389 0.368793455 0.336956914 0.325566184 0.405351396 0.528491196 0.350894108  
0.048583487 0.048037948 0.054335050 0.034508012 0.050831251 0.090440279 0.061035257  
0.768090442 0.787217321 0.806632866 0.810495108 0.821335395 0.854936055 0.754593018  
0.784963616 0.783578383 0.802966568 0.827321078 0.805077673 0.844439503 0.829625875  
0.227072654 0.195798079 0.206808972 0.207712248 0.217902320 0.222443226 0.292690021  
0.595965330 0.762750123 0.672110864 0.621483920 0.760307913 0.692522170 0.631193857  
0.816493865 0.724603091 0.870077213 0.910090114 0.782621832 0.879388163 0.790536374  
0.030304824 0.031933376 0.030887702 0.035090438 0.026704391 0.048351228 0.046629049  
0.554886580 0.597849861 0.623291941 0.540322128 0.517160352 0.569329772 0.588363252  
0.042769417 0.042994593 0.034949929 0.032172496 0.059809832 0.046994675 0.060479707  
0.064444685 0.065092460 0.063500635 0.068969346 0.065310280 0.073477326 0.074639394  
0.026311771 0.024655798 0.027671439 0.023848567 0.029091135 0.029066422 0.028462478  
0.629018167 0.698319545 0.692373969 0.582425224 0.633581113 0.705553159 0.645583720  
0.951500288 0.944723103 0.952776525 0.961818459 0.960001879 0.904575426 0.935956219  
0.098372248 0.074204723 0.079430671 0.064388017 0.096221839 0.134475096 0.117796881  
0.587204767 0.558110451 0.612507910 0.716505936 0.568628093 0.623900428 0.668225236  
0.176773212 0.178676352 0.166905339 0.217070176 0.195085248 0.141351588 0.198457112  
0.492906327 0.471800459 0.502057951 0.461473409 0.465242516 0.572685483 0.511268622  
0.025868836 0.027749752 0.024330930 0.022551420 0.027829758 0.034433276 0.035207559  
0.777049339 0.817126325 0.798323547 0.833116130 0.915968236 0.902657454 0.797869700  
0.030036317 0.031645466 0.024044142 0.034348541 0.039668394 0.048344424 0.037439635  
0.547196040 0.617895510 0.601307222 0.595236311 0.584779684 0.677652547 0.641442953  
0.060674090 0.042016920 0.039284299 0.040546195 0.083098429 0.040187177 0.073514433  
0.273768312 0.263732571 0.317058651 0.335871165 0.339654971 0.273138838 0.380658103  
0.443895208 0.265994808 0.366146957 0.359822481 0.268842787 0.256607721 0.298560259  
0.046710866 0.051224548 0.037916592 0.043353615 0.042523947 0.097372119 0.063694050  
0.029728969 0.030538897 0.027938034 0.025503377 0.026149074 0.048835041 0.036050759  
0.267758019 0.277899676 0.270772044 0.270283410 0.348347789 0.343474162 0.320022141  
0.019381429 0.017082664 0.018198173 0.017763340 0.019272695 0.022935740 0.032109809  
0.678487385 0.724814574 0.714848838 0.762329650 0.743792153 0.767796778 0.727504141  
0.028242105 0.028285982 0.027738591 0.026846831 0.023990100 0.036038872 0.043392946  
0.678226710 0.633559070 0.652395471 0.772438360 0.784202785 0.774468715 0.715850877  
0.203818110 0.134610375 0.176721348 0.196324042 0.260038259 0.133847572 0.194223586  
0.029153199 0.031620432 0.028367236 0.027788501 0.032505874 0.038040216 0.034530438  
0.021850152 0.022599096 0.024721978 0.023009764 0.026609772 0.027456785 0.031820545  
0.073559015 0.076194841 0.080622985 0.080259958 0.077790062 0.095782886 0.098173891  
0.775888001 0.736235918 0.784604293 0.741788394 0.777729240 0.799925892 0.749618392

0.457068513|0.466889169|0.476442122|0.404102612|0.442049492|0.419329512|0.474180152|  
0.864848815|0.890673737|0.840813623|0.882840347|0.885305360|0.898287198|0.872555582|  
0.499088208|0.468685391|0.505628748|0.469560627|0.517762318|0.602567302|0.512589628|  
0.485612789|0.495079077|0.486577911|0.494423887|0.499211801|0.528272348|0.509157385|  
0.071279751|0.037157876|0.045563055|0.043108989|0.054733763|0.046666608|0.056763489|  
0.508163301|0.544920956|0.551459916|0.501725108|0.482052586|0.586164197|0.667873665|  
0.542137129|0.520457335|0.607889591|0.509444988|0.586409549|0.728160335|0.544389690|  
0.743347628|0.784335532|0.763489023|0.734622685|0.854812276|0.903974169|0.736088732|  
0.329009496|0.379878816|0.381093101|0.395886576|0.429299759|0.461996536|0.415792653|  
0.026461933|0.030017440|0.026835505|0.025831454|0.038444127|0.034018118|0.036960272|  
0.070688864|0.065778631|0.075493955|0.119832170|0.065293230|0.084460088|0.139656539|  
0.055632523|0.042149376|0.056927367|0.044758113|0.059579125|0.036923450|0.090951992|  
0.770903237|0.748713316|0.785066669|0.774857100|0.740903248|0.679346661|0.685829278|  
0.160243468|0.140611283|0.145481211|0.174267829|0.192475378|0.165855160|0.194563424|  
0.711863693|0.748410957|0.775426886|0.770032492|0.757636297|0.739527541|0.762617894|  
0.143841488|0.151162745|0.136698421|0.183203785|0.242129246|0.118560566|0.173419553|  
0.016817228|0.022462789|0.022266932|0.018935666|0.019642627|0.021491020|0.028743258|  
0.304720151|0.330086343|0.308811534|0.339804623|0.363616904|0.333589191|0.371667185|  
0.363844765|0.345143198|0.326100008|0.342066695|0.365372420|0.399430604|0.289264950|  
0.588872050|0.631128241|0.777723809|0.714033213|0.852854935|0.789040931|0.743102336|  
0.880328514|0.811597156|0.888923054|0.860010639|0.853689198|0.693975826|0.822856009|  
0.038633970|0.031805282|0.031051200|0.039801069|0.034539483|0.057010711|0.050601729|  
0.030949009|0.046904734|0.040525850|0.038390967|0.036991389|0.040008684|0.048388441|  
0.064459697|0.069703752|0.069914782|0.056893008|0.057975765|0.073633142|0.106160727|  
0.619254705|0.752631267|0.703531699|0.748336393|0.670940888|0.564219069|0.708473214|  
0.449263668|0.497539260|0.440985556|0.469866071|0.494898884|0.382061026|0.441744480|  
0.149527930|0.178218526|0.118076716|0.128451392|0.197168930|0.195871354|0.157475142|  
0.136090702|0.095243690|0.104811003|0.081810167|0.104608833|0.117765570|0.150477735|  
0.035306226|0.035233046|0.043029482|0.038303426|0.046968349|0.062469450|0.045440974|  
0.176676201|0.195412737|0.211700023|0.181852982|0.193840322|0.200513297|0.231454123|  
0.071043604|0.087945069|0.084262385|0.070254541|0.081055849|0.101650097|0.102501521|  
0.457207954|0.490799015|0.476840932|0.525326512|0.514532679|0.491758016|0.486519410|  
0.033443675|0.035765580|0.032994502|0.037263720|0.034321097|0.042666218|0.037294655|  
0.488781442|0.362352074|0.474389852|0.492959215|0.512441506|0.480033218|0.579271914|  
0.886939558|0.901217491|0.916635111|0.922457994|0.922674604|0.920424912|0.900900555|  
0.890186195|0.908458125|0.897503214|0.890226093|0.921813773|0.925151626|0.888687021|  
0.362596329|0.373457171|0.394519404|0.417102670|0.356401905|0.396661671|0.448099706|  
0.022264778|0.016839006|0.016573600|0.015031268|0.020922321|0.019018097|0.043867777|  
0.866736338|0.878042568|0.892087423|0.880866515|0.873738850|0.875145450|0.838128141|  
0.031385292|0.040333974|0.036675749|0.042745347|0.042897771|0.040199966|0.048091736|  
0.814836378|0.819613914|0.869063744|0.824796841|0.793286780|0.874569598|0.831880664|  
0.657496549|0.640868384|0.638853009|0.654749272|0.616673712|0.767039698|0.636125478|  
0.061499444|0.077342518|0.051649801|0.052329586|0.081978820|0.123340419|0.081415188|  
0.038938883|0.038953953|0.032421771|0.033031247|0.037803735|0.059716518|0.036392788|

0.043592167|0.050657571|0.043141038|0.042217446|0.038207081|0.057186942|0.053288473|  
0.517748181|0.682558677|0.581090019|0.536700752|0.693062066|0.559687348|0.608184818|  
0.964103399|0.967616891|0.965701387|0.968552322|0.871760699|0.961226010|0.953139473|  
0.025039439|0.032868263|0.027842687|0.023236165|0.024093352|0.021860633|0.039218866|  
0.037448304|0.030446851|0.030183892|0.028344618|0.037401769|0.047392214|0.063367542|  
0.883993442|0.797236505|0.876866345|0.890477295|0.834096824|0.616264338|0.836315869|  
0.037052941|0.035161935|0.052627080|0.051477671|0.062976812|0.043664013|0.056461171|  
0.617577978|0.570839588|0.673568898|0.635964320|0.643314279|0.826375982|0.654394414|  
0.029661890|0.041095526|0.050945048|0.048136885|0.046646949|0.074105929|0.040480281|  
0.033484824|0.026347335|0.036468499|0.032378410|0.046634009|0.036042268|0.039175309|  
0.360700004|0.380531356|0.378670304|0.386759474|0.394379954|0.455787662|0.408836177|  
0.047713538|0.049076612|0.050003241|0.038873164|0.048869323|0.045786361|0.071436496|  
0.412046082|0.417138274|0.414888651|0.437790714|0.432007604|0.411602944|0.442165622|  
0.112057812|0.136418258|0.118465044|0.105598285|0.141398329|0.209090364|0.100935355|  
0.130915293|0.125558529|0.117122816|0.129337850|0.129988140|0.162249046|0.153242874|  
0.311725592|0.372251722|0.376652499|0.365866656|0.401690947|0.413643045|0.403330333|  
0.642841000|0.758060625|0.657772569|0.710056069|0.624101535|0.488878911|0.535251701|  
0.791825196|0.837063403|0.840868480|0.852027880|0.833359313|0.908080342|0.837820362|  
0.253407889|0.303135656|0.254914704|0.279848200|0.325885868|0.207658184|0.332017731|  
0.738874642|0.766136401|0.812022703|0.817138354|0.751263904|0.786272476|0.823893677|  
0.051321874|0.045436656|0.052321274|0.047029463|0.059903192|0.075452001|0.039448436|  
0.025100424|0.023659879|0.022684756|0.024452024|0.031930839|0.031189793|0.035076025|  
0.059358833|0.079663319|0.057553416|0.047019284|0.121124532|0.125043635|0.078260887|  
0.043083399|0.049313262|0.038713238|0.041353015|0.041701937|0.054882512|0.053777259|  
0.036513476|0.052634880|0.034940483|0.034055478|0.037007376|0.091784131|0.041167230|  
0.192099400|0.277921035|0.256801350|0.269033401|0.322184548|0.238034420|0.317132041|  
0.064727237|0.080502334|0.073538123|0.063682953|0.081265371|0.111781774|0.088996105|  
0.026012288|0.033341822|0.032812956|0.021633155|0.046965381|0.042122872|0.035716792|  
0.096647953|0.169636559|0.174903386|0.153524941|0.168022074|0.126110274|0.249078980|  
0.689490682|0.715520765|0.615624556|0.598546302|0.606464121|0.640732683|0.663023820|  
0.042322542|0.038086927|0.036769964|0.037251976|0.035335327|0.035616961|0.049598351|  
0.912974077|0.929380736|0.914988115|0.915118933|0.920440597|0.937921310|0.921142388|  
0.082680642|0.091900732|0.079254551|0.063119302|0.087994590|0.181225240|0.092864690|  
0.040527557|0.035476336|0.042394179|0.043986761|0.031692116|0.031685461|0.052245504|  
0.596925010|0.604934648|0.653772352|0.609486641|0.631051652|0.608729715|0.640743722|  
0.195431426|0.203418216|0.201911450|0.205024318|0.193923731|0.156871446|0.280626186|  
0.070164335|0.085166514|0.065774087|0.064924409|0.073251367|0.136604299|0.067108499|  
0.376692363|0.335100977|0.318571423|0.315960197|0.465170812|0.332520578|0.358182858|  
0.258112707|0.447557200|0.304870298|0.262372107|0.285783156|0.516251541|0.291458841|  
0.726822567|0.744447312|0.742406891|0.756101880|0.744264824|0.771697248|0.702690983|  
0.034457438|0.053404286|0.042786227|0.031172339|0.042713707|0.087063018|0.055769825|  
0.050653374|0.048548640|0.047126458|0.049621740|0.041678283|0.071816638|0.069123784|  
0.387124757|0.369313875|0.433891436|0.402822188|0.377291957|0.414172823|0.446885745|  
0.801009816|0.731500906|0.799693693|0.794899848|0.804003399|0.860484382|0.789039632|

0.032487393|0.022727784|0.042244475|0.032378301|0.034074138|0.039646287|0.041789299|  
0.024764965|0.025991958|0.026345921|0.040083370|0.032633850|0.042781561|0.031762608|  
0.028900775|0.023216415|0.024571256|0.025993311|0.028420367|0.038414745|0.046696830|  
0.034901360|0.031184377|0.028145944|0.037416395|0.032986526|0.041339721|0.035449490|  
0.060167900|0.031381887|0.045387375|0.030062977|0.033294075|0.056840878|0.047289099|  
0.050827573|0.037246030|0.051054681|0.045981445|0.053590861|0.079827697|0.061454010|  
0.041300625|0.053927177|0.040996800|0.037004507|0.046194085|0.107460158|0.049368702|  
0.035538954|0.028908066|0.035585189|0.030129798|0.039886170|0.103755621|0.031906407|  
0.017143501|0.015837085|0.018101626|0.012897563|0.018095184|0.032302237|0.020227264|  
0.323876884|0.407570772|0.466873313|0.480527667|0.462261458|0.235531738|0.470701962|  
0.046669894|0.057995437|0.054377893|0.068452928|0.074698401|0.067325049|0.087591388|  
0.061537933|0.054007622|0.062060712|0.068367255|0.069446123|0.088968371|0.111100235|  
0.034557534|0.047204789|0.036428171|0.037374871|0.042134609|0.058938342|0.045066623|  
0.508687271|0.567732502|0.612650783|0.610865046|0.602090379|0.511618412|0.562155576|  
0.935793934|0.943546581|0.956282926|0.940207539|0.885236759|0.939109438|0.904317170|  
0.653448042|0.736804098|0.707438763|0.801387528|0.728169428|0.716410530|0.779709562|  
0.678612729|0.691740411|0.700699715|0.691068265|0.669310635|0.693718412|0.686609101|  
0.707172137|0.655934205|0.704091148|0.712564847|0.748203477|0.686003543|0.634061761|  
0.867012209|0.904162562|0.861182801|0.925000176|0.899807737|0.914033365|0.868429395|  
0.812188324|0.778386733|0.844718082|0.868828883|0.869526721|0.687515752|0.686233262|  
0.016062635|0.012789483|0.018245832|0.013865804|0.016299364|0.021977138|0.022147037|  
0.958341905|0.950996735|0.952665210|0.947035371|0.925953804|0.921313462|0.929277074|  
0.890685921|0.918161176|0.914443925|0.897089627|0.935784411|0.935715684|0.907983571|  
0.046420775|0.041786959|0.047918974|0.040624959|0.062826057|0.072289028|0.049537733|  
0.045077258|0.022843621|0.030706162|0.028892694|0.048727812|0.030994596|0.036391440|  
0.456406610|0.420315046|0.451237116|0.438848339|0.502533747|0.595715792|0.489434415|  
0.025151196|0.031398826|0.021157891|0.030910433|0.036494963|0.029862142|0.048425167|  
0.068828451|0.068023187|0.071121862|0.060695743|0.070633047|0.087788609|0.112308642|  
0.065656424|0.064183890|0.054585026|0.072347975|0.062350822|0.071783355|0.102119772|  
0.027678713|0.026637700|0.029701649|0.029732591|0.027200321|0.036038723|0.028614835|  
0.043321428|0.051256715|0.053819891|0.047341331|0.051728895|0.049778821|0.078917184|  
0.023821762|0.027416921|0.024098608|0.023945927|0.027240028|0.035071417|0.029654710|  
0.617880518|0.665701282|0.650229878|0.639618306|0.621471481|0.640290976|0.658476744|  
0.832175597|0.859556018|0.842675647|0.801583378|0.847845866|0.854716886|0.850607276|  
0.064956592|0.073549599|0.076228380|0.051024032|0.071825456|0.163526765|0.060809986|  
0.882118112|0.876909390|0.924828677|0.903914689|0.872924098|0.790491917|0.809907309|  
0.153799157|0.173659527|0.155246015|0.151688367|0.189438838|0.116673298|0.191703022|  
0.777911609|0.715172563|0.758909498|0.731130066|0.741436833|0.531493104|0.754022271|  
0.036545260|0.032294069|0.028486615|0.034300359|0.031141837|0.039440586|0.066736048|  
0.034738230|0.034909380|0.047869766|0.030810036|0.047982477|0.049156555|0.103508055|  
0.306757092|0.353945662|0.355475346|0.350530481|0.331915339|0.347738595|0.375407564|  
0.658962908|0.522770750|0.658486114|0.574876862|0.601371676|0.504127815|0.518142926|  
0.712730467|0.774667177|0.701450687|0.765179338|0.788856177|0.823049876|0.696982170|  
0.020672994|0.027788620|0.025415164|0.028770637|0.024764254|0.047865494|0.039482547|

0.043244436!0.070570675!0.046422768!0.048928991!0.051664117!0.101324035!0.054073804!  
0.417856558!0.455760797!0.444870817!0.427566791!0.436540632!0.452245281!0.395900693!  
0.043135348!0.030694096!0.024534462!0.032702194!0.035346422!0.033462984!0.037093416!  
0.022383849!0.020280235!0.019344405!0.019299242!0.026315261!0.025157487!0.024985078!  
0.513212727!0.527146302!0.493165572!0.484908205!0.520220424!0.532396866!0.502286856!  
0.614946863!0.653742548!0.707357646!0.658966428!0.649600626!0.677840435!0.631767894!  
0.033908796!0.031379757!0.028479360!0.029180035!0.030848147!0.038478225!0.044865236!  
0.635208660!0.733995306!0.697336110!0.732556444!0.721523073!0.712041907!0.657247947!  
0.390815121!0.427751031!0.465882616!0.521562709!0.442683900!0.400965708!0.464027630!  
0.608909059!0.629251854!0.611565837!0.586781069!0.602358479!0.649051759!0.616131088!  
0.069846055!0.061607523!0.062377112!0.057734271!0.067534422!0.073232461!0.083028619!  
0.571243632!0.564719753!0.561112327!0.636160056!0.575393468!0.497939845!0.631382083!  
0.677756564!0.637222606!0.675426466!0.720889584!0.747276018!0.785870774!0.668898527!  
0.701238754!0.761066905!0.720897884!0.674537329!0.747202416!0.809269200!0.700672330!  
0.130368373!0.114399101!0.116284013!0.107181413!0.124377696!0.137334738!0.170017424!  
0.143562625!0.142439807!0.158342910!0.172874391!0.142086611!0.062379648!0.150153922!  
0.040941290!0.045783192!0.046615508!0.042130406!0.037608706!0.037108533!0.062968802!  
0.229884165!0.246378618!0.272019390!0.252994448!0.265620146!0.273838353!0.324333403!  
0.302138209!0.323408137!0.273886502!0.347049624!0.302367827!0.300940059!0.384361152!  
0.895438493!0.926349456!0.906800385!0.910514977!0.913713952!0.917438643!0.890721532!  
0.165938022!0.130599546!0.147946436!0.141277939!0.161490011!0.193300119!0.188405992!  
0.038517238!0.055046137!0.054592654!0.040215168!0.047016491!0.072216897!0.074803304!  
0.102701294!0.104917392!0.101393752!0.103964210!0.096983829!0.085858684!0.141145140!  
0.023231129!0.019561018!0.026277879!0.027798690!0.025690792!0.033518954!0.027637219!  
0.594433582!0.476808476!0.595983439!0.566881721!0.535964285!0.774127489!0.576172511!  
0.740600168!0.766640734!0.807460332!0.712262649!0.735780006!0.800869015!0.754668083!  
0.842131851!0.842803818!0.837952314!0.868006733!0.833439762!0.841278221!0.842446085!  
0.036341487!0.037181688!0.033225339!0.029119518!0.042350056!0.044328373!0.045207044!  
0.041941806!0.045151019!0.036054339!0.061764228!0.082173889!0.038058512!0.043032028!  
0.037594150!0.034210333!0.044338787!0.038071901!0.029898320!0.046151621!0.034707172!  
0.498871194!0.469241103!0.471608331!0.471416205!0.528816157!0.616250451!0.487667044!  
0.038264862!0.044981434!0.043416519!0.044050692!0.051511332!0.144929000!0.039748957!  
0.033951096!0.033093226!0.034127087!0.035601910!0.045448448!0.043469899!0.049743666!  
0.059723124!0.089941090!0.070575008!0.069912911!0.070320406!0.129704117!0.049835522!  
0.053749285!0.051515061!0.056183815!0.039298224!0.041628897!0.068957676!0.046722356!  
0.067201615!0.074550358!0.072227662!0.082892673!0.084664539!0.076304221!0.106582522!  
0.037272656!0.026374006!0.023583864!0.033062815!0.027931728!0.036967846!0.031760748!  
0.058514983!0.069242955!0.083344786!0.078384485!0.079204552!0.090427087!0.125658477!  
0.595292897!0.590553852!0.634475993!0.629892914!0.609233878!0.665111296!0.637397377!  
0.244421186!0.271443999!0.260266619!0.215707570!0.290809948!0.241377574!0.232937585!  
0.058145561!0.078975935!0.058642527!0.064645704!0.096601061!0.058788665!0.074960973!  
0.038952351!0.042685496!0.041119235!0.038240681!0.040466803!0.067499394!0.041568490!  
0.590171294!0.601098735!0.596133006!0.623989237!0.598072148!0.593023618!0.615525866!  
0.038873062!0.036031917!0.031211703!0.033770782!0.062591016!0.051264021!0.043935849!



0.027347437!0.020630801!0.023884855!0.031325829!0.029812528!0.018075929!0.063505777!  
0.570401610!0.552979564!0.647738338!0.588852602!0.580370999!0.668376514!0.594949186!  
0.845020712!0.890430313!0.887203514!0.909398934!0.886112082!0.905302346!0.868228350!  
0.023349971!0.022656742!0.030181811!0.022274119!0.024030131!0.052390809!0.036005382!  
0.342526764!0.322992282!0.355832694!0.373238840!0.311376167!0.325983858!0.353352315!  
0.341961580!0.350119112!0.336926543!0.314982570!0.399213415!0.429234965!0.367463203!  
0.182557512!0.159157749!0.163684160!0.176776411!0.191611574!0.136895841!0.202437314!  
0.027417441!0.033326733!0.039921243!0.030725142!0.023468627!0.050490107!0.042315105!  
0.056428711!0.075044938!0.057765980!0.056374754!0.051248687!0.072053997!0.087756622!  
0.489011560!0.520646910!0.503645857!0.440955734!0.487390684!0.466521257!0.524133008!  
0.264061742!0.388843121!0.317728345!0.265693733!0.435832190!0.367456947!0.278616420!  
0.179101315!0.206236004!0.176910131!0.232201840!0.322633382!0.118299137!0.259336538!  
0.838895138!0.884258359!0.888582946!0.879766478!0.914439420!0.912567230!0.883123270!  
0.031762934!0.020123971!0.025276718!0.036673326!0.034236043!0.033718588!0.029035021!  
0.384609073!0.376430510!0.403589530!0.425030636!0.425740937!0.381606198!0.442435903!  
0.854933587!0.800386398!0.881386811!0.297463793!0.297595875!0.332951570!0.877987789!  
0.041764811!0.043675165!0.050994171!0.045956559!0.037282581!0.064107484!0.084574610!  
0.034828916!0.023585416!0.033583195!0.030340570!0.031399340!0.051584775!0.049362436!  
0.322509594!0.341156741!0.314437153!0.336905497!0.383343503!0.248246031!0.372066935!  
0.047752449!0.041494091!0.047617882!0.052689519!0.042300878!0.055379505!0.049344913!  
0.023585621!0.036256884!0.026877863!0.033641498!0.026689656!0.040202863!0.053403167!  
0.017070968!0.016726906!0.014016684!0.017816851!0.018361370!0.022906877!0.027996728!  
0.604856720!0.546158082!0.596949737!0.561684790!0.637292177!0.553467891!0.625054666!  
0.054046396!0.048617429!0.048087083!0.038589816!0.046982001!0.072505659!0.065524109!  
0.644904618!0.563885466!0.676787744!0.802537811!0.704572106!0.763994679!0.669171471!  
0.048822380!0.087675210!0.075495634!0.167042127!0.129104938!0.080482060!0.224842916!  
0.037667241!0.052462523!0.032169355!0.052106484!0.035403517!0.045767844!0.052974187!  
0.465303456!0.387963562!0.476139758!0.475847880!0.522407298!0.432570274!0.483493431!

| DA5         | DA6         | DA7         | DA8         | DA9         | DA10        | mean.CONT   |
|-------------|-------------|-------------|-------------|-------------|-------------|-------------|
| 0.139743185 | 0.142828257 | 0.151139428 | 0.138602387 | 0.123219249 | 0.139130076 | 0.107468765 |
| 0.042544300 | 0.043949607 | 0.034922162 | 0.057060386 | 0.073453261 | 0.043305074 | 0.031504051 |
| 0.041332591 | 0.043288578 | 0.049978425 | 0.050367011 | 0.058927241 | 0.055918651 | 0.034441660 |
| 0.037522355 | 0.046955349 | 0.043925904 | 0.057853974 | 0.068118692 | 0.040971335 | 0.033618734 |
| 0.153230326 | 0.201792081 | 0.139611788 | 0.140038189 | 0.165942995 | 0.170307756 | 0.108832253 |
| 0.029358089 | 0.044343168 | 0.024201196 | 0.033687543 | 0.037484775 | 0.029049423 | 0.022706988 |
| 0.031736411 | 0.029413173 | 0.025665129 | 0.028843403 | 0.033536236 | 0.032770968 | 0.023438820 |
| 0.064889221 | 0.052067385 | 0.051047165 | 0.056134833 | 0.056423928 | 0.063468601 | 0.045212359 |
| 0.750981133 | 0.846202686 | 0.843772556 | 0.853716547 | 0.894105031 | 0.880481248 | 0.770797240 |
| 0.028056172 | 0.030076260 | 0.024069106 | 0.028437759 | 0.033329163 | 0.029079862 | 0.021801935 |
| 0.035813452 | 0.029674806 | 0.028572159 | 0.042322288 | 0.026463061 | 0.039100798 | 0.023556869 |
| 0.021571639 | 0.022325745 | 0.024709981 | 0.029978470 | 0.031035333 | 0.024030509 | 0.018844179 |
| 0.041637263 | 0.040635059 | 0.045958869 | 0.038642273 | 0.060002314 | 0.059762139 | 0.032661068 |
| 0.855480675 | 0.867969460 | 0.842113922 | 0.878089043 | 0.891291274 | 0.870957893 | 0.814731153 |
| 0.040513781 | 0.065100815 | 0.073397447 | 0.047584566 | 0.055702010 | 0.064756641 | 0.038969448 |
| 0.019992892 | 0.023126254 | 0.030059221 | 0.024394838 | 0.027792305 | 0.024825661 | 0.019584321 |
| 0.245577647 | 0.289354657 | 0.240710869 | 0.293910983 | 0.311231742 | 0.249607515 | 0.199680493 |
| 0.026271408 | 0.043483223 | 0.027347383 | 0.029205863 | 0.041490305 | 0.030447151 | 0.022679010 |
| 0.149069374 | 0.174904653 | 0.114932390 | 0.135339692 | 0.170883665 | 0.175216427 | 0.118277475 |
| 0.104577866 | 0.197144018 | 0.204228388 | 0.228168630 | 0.205287739 | 0.191864682 | 0.109211238 |
| 0.038569830 | 0.051242048 | 0.058537717 | 0.062330925 | 0.050152144 | 0.056460784 | 0.037416291 |
| 0.559803375 | 0.633016690 | 0.676982825 | 0.655452732 | 0.649836418 | 0.790885264 | 0.559677178 |
| 0.822821009 | 0.854857972 | 0.820095839 | 0.866099962 | 0.842893412 | 0.825889454 | 0.781962985 |
| 0.040260993 | 0.051146355 | 0.033712933 | 0.043735970 | 0.046364062 | 0.052386223 | 0.032888362 |
| 0.039604442 | 0.057996589 | 0.046698822 | 0.046826345 | 0.063651220 | 0.048592188 | 0.034419358 |
| 0.046647977 | 0.049859431 | 0.054754054 | 0.051867998 | 0.042749393 | 0.057919668 | 0.031907170 |
| 0.040871678 | 0.043845906 | 0.042564111 | 0.049197263 | 0.048180631 | 0.041927567 | 0.034044981 |
| 0.607484229 | 0.629728957 | 0.597172897 | 0.628650688 | 0.608406591 | 0.604125567 | 0.549841247 |
| 0.609958881 | 0.624137165 | 0.653688842 | 0.637945174 | 0.682636753 | 0.726955172 | 0.537226754 |
| 0.032901839 | 0.038039748 | 0.029945914 | 0.035175418 | 0.052921326 | 0.034958356 | 0.027661522 |
| 0.030700681 | 0.028169815 | 0.030745969 | 0.034202292 | 0.039892061 | 0.038493871 | 0.026211470 |
| 0.846946796 | 0.816550071 | 0.866454751 | 0.840840784 | 0.858095527 | 0.851492503 | 0.901253501 |
| 0.043523447 | 0.055209809 | 0.056047632 | 0.060630344 | 0.061040133 | 0.059045744 | 0.036666169 |
| 0.509265724 | 0.500901563 | 0.535159320 | 0.508468717 | 0.572439415 | 0.521852449 | 0.445000442 |
| 0.029903940 | 0.042979389 | 0.028049925 | 0.029119614 | 0.029361050 | 0.031232465 | 0.023004325 |
| 0.260283700 | 0.249532251 | 0.240396908 | 0.283717969 | 0.273987415 | 0.276084665 | 0.208099185 |
| 0.043322067 | 0.039690825 | 0.039186053 | 0.052233074 | 0.045638690 | 0.047174170 | 0.032474929 |
| 0.403396368 | 0.482105272 | 0.400079431 | 0.481337221 | 0.541284309 | 0.461340396 | 0.360233722 |
| 0.021138323 | 0.023820412 | 0.021894738 | 0.019533152 | 0.027224607 | 0.026216909 | 0.017771668 |
| 0.046705724 | 0.046163346 | 0.038995327 | 0.042045427 | 0.054762688 | 0.040787098 | 0.034052734 |
| 0.724467912 | 0.819925075 | 0.712367949 | 0.783349544 | 0.796777746 | 0.763451157 | 0.678775674 |
| 0.448843256 | 0.502600761 | 0.463417342 | 0.478879530 | 0.554577224 | 0.526376614 | 0.420298524 |
| 0.085007058 | 0.130431386 | 0.129281856 | 0.121422455 | 0.143300277 | 0.101186212 | 0.070544953 |

0.054940925|0.038880840|0.055804899|0.090208330|0.046917252|0.081105467|0.094823786|  
0.018613472|0.022554924|0.022370773|0.018664549|0.024495120|0.019237799|0.016967779|  
0.055738805|0.070722682|0.065732918|0.060490776|0.075551589|0.069939333|0.050173060|  
0.280459597|0.281347252|0.259872917|0.292167095|0.300694653|0.286334890|0.241137514|  
0.054734967|0.061939613|0.058903578|0.068516039|0.068484746|0.065813494|0.048037815|  
0.250362896|0.282678988|0.383995797|0.293131466|0.235780436|0.191998933|0.184189104|  
0.084750443|0.105835686|0.096954838|0.137527237|0.113295642|0.133280190|0.083484237|  
0.056507763|0.055634937|0.047010479|0.082116026|0.056348044|0.079460916|0.046811859|  
0.078690785|0.092578809|0.074498566|0.096309655|0.087373316|0.088344226|0.065209630|  
0.122364876|0.123190690|0.108923186|0.154090599|0.219500172|0.158589085|0.098851987|  
0.057135908|0.073876795|0.054565166|0.066027604|0.067059174|0.051479402|0.040488337|  
0.040898645|0.034262934|0.033921400|0.040106901|0.032865988|0.032198226|0.026401434|  
0.041580329|0.098876106|0.063857706|0.075600772|0.089198482|0.065062989|0.043915145|  
0.032350257|0.030820839|0.043062510|0.038226349|0.037107818|0.038419405|0.027440460|  
0.339262512|0.434299859|0.386722340|0.393577912|0.485594689|0.393623191|0.339191190|  
0.026756758|0.035735868|0.026764654|0.029809588|0.033850721|0.035457913|0.024045390|  
0.070886409|0.071281054|0.067395017|0.066053212|0.078283703|0.066851392|0.054775025|  
0.029534419|0.059399433|0.038173109|0.039866352|0.062314118|0.037802791|0.029000311|  
0.035749430|0.041904539|0.035463911|0.046377260|0.050442298|0.042482636|0.033847177|  
0.048961145|0.041749253|0.063591303|0.055293059|0.051136536|0.073105514|0.039816841|  
0.070128204|0.051888654|0.031351975|0.047098886|0.044342148|0.054092521|0.030539331|  
0.018095643|0.019087041|0.018075022|0.022459546|0.022103340|0.017487400|0.015879812|  
0.032698634|0.048796738|0.036665545|0.055339958|0.046071964|0.035571199|0.032492364|  
0.049013294|0.066210726|0.041939672|0.059583144|0.058722973|0.054657941|0.037866894|  
0.031675014|0.049141650|0.036316089|0.040072367|0.047672823|0.041522225|0.030818870|  
0.033763903|0.044985665|0.035397733|0.048232054|0.051405185|0.053355773|0.029040042|  
0.048421568|0.076085717|0.043343938|0.049318665|0.060987543|0.046592921|0.035590165|  
0.038162126|0.031151323|0.041063783|0.042029683|0.049424429|0.041230517|0.031998804|  
0.040924323|0.042125949|0.048431199|0.049939522|0.047969399|0.045713828|0.036610341|  
0.459199117|0.655835965|0.627399901|0.573628563|0.497734831|0.594973109|0.476111094|  
0.337200977|0.380044503|0.292227331|0.340222903|0.397314671|0.336112365|0.269356414|  
0.779277232|0.844945079|0.776289706|0.797125513|0.825678278|0.794043943|0.747968518|  
0.058743642|0.043326772|0.033599421|0.048070783|0.045303180|0.045561592|0.033991803|  
0.641740866|0.760093447|0.645170811|0.674800200|0.741894301|0.674848833|0.583102101|  
0.202172935|0.204966844|0.180805706|0.259416228|0.256974232|0.216513636|0.175303699|  
0.017175144|0.021529418|0.019273799|0.024569600|0.025340662|0.018749547|0.015618652|  
0.198333394|0.285936597|0.190577477|0.266888764|0.335231852|0.297171362|0.179722313|  
0.042981684|0.062366989|0.072953257|0.076407535|0.075538447|0.066374404|0.051380163|  
0.058626052|0.045224417|0.052012000|0.061524299|0.057394293|0.034959248|0.033929970|  
0.285978286|0.302575474|0.306075806|0.282766109|0.414830497|0.385608084|0.261497666|  
0.338693723|0.500174786|0.447948456|0.463053884|0.485763410|0.478776442|0.369947527|  
0.046129122|0.045601885|0.052939536|0.053986536|0.049805918|0.054084811|0.041664299|  
0.132937352|0.152140364|0.114059798|0.145296794|0.154669188|0.137605143|0.114410764|  
0.021170222|0.022716717|0.021702107|0.025857971|0.028265425|0.020851132|0.017944900|

0.060294891 0.062449460 0.046733083 0.053220803 0.089894904 0.054720048 0.036969959  
0.041982125 0.034428536 0.034014542 0.037055380 0.031633452 0.040036600 0.025341174  
0.017499454 0.020045568 0.019598953 0.017221274 0.026314032 0.020014713 0.016269643  
0.475760148 0.529055178 0.463779891 0.541334951 0.571409787 0.498135974 0.447220721  
0.062329929 0.063751742 0.045688443 0.049351463 0.083412739 0.068224228 0.045213084  
0.025107509 0.029224466 0.026797189 0.023053710 0.028493611 0.034822329 0.022174934  
0.038825239 0.054349471 0.031618513 0.051743258 0.061128727 0.052736120 0.029430513  
0.081126061 0.068438414 0.078897693 0.100605571 0.073228888 0.092281657 0.068298373  
0.872458866 0.829864494 0.831376062 0.867941419 0.864707728 0.865426491 0.806779850  
0.077314464 0.079332652 0.066614680 0.095862731 0.093013411 0.084881593 0.065549910  
0.192300425 0.201537740 0.162859241 0.183002928 0.194628683 0.184706885 0.152845034  
0.058688866 0.044845569 0.031310531 0.043795465 0.055413464 0.050645364 0.035615566  
0.025890115 0.034589395 0.025558962 0.028959976 0.036874274 0.029982118 0.023075339  
0.036470021 0.039902085 0.038766646 0.040547027 0.037812395 0.035368004 0.027635353  
0.105327563 0.096058308 0.095513438 0.113231905 0.096311538 0.119476556 0.082762172  
0.035457072 0.028364527 0.028225792 0.028518037 0.029679631 0.036576136 0.023700191  
0.458437203 0.460407094 0.377766015 0.549698853 0.585226415 0.566010502 0.391349315  
0.020129621 0.019381509 0.017306000 0.019389456 0.016036788 0.020980203 0.015276061  
0.030484538 0.038767515 0.028377452 0.041354373 0.053108234 0.035997879 0.027029115  
0.063645547 0.063447623 0.054458471 0.067224447 0.088000877 0.068865972 0.052483260  
0.066857483 0.075882432 0.059599469 0.065301972 0.086708049 0.055260424 0.045703739  
0.040323931 0.065139584 0.035973456 0.030238622 0.035427938 0.024803069 0.023029457  
0.037257486 0.034600676 0.025577961 0.037811415 0.028485185 0.035236893 0.025933916  
0.044282837 0.050247818 0.047360534 0.047944469 0.055450043 0.053734369 0.040411362  
0.023741627 0.037470601 0.025505244 0.030976745 0.050909533 0.028794662 0.021931068  
0.125942860 0.160177331 0.100182940 0.132005935 0.143430452 0.154014289 0.091576097  
0.086735111 0.082636988 0.057822870 0.083074561 0.069383464 0.069631727 0.053498265  
0.482683010 0.421639970 0.484877320 0.565553184 0.594208660 0.531574160 0.441521624  
0.092095404 0.109371690 0.106313487 0.122190508 0.118694178 0.135726686 0.091165610  
0.029801703 0.025333436 0.031937586 0.039683778 0.038992849 0.033946812 0.025124920  
0.078094604 0.077918462 0.071293717 0.114192297 0.098281478 0.071521112 0.052819469  
0.017001499 0.021998348 0.019148939 0.026213369 0.029513893 0.032336084 0.018664142  
0.412597001 0.439084608 0.438787267 0.465041416 0.491425282 0.466682707 0.394910725  
0.024578156 0.022878643 0.029698641 0.026708351 0.027055729 0.027190786 0.022037853  
0.226889464 0.209747692 0.207260357 0.219658652 0.258709372 0.249366536 0.189035761  
0.026404120 0.034527689 0.031060093 0.031513166 0.034318554 0.031169471 0.027205600  
0.062505653 0.076302026 0.069472532 0.076551595 0.072195873 0.067907593 0.055616714  
0.030877875 0.024704612 0.040922600 0.033803417 0.039296599 0.041064926 0.027231238  
0.097577860 0.199050653 0.146264795 0.189633430 0.215570944 0.153236193 0.101812948  
0.068334208 0.078946381 0.067127634 0.070509506 0.086473605 0.073282795 0.057326009  
0.024539967 0.025799945 0.024209822 0.022372053 0.022858084 0.019862412 0.019262359  
0.053729054 0.053335161 0.063751829 0.054009930 0.057483145 0.055752823 0.043265554  
0.042880005 0.049987238 0.044940619 0.051926844 0.046804571 0.045106363 0.035812191  
0.630477449 0.693546437 0.648216374 0.661264762 0.698758849 0.684020549 0.608000265

0.096356844 0.107454236 0.117861154 0.114259577 0.133789336 0.120370249 0.094173406  
0.053609862 0.064841252 0.082774004 0.059183619 0.074302395 0.051752151 0.046352480  
0.027284574 0.034345567 0.024487841 0.030962337 0.036146233 0.033568132 0.023003971  
0.029258349 0.056323354 0.038233877 0.060342896 0.056674698 0.038838375 0.030156407  
0.042214087 0.092737746 0.051502569 0.057110358 0.073305794 0.057631633 0.043264850  
0.057467119 0.071533308 0.061833965 0.066789066 0.079327668 0.064025379 0.050035339  
0.039299634 0.045406850 0.031393912 0.043315975 0.053496763 0.051688206 0.030272144  
0.066638249 0.105133733 0.083256853 0.084905409 0.106737224 0.072312132 0.057142529  
0.036285052 0.031234839 0.034774315 0.040188295 0.037266300 0.045097857 0.028577298  
0.043286088 0.049582572 0.051456604 0.059784880 0.057361925 0.070714579 0.043009610  
0.056517627 0.035099924 0.038926924 0.047883444 0.057702305 0.059373405 0.035596260  
0.038842158 0.063584506 0.053893073 0.054116306 0.071861519 0.061477349 0.035991800  
0.036666362 0.053038490 0.042265976 0.039228738 0.075327886 0.055099630 0.033324892  
0.028224193 0.037964802 0.033827986 0.034631033 0.039560945 0.033375422 0.028177204  
0.049339174 0.044432110 0.033058126 0.048223196 0.054389950 0.083692376 0.036891102  
0.024867868 0.029600552 0.021708646 0.024521170 0.030446207 0.021086709 0.019933495  
0.038154621 0.034248976 0.032522636 0.035312370 0.041297962 0.034845852 0.028100633  
0.050651626 0.061752687 0.049784359 0.065806824 0.050956941 0.054960129 0.042887854  
0.043472535 0.039851512 0.066166064 0.048316899 0.056347905 0.035380301 0.033569490  
0.029260826 0.025918291 0.026914303 0.028325017 0.049470007 0.029866270 0.022869596  
0.088960313 0.133195464 0.130135972 0.106150239 0.150984046 0.158308441 0.096665593  
0.637813430 0.648077547 0.675221788 0.709244002 0.687178959 0.621683661 0.582786899  
0.097072598 0.088116629 0.066632674 0.074357061 0.075176835 0.090611556 0.056572253  
0.219172345 0.276064335 0.212021035 0.266220144 0.290506614 0.237172732 0.195740529  
0.058923915 0.108352528 0.087906118 0.102956476 0.132019239 0.075031709 0.063994600  
0.038238792 0.029197702 0.033857919 0.031128171 0.036178120 0.035507001 0.026734909  
0.032703893 0.049639672 0.035569575 0.036259390 0.046549462 0.038365437 0.031222976  
0.239151557 0.287510206 0.250308997 0.221557503 0.244803749 0.255373216 0.207884988  
0.039137782 0.049423575 0.047806157 0.046539721 0.057643083 0.049275101 0.038490381  
0.066866638 0.060182813 0.042919535 0.038368190 0.054144238 0.045216251 0.037207459  
0.762084536 0.787752237 0.742673196 0.760636764 0.761880725 0.768101167 0.707002782  
0.040591428 0.040965069 0.028268544 0.040039535 0.037919612 0.035308246 0.028580056  
0.747608972 0.758402641 0.699094280 0.723407033 0.796733736 0.728542673 0.667399971  
0.037377609 0.047822855 0.051875768 0.064154719 0.046265326 0.042770874 0.035616160  
0.055253318 0.083681627 0.059138203 0.067913137 0.073910564 0.079136490 0.049839422  
0.042811992 0.061679242 0.051180690 0.052617324 0.048316737 0.061274049 0.039828837  
0.183815284 0.167603564 0.127568316 0.150870318 0.161949101 0.202462737 0.130816528  
0.775027930 0.815499327 0.880019248 0.859886892 0.853863418 0.852669056 0.787962794  
0.021606468 0.025267789 0.023140946 0.025936130 0.031813235 0.031319432 0.020868052  
0.019807169 0.038424629 0.028200519 0.031132905 0.030644675 0.027342971 0.021585462  
0.615204029 0.688160450 0.706525628 0.706317185 0.722453432 0.661493249 0.594443296  
0.055616799 0.062581571 0.049806464 0.052361879 0.050054054 0.049423758 0.041833374  
0.344052365 0.363141458 0.356196596 0.430073324 0.468465174 0.396995975 0.339404230  
0.033018485 0.049153074 0.039506460 0.040020148 0.061253113 0.038418639 0.032820468

0.030187891|0.053731961|0.038220373|0.047983969|0.057099389|0.043335489|0.031933440|  
0.385782531|0.494299695|0.435254518|0.520833725|0.529866520|0.522861534|0.399902917|  
0.071278054|0.038966664|0.035878909|0.050263797|0.058206852|0.058278710|0.038358965|  
0.075086286|0.128818928|0.110972460|0.108103723|0.128901675|0.128487601|0.079969662|  
0.026756242|0.024273845|0.024772721|0.023625825|0.027188904|0.030278214|0.020268320|  
0.047005438|0.074226193|0.065992720|0.077757180|0.087768924|0.061519081|0.047753371|  
0.037716860|0.028626077|0.040122063|0.040077803|0.048890879|0.040183235|0.028360401|  
0.025589541|0.040709580|0.028760520|0.034037556|0.038440341|0.036545918|0.024082185|  
0.032954514|0.054269046|0.043193970|0.035312061|0.059674895|0.041447177|0.030910510|  
0.032295958|0.029116748|0.022637720|0.033027496|0.041598337|0.023994803|0.022852226|  
0.043090578|0.032772053|0.046564514|0.049471954|0.049170305|0.067710831|0.035361108|  
0.875084819|0.888721509|0.893289623|0.902122264|0.904440386|0.901679732|0.863399485|  
0.026327844|0.08277557|0.045987829|0.044253457|0.078583284|0.047988873|0.033546799|  
0.048093464|0.048143688|0.033354155|0.038215621|0.041042910|0.048798942|0.035945956|  
0.029472078|0.025609062|0.031247955|0.035703399|0.037334929|0.032254285|0.025743346|  
0.207973956|0.261382184|0.215359295|0.240336562|0.274556613|0.255845790|0.201746200|  
0.044197393|0.052180017|0.043905444|0.048564947|0.031499006|0.060489224|0.035367507|  
0.067700830|0.067333020|0.053416003|0.063132632|0.072807625|0.084604111|0.050143484|  
0.035053079|0.037302306|0.031855892|0.038145806|0.038887924|0.039432152|0.027703162|  
0.045327165|0.042153096|0.044926434|0.036015100|0.053599876|0.048425603|0.034281172|  
0.076857029|0.071750181|0.083989772|0.076021180|0.081175090|0.113152061|0.064540934|  
0.068252708|0.065420561|0.065524871|0.071140167|0.072425468|0.088822305|0.057380027|  
0.383510593|0.466181940|0.348693708|0.408904587|0.429174470|0.428580199|0.339054774|  
0.073177911|0.076081212|0.073083577|0.083542198|0.077152213|0.086512950|0.063557285|  
0.238036580|0.178161259|0.230530629|0.229792780|0.263518463|0.249171181|0.182081825|  
0.026230040|0.038457106|0.030000682|0.030735736|0.043126982|0.039473288|0.026317582|  
0.037741052|0.022413197|0.031557746|0.040038868|0.028863331|0.036564268|0.026362050|  
0.105639295|0.128413742|0.101713412|0.102891121|0.111330708|0.145210024|0.085176412|  
0.054502571|0.036467904|0.039827599|0.045257684|0.039530171|0.031885723|0.028130350|  
0.033419871|0.041617797|0.037558518|0.030427623|0.031677304|0.037049330|0.029164548|  
0.021841834|0.013299352|0.015213212|0.019708991|0.018395928|0.020492870|0.014713876|  
0.040999683|0.037607609|0.033971892|0.045645017|0.035013629|0.040910835|0.032769712|  
0.034870068|0.037956244|0.034019249|0.059244709|0.044691462|0.038544503|0.029264882|  
0.031902925|0.024355939|0.024143750|0.038618213|0.025387752|0.030587065|0.022561602|  
0.424144398|0.525119206|0.519222254|0.521080305|0.600198368|0.550008898|0.451187472|  
0.032921068|0.041089627|0.038951478|0.036167233|0.053115556|0.037787913|0.030683852|  
0.032808713|0.050128920|0.029763045|0.040523431|0.038026330|0.033821565|0.027953829|  
0.023705208|0.042722102|0.032078734|0.040680265|0.039328369|0.026887965|0.025710004|  
0.436899722|0.551545056|0.389374778|0.387488414|0.531584530|0.396579038|0.333657394|  
0.031852540|0.037029614|0.032400940|0.027478851|0.038568799|0.094050444|0.024264480|  
0.025196872|0.026602777|0.019945674|0.031866246|0.032979304|0.023320366|0.021687535|  
0.135331451|0.180561347|0.140713573|0.189356816|0.222120293|0.207900971|0.125548064|  
0.038724609|0.054727309|0.038209742|0.041503488|0.046987025|0.061175648|0.036881070|  
0.049811294|0.116074190|0.070749351|0.082057346|0.100853153|0.066582201|0.054031172|

0.026920096|0.029862464|0.020413897|0.021923276|0.020285596|0.021740425|0.018912893|  
0.022090157|0.021501998|0.032462932|0.032303137|0.033784297|0.024166483|0.019662919|  
0.164847223|0.171026955|0.118755620|0.136439971|0.136842770|0.155070471|0.112938934|  
0.030834559|0.037153362|0.038813961|0.035732579|0.040227635|0.041533754|0.030817443|  
0.291904290|0.381018012|0.361744856|0.318735154|0.354909909|0.318521776|0.280237268|  
0.123784908|0.107698315|0.114604574|0.126589816|0.126058229|0.134736041|0.094449052|  
0.068354699|0.068875855|0.075220930|0.063954883|0.078258850|0.078414140|0.059671070|  
0.130352973|0.193728474|0.118049224|0.152640406|0.198011800|0.185794585|0.106154183|  
0.269075519|0.325915791|0.253081186|0.285725714|0.364607944|0.282293569|0.247287473|  
0.084229608|0.104535196|0.052923579|0.105108031|0.108140061|0.105975020|0.060127796|  
0.249724711|0.270100849|0.175105830|0.192663005|0.308074416|0.188183548|0.167920582|  
0.027933715|0.049374627|0.075237423|0.055980894|0.086059912|0.036447556|0.027712761|  
0.299677111|0.264740641|0.279168956|0.261174025|0.301581322|0.305639652|0.247380082|  
0.029928444|0.036308279|0.034079890|0.039517098|0.041602700|0.034762162|0.029274879|  
0.076513916|0.066117485|0.066513920|0.071657172|0.072762945|0.064399003|0.056366056|  
0.625670061|0.642021849|0.613835379|0.738447095|0.677373233|0.691553446|0.601977822|  
0.020313244|0.020079940|0.017580337|0.028245657|0.023577642|0.023462786|0.018234678|  
0.034517882|0.051748023|0.040491883|0.037039657|0.051989234|0.052775410|0.033825063|  
0.019013871|0.021990307|0.017457640|0.019886793|0.022540231|0.020956436|0.017320894|  
0.860695472|0.818712489|0.781078965|0.801202874|0.896168091|0.781565124|0.722187979|  
0.072515338|0.073269716|0.066859472|0.067909386|0.097648440|0.079622570|0.065717822|  
0.037740115|0.055985002|0.032798163|0.045087466|0.047309783|0.038942609|0.035011246|  
0.055756986|0.050600610|0.047300923|0.065655610|0.042194807|0.059050685|0.039376874|  
0.064613498|0.064166826|0.057014167|0.072480988|0.067935386|0.069375316|0.056215857|  
0.360340174|0.509026049|0.351824487|0.431388769|0.418083628|0.386092438|0.334179734|  
0.044519537|0.041932902|0.049632392|0.050383772|0.050275355|0.056064414|0.039904962|  
0.047012199|0.053262362|0.048435418|0.056551645|0.046226712|0.043254122|0.040670867|  
0.749323029|0.816439851|0.794936812|0.804110967|0.812852835|0.804624936|0.662525651|  
0.839569699|0.841769381|0.909486727|0.877429765|0.887675914|0.885734555|0.818004862|  
0.026264611|0.036688032|0.030433744|0.031542069|0.035196892|0.030581550|0.026659272|  
0.055508777|0.042455085|0.049096363|0.040158636|0.046343632|0.029292696|0.071474095|  
0.148869307|0.147477530|0.132337466|0.190627442|0.200839242|0.247577370|0.128552829|  
0.407564609|0.429914935|0.399001320|0.464964987|0.471141049|0.474866595|0.386799876|  
0.059209519|0.066571962|0.050477742|0.067663252|0.079070226|0.072245246|0.047543612|  
0.764330438|0.800334255|0.830765667|0.822015823|0.810220578|0.826180795|0.710579785|  
0.036705467|0.065308752|0.038482538|0.043501071|0.054297897|0.033374226|0.029518355|  
0.075976505|0.068837178|0.069522272|0.081972090|0.065260031|0.066352543|0.059277959|  
0.078000037|0.079244773|0.075868748|0.068786185|0.075875139|0.067154161|0.060239950|  
0.716989575|0.725499717|0.698568923|0.712892586|0.768021326|0.773598321|0.640657314|  
0.066426076|0.144277627|0.074805064|0.081403444|0.073336113|0.155930321|0.064545022|  
0.054575212|0.055980962|0.039226228|0.045488930|0.073783845|0.058959946|0.039682016|  
0.063978166|0.065250143|0.045321856|0.071484792|0.087629806|0.068177625|0.052634340|  
0.029844071|0.031777269|0.029243003|0.027041760|0.037177999|0.028909961|0.024430602|  
0.760706897|0.727852735|0.674628894|0.728409419|0.750751973|0.784772045|0.695712404|

0.130899781|0.092190163|0.123679384|0.116218559|0.205397498|0.099087456|0.190159105|  
0.091166912|0.104186712|0.061623007|0.070438936|0.085995795|0.154842081|0.060477650|  
0.177043895|0.175742038|0.121882188|0.144866747|0.173024440|0.157846472|0.126957335|  
0.065673469|0.060823217|0.043092084|0.054508573|0.059736480|0.046676036|0.045487151|  
0.410873178|0.501830705|0.384857785|0.580857279|0.340273220|0.361771366|0.342674924|  
0.565300996|0.666441711|0.640828127|0.615679075|0.697897971|0.657320123|0.578597573|  
0.057099568|0.089442154|0.068398711|0.074410856|0.112629165|0.078071061|0.052279058|  
0.753224464|0.876879458|0.839004978|0.827272172|0.854615308|0.784111505|0.764698443|  
0.035118253|0.066129671|0.043038557|0.041791612|0.063293994|0.051600763|0.036470867|  
0.138223883|0.146244430|0.152642359|0.161920580|0.157802448|0.162668083|0.126101930|  
0.035920985|0.048731941|0.042466492|0.048428612|0.049296087|0.045922581|0.030780716|  
0.565034505|0.616069990|0.666153357|0.645159487|0.756179856|0.726133992|0.543669841|  
0.040909028|0.056348107|0.051952188|0.044474179|0.070066738|0.051765505|0.036921989|  
0.032713651|0.020807775|0.027514376|0.037315651|0.043265627|0.036805294|0.024894427|  
0.023654781|0.019798111|0.016740295|0.023578958|0.026895706|0.022734089|0.017729783|  
0.764498188|0.865180409|0.792052761|0.860663923|0.837459508|0.818524647|0.742834737|  
0.012651809|0.016334522|0.013865654|0.014020821|0.015584993|0.014979671|0.011975771|  
0.338100575|0.354748906|0.280991538|0.324525878|0.353483081|0.348562177|0.279169320|  
0.762835980|0.775031124|0.755583564|0.773772811|0.790598361|0.802392162|0.730370889|  
0.045132269|0.068832781|0.050878352|0.046420866|0.062697331|0.068355021|0.038999808|  
0.221960527|0.269293251|0.274794875|0.368356059|0.352205986|0.290245971|0.214316346|  
0.048417909|0.039027691|0.045834911|0.066654684|0.053258309|0.037750214|0.031384124|  
0.022800391|0.019539822|0.017152317|0.019112894|0.019417545|0.026611995|0.015752910|  
0.084085199|0.078879859|0.071300519|0.084402862|0.095992324|0.097766026|0.062203592|  
0.050754459|0.066738338|0.043516750|0.073012472|0.063329137|0.061806870|0.047264740|  
0.090882992|0.128506700|0.185628735|0.078490046|0.148167072|0.162549450|0.073042812|  
0.810846360|0.820848166|0.370596606|0.841226019|0.471913862|0.452905404|0.817922361|  
0.027654537|0.026473421|0.019507223|0.019682273|0.029210287|0.030775086|0.018955484|  
0.300251141|0.175779146|0.154428310|0.199226083|0.190733226|0.250940519|0.305291208|  
0.066865040|0.083222737|0.065058504|0.068836073|0.126802867|0.077718656|0.056273360|  
0.081290146|0.079962078|0.084817904|0.097213760|0.102669203|0.105424986|0.078034398|  
0.048788569|0.056692400|0.061563091|0.069219296|0.111162065|0.092532561|0.051385701|  
0.032590595|0.032833820|0.036336566|0.034974398|0.047999510|0.030563678|0.027307244|  
0.047120052|0.064399523|0.045968319|0.056074149|0.062677410|0.062950720|0.045123885|  
0.050944709|0.051065182|0.057699815|0.050648599|0.055073411|0.066940705|0.045165787|  
0.831681903|0.785762836|0.730659517|0.771342963|0.783836472|0.831958893|0.708173274|  
0.038342542|0.044380801|0.038098062|0.056941713|0.059435362|0.047974199|0.036125792|  
0.182397939|0.222926854|0.179837179|0.192349839|0.218188220|0.256634100|0.150123245|  
0.038598896|0.094179728|0.071143055|0.063707984|0.074899903|0.076761852|0.047726276|  
0.047246211|0.048379686|0.056786919|0.064375543|0.066604200|0.072683090|0.047214841|  
0.019444039|0.029945030|0.058916133|0.030392256|0.030758547|0.042630165|0.022563846|  
0.330923020|0.388563742|0.335113885|0.399893518|0.386930729|0.375892474|0.317282144|  
0.029242400|0.040843807|0.037329064|0.035046858|0.034067059|0.036428723|0.027556437|  
0.041930226|0.039495113|0.025777268|0.030759647|0.063796500|0.049943831|0.023605566|



0.023696146|0.033849693|0.031150663|0.034556219|0.042935311|0.030209594|0.023990276|  
0.141478151|0.118714404|0.129401769|0.138236665|0.170344181|0.119392130|0.116731303|  
0.500336854|0.609547785|0.564116384|0.598580728|0.627314990|0.586419355|0.500848420|  
0.020026332|0.020771706|0.019319499|0.015437702|0.022091910|0.025327059|0.016252834|  
0.476868913|0.533086164|0.459540218|0.561119618|0.610569281|0.533082796|0.450401671|  
0.032141294|0.044388894|0.034621357|0.049100857|0.045255095|0.035770923|0.031721807|  
0.053369972|0.062868814|0.070840571|0.068597353|0.112529730|0.065903658|0.056997137|  
0.042016421|0.088422680|0.046855656|0.052792562|0.104003470|0.059445203|0.040675408|  
0.405276021|0.532896771|0.418560841|0.457975043|0.464933364|0.465615947|0.391630698|  
0.043405565|0.058143939|0.055938786|0.054172143|0.054349664|0.059852206|0.042970561|  
0.060833894|0.069462047|0.062892951|0.067744990|0.078456483|0.057150474|0.055898817|  
0.024489088|0.023582602|0.030567953|0.043340078|0.030412411|0.041167775|0.024537753|  
0.311237293|0.386228436|0.310476980|0.391023417|0.430489181|0.369775211|0.297883359|  
0.025896324|0.056877010|0.027579459|0.031705360|0.046200063|0.029915239|0.025391340|  
0.096212299|0.114716776|0.075957744|0.073174259|0.126918361|0.108595003|0.064547050|  
0.365940435|0.334633267|0.325622042|0.341320298|0.407834084|0.386388789|0.314942344|  
0.035350489|0.022395508|0.021201924|0.023684376|0.022395269|0.023695669|0.019744829|  
0.194076836|0.149700850|0.180314500|0.190984829|0.136887485|0.159788896|0.125989502|  
0.023341916|0.018924732|0.035567483|0.025708804|0.021093533|0.025882161|0.018398503|  
0.036950612|0.043747383|0.039922344|0.053029121|0.044689050|0.043314973|0.035842204|  
0.061379463|0.053660943|0.056250303|0.062133818|0.058328781|0.066952886|0.050990703|  
0.059500315|0.112511090|0.075768096|0.097092082|0.124228760|0.095452089|0.067257333|  
0.034896521|0.058869539|0.035525701|0.039865862|0.059121886|0.056436590|0.032278761|  
0.420012245|0.524900843|0.420405312|0.615049729|0.619630766|0.555052142|0.399620278|  
0.055217379|0.056799938|0.046458959|0.061622863|0.069936052|0.054569257|0.047433940|  
0.775319889|0.820891613|0.811913752|0.850213667|0.847606237|0.809589504|0.757087536|  
0.062189336|0.110459045|0.063232383|0.119931427|0.083959941|0.072405364|0.052733421|  
0.042643956|0.091019361|0.052790695|0.048389363|0.089317772|0.057072975|0.038336983|  
0.397772844|0.429086943|0.440254190|0.395119768|0.420780323|0.364650638|0.349718216|  
0.125373013|0.289644736|0.124081507|0.218230916|0.205584199|0.149957232|0.125645851|  
0.046253702|0.045943789|0.052685783|0.056268265|0.064310241|0.054812930|0.044492838|  
0.025857102|0.026730329|0.022636427|0.053287442|0.040023857|0.032897520|0.023919265|  
0.051692361|0.056325649|0.046658535|0.047058527|0.055588629|0.056163438|0.045532810|  
0.047487899|0.032995889|0.033114765|0.033214586|0.049904429|0.038586763|0.031700905|  
0.064927386|0.046688305|0.046638416|0.055416310|0.058408250|0.056375401|0.045574743|  
0.069284379|0.073899249|0.062833098|0.067823309|0.063415963|0.057078081|0.054380882|  
0.039839916|0.040835977|0.047650995|0.046613729|0.039922985|0.036218646|0.036621346|  
0.032269521|0.040998442|0.023297841|0.030204894|0.031132162|0.033857334|0.024604199|  
0.148452840|0.222545528|0.209258848|0.198375474|0.202768682|0.170457390|0.155202839|  
0.035869317|0.044977132|0.024285726|0.049198878|0.049225400|0.043490422|0.029315360|  
0.122685992|0.154772378|0.140594429|0.157671450|0.156213456|0.147720641|0.117819194|  
0.036909638|0.035073987|0.030200356|0.043885383|0.030001962|0.029797882|0.026945644|  
0.050262670|0.051291867|0.035175910|0.037624186|0.046428074|0.064708348|0.030036156|  
0.017752445|0.026173590|0.027250371|0.026763629|0.028069152|0.032164952|0.022185790|

0.024066075; 0.026283324; 0.023542846; 0.035148157; 0.029418340; 0.035261252; 0.023068238;  
0.043523216; 0.032716088; 0.035037585; 0.034351312; 0.038361684; 0.033171325; 0.029577445;  
0.032069904; 0.042437842; 0.038571054; 0.041329162; 0.038217280; 0.036726074; 0.032714133;  
0.031763643; 0.057848535; 0.057844430; 0.037699913; 0.074799836; 0.046165343; 0.035840301;  
0.360288159; 0.431044992; 0.396833731; 0.489487371; 0.456354918; 0.447834285; 0.365062231;  
0.041749333; 0.045036352; 0.028750200; 0.042186768; 0.052594688; 0.040052808; 0.033077128;  
0.075891602; 0.149266435; 0.097413278; 0.117652609; 0.141450456; 0.113157181; 0.076496031;  
0.043802950; 0.102291049; 0.063029040; 0.054855984; 0.122215391; 0.054947408; 0.044702196;  
0.063639393; 0.038159271; 0.045980412; 0.049344262; 0.054931596; 0.053138584; 0.039820664;  
0.722724215; 0.783100496; 0.787624728; 0.790345148; 0.814096770; 0.801327621; 0.737238331;  
0.451455491; 0.569987003; 0.544253713; 0.583913943; 0.599408835; 0.552882268; 0.479957475;  
0.028917446; 0.026330354; 0.030008350; 0.032489851; 0.033482886; 0.038137935; 0.025200451;  
0.046587730; 0.059831109; 0.046670015; 0.052025101; 0.058593919; 0.046682993; 0.040795005;  
0.271524214; 0.426221807; 0.308970633; 0.370116747; 0.398225014; 0.318287493; 0.277690293;  
0.061130570; 0.057937252; 0.059586024; 0.065736107; 0.078537838; 0.054401060; 0.047861581;  
0.204973236; 0.270061747; 0.202547072; 0.263093053; 0.239757973; 0.228846897; 0.186829670;  
0.041907576; 0.037811658; 0.047864631; 0.053010452; 0.034014468; 0.071403716; 0.028782953;  
0.024745278; 0.045294325; 0.033723440; 0.037781648; 0.038549571; 0.039243888; 0.027425501;  
0.084808234; 0.088129226; 0.079899374; 0.103170852; 0.091669350; 0.102273306; 0.075123742;  
0.020871258; 0.025665185; 0.026320620; 0.030570719; 0.031037429; 0.033466566; 0.022294408;  
0.297223250; 0.290980001; 0.277672558; 0.306744161; 0.312959609; 0.322450001; 0.252631391;  
0.082968148; 0.066508594; 0.066807087; 0.075346971; 0.076462198; 0.068750604; 0.059097849;  
0.053515798; 0.044641234; 0.041585276; 0.041062910; 0.041074620; 0.057130839; 0.035671832;  
0.032685021; 0.047714535; 0.045483190; 0.019068841; 0.026316083; 0.020476227; 0.021397867;  
0.105084881; 0.081350038; 0.086564864; 0.097327060; 0.124588178; 0.117588847; 0.085162850;  
0.416738523; 0.524255609; 0.333491240; 0.563007725; 0.523736672; 0.519584692; 0.381233713;  
0.043123576; 0.043048313; 0.040000008; 0.045080103; 0.044918258; 0.036392648; 0.031707034;  
0.019401952; 0.018667998; 0.015909354; 0.018970130; 0.022578087; 0.019758046; 0.015999960;  
0.804215059; 0.828442806; 0.794708655; 0.848311494; 0.861622384; 0.881335987; 0.780314342;  
0.022805623; 0.027205580; 0.021614659; 0.026942470; 0.030329331; 0.032145646; 0.022646297;  
0.037226609; 0.069175021; 0.064987464; 0.045535794; 0.085505769; 0.062572567; 0.039814699;  
0.016842483; 0.014678307; 0.022447155; 0.017217587; 0.018182269; 0.017891216; 0.014366851;  
0.086630956; 0.124385788; 0.059938963; 0.077375305; 0.080486220; 0.108024428; 0.057440032;  
0.050703340; 0.052415203; 0.067690500; 0.059410288; 0.040682038; 0.040275321; 0.034782463;  
0.032801237; 0.041929218; 0.050577309; 0.044531071; 0.059107083; 0.048572695; 0.035237638;  
0.062805535; 0.050394176; 0.059343028; 0.066458051; 0.058389193; 0.059291376; 0.051258035;  
0.326078469; 0.294529118; 0.330939360; 0.296432862; 0.326227247; 0.313486993; 0.271699639;  
0.046044740; 0.040905624; 0.042806097; 0.072257184; 0.064849340; 0.056334109; 0.041416278;  
0.057790979; 0.052760690; 0.046136778; 0.051533520; 0.065372783; 0.052922875; 0.040764530;  
0.838729097; 0.905724352; 0.876234328; 0.859053727; 0.905079670; 0.868616906; 0.843055466;  
0.330772180; 0.401826504; 0.446129764; 0.397288984; 0.483793116; 0.434791351; 0.361102256;  
0.026230134; 0.039611947; 0.033343157; 0.033377072; 0.038973587; 0.032304207; 0.025282583;  
0.029966755; 0.046293295; 0.030769183; 0.034994752; 0.033867861; 0.033806819; 0.026040600;  
0.025645749; 0.041305125; 0.027304499; 0.035595734; 0.035772171; 0.034996797; 0.025686756;

0.024432656|0.017313251|0.021481275|0.022837918|0.022869865|0.025954311|0.017911302|  
0.710820446|0.834569116|0.793492510|0.820492148|0.835607693|0.797110343|0.740320669|  
0.044668555|0.044161777|0.041431688|0.047678330|0.049184122|0.042288439|0.035698484|  
0.536599741|0.543676054|0.598436850|0.499134778|0.606188596|0.564070042|0.481350785|  
0.428884744|0.531342820|0.408575353|0.418004991|0.482603097|0.392150794|0.366169145|  
0.334817626|0.375843057|0.330298396|0.341380901|0.405264851|0.361540978|0.309977046|  
0.038894486|0.056235251|0.046870643|0.108469715|0.057822593|0.087514290|0.040951789|  
0.040993099|0.043773617|0.048729037|0.043074659|0.041869743|0.049256655|0.034334762|  
0.270605609|0.371374285|0.255448122|0.456072706|0.392029644|0.371786741|0.260898470|  
0.341652568|0.460023824|0.308214208|0.331363901|0.454423551|0.383398463|0.304767089|  
0.794715384|0.868332983|0.867488260|0.891276177|0.914403600|0.911979747|0.826004576|  
0.215487257|0.263396018|0.187493261|0.257600068|0.268827956|0.261931173|0.203192513|  
0.379865309|0.386845753|0.422595472|0.566233579|0.460257491|0.428461592|0.368881740|  
0.065802936|0.155141257|0.114146653|0.128533106|0.133126058|0.104829616|0.081517762|  
0.369875377|0.377882360|0.375150086|0.425590649|0.426623626|0.404478309|0.346861910|  
0.025289180|0.040901755|0.024004619|0.022699438|0.033050728|0.032042828|0.023352168|  
0.031331801|0.026149164|0.026532203|0.023482623|0.025511897|0.035889020|0.022870526|  
0.114300266|0.142408452|0.147996345|0.130921060|0.235766968|0.151642009|0.109969145|  
0.034738949|0.036769020|0.037200544|0.035920111|0.037275291|0.033868072|0.031130622|  
0.677036791|0.657170398|0.609528216|0.614468820|0.700362569|0.685072118|0.572800844|  
0.035278006|0.079959024|0.075839584|0.088428821|0.086021840|0.070040082|0.044757182|  
0.612031046|0.761653353|0.709424619|0.727297247|0.795650223|0.738621904|0.620977913|  
0.046072817|0.035345825|0.044965986|0.042280627|0.040096546|0.039817498|0.032059494|  
0.035698108|0.053155083|0.024518862|0.023803158|0.028481390|0.032911172|0.024128122|  
0.060229129|0.072147207|0.066053141|0.062330997|0.070971194|0.070677277|0.056280595|  
0.549681684|0.718757589|0.612605892|0.716375880|0.731892731|0.665524633|0.579297381|  
0.123944396|0.123845903|0.102800580|0.139476805|0.134111470|0.128337303|0.100865335|  
0.018872913|0.019902608|0.027917399|0.022161023|0.027679623|0.038052393|0.018417267|  
0.264722620|0.278842717|0.254674191|0.274523825|0.286291594|0.289995994|0.241653671|  
0.299067887|0.259234692|0.292956488|0.285492153|0.338080179|0.326710992|0.266104003|  
0.051538837|0.053776274|0.053021130|0.059242433|0.057139596|0.044626124|0.040862688|  
0.075549511|0.058672439|0.065054358|0.052875770|0.067783220|0.060871161|0.082650137|  
0.029116791|0.025992919|0.027844705|0.034323018|0.031921692|0.029870761|0.023118447|  
0.025035338|0.040349949|0.032128000|0.039120873|0.045021840|0.044083647|0.027545083|  
0.050218394|0.057407037|0.046684926|0.058569004|0.047852632|0.054783511|0.041961767|  
0.261914280|0.297818170|0.268645263|0.250439764|0.381303001|0.302429484|0.256882369|  
0.039549561|0.068208217|0.049770787|0.058024433|0.069472625|0.046560370|0.040231418|  
0.028528135|0.024002220|0.033269606|0.036530851|0.036256708|0.029652545|0.026069137|  
0.788535030|0.787907020|0.778167979|0.809629464|0.846849029|0.806771821|0.754849061|  
0.021738605|0.020256409|0.019964297|0.020738482|0.031994684|0.029311408|0.019171801|  
0.026097067|0.033020415|0.027373168|0.032544059|0.040898128|0.034113407|0.026239834|  
0.032439051|0.047337500|0.038164296|0.050916773|0.050656616|0.036169883|0.031115936|  
0.039915216|0.052918665|0.038651288|0.041402607|0.044874226|0.052768028|0.035733209|  
0.031562426|0.060057383|0.059032075|0.045007758|0.061996570|0.048767701|0.035322354|

0.770656848:0.827736757:0.757114476:0.852228515:0.833706612:0.841240322:0.755380935:  
0.040256254:0.049824377:0.043690538:0.052041019:0.043834467:0.066179684:0.037705468:  
0.030822692:0.055742151:0.035671867:0.044326539:0.081907991:0.046506312:0.033634826:  
0.335792505:0.341768976:0.342727107:0.374054664:0.366979733:0.348155618:0.310860705:  
0.865832029:0.846909725:0.859832211:0.863168487:0.848395320:0.874838330:0.815955408:  
0.267030871:0.296977507:0.277189486:0.321792589:0.292624410:0.306178077:0.259208399:  
0.034328562:0.050715499:0.041971363:0.056792275:0.084940634:0.048794343:0.037419444:  
0.029237313:0.100358369:0.054136262:0.042769756:0.076313159:0.043934315:0.033798825:  
0.080519766:0.100101074:0.082502889:0.126017082:0.112227701:0.098485768:0.068675229:  
0.039565033:0.049218510:0.031282489:0.053246108:0.051546200:0.055538562:0.035396505:  
0.401860674:0.426708904:0.428994764:0.412420555:0.489634537:0.419715877:0.372560040:  
0.485273662:0.448596786:0.451415305:0.510623155:0.528137994:0.541193609:0.424541730:  
0.184764014:0.179883885:0.133288701:0.126550677:0.209711714:0.202578151:0.115840972:  
0.028276640:0.033750034:0.027479722:0.033714141:0.059038246:0.045476858:0.025367830:  
0.034859246:0.029587848:0.023914789:0.034353884:0.035906148:0.034192294:0.026343590:  
0.022659716:0.024788956:0.020606847:0.024769693:0.031792108:0.025982934:0.020816262:  
0.022801761:0.027828029:0.032470559:0.025231907:0.032028462:0.025163453:0.020620330:  
0.033556615:0.034052415:0.025491568:0.038826226:0.041096217:0.043186659:0.027716139:  
0.026879820:0.026699734:0.031561212:0.027810694:0.031659977:0.027744362:0.024042922:  
0.074510727:0.132053457:0.109999163:0.139689375:0.127790462:0.121287160:0.065599804:  
0.076611245:0.056404882:0.095054491:0.162710431:0.090550931:0.083409443:0.057547188:  
0.024473883:0.030661023:0.023504146:0.027249785:0.034652086:0.041298189:0.024084199:  
0.036059507:0.038139561:0.042090711:0.035596019:0.055908251:0.034631050:0.026970015:  
0.028561324:0.022726110:0.020139849:0.046169078:0.025578684:0.024310790:0.017825343:  
0.055976900:0.132779302:0.060430364:0.055356207:0.118692802:0.072986980:0.052633399:  
0.060121142:0.085518295:0.056857466:0.081007762:0.082940379:0.086400598:0.056459086:  
0.073903720:0.091144131:0.640388342:0.034184886:0.671287398:0.460832482:0.066197145:  
0.037414326:0.028493044:0.024825276:0.031959329:0.036296240:0.030630182:0.024075488:  
0.728902514:0.820585679:0.760433315:0.797062068:0.857112706:0.783807217:0.734485006:  
0.063520508:0.051179484:0.063325854:0.066489265:0.059424959:0.067471456:0.054077792:  
0.035527973:0.062771269:0.035054876:0.040794915:0.053877726:0.034614207:0.030870162:  
0.041411798:0.030086111:0.039153933:0.045949743:0.030921552:0.042162564:0.029956164:  
0.157389396:0.087766769:0.096695500:0.110348938:0.113197028:0.102667776:0.094768515:  
0.031027653:0.030528175:0.029634975:0.033526191:0.046323789:0.044204304:0.029484239:  
0.027107987:0.030330678:0.027113916:0.032442495:0.027876057:0.036483299:0.025966371:  
0.080027144:0.076354806:0.084074084:0.103734858:0.110513773:0.102579035:0.071899236:  
0.293186131:0.309252076:0.279813764:0.324008102:0.385535483:0.318629652:0.272320963:  
0.401530727:0.402844845:0.399583638:0.440934841:0.496208387:0.452751013:0.377918564:  
0.330260478:0.407136184:0.261808037:0.307088692:0.338488172:0.313515455:0.239631410:  
0.018356654:0.016907151:0.013947129:0.021166340:0.019564855:0.019230965:0.014869474:  
0.368467069:0.353755447:0.289494345:0.243348658:0.369277843:0.355872905:0.272952001:  
0.102923398:0.098887269:0.092738219:0.103134425:0.100324706:0.094423388:0.083199398:  
0.280434279:0.336604741:0.283993250:0.371935586:0.374914894:0.272866822:0.239383074:  
0.835340426:0.892800941:0.896826453:0.882006877:0.903202424:0.886454528:0.840951433:

0.630175481!0.671932906!0.651502478!0.649708619!0.717561800!0.695513552!0.621329088!  
0.029318257!0.047543863!0.040861689!0.043180097!0.053625842!0.045918657!0.035289245!  
0.025472189!0.045823657!0.028722490!0.024028823!0.037527145!0.035620848!0.024399400!  
0.526877154!0.637259026!0.507014977!0.657081391!0.686964936!0.575348408!0.513383897!  
0.027695910!0.033871413!0.025555582!0.033906229!0.040249867!0.043134911!0.028492196!  
0.504157560!0.761047812!0.683190220!0.701727396!0.818831774!0.775611775!0.611340259!  
0.122916794!0.248311049!0.143720971!0.179739400!0.128978054!0.105883006!0.111723511!  
0.894312960!0.903948437!0.894574591!0.914743254!0.930379214!0.928711235!0.884886049!  
0.531365978!0.636159630!0.503267092!0.526800547!0.542563031!0.525132526!0.453178504!  
0.560696049!0.602042781!0.522404118!0.613175264!0.588630379!0.583440644!0.519304878!  
0.264350699!0.288245425!0.250157539!0.278859111!0.341459699!0.391786382!0.231425464!  
0.614333732!0.686039020!0.731283427!0.697962150!0.675219493!0.691035485!0.632436760!  
0.040506324!0.038319282!0.035319491!0.041420303!0.025244717!0.047012763!0.029472070!  
0.024428850!0.030120132!0.024451753!0.039868147!0.040497078!0.028925986!0.025153008!  
0.896346792!0.922526053!0.898191242!0.912822937!0.923529288!0.926207073!0.891687131!  
0.035609175!0.067168412!0.054277925!0.067090824!0.084299830!0.070303233!0.043356365!  
0.031208619!0.048176775!0.037772996!0.046370199!0.054140667!0.049713234!0.034280351!  
0.327872774!0.356796439!0.372893691!0.377285002!0.414930749!0.417241338!0.327993576!  
0.030997844!0.032623047!0.031699516!0.035887533!0.036819812!0.040420747!0.028908848!  
0.051584008!0.035809202!0.035616483!0.054842724!0.050298411!0.048673338!0.037318861!  
0.306633109!0.362397875!0.296126182!0.328632310!0.346314598!0.361229512!0.287271505!  
0.121632243!0.062972018!0.181185677!0.058409885!0.064201398!0.111552417!0.219243044!  
0.045569205!0.090015529!0.078276384!0.078477289!0.081900367!0.067544819!0.054041902!  
0.034934544!0.032916994!0.035934166!0.032548396!0.037115956!0.038814098!0.030193543!  
0.017380087!0.017057103!0.016077016!0.017314787!0.019536804!0.020917330!0.015411685!  
0.022052730!0.019721963!0.021631709!0.023572535!0.020404073!0.026748244!0.019857777!  
0.030744661!0.030671573!0.047124536!0.032198940!0.039210021!0.029252037!0.026478105!  
0.037780605!0.035551074!0.027358437!0.028300675!0.043261553!0.039699209!0.029048530!  
0.906060329!0.900733007!0.874761860!0.923698208!0.926951495!0.920910268!0.879335660!  
0.028612863!0.032566965!0.026216146!0.031907122!0.026881330!0.027258544!0.023956625!  
0.900405350!0.904190325!0.920889523!0.919313625!0.926390700!0.904368418!0.895663545!  
0.802149163!0.868775637!0.859594816!0.866061858!0.884364677!0.870147348!0.828844680!  
0.306715771!0.322523026!0.259264988!0.273238274!0.335181332!0.365742395!0.258374377!  
0.077346537!0.196491885!0.091048107!0.105950753!0.158671779!0.104492351!0.079187629!  
0.251516769!0.286654500!0.233721347!0.252653409!0.273625260!0.281120890!0.216041517!  
0.547610010!0.565300885!0.558132976!0.479489620!0.548692773!0.556545351!0.485693762!  
0.082341081!0.050055293!0.053910735!0.059544336!0.059730146!0.062622610!0.050321063!  
0.132325964!0.125521175!0.125118039!0.138730920!0.128235105!0.148414174!0.111766825!  
0.828213201!0.898523276!0.886346928!0.903523164!0.903872778!0.904164877!0.843228766!  
0.303508668!0.364236320!0.320326010!0.354800919!0.350709414!0.354899210!0.289523110!  
0.019053987!0.028671574!0.023850950!0.027562423!0.029748016!0.020838047!0.019940837!  
0.044775276!0.040378322!0.035881809!0.039087764!0.043967249!0.049625669!0.034876133!  
0.019523779!0.019923556!0.017886335!0.020298050!0.027430753!0.024861294!0.017453385!  
0.485287682!0.576764363!0.513460068!0.566777457!0.650641001!0.607039677!0.481845293!

0.019311798 0.019212444 0.024350138 0.024302605 0.023631985 0.020117006 0.018452013  
0.035213119 0.027363019 0.032728343 0.042698250 0.033676738 0.043896430 0.030300954  
0.564113398 0.521625918 0.501568586 0.514248152 0.608897193 0.625496477 0.492352118  
0.056599262 0.093246878 0.077757272 0.067085014 0.087777698 0.087571676 0.056798780  
0.028008596 0.023695378 0.021080507 0.028642348 0.026994367 0.034669280 0.022886298  
0.834422396 0.885197513 0.856593152 0.884914387 0.905319214 0.871223185 0.821478591  
0.200527800 0.170510519 0.146201504 0.223665808 0.217303936 0.178443266 0.155419837  
0.027177409 0.047110208 0.030530792 0.044602714 0.046037269 0.036859278 0.029759387  
0.024764161 0.035150599 0.034455409 0.036910904 0.034587749 0.031015354 0.027658811  
0.285146504 0.271937525 0.268322659 0.288124969 0.290071767 0.285727913 0.241342158  
0.031101876 0.024749890 0.026225735 0.027377525 0.034465715 0.028066772 0.024105815  
0.019640145 0.041826715 0.025805494 0.033152835 0.031720887 0.036827480 0.022679653  
0.129675069 0.230206088 0.114055765 0.184221436 0.223015423 0.189400963 0.120206145  
0.048740886 0.054734750 0.042916251 0.052118143 0.055354099 0.049431473 0.041265306  
0.021536416 0.019960747 0.018339189 0.027450292 0.030973508 0.021412243 0.019324641  
0.029758218 0.033586194 0.026761772 0.028417034 0.047326345 0.040218892 0.027459697  
0.032201517 0.042639226 0.031089692 0.036239415 0.037363006 0.041046319 0.028205300  
0.023575006 0.024340491 0.025037051 0.026468440 0.028845717 0.025832465 0.020095351  
0.330847498 0.418407086 0.281093492 0.460176063 0.478649251 0.437242003 0.314665324  
0.487390550 0.531274626 0.482850316 0.487041886 0.577669310 0.534671133 0.462841492  
0.039382152 0.054950323 0.041375642 0.053567611 0.047148773 0.060197646 0.038502103  
0.023166774 0.020836650 0.020461584 0.022100896 0.026882949 0.027412431 0.020037789  
0.832442036 0.856177829 0.779916571 0.843831134 0.884595188 0.877060253 0.880893039  
0.813456529 0.875243458 0.883403408 0.890804650 0.908755495 0.877135525 0.837112118  
0.025746752 0.023354873 0.033494354 0.025840273 0.026278300 0.024346538 0.022432368  
0.424722817 0.490200277 0.426394013 0.503944957 0.443604890 0.457325671 0.389029575  
0.253522942 0.225535206 0.296247865 0.246286807 0.304906171 0.332394903 0.223542099  
0.036200097 0.043912996 0.040363743 0.043097245 0.040034334 0.039940130 0.034643600  
0.031083244 0.027823730 0.038014210 0.037082762 0.050271352 0.032962238 0.030997672  
0.051246813 0.042236913 0.038168788 0.036583312 0.042616243 0.041050450 0.034302492  
0.423938799 0.555611158 0.499236120 0.426791425 0.510933271 0.465969229 0.401376435  
0.560180446 0.652951124 0.618462535 0.681363588 0.720722926 0.667626655 0.581324545  
0.053778030 0.036598650 0.043143166 0.054990542 0.046695773 0.041483214 0.037239657  
0.058164367 0.078704844 0.111408715 0.069287430 0.088387797 0.083806303 0.058729654  
0.067992432 0.114846719 0.105513384 0.107496537 0.110905133 0.086848338 0.067920922  
0.580621762 0.685572488 0.556263175 0.699884812 0.719947930 0.669990612 0.558631260  
0.070844682 0.078987103 0.072202598 0.089889194 0.130498288 0.122511591 0.064130005  
0.023433308 0.016140238 0.017084966 0.017550494 0.016561722 0.020495565 0.014622038  
0.511388569 0.535399245 0.526783474 0.618434879 0.588811362 0.584700993 0.499371180  
0.921520438 0.912947195 0.911409789 0.928385364 0.935603357 0.935484892 0.911258330  
0.452698074 0.547467050 0.434856830 0.375063354 0.482657170 0.471134443 0.344321104  
0.179485012 0.132623559 0.085958062 0.093243631 0.100647002 0.123756814 0.149603536  
0.027307927 0.027923836 0.027165785 0.025920104 0.027996985 0.030258065 0.023703264  
0.022369896 0.028558941 0.027637153 0.033818658 0.046136064 0.028870838 0.023910576

0.071103970;0.146787807;0.119026176;0.115820204;0.119273847;0.140994844;0.088665262;  
0.051217826;0.067468478;0.058020844;0.068117201;0.087350036;0.070186492;0.051458589;  
0.031618580;0.025428048;0.037699040;0.027543124;0.032493906;0.036305885;0.023730164;  
0.131913088;0.117241133;0.100636843;0.135750876;0.116708604;0.136103647;0.101794902;  
0.744706110;0.899096368;0.835923391;0.877945480;0.898062742;0.785606029;0.755518428;  
0.035308407;0.030763003;0.046191231;0.061089124;0.043668074;0.051109462;0.034753629;  
0.031426927;0.032109748;0.027126134;0.039007619;0.043785906;0.044769807;0.029577677;  
0.173615924;0.184450940;0.107006421;0.098666381;0.160186395;0.154179370;0.108393659;  
0.028533009;0.029525663;0.031443958;0.031630397;0.026097465;0.033607274;0.024036297;  
0.885747576;0.918172662;0.908465255;0.903826206;0.917520806;0.928948621;0.890617489;  
0.032344177;0.019195008;0.042399963;0.036224730;0.022590909;0.043484625;0.021021336;  
0.033175036;0.051965511;0.043981277;0.040444084;0.056009443;0.064822298;0.032065137;  
0.019135038;0.029978276;0.021391879;0.028520650;0.029226249;0.026108953;0.020683999;  
0.852659136;0.899025328;0.891932967;0.874985645;0.877021378;0.896654407;0.836111804;  
0.647782775;0.728637865;0.676678728;0.736689216;0.806146839;0.749865116;0.619925937;  
0.025061678;0.019201711;0.024141591;0.020110018;0.026291176;0.021439074;0.019093399;  
0.092698074;0.102340919;0.103017930;0.143850852;0.180681687;0.097960115;0.083582564;  
0.051781505;0.061933604;0.046210629;0.050159402;0.058514069;0.057969007;0.043939588;  
0.693178963;0.695014943;0.808619544;0.752058366;0.797946940;0.866826043;0.861427571;  
0.025897882;0.045802550;0.027990775;0.028223111;0.041813471;0.028342550;0.022997996;  
0.139436068;0.162918195;0.131411772;0.188891631;0.178085407;0.123837172;0.126796598;  
0.035825755;0.032149893;0.024229605;0.033703031;0.033580880;0.026853104;0.025195711;  
0.033881308;0.052972353;0.037922764;0.053616216;0.050639326;0.040557103;0.033534696;  
0.545368293;0.561234558;0.511171770;0.598012918;0.547667764;0.567908780;0.475666553;  
0.057553122;0.066094900;0.053736457;0.059773942;0.061166031;0.073296483;0.052213666;  
0.329097654;0.353995346;0.372451774;0.357527266;0.412159133;0.347543610;0.309954178;  
0.034831190;0.043558043;0.047213643;0.052938714;0.055863870;0.056967051;0.040945962;  
0.038346856;0.032758791;0.048433127;0.063650547;0.057307613;0.043315163;0.036014327;  
0.456164129;0.563867355;0.559924559;0.536876166;0.670796144;0.558816843;0.492540644;  
0.017663567;0.019432934;0.017572723;0.030942443;0.022186350;0.018992543;0.016450996;  
0.438317145;0.458742839;0.487798864;0.494347971;0.561023366;0.548411198;0.448784383;  
0.546386702;0.620343233;0.551193366;0.622872269;0.634054605;0.636692061;0.542742881;  
0.030884306;0.050243667;0.047512249;0.047058856;0.054535655;0.050695847;0.036478128;  
0.039922977;0.051416062;0.041465279;0.041013000;0.059714084;0.043218893;0.033829559;  
0.033352045;0.043052663;0.047307574;0.038116540;0.040196011;0.038149853;0.032867342;  
0.020819407;0.029414727;0.020581034;0.029953350;0.033907424;0.027631551;0.020435524;  
0.067466261;0.102547659;0.078142759;0.065555015;0.113575275;0.089452375;0.058660479;  
0.042520242;0.038516206;0.042860464;0.037667911;0.073882944;0.057837823;0.035333413;  
0.026187267;0.057531495;0.035162370;0.038820949;0.060301176;0.034240304;0.028430929;  
0.053795345;0.059283949;0.036381367;0.038335566;0.061746947;0.040564681;0.036254336;  
0.052761576;0.057189462;0.062669612;0.065137118;0.067873667;0.065760422;0.054962337;  
0.041907902;0.117504408;0.073662209;0.076720271;0.098918213;0.080228976;0.054126262;  
0.039764449;0.048873115;0.040715903;0.039777343;0.052417505;0.035977607;0.035034312;  
0.256233488;0.247131315;0.258723580;0.284789520;0.289268155;0.298791972;0.238253813;

0.052861535:0.058122966:0.050384783:0.063778492:0.064304517:0.078141547:0.048195604:  
0.319838239:0.493888965:0.395151044:0.506019467:0.415944281:0.430977289:0.330170461:  
0.443829389:0.625984151:0.525285217:0.658139784:0.558352935:0.513306138:0.449287793:  
0.509213879:0.559712364:0.518200312:0.444626108:0.531621579:0.509737628:0.454080358:  
0.072925945:0.067725817:0.058491815:0.075472775:0.086911466:0.063199230:0.053689743:  
0.051486863:0.056523774:0.056254339:0.058927103:0.067750614:0.060220921:0.048113201:  
0.034576868:0.053822728:0.056175598:0.091030464:0.075666759:0.075817968:0.044933996:  
0.469449026:0.528593386:0.489706529:0.550545997:0.596558351:0.535595231:0.461034910:  
0.524426793:0.656156222:0.596664747:0.663101275:0.687814348:0.640051383:0.564688278:  
0.925202686:0.956056076:0.970169577:0.974280666:0.978378664:0.971407586:0.975526546:  
0.822047402:0.826357430:0.843527218:0.859517149:0.883110589:0.890228171:0.824272686:  
0.027116599:0.029423958:0.055357214:0.038519726:0.050425503:0.050314439:0.031285430:  
0.046094956:0.081170469:0.061977947:0.054891219:0.076984921:0.054454121:0.050144365:  
0.026188573:0.041805828:0.037819938:0.031685093:0.034325528:0.029124672:0.025852596:  
0.520005828:0.508473456:0.493174743:0.495963642:0.572493144:0.557943603:0.444895797:  
0.171674761:0.280340934:0.161823393:0.252583599:0.266978765:0.370032462:0.171782441:  
0.243613058:0.252783645:0.246144486:0.301806294:0.368747524:0.287469841:0.231795187:  
0.351576844:0.330862254:0.327140121:0.341802957:0.364876398:0.370294086:0.300955562:  
0.209924984:0.167137846:0.205612845:0.229196764:0.180482846:0.134798282:0.129109726:  
0.055653095:0.060602585:0.069333266:0.050782114:0.077674482:0.068371457:0.047828785:  
0.025072187:0.039433587:0.056478427:0.028988427:0.037906223:0.034394951:0.023104809:  
0.030048609:0.022280084:0.027312605:0.035804665:0.025040029:0.031868387:0.023562918:  
0.237982757:0.393578761:0.284611671:0.284217893:0.280332795:0.327971149:0.232627971:  
0.238890917:0.287521945:0.225280115:0.281147303:0.346350264:0.256087931:0.207055727:  
0.182835804:0.292320617:0.140605782:0.262822480:0.235614616:0.186441270:0.168916370:  
0.373644590:0.424550055:0.402560815:0.451362856:0.468959383:0.465154612:0.380268770:  
0.524683828:0.538865300:0.531784206:0.558635768:0.610706338:0.591423507:0.489183501:  
0.236091403:0.281519511:0.189855430:0.222089862:0.240697385:0.254594298:0.181388360:  
0.645174314:0.799353489:0.688219526:0.789909688:0.781064077:0.745104144:0.678930198:  
0.041953717:0.039993054:0.040364390:0.042486804:0.041802750:0.056088944:0.035949033:  
0.042123457:0.040920872:0.037262419:0.040359143:0.062624456:0.045471683:0.035627172:  
0.035779411:0.028737256:0.027221076:0.036449491:0.046823947:0.022428887:0.025509278:  
0.018310856:0.025709210:0.026361130:0.021106454:0.024029420:0.020488363:0.018085416:  
0.033092592:0.034173364:0.031962452:0.033539480:0.041183820:0.042298637:0.028528353:  
0.811845664:0.899120432:0.867979782:0.909102817:0.927319547:0.926265376:0.864004288:  
0.045106610:0.038563135:0.045189602:0.039935164:0.048760155:0.040246876:0.036583758:  
0.552132422:0.676968364:0.660711783:0.645881470:0.649665247:0.679866906:0.559891011:  
0.054231786:0.041859203:0.042535399:0.054210974:0.051041508:0.061445933:0.037993410:  
0.049787874:0.091839422:0.069673237:0.109313685:0.080126679:0.093264157:0.061071641:  
0.027551519:0.021921239:0.025264294:0.025474723:0.027998930:0.028778442:0.020413678:  
0.285516153:0.401303711:0.319787575:0.342516978:0.382176314:0.356945357:0.295104462:  
0.318972532:0.336003051:0.327159365:0.335516647:0.383683380:0.385465366:0.273127010:  
0.827016643:0.857199253:0.834718232:0.844424977:0.862802091:0.829530352:0.806664012:  
0.025363813:0.045362502:0.032412005:0.039923886:0.055115560:0.037333231:0.026850068:



0.042289792 0.106307113 0.062913926 0.087891540 0.114686577 0.066159503 0.049474379  
0.038475762 0.076961097 0.064257468 0.044699690 0.058886566 0.066381332 0.043455867  
0.018825189 0.019785312 0.029522932 0.023823700 0.025656409 0.024996573 0.019606422  
0.602720724 0.650987952 0.707762404 0.797920769 0.729333439 0.636861039 0.604212803  
0.031327750 0.068048278 0.050616879 0.060136309 0.115673513 0.065375323 0.038459650  
0.058314051 0.053158709 0.039702673 0.048443735 0.051696515 0.043456004 0.038363228  
0.929601720 0.883811004 0.926147925 0.923556679 0.920949240 0.945029578 0.944688082  
0.053546493 0.054385955 0.042744322 0.044357059 0.058214647 0.054661889 0.042286591  
0.059526518 0.139426170 0.110815685 0.146228671 0.145906861 0.114842881 0.075031800  
0.261426724 0.231599029 0.216169996 0.170714763 0.294215843 0.265665420 0.200259274  
0.077015372 0.071473838 0.069191625 0.077339042 0.078470955 0.081853465 0.054411058  
0.501097788 0.538072842 0.505813398 0.546785336 0.584984394 0.598995852 0.493117009  
0.217714948 0.261098698 0.179792551 0.218246310 0.226169442 0.249003486 0.180201681  
0.038860961 0.075214166 0.052644887 0.040503761 0.082728048 0.064276922 0.041810324  
0.622110247 0.820975182 0.730594060 0.738795409 0.785215646 0.752489654 0.668493793  
0.061267243 0.049497690 0.059906157 0.057240131 0.056335987 0.064948086 0.049618338  
0.949529339 0.967303507 0.912849426 0.913497333 0.945006433 0.962072323 0.967455724  
0.514352262 0.549970440 0.414581520 0.510135872 0.521263513 0.555271337 0.357291879  
0.025602862 0.053038083 0.032037075 0.033212307 0.042259984 0.031040356 0.028593950  
0.069269257 0.054705238 0.066206531 0.076406468 0.083211243 0.078117442 0.056705761  
0.034616862 0.067486656 0.045996880 0.062405114 0.059259324 0.069646740 0.037951495  
0.026795468 0.033665884 0.037091069 0.032149246 0.036535333 0.047077423 0.026597274  
0.137412220 0.118714590 0.127410471 0.151553013 0.164422783 0.152572936 0.117793873  
0.096806188 0.093494661 0.087854101 0.116878081 0.113309392 0.113922751 0.089874244  
0.487934863 0.525104224 0.432882820 0.501385285 0.536724828 0.405114628 0.348136024  
0.042293556 0.054675714 0.049987458 0.045271312 0.057661381 0.054822547 0.037433541  
0.091860938 0.199970952 0.158617620 0.182158023 0.198102672 0.186360062 0.115389934  
0.793254154 0.799736145 0.800215922 0.813739312 0.849705349 0.848059563 0.752264836  
0.024191463 0.042740329 0.034159412 0.032288617 0.040298892 0.037531076 0.026846857  
0.176759303 0.167263706 0.195762592 0.222376426 0.203652216 0.191827631 0.159924047  
0.536718432 0.619001013 0.549907004 0.606672712 0.649451880 0.570902567 0.521567257  
0.152508543 0.200378284 0.172080623 0.255007874 0.217552153 0.172046134 0.160168486  
0.714992089 0.857802420 0.786134663 0.801127790 0.851891230 0.814775367 0.741977938  
0.519304642 0.705604595 0.587482017 0.656347766 0.748728839 0.639011750 0.552669250  
0.553128162 0.622105968 0.614230289 0.573478402 0.525703235 0.577806709 0.491919655  
0.096855151 0.118539642 0.200682134 0.199645126 0.167336873 0.134830876 0.107187873  
0.026704602 0.042494817 0.033937266 0.047907579 0.040016671 0.046234759 0.032152169  
0.038562123 0.051528874 0.040517378 0.046418409 0.052732957 0.056926923 0.037792312  
0.850935928 0.845007459 0.851892664 0.827456541 0.885154836 0.890099782 0.819558714  
0.517711262 0.590891700 0.528624271 0.591765068 0.593315276 0.563074731 0.501172807  
0.042267939 0.061754430 0.048594739 0.053259567 0.057406841 0.065315911 0.042176367  
0.537048110 0.581143787 0.526693265 0.588828267 0.559357071 0.587744761 0.521736258  
0.049257757 0.114828481 0.076025211 0.066494540 0.077290502 0.053616584 0.046952544  
0.033748170 0.030674385 0.368930721 0.027741037 0.435589459 0.277826672 0.037350847

0.025919512!0.026266120!0.027234779!0.040674778!0.028262190!0.035082599!0.024366753!  
0.336570812!0.336038667!0.329730130!0.398245209!0.391133098!0.371560577!0.319918326!  
0.051184729!0.061004144!0.050499726!0.044792273!0.044418924!0.050315488!0.039666143!  
0.540144356!0.582751937!0.602970199!0.642652272!0.649768322!0.609963253!0.534735268!  
0.032939356!0.045340488!0.037982144!0.038471830!0.039381848!0.036588030!0.033248686!  
0.316052168!0.314775737!0.329008239!0.349992210!0.361773731!0.379671802!0.304185737!  
0.051062298!0.067468848!0.069168347!0.074757521!0.077395102!0.064217064!0.056106142!  
0.831306176!0.775756501!0.834452234!0.878843891!0.874364725!0.844087934!0.784556385!  
0.025183917!0.021004055!0.020231271!0.032341207!0.033666595!0.025517564!0.020598836!  
0.475987424!0.565474997!0.591608451!0.601928630!0.642691842!0.589069140!0.511796092!  
0.489045726!0.691776000!0.519227296!0.667417075!0.606764081!0.643437113!0.496076726!  
0.019109808!0.026793531!0.019535416!0.022659096!0.027179256!0.026522290!0.019696690!  
0.029677230!0.036064293!0.024718083!0.027585369!0.030972757!0.021434068!0.022396148!  
0.027916742!0.024365604!0.024413821!0.028171763!0.033347869!0.031034448!0.023729615!  
0.488448272!0.549705679!0.512295775!0.519248400!0.580414482!0.581206188!0.460151716!  
0.021448376!0.035652290!0.038459513!0.032756555!0.044042866!0.037362200!0.027975133!  
0.732181498!0.845318596!0.754824294!0.792096819!0.798742069!0.809225367!0.726656965!  
0.463097868!0.577716519!0.457467905!0.499498662!0.562385148!0.528547432!0.436956922!  
0.542031417!0.719240077!0.690170908!0.796001406!0.720198301!0.651102746!0.579171870!  
0.023261618!0.027825530!0.024858669!0.031748870!0.031062965!0.028760953!0.021702468!  
0.019707882!0.022562465!0.019912560!0.019913553!0.026170112!0.018446268!0.017319290!  
0.286054228!0.295975535!0.294875816!0.310440193!0.312677319!0.319724186!0.262407449!  
0.398053020!0.512094533!0.419051332!0.515902839!0.500076370!0.496866426!0.397500614!  
0.027212603!0.048266517!0.033249713!0.038413644!0.049891400!0.047127245!0.030756190!  
0.214341880!0.162976381!0.234474386!0.198342697!0.202822463!0.222248868!0.158128961!  
0.781980236!0.802665841!0.805058842!0.815674793!0.854732041!0.822948589!0.769953249!  
0.031888171!0.048549100!0.030397482!0.046198862!0.045181367!0.036106394!0.029415460!  
0.182554049!0.151917720!0.115687617!0.130854153!0.169207178!0.174154565!0.126133674!  
0.292356297!0.241019314!0.250995576!0.252098258!0.316148721!0.253988086!0.216797602!  
0.021243619!0.020433565!0.019144813!0.020828885!0.022478520!0.031515075!0.018850711!  
0.018974331!0.017043830!0.015463581!0.016168660!0.018522607!0.014925620!0.014444283!  
0.060346224!0.052760443!0.038310144!0.050960905!0.067161289!0.061352023!0.044071659!  
0.032478443!0.026629876!0.026378173!0.028644633!0.036659032!0.031707772!0.024836330!  
0.022746584!0.035474246!0.027929866!0.026723536!0.031631344!0.029310260!0.023568375!  
0.046110657!0.050799261!0.055922003!0.068915737!0.063185278!0.078149611!0.047371617!  
0.040309707!0.032133848!0.033583300!0.034510700!0.040322987!0.035656570!0.029622172!  
0.799895628!0.866410274!0.862424446!0.857120597!0.858444993!0.837601084!0.819311224!  
0.016569068!0.013722080!0.017618366!0.019087171!0.020168476!0.034052692!0.015194776!  
0.793390561!0.741130874!0.815629277!0.830457888!0.736210803!0.827170341!0.833331718!  
0.031911774!0.047249149!0.044172030!0.053305891!0.065881363!0.043812995!0.036827296!  
0.028325235!0.034445013!0.027583668!0.026973219!0.035130828!0.032435617!0.025853010!  
0.029089821!0.040195359!0.036821831!0.066398067!0.034803748!0.052188300!0.033063911!  
0.029472362!0.032862431!0.030702938!0.032152931!0.033316663!0.024625791!0.025622809!  
0.030060366!0.046381542!0.037225043!0.040548115!0.052537731!0.040351276!0.033779686!

0.634702375|0.817140678|0.721121420|0.754356203|0.813179391|0.733262140|0.652991007|  
0.503099234|0.561751152|0.570778185|0.598776297|0.642246917|0.598625209|0.519602727|  
0.449573375|0.595363899|0.512654296|0.583227105|0.605297514|0.518017379|0.450874299|  
0.020992963|0.022402812|0.024523293|0.029456727|0.025758738|0.025014934|0.019202703|  
0.511064203|0.580821316|0.589186506|0.597784895|0.613231233|0.598831421|0.522987907|  
0.073067006|0.059690196|0.048725241|0.073016643|0.059860010|0.061628450|0.050713067|  
0.649284432|0.715956276|0.700414555|0.687066432|0.785909360|0.770194504|0.657761299|  
0.059191121|0.058062825|0.074247925|0.075471474|0.069097720|0.101201096|0.053253279|  
0.578395830|0.621671506|0.603310809|0.647053476|0.660450812|0.681710851|0.585878274|  
0.770972267|0.787097084|0.814209193|0.827011409|0.861109561|0.822979510|0.767532351|  
0.084715020|0.081835721|0.070485341|0.089785308|0.091613277|0.091783816|0.070916677|  
0.386099844|0.448491409|0.410751782|0.503251801|0.506296382|0.474877918|0.397575672|  
0.017935878|0.014624552|0.016058101|0.018391266|0.016922371|0.018962363|0.014976713|  
0.140431416|0.149549961|0.179779256|0.207304628|0.087326794|0.229436015|0.123515260|  
0.037730248|0.045384915|0.031377222|0.031742778|0.041456413|0.029688891|0.030208952|  
0.625318218|0.669718398|0.621530900|0.766867535|0.766890057|0.686905343|0.610586321|  
0.140031760|0.240309114|0.116434693|0.170312679|0.234080196|0.197264756|0.103757305|  
0.032737970|0.041629185|0.054632068|0.054827696|0.041795936|0.054958379|0.035627454|  
0.034727218|0.037101691|0.041265108|0.033344760|0.049945127|0.038435982|0.028876395|  
0.569963510|0.731834066|0.644840625|0.747180956|0.792816536|0.742276403|0.638407373|  
0.063187189|0.089909891|0.068779460|0.084586903|0.077743815|0.075889371|0.060412066|  
0.046691835|0.046461766|0.049712412|0.045769586|0.054126144|0.064274303|0.043391503|  
0.566369540|0.713408547|0.727169883|0.687060021|0.667199619|0.719301989|0.603784334|  
0.852195407|0.893016927|0.451322091|0.898415182|0.548036148|0.755348915|0.452373038|  
0.855055577|0.879760164|0.871726512|0.890422765|0.901006645|0.884929926|0.857019583|  
0.067919176|0.068454303|0.059818385|0.069712329|0.077110041|0.107763040|0.059037746|  
0.600919338|0.710951477|0.664199209|0.685265524|0.734660074|0.712676498|0.642264308|  
0.035130997|0.046662012|0.041070969|0.055514482|0.053698964|0.047072936|0.035571411|  
0.034842537|0.098608450|0.046477833|0.057458817|0.050206904|0.050498188|0.038872187|  
0.035908399|0.072161605|0.054995526|0.050885009|0.075107643|0.065353129|0.045169170|  
0.031080276|0.031740819|0.028576956|0.034949275|0.033341737|0.029745440|0.027035101|  
0.028464109|0.031408585|0.032209679|0.037477190|0.036786116|0.038604848|0.026284907|  
0.053074945|0.043356468|0.039287749|0.039988304|0.073268427|0.047029292|0.037518595|  
0.063646920|0.059459277|0.065093950|0.043295304|0.044054670|0.061703522|0.089317957|  
0.022887579|0.016936866|0.016673553|0.028239765|0.017499403|0.018984853|0.015870203|  
0.411532703|0.498745462|0.470789995|0.591892830|0.537851625|0.528204450|0.403751793|  
0.042376195|0.069188955|0.475837602|0.102796709|0.559706778|0.311509984|0.058833150|  
0.052511165|0.061811804|0.049763701|0.068510556|0.057490895|0.071536552|0.047508955|  
0.058469582|0.041111045|0.042067134|0.033575869|0.048782910|0.065196845|0.038512288|  
0.221215556|0.197243098|0.185710069|0.253505884|0.225161717|0.244261764|0.186899792|  
0.066428632|0.082120311|0.066003892|0.075756491|0.102723074|0.077101405|0.065236567|  
0.151285242|0.223931578|0.149998084|0.229879792|0.277162811|0.243054390|0.148601652|  
0.729085874|0.812700985|0.747460951|0.782642896|0.801676147|0.765326785|0.699973782|  
0.164849598|0.244859625|0.193987175|0.318628675|0.317410365|0.224318716|0.172191040|

0.751104940|0.800130405|0.749637021|0.801656510|0.772421350|0.831829159|0.734324620|  
0.041731321|0.034436004|0.029557923|0.031600308|0.031153325|0.023940382|0.026816135|  
0.472063659|0.577633158|0.519360485|0.492923898|0.576471666|0.569261908|0.471717772|  
0.521871180|0.638390395|0.516642934|0.616196763|0.634661739|0.580831821|0.519844115|  
0.062967052|0.057999390|0.053601215|0.075520056|0.059223497|0.069384544|0.050670878|  
0.027941865|0.041497450|0.038460801|0.026427412|0.036505179|0.026367928|0.025887748|  
0.753436775|0.861163696|0.830052666|0.845484526|0.840777917|0.835206659|0.754456585|  
0.037847209|0.045668827|0.039294639|0.048691906|0.077648800|0.057949804|0.038562721|  
0.607731034|0.573401224|0.592226444|0.634078227|0.639253827|0.642725546|0.527844477|  
0.018926970|0.025240472|0.020878042|0.020648229|0.022326044|0.030733093|0.018241211|  
0.125873916|0.083748600|0.110584629|0.079674530|0.095354152|0.147678613|0.081323192|  
0.497296204|0.532266364|0.569809583|0.526302534|0.549080453|0.496740141|0.487076559|  
0.321057643|0.347309130|0.347591595|0.378296224|0.394062248|0.394611158|0.331953072|  
0.242226230|0.231295958|0.207181466|0.224911049|0.240196356|0.239130865|0.196042382|  
0.056054287|0.112373773|0.079223555|0.078998656|0.142441995|0.079089478|0.057443575|  
0.599084200|0.655710882|0.652001061|0.658168319|0.714257707|0.704981948|0.607397257|  
0.170550021|0.143489177|0.160068192|0.212232624|0.198457897|0.180825058|0.133316152|  
0.491507855|0.546303611|0.525370068|0.554245870|0.597213567|0.599930908|0.497692012|  
0.384916551|0.407188178|0.431612185|0.449184158|0.473596092|0.444927552|0.385177098|  
0.023664510|0.038414986|0.027997670|0.034126789|0.038563203|0.030099855|0.024254994|  
0.613947546|0.644043986|0.634937098|0.639170198|0.682599035|0.718632489|0.607633960|  
0.163899160|0.149404511|0.106591918|0.133839460|0.186636307|0.156751870|0.122528544|  
0.067950296|0.091203934|0.073470454|0.079355874|0.084486703|0.077549834|0.063036019|  
0.031584296|0.046626950|0.030521399|0.030099942|0.058399728|0.028627324|0.024178806|  
0.870102922|0.927562130|0.945373562|0.918227684|0.925201529|0.920516825|0.941814550|  
0.033810047|0.061182203|0.040875329|0.050706875|0.065092650|0.056711505|0.039679194|  
0.027571519|0.037175656|0.039957622|0.024795780|0.032366542|0.029460413|0.025603194|  
0.912543332|0.926331799|0.929135415|0.936732423|0.922809794|0.935396025|0.903117049|  
0.883961241|0.851624022|0.847453589|0.877707593|0.881384650|0.887257215|0.891997360|  
0.888801406|0.921597688|0.886239024|0.930007276|0.934281093|0.906848860|0.874341815|  
0.796110931|0.821999174|0.824253481|0.870392051|0.848958572|0.824612958|0.795420518|  
0.059937960|0.044858810|0.046445653|0.047481088|0.048948420|0.049267170|0.044005463|  
0.026784180|0.031052514|0.028136694|0.026160995|0.039865528|0.030007230|0.024410437|  
0.485257846|0.583441320|0.510556191|0.564399293|0.584284542|0.542607561|0.490251030|  
0.481952514|0.543490194|0.575655008|0.553040381|0.655377571|0.617913211|0.499469613|  
0.040530909|0.058770546|0.045916190|0.055171120|0.054133369|0.037345171|0.040159547|  
0.408660218|0.497722588|0.396884965|0.457556974|0.463396356|0.480049969|0.399259923|  
0.030085724|0.031416756|0.037981170|0.039377509|0.039787664|0.044261819|0.030163894|  
0.077346762|0.079937914|0.062614654|0.085446502|0.087920755|0.082547160|0.066884002|  
0.433942655|0.454847363|0.419748822|0.535376286|0.583097739|0.550084464|0.423785463|  
0.026445534|0.043906108|0.025459340|0.039588771|0.035490706|0.035995960|0.026833493|  
0.049672191|0.066327223|0.083015955|0.076315961|0.065259137|0.075604810|0.057654765|  
0.290834643|0.311998363|0.287711499|0.374248494|0.325659667|0.376634222|0.284077055|  
0.875493622|0.909640253|0.895225444|0.921170739|0.931973817|0.921222027|0.882789065

0.039206387 0.088486527 0.090412868 0.078638211 0.083160962 0.066683412 0.051492129  
0.322172254 0.259231842 0.287270856 0.267367825 0.378852457 0.375571534 0.271053959  
0.034199136 0.032485484 0.034403192 0.032902346 0.038008316 0.030988710 0.028874238  
0.434518006 0.480915244 0.463992888 0.497428987 0.533669381 0.541469133 0.434669923  
0.032173864 0.047597838 0.038871370 0.041104630 0.050243081 0.040392751 0.032524547  
0.329947821 0.339571881 0.330572346 0.342604619 0.361480322 0.356163629 0.308066459  
0.342174765 0.357571976 0.273915563 0.327495556 0.363785537 0.486839193 0.303713577  
0.024974710 0.045363206 0.037626873 0.053061540 0.051992168 0.036925475 0.032444922  
0.125692657 0.115319572 0.138374792 0.152836296 0.143847182 0.108336120 0.110192188  
0.027548457 0.056613900 0.038636813 0.038098274 0.069358664 0.041219237 0.031458568  
0.032913356 0.031407309 0.029128581 0.030370738 0.041420970 0.037275459 0.028953685  
0.033396875 0.036464550 0.044021729 0.049615125 0.045038768 0.046958685 0.037441578  
0.088950496 0.159727330 0.110529564 0.102005378 0.122096534 0.075647489 0.086378674  
0.859448368 0.844892709 0.860896784 0.849646956 0.870441603 0.848439121 0.886971484  
0.065160268 0.061125449 0.040563625 0.052652550 0.074370997 0.064386179 0.047125769  
0.031143786 0.037215911 0.049545888 0.040721478 0.038922582 0.049666196 0.032029059  
0.963342074 0.952982390 0.960526135 0.955872423 0.953259122 0.950483397 0.965261227  
0.050438723 0.055103685 0.069400183 0.075951599 0.055037593 0.059920474 0.052262544  
0.042680718 0.057066987 0.033345944 0.061416305 0.058922635 0.047665013 0.034631329  
0.945924829 0.951883705 0.940577213 0.919992350 0.927988088 0.822935962 0.859333741  
0.037125099 0.036778519 0.041868793 0.039370738 0.034754107 0.038761237 0.029959868  
0.058920491 0.053865455 0.055331599 0.056730406 0.055354266 0.057858785 0.047985026  
0.905770909 0.871650780 0.908855456 0.910478071 0.867009449 0.911896760 0.923582374  
0.052876945 0.042268151 0.032701541 0.042412889 0.058523160 0.052786943 0.034943116  
0.674887291 0.669982431 0.636138035 0.704649753 0.682331676 0.677713687 0.591550891  
0.426580348 0.425460821 0.491855837 0.460410056 0.479721689 0.503785438 0.422843643  
0.034546857 0.026352373 0.031132044 0.035687627 0.029058657 0.040203914 0.026474252  
0.027175266 0.028803898 0.022913759 0.022052759 0.030396736 0.030483421 0.021521997  
0.417610846 0.452079803 0.446208223 0.556501265 0.491919236 0.545004488 0.419495846  
0.050254210 0.114824937 0.072818827 0.095130937 0.129039621 0.101853359 0.063483904  
0.064333700 0.057675375 0.054948712 0.061670084 0.071796271 0.072930311 0.054329253  
0.055036402 0.069981980 0.050057173 0.056602370 0.051389117 0.068980293 0.046488285  
0.047481558 0.057941969 0.061939174 0.052977399 0.088523701 0.050871977 0.043462701  
0.424245331 0.540409060 0.482672766 0.560882832 0.543305185 0.525280473 0.444111196  
0.024745837 0.033286080 0.024828849 0.024541467 0.024753340 0.025318965 0.021435567  
0.022781976 0.022307260 0.020123516 0.030344552 0.030201305 0.031985098 0.021728646  
0.814457578 0.884259469 0.879251605 0.882468337 0.889935875 0.880683896 0.822742458  
0.408130283 0.195988499 0.042227027 0.053354641 0.069281128 0.062947575 0.206712654  
0.019817599 0.037307488 0.032002894 0.030981602 0.028110044 0.038749421 0.025193116  
0.057610889 0.128015438 0.090775918 0.102433710 0.092392461 0.102920717 0.067569307  
0.057664307 0.064118353 0.060078843 0.070479488 0.092462668 0.081705014 0.056661042  
0.226408863 0.203665464 0.138777059 0.254163355 0.235066157 0.247070725 0.164075404  
0.519443675 0.427937723 0.647741018 0.325518101 0.574667164 0.446254395 0.613524724  
0.841140533 0.847600406 0.854315677 0.852811007 0.879837317 0.891714293 0.813339667

0.032644500|0.018525596|0.029335986|0.030304744|0.037379254|0.033914967|0.023270687|  
0.032849155|0.030180308|0.022415347|0.036675200|0.032596247|0.041204967|0.028132260|  
0.545427719|0.612531406|0.534890708|0.654627699|0.628426609|0.610558760|0.544410514|  
0.790745372|0.790270986|0.800644290|0.790397830|0.818861773|0.819379496|0.741626481|  
0.771279099|0.873660823|0.859915559|0.865222761|0.867505667|0.856990883|0.802918669|  
0.026276955|0.022987980|0.015707178|0.024144717|0.022153729|0.023809839|0.018494723|  
0.779789469|0.789249591|0.404366312|0.390581141|0.767073134|0.687647421|0.833568713|  
0.041990617|0.075934843|0.051438199|0.094323860|0.066480167|0.079319654|0.043251030|  
0.048816585|0.072934425|0.047634111|0.055490486|0.101911617|0.066668430|0.049915213|  
0.792927376|0.821593524|0.853725695|0.768166626|0.877383073|0.815196318|0.777542526|  
0.139599097|0.146182691|0.133940032|0.151640379|0.159487511|0.170060522|0.128689180|  
0.546574630|0.633119701|0.541356545|0.568406157|0.560753662|0.523997836|0.503823416|  
0.045943980|0.036061149|0.032116898|0.043162679|0.049851251|0.056983417|0.037307589|  
0.476435352|0.576709855|0.508772874|0.604449376|0.561434857|0.542626996|0.490574945|  
0.647526678|0.845739708|0.722756640|0.753784607|0.757260436|0.747414644|0.670140868|  
0.427261903|0.462320421|0.416088634|0.538298955|0.486105439|0.492799677|0.405699028|  
0.820769960|0.858277381|0.838510698|0.881367711|0.868863321|0.872879668|0.829888738|  
0.044379610|0.046898113|0.057859174|0.048173833|0.047126836|0.064569548|0.042162779|  
0.828670784|0.877743271|0.836546657|0.879979948|0.903019473|0.893333232|0.843612842|  
0.252270751|0.303779107|0.312255022|0.299728671|0.414081516|0.292172093|0.259667607|  
0.036830390|0.104425681|0.094016058|0.096088940|0.152123412|0.100622881|0.057880340|  
0.149352685|0.129691089|0.125860615|0.146689862|0.160860850|0.189013828|0.114127417|  
0.029250732|0.038439593|0.032544449|0.031053437|0.041809910|0.032699681|0.027168691|  
0.023702207|0.024819068|0.020248283|0.024025094|0.028067493|0.024269914|0.020512888|  
0.875374443|0.877167916|0.905256145|0.918156670|0.908883511|0.911628888|0.922588053|  
0.054454242|0.065217930|0.056694477|0.039498234|0.061894347|0.069954292|0.044348547|  
0.852573984|0.901355522|0.847005946|0.861928878|0.913430842|0.889568111|0.853379121|  
0.084069993|0.072954946|0.068212880|0.061636073|0.075810276|0.087417557|0.064014563|  
0.022756274|0.022962767|0.020225133|0.024469175|0.021751104|0.021520790|0.019411100|  
0.042489201|0.048046942|0.025244624|0.052960443|0.041220274|0.052765070|0.034186610|  
0.358376911|0.562433273|0.418504325|0.615249904|0.484434843|0.420826059|0.382756831|  
0.056915318|0.132820664|0.113903994|0.117275949|0.098639709|0.085761028|0.063447951|  
0.863597368|0.859538631|0.864987088|0.886507870|0.891569623|0.896995482|0.857299229|  
0.025016019|0.026659339|0.026400674|0.025288646|0.029205357|0.030465860|0.022544353|  
0.024173284|0.031338775|0.031406634|0.031224503|0.034201399|0.028459642|0.023547182|  
0.820135415|0.891429245|0.900665017|0.899538514|0.897835092|0.898351685|0.852268581|  
0.068085904|0.063934177|0.061453297|0.075233469|0.066833378|0.078515000|0.061157493|  
0.597388653|0.766698182|0.612038362|0.632653335|0.668829284|0.670649499|0.568237276|  
0.086290373|0.092001090|0.070550064|0.276522085|0.137780063|0.083786986|0.069928491|  
0.350880074|0.438434827|0.406557017|0.348096836|0.414524691|0.379977857|0.311548811|  
0.398396101|0.478642109|0.422263969|0.538267051|0.597513742|0.516400809|0.405776144|  
0.041661449|0.047881571|0.046818323|0.051669073|0.041326132|0.050817367|0.039537840|  
0.914968806|0.928416996|0.918119895|0.930758235|0.928970599|0.933746801|0.905472122|  
0.732637774|0.772564389|0.798356484|0.829988841|0.849362182|0.794702559|0.740720427|

0.863101202 0.924535650 0.919352894 0.930135149 0.944278291 0.886101244 0.880837372  
0.420165859 0.400124800 0.420618639 0.426035314 0.501606627 0.470084203 0.395736803  
0.029678789 0.023191783 0.020860623 0.029148000 0.030526458 0.030769653 0.023644003  
0.019691851 0.025836016 0.024424654 0.021209062 0.029991597 0.022977728 0.019332277  
0.293499224 0.389278670 0.355754406 0.384429601 0.356935958 0.328222849 0.280560376  
0.692799817 0.733412180 0.724429455 0.716150957 0.708550131 0.747276139 0.780991178  
0.402922012 0.452066257 0.381995792 0.398710830 0.462796836 0.437565599 0.369150225  
0.333356212 0.463139307 0.431018324 0.436854596 0.367142242 0.364486168 0.315509739  
0.775646341 0.859710872 0.830939802 0.873373062 0.911766548 0.847462389 0.796150583  
0.025821000 0.031878215 0.024535312 0.037572986 0.037393768 0.030666940 0.023320423  
0.513208564 0.603719861 0.605757148 0.611742362 0.649720087 0.620910558 0.540622650  
0.223688254 0.185902033 0.172706018 0.195818174 0.226239968 0.215423077 0.172854207  
0.046950090 0.051390787 0.064686486 0.061425485 0.090601771 0.053595135 0.045322031  
0.020915097 0.021952293 0.020398900 0.027036631 0.021521316 0.027236051 0.019530758  
0.033531344 0.033974165 0.025374351 0.029497385 0.037868689 0.030201298 0.024220929  
0.885724065 0.910257088 0.868202318 0.894377636 0.876776029 0.918889114 0.877473903  
0.054831177 0.051956155 0.056930144 0.054192447 0.060114117 0.054957227 0.047984521  
0.755033183 0.750516642 0.754602639 0.757939938 0.783783441 0.788706623 0.718800367  
0.068226166 0.177971353 0.143835850 0.165077726 0.166794969 0.183088638 0.098622807  
0.808970510 0.867588178 0.822489937 0.870980152 0.870548792 0.883882644 0.816527339  
0.225044257 0.194497651 0.186788251 0.205711246 0.298109905 0.255366636 0.190071473  
0.073084654 0.078187944 0.073621811 0.077810109 0.095622298 0.111718307 0.064974391  
0.511969511 0.634917709 0.549006743 0.634800849 0.653510113 0.598314088 0.523289479  
0.875028011 0.893593712 0.899847980 0.901751456 0.889959121 0.896928289 0.852384764  
0.074420706 0.141352328 0.108481754 0.101032641 0.111725297 0.086914125 0.075657040  
0.027544908 0.046671914 0.036768739 0.039798594 0.059313026 0.036002568 0.028692271  
0.085279497 0.063140258 0.056090199 0.067406137 0.077405020 0.063337808 0.052626934  
0.029456481 0.021946149 0.021822983 0.017958309 0.023777238 0.018443814 0.018051878  
0.240346723 0.216937456 0.204635136 0.217165691 0.252617604 0.254615911 0.207830192  
0.589654174 0.656340916 0.650555323 0.679156460 0.687592807 0.712242847 0.612471577  
0.430443665 0.533520036 0.532793644 0.574182089 0.577080437 0.510209169 0.458082614  
0.067934206 0.052487608 0.054412380 0.056521386 0.066423291 0.057902791 0.049350578  
0.776566309 0.836111627 0.821226999 0.830570520 0.852826070 0.847374972 0.776024162  
0.021699917 0.037170413 0.028181798 0.033726589 0.032833741 0.027083501 0.025123501  
0.823140740 0.820876381 0.797858498 0.819569331 0.863328524 0.834638115 0.783148039  
0.046821445 0.063082843 0.047970268 0.062806238 0.076060001 0.089159371 0.052851648  
0.038633512 0.046363037 0.046391859 0.049417432 0.066988077 0.062537336 0.042071591  
0.099841789 0.141668293 0.162819909 0.138436375 0.119853544 0.115816828 0.150692690  
0.060745307 0.049763337 0.050660630 0.057791145 0.048947107 0.057396538 0.046550067  
0.166731203 0.118858475 0.133605780 0.099929716 0.176843683 0.191154760 0.122973607  
0.540832875 0.546167426 0.550611451 0.600937243 0.580454238 0.602005764 0.510636046  
0.044326375 0.113935634 0.073267820 0.086461605 0.114624529 0.082578046 0.060325836  
0.134998007 0.137496785 0.116967427 0.129458180 0.194263119 0.151310128 0.124616932  
0.023193652 0.048239565 0.027698915 0.031309967 0.053005898 0.035445907 0.025449528

0.775833520;0.902610023;0.869909767;0.859823222;0.896246715;0.801278209;0.805660844;  
0.881412037;0.903537715;0.884042688;0.911024214;0.919703822;0.924956879;0.875640407;  
0.054237195;0.094331140;0.094155377;0.086543316;0.083764182;0.072012220;0.060324272;  
0.024522236;0.024070021;0.018551300;0.060105581;0.028459486;0.023680184;0.019392984;  
0.046818609;0.033219921;0.032700569;0.039851871;0.037686680;0.041533935;0.032344308;  
0.039981032;0.036527833;0.030357411;0.033331656;0.035705568;0.040753977;0.030404787;  
0.400492546;0.623980033;0.428479095;0.473418727;0.532184053;0.460695021;0.401672507;  
0.033323471;0.040989251;0.036855183;0.042081974;0.043311562;0.044072683;0.034722262;  
0.029462820;0.050351567;0.039333258;0.044451770;0.038242865;0.034705072;0.032264631;  
0.029728160;0.046941497;0.032381100;0.035612228;0.048219029;0.044644645;0.029889012;  
0.027371602;0.046013397;0.042140586;0.043386164;0.052721338;0.045681737;0.031578955;  
0.193446796;0.159320531;0.111811083;0.188718730;0.181646305;0.149165836;0.123881804;  
0.756335532;0.868777503;0.800675861;0.870036109;0.853020456;0.890792877;0.778691071;  
0.015991301;0.011692769;0.013546919;0.012938693;0.014199816;0.017687290;0.011391101;  
0.302307458;0.311975929;0.297298357;0.298831229;0.347488435;0.369982585;0.289601917;  
0.061148325;0.084680261;0.058017695;0.070217443;0.074209197;0.063609292;0.056404291;  
0.296201624;0.299314827;0.311605555;0.273699629;0.330547850;0.330577036;0.262835577;  
0.056812354;0.101925477;0.085921363;0.108328610;0.096764669;0.096400513;0.064829774;  
0.031633351;0.035663297;0.034562782;0.041888900;0.045424338;0.041618973;0.029856545;  
0.039856781;0.045319647;0.037869613;0.052315457;0.074619422;0.046343771;0.037298862;  
0.028432825;0.029580321;0.029074119;0.033855146;0.038275464;0.039326257;0.029508762;  
0.112035399;0.166432141;0.223175266;0.148671992;0.230131669;0.139445759;0.117940533;  
0.891780982;0.877531175;0.904833810;0.904268838;0.921450768;0.918433332;0.876469479;  
0.043418459;0.118406299;0.062691449;0.080157009;0.101875605;0.083820496;0.051798522;  
0.026516891;0.024763804;0.030434725;0.035919354;0.032551295;0.032916935;0.026527158;  
0.104124323;0.108537279;0.081134304;0.079820281;0.103471483;0.103289849;0.073908453;  
0.032510414;0.059747117;0.059243125;0.064181959;0.064174753;0.070281371;0.038311062;  
0.476595322;0.568529930;0.464160171;0.642179531;0.611536459;0.526134826;0.457997671;  
0.033015463;0.089866744;0.067656459;0.082266156;0.099555514;0.069331230;0.046843379;  
0.043587700;0.048894324;0.039662309;0.037990405;0.039483578;0.041816296;0.035499881;  
0.068332631;0.069450761;0.045120226;0.080571550;0.070383787;0.076794106;0.055815011;  
0.035783178;0.026509042;0.029812345;0.022939638;0.025990754;0.020822705;0.021636024;  
0.301525596;0.403372138;0.430280656;0.469228831;0.460044929;0.364036061;0.325170267;  
0.909239266;0.934951616;0.918693292;0.924363953;0.938789255;0.946887526;0.914575290;  
0.365838546;0.467836584;0.437746435;0.504880819;0.504745907;0.500822250;0.387000541;  
0.283264658;0.319341465;0.218889292;0.237730622;0.252606750;0.291397089;0.209468933;  
0.443759542;0.551469748;0.463673588;0.611522547;0.679344499;0.526405307;0.439182616;  
0.187825203;0.207279997;0.181491695;0.221261756;0.182615996;0.224648182;0.171851704;  
0.882648142;0.892877057;0.877971716;0.906260477;0.895765174;0.894321068;0.859782197;  
0.038857315;0.102003942;0.060310254;0.068743739;0.084265285;0.076307641;0.048356512;  
0.106309776;0.097932716;0.090192492;0.091711797;0.109545097;0.083538603;0.082172275;  
0.620489242;0.624601954;0.632884711;0.645542834;0.673575370;0.689537106;0.619559196;  
0.215116715;0.176036167;0.056366039;0.067088052;0.078645952;0.078534897;0.159780757;  
0.023566999;0.021607085;0.029213579;0.020627079;0.022169329;0.030217526;0.021229107;



0.593191568 0.581137756 0.554422083 0.554792708 0.548839862 0.571405515 0.510892809  
0.038607007 0.035908080 0.023007000 0.020397729 0.030768878 0.028072131 0.022925944  
0.038510892 0.026649615 0.032303330 0.042851540 0.038669467 0.044056095 0.028243558  
0.027624423 0.033172796 0.023381611 0.055063892 0.032271080 0.040135203 0.026306238  
0.065031803 0.072441512 0.064395005 0.077081216 0.088013621 0.077105978 0.063312402  
0.064456241 0.033512662 0.035061748 0.042115339 0.063280797 0.044777954 0.037400648  
0.016816533 0.018649502 0.016064686 0.019766749 0.019491327 0.021693683 0.015720100  
0.709214655 0.732187843 0.734715526 0.746166606 0.771058403 0.762706611 0.707007308  
0.027673807 0.033184069 0.055634256 0.032376570 0.037145288 0.038593064 0.028709325  
0.021423669 0.028177449 0.030283098 0.022840071 0.034032288 0.026816810 0.022354847  
0.209434539 0.253496643 0.172254963 0.159715571 0.276627330 0.295634214 0.179900105  
0.932999992 0.922452452 0.861791099 0.942137205 0.936767891 0.914572351 0.938396289  
0.039858148 0.094434820 0.058331820 0.062657565 0.099525776 0.054429367 0.046207492  
0.037069256 0.032113253 0.036207180 0.045758058 0.036165624 0.045578143 0.030247647  
0.783827050 0.886301844 0.855652937 0.864028321 0.860999785 0.850631529 0.790386516  
0.615429637 0.605952322 0.634533890 0.651086885 0.682406096 0.682183652 0.589639709  
0.039177825 0.040170586 0.049408004 0.065926104 0.057884574 0.061919759 0.039592089  
0.031031579 0.031164422 0.026211292 0.042401309 0.037365889 0.046778789 0.026054489  
0.044034690 0.054620080 0.055960395 0.055392472 0.070002481 0.070061671 0.046412252  
0.486159453 0.577865975 0.532238828 0.472739813 0.565684686 0.590542744 0.471633144  
0.104250349 0.188731264 0.151587397 0.235899267 0.270912482 0.167315018 0.130667398  
0.066959318 0.200675671 0.158295239 0.180189283 0.222932286 0.124521725 0.100292531  
0.035429381 0.035097318 0.064896839 0.107926760 0.051602844 0.087576086 0.036426615  
0.749884936 0.696667551 0.675951846 0.813657862 0.819913918 0.786556977 0.669939833  
0.040055989 0.129237086 0.081827662 0.071801214 0.085382004 0.078920339 0.054366111  
0.037685601 0.036931485 0.033284954 0.046633331 0.038294242 0.047992256 0.031694732  
0.885780584 0.908574130 0.880552942 0.909735605 0.927904953 0.934180544 0.878300878  
0.030405388 0.032500105 0.027393824 0.041669410 0.031228855 0.034915554 0.026552292  
0.024768970 0.032252152 0.032360534 0.035885078 0.031466342 0.031679845 0.026225802  
0.034547836 0.052561203 0.037323383 0.054919071 0.060398212 0.079839765 0.037009576  
0.016739432 0.014210870 0.012819871 0.012170567 0.016551020 0.017374166 0.012618919  
0.943674410 0.947891190 0.950527193 0.951375222 0.958450627 0.961164780 0.958102571  
0.631738839 0.784682626 0.698317882 0.795495612 0.845351649 0.705927540 0.650708983  
0.029876932 0.045767251 0.032879585 0.035234659 0.040568663 0.040597678 0.031065972  
0.068289135 0.095478845 0.067570304 0.061233149 0.083352327 0.048481167 0.057453032  
0.022679665 0.036488694 0.025838355 0.027222785 0.038412278 0.035152692 0.022694076  
0.039195460 0.037504421 0.052490270 0.053419364 0.049223600 0.049135806 0.038760425  
0.287481453 0.258299060 0.195274283 0.217374659 0.252009880 0.166932822 0.184671228  
0.022747484 0.026846167 0.021364365 0.023283463 0.031830861 0.021307742 0.020056905  
0.018694037 0.015988413 0.019158793 0.018174907 0.016564613 0.016865437 0.014648965  
0.488375368 0.663136540 0.592117172 0.631096010 0.647797452 0.570075182 0.529367825  
0.038629590 0.067916292 0.045761506 0.049926051 0.062309123 0.046631071 0.040880589  
0.187645188 0.189900222 0.149942239 0.209202904 0.213659870 0.219185374 0.168162319  
0.032065644 0.035251944 0.037531808 0.041838588 0.036022523 0.048036164 0.030980676

0.032865716|0.031909494|0.043433176|0.041369973|0.056748354|0.032455789|0.028769617|  
0.208023412|0.268185620|0.275108922|0.365873725|0.290233375|0.310512272|0.231284261|  
0.171447775|0.257936528|0.189519687|0.201926646|0.213360038|0.217104139|0.163955187|  
0.167082052|0.068793013|0.092141580|0.093836968|0.095487093|0.086469665|0.071755264|  
0.036577863|0.098529110|0.056343076|0.071290045|0.111733679|0.068487412|0.047428573|  
0.081437507|0.068955649|0.073747278|0.088277919|0.091197126|0.088850338|0.069346198|  
0.018987904|0.018784927|0.016826155|0.021051375|0.022794444|0.026748303|0.016384678|  
0.031598042|0.029042712|0.027708466|0.035007206|0.026671713|0.029052025|0.023123431|  
0.412019848|0.618125751|0.448648226|0.555144502|0.519680696|0.547264282|0.421526780|  
0.904699700|0.893084185|0.913443005|0.924427967|0.939755775|0.933404746|0.898067956|  
0.049652051|0.039069499|0.036930975|0.046172192|0.045985693|0.041472385|0.037810840|  
0.050394915|0.155417262|0.075826704|0.090582266|0.075702820|0.210442801|0.066244139|  
0.726573949|0.848315754|0.853592230|0.838431696|0.809784652|0.865770649|0.770873262|  
0.377209970|0.423750847|0.508324113|0.421458772|0.485752366|0.476402657|0.395366540|  
0.454791461|0.442826385|0.474668436|0.509643411|0.520802554|0.518181386|0.416176009|  
0.838552586|0.883803600|0.884638935|0.904431827|0.896851389|0.898427350|0.858465818|  
0.027928020|0.036565939|0.026860788|0.031003777|0.029243994|0.036171827|0.024263898|  
0.225845560|0.237447201|0.153526273|0.203230974|0.226136728|0.209148337|0.160253365|  
0.055044273|0.043506763|0.051135442|0.049376948|0.058746379|0.049523000|0.042529368|  
0.268444838|0.275901291|0.225365950|0.228200573|0.334280909|0.274702256|0.220980698|  
0.022482480|0.022979438|0.023962093|0.027360652|0.028797213|0.025429202|0.020982188|  
0.669149001|0.671708491|0.683947202|0.737709683|0.706191057|0.733149428|0.642149031|  
0.036067905|0.054293221|0.041428146|0.047250964|0.057886259|0.050101576|0.040458518|  
0.054711354|0.110750757|0.078494704|0.069712449|0.123042567|0.077107502|0.058066631|  
0.034814567|0.047751695|0.055959314|0.051419190|0.081846126|0.049122785|0.037512668|  
0.195001802|0.294794923|0.197995246|0.227814196|0.282055232|0.235038119|0.185813969|  
0.033492273|0.037601359|0.034363666|0.036637183|0.035378170|0.045788946|0.032628243|  
0.026398211|0.038299266|0.031140057|0.031859548|0.057601940|0.032365003|0.025541012|  
0.048420662|0.038561152|0.040963475|0.045073440|0.038304780|0.051517754|0.036241296|  
0.943672895|0.926488678|0.938271359|0.950843097|0.942149191|0.884298060|0.951121736|  
0.020299774|0.035410093|0.034554831|0.031962914|0.028793748|0.045919338|0.025081909|  
0.042728148|0.057381769|0.046465311|0.052850259|0.059793776|0.054938948|0.045797476|  
0.215113175|0.310944185|0.258607103|0.298529452|0.279750342|0.260043734|0.232796846|  
0.135516849|0.213189823|0.128203159|0.147202279|0.158523439|0.217222039|0.116333531|  
0.029045172|0.053578684|0.036195526|0.055630371|0.052848602|0.036115575|0.030824856|  
0.030111528|0.023310137|0.026796404|0.028133258|0.027031911|0.044809181|0.025026774|  
0.190605599|0.223266305|0.126751947|0.164138992|0.197356148|0.203021446|0.145559621|  
0.289710379|0.289595944|0.217255257|0.289261118|0.304653544|0.327382443|0.240615853|  
0.019935517|0.035790553|0.030627833|0.032015612|0.037211952|0.026565801|0.022548303|  
0.859760284|0.830640392|0.906199197|0.890147226|0.933937031|0.917588715|0.913282978|  
0.467581644|0.447195893|0.425301219|0.512405090|0.602916269|0.525067371|0.430364831|  
0.905219964|0.839851252|0.899190876|0.902729957|0.827152846|0.929357396|0.912562198|  
0.029574340|0.015832783|0.020272894|0.019556687|0.018873248|0.021290927|0.017222556|  
0.259107278|0.316668512|0.246259944|0.252397494|0.368353629|0.299409599|0.235735407|

0.026285556|0.017521610|0.016295667|0.018506735|0.023364194|0.019346350|0.016242784|  
0.021196558|0.025094063|0.016459626|0.017063807|0.028218135|0.020279091|0.018086975|  
0.049696734|0.127547119|0.065231274|0.076587935|0.095920780|0.070332489|0.055104478|  
0.026844159|0.035239866|0.030071758|0.027492082|0.032579222|0.030664784|0.026123469|  
0.066939761|0.088554974|0.067020296|0.063524595|0.068530175|0.066304262|0.056859528|  
0.025726687|0.027758830|0.019134358|0.028752755|0.029154539|0.026295182|0.022252541|  
0.812592162|0.908997416|0.863793157|0.856714573|0.880230904|0.802731811|0.810566543|  
0.061782261|0.056188840|0.039833572|0.052911220|0.054506382|0.068858981|0.045056843|  
0.028623747|0.019342093|0.018089603|0.022771060|0.021816507|0.020634508|0.018522130|  
0.662212556|0.654484566|0.643210151|0.640990872|0.638513866|0.639588436|0.602229159|  
0.382027391|0.435157158|0.433359257|0.443120721|0.568749990|0.486067866|0.425947246|  
0.745493202|0.838896963|0.815973939|0.811868316|0.838789494|0.833365991|0.766569768|  
0.567930190|0.648699547|0.624753672|0.558644113|0.631392399|0.652589173|0.551147302|  
0.417519696|0.506612648|0.473396095|0.484017377|0.552008034|0.513392684|0.437716974|  
0.035322314|0.028395374|0.024240779|0.032508039|0.038518868|0.029794011|0.025508546|  
0.026872968|0.027194765|0.017502934|0.025147273|0.031862754|0.028715077|0.021394435|  
0.811946421|0.904307564|0.881870785|0.862890860|0.919907103|0.851135027|0.841452548|  
0.028206693|0.026662990|0.025322360|0.028737417|0.025527399|0.027319629|0.023213976|  
0.022979375|0.027853830|0.021549542|0.027117178|0.024204765|0.027691878|0.023004136|  
0.038549070|0.026963313|0.024513568|0.027603383|0.028698189|0.031174117|0.040330069|  
0.078933641|0.070719467|0.061318294|0.077457084|0.085388294|0.092275726|0.066629072|  
0.632065154|0.786246364|0.810225430|0.828594734|0.808046977|0.772844142|0.720533048|  
0.033146030|0.045792992|0.028514965|0.035478432|0.034918741|0.026698351|0.028897227|  
0.034058019|0.066871537|0.035938091|0.081923540|0.061098748|0.048430465|0.034077380|  
0.025704116|0.031766845|0.034247271|0.034467203|0.031808506|0.028070602|0.026131891|  
0.417992190|0.480520763|0.473411989|0.510753736|0.560472257|0.547155259|0.431223022|  
0.094764274|0.076172844|0.069179227|0.080738857|0.084153045|0.084382970|0.072842810|  
0.828686096|0.922705277|0.909971032|0.921906885|0.929160676|0.929840327|0.880611745|  
0.038614035|0.078265455|0.049599327|0.050288926|0.069636897|0.051900167|0.042740477|  
0.856602743|0.874225279|0.866467503|0.849029017|0.916928897|0.906702423|0.840523145|  
0.056752249|0.058320547|0.076431004|0.073750007|0.084124197|0.065666331|0.055907493|  
0.028201874|0.028250304|0.043291677|0.046784564|0.035050442|0.044096832|0.028408639|  
0.021636511|0.028569577|0.037439538|0.033471134|0.038165381|0.030067006|0.025051144|  
0.173331538|0.123184935|0.134254492|0.192108093|0.106890042|0.143836991|0.196183137|  
0.415042248|0.456874265|0.430937871|0.463529958|0.481065417|0.473558249|0.414471895|  
0.041163442|0.050950625|0.045389062|0.051508950|0.081509221|0.046733570|0.041990290|  
0.230942774|0.188870189|0.163025783|0.192600407|0.234357437|0.251577754|0.174727230|  
0.280694669|0.392163937|0.260534684|0.269236085|0.319105140|0.339375536|0.258607377|  
0.038399260|0.028052204|0.039456846|0.049717324|0.042087833|0.043713784|0.033594307|  
0.397646329|0.406154957|0.393171039|0.379593390|0.436505960|0.427661406|0.366454798|  
0.119878198|0.124204753|0.123371291|0.134595423|0.164495850|0.154122726|0.112662421|  
0.060634810|0.050560103|0.041777126|0.056843751|0.080159800|0.054108552|0.046941367|  
0.697082553|0.712463917|0.694744127|0.777574432|0.802740002|0.771151353|0.687733337|  
0.866303104|0.891435708|0.903029155|0.870914919|0.888288066|0.910274929|0.866956445|

0.337885628|0.392212115|0.295839895|0.541472125|0.576841223|0.486593205|0.316073049|  
0.466793541|0.467488105|0.443888944|0.503856812|0.572052508|0.539658232|0.438478660|  
0.040292655|0.056744075|0.047086751|0.054932570|0.058899835|0.061241861|0.042266615|  
0.081436701|0.086134299|0.066222330|0.104797124|0.140312114|0.081301591|0.068013571|  
0.229279483|0.270122892|0.212458562|0.262147943|0.284282809|0.285242240|0.214040499|  
0.958010391|0.950743281|0.962990348|0.964541428|0.971901295|0.967531445|0.971211823|  
0.738901827|0.907544449|0.893598892|0.864406594|0.903621396|0.839020102|0.788547294|  
0.566336096|0.651897857|0.641677218|0.650978456|0.682021305|0.734679387|0.586935705|  
0.050582676|0.145226054|0.110785228|0.116301595|0.121629202|0.113227637|0.072586739|  
0.048315355|0.051908916|0.056664040|0.061728162|0.050634924|0.068061805|0.049642216|  
0.120841129|0.159000450|0.144241613|0.130485976|0.167661753|0.153700340|0.119002043|  
0.028422344|0.046990580|0.030139413|0.033323356|0.047164340|0.032358037|0.027862695|  
0.035780029|0.055652150|0.051379728|0.044013000|0.081149441|0.064159824|0.040977189|  
0.147615711|0.128489156|0.135382920|0.173464591|0.165621976|0.137793124|0.121615486|  
0.024466447|0.049421558|0.034812136|0.031629882|0.037909588|0.040891028|0.027740157|  
0.047654391|0.067118747|0.044892619|0.061498040|0.081665423|0.102369311|0.050109151|  
0.019495587|0.020243901|0.021920938|0.021150310|0.028505390|0.038973790|0.019924533|  
0.096265567|0.118255081|0.089436739|0.095184146|0.129048577|0.098957190|0.086321255|  
0.241517936|0.154875969|0.063999336|0.055900930|0.071685084|0.072659078|0.147192792|  
0.432889959|0.453718379|0.414856823|0.401710210|0.468503984|0.429290199|0.393579955|  
0.041010978|0.039983976|0.040973903|0.061186321|0.050021174|0.068882526|0.039020342|  
0.339975685|0.378709478|0.377629670|0.390307586|0.409146005|0.436755128|0.350254551|  
0.037354726|0.024806042|0.022706709|0.030495191|0.035979065|0.027692906|0.026485151|  
0.070369086|0.076742258|0.056417866|0.067807559|0.083285952|0.063306680|0.058095681|  
0.589835487|0.730556358|0.645561285|0.699627595|0.746791441|0.619778653|0.618206234|  
0.102149863|0.139353931|0.085000736|0.099885301|0.101497897|0.110196935|0.084600238|  
0.565236952|0.647815388|0.631674286|0.696768179|0.736324440|0.709203437|0.601155980|  
0.629755916|0.713897453|0.682880017|0.750550460|0.711093120|0.729216995|0.620089801|  
0.708343062|0.765527487|0.748527187|0.795740193|0.774006723|0.793075806|0.703148206|  
0.033106340|0.063673859|0.056376606|0.048410438|0.070324786|0.050020389|0.036977815|  
0.050588548|0.043114919|0.049916457|0.066052318|0.072066558|0.055487433|0.044218831|  
0.036854931|0.046448823|0.054641844|0.046421205|0.037407105|0.036437434|0.038211810|  
0.023029685|0.021147393|0.023817964|0.023868454|0.024003447|0.030278326|0.019427316|  
0.073868574|0.052829569|0.047351286|0.075732263|0.074672925|0.061430211|0.051635720|  
0.020443492|0.018243843|0.021089767|0.020900792|0.026380957|0.024484673|0.018932005|  
0.053868467|0.076453361|0.063122828|0.063228332|0.108395713|0.065433539|0.050969172|  
0.041147308|0.048592106|0.074231311|0.067619466|0.060599690|0.080101154|0.045713924|  
0.022930363|0.030413727|0.029536014|0.028065472|0.040887822|0.031819291|0.023328684|  
0.061315029|0.067006972|0.057299227|0.082312999|0.074382194|0.073692264|0.058695732|  
0.032310355|0.020584097|0.032070320|0.030595330|0.034212191|0.028355092|0.024130172|  
0.056446593|0.044633630|0.039766519|0.049597720|0.036124909|0.069956669|0.045535375|  
0.099179062|0.102949218|0.055777144|0.084468904|0.094359310|0.057188421|0.066738229|  
0.026339766|0.027074875|0.020186305|0.027999684|0.028473025|0.026611167|0.022880244|  
0.892341155|0.903200132|0.912709087|0.923638841|0.931211610|0.922584791|0.889653146|

0.052106812|0.056332529|0.051154414|0.056989223|0.053839585|0.058796500|0.048923871|  
0.551013300|0.573633595|0.526901897|0.545582348|0.607500526|0.615472777|0.532787890|  
0.058212173|0.063897659|0.048016159|0.062394671|0.067123676|0.063631586|0.049650926|  
0.051105051|0.047758916|0.053550123|0.058104450|0.060262426|0.062121073|0.047019322|  
0.589005881|0.672076399|0.591465062|0.594763403|0.627193334|0.652055009|0.562648223|  
0.173911477|0.246614329|0.113451350|0.174648634|0.184912179|0.231469785|0.113804478|  
0.659931937|0.706630951|0.683516930|0.699960617|0.752951042|0.751632015|0.669103059|  
0.024727084|0.042000600|0.030799508|0.038622320|0.036536335|0.046752703|0.026256566|  
0.347362232|0.319462629|0.363275701|0.303496704|0.344302222|0.356247144|0.295351361|  
0.035627495|0.041391537|0.051327890|0.047003857|0.055733883|0.069692161|0.040441534|  
0.150041257|0.178219397|0.138771144|0.152353289|0.192207670|0.169219113|0.146744944|  
0.068716297|0.122936141|0.090957820|0.064393938|0.099250449|0.071429207|0.062246085|  
0.382281550|0.519319624|0.459182573|0.434814930|0.464862060|0.415791637|0.376588882|  
0.837943804|0.869255504|0.845359113|0.860718330|0.892760634|0.861655857|0.833131408|  
0.042689529|0.047170275|0.037220204|0.039607792|0.036837104|0.034709716|0.034016709|  
0.045570530|0.107348082|0.068366471|0.114888799|0.094416921|0.087355578|0.063823312|  
0.087975931|0.110386764|0.087924560|0.118497231|0.113575727|0.107517239|0.085343570|  
0.872620472|0.901725204|0.899405088|0.906601201|0.918117239|0.924758985|0.886008322|  
0.370255291|0.393000425|0.404409316|0.423637294|0.380197029|0.363579620|0.357624396|  
0.022155824|0.023903992|0.025517447|0.027981124|0.035530526|0.021761146|0.019916608|  
0.098308838|0.210939044|0.128203240|0.159181054|0.232382087|0.158942107|0.120268114|  
0.060715341|0.047212498|0.063031145|0.066808007|0.053083110|0.067689873|0.051026465|  
0.043365961|0.022882210|0.027576633|0.049551276|0.033899335|0.035207786|0.028626225|  
0.048650249|0.053091351|0.042418478|0.056163011|0.039172989|0.050746355|0.040319659|  
0.091648508|0.071818931|0.073005875|0.083905385|0.076709475|0.076495640|0.066876419|  
0.036494309|0.028754988|0.040320694|0.043947086|0.028938392|0.035329959|0.027931629|  
0.067880289|0.070499627|0.048884208|0.084860841|0.066094374|0.070283661|0.050604943|  
0.442548371|0.551883180|0.481515732|0.520610012|0.597781005|0.551362613|0.457818235|  
0.034978576|0.056752100|0.048961838|0.042250354|0.083694017|0.066081843|0.039290665|  
0.034321054|0.034089255|0.029354932|0.046210822|0.041697864|0.029525342|0.030171126|  
0.169038957|0.135443170|0.154892241|0.170508897|0.226296976|0.272252245|0.136299224|  
0.040916608|0.051140443|0.042615175|0.075295289|0.055890108|0.068284525|0.045618357|  
0.573943820|0.575839032|0.641921000|0.540650159|0.603279823|0.607782706|0.550082048|  
0.036451942|0.047322491|0.030509065|0.034388298|0.039305449|0.028172028|0.028047170|  
0.038906704|0.039730311|0.031270264|0.041244648|0.046192082|0.038662543|0.031271633|  
0.808842161|0.585065582|0.763550756|0.535554458|0.610571390|0.718206695|0.755712358|  
0.402867039|0.460032866|0.416996494|0.451516101|0.498151873|0.485287527|0.404217130|  
0.024261288|0.037791091|0.027915436|0.033110955|0.037367097|0.036384467|0.026462384|  
0.036185067|0.025877865|0.025999473|0.037524369|0.037448992|0.034827131|0.027893168|  
0.666064212|0.777686737|0.758525714|0.830233152|0.795964937|0.770585569|0.724088437|  
0.081988396|0.084301119|0.051460975|0.066171463|0.060626973|0.079316052|0.060252306|  
0.053524271|0.076098298|0.052780600|0.057735933|0.071402230|0.054895713|0.043524013|  
0.183015013|0.161549758|0.098642470|0.091656265|0.110238240|0.127888892|0.083218292|  
0.029467173|0.031206828|0.032610037|0.040083303|0.039298914|0.042473217|0.029128686|

0.034540887;0.041370972;0.031759488;0.043024250;0.058773118;0.044344957;0.034345614;  
0.423107659;0.635819284;0.543350965;0.584828296;0.519883386;0.479699739;0.449094487;  
0.021248997;0.020441472;0.027987960;0.029612280;0.026101393;0.023782324;0.022672075;  
0.032855544;0.041515631;0.046778669;0.048585264;0.043002670;0.045036602;0.035278777;  
0.187080083;0.187502053;0.155845264;0.174383954;0.219384391;0.215783110;0.170100359;  
0.056098578;0.024871247;0.028597596;0.024372314;0.161111513;0.023382038;0.122287406;  
0.185570569;0.245834128;0.173519897;0.218619680;0.304187075;0.187560135;0.176966492;  
0.030185992;0.023771261;0.023413759;0.023580071;0.025405770;0.017614392;0.018933424;  
0.710715694;0.860632825;0.779222094;0.905588206;0.880079133;0.837535864;0.759748260;  
0.032388768;0.025862181;0.026496956;0.023710190;0.033555016;0.029285656;0.022805447;  
0.217221697;0.175027169;0.179036624;0.192838687;0.256615486;0.227131573;0.177108270;  
0.018660872;0.026647405;0.021393418;0.022637448;0.025661498;0.025955635;0.021114749;  
0.028662994;0.038320139;0.030156050;0.036011323;0.036211179;0.036984153;0.027193482;  
0.048320426;0.061134448;0.041611008;0.045481694;0.062720149;0.044983968;0.041140650;  
0.084101250;0.283295286;0.118219495;0.088311174;0.289266414;0.207458090;0.115094601;  
0.022126105;0.031481653;0.023983740;0.029055729;0.034641512;0.021863943;0.022645193;  
0.864400575;0.887961195;0.850824995;0.890233804;0.914085254;0.913833925;0.858547373;  
0.068704549;0.127065187;0.126965040;0.126987692;0.137661944;0.138633177;0.084201386;  
0.157875500;0.132094456;0.134666725;0.224835256;0.133712134;0.150258835;0.120631698;  
0.918664429;0.935462832;0.933054339;0.946507520;0.948800932;0.964001858;0.951723524;  
0.023084674;0.024580009;0.021204211;0.037717782;0.024450722;0.027174424;0.022335805;  
0.063530639;0.166115472;0.132402770;0.124976978;0.123830540;0.090561136;0.077032272;  
0.041960605;0.069412924;0.052180693;0.053059141;0.062968244;0.067575030;0.045150952;  
0.066748841;0.064234852;0.061136907;0.061004313;0.071016205;0.062461692;0.054987628;  
0.036911629;0.051104500;0.039968702;0.030824654;0.044834515;0.044596871;0.033740124;  
0.028593972;0.040552439;0.036382794;0.052062301;0.046535282;0.047445172;0.034825717;  
0.036718368;0.036180427;0.055610221;0.044020187;0.052565445;0.048030592;0.035309796;  
0.306524383;0.333471017;0.268907911;0.272828604;0.379014683;0.329881878;0.260827058;  
0.586886583;0.661335081;0.651254585;0.670835640;0.678000048;0.652453416;0.588399069;  
0.030740778;0.031607110;0.025999349;0.025388217;0.024841077;0.020118308;0.022617206;  
0.065545351;0.134086795;0.104820532;0.121972370;0.131365296;0.119277183;0.077499883;  
0.031624190;0.033631821;0.033377835;0.030066075;0.031111103;0.038667604;0.029850794;  
0.928693514;0.881414469;0.934747226;0.927895255;0.923818217;0.947574661;0.947593929;  
0.052354532;0.057852233;0.044047211;0.058680381;0.063806274;0.054155868;0.043098131;  
0.045276583;0.045633160;0.038013664;0.045337303;0.045639268;0.060007601;0.038472689;  
0.033310898;0.051943349;0.049425032;0.056823587;0.051503278;0.054794184;0.039570601;  
0.148780973;0.145474235;0.137796589;0.151476266;0.157825606;0.165355288;0.130503993;  
0.720148921;0.756356809;0.789081050;0.815462224;0.822088874;0.803129418;0.750819553;  
0.789574773;0.844247732;0.825096386;0.848074874;0.849725264;0.875332233;0.802382588;  
0.063112213;0.115726293;0.059079635;0.088571783;0.160682798;0.104368243;0.069589617;  
0.626654152;0.818702504;0.693691436;0.742573227;0.803098123;0.840398772;0.694074897;  
0.339802937;0.318237576;0.333136559;0.364963577;0.400505756;0.368478415;0.309158646;  
0.054331841;0.048050921;0.055806725;0.060437757;0.055592122;0.060241585;0.047862080;  
0.087186376;0.182404223;0.136325029;0.186714865;0.200937299;0.143050591;0.105312012;

0.034277610|0.076733605|0.062061414|0.051485048|0.066127438|0.071566288|0.042821022|  
0.041311018|0.066107699|0.067039531|0.062515148|0.065580624|0.061545451|0.046091418|  
0.052931006|0.054622540|0.058937890|0.071327626|0.061235246|0.058003004|0.051675222|  
0.273037267|0.298132597|0.281350871|0.317551503|0.349867572|0.344783054|0.276830989|  
0.034983283|0.045039387|0.042866658|0.034716593|0.051426946|0.045724760|0.035096441|  
0.027064568|0.018167929|0.023035496|0.022853265|0.027735104|0.030973459|0.021763948|  
0.504186675|0.583903214|0.514174279|0.591678149|0.596169374|0.567872176|0.491595726|  
0.755806665|0.814438279|0.820787045|0.799741312|0.830088735|0.783809467|0.745433999|  
0.078497574|0.068786518|0.055022532|0.045013212|0.066199262|0.047874643|0.050482631|  
0.047572836|0.075459273|0.044550056|0.051214908|0.145660456|0.059754704|0.044080230|  
0.813924497|0.826984628|0.799155758|0.835110909|0.905362985|0.831874461|0.797710986|  
0.046683305|0.066520708|0.041367256|0.058230505|0.057101906|0.056667152|0.039743213|  
0.053757304|0.040487873|0.044447709|0.060387972|0.055597785|0.044343245|0.040609374|  
0.058077565|0.082762903|0.071248412|0.063438751|0.067403757|0.063551046|0.057379275|  
0.672748828|0.638822654|0.633275967|0.795254868|0.742897491|0.766899860|0.767389069|  
0.065960328|0.145688713|0.107316653|0.101547453|0.122471757|0.115784340|0.087012435|  
0.494635106|0.597686053|0.576334467|0.549030685|0.644610426|0.611974676|0.528929207|  
0.099215034|0.150296655|0.136494159|0.121239369|0.146909981|0.111472119|0.099812266|  
0.096393142|0.127117524|0.101135770|0.102351448|0.096097237|0.144028893|0.086509576|  
0.340046240|0.360311775|0.397176943|0.304357447|0.537250503|0.446389758|0.328302296|  
0.032324466|0.027789311|0.028830828|0.025809330|0.024349541|0.047479175|0.024612274|  
0.064331562|0.059019215|0.063013175|0.084804294|0.061871352|0.071439016|0.052840709|  
0.633878935|0.669273230|0.603137021|0.632517963|0.720926458|0.708769786|0.604080895|  
0.888311635|0.897201497|0.892004165|0.894153013|0.914573780|0.915225140|0.875530552|  
0.692206364|0.762753051|0.739952809|0.765896896|0.782290633|0.729210164|0.691282044|  
0.156182022|0.099872883|0.118494152|0.107898106|0.131277642|0.145307819|0.105384619|  
0.420143331|0.537171096|0.483553989|0.567915287|0.572105683|0.526972788|0.459184355|  
0.359492238|0.476863899|0.421679093|0.540821817|0.579552100|0.458874512|0.391007710|  
0.034390219|0.021349602|0.050899019|0.039666107|0.036591567|0.036840726|0.029807165|  
0.448788292|0.558757001|0.493132842|0.529743769|0.590690125|0.577398435|0.501773273|  
0.035673331|0.025131653|0.030983465|0.040142090|0.032865096|0.037235387|0.026316820|  
0.062409072|0.078832245|0.069864952|0.104490795|0.087615987|0.106808382|0.068545338|  
0.064860047|0.058866907|0.051001753|0.054733640|0.067214713|0.052063863|0.046603598|  
0.037733015|0.056517195|0.034820959|0.042307403|0.062269645|0.057211898|0.039114765|  
0.078446187|0.073961626|0.059026525|0.086662667|0.095693177|0.086397023|0.068663138|  
0.185996221|0.196054034|0.174297918|0.231921370|0.243950050|0.231404324|0.175148291|  
0.030384595|0.032898039|0.031206630|0.036371417|0.044630756|0.036114704|0.030012818|  
0.054714195|0.045532851|0.060962007|0.067216352|0.051619473|0.071498867|0.050330668|  
0.578421287|0.638500774|0.595420488|0.666727291|0.659827370|0.680165438|0.571723572|  
0.215803065|0.347262893|0.291226503|0.266184170|0.366781849|0.304281706|0.238892521|  
0.030183698|0.037754293|0.043162693|0.040258119|0.049273751|0.042581145|0.034201018|  
0.349823453|0.424915352|0.341223406|0.352260113|0.413276617|0.385577926|0.315970070|  
0.034742633|0.044826513|0.031261674|0.040605506|0.054748981|0.032909653|0.029021169|  
0.023934368|0.036383242|0.038106523|0.033114294|0.053146045|0.038834628|0.029398102|

0.046831638:0.036768320:0.033960275:0.040869523:0.041571206:0.041035777:0.033135509:  
0.037333584:0.053371911:0.040055934:0.055272827:0.108883398:0.061146434:0.039224317:  
0.529925686:0.546763928:0.590919772:0.490627991:0.601713657:0.549058158:0.502971885:  
0.842205174:0.828968015:0.845057963:0.860712827:0.872659647:0.869177630:0.834639219:  
0.451112454:0.522485084:0.484437152:0.533021486:0.551838368:0.538170644:0.441956620:  
0.020274041:0.061610766:0.037704596:0.055219780:0.070187072:0.039722327:0.034089082:  
0.053423511:0.040220549:0.047220843:0.059821413:0.057429892:0.051447966:0.044461164:  
0.539511051:0.511915766:0.572917743:0.639689754:0.661724599:0.591315155:0.526227214:  
0.050514519:0.099624510:0.063260819:0.070682693:0.092703631:0.052611758:0.050535216:  
0.108764707:0.253654572:0.123127881:0.155165262:0.229521860:0.172118537:0.112602064:  
0.431308230:0.527246201:0.575865412:0.455231421:0.602384711:0.515744451:0.433458822:  
0.059855018:0.085375507:0.071114628:0.072635744:0.068709685:0.059244295:0.058500108:  
0.083086909:0.074071320:0.079372864:0.075765814:0.070044440:0.093426485:0.070775702:  
0.033836045:0.051306326:0.050883426:0.043336336:0.049874734:0.048887541:0.038533293:  
0.066220842:0.100358057:0.086371484:0.108798504:0.115324475:0.109411485:0.078443813:  
0.035469613:0.026892292:0.034381398:0.032882021:0.031691033:0.041116354:0.028912891:  
0.265923509:0.260736889:0.233836949:0.260125863:0.313078964:0.334845672:0.243603616:  
0.341144715:0.406204338:0.246577386:0.335929079:0.367363510:0.394166936:0.285648976:  
0.132726833:0.146968903:0.125293695:0.151791014:0.184802806:0.190261716:0.128968570:  
0.024340618:0.042983092:0.024971280:0.031691231:0.031632144:0.026601041:0.022656165:  
0.046324163:0.050409302:0.046009320:0.057264615:0.057501440:0.054904356:0.046349811:  
0.828815413:0.888229438:0.869307113:0.936674395:0.903425483:0.893856751:0.855786519:  
0.028667002:0.049825110:0.032633504:0.029919107:0.037541848:0.026476682:0.027641279:  
0.866784382:0.910646169:0.896950265:0.910805342:0.875636698:0.881222045:0.867205404:  
0.173452494:0.165674502:0.139094280:0.171600562:0.181647933:0.208257543:0.148897180:  
0.884502695:0.897529650:0.864050182:0.922830588:0.933133489:0.923265816:0.868066594:  
0.075827585:0.045855791:0.144225429:0.074300460:0.051128975:0.061914829:0.050398396:  
0.543305906:0.651881002:0.603635780:0.652157856:0.648807671:0.632560261:0.578759655:  
0.020778681:0.016612273:0.018196144:0.023255324:0.018231314:0.020562401:0.017006749:  
0.023340386:0.033334494:0.021857856:0.024855898:0.027805851:0.021147158:0.020036471:  
0.736681357:0.800801180:0.762483703:0.845980964:0.841169326:0.740397259:0.722044363:  
0.826938795:0.829633066:0.836037683:0.845834569:0.865457990:0.891308719:0.828284058:  
0.043495054:0.035016639:0.052838361:0.040534495:0.054672121:0.035861105:0.035760100:  
0.880073513:0.872217268:0.876500681:0.902808425:0.901324486:0.908531628:0.868399398:  
0.049495166:0.057879704:0.044018362:0.041724247:0.046791204:0.039535057:0.039897270:  
0.030968981:0.069595448:0.047067134:0.034968436:0.040564627:0.037397272:0.029992424:  
0.026766706:0.028926118:0.036443434:0.045974606:0.035510093:0.036002204:0.026101653:  
0.029313227:0.025505316:0.029128123:0.027580309:0.035545760:0.029969311:0.022533287:  
0.042272918:0.054261114:0.037581897:0.058776325:0.059282201:0.035240291:0.034008548:  
0.036571809:0.047469115:0.052654748:0.058243437:0.070747386:0.060838052:0.042810930:  
0.042132146:0.051065419:0.045170417:0.047377744:0.050212456:0.062731906:0.041087346:  
0.479787824:0.566505327:0.500403361:0.519740482:0.608358567:0.573066748:0.483192710:  
0.803821471:0.793000575:0.854267873:0.872175564:0.876725144:0.867787011:0.867504216:  
0.728301271:0.729034172:0.760291932:0.736557832:0.804260321:0.819538056:0.720058614:



0.243343132 0.262994382 0.237522333 0.220644859 0.298730421 0.288010084 0.210227276  
0.190904850 0.222548299 0.161960403 0.193549052 0.183391340 0.210853421 0.126018178  
0.184023496 0.181734959 0.110055029 0.136750074 0.134500398 0.124029610 0.106131879  
0.659615375 0.844398482 0.792936444 0.801064574 0.848808650 0.752768716 0.718574406  
0.751742432 0.824319367 0.755457480 0.785824462 0.828660668 0.840901397 0.754537319  
0.281688305 0.226571591 0.258325768 0.318358533 0.383259554 0.305681943 0.221851628  
0.089960750 0.099615377 0.075065117 0.062553148 0.096407982 0.093760614 0.068536752  
0.610543868 0.598083499 0.670541566 0.651058145 0.668025448 0.635745915 0.603024171  
0.460833800 0.618113691 0.507391864 0.570935883 0.645059931 0.577828891 0.501549588  
0.202846352 0.270882190 0.240268789 0.261561274 0.279692941 0.259332336 0.221318137  
0.530997918 0.474821082 0.405175741 0.473662509 0.530510725 0.317343287 0.317154593  
0.047641189 0.049740930 0.039170146 0.049919805 0.054074759 0.047102766 0.040798647  
0.943384640 0.972334231 0.964947689 0.963530141 0.974618948 0.971664509 0.954248722  
0.327283953 0.326921078 0.266037845 0.318610141 0.345397025 0.344817611 0.276894410  
0.029455136 0.025281331 0.025931063 0.035563211 0.033603924 0.024952042 0.024733937  
0.464458117 0.700654854 0.629927534 0.568106818 0.594481856 0.581546959 0.509615502  
0.030810210 0.048185513 0.071324852 0.076777162 0.051977051 0.049884365 0.113820119  
0.034914528 0.046873754 0.054283473 0.039007867 0.043527976 0.047414822 0.034335819  
0.053293398 0.159700305 0.103043820 0.124847489 0.112833929 0.087928387 0.068023867  
0.643181654 0.732245900 0.770139058 0.708771444 0.793887908 0.746065076 0.642788926  
0.877144175 0.871839095 0.891646962 0.887110966 0.899146641 0.900806272 0.913441521  
0.077817195 0.070127429 0.068462690 0.079080798 0.117188536 0.081750373 0.068125395  
0.033554495 0.041302874 0.043227642 0.036810404 0.041652289 0.043813167 0.032329880  
0.048021275 0.054963633 0.047840258 0.061713265 0.059599311 0.062136574 0.049134373  
0.175075683 0.197591564 0.137247947 0.128057400 0.187705965 0.200048594 0.145702784  
0.590623588 0.729865818 0.730743568 0.726327257 0.745725329 0.697462795 0.657091881  
0.224013244 0.306996500 0.226637380 0.187846625 0.254428446 0.240820001 0.198545431  
0.570489440 0.660228060 0.608483502 0.596297644 0.680156205 0.660054193 0.583192545  
0.092822263 0.094254034 0.070279565 0.106535008 0.100352693 0.073205535 0.079957626  
0.047436097 0.048340365 0.054865831 0.049314124 0.045360491 0.054300683 0.045330634  
0.054198922 0.036581960 0.031671014 0.038145272 0.050136841 0.043067090 0.036451491  
0.291879889 0.267178244 0.284482016 0.252342186 0.293389188 0.307739364 0.254395799  
0.784408524 0.872225761 0.880783380 0.865855253 0.899253114 0.833688967 0.812713598  
0.125656049 0.102567053 0.108866234 0.104714272 0.117635666 0.117060338 0.098897972  
0.635368510 0.780627708 0.715150942 0.761288587 0.749185820 0.728035319 0.666264641  
0.018229861 0.026357624 0.023179811 0.033002751 0.028934922 0.028097750 0.022397561  
0.068012129 0.093489387 0.091455041 0.096111622 0.088232564 0.096917656 0.074717402  
0.052760032 0.063237970 0.057092384 0.052658741 0.077002096 0.066453319 0.050152179  
0.536546343 0.586261024 0.627300748 0.585366355 0.626596929 0.633947487 0.547168453  
0.029675961 0.025342965 0.022185044 0.038979288 0.029691564 0.023859401 0.022577626  
0.052487136 0.064622222 0.041294231 0.091396143 0.134433566 0.139002928 0.059987085  
0.106620746 0.227401313 0.175708530 0.159832114 0.250880551 0.126527883 0.116808580  
0.647043113 0.716113616 0.678438166 0.700056885 0.653994062 0.666298082 0.623139478  
0.078681815 0.073668686 0.068256219 0.066455057 0.073928552 0.089056223 0.065131642

0.658689217|0.754919875|0.701641456|0.739923778|0.724528409|0.670946275|0.644771626|  
0.429765110|0.629699749|0.478874317|0.627574394|0.634041315|0.577477460|0.467974320|  
0.692716120|0.811374916|0.742823095|0.820876380|0.855750662|0.816102976|0.735458444|  
0.045182213|0.034902879|0.039448848|0.052108544|0.057477517|0.049386679|0.039449326|  
0.042684044|0.048126657|0.040933358|0.035264123|0.044383216|0.029552098|0.033805602|  
0.661971835|0.779005274|0.748213266|0.765441513|0.833863542|0.743293195|0.695498034|  
0.125314608|0.248915503|0.154064169|0.296925507|0.146571518|0.158002223|0.132242757|  
0.312467842|0.370621812|0.283036701|0.407082958|0.364534641|0.339197568|0.308037958|  
0.178147698|0.108687974|0.244349197|0.103826031|0.095579688|0.169972248|0.216095715|  
0.060555386|0.055686003|0.059653681|0.075820163|0.086492628|0.089926071|0.053843433|  
0.050223089|0.036309457|0.028443672|0.048774063|0.049294675|0.046966971|0.035757930|  
0.024981630|0.023830705|0.030622575|0.030489337|0.027624112|0.026418857|0.023471385|  
0.078057178|0.124730620|0.110708970|0.110769833|0.091868500|0.098380346|0.077467417|  
0.022978356|0.041814248|0.040241070|0.032456538|0.042819767|0.035043406|0.030048674|  
0.128189845|0.131107466|0.121697134|0.146024516|0.157109738|0.117338973|0.115578842|  
0.218458964|0.270374450|0.127832780|0.157624852|0.184287973|0.236335339|0.112274375|  
0.032797145|0.024099644|0.027731851|0.026637932|0.038233477|0.031224185|0.026738739|  
0.026468959|0.022773805|0.062770978|0.026663125|0.032460725|0.047212110|0.024910889|  
0.824201808|0.838725462|0.830182582|0.847351398|0.878004430|0.863914718|0.807786509|  
0.901608720|0.906337023|0.911924111|0.915148801|0.926859081|0.927093231|0.890318029|  
0.085633492|0.058483128|0.056637975|0.065583445|0.064480805|0.059466591|0.055176185|  
0.162782256|0.172518704|0.207674147|0.220958482|0.339770499|0.250054532|0.177658790|  
0.055891867|0.026867644|0.037995734|0.044130216|0.055459467|0.053349840|0.037164115|  
0.042227246|0.056314055|0.059610951|0.071729972|0.060122680|0.054537777|0.041634888|  
0.054144080|0.078125643|0.070216210|0.075565724|0.089711770|0.077671793|0.062668021|  
0.045257807|0.082079717|0.064363308|0.069413109|0.084676183|0.076942368|0.052903819|  
0.018649130|0.027698091|0.020197055|0.025728776|0.031229238|0.022923873|0.020732971|  
0.074525197|0.067749516|0.053958974|0.058252490|0.062644802|0.085031074|0.056684838|  
0.031690619|0.039396153|0.034898057|0.035521547|0.036028022|0.027196406|0.029261739|  
0.034574586|0.037292380|0.043801413|0.038865448|0.030877795|0.033920430|0.028647434|  
0.655616852|0.783597001|0.701303465|0.690441309|0.750107189|0.717358364|0.672322298|  
0.035787184|0.035511593|0.050397073|0.044066371|0.043683966|0.045837963|0.037090900|  
0.031880328|0.031281779|0.032608258|0.031303664|0.033172968|0.030895933|0.029157615|  
0.073843271|0.155448940|0.078812482|0.076199965|0.124454798|0.116934345|0.082063088|  
0.023755679|0.028376109|0.021847140|0.022299845|0.021156841|0.018288883|0.020447315|  
0.028575234|0.032665783|0.032671475|0.038926990|0.034178957|0.040175458|0.029690331|  
0.122386489|0.112203441|0.100899105|0.122581159|0.116142304|0.137349087|0.102625105|  
0.280311936|0.302449036|0.270199230|0.300386114|0.361295444|0.340783831|0.280352896|  
0.027364463|0.039615174|0.044774604|0.041889159|0.049306701|0.043216693|0.035180364|  
0.077903290|0.117516042|0.088938588|0.108176773|0.132831452|0.116732976|0.094840099|  
0.051183734|0.042962278|0.030652103|0.062548537|0.042479413|0.047699351|0.036378625|  
0.847801881|0.847197534|0.864630381|0.879962658|0.887540132|0.902833352|0.832714903|  
0.054835559|0.040957699|0.049361727|0.054650832|0.048276916|0.043328058|0.040520246|  
0.264761287|0.150475450|0.437167452|0.162406546|0.237067828|0.475339980|0.407293896|

0.813286150!0.884300190!0.809444616!0.854335069!0.910226171!0.875813725!0.819499511!  
0.798819358!0.864399389!0.814562239!0.843405449!0.871207339!0.867075375!0.814402684!  
0.803284577!0.892264428!0.880768607!0.822375585!0.891648919!0.862593459!0.802440757!  
0.068488426!0.061038037!0.057521055!0.066586948!0.069855167!0.065757170!0.057787392!  
0.030291927!0.041383571!0.039556313!0.055256907!0.055409699!0.042074736!0.034514412!  
0.350715634!0.387908541!0.344124641!0.346964388!0.422447679!0.407670396!0.349058724!  
0.699911114!0.709486302!0.725161800!0.712068779!0.719687067!0.794690296!0.679769388!  
0.080120694!0.078409873!0.058773377!0.082389527!0.085940235!0.084277008!0.070967434!  
0.029526217!0.020109375!0.021780736!0.023527687!0.025704511!0.028484542!0.022600660!  
0.722762679!0.819740945!0.784715549!0.786287701!0.856637212!0.828943269!0.746820775!  
0.555845235!0.687766455!0.610525851!0.612402190!0.686825380!0.671990254!0.574706513!  
0.033125514!0.030331786!0.038202616!0.036508091!0.043998361!0.051621407!0.032072829!  
0.043817567!0.143421575!0.070334562!0.161851741!0.162496203!0.071326888!0.058663524!  
0.052103054!0.057797774!0.054003420!0.058976774!0.065792395!0.068077611!0.054231988!  
0.831859339!0.860457061!0.862010250!0.883334163!0.887129125!0.878971956!0.816970326!  
0.024951412!0.020549588!0.020677540!0.023225464!0.033410233!0.023800861!0.020706132!  
0.091458194!0.055207696!0.096576718!0.118011258!0.094886376!0.104399058!0.121023755!  
0.871485610!0.914449235!0.902120164!0.888338407!0.897003400!0.906899956!0.866790150!  
0.060924677!0.117637460!0.078123265!0.062452578!0.073174664!0.045725254!0.052265482!  
0.776725431!0.807952355!0.843905960!0.792821575!0.826739940!0.849325354!0.786718902!  
0.027205708!0.031802460!0.026728495!0.031587304!0.046171296!0.027743320!0.025597093!  
0.048922942!0.080426226!0.094825099!0.108900375!0.086986723!0.093732610!0.059870344!  
0.072935979!0.181613553!0.129140109!0.154874656!0.224304531!0.147032735!0.096621229!  
0.043238693!0.036306972!0.033046169!0.040933099!0.057924075!0.045809240!0.035405144!  
0.022364336!0.027006804!0.020944444!0.021562672!0.028134914!0.025696979!0.020468623!  
0.862943566!0.854568419!0.887118309!0.884553320!0.903973641!0.872035267!0.857212174!  
0.763476169!0.846455123!0.831100345!0.743263164!0.836263220!0.835593152!0.778391337!  
0.436693419!0.497378834!0.440594145!0.407192324!0.526444666!0.490771305!0.424133043!  
0.093836730!0.087471159!0.066655763!0.075487841!0.072583608!0.081556175!0.067567585!  
0.049421496!0.047893678!0.041475916!0.054707128!0.051877836!0.060424236!0.043187406!  
0.198008450!0.151393807!0.159843802!0.156894658!0.226097384!0.185008288!0.141033801!  
0.030334693!0.027473929!0.027095972!0.024091520!0.027469950!0.032038438!0.022758475!  
0.451808485!0.595547692!0.598139696!0.667195706!0.500602775!0.557556852!0.477317591!  
0.090862891!0.097821379!0.094017322!0.104390263!0.094892435!0.110889477!0.085966722!  
0.707021008!0.536098682!0.777133737!0.834885192!0.710593406!0.778596244!0.804887317!  
0.409241419!0.443118877!0.310200034!0.508507080!0.485075468!0.463927798!0.499146213!  
0.037077334!0.029082329!0.029676023!0.040597615!0.041000376!0.055163362!0.034795114!  
0.050411655!0.088015230!0.062729492!0.046008445!0.063986170!0.041061726!0.044680556!  
0.203992198!0.253582581!0.175842923!0.280003326!0.266291323!0.255957807!0.203197060!  
0.519918309!0.748991257!0.549789400!0.670416047!0.698450279!0.661306824!0.566565828!  
0.025233160!0.033169430!0.026793473!0.034459072!0.050512430!0.032943133!0.024306078!  
0.046988151!0.046968899!0.039170560!0.049468448!0.040987332!0.048556475!0.038449890!  
0.049356439!0.050404211!0.045453055!0.050336500!0.044577307!0.046513672!0.038866695!  
0.030684475!0.039231157!0.034186008!0.035766663!0.043567651!0.037273417!0.030588311!

0.023470977 0.031071155 0.022965320 0.027871853 0.031434961 0.034745516 0.025020333  
0.048279274 0.036251554 0.038908871 0.036868716 0.040945650 0.035288905 0.033859565  
0.016739094 0.021560423 0.019390253 0.024009649 0.027500172 0.019381036 0.017773749  
0.067738515 0.116365114 0.090301405 0.110125789 0.303226942 0.083840978 0.083392900  
0.716275858 0.833102675 0.825734394 0.900313530 0.857525725 0.843357971 0.724639532  
0.036455999 0.053318156 0.046642466 0.030346120 0.040424400 0.032242833 0.033398799  
0.506084463 0.646439086 0.513047969 0.532686869 0.604721870 0.573763130 0.491352409  
0.089986465 0.102874240 0.090849306 0.114418400 0.098360570 0.096870796 0.082029491  
0.083044839 0.080950034 0.072396121 0.076414124 0.090738209 0.083024286 0.070167680  
0.482333977 0.553824309 0.445394527 0.506915551 0.549532934 0.506630630 0.450989258  
0.543250342 0.628207725 0.613656264 0.632681606 0.638304676 0.660351320 0.562595987  
0.829028946 0.903051919 0.899270675 0.897548257 0.927136736 0.904683805 0.854531735  
0.330954502 0.382265953 0.282700835 0.279016030 0.348252035 0.349887289 0.272906762  
0.434292366 0.540942047 0.478128209 0.650768003 0.524897451 0.506377732 0.438639080  
0.577866459 0.621739415 0.646613453 0.706129754 0.617170817 0.693882485 0.584424601  
0.022569855 0.028201001 0.029985192 0.029233666 0.024997901 0.031168590 0.022998145  
0.026146196 0.036233742 0.031988790 0.029668671 0.040896654 0.032365337 0.028886833  
0.047966165 0.077606727 0.060360579 0.063650992 0.091621473 0.070067039 0.055975753  
0.055691006 0.070921107 0.054438969 0.071688194 0.064269104 0.069522603 0.055158405  
0.736775744 0.784083097 0.786722672 0.800773153 0.804716205 0.861069115 0.747525141  
0.026357304 0.024029023 0.022813127 0.030819984 0.028445545 0.031221241 0.024047471  
0.800530479 0.866764971 0.852942641 0.887082672 0.899257403 0.896653145 0.837395043  
0.041774122 0.032442734 0.027137114 0.046330529 0.046346817 0.046229023 0.030592039  
0.025357132 0.039004436 0.023810723 0.032190119 0.032647971 0.027384729 0.025352259  
0.043188212 0.036049580 0.032782191 0.053433368 0.048420052 0.061654350 0.037430574  
0.048804781 0.098779707 0.086982032 0.180590845 0.109810490 0.076271010 0.064830950  
0.020260427 0.034206268 0.033230598 0.037749834 0.041235298 0.036828768 0.026065258  
0.089890416 0.058700997 0.078410197 0.077607248 0.062772787 0.078650585 0.060505538  
0.048291943 0.072134611 0.057325218 0.067611955 0.057182323 0.063063967 0.043185149  
0.466346122 0.592604562 0.573412373 0.626373712 0.596706708 0.546926867 0.499242737  
0.871021577 0.880151124 0.883026067 0.910267967 0.887908705 0.912577343 0.873264350  
0.534844868 0.664090477 0.626671818 0.585794959 0.679896856 0.626176988 0.541545562  
0.447593191 0.486802275 0.470226356 0.535898879 0.542839961 0.562070621 0.451795583  
0.757651520 0.821846671 0.744243677 0.885272117 0.873812389 0.815405191 0.746786306  
0.856211390 0.911988434 0.884921429 0.883647764 0.909843227 0.874270328 0.839451099  
0.910975160 0.923792629 0.935319024 0.932386996 0.941887389 0.929504218 0.904674099  
0.443716036 0.504766692 0.446514635 0.656358036 0.500128768 0.496924758 0.415555140  
0.042729197 0.127418017 0.065253910 0.074797508 0.105343871 0.069552312 0.055475642  
0.335798766 0.569610194 0.393952616 0.583217792 0.518861635 0.429881757 0.384390766  
0.380423277 0.493920562 0.391094824 0.396723158 0.490726770 0.486447658 0.383030950  
0.280393908 0.427940592 0.299969637 0.386106195 0.398903611 0.373806231 0.285670174  
0.126394460 0.145109428 0.126829336 0.159712827 0.170059405 0.147254882 0.128471693  
0.815494290 0.851595234 0.855312558 0.878756879 0.882447205 0.898681679 0.832793618  
0.775250183 0.883098235 0.844748086 0.856087526 0.894481591 0.863901913 0.816329375

0.026672554|0.016541661|0.025783990|0.020278938|0.021327620|0.023288057|0.019277898|  
0.033140250|0.048013202|0.046344546|0.051637285|0.059425833|0.050544465|0.040534218|  
0.253086683|0.298495012|0.253086075|0.272636745|0.313439062|0.274624324|0.228451217|  
0.072327971|0.182002053|0.102020905|0.087374295|0.139630219|0.109981891|0.075739444|  
0.047813465|0.047542374|0.043319406|0.059532409|0.055552128|0.059221291|0.046866328|  
0.323138391|0.361035179|0.346679117|0.380641795|0.372222227|0.386982653|0.317396357|  
0.062330542|0.128838374|0.067278102|0.073668875|0.071102205|0.063890753|0.058956800|  
0.024356378|0.028809808|0.022164622|0.026237537|0.031145299|0.029460411|0.022233382|  
0.036227818|0.044292234|0.024828070|0.049489142|0.045222685|0.039766673|0.031834765|  
0.050654877|0.098092170|0.102213855|0.080491088|0.137269548|0.069355518|0.058784479|  
0.020237322|0.016782731|0.019851634|0.015965286|0.026479133|0.019629216|0.017165196|  
0.043072383|0.027083970|0.032988858|0.039338955|0.051162463|0.059296697|0.033142229|  
0.078997377|0.105875868|0.094500570|0.083370103|0.125942111|0.097473457|0.076297679|  
0.108269012|0.082327979|0.097411231|0.113597282|0.120537361|0.126534404|0.092295891|  
0.324633565|0.027709204|0.347752210|0.039646420|0.355472601|0.082011334|0.069165349|  
0.031397251|0.035840282|0.036621689|0.039145748|0.034424485|0.042132703|0.029920999|  
0.046002413|0.045860323|0.052341614|0.046042872|0.050058271|0.063497183|0.045235367|  
0.671296925|0.723623128|0.693374765|0.764466451|0.782950237|0.772985540|0.666524118|  
0.036044447|0.032657951|0.051041742|0.038022699|0.032422466|0.042028271|0.029959358|  
0.022921289|0.020061681|0.022064394|0.027136529|0.035511590|0.033790279|0.021891935|  
0.080540504|0.068064533|0.070550034|0.072978083|0.063412069|0.065106169|0.063817814|  
0.672609878|0.828450490|0.838510092|0.645463708|0.870314264|0.813054068|0.817624284|  
0.934369032|0.925326366|0.937224572|0.952867232|0.944357027|0.952359663|0.951790431|  
0.620252022|0.744484446|0.678407379|0.752416081|0.760145735|0.692620189|0.650586184|  
0.084191461|0.065721373|0.050499798|0.051442034|0.074241394|0.084220836|0.055437360|  
0.025303072|0.036237108|0.028865276|0.039597075|0.055402749|0.040738032|0.029540281|  
0.849021066|0.916928004|0.930281935|0.903644897|0.943872562|0.925440329|0.832669453|  
0.053206084|0.045229538|0.039158926|0.047692386|0.059589713|0.057044124|0.045546386|  
0.399888715|0.684265851|0.346237868|0.515121996|0.464613692|0.574750184|0.544573040|  
0.654909386|0.695685537|0.654574273|0.760823178|0.743569927|0.690271251|0.646651321|  
0.826995889|0.854849826|0.817024306|0.852994662|0.908062945|0.870745725|0.828272995|  
0.023353075|0.026903417|0.019804874|0.024071737|0.031965782|0.057099829|0.021058533|  
0.719462251|0.750342569|0.743306768|0.774323749|0.806106144|0.776506200|0.706349374|  
0.024239559|0.026035250|0.022226291|0.029145196|0.029971540|0.026280844|0.022574520|  
0.658429183|0.715693218|0.762926401|0.707016342|0.778666798|0.672882712|0.663493696|  
0.033087821|0.020905242|0.026626292|0.029492439|0.038425344|0.039170972|0.024776465|  
0.807901357|0.894362513|0.854714455|0.865471403|0.897858233|0.887905908|0.830123486|  
0.053331224|0.043132617|0.037447065|0.044276349|0.045202859|0.046247995|0.039969936|  
0.071428240|0.075626051|0.061134397|0.100331217|0.083696913|0.077694901|0.066920347|  
0.752049895|0.863008064|0.807986373|0.837685726|0.808912105|0.814271923|0.766727213|  
0.748808257|0.777206863|0.809048176|0.799105189|0.834445460|0.849706451|0.751799092|  
0.787984894|0.811574290|0.796360773|0.807472728|0.838118141|0.842035568|0.780982967|  
0.084138522|0.360961435|0.287548923|0.064869519|0.363378069|0.269807415|0.339641186|  
0.054390531|0.069666550|0.058258992|0.044107489|0.051213555|0.049183408|0.039497271|

0.028889352!0.035866509!0.027377616!0.030460852!0.032428336!0.030847163!0.027278256!  
0.069867033!0.059435292!0.129959616!0.068973986!0.097027784!0.071091865!0.060208192!  
0.112888434!0.123984642!0.107792709!0.132469415!0.137579421!0.137539602!0.111060282!  
0.024192845!0.041903122!0.024632515!0.029234977!0.047879591!0.044080984!0.027203580!  
0.099643217!0.101951715!0.085447930!0.104730970!0.119105909!0.108502536!0.091097712!  
0.069560825!0.094171737!0.091504199!0.080708320!0.127516380!0.145065626!0.074208900!  
0.034571817!0.041324920!0.047727838!0.051608150!0.038025924!0.048064997!0.037738458!  
0.137042639!0.128161417!0.155664628!0.160154734!0.170033371!0.160899650!0.127991733!  
0.038136606!0.093361713!0.050898912!0.037364755!0.043092687!0.047437838!0.037714922!  
0.413944915!0.469091598!0.515730533!0.495410195!0.545163009!0.498929926!0.443694026!  
0.028886903!0.031762145!0.023955570!0.026747344!0.039327949!0.031271714!0.025467532!  
0.260444683!0.292140170!0.194461851!0.218950933!0.249949337!0.297793457!0.206891337!  
0.731034854!0.748086330!0.771530766!0.726794822!0.824922706!0.806648478!0.700992700!  
0.065270300!0.124210510!0.078556388!0.073934557!0.086695888!0.094592810!0.069501817!  
0.390165389!0.596707989!0.452899167!0.625732904!0.659984501!0.537351900!0.465474679!  
0.063578757!0.081280903!0.057484362!0.090688229!0.083851112!0.074270848!0.060382042!  
0.030945072!0.032825988!0.030476444!0.038804770!0.037812155!0.033324844!0.028982775!  
0.057229342!0.059848242!0.062417098!0.084767028!0.071035129!0.070815718!0.057461670!  
0.165757158!0.155696575!0.145360692!0.160130515!0.146879312!0.158072905!0.138896049!  
0.024030786!0.039531980!0.035521969!0.037669373!0.041853188!0.031453327!0.026914289!  
0.837041317!0.910080288!0.870126419!0.897009781!0.935553896!0.892124874!0.864660586!  
0.019894639!0.020914319!0.020983430!0.022282061!0.033176588!0.028205638!0.019686377!  
0.034092115!0.037022673!0.031772783!0.031725932!0.038400833!0.037111992!0.031517907!  
0.367752212!0.512839172!0.395411444!0.578379388!0.580237826!0.496514254!0.404068936!  
0.044078984!0.046847028!0.043058626!0.044919363!0.041733571!0.043249703!0.035177910!  
0.443417353!0.376336288!0.387160104!0.437919438!0.473702185!0.474369949!0.395535031!  
0.061182898!0.043204651!0.041647887!0.048999825!0.046888144!0.064134272!0.045152407!  
0.189253035!0.164411432!0.147663634!0.178651022!0.175827079!0.209342960!0.154186709!  
0.887861506!0.912675549!0.929887247!0.924398813!0.945800094!0.948290243!0.899560586!  
0.026169234!0.021638457!0.024850469!0.026332762!0.022935594!0.026579208!0.021037159!  
0.743660813!0.778633025!0.734781629!0.750900882!0.776260954!0.791274594!0.718786737!  
0.067743886!0.077335134!0.034126644!0.036672201!0.047496010!0.051935075!0.039868794!  
0.038999798!0.033776400!0.046992451!0.038094281!0.037022713!0.035908678!0.031814757!  
0.538479692!0.659541444!0.502473880!0.571462314!0.611199439!0.600886122!0.511491595!  
0.940266409!0.880664696!0.923449062!0.913017448!0.911558903!0.931391400!0.940539739!  
0.035934372!0.074509984!0.037153604!0.073015458!0.153716241!0.090669867!0.044516892!  
0.075482551!0.216254200!0.169821955!0.217088839!0.214076457!0.212078252!0.140692312!  
0.041578679!0.045420691!0.038298018!0.044904751!0.037514721!0.046089325!0.035466395!  
0.050230538!0.092650032!0.068275551!0.085825802!0.097285805!0.083663313!0.058314327!  
0.329770111!0.353904512!0.247836822!0.325715027!0.366793070!0.374050858!0.293165852!  
0.015978631!0.018297443!0.016107787!0.016986762!0.019839937!0.022473414!0.016108390!  
0.483689013!0.478870765!0.398445232!0.349067464!0.511734385!0.364857529!0.355417634!  
0.291967914!0.294680405!0.262380475!0.289046872!0.304889804!0.322103408!0.268879146!  
0.194328235!0.159835182!0.185866611!0.211416926!0.225278275!0.215348697!0.167026286!

0.548317200 0.649081283 0.643290696 0.664383308 0.663696844 0.677295911 0.560490852  
0.392753205 0.520745883 0.454423125 0.542747882 0.530225153 0.508806566 0.426468357  
0.327652749 0.357979112 0.301649806 0.377907412 0.413316237 0.329583620 0.304810029  
0.070549810 0.089094422 0.069180828 0.072997090 0.090575206 0.072689206 0.064310873  
0.252544432 0.265308697 0.215765677 0.209837022 0.247583744 0.286237879 0.203188186  
0.475787844 0.505539177 0.467741076 0.521713609 0.646940769 0.576639735 0.481158822  
0.059392153 0.070338209 0.054469507 0.052021090 0.068587476 0.041135965 0.047307416  
0.091717838 0.077392592 0.078953379 0.071299841 0.120396940 0.117961768 0.080847387  
0.033519686 0.039890628 0.027538732 0.031535538 0.039993184 0.035579527 0.027588835  
0.055138261 0.068781905 0.071304406 0.060817291 0.059869728 0.046830178 0.053655285  
0.888632871 0.905352245 0.908191691 0.895816442 0.908238707 0.905611924 0.877261126  
0.866128356 0.895823351 0.899940575 0.911381354 0.909922921 0.911691140 0.872007765  
0.038034380 0.032737705 0.032374482 0.090097404 0.045641815 0.048004281 0.034500860  
0.723135895 0.828648524 0.807137437 0.769606344 0.806841924 0.766973907 0.738527752  
0.036174796 0.047994385 0.034359396 0.031587358 0.042354575 0.028488113 0.030370965  
0.021750813 0.031264398 0.031301089 0.025149647 0.033557931 0.035798075 0.022372533  
0.066173877 0.040243195 0.076986210 0.065137920 0.076462311 0.097803864 0.059219389  
0.060016211 0.123815245 0.071267304 0.074059536 0.093697007 0.081157418 0.063367447  
0.236624449 0.409275353 0.354852554 0.371450396 0.406129829 0.327746106 0.272423660  
0.154480422 0.088073787 0.087129231 0.080183352 0.086577646 0.106315201 0.080362843  
0.926112521 0.937166291 0.934800868 0.942939891 0.953355190 0.951029632 0.928553897  
0.873468059 0.868877221 0.887547103 0.877937953 0.900082837 0.901812204 0.854762468  
0.538699987 0.634533859 0.594784227 0.605259035 0.655922926 0.602258203 0.557247983  
0.036126432 0.039194773 0.033302133 0.030974119 0.040383386 0.038001253 0.029251645  
0.594774986 0.718809730 0.665883361 0.703355509 0.677013901 0.726127706 0.609847157  
0.029621492 0.021211148 0.029136460 0.043500595 0.027843909 0.026751136 0.026001199  
0.146200343 0.181470539 0.131613242 0.175945996 0.239612647 0.112116050 0.119854893  
0.020236953 0.021292094 0.023373585 0.020316774 0.020837800 0.017376425 0.017864064  
0.035822370 0.044166945 0.042444083 0.044732163 0.051754368 0.045786246 0.036712241  
0.038173606 0.070337376 0.050575577 0.079787201 0.057441741 0.064567749 0.048321073  
0.845556082 0.867062072 0.889873483 0.919263866 0.907972827 0.899915644 0.845293889  
0.930453353 0.819289667 0.904157348 0.901877415 0.886891547 0.928077165 0.931389669  
0.056202803 0.054630470 0.053918428 0.063446767 0.054547953 0.057832122 0.048555189  
0.030807027 0.025137334 0.031899968 0.027395318 0.036980082 0.031999898 0.028288449  
0.037346303 0.028677919 0.039615484 0.040771624 0.034967355 0.037269367 0.033410815  
0.771862871 0.849344555 0.814446530 0.844058288 0.874408268 0.837398287 0.791242457  
0.880748153 0.926348565 0.915984762 0.924306693 0.947364696 0.947451234 0.904717113  
0.457349979 0.531117680 0.473018002 0.536237648 0.580285878 0.526572724 0.459784163  
0.398488741 0.435893380 0.426078545 0.431869302 0.394565538 0.386741916 0.462017594  
0.035451585 0.042560054 0.048193903 0.059315759 0.060246309 0.050072985 0.041883011  
0.282410910 0.265680414 0.232945328 0.275752459 0.270443454 0.298624877 0.224532628  
0.038491507 0.039719594 0.044740639 0.038142757 0.038000947 0.052185390 0.033736051  
0.536978208 0.547843729 0.538767335 0.553041465 0.592162413 0.598900870 0.521521349  
0.028951174 0.038247506 0.029883342 0.034462721 0.037316121 0.032061310 0.028506352

0.693822988:0.728452596:0.672115278:0.718589140:0.715332453:0.782542284:0.665288267:  
0.880372697:0.852706461:0.857406725:0.868729292:0.892717378:0.880901731:0.852349442:  
0.036869139:0.063930081:0.040286183:0.051220071:0.068073063:0.055821810:0.038580872:  
0.500894153:0.589378379:0.478791216:0.571319567:0.613129778:0.573272980:0.485390167:  
0.710748594:0.850335608:0.788308095:0.813296781:0.859701439:0.796828828:0.752966932:  
0.046997820:0.036677998:0.046527705:0.054616386:0.046286111:0.045437950:0.039410190:  
0.068825261:0.088592663:0.076246196:0.071593938:0.173594455:0.084238801:0.076258823:  
0.703574228:0.816761807:0.761185575:0.793438018:0.822187778:0.823128388:0.751496665:  
0.020560951:0.019929915:0.022199856:0.021060976:0.019289541:0.014731895:0.016891504:  
0.840328987:0.875784164:0.873536373:0.898606313:0.928440370:0.855325787:0.838583248:  
0.093963355:0.074538806:0.065948482:0.061016679:0.076169359:0.073572433:0.065154637:  
0.756131273:0.761344541:0.763257252:0.838378192:0.836702918:0.803912064:0.761720954:  
0.732868171:0.844567652:0.773063488:0.833205905:0.854721324:0.814850181:0.757664050:  
0.575387431:0.796843461:0.627435027:0.839181446:0.823595680:0.780177432:0.630324059:  
0.022168503:0.427097574:0.373790317:0.022473654:0.477219233:0.213601351:0.728012327:  
0.043795262:0.044402364:0.038482707:0.037853202:0.038905323:0.037993601:0.036374286:  
0.131792376:0.129963930:0.102508253:0.114772879:0.125694399:0.135570982:0.105988483:  
0.843637851:0.904772272:0.891443004:0.899291131:0.927740277:0.918432113:0.861053985:  
0.053786122:0.059025913:0.062422339:0.068824497:0.070603801:0.062336190:0.057303857:  
0.014964294:0.022749258:0.021848269:0.022429048:0.024655251:0.022823167:0.019134954:  
0.841167255:0.911688701:0.873116915:0.916613444:0.928026832:0.908575089:0.872971764:  
0.962747086:0.965032243:0.971858252:0.974325767:0.966609414:0.976619571:0.974833979:  
0.045258074:0.060848230:0.058019043:0.052256871:0.049271315:0.056402449:0.043771382:  
0.854547066:0.897751472:0.873540715:0.899239024:0.914659207:0.913615721:0.877046363:  
0.018287799:0.029419802:0.019974418:0.027675866:0.032503760:0.023976342:0.021768847:  
0.104697059:0.131817697:0.097938536:0.125391030:0.104865303:0.131069162:0.095623395:  
0.039889880:0.058470316:0.059429966:0.054174847:0.057395915:0.060101918:0.046543837:  
0.934626155:0.966411940:0.964653804:0.958505460:0.946504539:0.960403354:0.963355146:  
0.768838332:0.677469258:0.824428682:0.786408504:0.831143805:0.806796559:0.837599375:  
0.360496964:0.434037701:0.355707268:0.369079209:0.440070135:0.450298089:0.361102944:  
0.058632338:0.085324188:0.064791539:0.064800834:0.065104596:0.065663805:0.056715848:  
0.618231113:0.751575365:0.652783708:0.720548653:0.785415827:0.775266666:0.665725550:  
0.589379671:0.681010718:0.669719112:0.699551719:0.734789579:0.696435450:0.626469022:  
0.426945696:0.503789828:0.495227305:0.524200673:0.644231537:0.555320310:0.456493358:  
0.041823606:0.041135914:0.025592004:0.039860261:0.044261574:0.054995313:0.032612700:  
0.069965410:0.103770366:0.069667220:0.101240813:0.112651533:0.086976227:0.074571630:  
0.037793981:0.044048334:0.060604800:0.040236009:0.047823917:0.063007418:0.065915395:  
0.025995043:0.037036297:0.035747442:0.037484117:0.042604308:0.030714375:0.027539603:  
0.424017769:0.497695002:0.403862974:0.529914628:0.558152265:0.571005453:0.438857287:  
0.889888740:0.872071117:0.900350469:0.918065720:0.913489758:0.923430588:0.880757048:  
0.043320959:0.056254456:0.039731728:0.063733740:0.061131402:0.041515354:0.042447261:  
0.599504674:0.695088570:0.634061822:0.699872131:0.712854124:0.684481488:0.627383037:  
0.027673830:0.037614068:0.032848982:0.054336468:0.038057642:0.046813782:0.032155993:  
0.329912042:0.234219706:0.276142236:0.323813700:0.432508749:0.371871491:0.272520332:



0.196090103!0.236656430!0.114637945!0.126548439!0.146479990!0.218229712!0.135415100!  
0.025444693!0.027277520!0.021257022!0.023707076!0.031096539!0.035512169!0.023463414!  
0.863952029!0.882343975!0.872584079!0.898054257!0.895494755!0.900914719!0.869453971!  
0.819422112!0.844500742!0.879161205!0.862364937!0.884056327!0.850494940!0.831954748!  
0.134937658!0.218416957!0.148278469!0.182486257!0.184261205!0.128343003!0.133777704!  
0.058648496!0.053028780!0.055151060!0.061080341!0.062570185!0.063596305!0.051832361!  
0.031442605!0.077410862!0.035368014!0.044654415!0.062032832!0.042005449!0.032549800!  
0.031524437!0.034394916!0.032398557!0.037004288!0.039631228!0.030125120!0.028018712!  
0.807306242!0.849827139!0.846169957!0.891790928!0.885483789!0.887806231!0.835918439!  
0.395595631!0.477907035!0.398736793!0.385186685!0.495943521!0.441473028!0.386514556!  
0.028820752!0.055070094!0.039104703!0.046793752!0.062065800!0.050235960!0.035854745!  
0.446009381!0.522324299!0.318201007!0.346708795!0.476139367!0.475648903!0.341886061!  
0.047800892!0.065887101!0.052613695!0.070525757!0.072724996!0.068672394!0.057781214!  
0.176593757!0.154696076!0.122721721!0.141551116!0.153684225!0.158584720!0.132207515!  
0.552900399!0.675899521!0.601760061!0.628811040!0.651258972!0.682109608!0.581025147!  
0.696967352!0.649603003!0.743851434!0.716629936!0.761635224!0.705838437!0.640399612!  
0.339084734!0.334780026!0.361137153!0.318037889!0.374225640!0.386863962!0.291246591!  
0.114197330!0.118234419!0.112984178!0.121999397!0.135467402!0.142571512!0.118365467!  
0.064240552!0.073797590!0.088424616!0.131215251!0.058459669!0.114405462!0.071760768!  
0.043467025!0.066608778!0.042486304!0.046076294!0.085154447!0.068439438!0.047414015!  
0.025350205!0.019814423!0.015380919!0.024107529!0.025248680!0.020291569!0.018914553!  
0.480282341!0.514250385!0.443569953!0.524493744!0.509401824!0.526380039!0.408221638!  
0.043714350!0.087880376!0.065740149!0.066232276!0.093833128!0.061580829!0.056898004!  
0.072820063!0.041612406!0.030399073!0.050516708!0.044029362!0.045677475!0.039965503!  
0.043522854!0.026864548!0.030900769!0.037855285!0.033562172!0.027509027!0.026576279!  
0.079137730!0.049546051!0.055968197!0.071761929!0.109480783!0.088862269!0.064755559!  
0.336229272!0.349999546!0.353743633!0.401628164!0.379740244!0.341566063!0.332108525!  
0.081382323!0.140087450!0.065310897!0.070832258!0.094434618!0.092651504!0.072824497!  
0.044733032!0.068349296!0.045132253!0.053930981!0.069465882!0.054224228!0.047234034!  
0.154884812!0.165303912!0.092165239!0.107120236!0.123688283!0.149992015!0.099899915!  
0.021784029!0.036891679!0.029643523!0.031645401!0.038200524!0.034534095!0.026846891!  
0.086275793!0.062861180!0.046402907!0.070092008!0.088636179!0.099089027!0.060664276!  
0.378596364!0.544118788!0.423653993!0.369932917!0.427781481!0.451237632!0.361365578!  
0.588899104!0.673929289!0.623804265!0.699995303!0.716040918!0.687287055!0.586238265!  
0.420097356!0.492407509!0.442265145!0.496762771!0.462873761!0.455915400!0.417876921!  
0.810671987!0.890631496!0.874760888!0.871000811!0.899869381!0.889740838!0.831320934!  
0.061919249!0.075630402!0.066664720!0.076383949!0.068888502!0.078444629!0.057851108!  
0.065814301!0.072401703!0.078894917!0.105178712!0.082094453!0.084908459!0.061578839!  
0.020921166!0.028276793!0.017408127!0.027334913!0.027332379!0.024222368!0.021055616!  
0.185813292!0.171457299!0.165575372!0.172443558!0.220994614!0.188439004!0.164344044!  
0.889976547!0.899566750!0.893031134!0.888059321!0.931070211!0.916204506!0.885092218!  
0.023294952!0.020629978!0.020327090!0.024878426!0.018329831!0.018125163!0.018505810!  
0.018940515!0.018424620!0.020126916!0.024277418!0.020424313!0.020771793!0.018771817!  
0.040361081!0.067780750!0.047936200!0.054005684!0.065104495!0.053883297!0.043874007!

0.046975231|0.054619148|0.050169226|0.051438426|0.048103619|0.052811171|0.045306311|  
0.028246015|0.035038028|0.033087832|0.035651910|0.028909520|0.023057001|0.026189859|  
0.026715689|0.025706659|0.027822479|0.033287285|0.041916799|0.036198922|0.028262552|  
0.731767488|0.835792845|0.820381716|0.825575776|0.866512966|0.769377681|0.783148346|  
0.048732891|0.043146688|0.042546239|0.049443335|0.045641960|0.050509247|0.040351667|  
0.788327927|0.872144267|0.864019723|0.874715531|0.904227994|0.841927217|0.807574492|  
0.749108253|0.865677121|0.839275742|0.855437599|0.865608206|0.858969788|0.812194182|  
0.061765026|0.088442105|0.130437909|0.091765579|0.094059221|0.102742168|0.074062891|  
0.658989856|0.812497858|0.755118410|0.799331409|0.831397775|0.766137931|0.704076023|  
0.030830237|0.029900972|0.062341074|0.033758452|0.149816524|0.042030922|0.029172805|  
0.503814261|0.437139600|0.675144279|0.310951491|0.671568001|0.491970726|0.642917134|  
0.028342897|0.026910207|0.025631893|0.027754845|0.023377409|0.023841719|0.024511430|  
0.053455657|0.044175066|0.051783766|0.054480044|0.052475099|0.065596985|0.046100093|  
0.066421767|0.063549099|0.057012927|0.079028303|0.078125697|0.097678331|0.058095748|  
0.718719432|0.762140890|0.721295756|0.807020553|0.811005578|0.774011891|0.720843960|  
0.022987413|0.020852365|0.016770260|0.018086403|0.025570955|0.033296573|0.019291377|  
0.802447489|0.848000148|0.832504245|0.843674036|0.864040862|0.826282858|0.804411113|  
0.872914015|0.879891546|0.880018674|0.864668465|0.908614541|0.919977002|0.859584688|  
0.021787316|0.041205034|0.034462952|0.042644945|0.047068141|0.037977104|0.031948665|  
0.229216972|0.344394586|0.470327417|0.464531869|0.504194224|0.394007908|0.329564045|  
0.057466550|0.038867678|0.048165940|0.053327504|0.064150013|0.093277200|0.045658087|  
0.043839281|0.052599104|0.061667491|0.060925157|0.052904654|0.065906012|0.043773144|  
0.893402246|0.931375956|0.907304480|0.929960959|0.936153899|0.943336926|0.910238230|  
0.023215055|0.035388259|0.023272078|0.037141070|0.039931922|0.037972250|0.027707536|  
0.682562127|0.695090301|0.695434515|0.711623959|0.771696462|0.700689938|0.690702207|  
0.197444229|0.225841996|0.189582968|0.203880786|0.233316670|0.256171516|0.190791434|  
0.215505235|0.179524324|0.170203306|0.156435003|0.208484512|0.195518357|0.167356710|  
0.139104325|0.122618907|0.115942981|0.100647482|0.128470363|0.122073903|0.097386614|  
0.323716854|0.241283495|0.273990414|0.432575459|0.398636931|0.351755847|0.257826660|  
0.687700345|0.776891000|0.719673486|0.795069012|0.781976263|0.768314044|0.651900466|  
0.032708502|0.035793673|0.038758151|0.048663925|0.035935740|0.054132754|0.035006124|  
0.368995210|0.497930724|0.469724639|0.484120242|0.502460916|0.491302031|0.409248651|  
0.052228895|0.048268154|0.050727414|0.060762908|0.077428824|0.058274519|0.051494242|  
0.038497465|0.038528771|0.038021705|0.043792457|0.046056931|0.047478142|0.038432772|  
0.166686237|0.134491738|0.157026701|0.167051246|0.191178436|0.163682587|0.146008229|  
0.253691764|0.361026531|0.267731165|0.330924246|0.343681650|0.283723635|0.228965956|  
0.680720983|0.762075697|0.799550757|0.810678030|0.839502912|0.822660504|0.735731235|  
0.889328961|0.916462034|0.900965842|0.891085463|0.891818468|0.892057648|0.906301015|  
0.036324511|0.053189358|0.034893147|0.030865178|0.041749095|0.033164658|0.030116448|  
0.415888717|0.525429143|0.480661086|0.606304587|0.530858626|0.528091449|0.457467548|  
0.115058956|0.088556170|0.080301142|0.085653024|0.105563603|0.115937291|0.079222979|  
0.810897070|0.793102314|0.846354010|0.843353217|0.835275769|0.872400981|0.799630057|  
0.181541589|0.234742120|0.203958910|0.213141479|0.193707241|0.262291108|0.295966793|  
0.662614916|0.789820678|0.667772977|0.836186844|0.825905348|0.774801724|0.667774621|

0.266554829|0.314056966|0.318277534|0.311972295|0.318617288|0.317632531|0.271057535|  
0.873511892|0.901141629|0.899351125|0.921934516|0.932671135|0.920209702|0.886714815|  
0.793205993|0.847247540|0.807094774|0.836429790|0.870574925|0.844166176|0.807232172|  
0.823056184|0.860082436|0.845719234|0.868441716|0.879236549|0.887539047|0.827651472|  
0.027526088|0.034217983|0.034274919|0.039342138|0.041983139|0.037479536|0.031402516|  
0.273044113|0.139216565|0.159126989|0.252255716|0.150720729|0.162240518|0.232373682|  
0.075960374|0.082490728|0.068444827|0.086239336|0.096107659|0.086445383|0.075586926|  
0.036893072|0.055489560|0.040298397|0.045975815|0.052992775|0.038179592|0.035936881|  
0.870281134|0.900676375|0.914342606|0.927374084|0.936105961|0.933978150|0.894630369|  
0.296790132|0.416239815|0.335769647|0.278010292|0.346861775|0.334027682|0.298412532|  
0.055477452|0.054820899|0.060931240|0.062941556|0.050386017|0.054387978|0.051545548|  
0.178684285|0.198750760|0.209268570|0.324726445|0.236274691|0.197448022|0.170308681|  
0.020521385|0.021212585|0.020357790|0.023249310|0.027117555|0.032618220|0.021444400|  
0.665841962|0.757932526|0.736518397|0.759445947|0.734068786|0.690693075|0.667356775|  
0.222635003|0.186878310|0.154092651|0.149925496|0.219386211|0.225927323|0.153730360|  
0.614442650|0.726546493|0.707481699|0.757293529|0.755164483|0.698706527|0.662255962|  
0.033200801|0.041819421|0.028217550|0.031227657|0.025897779|0.042365642|0.029655919|  
0.191483134|0.202981211|0.236917714|0.275282874|0.280812592|0.200225929|0.181596703|  
0.079096426|0.092461996|0.072975452|0.082874541|0.100625872|0.105231418|0.068129760|  
0.028231899|0.024899068|0.038259388|0.022498828|0.058146595|0.030676103|0.026377785|  
0.967041149|0.965497684|0.967760801|0.966663334|0.973702851|0.972838522|0.972455677|  
0.153336333|0.173873724|0.143947688|0.204744990|0.206760613|0.187103524|0.153999128|  
0.513144547|0.554673193|0.568911826|0.609469364|0.629709838|0.584754389|0.531620926|  
0.746297031|0.805811181|0.676510804|0.822298980|0.838526399|0.804198751|0.749440787|  
0.225373228|0.252947051|0.158935559|0.147028937|0.138275226|0.206097885|0.143782554|  
0.275895117|0.230081018|0.258716838|0.279479390|0.293541532|0.328506317|0.238594180|  
0.054072764|0.062720282|0.061565781|0.080956713|0.058326416|0.074404241|0.056853853|  
0.030039619|0.022057101|0.027407711|0.023790788|0.069977014|0.031101315|0.025590640|  
0.079729223|0.159627640|0.176691436|0.142328537|0.193553728|0.185973816|0.102908213|  
0.882042454|0.913788625|0.903892352|0.894111231|0.912197719|0.941678073|0.881069274|  
0.051438218|0.056483674|0.047522909|0.063027747|0.066382460|0.068627195|0.051419034|  
0.046472788|0.073404674|0.054147147|0.072453507|0.075046392|0.084498944|0.052909725|  
0.664010653|0.757755658|0.769709492|0.735503705|0.787219603|0.799161991|0.711997317|  
0.072785600|0.075987568|0.068589169|0.085364661|0.076714325|0.083710105|0.070479029|  
0.438485794|0.584993149|0.614639280|0.649913743|0.591922368|0.579854443|0.505647054|  
0.592223419|0.455863248|0.533454793|0.421096278|0.491959431|0.509587001|0.453729581|  
0.893603090|0.867950193|0.869710207|0.869855267|0.814391888|0.899634085|0.890347265|  
0.132981958|0.144920515|0.149128335|0.218676499|0.229314377|0.184883327|0.141141376|  
0.660054103|0.675618526|0.700822257|0.682443409|0.658577551|0.599425665|0.605638596|  
0.169877094|0.162543106|0.155039827|0.197045011|0.215552633|0.168530540|0.151500137|  
0.336670687|0.368255711|0.373800208|0.417506439|0.435862333|0.445144315|0.365002216|  
0.585286928|0.606315079|0.588500039|0.644104938|0.611331937|0.617073648|0.634424504|  
0.798866350|0.770573572|0.795188731|0.790216282|0.822928361|0.800822104|0.769671258|  
0.281342811|0.320475483|0.302047471|0.279400195|0.336226640|0.318314831|0.276032369|

0.025552876 0.019754097 0.020832831 0.018625010 0.022863757 0.024096227 0.019598364  
0.057058497 0.079878380 0.097575118 0.135898755 0.085083991 0.141296189 0.068822357  
0.107589610 0.199342225 0.159168351 0.159976086 0.170799380 0.106659653 0.110501287  
0.563016292 0.720083948 0.694887239 0.631894396 0.674965011 0.646559094 0.600776052  
0.463640432 0.603657274 0.439386785 0.561748454 0.580780656 0.517734007 0.461613102  
0.244223800 0.220498783 0.258132672 0.237361410 0.197307044 0.236438399 0.207867726  
0.829545313 0.786096222 0.830021390 0.772768095 0.839999309 0.823889883 0.856478252  
0.375225179 0.533015712 0.372903836 0.586979311 0.582498679 0.401175337 0.365496336  
0.052101512 0.052513207 0.060549858 0.049328217 0.062315307 0.047843188 0.044863036  
0.750774838 0.837895260 0.805557648 0.824517596 0.882389013 0.842614408 0.783111877  
0.826550633 0.812823216 0.813629541 0.815261984 0.814945736 0.863415647 0.801400055  
0.212269709 0.211335428 0.208941832 0.325280319 0.283949351 0.261327328 0.206851320  
0.703829782 0.745329280 0.748277317 0.789078166 0.812221312 0.778551135 0.670865778  
0.861545870 0.882310802 0.923693648 0.845195593 0.913473073 0.805690812 0.799797715  
0.034315569 0.034311881 0.027934145 0.029213198 0.037314629 0.047079639 0.029810436  
0.555095327 0.565948568 0.572822339 0.618636891 0.677306212 0.759010884 0.534329740  
0.038545721 0.054723557 0.043996032 0.053884982 0.077821965 0.038191934 0.039522530  
0.069162139 0.076392285 0.071125448 0.081230589 0.058097862 0.076902779 0.063522262  
0.026681776 0.029562620 0.030939671 0.043636984 0.034548016 0.025578204 0.025251339  
0.631542986 0.691671643 0.627282169 0.771742596 0.734811139 0.698144468 0.617184208  
0.952874141 0.919633895 0.944705763 0.931912416 0.912978750 0.944560827 0.952449378  
0.108053056 0.130825860 0.078084534 0.092289783 0.123808720 0.081916957 0.082316128  
0.513357298 0.710764917 0.637686844 0.655657820 0.646745391 0.593831089 0.585745605  
0.198363515 0.202362609 0.154953726 0.179714843 0.197499645 0.245394112 0.166558710  
0.449464314 0.536587893 0.507393265 0.454999711 0.512677740 0.518537685 0.458353258  
0.023648402 0.030835649 0.029665650 0.027667842 0.032538900 0.035501151 0.025544835  
0.848547846 0.860461821 0.815174260 0.922285866 0.927401454 0.916862663 0.823265513  
0.039726880 0.045998516 0.033874923 0.031661781 0.041661933 0.029003226 0.032025110  
0.658228785 0.599300125 0.606233211 0.609012745 0.655237118 0.714720873 0.586415148  
0.062671491 0.060647766 0.061399220 0.060029799 0.086081533 0.064559716 0.050405903  
0.306980774 0.360646964 0.309038243 0.415322807 0.329140387 0.346690776 0.299194702  
0.260088563 0.249603648 0.363450735 0.289004925 0.302720758 0.331486698 0.370909913  
0.040530713 0.061661715 0.045195772 0.059435925 0.066253473 0.057709082 0.044384344  
0.023502992 0.037086843 0.037444939 0.044694261 0.042137000 0.031828778 0.028287866  
0.307686939 0.318404711 0.295600157 0.330346020 0.356429903 0.304549851 0.285932494  
0.022144048 0.027727983 0.019369562 0.022869733 0.022454184 0.021240786 0.019312785  
0.707500221 0.745557313 0.728754221 0.758218132 0.794885346 0.781140764 0.722520868  
0.029430316 0.033959327 0.031289686 0.031574837 0.033648066 0.031502168 0.027101468  
0.595846781 0.682846616 0.681909884 0.780962618 0.800147901 0.727157616 0.673330721  
0.193789392 0.200963007 0.155060698 0.165592310 0.124246709 0.195342050 0.228079618  
0.034851960 0.041522831 0.037664656 0.031807759 0.034619357 0.032006896 0.030072662  
0.030241495 0.033254204 0.029960337 0.024593312 0.034096137 0.022861695 0.024150911  
0.072374529 0.070758041 0.079172313 0.077999610 0.084428021 0.092417090 0.073049544  
0.657083091 0.840483829 0.816177133 0.852814756 0.756286149 0.755839903 0.727328196

0.454605593 0.535096063 0.483234232 0.555504729 0.542504007 0.506051435 0.434585746  
0.843037368 0.891634091 0.884619162 0.868895631 0.909114673 0.900472775 0.861731405  
0.436674651 0.544808319 0.541940636 0.581451536 0.599506858 0.540987501 0.486565682  
0.459375619 0.557245671 0.529970515 0.564115923 0.597654669 0.556577077 0.490063015  
0.040352710 0.037855921 0.050099775 0.045974731 0.089106287 0.069368229 0.084136431  
0.561812092 0.551453722 0.526596231 0.553062629 0.589213669 0.603911420 0.515135987  
0.503134215 0.521514548 0.591179230 0.608244507 0.672069968 0.653042776 0.530397433  
0.739033671 0.882996906 0.825878465 0.870282256 0.867487714 0.834389807 0.776765104  
0.335270413 0.396614260 0.372541611 0.422052644 0.441822921 0.434947375 0.370722354  
0.024566389 0.041371196 0.027042827 0.031516754 0.034622343 0.032272385 0.027555188  
0.088865201 0.050840647 0.080088908 0.061282385 0.086642233 0.109561537 0.067187787  
0.051999953 0.060014119 0.042268497 0.046396647 0.085749404 0.091848277 0.045557148  
0.770026216 0.701652411 0.766375438 0.760378538 0.719085682 0.821769509 0.782022262  
0.144177307 0.128504744 0.139761205 0.199974465 0.206276554 0.170778526 0.143711573  
0.730912913 0.755663819 0.740227071 0.775641635 0.782108060 0.795203054 0.726562913  
0.185160853 0.245578592 0.130219765 0.132729600 0.165912321 0.231530747 0.141911203  
0.015338550 0.028374376 0.022491416 0.025276963 0.030469286 0.018190692 0.018567138  
0.359524367 0.356872676 0.326563166 0.406347960 0.392960702 0.391821190 0.325228267  
0.324364666 0.491191346 0.326918366 0.382185975 0.375423623 0.360666570 0.320106858  
0.529838921 0.739203396 0.708749406 0.718910071 0.813059594 0.737342524 0.667556631  
0.844858288 0.829888697 0.860530773 0.860991029 0.835537098 0.873850609 0.870284870  
0.046182210 0.053535275 0.042121150 0.037463941 0.053090656 0.039389599 0.037678476  
0.026408499 0.046425755 0.038738631 0.056900596 0.051435250 0.048033727 0.034773988  
0.062143594 0.062707129 0.063067195 0.075182971 0.059904263 0.082229363 0.057281593  
0.719090015 0.733268285 0.633491128 0.716661005 0.769959672 0.771752940 0.639261723  
0.408966287 0.374610669 0.423385031 0.502132719 0.419585666 0.412883437 0.471175316  
0.148472654 0.195462645 0.143485318 0.216199003 0.216709177 0.179380087 0.147476336  
0.081189655 0.180329274 0.116939925 0.144830609 0.196687504 0.177652360 0.103309818  
0.036954293 0.042405878 0.033127722 0.051723401 0.056720791 0.057876173 0.038564602  
0.211857496 0.202450653 0.201603601 0.219668385 0.244174018 0.223460088 0.190337511  
0.095840898 0.070154504 0.078503823 0.087868552 0.081705851 0.084135611 0.073263440  
0.464655319 0.516008406 0.482069185 0.430764793 0.574126522 0.528968960 0.462584569  
0.040716247 0.063534688 0.040496438 0.035752833 0.041700429 0.033939576 0.034183285  
0.438690553 0.510095156 0.462378756 0.511362344 0.555760682 0.534398414 0.457943007  
0.904245049 0.909426364 0.905769575 0.921322258 0.936960444 0.926602178 0.900710639  
0.868352579 0.910927641 0.917134272 0.935037297 0.938093029 0.916712742 0.894996365  
0.402227622 0.412177180 0.382592959 0.384776074 0.421524630 0.406434671 0.369389137  
0.028196999 0.019635922 0.020054382 0.021521247 0.021113191 0.022063107 0.017951338  
0.897243328 0.866148902 0.873923541 0.889540349 0.918569237 0.905736854 0.855605182  
0.038132034 0.039531575 0.033427816 0.049169578 0.047514038 0.059154015 0.036624545  
0.773525491 0.855049431 0.834431882 0.857306519 0.850818355 0.878450998 0.803505368  
0.583423441 0.718060155 0.674532701 0.728365200 0.708650151 0.661494060 0.629363483  
0.054096075 0.154136909 0.078330100 0.088656006 0.110419099 0.062600826 0.064963596  
0.039585036 0.038886016 0.034494360 0.040359439 0.044944783 0.037106716 0.033958954

0.051043674|0.036022435|0.043881084|0.069955777|0.051034466|0.050978363|0.041055525|  
0.649138426|0.645924662|0.679727473|0.658327194|0.714105504|0.721924181|0.588182424|  
0.950868107|0.918072029|0.966283921|0.965174629|0.968580893|0.956097375|0.965826861|  
0.030086546|0.033788031|0.027559099|0.030158870|0.026630135|0.034230325|0.024233250|  
0.032606388|0.024897435|0.033326088|0.033239948|0.036562095|0.038855114|0.029845023|  
0.874943692|0.705278433|0.850260033|0.817133174|0.726201128|0.853766119|0.861338394|  
0.037350277|0.059292870|0.033173757|0.053717759|0.067834875|0.046069263|0.041039305|  
0.559472772|0.671450860|0.688278452|0.668837747|0.759529923|0.723047329|0.625743165|  
0.038031150|0.041135660|0.040695340|0.042022691|0.049857359|0.050447546|0.038967429|  
0.032144783|0.032005006|0.042926384|0.047745817|0.041393292|0.051902320|0.033686674|  
0.375581444|0.396528978|0.365873672|0.434803526|0.427988510|0.424655633|0.375468413|  
0.046319943|0.041062470|0.050805580|0.056629130|0.054448003|0.054623543|0.042630549|  
0.408244892|0.476711887|0.417478351|0.456141387|0.509878180|0.451960153|0.411573341|  
0.142623312|0.213843775|0.131712634|0.231990772|0.276585565|0.131616849|0.123666741|  
0.155602516|0.153984801|0.095687131|0.124926544|0.140533888|0.179623682|0.121279028|  
0.288883751|0.337903858|0.335220797|0.397834054|0.385246398|0.416706217|0.335117047|  
0.587588647|0.743673564|0.581457549|0.543989189|0.545627904|0.666254229|0.674607246|  
0.831151580|0.837293900|0.845269914|0.845442307|0.873540154|0.862494606|0.826527803|  
0.326632231|0.367377179|0.263552470|0.278967904|0.347214804|0.314642857|0.258567150|  
0.788166189|0.830147384|0.800133362|0.756054424|0.849851340|0.793711158|0.762927276|  
0.054705725|0.049534562|0.045782563|0.051054342|0.053306789|0.052526567|0.044692681|  
0.035560256|0.032965313|0.028655574|0.027367809|0.030225701|0.023720924|0.025930342|  
0.048496107|0.093670232|0.069555228|0.062563915|0.095231392|0.083191836|0.061425517|  
0.033334183|0.049955982|0.042748435|0.050985591|0.052740675|0.054553807|0.040035566|  
0.026914547|0.069302800|0.045986039|0.061965674|0.074856400|0.051015434|0.038060245|  
0.268720557|0.293207338|0.263876578|0.231156826|0.270393561|0.322474355|0.238620320|  
0.077891281|0.087817759|0.077695080|0.108629721|0.148279373|0.084003206|0.075238262|  
0.032613405|0.026764484|0.031619848|0.048297395|0.031908097|0.041815375|0.028490629|  
0.151987339|0.137239305|0.128865106|0.162819753|0.140807476|0.210823362|0.127407850|  
0.690312851|0.646148407|0.673940437|0.675579711|0.677848865|0.754778620|0.609957882|  
0.047804275|0.034833569|0.036139007|0.043472825|0.036311401|0.044184497|0.034274128|  
0.911693769|0.915724492|0.925081687|0.933938607|0.936661129|0.929359283|0.911043965|  
0.074035310|0.143026698|0.093955276|0.111587918|0.132894015|0.102308915|0.081763487|  
0.041205529|0.035687322|0.039903030|0.071724747|0.122715823|0.086034627|0.036721310|  
0.605138935|0.672736211|0.621185614|0.641877285|0.713047229|0.662051107|0.599683807|  
0.219552432|0.222366964|0.194444833|0.227087885|0.211105873|0.219037900|0.182902694|  
0.049451830|0.103386270|0.074985986|0.108135319|0.097595858|0.090501515|0.066921187|  
0.392094078|0.388696245|0.322544133|0.403347429|0.436695534|0.366106650|0.335255492|  
0.315293211|0.384559938|0.371647211|0.337138195|0.480295443|0.425870338|0.299915331|  
0.691539021|0.831070429|0.762928026|0.799398779|0.834699835|0.803068255|0.729984284|  
0.044533883|0.062002962|0.036021862|0.063781438|0.069317984|0.057865222|0.041906728|  
0.058842892|0.050352865|0.045608466|0.073350331|0.070678758|0.053718275|0.048429072|  
0.426677848|0.391857327|0.421491507|0.469256600|0.495442976|0.493926190|0.395656237|  
0.746700459|0.846347370|0.801641737|0.816231055|0.869307968|0.787439076|0.778512181|

0.039400217;0.050936828;0.039084398;0.068645473;0.090248505;0.030256905;0.033947366  
0.030277724;0.033477699;0.027425343;0.044226987;0.036212165;0.040265377;0.030156051;  
0.029418120;0.035383102;0.028994272;0.032563156;0.032732101;0.032459552;0.027406553;  
0.034839463;0.035888496;0.041813734;0.036616388;0.032782195;0.028517844;0.031191667;  
0.042110844;0.035730737;0.052651102;0.049561355;0.069759609;0.045040155;0.036299994;  
0.049928006;0.049857664;0.047300402;0.062333290;0.059276305;0.062688043;0.048067340;  
0.042131601;0.091645526;0.050524355;0.054223213;0.085722974;0.062840076;0.045959482;  
0.035068778;0.045533087;0.037578067;0.049768509;0.046593874;0.033024795;0.032793734;  
0.021257852;0.013520131;0.017929439;0.018747924;0.021736697;0.016472847;0.015245583;  
0.380808620;0.525564528;0.378719981;0.375238291;0.490789460;0.462611342;0.355307458;  
0.073518901;0.087894004;0.062134232;0.081093870;0.067675808;0.047417077;0.059876323;  
0.033569879;0.061938555;0.064422387;0.070825341;0.067377399;0.076687208;0.055027204;  
0.038486314;0.039483478;0.029156262;0.046884072;0.066378611;0.054357884;0.036563977;  
0.544955089;0.569119316;0.602887516;0.497276026;0.636919237;0.659585181;0.532025112;  
0.910695009;0.886787121;0.941526526;0.935390577;0.950666684;0.924616690;0.939758216;  
0.807155988;0.756611189;0.751998651;0.614560221;0.756038056;0.787537121;0.676262894;  
0.670651704;0.749299115;0.728888474;0.739249189;0.764743638;0.685216816;0.669015764;  
0.624695562;0.743693840;0.691999394;0.778986907;0.739533167;0.775326713;0.668919336;  
0.905653516;0.872922393;0.898739773;0.868454377;0.903118484;0.903851199;0.867444833;  
0.787119026;0.647201356;0.727636936;0.821687817;0.774318307;0.829382311;0.832116210;  
0.018553791;0.019380915;0.013410286;0.015336187;0.019370619;0.018531099;0.014935244;  
0.934999928;0.899590306;0.946480033;0.907310247;0.953176241;0.958902346;0.948239231;  
0.916099369;0.917794895;0.916506161;0.929220830;0.924393075;0.939180957;0.908197940;  
0.042461121;0.052386797;0.048139815;0.055512135;0.067813086;0.072053462;0.046240976;  
0.028808230;0.037891921;0.029434741;0.067617851;0.036876899;0.032252675;0.029361333;  
0.426226761;0.503577969;0.434233588;0.503727676;0.572232381;0.512826714;0.451445872;  
0.037268506;0.029685307;0.033016132;0.115688939;0.032788097;0.024573194;0.027852052;  
0.084151382;0.071097237;0.064181252;0.083970588;0.059530612;0.101906337;0.065875920;  
0.064120856;0.057983574;0.052556099;0.073832244;0.069620020;0.130754421;0.059917722;  
0.022280929;0.043511481;0.032546851;0.029620760;0.049109587;0.029634913;0.026789314;  
0.053922060;0.046555717;0.047340468;0.048355436;0.061528838;0.051321094;0.045549436;  
0.023453959;0.030843988;0.023704391;0.030161798;0.032796721;0.026630366;0.024341013;  
0.630817177;0.612498860;0.627169652;0.694088929;0.690175539;0.733028052;0.615149427;  
0.793397552;0.857998929;0.862901618;0.888986594;0.867950010;0.861220681;0.824596341;  
0.047026287;0.113765549;0.080721788;0.101575681;0.095167417;0.096033471;0.062860315;  
0.828905171;0.851492059;0.878327800;0.882800314;0.889940703;0.903578493;0.892127151;  
0.204776123;0.195865664;0.161808595;0.143944975;0.203583071;0.193262342;0.145317114;  
0.624118354;0.594479213;0.689751784;0.748699419;0.616366872;0.730136414;0.735991686;  
0.029081837;0.034152446;0.034001254;0.046579316;0.045130628;0.063526452;0.032954432;  
0.031011018;0.049802563;0.030106780;0.061139102;0.053589481;0.056593445;0.036870574;  
0.332315981;0.373032092;0.312563203;0.350028913;0.426227700;0.426291717;0.327767295;  
0.498520177;0.650826242;0.604078883;0.604289160;0.444817441;0.533655140;0.608606490;  
0.638468795;0.756650781;0.780423334;0.791634189;0.809942396;0.790394145;0.722711633;  
0.027216045;0.038115099;0.036399096;0.022900877;0.042936399;0.042629523;0.027910130;

0.041310386|0.057374495|0.052597697|0.057190403|0.064083648|0.058372205|0.047349584|  
0.481378099|0.459183667|0.437013609|0.431062366|0.529946494|0.518188734|0.419163803|  
0.043340192|0.031853041|0.029239301|0.038229582|0.043688730|0.031029611|0.030466976|  
0.017520170|0.023279391|0.021442414|0.023096375|0.021582925|0.029385956|0.019517801|  
0.478138734|0.539035092|0.503623464|0.578408631|0.584973100|0.606839162|0.493259196|  
0.630841847|0.623106057|0.666522431|0.681361604|0.707460664|0.718487046|0.624537370|  
0.036718339|0.046469325|0.041483074|0.035257926|0.043575239|0.033277234|0.032124979|  
0.669149196|0.790216269|0.703545984|0.735336398|0.776616092|0.796023708|0.685446197|  
0.455849756|0.547546988|0.471314804|0.421055851|0.488607440|0.497569312|0.423747192|  
0.555309309|0.742495887|0.668369366|0.647390218|0.617618265|0.623204502|0.578568948|  
0.061636529|0.062088436|0.072156579|0.074177273|0.070692855|0.086977555|0.062073524|  
0.618850016|0.609402653|0.610827471|0.659630310|0.604182515|0.623753989|0.566180615|  
0.658594179|0.756979943|0.696655048|0.749904956|0.764789727|0.728286395|0.688567258|  
0.658028150|0.795912435|0.726847036|0.826911794|0.819527330|0.821199808|0.710124809|  
0.134238213|0.121738787|0.111801331|0.121496884|0.146770402|0.198983194|0.115793079|  
0.119015272|0.100550279|0.150256364|0.128368421|0.154325972|0.167545303|0.163702570|  
0.049495345|0.068469071|0.044266283|0.057686600|0.063337086|0.053406916|0.042426251|  
0.270365575|0.251190651|0.243767970|0.282713594|0.300545076|0.284292013|0.247519521|  
0.310820112|0.302503658|0.324949756|0.328134159|0.341858795|0.358978898|0.296384557|  
0.912812496|0.918336081|0.906106706|0.928548384|0.934281532|0.929273588|0.900435710|  
0.144069630|0.160775622|0.145237811|0.210680263|0.207186603|0.194212187|0.150561253|  
0.054745876|0.046408408|0.055529821|0.063654148|0.070679127|0.051857431|0.046447766|  
0.112856714|0.111828333|0.119106092|0.103246685|0.119356840|0.129314427|0.096064226|  
0.022983118|0.028928642|0.026177526|0.027453470|0.037023541|0.031103589|0.024478938|  
0.493220253|0.598712876|0.611732270|0.671054964|0.685237638|0.670506025|0.552730705|  
0.731590547|0.778295904|0.789690450|0.774885703|0.820126681|0.845793278|0.733400088|  
0.823222339|0.862420558|0.862302338|0.859793786|0.862235493|0.874030053|0.824656634|  
0.037810649|0.057167619|0.038088066|0.038223946|0.044461973|0.037318457|0.034868212|  
0.038624001|0.061407302|0.041442508|0.049908797|0.037603703|0.053521207|0.040297134|  
0.039126203|0.033622261|0.045578053|0.043790448|0.037738976|0.038799424|0.032509059|  
0.425278131|0.536583756|0.528645607|0.597227409|0.530714715|0.514381192|0.473815055|  
0.045376086|0.064142771|0.045388217|0.061830422|0.074732342|0.059707830|0.045235886|  
0.039905565|0.060557227|0.042185416|0.043476014|0.055441626|0.032021746|0.037193985|  
0.066209567|0.085782348|0.075082622|0.087166092|0.112407380|0.081247427|0.065409278|  
0.051964923|0.051774410|0.053101347|0.054902997|0.074610469|0.072650115|0.045303247|  
0.084130152|0.063873343|0.070601267|0.079889502|0.074688174|0.094855304|0.071345145|  
0.026459555|0.038581593|0.030911674|0.036387012|0.040503978|0.039655524|0.028560619|  
0.068662676|0.059509743|0.070642973|0.083794104|0.083231532|0.081823923|0.068290607|  
0.559468031|0.664728952|0.596975204|0.686041801|0.665713566|0.650142733|0.600502200|  
0.261264558|0.268844226|0.291862120|0.346439293|0.280312203|0.327152701|0.240925352|  
0.058142749|0.063369090|0.052974853|0.073067540|0.080767105|0.078335946|0.059045463|  
0.029602504|0.058193799|0.046186290|0.044393871|0.062093919|0.050514078|0.038717660|  
0.593900896|0.568424024|0.547678847|0.573356778|0.620282204|0.643191575|0.560241715|  
0.046755277|0.031795352|0.041283908|0.042491620|0.034804606|0.036007807|0.035063013|



0.021234873 0.027112724 0.025744509 0.033493496 0.035285770 0.027358413 0.023386378  
0.532601296 0.623542835 0.605029029 0.652097141 0.719845018 0.622555361 0.570422237  
0.879909934 0.901168743 0.884187910 0.919056042 0.929526140 0.925019095 0.881585687  
0.023347917 0.023165785 0.020278341 0.025845849 0.029939978 0.031959410 0.022445436  
0.279893386 0.462336557 0.382303476 0.392061099 0.430013125 0.365947590 0.315558735  
0.352225082 0.441256447 0.365503868 0.463811053 0.510153089 0.414126847 0.355168111  
0.210403039 0.207678018 0.148726553 0.220524488 0.213252487 0.216304770 0.166376991  
0.028956133 0.043646353 0.037372921 0.035266099 0.052543266 0.037549491 0.030486889  
0.064284642 0.063292820 0.070368117 0.070286912 0.061712373 0.080045056 0.058021286  
0.538178241 0.438878928 0.503770489 0.571965469 0.563860012 0.548949587 0.458779420  
0.297292153 0.473854790 0.406714905 0.382822418 0.490619989 0.456007486 0.320919312  
0.283497662 0.398495420 0.165063714 0.218671120 0.315012981 0.286542950 0.196192582  
0.878370931 0.918800561 0.877736054 0.876335376 0.923195413 0.920404792 0.876558417  
0.032494086 0.030539049 0.026510185 0.034251098 0.033869266 0.042754254 0.028492512  
0.405654025 0.413524475 0.422051647 0.421392888 0.464179271 0.457728995 0.396111887  
0.350257337 0.833087783 0.826169634 0.283252595 0.885909226 0.776875530 0.782843329  
0.057824272 0.053692959 0.041389473 0.054070461 0.044158822 0.056400062 0.043613733  
0.050414620 0.046775363 0.027295006 0.053278191 0.038866219 0.039529962 0.033477496  
0.359550512 0.384977970 0.302616834 0.361999163 0.387041192 0.413482501 0.312935797  
0.048672938 0.049875894 0.040021326 0.035943639 0.059655034 0.046780145 0.041046681  
0.034922420 0.029131063 0.023129607 0.034632171 0.023186990 0.030923654 0.026253502  
0.020891508 0.021120600 0.017100140 0.017604420 0.018113766 0.014127226 0.016402353  
0.574360277 0.701277101 0.676827474 0.675677551 0.620250592 0.599585336 0.567080277  
0.056953150 0.075995415 0.053058080 0.065852955 0.069641826 0.048658124 0.049233741  
0.560578132 0.612389063 0.690105460 0.725238009 0.763125719 0.633891174 0.635053429  
0.077847496 0.385220228 0.084406765 0.084661015 0.041516040 0.087389473 0.074847942  
0.047739411 0.033638212 0.041783974 0.040357050 0.038047258 0.059555499 0.037025085  
0.487440296 0.525575469 0.493912870 0.426650588 0.586233703 0.535553632 0.455369862

| mean.DA     | mean.diff        | mean.quot.log2 | max.CONT    | min.CONT    | sd.CONT     |
|-------------|------------------|----------------|-------------|-------------|-------------|
| 0.144950335 | -0.0374815700921 | -0.3995286784  | 0.125082016 | 0.086928838 | 0.011718061 |
| 0.047156393 | -0.015652342332  | -0.4616627206  | 0.035836828 | 0.023696639 | 0.004059744 |
| 0.048516799 | -0.014075139677  | -0.3969381624  | 0.044419514 | 0.025323966 | 0.005632323 |
| 0.050306923 | -0.016688188598  | -0.4673757131  | 0.042192778 | 0.024653864 | 0.005653600 |
| 0.161287081 | -0.052454828431  | -0.5274898855  | 0.125222288 | 0.076028929 | 0.016537006 |
| 0.032259062 | -0.009552074271  | -0.3696618435  | 0.027865381 | 0.018285199 | 0.003654844 |
| 0.031464320 | -0.008025500825  | -0.3103465226  | 0.028518757 | 0.018497334 | 0.003089807 |
| 0.058548430 | -0.013336070950  | -0.3121323793  | 0.052241577 | 0.038146925 | 0.005356260 |
| 0.840871435 | -0.070074195161  | -0.1239932070  | 0.803978279 | 0.709398503 | 0.035595576 |
| 0.031364297 | -0.009562362177  | -0.3792715188  | 0.026455307 | 0.017423157 | 0.002670798 |
| 0.033353922 | -0.009797052417  | -0.3695543732  | 0.029955970 | 0.017635097 | 0.004484138 |
| 0.025573751 | -0.006729571254  | -0.3025328654  | 0.023459128 | 0.014060141 | 0.002690413 |
| 0.047266924 | -0.014605856158  | -0.4247820314  | 0.042656968 | 0.027584617 | 0.004580762 |
| 0.864915402 | -0.050184248491  | -0.0852196203  | 0.867958485 | 0.778433141 | 0.031317660 |
| 0.057373095 | -0.018403647282  | -0.4602906460  | 0.047943018 | 0.028972409 | 0.006530478 |
| 0.025824962 | -0.006240640257  | -0.2761323527  | 0.023697125 | 0.016108906 | 0.002137092 |
| 0.273704021 | -0.074023528159  | -0.4361939476  | 0.284862853 | 0.150983462 | 0.039652915 |
| 0.032394202 | -0.009715191185  | -0.3755026551  | 0.032597118 | 0.018820734 | 0.004166470 |
| 0.155217902 | -0.036940427794  | -0.3651021621  | 0.141144288 | 0.097357489 | 0.015013926 |
| 0.177304680 | -0.068093441381  | -0.6518666941  | 0.166549395 | 0.081032238 | 0.028915287 |
| 0.056327487 | -0.018911195990  | -0.4842240494  | 0.052959594 | 0.025075433 | 0.008991102 |
| 0.672072897 | -0.112395719200  | -0.2597813254  | 0.628102141 | 0.451845343 | 0.056661881 |
| 0.839405758 | -0.057442772949  | -0.1010208856  | 0.857749906 | 0.720065216 | 0.040115700 |
| 0.046086472 | -0.013198109862  | -0.3870666079  | 0.047789021 | 0.025741081 | 0.006275667 |
| 0.049159353 | -0.014739995948  | -0.4134177557  | 0.043203141 | 0.024021189 | 0.006558691 |
| 0.050031930 | -0.018124760005  | -0.5185329507  | 0.040017686 | 0.023977375 | 0.005776082 |
| 0.045488699 | -0.011443718314  | -0.3332163517  | 0.046678667 | 0.027389951 | 0.005774104 |
| 0.613402169 | -0.063560921826  | -0.1551453908  | 0.593548862 | 0.493697646 | 0.033881671 |
| 0.641201824 | -0.103975070480  | -0.2509659759  | 0.663545311 | 0.459641394 | 0.072555223 |
| 0.037829004 | -0.010167481153  | -0.3447944112  | 0.036303320 | 0.024021304 | 0.003805818 |
| 0.033853324 | -0.007641854328  | -0.2762394637  | 0.029744551 | 0.020574125 | 0.002872439 |
| 0.849889262 | 0.051364239200   | 0.0837015734   | 0.924479998 | 0.874072240 | 0.016561030 |
| 0.056928553 | -0.020262384026  | -0.5202447838  | 0.043921766 | 0.029813467 | 0.005274422 |
| 0.525900571 | -0.080900128876  | -0.2360974058  | 0.545196274 | 0.373145776 | 0.057992851 |
| 0.034229994 | -0.011225669580  | -0.4223699700  | 0.030647623 | 0.015921642 | 0.004465557 |
| 0.257744561 | -0.049645375889  | -0.2958728874  | 0.257661824 | 0.182680347 | 0.024496127 |
| 0.045245840 | -0.012770911063  | -0.3792542960  | 0.038173357 | 0.025979129 | 0.004109242 |
| 0.448406588 | -0.088172866525  | -0.3081914733  | 0.411048959 | 0.323477751 | 0.032208148 |
| 0.023676137 | -0.005904469303  | -0.2781128388  | 0.020493173 | 0.012955149 | 0.002255267 |
| 0.044996163 | -0.010943428782  | -0.3200993968  | 0.043711986 | 0.025456862 | 0.005891852 |
| 0.749389352 | -0.070613677214  | -0.1408055773  | 0.731636524 | 0.621051791 | 0.033332967 |
| 0.495550509 | -0.075251984996  | -0.2325173457  | 0.478684606 | 0.344268175 | 0.045427557 |
| 0.115155394 | -0.044610440738  | -0.6358543683  | 0.097302365 | 0.043366693 | 0.017958156 |

0.059393650:0.0354301356745:0.59509055769:0.141638695:0.061588771:0.024999718:  
0.022438495:-0.005470715615:-0.2664701538:0.018846786:0.013527336:0.001659459:  
0.066101906:-0.0159288454414:-0.3388148475:0.059505312:0.042864534:0.005774953:  
0.287329996:-0.046192482348:-0.2435874681:0.266963862:0.208784082:0.023512663:  
0.062748409:-0.014710593888:-0.3259224866:0.059206050:0.039351890:0.006253404:  
0.275051046:-0.090861941097:-0.5537580356:0.253285612:0.114889997:0.044138518:  
0.110121954:-0.026637716963:-0.3617048194:0.098707279:0.070776906:0.010320938:  
0.064100331:-0.017288472306:-0.3832878790:0.059852144:0.038354156:0.006673296:  
0.085725207:-0.020515576938:-0.3479814721:0.083291261:0.043929448:0.010456419:  
0.143200577:-0.044348589854:-0.4930539828:0.126722170:0.061128922:0.018532588:  
0.063985690:-0.023497353400:-0.5512961018:0.056029689:0.030995412:0.007876985:  
0.036868193:-0.010466759187:-0.3646138909:0.034037338:0.016574953:0.005388368:  
0.074447062:-0.0305319175571:-0.6473566498:0.057230271:0.036707855:0.006444104:  
0.040391299:-0.012950839039:-0.4285764811:0.035432377:0.019496234:0.005846851:  
0.409086907:-0.069895717595:-0.2632322911:0.400599267:0.296090872:0.032568564:  
0.030852610:-0.0068072204124:-0.2629688055:0.027368761:0.019155225:0.002410043:  
0.070853265:-0.016078240086:-0.3198683645:0.071380705:0.040329196:0.009937761:  
0.043103569:-0.0141032580354:-0.4453231895:0.039754960:0.024409203:0.004814069:  
0.045271077:-0.011423899834:-0.3340407531:0.039851622:0.026746577:0.004194382:  
0.055311355:-0.015494514290:-0.3907003017:0.056395639:0.029984771:0.007602211:  
0.045232186:-0.0146928553317:-0.4461869547:0.036499864:0.023635108:0.004398232:  
0.020707480:-0.004827667980:-0.2467629792:0.020516913:0.012012635:0.002332309:  
0.045498378:-0.013006014054:-0.3852419998:0.037630432:0.027479393:0.003940664:  
0.059589434:-0.021722540708:-0.5398400904:0.045834070:0.025725865:0.006089407:  
0.040917661:-0.010098791482:-0.3189299134:0.038328986:0.024480376:0.004190308:  
0.041042761:-0.012002719596:-0.3867517784:0.039325831:0.023671953:0.004612967:  
0.055979210:-0.020389044778:-0.5332888625:0.056018957:0.025389655:0.008584486:  
0.043221106:-0.0112223017691:-0.3416502386:0.040950498:0.025290740:0.005248344:  
0.047539740:-0.010929398777:-0.3039086256:0.043290914:0.029074997:0.005004615:  
0.569249005:-0.093137911531:-0.2528976024:0.550013217:0.393658823:0.043992092:  
0.339411657:-0.070055243074:-0.3228207952:0.364757985:0.224556572:0.046104134:  
0.808390876:-0.060422357622:-0.1106521324:0.803604744:0.681447192:0.041237801:  
0.048079695:-0.014087892374:-0.4007991535:0.040433308:0.021302738:0.005323559:  
0.667809846:-0.084707744731:-0.1926001106:0.644710551:0.535838909:0.040579242:  
0.222941343:-0.047637643813:-0.3300750325:0.203656058:0.128681265:0.023364550:  
0.020513672:-0.0048950192964:-0.2522611976:0.021016728:0.013004644:0.002579457:  
0.249487794:-0.069765481074:-0.4517773143:0.214609005:0.142640314:0.024803309:  
0.072171702:-0.0207915387164:-0.4208691631:0.058374631:0.045152283:0.005012700:  
0.049206062:-0.015276092096:-0.4305393834:0.041919684:0.027061222:0.005103540:  
0.333360641:-0.071862975501:-0.3387848804:0.309681320:0.214792429:0.034884483:  
0.456583486:-0.0866359589261:-0.2963350583:0.431448678:0.333657481:0.034653019:  
0.052261056:-0.010596757515:-0.2691623622:0.050529385:0.034333763:0.005681026:  
0.138032049:-0.023621284743:-0.2507982369:0.129201151:0.107862478:0.007425459:  
0.023174998:-0.005230098721:-0.2475113955:0.021985290:0.014471830:0.002405360:

0.057058517 -0.020088558461ε -0.5136822512ε 0.046381559 0.027665348 0.006871125  
0.035474202 -0.010133027688ε -0.3636983402ε 0.031952326 0.017855057 0.004164888  
0.020834887 -0.004565244034ε -0.2311669603ε 0.018750643 0.014105217 0.001423899  
0.526498899 -0.079278177939ε -0.2306844227ε 0.509419790 0.373671120 0.045113393  
0.064861033 -0.019647948741ε -0.439204761110 0.055711277 0.031361934 0.008340142  
0.029237874 -0.007062940204ε -0.286309690210 0.026775816 0.015591973 0.003321544  
0.044215420 -0.014784907162ε -0.4593907587ε 0.037872135 0.022161353 0.005227050  
0.088526843 -0.020228470294ε -0.3315345039ε 0.082503424 0.053348051 0.008681858  
0.852766501 -0.045986651360ε -0.0790228867ε 0.872657134 0.766345168 0.033722331  
0.084716979 -0.019167068777ε -0.3261930247ε 0.079300844 0.051891113 0.010022626  
0.191861647 -0.039016613039ε -0.3098671037ε 0.187593750 0.114193769 0.022934908  
0.049489734 -0.013874167101ε -0.3831144802ε 0.045139877 0.028848051 0.005925022  
0.030189105 -0.0071137659571 -0.2810485000ε 0.028554906 0.018994527 0.002775202  
0.038420107 -0.010784754492ε -0.3635177747ε 0.037746194 0.021996425 0.005071452  
0.110022008 -0.027259836277ε -0.3716904672ε 0.103560754 0.067677994 0.013512423  
0.032942237 -0.009242045643ε -0.3496405641ε 0.031168876 0.017459763 0.004207789  
0.477315733 -0.085966417890ε -0.2799983647ε 0.422713268 0.340115355 0.024856726  
0.019036804 -0.003760742602ε -0.200110992610 0.018329639 0.013174560 0.001669408  
0.037258412 -0.010229296950ε -0.3519110737ε 0.042751669 0.021010854 0.006185550  
0.071610023 -0.019126763689ε -0.3852766338ε 0.068988232 0.041395606 0.009843623  
0.065044264 -0.019340525282ε -0.4299676384ε 0.067216868 0.031945072 0.012745789  
0.035755312 -0.012725854217ε -0.4701859569ε 0.034318346 0.017224424 0.005365174  
0.036109103 -0.010175186906ε -0.359705426510 0.031189005 0.018195786 0.004477491  
0.054052078 -0.013640716264ε -0.3454964442ε 0.059719547 0.028055689 0.009179972  
0.033629321 -0.011698253236ε -0.4503372164ε 0.026671684 0.013419342 0.004183306  
0.127066777 -0.0354906797541 -0.432317975210 0.118854160 0.056517258 0.019081436  
0.075552883 -0.022054618032ε -0.4300992946ε 0.074787795 0.028666251 0.014129901  
0.520084549 -0.078562924853ε -0.2314274065ε 0.504251985 0.386386251 0.036314781  
0.117781518 -0.026615908232ε -0.3369602377ε 0.104919353 0.067834009 0.011059301  
0.032892805 -0.007767884548ε -0.2882407061ε 0.030158899 0.017270300 0.003873235  
0.096160037 -0.043340568360ε -0.7569571241ε 0.063958849 0.036138348 0.009751314  
0.025299586 -0.006635444135ε -0.3004041669ε 0.021550791 0.014841390 0.002332679  
0.462567515 -0.067656789786ε -0.222916602010 0.467249694 0.341015983 0.041133778  
0.028698453 -0.006660600552ε -0.2724984424ε 0.025214959 0.017887288 0.002266466  
0.239137914 -0.050102152964ε -0.3239169227ε 0.242704381 0.157574968 0.024902865  
0.035772957 -0.008567356886ε -0.2989757017ε 0.031823348 0.021477580 0.003277186  
0.072556559 -0.016939845086ε -0.331319493210 0.065381120 0.040398416 0.009542933  
0.036385139 -0.009153900571ε -0.3171490571ε 0.034410782 0.019736373 0.004534283  
0.163053894 -0.061240946132ε -0.6301341409ε 0.158120225 0.057460504 0.034834128  
0.071917382 -0.014591373729ε -0.2830056751ε 0.067518378 0.045908421 0.007186823  
0.024619652 -0.0053572931971 -0.2425451488ε 0.022242093 0.017334064 0.001604526  
0.058665489 -0.015399935738ε -0.3663823375ε 0.059011365 0.030886189 0.008330864  
0.045780312 -0.009968121510ε -0.2840244539ε 0.045542865 0.028879298 0.005679928  
0.666775942 -0.058775676977ε -0.1310708276ε 0.655065198 0.558540560 0.033708684

0.114339867! -0.020166461201! -0.25530191661! 0.102429347! 0.083083256! 0.005786035!  
0.061086804! -0.014734324315! -0.3351026764! 0.056592804! 0.037646691! 0.007094906!  
0.029754331! -0.006750359887! -0.2684724149! 0.028817873! 0.018296996! 0.003225139!  
0.046007344! -0.015850936464! -0.4799858041! 0.039478028! 0.021345460! 0.006207977!  
0.062534713! -0.019269862404! -0.4454877777! 0.063905558! 0.031715204! 0.009717972!  
0.066527371! -0.016492031998! -0.3501638637! 0.060619700! 0.035645104! 0.010832113!  
0.044336804! -0.014064660026! -0.4321474226! 0.039735742! 0.019850583! 0.006491038!  
0.086239323! -0.029096794708! -0.5193996252! 0.082829233! 0.040455922! 0.015523252!  
0.037687755! -0.009110457063! -0.3058667661! 0.036959073! 0.023189594! 0.004956852!  
0.054796030! -0.011786420594! -0.2896515079! 0.051615663! 0.034939511! 0.005346398!  
0.048005737! -0.012409477430! -0.3472801119! 0.043339326! 0.030142962! 0.003827842!  
0.056504459! -0.020512658541! -0.5320743941! 0.055160631! 0.027812165! 0.008808485!  
0.047425350! -0.014100458220! -0.4064915948! 0.045280985! 0.028750621! 0.005866372!  
0.034612771! -0.006435567189! -0.2247453186! 0.033012624! 0.024437091! 0.003094431!  
0.053263355! -0.016372253527! -0.4320558937! 0.051040768! 0.026819261! 0.007797912!  
0.026208715! -0.006275220513! -0.2745762604! 0.024965157! 0.017537858! 0.002673255!  
0.034790886! -0.006690252957! -0.2333902323! 0.031917832! 0.022371222! 0.003236002!  
0.057380101! -0.014492246797! -0.3493861472! 0.055270424! 0.034624401! 0.007409808!  
0.047634707! -0.014065216367! -0.4036195992! 0.045746549! 0.023899305! 0.007075399!  
0.030646087! -0.007776491039! -0.3063627440! 0.027526565! 0.019769344! 0.002623426!  
0.128857293! -0.032191700463! -0.3805080727! 0.113577671! 0.075320302! 0.014986184!  
0.672927868! -0.090140968918! -0.2042196427! 0.653411026! 0.502423134! 0.060852871!  
0.076384180! -0.019811927053! -0.3758461303! 0.067033425! 0.044587429! 0.008055893!  
0.243252425! -0.047511895808! -0.2997500623! 0.257361196! 0.160113597! 0.025695373!  
0.095724447! -0.031729846339! -0.5148171066! 0.078917508! 0.052984052! 0.009561923!  
0.035313963! -0.008579053462! -0.3028039472! 0.032830083! 0.018644274! 0.004760979!  
0.040605177! -0.009382200252! -0.2958362943! 0.037263005! 0.024111424! 0.004489621!  
0.254526630! -0.046641641836! -0.2798461649! 0.256302642! 0.177623946! 0.024461650!  
0.049915275! -0.011424894423! -0.3052252734! 0.047805600! 0.033351001! 0.004632882!  
0.050943915! -0.013736456696! -0.3684673662! 0.046227288! 0.023451930! 0.006769000!  
0.760437371! -0.053434588998! -0.1036989678! 0.750905709! 0.667326967! 0.031383796!  
0.039892013! -0.011311956827! -0.3709536283! 0.039020841! 0.022137217! 0.004755839!  
0.726451195! -0.059051224039! -0.1205819951! 0.716113419! 0.623401756! 0.032799223!  
0.046316563! -0.010700403051! -0.3040142833! 0.039133284! 0.032042741! 0.002433286!  
0.075117274! -0.025277851835! -0.5083557022! 0.065549353! 0.042481604! 0.007548318!  
0.052698597! -0.012869759896! -0.3314522519! 0.046564609! 0.031575416! 0.005342345!  
0.164855169! -0.034038640876! -0.3123437666! 0.159241150! 0.105265392! 0.018874186!  
0.840064007! -0.052101212955! -0.0912499947! 0.847789271! 0.736784359! 0.032646820!  
0.026255602! -0.005387549689! -0.2320894718! 0.023779489! 0.018566978! 0.001644105!  
0.028499842! -0.006914380736! -0.2855918773! 0.025446648! 0.016123732! 0.003167318!  
0.677311556! -0.082868259958! -0.1853572119! 0.693784680! 0.493172478! 0.069015671!  
0.059940150! -0.018106775257! -0.4322395617! 0.052074486! 0.030480493! 0.006930552!  
0.405533115! -0.066128884883! -0.2500663788! 0.395306390! 0.283258496! 0.031283297!  
0.043927341! -0.011106872973! -0.3327163295! 0.039256137! 0.027104976! 0.004078955!

0.043871108;-0.011937667468;-0.3614105328;0.043512136;0.024416908;0.006422316;  
0.473431185;-0.073528267691;-0.2380282829;0.435437609;0.354901396;0.030225313;  
0.053003430;-0.014644464966;-0.3816470005;0.045521624;0.032169375;0.003703114;  
0.114572632;-0.034602970382;-0.4694766448;0.105732555;0.050801524;0.016573518;  
0.026161844;-0.005893523814;-0.2566596314;0.025777480;0.015272562;0.003704795;  
0.065486026;-0.017732654453;-0.3863044249;0.064852234;0.035292845;0.009989344;  
0.039303372;-0.010942970723;-0.3620685071;0.036353338;0.020578176;0.005731786;  
0.037857149;-0.013774963491;-0.4897165967;0.035903515;0.016860826;0.005761785;  
0.042811680;-0.011901170483;-0.3683855252;0.043482208;0.022257590;0.006440987;  
0.031369567;-0.008517341595;-0.3325787494;0.028908285;0.016828302;0.003567174;  
0.049648997;-0.014287889390;-0.3950420043;0.041986627;0.028758577;0.004827651;  
0.890163527;-0.026764042307;-0.0435454305;0.885830896;0.841191859;0.018618570;  
0.053637063;-0.020090264067;-0.5473005741;0.043430593;0.021688522;0.008922605;  
0.045712665;-0.009766708761;-0.2780674328;0.042278635;0.030108804;0.004050080;  
0.032521206;-0.006777860399;-0.2505078351;0.031961663;0.021900097;0.003946221;  
0.241697722;-0.039951522915;-0.2493560854;0.229684277;0.178700188;0.021102082;  
0.048226101;-0.012858593118;-0.3600066025;0.045775377;0.028232555;0.005761655;  
0.067582087;-0.017438603433;-0.3673151506;0.067607162;0.033892220;0.009261851;  
0.035453053;-0.007749891771;-0.2696917034;0.035829952;0.022206303;0.004668029;  
0.047355346;-0.013074173826;-0.3732345510;0.049016531;0.022989183;0.007918815;  
0.083500794;-0.018959859903;-0.3269457167;0.078742636;0.053634512;0.008569430;  
0.073995995;-0.016615967435;-0.3179995213;0.074511412;0.044882439;0.010539067;  
0.400824570;-0.061769796528;-0.2350690253;0.389244844;0.290598403;0.033759621;  
0.080732564;-0.017175278973;-0.3027521943;0.076257475;0.055073770;0.007786500;  
0.226265828;-0.044184002385;-0.2986899609;0.228729779;0.148419124;0.027256978;  
0.034749875;-0.008432292741;-0.3012154849;0.034050546;0.018652602;0.004827771;  
0.035955722;-0.009593672365;-0.3378109737;0.032129696;0.021097640;0.004238021;  
0.110784736;-0.025608324016;-0.3437621718;0.100453581;0.056473897;0.014721384;  
0.037996700;-0.009866349786;-0.3319954350;0.035673406;0.020677831;0.005089182;  
0.037603214;-0.008438666656;-0.2815106924;0.033392511;0.026348078;0.002615563;  
0.019696565;-0.0049826886711;-0.2649747473;0.017623631;0.011953992;0.001987738;  
0.042025013;-0.009255301382;-0.2826159379;0.039965341;0.024390670;0.005026252;  
0.041033044;-0.011768161228;-0.3781921068;0.039339445;0.022059124;0.004505472;  
0.030748210;-0.008186607463;-0.3235649780;0.034018917;0.015902364;0.005989643;  
0.519633481;-0.068446009339;-0.1996410031;0.513157114;0.378425231;0.039013024;  
0.039647365;-0.008963512792;-0.2872608589;0.037141451;0.025851498;0.003480806;  
0.040321518;-0.012367688519;-0.4069299825;0.036227618;0.021470258;0.004738648;  
0.035442182;-0.009732178226;-0.3477038204;0.039176878;0.020116049;0.005685821;  
0.432829053;-0.099171658881;-0.3657788758;0.396307172;0.288243647;0.039478157;  
0.040535473;-0.016270992944;-0.5605826307;0.030564125;0.016928192;0.004989708;  
0.027828576;-0.006141040870;-0.2555610259;0.027513338;0.018275248;0.002847324;  
0.172765998;-0.047217933856;-0.4311931853;0.157068008;0.065871810;0.029105336;  
0.047609075;-0.010728004981;-0.2972905931;0.042538659;0.030845058;0.003760191;  
0.077885737;-0.023854565645;-0.4568546413;0.074056682;0.043962294;0.009258374;

0.024755366! -0.005842473139! -0.2655227659! 0.023238602! 0.015306715! 0.002465691!  
0.026693239! -0.007030319280! -0.3068536503! 0.028112054! 0.014453642! 0.004547395!  
0.145683214! -0.032744280254! -0.3406715208! 0.146505678! 0.083817582! 0.021942023!  
0.037989845! -0.007172402212! -0.2335433480! 0.039709955! 0.023915408! 0.004551649!  
0.332246334! -0.052009065272! -0.2378023033! 0.344000241! 0.227333207! 0.035215037!  
0.116860964! -0.022411911703! -0.2804488064! 0.112178338! 0.074956563! 0.013320253!  
0.074549140! -0.014878070561! -0.2792303683! 0.077900497! 0.045917714! 0.010292212!  
0.150239836! -0.044085653443! -0.4641917428! 0.137419442! 0.081286186! 0.019901142!  
0.296556502! -0.049269029071! -0.2527717880! 0.283354931! 0.203257575! 0.021757075!  
0.094658329! -0.034530533209! -0.5776288398! 0.086194516! 0.028839687! 0.019172657!  
0.219531790! -0.051611207751! -0.3674605645! 0.202328973! 0.122809505! 0.024569620!  
0.049576853! -0.021864092036! -0.6596991415! 0.045087717! 0.019823322! 0.008180421!  
0.292481928! -0.045101845263! -0.2329485344! 0.315890772! 0.224574594! 0.029010528!  
0.038865085! -0.009590206097! -0.3151971685! 0.035801732! 0.020228994! 0.005679941!  
0.070923309! -0.014557253361! -0.2861097796! 0.065433971! 0.047529344! 0.005805195!  
0.661901128! -0.059923305941! -0.1347695812! 0.673830032! 0.581830164! 0.029060882!  
0.022960285! -0.004725607987! -0.2232605821! 0.021813112! 0.015139583! 0.002244269!  
0.043425250! -0.009600186545! -0.2857655710! 0.038117400! 0.026437746! 0.003816332!  
0.022246506! -0.004925612296! -0.2391381695! 0.019823577! 0.014612273! 0.001823872!  
0.817846336! -0.095658356558! -0.1771489122! 0.801084764! 0.516763673! 0.097012860!  
0.083313671! -0.017595848368! -0.3014555344! 0.075111769! 0.053364194! 0.007143701!  
0.044792340! -0.009781094208! -0.2836887179! 0.040503077! 0.031359949! 0.003137409!  
0.049970945! -0.010594070622! -0.2804281888! 0.042639171! 0.034486529! 0.002667190!  
0.070113989! -0.013898132522! -0.2748774412! 0.064825799! 0.042100646! 0.007725876!  
0.397990012! -0.063810278457! -0.2453716844! 0.390092796! 0.298330853! 0.029773239!  
0.049725880! -0.009820918133! -0.2591729396! 0.046708630! 0.028923743! 0.006182792!  
0.054784430! -0.014113562430! -0.3544905924! 0.047838252! 0.033711829! 0.005029221!  
0.802783289! -0.140257638245! -0.2732814456! 0.822325816! 0.379877583! 0.157303636!  
0.863666261! -0.045661399306! -0.0774430392! 0.865131970! 0.765260532! 0.034801591!  
0.034526933! -0.007867661345! -0.2805001148! 0.034887776! 0.021787562! 0.003790744!  
0.047693693! 0.023780402608! 0.49792781746! 0.110684315! 0.044116310! 0.020687617!  
0.174501208! -0.045948378989! -0.4131940919! 0.161717152! 0.103603119! 0.017147260!  
0.443819863! -0.057019987322! -0.1937081810! 0.416326230! 0.357847315! 0.023647939!  
0.063518737! -0.015975125677! -0.3534562126! 0.059930608! 0.035042050! 0.009113026!  
0.783247122! -0.072667337476! -0.1386122034! 0.761553798! 0.631868212! 0.048257527!  
0.041983374! -0.012465019660! -0.3955273974! 0.039026081! 0.024425596! 0.004889107!  
0.075661997! -0.016384038409! -0.3062588883! 0.075442706! 0.052843733! 0.009031636!  
0.076645434! -0.016405484006! -0.3028319052! 0.071101239! 0.049491852! 0.006292936!  
0.723223555! -0.082566240623! -0.1723552230! 0.720727591! 0.474393541! 0.076252589!  
0.105898773! -0.041353750772! -0.6366813644! 0.080330002! 0.052911305! 0.007634645!  
0.054054358! -0.014372341391! -0.3665729933! 0.051082952! 0.027755128! 0.008178034!  
0.073215866! -0.020581526531! -0.4099047802! 0.067725871! 0.032527315! 0.011411063!  
0.032006127! -0.007575525337! -0.2869083775! 0.031181261! 0.019704313! 0.003419732!  
0.749269334! -0.053556929925! -0.1055313725! 0.739964505! 0.640411323! 0.035812918!

0.118296718|0.0718623871527|0.64166297726|0.347678533|0.122519486|0.077160581|  
0.099910462|-0.039432812209|-0.6410909943|0.070061247|0.042583141|0.008092615|  
0.159722958|-0.032765623560|-0.3094551978|0.146271556|0.103566413|0.015626496|  
0.060377911|-0.014890760137|-0.3429689620|0.054824055|0.037097450|0.004844679|  
0.441140702|-0.098465777809|-0.3552384505|0.423247068|0.263324512|0.050477491|  
0.632607068|-0.054009494852|-0.1266552550|0.623042943|0.540493873|0.023815848|  
0.082219619|-0.029940561535|-0.5663265893|0.076852229|0.033512900|0.013161581|  
0.818219479|-0.053521036291|-0.0963782944|0.822594584|0.731057063|0.029105970|  
0.050333246|-0.013862378922|-0.3766266380|0.044641141|0.028542350|0.005719802|  
0.149487848|-0.023385917474|-0.2287589724|0.148785036|0.107864821|0.012421475|  
0.041683931|-0.010903215403|-0.3418287069|0.038789818|0.021015215|0.005890983|  
0.646888278|-0.103218437168|-0.2466220825|0.640438309|0.428943388|0.085287871|  
0.050042436|-0.013120446713|-0.3557183274|0.045991333|0.029040620|0.006250464|  
0.033513712|-0.008619285127|-0.3184734491|0.030150711|0.019169522|0.004081434|  
0.022272844|-0.004543060484|-0.2188843652|0.022403792|0.014009081|0.002321049|  
0.815598741|-0.072764004432|-0.1331075736|0.813133682|0.582105090|0.069645608|  
0.014767689|-0.002791918574|-0.1725455103|0.015262892|0.010112724|0.001790931|  
0.329214216|-0.050044895956|-0.2302821373|0.319111912|0.236099078|0.026082746|  
0.785713317|-0.055342428632|-0.1040005748|0.796005660|0.681868711|0.039624560|  
0.052875334|-0.013875526139|-0.3597180632|0.052860889|0.023982146|0.008640616|  
0.284023255|-0.069706909092|-0.3903955120|0.312352360|0.162437730|0.051958291|  
0.043896914|-0.012512790049|-0.3811252461|0.043286815|0.021874029|0.006691575|  
0.020710868|-0.004957958344|-0.2540138396|0.019533271|0.013179219|0.002325223|  
0.085006120|-0.022802528543|-0.3959498461|0.072722914|0.045339488|0.008456057|  
0.060611057|-0.013346316474|-0.3022470067|0.054579518|0.038507779|0.005421629|  
0.124714345|-0.051671533190|-0.6979762812|0.139853079|0.040966975|0.031114861|  
0.613107976|0.2048143855770|0.41001330108|0.874656867|0.780345639|0.029900219|  
0.024726588|-0.005771104610|-0.2622040805|0.023422596|0.015315675|0.002623534|  
0.214074418|0.0912167903735|0.49270699274|0.411314600|0.197038581|0.067172172|  
0.078857336|-0.022583975376|-0.4230618095|0.073446495|0.045292362|0.008870042|  
0.095269209|-0.017234810655|-0.2579442577|0.089613314|0.061658678|0.008205272|  
0.072145360|-0.020759659723|-0.4202764613|0.061611034|0.036432891|0.009151329|  
0.035567092|-0.008259848078|-0.2885365120|0.036514480|0.020447404|0.005081991|  
0.059353942|-0.014230056487|-0.3313003026|0.051467765|0.036373089|0.005199430|  
0.056600894|-0.011435106996|-0.2717677345|0.057916608|0.036945248|0.005725258|  
0.781196138|-0.073022863507|-0.1397034171|0.794153461|0.642649910|0.051503478|  
0.047042507|-0.010916715088|-0.3064637038|0.045469504|0.031073111|0.004607668|  
0.201563086|-0.051439841314|-0.4019051685|0.195530767|0.104743403|0.036447880|  
0.072276148|-0.024549872045|-0.5112460938|0.066356783|0.038681883|0.009283270|  
0.062669772|-0.015454930548|-0.3449659498|0.055776792|0.039928565|0.005651479|  
0.033816384|-0.011252538000|-0.4281993199|0.025972257|0.011761268|0.004346916|  
0.365616222|-0.048334077439|-0.1987244751|0.373120160|0.279099764|0.030074613|  
0.034883100|-0.007326663004|-0.2571121214|0.030925149|0.021906079|0.002857344|  
0.038219936|-0.014614369212|-0.5209294994|0.031070525|0.015736696|0.005105005|



0.032925271;-0.008934994674;-0.3367051491;0.030328329;0.019214234;0.004519533  
0.142058012;-0.025326709855;-0.2628489241;0.145833604;0.104095937;0.012175558  
0.559824198;-0.058975777893;-0.1576216123;0.529920847;0.463730553;0.020250318;  
0.021110913;-0.004858078680;-0.2449475400;0.018811708;0.014721494;0.001555928;  
0.518842184;-0.068440512628;-0.1999441896;0.507110114;0.396096322;0.032546717;  
0.042296588;-0.010574781167;-0.3259151820;0.044260491;0.022490028;0.007990278;  
0.081019241;-0.024022104300;-0.4420721141;0.067673771;0.048336315;0.007259957;  
0.062140848;-0.021465439976;-0.5095305795;0.053375819;0.032647574;0.006867940;  
0.458254234;-0.066623535767;-0.2214224947;0.447479596;0.331346349;0.043559475;  
0.052815306;-0.0098447449211;-0.2459253464;0.048536072;0.034904398;0.004201976;  
0.069323551;-0.013424734176;-0.2674966979;0.065492426;0.047599071;0.005023446;  
0.033016557;-0.008478804145;-0.3167178371;0.033012461;0.018458398;0.004895393;  
0.356795653;-0.0589122946031;-0.2525926512;0.346852793;0.259781521;0.029272404;  
0.035309522;-0.009918182168;-0.3564178868;0.036048291;0.019918102;0.004773627;  
0.103390530;-0.0388434800041;-0.6050769860;0.086505430;0.049169092;0.012676353;  
0.358156141;-0.043213797689;-0.1801340121;0.345774399;0.293063046;0.017455668;  
0.025241892;-0.005497063394;-0.2446525075;0.023222690;0.015506085;0.002605591;  
0.157755626;-0.031766123752;-0.3028658634;0.141841504;0.096217527;0.014806248;  
0.024689378;-0.006290874285;-0.2886790521;0.028244858;0.013198154;0.004251758;  
0.046323463;-0.010481259431;-0.2970596425;0.043611388;0.028247227;0.005148572;  
0.065401243;-0.014410540684;-0.3059989740;0.062373346;0.040179725;0.006461499;  
0.097890805;-0.030633472187;-0.4818281355;0.093318275;0.054343363;0.012916947;  
0.044443305;-0.012164543783;-0.3648215380;0.041507936;0.022705286;0.005730817;  
0.506520349;-0.106900070812;-0.3345380491;0.520570950;0.323023196;0.064568664;  
0.061454006;-0.014020065716;-0.3151113522;0.057094936;0.039627531;0.005998169;  
0.807590424;-0.050502887825;-0.0919870785;0.823494762;0.692305810;0.037555233;  
0.077145755;-0.024412334370;-0.4741961560;0.064795051;0.036215053;0.008772912;  
0.056922673;-0.018585690132;-0.4693676430;0.059734362;0.031229681;0.008907293;  
0.403700916;-0.053982700381;-0.2017209341;0.405665700;0.296782676;0.036913796;  
0.183475076;-0.0578292249761;-0.5123028040;0.168540886;0.088399671;0.026855791;  
0.055034591;-0.010541752959;-0.2551406419;0.050791554;0.037566763;0.005021016;  
0.034281569;-0.010362303653;-0.3846014164;0.029024868;0.018829514;0.003853282;  
0.055867695;-0.010334885266;-0.2462306705;0.052819374;0.040163661;0.003969459;  
0.043375453;-0.011674548513;-0.3560977288;0.039274983;0.020717938;0.005846453;  
0.058070807;-0.012496063525;-0.2926068276;0.053242924;0.035701271;0.006269576;  
0.067563803;-0.013182921280;-0.2687512041;0.069515222;0.046712668;0.007757285;  
0.046595434;-0.009974088362;-0.2796950146;0.041461530;0.030556037;0.003895895;  
0.033129095;-0.008524896011;-0.3177143259;0.030613124;0.017645539;0.004841093;  
0.187995277;-0.032792438754;-0.2612275424;0.175228456;0.132659598;0.014783140;  
0.039373886;-0.010058525533;-0.3286551145;0.034242178;0.022900824;0.004211878;  
0.143048152;-0.025228957880;-0.2598811278;0.139124193;0.095510968;0.014418750;  
0.034788499;-0.007842855648;-0.2777240613;0.035575812;0.019859154;0.005410859;  
0.043055295;-0.0130191389721;-0.4061932763;0.045456886;0.022890286;0.007313364;  
0.028882948;-0.006697158186;-0.2727137289;0.025288430;0.018253191;0.002717449;

0.029782170;-0.006713932261;-0.2666758055;0.027639393;0.017242831;0.003673116;  
0.042442180;-0.012864735176;-0.4060491772;0.042575364;0.022681706;0.005502450;  
0.041194081;-0.008479947662;-0.2612635057;0.040873148;0.023190861;0.004807495;  
0.049602671;-0.013762370299;-0.3787604702;0.043324777;0.029127683;0.005373203;  
0.428062636;-0.063000405010;-0.2240071765;0.451919277;0.321446881;0.039253883;  
0.041880299;-0.008803170811;-0.2682647206;0.039201048;0.028237768;0.004120552;  
0.117200584;-0.040704553920;-0.5563994652;0.111195981;0.046030140;0.022039793;  
0.071965986;-0.027263790252;-0.5834265974;0.055745604;0.035448600;0.006100174;  
0.052283321;-0.012462656529;-0.3221016061;0.048322083;0.028419304;0.006171280;  
0.782471900;-0.045233568770;-0.0847913169;0.784492670;0.690173396;0.031798372;  
0.546862260;-0.066904784979;-0.1846639819;0.524886901;0.397346423;0.043798374;  
0.033418757;-0.008218305719;-0.3027244954;0.033892164;0.017966191;0.004659944;  
0.050027093;-0.009232087848;-0.2409271610;0.047886752;0.034345668;0.005140444;  
0.338777805;-0.061087511614;-0.2777916890;0.323704972;0.229670722;0.027305165;  
0.059142486;-0.011280905383;-0.2569667400;0.056601723;0.037702419;0.005331241;  
0.228835642;-0.042005972656;-0.2790704449;0.207977116;0.134893253;0.021851436;  
0.041199074;-0.012416120956;-0.4006950566;0.037859638;0.023028966;0.005025851;  
0.038005041;-0.010579540128;-0.3591642835;0.035635355;0.020180255;0.005180236;  
0.093300573;-0.018176830806;-0.2792147750;0.098541013;0.056364215;0.012594434;  
0.029224456;-0.006930048247;-0.2804690704;0.025217050;0.016902435;0.003028162;  
0.293830876;-0.041199485006;-0.2102291225;0.314069061;0.214080766;0.030353335;  
0.073050237;-0.013952387833;-0.2653434801;0.072302262;0.047741436;0.009321729;  
0.047141180;-0.011469348678;-0.3232261852;0.051111085;0.022468738;0.008970909;  
0.030740074;-0.009342207028;-0.3757820401;0.025286066;0.017066501;0.002734949;  
0.106438556;-0.021275705305;-0.29109845771;0.095245802;0.071646052;0.008605088;  
0.464345705;-0.083111991844;-0.2779081891;0.436478172;0.325736770;0.041509342;  
0.044273048;-0.012566013991;-0.3799452124;0.040464020;0.024361677;0.004560126;  
0.020602394;-0.004602434937;-0.2351351582;0.020814334;0.012592079;0.002436048;  
0.834471092;-0.054156749578;-0.0956214473;0.856589465;0.720330825;0.041296579;  
0.028898223;-0.006251925903;-0.2527848814;0.028603946;0.017492774;0.003202974;  
0.066138171;-0.026323472817;-0.6120484226;0.051779750;0.033002564;0.005804793;  
0.018412753;-0.004045902259;-0.2216188147;0.018152241;0.010389390;0.002671722;  
0.086907442;-0.029467409901;-0.5230022333;0.079742525;0.038050873;0.016807487;  
0.048079937;-0.013297473191;-0.3751059835;0.045800077;0.024722755;0.008336819;  
0.045434926;-0.010197288236;-0.2932716109;0.043398867;0.030755965;0.004961363;  
0.062629723;-0.011371688437;-0.2456609952;0.057174547;0.042425106;0.004571925;  
0.312742510;-0.041042871049;-0.1962259000;0.316016637;0.239141535;0.023848226;  
0.055507819;-0.014091540616;-0.3494419252;0.063974927;0.028829225;0.010020899;  
0.052294991;-0.011530461111;-0.2952953508;0.049770005;0.033686100;0.004403982;  
0.880942036;-0.037886570062;-0.0626920250;0.906258276;0.815166296;0.027613996;  
0.418547595;-0.057445339211;-0.2076386695;0.418881282;0.326293476;0.034865514;  
0.033143439;-0.007860856129;-0.2901849965;0.035451093;0.021152869;0.004160592;  
0.035587148;-0.009546548280;-0.3390041314;0.032599698;0.019355080;0.004464158;  
0.034270908;-0.008584152493;-0.3109702131;0.033039961;0.019350897;0.004507762;

0.022319929! -0.004408627081! -0.2115746043! 0.021964432! 0.013456099! 0.002742207!  
0.790299594! -0.049978925061! -0.0930328767! 0.792810458! 0.711748134! 0.026195353!  
0.046187398! -0.010488913240! -0.2981002610! 0.042568168! 0.028172303! 0.004851986!  
0.549513709! -0.068162924125! -0.1874201194! 0.552478949! 0.397124998! 0.050798160!  
0.433119300! -0.066950154454! -0.2363136446! 0.433032159! 0.281895721! 0.047068024!  
0.351814919! -0.041837872834! -0.1772834810! 0.335811537! 0.294533699! 0.011348860!  
0.063285220! -0.022333431115! -0.5243894665! 0.058949863! 0.029669967! 0.009521210!  
0.043449543! -0.009114780286! -0.2697392584! 0.045893054! 0.025500996! 0.005949183!  
0.335540991! -0.074642520721! -0.3511046185! 0.341376778! 0.201397905! 0.047101258!  
0.377078392! -0.072311303046! -0.2983410680! 0.398807229! 0.222638937! 0.049990320!  
0.867549225! -0.041544648783! -0.0699692142! 0.858473965! 0.790309117! 0.024855305!  
0.242073434! -0.038880920389! -0.2416873027! 0.240226768! 0.165196796! 0.023222564!  
0.439910012! -0.071028272425! -0.2478888615! 0.434082897! 0.287303978! 0.046933957!  
0.115018784! -0.033501021974! -0.4500211946! 0.103429560! 0.053129417! 0.016900485!  
0.399085570! -0.052223660079! -0.1970367264! 0.381804637! 0.314672339! 0.021487717!  
0.029946641! -0.006594473255! -0.2602936582! 0.032654924! 0.019319664! 0.003845205!  
0.030482619! -0.007612092937! -0.3005080758! 0.030585532! 0.016714941! 0.003888460!  
0.154129242! -0.044160097683! -0.4521688990! 0.183589118! 0.078743298! 0.031561786!  
0.039309118! -0.008178495507! -0.2616415400! 0.038528273! 0.023488232! 0.005144040!  
0.641043719! -0.068242875094! -0.1597514602! 0.657507569! 0.522476897! 0.042491938!  
0.070028901! -0.025271719738! -0.5474729081! 0.064185399! 0.032845117! 0.010362135!  
0.697402042! -0.076424128560! -0.1649408770! 0.667561522! 0.591187836! 0.028652746!  
0.041523103! -0.009463608848! -0.2927879810! 0.038251407! 0.026638019! 0.004203783!  
0.034202302! -0.010074180073! -0.3731604791! 0.031596180! 0.017903593! 0.004163614!  
0.070501490! -0.014220895535! -0.2804289406! 0.070880526! 0.040495636! 0.010422376!  
0.658554512! -0.079257131028! -0.1820493438! 0.676478809! 0.483533242! 0.058010862!  
0.126072696! -0.025207360897! -0.2955692659! 0.112743618! 0.089034325! 0.008839405!  
0.026123874! -0.007706607808! -0.3461848388! 0.024127758! 0.011333777! 0.004024400!  
0.276761354! -0.035107683595! -0.1884109689! 0.265936350! 0.203468851! 0.019215448!  
0.312689148! -0.046585144939! -0.2249332558! 0.310310694! 0.232811097! 0.028182842!  
0.052560391! -0.011697703729! -0.2986418383! 0.054347058! 0.028859832! 0.009148415!  
0.065426480! 0.017223656590! 0.29672200134! 0.110843554! 0.061536604! 0.014630060!  
0.029775641! -0.006657194137! -0.2642501614! 0.030385586! 0.015881417! 0.004855779!  
0.036193402! -0.008648318579! -0.2990627990! 0.033774368! 0.023668748! 0.003548313!  
0.051331693! -0.009369925858! -0.2391822769! 0.053281259! 0.034829320! 0.006490102!  
0.306063544! -0.049181174632! -0.2440106363! 0.300711134! 0.218375703! 0.023479344!  
0.057259449! -0.017028031538! -0.4211469693! 0.052203966! 0.029157876! 0.007547975!  
0.032860774! -0.006791636347! -0.2488929708! 0.034911654! 0.022428306! 0.003803676!  
0.801461637! -0.046612576052! -0.0853478234! 0.819763523! 0.697188542! 0.039677240!  
0.025190823! -0.006019022520! -0.2706248159! 0.025110420! 0.016382624! 0.002834500!  
0.033670232! -0.007430398251! -0.2690738526! 0.031190391! 0.020925767! 0.003785828!  
0.040806836! -0.009690900267! -0.3053249569! 0.038905938! 0.023997495! 0.005684622!  
0.044010206! -0.008276997054! -0.2399898957! 0.042661487! 0.030905170! 0.004019513!  
0.047822515! -0.012500160989! -0.3514085619! 0.045610218! 0.027115619! 0.007385126!

0.812166059! -0.056785124244€ -0.1032518504€ 0.819192342 0.629586274! 0.054138116!  
0.049482561! -0.011777093433! -0.3183121333€ 0.045850796! 0.026355912! 0.006446055!  
0.048561068! -0.014926242203€ -0.4244618231€ 0.046034075! 0.023503394! 0.007116052!  
0.348954593! -0.038093887736€ -0.1618542390€ 0.350327850 0.264451135! 0.024077421!  
0.851671101! -0.035715693304€ -0.0610734046€ 0.861153535! 0.762119621! 0.031429745!  
0.297336211! -0.038127812299! -0.1910943381! 0.302645984 0.237248053! 0.024303124!  
0.051699932! -0.014280488409€ -0.3797901580€ 0.049141990! 0.031264500! 0.005405105!  
0.053322110! -0.019523285280€ -0.5318171656€ 0.051354025! 0.024716717! 0.008338059!  
0.109189179! -0.040513949476€ -0.5992718738€ 0.110956978! 0.044318973! 0.022081996!  
0.046048878! -0.010652373348€ -0.3041042684€ 0.045170129! 0.027604573! 0.005227274!  
0.425920968! -0.053360927596€ -0.1883804119€ 0.453827291! 0.320781243! 0.042643458!  
0.481935835! -0.057394104996€ -0.1789754228€ 0.475995581! 0.373090225! 0.034109351!  
0.155534661! -0.039693688954€ -0.3955316108€ 0.145402889 0.090403208! 0.020340307!  
0.035000837! -0.009633007137€ -0.3475141339€ 0.035589157! 0.020817894! 0.004617447!  
0.033909551! -0.007565960190€ -0.2728338139€ 0.032397220! 0.017186739! 0.004350036!  
0.025811263! -0.004995001478€ -0.2167215449€ 0.026229974! 0.017034431! 0.002725044!  
0.026535281! -0.005914950911€ -0.2548004681€ 0.027602409! 0.016252399! 0.003313703!  
0.037246333! -0.009530194549€ -0.3250203801€ 0.034562890! 0.019266574! 0.004977435!  
0.029061266! -0.005018343309€ -0.1983838054€ 0.028723783! 0.018268441! 0.002958916!  
0.112109872! -0.046510067117€ -0.6917254238€ 0.103089163! 0.029216860! 0.022417694!  
0.083512053! -0.025964864865€ -0.4692566104€ 0.068305904! 0.042562298! 0.009229237!  
0.031034283! -0.006950084396€ -0.2677266773€ 0.028311118! 0.019453146! 0.003354382!  
0.036817305! -0.009847289683€ -0.3406862461€ 0.034476234! 0.018009430! 0.006208298!  
0.025227291! -0.007401947971€ -0.3402940563€ 0.022825023! 0.014243362! 0.002992702!  
0.076954567! -0.024321168054€ -0.4733296291€ 0.059855836! 0.041524131! 0.007307985!  
0.075093659! -0.018634572607€ -0.3565851686€ 0.070100978! 0.040504275! 0.009773979!  
0.257531348! -0.191334202890€ ##### 0.098832231! 0.033316559! 0.021255053!  
0.030359269! -0.006283781418€ -0.2441657407! 0.031872593! 0.017470133! 0.004532226!  
0.781547370! -0.047062363862! -0.0884328973! 0.770800045! 0.699015182! 0.020923501!  
0.067112110! -0.013034318743€ -0.2671330221€ 0.066521633! 0.046907232! 0.006209032!  
0.044955211! -0.014085048315€ -0.4272083012€ 0.045122197! 0.018879589! 0.007337522!  
0.039542810! -0.009586646144€ -0.3102576153€ 0.044740535! 0.019315137! 0.007028205!  
0.126204572! -0.031436056549! -0.3785699008€ 0.123563897! 0.073969804! 0.015528619!  
0.037315923! -0.007831684070€ -0.2610488834€ 0.034531612! 0.025415780! 0.003199501!  
0.031362128! -0.005395757336€ -0.2016618235€ 0.028693925! 0.020574916! 0.002422962!  
0.092000802! -0.020101566014€ -0.3166585945€ 0.090695161! 0.061667184! 0.010878316!  
0.314861749! -0.042540786141! -0.2024896268€ 0.295108678! 0.232266894! 0.018379739!  
0.428412055! -0.050493490025€ -0.1765336466€ 0.413713535! 0.337504019! 0.030132603!  
0.305388240! -0.065756829735€ -0.3373293917€ 0.292902628! 0.195762876! 0.028397310!  
0.018172654! -0.003303180149! -0.1799194910! 0.018174186! 0.012809602! 0.001749315!  
0.340679625! -0.067727623128€ -0.3095962657€ 0.341012949! 0.164417427! 0.052614653!  
0.096627928! -0.013428530310€ -0.1941928204! 0.088735028! 0.072228125! 0.004910189!  
0.298414967! -0.059031892660€ -0.3065092263€ 0.284828411! 0.204421090! 0.030127799!  
0.878905291! -0.037953858576€ -0.0629529210€ 0.893084143! 0.796094632! 0.032083226!

0.670175329 -0.0488462408495 -0.10751445407 0.667080313 0.584153999 0.031423014  
0.048049119 -0.012759874215 -0.35810568575 0.047387924 0.027519108 0.007218935  
0.033333882 -0.0089344816476 -0.33311206685 0.029847376 0.017299217 0.004710499  
0.594649141 -0.0812652439637 -0.20822869654 0.579571509 0.397376093 0.051169307  
0.035632061 -0.0071398650855 -0.24548183772 0.032206031 0.023702227 0.002391119  
0.712117715 -0.1007774558967 -0.21685049981 0.693278120 0.524990007 0.059991442  
0.167418830 -0.0556953188555 -0.54355127916 0.156618278 0.083749758 0.025557381  
0.908378365 -0.0234923165112 -0.03738466904 0.918057250 0.860742694 0.016065333  
0.528818524 -0.0756400196685 -0.21823114887 0.523421582 0.358861929 0.062568120  
0.570716304 -0.0514114264476 -0.13373459062 0.583111489 0.484234553 0.034354535  
0.288507644 -0.0570821796745 -0.30619002281 0.286817573 0.187520352 0.032387541  
0.697079908 -0.0646431479472 -0.13831881912 0.682409829 0.564075190 0.039708225  
0.038899753 -0.0094276835392 -0.30899501147 0.040974484 0.024107696 0.005774618  
0.031719628 -0.0065666195588 -0.24707812894 0.030491313 0.020756086 0.003199723  
0.912949397 -0.0212622658796 -0.03362461905 0.913142643 0.868559120 0.014250713  
0.060351876 -0.0169955112976 -0.39892851491 0.050649376 0.037535669 0.005208153  
0.043338546 -0.0090581945385 -0.26851182426 0.042387424 0.029068532 0.004869147  
0.377443454 -0.0494498779016 -0.19698994252 0.381519693 0.290914413 0.031636813  
0.036392983 -0.0074841351198 -0.25380834667 0.035791759 0.022906058 0.004472589  
0.047229051 -0.0099101902636 -0.27433233906 0.043383760 0.030668825 0.004243291  
0.331992561 -0.0447210559655 -0.20218376355 0.350597715 0.257875854 0.034123055  
0.134800284 0.0844427598929 0.66281352489 0.368779357 0.099110026 0.072953024  
0.079080169 -0.0250382671647 -0.47608814176 0.079000896 0.037309707 0.013674719  
0.037572415 -0.0073788718295 -0.24316150127 0.039044671 0.022038715 0.005893985  
0.018436536 -0.0030248505142 -0.16225366276 0.018742433 0.012792059 0.001989349  
0.024524223 -0.0046664454968 -0.20950216226 0.023850225 0.017051968 0.002370574  
0.035855275 -0.0093771695057 -0.33005689932 0.036159571 0.016721175 0.006671954  
0.036700802 -0.0076522726887 -0.25817910752 0.035875213 0.022535443 0.004760653  
0.908053480 -0.0287178203766 -0.04585016391 0.918404005 0.835464111 0.025513928  
0.028434901 -0.0044782766506 -0.17872390117 0.028874672 0.020717372 0.002804375  
0.913562441 -0.0178988964686 -0.02823431718 0.917363341 0.877976236 0.013860352  
0.864252099 -0.0354074191615 -0.05964564811 0.881697790 0.786642103 0.026441531  
0.308573901 -0.0501995245425 -0.24738114497 0.309795000 0.207005223 0.029080019  
0.117203230 -0.0380156006374 -0.51221978007 0.107280076 0.062118586 0.017505071  
0.254858680 -0.0388171633575 -0.22863501465 0.278039889 0.183072201 0.029718317  
0.545867694 -0.0601739323025 -0.16529243496 0.584402751 0.392233849 0.053978602  
0.064576303 -0.0142552400417 -0.30605542567 0.060466724 0.040000226 0.006445932  
0.130670889 -0.0189040645406 -0.20820267855 0.127069064 0.096490764 0.008806285  
0.887087049 -0.0438582828866 -0.07231537791 0.912817431 0.800864948 0.039084841  
0.340924753 -0.0514016434435 -0.22849439591 0.336965674 0.213995574 0.044089330  
0.025238546 -0.0052977089615 -0.23503984015 0.026314094 0.015433374 0.003449310  
0.043565057 -0.0086889241644 -0.25534380936 0.045197357 0.027866892 0.006003724  
0.021715531 -0.0042621461202 -0.20820545281 0.022055599 0.012992369 0.002681530  
0.550159344 -0.0683140507702 -0.18763268071 0.547717955 0.437824038 0.041579832

0.022655503;-0.004203490005;-0.1987954010;0.023813561;0.014725371;0.002949564;  
0.037841142;-0.007540187950;-0.2474378347;0.034702091;0.023250420;0.003913284;  
0.552062834;-0.059710715475;-0.1620324599;0.567369745;0.442695796;0.042524333;  
0.073241678;-0.016442897795;-0.3174842869;0.079267816;0.042497266;0.010304265;  
0.028005740;-0.005119442613;-0.2087307323;0.025364232;0.018203343;0.002296235;  
0.864309594;-0.042831002626;-0.0724651121;0.870557819;0.785183161;0.027852096;  
0.191175268;-0.035755431544;-0.2823207067;0.217018258;0.127683566;0.030021406;  
0.037480105;-0.007720717895;-0.2560276026;0.032311717;0.026506560;0.001762386;  
0.034310739;-0.006651927674;-0.2346689244;0.038340406;0.023042166;0.004899905;  
0.276850141;-0.035507983292;-0.1906445514;0.269616388;0.203589174;0.026325387;  
0.029073781;-0.004967966054;-0.1961831267;0.030127682;0.020404886;0.003069929;  
0.030986917;-0.008307264088;-0.3267708139;0.030898443;0.018167486;0.004142980;  
0.164522504;-0.044316358965;-0.4226155395;0.139686335;0.105875480;0.012489200;  
0.050466031;-0.009200725219;-0.2381420817;0.052402091;0.029223360;0.007604356;  
0.027985164;-0.008660522442;-0.3733225733;0.022897365;0.015720211;0.002486483;  
0.034766534;-0.007306836309;-0.2570813658;0.031619792;0.021831140;0.003345216;  
0.035905820;-0.007700519622;-0.2649042670;0.036167911;0.021705107;0.004557344;  
0.024608814;-0.004513462072;-0.2015988152;0.025046476;0.015787408;0.002950389;  
0.395118362;-0.080453038246;-0.3193901722;0.410236929;0.264526312;0.048653677;  
0.510103732;-0.047262239958;-0.1374427516;0.516308366;0.424286173;0.027640147;  
0.048907767;-0.010405663968;-0.2804105598;0.046548532;0.027252634;0.006816056;  
0.025906436;-0.005868647034;-0.2574638315;0.024228965;0.013681786;0.002829575;  
0.839254906;0.0416381325659;0.06905458348;0.922727402;0.851207824;0.023703927;  
0.874184985;-0.037072867099;-0.0617953076;0.887051014;0.801396183;0.028928312;  
0.028036290;-0.005603921383;-0.2299421428;0.028990466;0.016483049;0.003847639;  
0.447381223;-0.058351648326;-0.1969014614;0.452948792;0.306226976;0.050717576;  
0.276056455;-0.052514356092;-0.2926172614;0.331229427;0.175342154;0.044605629;  
0.041715645;-0.007072044257;-0.2121473965;0.044907680;0.026959670;0.005466018;  
0.039681588;-0.008683916262;-0.2771693038;0.038897423;0.027765612;0.003359619;  
0.042767484;-0.008464992314;-0.2522613517;0.043277875;0.030439631;0.003972300;  
0.470126822;-0.068750386965;-0.2229563793;0.469406304;0.310287863;0.052908669;  
0.654587484;-0.073262939425;-0.1685089618;0.661234163;0.482455274;0.048679075;  
0.048145010;-0.010905352791;-0.2996568876;0.054441696;0.025686507;0.007982953;  
0.083091829;-0.024362175035;-0.4377218428;0.076092622;0.040368753;0.012654194;  
0.102182425;-0.034261503602;-0.5257640277;0.110726995;0.045733584;0.023749945;  
0.631774292;-0.073143031673;-0.1745725867;0.615176672;0.484605282;0.050067006;  
0.096547462;-0.032417457495;-0.5233667182;0.079138570;0.043078690;0.011639620;  
0.018586828;-0.003964790646;-0.2154003966;0.018043258;0.011040277;0.002078512;  
0.565119638;-0.0657484573711;-0.1751447639;0.561903686;0.436874033;0.053624353;  
0.925887050;-0.0146287194961;-0.0227286649;0.926573005;0.896237392;0.010333978;  
0.443014640;-0.098693536163;-0.3545002770;0.516977552;0.180963774;0.094705848;  
0.103143837;0.0464596991905;0.49633461195;0.209007889;0.096402738;0.039733587;  
0.029529877;-0.0058266134321;-0.2300551634;0.032409566;0.017228014;0.004818124;  
0.030581349;-0.006670773205;-0.2590815402;0.029666066;0.019292974;0.003852022

0.114531527|-0.025866265132€ -0.3358968919€ 0.108625161 0.075735806 0.010306282:  
0.068926679|-0.0174680902857 -0.3608984045€ 0.066368006 0.031535911 0.010617345:  
0.030016796 -0.006286632134€ -0.2465663284 0.028094931 0.019457672 0.002663327:  
0.123983347|-0.0221884447111 -0.2611992913€ 0.117467404 0.085045242 0.010402506:  
0.824973234|-0.069454806617€ -0.1252928446€ 0.821971995 0.705489162 0.040077017:  
0.046606603|-0.011852974644€ -0.3389656914 0.042386542 0.026003530 0.005904442:  
0.036699878|-0.0071222010112 -0.23873184292 0.034951523 0.023183909 0.003533220:  
0.148291256|-0.0398975972847 -0.41898975142 0.148708341 0.072416758 0.026721039:  
0.030139898|-0.006103601018€ -0.2379628643€ 0.031305940 0.017756768 0.004940168:  
0.910324703|-0.0197072143502 -0.03122846032 0.906495777 0.870045367 0.013626783:  
0.029969411|-0.0089480745144 -0.3656354679€ 0.028842873 0.015975083 0.004686789:  
0.045539714|-0.0134745770511 -0.40089470202 0.052838515 0.024525814 0.009440412:  
0.026408193|-0.0057241941927 -0.24677662592 0.026026778 0.017053052 0.003066484:  
0.874952559|-0.038840754323€ -0.0647518037€ 0.891150784 0.755624260 0.040165526:  
0.696275360|-0.076349422249€ -0.16504854901 0.697788893 0.524456681 0.061363367:  
0.024042595|-0.0049491955524 -0.22664913481 0.022528269 0.012987759 0.002937221:  
0.112627984|-0.029045420493€ -0.3899765854 0.117027667 0.058028261 0.017267250:  
0.055990810|-0.0120512214877 -0.2909206083€ 0.054481423 0.029031952 0.008743427:  
0.790872546 0.0705550245229 0.12180809359 0.903833531 0.776578938 0.045244604:  
0.030704671|-0.007706674906€ -0.3028159380€ 0.028599588 0.019998528 0.003602541:  
0.163078087|-0.036281488794€ -0.33939072502 0.177752093 0.093436214 0.027953075:  
0.035497991 -0.0103022797937 -0.3704031975€ 0.034542736 0.016875237 0.005494043:  
0.045698039|-0.012163342877€ -0.35546087851 0.041463182 0.022387432 0.006318213:  
0.539175817|-0.063509263063€ -0.1773019609€ 0.562248247 0.393049873 0.051125290:  
0.062862771|-0.0106491049741 -0.2279503376€ 0.056830998 0.046698546 0.004371721:  
0.356372006|-0.0464178279044 -0.1954439671 0.340444745 0.285684876 0.020922558:  
0.052240538|-0.011294575838€ -0.2888867221 0.050379691 0.031118553 0.005524977:  
0.046007219|-0.009992892054€ -0.2835296657€ 0.043397030 0.026444716 0.004575166:  
0.561324404|-0.0687837598657 -0.1850698731€ 0.560565110 0.405491375 0.050077901:  
0.021112676|-0.0046616808874 -0.23418047962 0.023995349 0.012698854 0.003325529:  
0.509161159|-0.0603767762011 -0.1783661696€ 0.523109920 0.385157433 0.048798973:  
0.595211045|-0.0524681642882 -0.13082977822 0.593410768 0.496873587 0.037209910:  
0.048143637|-0.0116655088047 -0.3230693465€ 0.047053991 0.028940808 0.006097529:  
0.044524616|-0.010695056571€ -0.3150035269€ 0.044954188 0.025232877 0.006573751:  
0.040887584|-0.0080202422981 -0.24743474087 0.040011858 0.026244717 0.005665165:  
0.026003210|-0.005567685964€ -0.2423693313€ 0.025138354 0.016661539 0.002924769:  
0.078603008|-0.019942529830€ -0.3678757691 0.067901335 0.041578645 0.008461384:  
0.046845330|-0.0115119165912 -0.3264670364€ 0.042838921 0.021334183 0.006701152:  
0.040695322|-0.0122643922494 -0.3995847448€ 0.038083883 0.022173648 0.005459566:  
0.050739393|-0.014485057313€ -0.3930438830€ 0.049754300 0.026451036 0.008616272:  
0.067785140|-0.0128228026801 -0.25989102934 0.059766795 0.049765281 0.003133853:  
0.081297634|-0.027171372087€ -0.50966216021 0.083749383 0.038637729 0.016333903:  
0.044497297|-0.0094629853644 -0.2751600622€ 0.046094301 0.028649001 0.006510700:  
0.272478572|-0.0342247589181 -0.1863255558€ 0.262847470 0.207240524 0.017844922:

0.059474591|-0.011278986787|-0.2555752522|0.059450050|0.034177424|0.007896377|  
0.411133299|-0.080962837568|-0.3080190831|0.392275218|0.256666084|0.043922842|  
0.531799925|-0.082512132016|-0.2383617536|0.560989614|0.382026646|0.051484424|  
0.511810450|-0.057730091841|-0.1691511985|0.520580655|0.380551508|0.042867701|  
0.069771120|-0.016081376694|-0.3248054762|0.065847116|0.036671108|0.012668038|  
0.060269982|-0.012156781282|-0.2740426082|0.059900848|0.036286225|0.007909003|  
0.062064692|-0.017130695902|-0.3915933400|0.055717237|0.035959119|0.007862321|  
0.512480402|-0.051445491940|-0.1495429361|0.503212084|0.429170679|0.027315643|  
0.633762305|-0.069074026574|-0.1637484796|0.644808716|0.478700973|0.047615982|  
0.959134388|0.0163921579535|0.02419799667|0.980001670|0.970566204|0.003016580|  
0.857008870|-0.032736184491|-0.0555277414|0.873817217|0.796798646|0.022446650|  
0.042728027|-0.011442597371|-0.3529372909|0.041491763|0.021117942|0.006747759|  
0.064898829|-0.014754463883|-0.3165135807|0.060456986|0.040667722|0.006927668|  
0.031962462|-0.006109866146|-0.2270217442|0.031031571|0.019654965|0.004190137|  
0.519798929|-0.074903132598|-0.2199088237|0.554195709|0.372708115|0.064884381|  
0.253477531|-0.081695090550|-0.5354670867|0.327586772|0.076346696|0.075246984|  
0.282631495|-0.050836307496|-0.2752995195|0.279861447|0.150826773|0.038309012|  
0.341297487|-0.040341924734|-0.1759848324|0.354258051|0.266944794|0.029288309|  
0.179853902|-0.050744176286|-0.4486663611|0.205535035|0.074156985|0.046858950|  
0.062307943|-0.014479158143|-0.3223663434|0.063784471|0.028315492|0.012899848|  
0.032599806|-0.009494996891|-0.3638060428|0.033184921|0.016063763|0.005402631|  
0.030835738|-0.007272820833|-0.2829641782|0.031953396|0.012710278|0.005552943|  
0.285538124|-0.052910153394|-0.2845983705|0.278673735|0.169850052|0.038799078|  
0.252911947|-0.045856220805|-0.2765142168|0.253294171|0.168630843|0.026200082|  
0.226011689|-0.057095318388|-0.3995729153|0.249412007|0.121997502|0.049750719|  
0.428159174|-0.047890404082|-0.1669870454|0.420493249|0.314040532|0.031699571|  
0.542417015|-0.053233513504|-0.1461875041|0.547299757|0.430328825|0.036817512|  
0.227470152|-0.046081792361|-0.3112431025|0.241062689|0.129569450|0.038865253|  
0.739227253|-0.060297055536|-0.1210455619|0.750580725|0.622490933|0.041010088|  
0.043359305|-0.007410272062|-0.2157053739|0.040572369|0.030227254|0.003970151|  
0.044642382|-0.009015209254|-0.2601271140|0.042811482|0.026056649|0.005745876|  
0.034798422|-0.009289143939|-0.3352518849|0.028958173|0.018875460|0.003304115|  
0.021898701|-0.003813285245|-0.1836765112|0.022257263|0.015257385|0.002254214|  
0.035156518|-0.006628165056|-0.2290137283|0.041348995|0.021805103|0.006701135|  
0.893815917|-0.029811629758|-0.0483886077|0.882467645|0.849362185|0.010413155|  
0.044248816|-0.007665058263|-0.2197646276|0.048017519|0.026473455|0.006560545|  
0.624284661|-0.064393650369|-0.1544444175|0.620103330|0.469496784|0.046770067|  
0.052214828|-0.014221417703|-0.3744221338|0.045183864|0.027458472|0.006694735|  
0.079916196|-0.018844554992|-0.3393069912|0.078715214|0.046555425|0.011396593|  
0.024949905|-0.004536226347|-0.2005682064|0.025484063|0.017016713|0.002725215|  
0.352251038|-0.057146576259|-0.2476865457|0.378809670|0.208350981|0.049621205|  
0.331868765|-0.058741755234|-0.2719932295|0.350866324|0.211220062|0.045116227|  
0.842691315|-0.036027303405|-0.0622809091|0.857841934|0.763136791|0.035300336|  
0.036109463|-0.009259395293|-0.3233955887|0.032415579|0.019598438|0.004352867|



0.077108718|-0.027634338870|-0.5505488011|0.068942301|0.033486000|0.010803645|  
0.059039471|-0.0155836047131|-0.3690731259|0.054277790|0.032949391|0.007106998|  
0.025035967|-0.0054295453011|-0.2429265765|0.025201854|0.015599930|0.002835603|  
0.683710121|-0.079497318137|-0.1755943483|0.706571488|0.513916327|0.059764004|  
0.063523389|-0.0250637385521|-0.6014192651|0.062930324|0.021912400|0.011551175|  
0.047061126|-0.008697897382|-0.2385976566|0.048561875|0.028209382|0.006588422|  
0.919706222|0.0249818600262|0.03825453850|0.961806752|0.907434494|0.016822001|  
0.053326347|-0.011039756343|-0.2763648532|0.049478404|0.036836532|0.004466060|  
0.115244658|-0.0402128588301|-0.5586746959|0.107291452|0.050251454|0.016947283|  
0.243703605|-0.043444330858|-0.2709745828|0.235370971|0.149404835|0.023502620|  
0.071579023|-0.017167964972|-0.3408898376|0.073970198|0.035368989|0.011511502|  
0.539644447|-0.046527437586|-0.1276047072|0.533354831|0.468776429|0.019758283|  
0.222295906|-0.042094225548|-0.2884337347|0.218117109|0.128337082|0.027424289|  
0.063087154|-0.0212768300611|-0.4963782444|0.057271607|0.029873058|0.008781249|  
0.728003922|-0.059510128576|-0.12129286471|0.705649963|0.619246823|0.031619646|  
0.062957615|-0.013339276958|-0.2913024086|0.060237115|0.030105603|0.008802559|  
0.944786675|0.0226690489954|0.03385292153|0.981501988|0.931528746|0.015242400|  
0.471396223|-0.114104344722|-0.39029782681|0.527637048|0.211852029|0.114136546|  
0.038414183|-0.009820233386|-0.3270550509|0.036643187|0.024010443|0.004171828|  
0.070450026|-0.013744265006|-0.2702815200|0.082208297|0.046089898|0.012736715|  
0.056046966|-0.018095470854|-0.4619164832|0.056480085|0.026834313|0.008526130|  
0.034141732|-0.007544457334|-0.2704070184|0.039364365|0.019363511|0.006084149|  
0.139754186|-0.021960313788|-0.2287776692|0.135451334|0.092638828|0.015115199|  
0.107871588|-0.017997343798|-0.2390314228|0.102168321|0.074170584|0.009115528|  
0.449879111|-0.101743086793|-0.3607470235|0.508395893|0.214446832|0.104439892|  
0.048165203|-0.010731662819|-0.2942487751|0.045327672|0.024837587|0.006556928|  
0.171321843|-0.055931908938|-0.5321311906|0.187524620|0.068469927|0.037411361|  
0.803405267|-0.051140430897|-0.0936820076|0.792083237|0.671372935|0.045723569|  
0.033703466|-0.006856608537|-0.2462061175|0.030265615|0.021451114|0.002864113|  
0.191855771|-0.031931723769|-0.2484347991|0.199540107|0.109531094|0.026419162|  
0.577235897|-0.0556686405041|-0.1436879206|0.577053073|0.472001352|0.032848667|  
0.201235516|-0.041067030354|-0.3118885389|0.241317279|0.111944408|0.035159285|  
0.792596924|-0.050618985994|-0.0939852910|0.784630750|0.664382058|0.035714846|  
0.627476718|-0.074807467991|-0.1800855305|0.647253292|0.499025821|0.042774305|  
0.553950834|-0.062031178777|-0.1681129486|0.579472022|0.418666254|0.049350924|  
0.141194086|-0.034006212719|-0.3675784218|0.151030856|0.086619329|0.018013948|  
0.042014539|-0.009862370371|-0.3033080775|0.042174059|0.021267129|0.005650169|  
0.048769942|-0.010977629933|-0.2982999094|0.051452573|0.020376385|0.010017658|  
0.851634690|-0.032075976448|-0.0547322406|0.856736204|0.766312602|0.027109488|  
0.555494298|-0.054321491501|-0.1457013876|0.580066345|0.433504357|0.042696189|  
0.054380013|-0.012203645822|-0.3032163662|0.054690858|0.035638019|0.006543862|  
0.564443866|-0.042707608181|-0.1114550773|0.566876462|0.486414315|0.026524824|  
0.070094770|-0.023142226282|-0.4919477578|0.072568302|0.034877260|0.011151115|  
0.152447471|-0.1150966241351|#####|0.053572008|0.019968700|0.011726140|

0.030891518|-0.006524764557|-0.25078805027|0.029831467|0.018066713|0.004533285|  
0.361004263|-0.041085937202|-0.1693268471|-0.347019789|0.283523457|0.020568174|  
0.050497127|-0.010830983688|-0.2846039060|0.051450691|0.031483546|0.007530592|  
0.595409726|-0.060674457873|-0.1523565768|-0.623626334|0.471092479|0.051255274|  
0.040017625|-0.006768939573|-0.2097802707|-0.044828146|0.027997497|0.005028310|  
0.341400223|-0.037214486778|-0.1614974215|0.341515077|0.281396770|0.020877898|  
0.067301066|-0.011194924363|-0.2257039942|-0.065273704|0.048445424|0.005479011|  
0.844690426|-0.060134040988|-0.1052523589|-0.872282324|0.676666171|0.064263889|  
0.026264836|-0.005666000394|-0.2450945639|0.023690228|0.015124855|0.002908831|  
0.591207300|-0.079411208195|-0.2043763880|0.571732309|0.446593738|0.043829475|  
0.578268528|-0.082191802191|-0.2171187276|-0.554894355|0.377398762|0.051687737|  
0.024188300|-0.0044916103201|-0.2032005616|0.022948674|0.015667878|0.002723130|  
0.028739311|-0.006343163048|-0.2579760091|-0.033620208|0.018407923|0.004625022|  
0.030051315|-0.006321699946|-0.2478337526|-0.029535240|0.016779923|0.003818780|  
0.532113141|-0.071961425232|-0.2054675957|0.556577429|0.344654404|0.070614470|  
0.035843356|-0.007868222917|-0.2716576395|-0.033288482|0.022869349|0.003006832|  
0.775907514|-0.049250548549|-0.0933665806|0.785230474|0.683879713|0.038828828|  
0.493171680|-0.056214757409|-0.1709149331|-0.488650018|0.394984491|0.031445542|  
0.685244087|-0.106072216438|-0.2388310175|-0.687956442|0.467060259|0.065445625|  
0.027198429|-0.005495960629|-0.2306465167|-0.029584783|0.017972169|0.004069857|  
0.022068358|-0.004749068257|-0.2312305039|-0.021702794|0.012897689|0.002597393|  
0.299328417|-0.036920967809|-0.1833732192|-0.291718012|0.222528765|0.024397442|  
0.460004063|-0.062503449169|-0.2058709955|0.511677025|0.322149451|0.050863421|  
0.040762918|-0.010006728136|-0.3167558104|-0.043188115|0.022919566|0.006884368|  
0.207521568|-0.049392606464|-0.3715901938|-0.217972680|0.078611702|0.044282200|  
0.815176854|-0.045223605656|-0.0813157053|-0.831022022|0.709764868|0.041385171|  
0.046150325|-0.016734864804|-0.5105327532|-0.041046193|0.022616734|0.006267467|  
0.158732494|-0.032598820097|-0.3097138545|-0.172111365|0.097640677|0.023912508|  
0.265422846|-0.048625243767|-0.2802428461|0.260935270|0.162140811|0.036756721|  
0.023804634|-0.004953923044|-0.2286141489|-0.022245831|0.015988649|0.001789144|  
0.017109143|-0.002664859735|-0.1492823990|-0.017372404|0.012585299|0.001424518|  
0.058368453|-0.014296794526|-0.3384581698|-0.059096168|0.026377662|0.009378270|  
0.030872803|-0.006036473382|-0.2305485532|-0.030631342|0.017580110|0.003849715|  
0.029532824|-0.005964448873|-0.2359483101|-0.029413852|0.019378749|0.003981842|  
0.058713333|-0.011341716167|-0.2602528867|-0.065854173|0.036217346|0.008223414|  
0.036594772|-0.006972599525|-0.2338601054|-0.038538497|0.022961500|0.005210520|  
0.850071015|-0.030759790682|-0.0525421676|-0.868399890|0.794756407|0.022309321|  
0.020080977|-0.004886200300|-0.2557267545|-0.021886061|0.013177199|0.002859956|  
0.789468151|0.0438635668352|0.07705965422|0.879813469|0.785312440|0.028189990|  
0.047811490|-0.010984193766|-0.3040065132|-0.049519360|0.026319439|0.006650749|  
0.031145401|-0.005292391134|-0.1986369441|-0.030414527|0.020414221|0.003150091|  
0.043475705|-0.010411793869|-0.3124042425|-0.045301642|0.023510199|0.006034341|  
0.030793831|-0.005171022295|-0.1955497257|-0.032106200|0.019244574|0.004174229|  
0.041835120|-0.008055434000|-0.2436682943|-0.043643584|0.026826785|0.005654732|

0.727405291;-0.0744142837172;-0.15346846600;0.750068882;0.598060309;0.052307573;  
0.572591640;-0.0529889128862;-0.13757444809;0.587762094;0.471776652;0.034024879;  
0.522648061;-0.0717737625229;-0.20880929362;0.519030833;0.396416373;0.047373027;  
0.024016866;-0.0048141631714;-0.22014832282;0.023937871;0.015456373;0.002889343;  
0.577995494;-0.0550075871840;-0.14170229959;0.591368877;0.458138476;0.046241571;  
0.062625551;-0.0119124836561;-0.25847013911;0.072132617;0.041406929;0.009811598;  
0.712480109;-0.0547188107652;-0.11362538754;0.709849786;0.587752687;0.044919510;  
0.068113312;-0.0148600325629;-0.30442815220;0.067026728;0.035510295;0.008374475;  
0.631416192;-0.0455379184629;-0.10624312779;0.646572161;0.541578254;0.032075525;  
0.811266485;-0.0437341334249;-0.07894772024;0.810947802;0.709282207;0.038742542;  
0.085941152;-0.0150244748469;-0.24571268479;0.099880392;0.058163558;0.013156866;  
0.449206944;-0.0516312727164;-0.17207652019;0.455529489;0.349768447;0.034398803;  
0.019037751;-0.0040610381917;-0.21734609999;0.020167997;0.010111241;0.002857770;  
0.178139510;-0.0546242501112;-0.49479820801;0.197208470;0.073513290;0.040591851;  
0.038065916;-0.0078569643149;-0.25749749959;0.039626672;0.025292624;0.005222620;  
0.679679425;-0.0690931039477;-0.15229403049;0.673855493;0.552858509;0.043005757;  
0.168103800;-0.0643464957454;-0.64675911109;0.154260346;0.070604023;0.029787275;  
0.045808824;-0.0101813705062;-0.29059110439;0.041181795;0.028020459;0.004432448;  
0.037373184;-0.0084967884552;-0.28517617502;0.043038153;0.019825827;0.008627351;  
0.704025618;-0.0656182452131;-0.13907534119;0.685849332;0.565919017;0.039279081;  
0.075820398;-0.0154083320342;-0.28549791691;0.076977286;0.035322922;0.013395277;  
0.051909803;-0.0085182995099;-0.21355769279;0.050061824;0.036265164;0.004823817;  
0.669607842;-0.0658235075999;-0.14697067544;0.653676359;0.469707740;0.054391144;  
0.791924448;-0.3395514100379;-0.79440904774;0.900453841;0.025042569;0.423143687;  
0.877070803;-0.0200512208720;-0.03298468224;0.873646410;0.835559688;0.011458592;  
0.082568625;-0.0235308798289;-0.42313794202;0.099779300;0.039364653;0.016919267;  
0.700552026;-0.0582877180480;-0.12348360010;0.724177924;0.590479916;0.045381641;  
0.045480735;-0.0099093235810;-0.28385784649;0.051919353;0.026211270;0.008511399;  
0.055067095;-0.0161949076624;-0.41291446634;0.054834430;0.029478853;0.008511863;  
0.068591564;-0.0234223940924;-0.51051218340;0.059252950;0.035136361;0.007610491;  
0.034210320;-0.0071752195759;-0.25548992199;0.033272135;0.019303993;0.004388674;  
0.033136203;-0.0068512963819;-0.24952963101;0.031802755;0.021701289;0.003772741;  
0.050224522;-0.0127059271429;-0.34185885689;0.050828929;0.025608876;0.006953317;  
0.066643952;0.0226740051078;0.37388263357;0.111639231;0.057380061;0.018008133;  
0.020274489;-0.0044042851134;-0.22681118429;0.019520049;0.011903865;0.002676391;  
0.491542158;-0.0877903646697;-0.27760540889;0.541306875;0.239843392;0.089910231;  
0.191199461;-0.1323663106489;##### 0.074597279;0.043765897;0.009674731;  
0.060174533;-0.0126655778269;-0.28716093029;0.060515966;0.040567191;0.006125205;  
0.056321738;-0.0178094508752;-0.45113160930;0.054404002;0.024867614;0.009196743;  
0.224648237;-0.0377484450839;-0.25303803352;0.238512964;0.136194500;0.032517872;  
0.078500148;-0.0132635812744;-0.23424584959;0.073603390;0.057952555;0.004630217;  
0.200408289;-0.0518066366479;-0.40778373817;0.178753354;0.116912982;0.021286635;  
0.756350976;-0.0563771932759;-0.11023952277;0.760188353;0.623108524;0.049517079;  
0.225342856;-0.0531518154129;-0.36931204409;0.227599494;0.102023261;0.035132583;

0.780288585|-0.045963965033|-0.08644761317|0.805444070|0.687182916|0.033832492|  
0.033144156|-0.006328021430|-0.2288269902|0.031562761|0.021729183|0.002840792|  
0.521754587|-0.050036814965|-0.14257242257|0.527985896|0.444564723|0.029657115|  
0.578511385|-0.058667269939|-0.1515023567|0.598061661|0.445182960|0.041800503|  
0.063771357|-0.013100478987|-0.28205658057|0.062306668|0.041443013|0.006353039|  
0.033274700|-0.007386951452|-0.27003239867|0.033319430|0.021509910|0.003894772|  
0.816024181|-0.0615675959017|-0.1117494449|0.846252752|0.633801644|0.063984530|  
0.050533196|-0.011970475478|-0.3178772747|0.047124703|0.026776841|0.006928121|  
0.590678710|-0.062834232882|-0.1594044669|0.636829551|0.442007598|0.059566296|  
0.025012888|-0.006771677073|-0.3100841124|-0.026198024|0.013561979|0.004918199|  
0.108309063|-0.026985871238|-0.3735074053|0.117592901|0.055183744|0.018972038|  
0.538263279|-0.051186719590|-0.1414007776|0.536564300|0.428771766|0.038815908|  
0.371075743|-0.039122671466|-0.1562794293|0.353829150|0.308389571|0.015748811|  
0.230774014|-0.034731631234|-0.2247385655|0.226530677|0.161150247|0.022826456|  
0.087622336|-0.030178761570|-0.5335302704|0.087147879|0.040686784|0.013196897|  
0.655401572|-0.048004315288|-0.1080262018|0.653041738|0.555384716|0.036078834|  
0.166427484|-0.033111332346|-0.2998741116|0.177081089|0.096962782|0.026368941|  
0.549193741|-0.051501728810|-0.1393946513|-0.532401172|0.452057886|0.029188928|  
0.426748031|-0.041570933636|-0.1443018613|-0.437672868|0.350499234|0.028862806|  
0.031433922|-0.007178927582|-0.2744980359|-0.032910282|0.019025638|0.004699567|  
0.662489740|-0.054855780806|-0.12276017877|0.704591770|0.528182236|0.047740939|  
0.152351697|-0.029823153666|-0.2928193492|0.168530002|0.091749912|0.025370036|  
0.080863358|-0.017827339478|-0.3150904995|0.071883944|0.045931323|0.007946636|  
0.034229038|-0.010050232008|-0.3718918613|-0.032245440|0.017255270|0.004425057|  
0.919549518|0.0222650311112|0.03414878622|0.967700934|0.914582647|0.018707453|  
0.050449048|-0.010769853934|-0.2830778488|0.051650471|0.029743691|0.006518390|  
0.032757927|-0.007154732850|-0.2641852276|0.032840822|0.016341156|0.005569638|  
0.927420707|-0.024303658748|-0.0378968588|0.934951144|0.836319741|0.029705983|  
0.861795053|0.0302023077150|0.04913419494|0.927094314|0.855575620|0.026006036|  
0.905522373|-0.031180558217|-0.0499910359|0.930195933|0.845409043|0.024134645|  
0.829589417|-0.034168899408|-0.0599417570|-0.828605746|0.748278699|0.026657130|  
0.053531328|-0.009525864967|-0.2343628206|0.054276386|0.032886937|0.006578741|  
0.030154513|-0.005744075458|-0.2227159041|0.033564671|0.018395121|0.005075050|  
0.546861416|-0.056610386039|-0.15466610157|0.542271193|0.412188740|0.047762730|  
0.557492480|-0.058022867817|-0.1556051767|0.538795240|0.409803706|0.038131567|  
0.049097670|-0.008938123735|-0.2365769503|0.046155168|0.029614274|0.004874047|  
0.450081685|-0.050821762505|-0.1688726310|0.468185631|0.336691473|0.043335970|  
0.037780396|-0.007616502504|-0.2505196761|0.033783381|0.024778597|0.002900163|  
0.082171328|-0.015287326288|-0.2616346068|0.077056940|0.056098045|0.007924385|  
0.483528367|-0.059742904070|-0.1861513040|0.482658087|0.351134191|0.038607164|  
0.033994802|-0.007161308450|-0.2563148373|-0.036226589|0.020800823|0.005018271|  
0.069383596|-0.011728830556|-0.2306493572|0.068047507|0.047013600|0.006845607|  
0.333907239|-0.049830184537|-0.2258252619|-0.362809588|0.230819862|0.040361931|  
0.907072794|-0.024283729083|-0.03871689757|0.920382987|0.863235498|0.016863424|

0.069854357|-0.018362227737|-0.3769693589|0.062458983|0.033724805|0.010250371|  
0.322822325|-0.051768365984|-0.2439050717|0.312543818|0.230771266|0.027257032|  
0.035342621|-0.006468382880|-0.2220533846|0.042325709|0.022405038|0.006449701|  
0.495161283|-0.060491359463|-0.1840092435|0.501114535|0.344763521|0.054538547|  
0.041455957|-0.008931410049|-0.2750422355|0.039206672|0.024462825|0.005195975|  
0.348286989|-0.040220529619|-0.1717874082|0.355627881|0.267509499|0.033541522|  
0.373030642|-0.069317064618|-0.2880118405|0.380659685|0.214685411|0.052445825|  
0.041647350|-0.009202428037|-0.2831023614|0.038559955|0.025092554|0.005260452|  
0.131401028|-0.021208839929|-0.2344494778|0.132604209|0.099877638|0.010658484|  
0.042905949|-0.011447380775|-0.3517596577|0.047793872|0.024461738|0.006790919|  
0.034784356|-0.005830670919|-0.2012350411|0.033823045|0.022212771|0.003834804|  
0.047271022|-0.009829443925|-0.2716533458|0.051341095|0.028553978|0.006669702|  
0.115950070|-0.029571396112|-0.3860660665|0.123825434|0.074301973|0.015321147|  
0.856657940|0.0303135439905|0.04959942997|0.922517959|0.855898984|0.020341517|  
0.060358014|-0.013232244849|-0.3005730733|0.058591860|0.037884248|0.007278877|  
0.040349148|-0.008320089023|-0.2605802063|0.043516207|0.021949174|0.006239864|  
0.954807130|0.0104540962540|0.01554813132|0.971499277|0.950158774|0.007722989|  
0.062324196|-0.010061652393|-0.2161138610|0.059111402|0.043184300|0.006002234|  
0.045940483|-0.011309154147|-0.3258359456|0.056825991|0.026620174|0.009173204|  
0.917856879|-0.058523138142|-0.0939921481|0.930200365|0.694615925|0.078058669|  
0.038712513|-0.008752645430|-0.2857406065|0.036576070|0.019485161|0.006509734|  
0.056245191|-0.008260164731|-0.1921353313|0.054153860|0.040825022|0.004379274|  
0.891017290|0.0325650833478|0.05122253144|0.946615861|0.886072041|0.019029250|  
0.046190133|-0.011247016590|-0.3222166459|0.042913539|0.017987393|0.008151007|  
0.650062244|-0.058511353048|-0.1339152832|0.672703847|0.497512016|0.056261439|  
0.466047170|-0.043203527016|-0.1372585613|0.472024609|0.365820035|0.032309414|  
0.034841846|-0.008367593807|-0.2979672675|0.035758858|0.017772771|0.005436056|  
0.026557862|-0.005035865218|-0.2138227697|0.026001945|0.015149128|0.003237980|  
0.486887590|-0.067391744039|-0.2102753321|0.523006504|0.317265312|0.063119750|  
0.088257310|-0.024773405824|-0.4191364627|0.101469408|0.048280063|0.015761493|  
0.067783688|-0.013454435134|-0.2739927059|0.063382809|0.041994771|0.006679472|  
0.059240912|-0.012752626456|-0.2936730124|0.066528321|0.029306484|0.010635436|  
0.055537953|-0.012075251844|-0.2937978783|0.055228747|0.038608969|0.005018685|  
0.497876426|-0.053765229955|-0.1614319034|0.498339572|0.376857113|0.036042068|  
0.026923600|-0.005488032584|-0.2321454162|0.030334216|0.014367370|0.005554129|  
0.026845636|-0.005116989807|-0.2157077899|0.030819013|0.017754756|0.003897154|  
0.857055895|-0.034313436435|-0.0582546164|0.855417188|0.786805999|0.020115331|  
0.114490930|0.0922217244513|0.79974276017|0.381471222|0.088032196|0.108765752|  
0.031360601|-0.006167484517|-0.2329638711|0.033705024|0.020940725|0.003835419|  
0.098589304|-0.031019996610|-0.4853241787|0.096798099|0.038675668|0.017988498|  
0.070897312|-0.014236269813|-0.2792478910|0.063961337|0.042408316|0.006954599|  
0.217195678|-0.053120274348|-0.3842230202|0.236990470|0.104647245|0.043440904|  
0.484929584|0.1285951397995|0.33322348536|0.840566453|0.481336008|0.122710875|  
0.847010893|-0.033671226206|-0.0578258079|0.850659142|0.767499494|0.026470687|

0.030391354|-0.0071206661381|-0.27979481431|0.029113356|0.016266833|0.004633720|  
0.036262132|-0.0081298720141|-0.27881971064|0.036661653|0.019169004|0.005743931|  
0.593193600|-0.0487830858981|-0.12166650369|0.591324155|0.478736448|0.030532829|  
0.784875420|-0.0432489386372|-0.08071286921|0.826498838|0.702089696|0.038955776|  
0.841795618|-0.0388769494171|-0.06739628817|0.833717185|0.723189275|0.033653142|  
0.023144483|-0.0046497598527|-0.21807397369|0.023266732|0.014269006|0.003142037|  
0.699154137|0.1344145761978|0.25040635243|0.927757563|0.656728715|0.099664194|  
0.061654525|-0.0184034945929|-0.42824837104|0.060572465|0.031804161|0.010349194|  
0.069480557|-0.0195653437512|-0.40767961134|0.066377796|0.037888318|0.010091567|  
0.821194223|-0.0436516964149|-0.07782779732|0.824860020|0.709939968|0.038578508|  
0.148255454|-0.0195662744037|-0.19039998529|0.152014371|0.117485519|0.010400076|  
0.557439285|-0.0536158694609|-0.14319339769|0.568130992|0.425580485|0.048177435|  
0.047058789|-0.0097511999701|-0.27037748719|0.043281261|0.027582861|0.005629302|  
0.545980525|-0.0554055805422|-0.15144826774|0.550357907|0.404448176|0.050370264|  
0.730728767|-0.0605878993609|-0.12311178511|0.747065452|0.597233440|0.046415265|  
0.453851532|-0.0481525037509|-0.15812373064|0.441853764|0.372105410|0.025487864|  
0.856027596|-0.0261388578342|-0.04421477351|0.859076274|0.786391045|0.021846745|  
0.053181455|-0.0110186761251|-0.27648043129|0.053382102|0.030978669|0.007866801|  
0.870975865|-0.0273630228362|-0.04552061503|0.877628401|0.808594450|0.020423207|  
0.309305620|-0.0496380135079|-0.24375571509|0.310472155|0.201549917|0.035316595|  
0.092170325|-0.0342899845509|-0.58991052269|0.080687805|0.039568148|0.013776240|  
0.142708311|-0.0285808935562|-0.29895676603|0.144159186|0.078574573|0.021035593|  
0.033875914|-0.0067072226744|-0.23934128582|0.037311101|0.020445284|0.005144508|  
0.024104989|-0.0035921016314|-0.16056408762|0.024465249|0.016896468|0.002594027|  
0.901930159|0.0206578942769|0.03231660993|0.942417492|0.896388247|0.015475265|  
0.057054578|-0.0127060302677|-0.30309434719|0.058089685|0.028274284|0.011624136|  
0.881996102|-0.0286169814004|-0.04704320154|0.893939702|0.823257365|0.023740817|  
0.075121460|-0.0111068966089|-0.20171372704|0.073701581|0.055087265|0.006332267|  
0.024396521|-0.0049854209519|-0.22590190549|0.022731781|0.012852963|0.003286837|  
0.046342522|-0.0121559121059|-0.35061488951|0.045308203|0.026049729|0.008071903|  
0.464122065|-0.0813652344469|-0.27162216939|0.469461000|0.327125045|0.041749869|  
0.097548713|-0.0341007618021|-0.55019610339|0.082313468|0.046989724|0.012936803|  
0.884884805|-0.0275855756059|-0.04517215419|0.910324960|0.824426896|0.025586369|  
0.026837337|-0.0042929849029|-0.17876157397|0.025837752|0.016656580|0.002937134|  
0.028863356|-0.0053161742732|-0.21221891219|0.033350495|0.018798983|0.005663064|  
0.877280118|-0.0250115368311|-0.04125232839|0.873407196|0.832155898|0.012966930|  
0.072908478|-0.0117509853799|-0.22050395899|0.075457773|0.052468375|0.007716589|  
0.636932636|-0.0686953594919|-0.16195387829|0.660874088|0.505260097|0.058554640|  
0.111729741|-0.0418012492644|-0.60689991949|0.108233497|0.050270062|0.018681838|  
0.385260232|-0.0737114217339|-0.29776505749|0.439385595|0.189154256|0.087114925|  
0.476841541|-0.0710653967534|-0.22764529081|0.509547849|0.325315614|0.054688226|  
0.048148035|-0.0086101942369|-0.23119945261|0.048471189|0.029695737|0.006675723|  
0.922633804|-0.0171616814214|-0.02679476759|0.934478327|0.881987869|0.015747484|  
0.788492662|-0.0477722346821|-0.08900340984|0.785881445|0.699846168|0.029710510|

0.908879658! -0.028042286477€ -0.0447138479¢ 0.920233681! 0.847691857! 0.022333705!  
0.442329964! -0.046593161244¢ -0.1568313986¢ 0.454514477! 0.347444633! 0.032743341!  
0.028943573! -0.005299570104€ -0.2110358891! 0.027909238! 0.019269936! 0.002688652!  
0.023499977! -0.004167700340¢ -0.1916710471¢ 0.028902292! 0.015982017! 0.003935617!  
0.346082665! -0.065522289205¢ -0.2933742292¢ 0.328902425! 0.217510540! 0.041966708!  
0.721106082! 0.0598850954160! 0.11358084959! 0.880004824! 0.691906788! 0.060357589!  
0.411024428! -0.041874203394¢ -0.1511343636! 0.418723112! 0.341252562! 0.025899526!  
0.372329656! -0.056819917149¢ -0.2321164015¢ 0.356354924! 0.268608594! 0.031021150!  
0.844319100! -0.048168516568¢ -0.0837256875¢ 0.845936940! 0.750734754! 0.034255818!  
0.028831110! -0.005510686858¢ -0.220806221310! 0.027760354! 0.019319556! 0.003247590!  
0.595005826! -0.054383175114¢ -0.1358850760¢ 0.597416681! 0.498849930! 0.031799221!  
0.202789668! -0.029935460712¢ -0.2187342803¢ 0.194836674! 0.153995311! 0.014188482!  
0.060323818! -0.015001786651¢ -0.3461592667¢ 0.064493862! 0.030802412! 0.009662370!  
0.022924000! -0.003393242217¢ -0.1569212423¢ 0.021766306! 0.018186692! 0.001234697!  
0.030410067! -0.006189138636¢ -0.2398358391¢ 0.032832549! 0.019509058! 0.004197009!  
0.901132202! -0.023658299268¢ -0.0379557031¢ 0.896873749! 0.826871386! 0.022494527!  
0.055694250! -0.007709728791¢ -0.1800992709¢ 0.054733172! 0.041645595! 0.004498528!  
0.759018167! -0.040217800719¢ -0.0774939959¢ 0.786219046! 0.657084178! 0.038552771!  
0.144231564! -0.045608757537¢ -0.5057710007¢ 0.145970005! 0.068833544! 0.027200263!  
0.847737917! -0.031210578126¢ -0.0534743575¢ 0.845354254! 0.771317583! 0.025202272!  
0.224907623! -0.034836150026! -0.2315780539¢ 0.234360562! 0.161966542! 0.023262766!  
0.082296725! -0.017322333407¢ -0.2998815470¢ 0.083130668! 0.050550761! 0.011756738!  
0.577666807! -0.054377328456¢ -0.1400795482¢ 0.591882428! 0.484024087! 0.034674469!  
0.882214113! -0.029829348922¢ -0.0490582788¢ 0.913411683! 0.825093399! 0.026511280!  
0.103923403! -0.028266362624¢ -0.4114204114¢ 0.113020890! 0.060160347! 0.015673121!  
0.039714438! -0.011022166583¢ -0.3616194696¢ 0.036987326! 0.019338670! 0.005178473!  
0.065374114! -0.012747180597¢ -0.2672858977¢ 0.075921334! 0.042914240! 0.009967807!  
0.022208400! -0.004156521530¢ -0.1993396088¢ 0.020414104! 0.013487093! 0.002499868!  
0.237721073! -0.029890880737! -0.1855126678¢ 0.232384309! 0.177632758! 0.017492092!  
0.657095381! -0.044623803817¢ -0.0998850884¢ 0.653423298! 0.562488988! 0.030498361!  
0.519808470! -0.061725856008¢ -0.1787077278¢ 0.504730582! 0.402608618! 0.036422831!  
0.059870592! -0.010520014177¢ -0.2354232871¢ 0.063187456! 0.037195469! 0.008069034!  
0.811307152! -0.035282990073¢ -0.0633482004¢ 0.812860045! 0.739822823! 0.024373694!  
0.032184364! -0.007060863402¢ -0.2642717077¢ 0.032641047! 0.021140140! 0.004013952!  
0.820029196! -0.036881156841¢ -0.0655719170¢ 0.821672191! 0.721915432! 0.032171939!  
0.069654479! -0.016802830898¢ -0.3418049098¢ 0.069890470! 0.041193419! 0.009141509!  
0.051382105! -0.009310513855¢ -0.2373216291¢ 0.052848165! 0.033056443! 0.006465264!  
0.121308648! 0.0293840422916! 0.29134236768! 0.170199116! 0.120221885! 0.017940419!  
0.055238978! -0.008688910361¢ -0.2062054314¢ 0.056126077! 0.038518422! 0.005516159!  
0.159835494! -0.036861887372¢ -0.3529980782¢ 0.163026383! 0.091681051! 0.022848742!  
0.555553180! -0.044917134624¢ -0.1193874918¢ 0.560273807! 0.468430114! 0.028921415!  
0.090464743! -0.030138906676¢ -0.5145625818¢ 0.098898196! 0.044914622! 0.017264707!  
0.147915766! -0.023298833760¢ -0.2302953285¢ 0.144151064! 0.103312708! 0.012864837!  
0.033929204! -0.008479676590¢ -0.3094139571¢ 0.033442274! 0.018638256! 0.004545851!

0.845500560|-0.039839716286€ -0.06879940272 0.837435457; 0.753079401! 0.026367076!  
0.896773627|-0.021133219686€ -0.0340213851€ 0.895789713; 0.844945259; 0.014262392  
0.081837894! -0.0215136221257 -0.38506684707 0.108151977; 0.038201341! 0.020875467!  
0.027640329! -0.008247344898€ -0.3568074012€ 0.022824815; 0.016771401! 0.002257880.  
0.038824896|-0.0064805879301 -0.2054489155€ 0.039418965! 0.028318726! 0.004230561.  
0.037188735! -0.0067839483602 -0.22391628022 0.047263182; 0.022634237! 0.007050032.  
0.472500075|-0.0708275679791 -0.22903206311 0.473630655! 0.342952740; 0.046699204  
0.040791035|-0.006068772708€ -0.1835807012€ 0.046446561; 0.029604638! 0.004955302.  
0.040588613! -0.008323981480€ -0.25936181057 0.039077059; 0.024426143; 0.004881668.  
0.038608007! -0.0087189950507 -0.2852025895€ 0.043349309! 0.022023906! 0.007783624!  
0.042831889! -0.011252933691€ -0.34555548322 0.040284907; 0.019507697! 0.006559997.  
0.158458549|-0.034576745490€ -0.3314337525€ 0.161074362; 0.081653853; 0.027215823!  
0.824314587! -0.0456235156964 -0.0811311592€ 0.832538442! 0.739095409 0.032105310.  
0.014615471! -0.003224370035€ -0.20255460281 0.015153530; 0.009200418! 0.002010928!  
0.338629804! -0.0490278869507 -0.21864905387 0.348706408; 0.247198495! 0.032014863.  
0.070570888! -0.0141665973554 -0.27898219184 0.068952234! 0.038582139; 0.010287885!  
0.306995158! -0.044159581162€ -0.2164290239€ 0.301080922! 0.209735114! 0.037974746!  
0.089300142! -0.0244703679507 -0.40818335847 0.098430257; 0.036626532; 0.018311400!  
0.037239546! -0.0073830013717 -0.24517845544 0.037125000! 0.024237571! 0.003472375!  
0.049093601! -0.011794739127€ -0.3211964421€ 0.051845130! 0.028595324; 0.007410737!  
0.035765040! -0.006256278072€ -0.21207329947 0.036067598; 0.024791349! 0.003973464.  
0.161940609! -0.0440000763517 -0.4264369250€ 0.177226944! 0.091055739; 0.029137192  
0.902020244! -0.025550765362€ -0.0409948884€ 0.919073006; 0.848594628; 0.025309441!  
0.080799243! -0.029000721508€ -0.5551079408€ 0.085754174! 0.035139784! 0.017181327  
0.033688381! -0.007161222586€ -0.2582801179€ 0.034548507; 0.019680702! 0.004733758  
0.097298951! -0.023390497384€ -0.35474789857 0.094830677! 0.031189157; 0.019470476!  
0.052920626! -0.0146095642617 -0.38117945827 0.052534954! 0.025021749! 0.008291467  
0.542917095! -0.084919423612€ -0.24056182582 0.627559337; 0.385508733! 0.074634459!  
0.070879424! -0.0240360442944 -0.50878038662 0.095552361! 0.027276965; 0.020457320!  
0.043535660! -0.008035779028€ -0.23463741414 0.042797364; 0.026746279! 0.005485602  
0.068836363! -0.013021351697€ -0.2604445439€ 0.070809688; 0.047010679; 0.008450652  
0.028767154! -0.0071311299731 -0.29326652807 0.025607910; 0.015199027! 0.002984157!  
0.384130454! -0.0589601875637 -0.2337790581€ 0.393326068; 0.278735386; 0.040421899!  
0.929687037! -0.015111746576€ -0.0233895402€ 0.931414681; 0.900419443; 0.011128973!  
0.460047561! -0.0730470206004 -0.2436657693€ 0.479438150; 0.307861990; 0.056714564!  
0.262083706! -0.0526147731002 -0.3100338289€ 0.307689830! 0.142997104! 0.050974422  
0.522111900! -0.082929284467€ -0.24442757452 0.561194163! 0.389738748; 0.050084034!  
0.201915498! -0.030063794223€ -0.22072665651 0.201307378; 0.144142586; 0.019947097!  
0.885534107! -0.0257519096254 -0.04209419907 0.907326710; 0.831478950! 0.023775670.  
0.076134160! -0.0277776476332 -0.5616918418€ 0.068943331! 0.029938492! 0.012229537  
0.096219753! -0.0140474776991 -0.2046473096€ 0.096304405; 0.064206724 0.009525929!  
0.653736766! -0.034177570171€ -0.0762691535€ 0.635265999! 0.589657659! 0.014297089!  
0.093564425 0.0662163318019; 0.71314443318 0.264834258! 0.068527017; 0.077060798!  
0.025152140! -0.003923032987€ -0.1707212002€ 0.024292883! 0.017326836; 0.001867742



0.558168874|-0.047276065618€ -0.1253332794€ 0.606053759|0.456634746|0.047012558  
0.030006851|-0.007080907119€ -0.2810222711€ 0.030268397|0.018332716|0.004397520|  
0.036437783|-0.0081942254611|-0.2800823594|0.037454484|0.021949429|0.004852532|  
0.033889098|-0.007582860198€ -0.2736451786€ 0.030885995|0.022007145|0.003347402|  
0.075854151|-0.012541749753€ -0.2278306268€ 0.071502822|0.048367925|0.008414154|  
0.049090527|-0.011689878848€ -0.3180200767€ 0.045304695|0.033546232|0.003877874|  
0.019093946|-0.003373845308€ -0.1778226901€ 0.018425739|0.012990851|0.001834050|  
0.741526211|-0.034518903295€ -0.0678355989|0.734036070|0.665894984|0.020280571|  
0.037057444|-0.008348119093€ -0.2817418087|0.043456450|0.021589504|0.006376024|  
0.027169766|-0.004814918590€ -0.2001477325€ 0.025435040|0.017526708|0.002386824|  
0.227131711|-0.047231605951€ -0.3204478997€ 0.224670245|0.153120251|0.022146181|  
0.908675749|0.0297205398834|0.04593427225|0.969544840|0.847895824|0.035133803|  
0.076186248|-0.029978756175€ -0.6166952494€ 0.074095656|0.032609177|0.014651834|  
0.038558412|-0.008310764356€ -0.2708167759€ 0.041966436|0.020524130|0.007114957|  
0.834538333|-0.044151816485€ -0.0774660438€ 0.845398553|0.745470577|0.032044171|  
0.635972671|-0.046332962066€ -0.1073772067€ 0.662860846|0.539848708|0.041131112|  
0.049806655|-0.010214566284€ -0.2701960348€ 0.044493690|0.032250344|0.004496948|  
0.033710091|-0.007655602597€ -0.2777875055€ 0.034977134|0.016496770|0.006407633|  
0.059135433|-0.0127231816731|-0.2934167869|0.055122444|0.031810408|0.008369768|  
0.536802658|-0.065169514720€ -0.1830855819€ 0.555587965|0.379290072|0.066777933|  
0.181054653|-0.0503872550571|-0.4416973953€ 0.177987794|0.103974764|0.023110556|  
0.152054227|-0.051761695794€ -0.5551415526€ 0.206401156|0.067725996|0.042825315|  
0.056484426|-0.020057810519€ -0.5180643144€ 0.048432224|0.026461369|0.007069109|  
0.747836339|-0.077896506144€ -0.1564792304€ 0.778667538|0.542054574|0.070396209|  
0.081382828|-0.0270167170161|-0.5056217862€ 0.076404314|0.040357903|0.012181710|  
0.039099845|-0.007405112874€ -0.2358533502€ 0.045744165|0.025296276|0.005955794|  
0.906939983|-0.028639105034€ -0.0457788902€ 0.916532569|0.801752110|0.033686732|  
0.032854935|-0.006302643082€ -0.2294994753€ 0.032340742|0.023003531|0.002849520|  
0.030905489|-0.004679687557€ -0.1752768372€ 0.029451982|0.021315335|0.002592513|  
0.051036832|-0.014027255395€ -0.3767253960€ 0.055019390|0.024109362|0.009431920|  
0.015862064|-0.003243145195€ -0.1933074467€ 0.016075895|0.010032547|0.001879244|  
0.949415962|0.0086866088363|0.01300346752|0.966579966|0.951051454|0.005231266|  
0.724865532|-0.074156548590€ -0.1534653246€ 0.734815665|0.571396900|0.054066945|  
0.042080801|-0.011014829247€ -0.3428081967€ 0.040823923|0.020974268|0.005549535|  
0.071811860|-0.014358827812€ -0.2784267034€ 0.072828258|0.047316463|0.008157048|  
0.028849340|-0.006155263771€ -0.2488608267€ 0.025414555|0.018538692|0.002805937|  
0.047973020|-0.009212594554€ -0.2496709273€ 0.048039254|0.029324192|0.006546635|  
0.231483488|-0.046812259582€ -0.3108848684€ 0.246705750|0.134956328|0.046582589|  
0.024718345|-0.004661439274€ -0.2080016812€ 0.024370007|0.017102079|0.002679065|  
0.017888341|-0.003239376138€ -0.1781350484€ 0.020541628|0.011571780|0.002880127|  
0.587697166|-0.058329340924€ -0.1481452391€ 0.568949649|0.489493421|0.028806363|  
0.053151304|-0.012270715502€ -0.3116971619€ 0.049510104|0.028994125|0.006041421|  
0.193791627|-0.025629307932€ -0.1939025348€ 0.190819697|0.155447846|0.011607862|  
0.037749774|-0.006769098730€ -0.2205501431€ 0.038313797|0.024655584|0.004698027|

0.036571058|-0.007801441553|-0.2645071897|0.034775344|0.023606684|0.003799310|  
0.282468548|-0.051184286492|-0.2775476709|0.271049487|0.197147518|0.026981868|  
0.201097247|-0.037142060397|-0.2791920684|0.225099699|0.130260263|0.030775359|  
0.098536642|-0.026781378202|-0.4087986484|0.106532506|0.049146532|0.020067099|  
0.075392888|-0.027964314816|-0.5723471999|0.076935890|0.029901001|0.013970183|  
0.083496839|-0.014150641423|-0.2367564998|0.083810421|0.057745627|0.007692468|  
0.020164185|-0.003779507231|-0.1931362358|0.019295654|0.012088471|0.002415893|  
0.067761797|-0.044638365809|#####|0.030718125|0.014753108|0.004559499|  
0.500836810|-0.079310030293|-0.2434123934|0.507156563|0.326612453|0.068157274|  
0.915584224|-0.017516268500|-0.0275640087|0.920455614|0.880763990|0.013316479|  
0.046143344|-0.008332504068|-0.2317772425|0.048465587|0.027531896|0.005818697|  
0.114304479|-0.048060340033|-0.7051799330|0.079441653|0.050617660|0.009474872|  
0.826391013|-0.055517751751|-0.0990891478|0.864278039|0.694510939|0.055812426|  
0.447312832|-0.051946292367|-0.1739543921|0.482739790|0.359673196|0.035922673|  
0.485065561|-0.068889551611|-0.2161702101|0.506635780|0.268467714|0.081717192|  
0.881827346|-0.023361527662|-0.0382953700|0.883742296|0.822467076|0.019801071|  
0.031458211|-0.007194313933|-0.2749686072|0.036048486|0.018901803|0.005409267|  
0.204291374|-0.044038008695|-0.3318904612|0.201928572|0.099293309|0.034773854|  
0.051015814|-0.008486446525|-0.2160589915|0.047463997|0.036301661|0.004751439|  
0.263262488|-0.042281789457|-0.2425151270|0.305667692|0.162046207|0.038999908|  
0.025334702|-0.004352514095|-0.1896467103|0.027923746|0.014801296|0.004361604|  
0.693077601|-0.050928570481|-0.1084822430|0.698841615|0.570131279|0.050485670|  
0.049846637|-0.009388118583|-0.2461723320|0.047341652|0.028973119|0.006412250|  
0.087465441|-0.029398810542|-0.5179430665|0.090011984|0.041235870|0.015245783|  
0.053152823|-0.015640155414|-0.4105350126|0.060109494|0.026293554|0.011440121|  
0.223543743|-0.037729774567|-0.2542091092|0.213023279|0.139714461|0.024312569|  
0.040994660|-0.008366416322|-0.2585365633|0.046529035|0.024691393|0.006954636|  
0.033454259|-0.007913246340|-0.2900127933|0.031129689|0.017923148|0.004081661|  
0.045385058|-0.009143762032|-0.2603149802|0.044839575|0.027139490|0.005220206|  
0.911689846|0.0394318902778|0.06043781818|0.964884754|0.926418216|0.012137023|  
0.032050317|-0.006968407456|-0.2613893979|0.031371730|0.019690385|0.004126784|  
0.056523245|-0.010725768895|-0.2536586758|0.056981721|0.033945433|0.007476283|  
0.267043051|-0.034246205667|-0.1903605032|0.260998142|0.195537666|0.019302079|  
0.154927216|-0.038593684331|-0.3845918765|0.173110667|0.090404298|0.025409629|  
0.040722545|-0.009897689574|-0.3131793529|0.039172565|0.026118573|0.004668133|  
0.030685058|-0.005658284250|-0.2160409340|0.028207166|0.023419591|0.001515253|  
0.183422293|-0.037862671956|-0.3142864568|0.182068020|0.118273197|0.019704652|  
0.281465631|-0.040849777780|-0.2178480951|0.316817244|0.182372790|0.035945594|  
0.029835365|-0.007287062068|-0.2914674688|0.036069413|0.017380030|0.006085592|  
0.882153985|0.0311289929118|0.04948014907|0.951015063|0.886196593|0.019685026|  
0.487227289|-0.056862458686|-0.1752062239|0.494867426|0.369486176|0.039241651|  
0.872857584|0.0397046132380|0.06346544606|0.936035526|0.876323171|0.018931184|  
0.022403756|-0.005181199875|-0.2513585098|0.024509593|0.010994097|0.004257344|  
0.285034846|-0.049299439610|-0.2637796165|0.305418863|0.179322932|0.036851528|

0.020253265|-0.004010481091|-0.2051700714|0.018304435|0.013352125|0.001606247|  
0.022873462|-0.004786487577|-0.2270221688|0.019773607|0.015286894|0.001394428|  
0.073059434|-0.017954956031|-0.3513872598|0.066227993|0.042795585|0.008135919|  
0.032925349|-0.006801880324|-0.2488934288|0.035858695|0.019571606|0.005473542|  
0.067852780|-0.010993251707|-0.2196153796|0.069511242|0.045391663|0.007422998|  
0.026678561|-0.004426020756|-0.1855242415|0.025899589|0.016659074|0.002830412|  
0.850984529|-0.040417986196|-0.0693669820|0.869630421|0.782076136|0.026790709|  
0.054426573|-0.009369730323|-0.2267339740|0.057474765|0.037394808|0.006316598|  
0.022486890|-0.003964759540|-0.1877758888|0.020345301|0.013192449|0.002175823|  
0.638208989|-0.035979829737|-0.0823872679|0.650181266|0.563662456|0.026547980|  
0.478381799|-0.052434552519|-0.1638558684|0.457685686|0.396463169|0.019351588|  
0.806990616|-0.040420848398|-0.0732039643|0.807176149|0.712486147|0.030647506|  
0.605464217|-0.054316915160|-0.1332954511|0.651967735|0.468801142|0.053782245|  
0.483908185|-0.046191211598|-0.1416558635|0.484451483|0.412852525|0.022655907|  
0.032083469|-0.006574922906|-0.2450873405|0.029851884|0.020781050|0.003065484|  
0.026056602|-0.004662167457|-0.1997546106|0.028472985|0.016246211|0.003558754|  
0.877054316|-0.035601768478|-0.0590963170|0.909942363|0.804943232|0.030287107|  
0.027008207|-0.003794231218|-0.1560548113|0.029303339|0.019563257|0.003383113|  
0.028059653|-0.005055516745|-0.2056155632|0.027324521|0.019945677|0.002334411|  
0.031016859|0.0093132100343|0.29520355873|0.055113802|0.025969677|0.010444560|  
0.079116193|-0.012487120800|-0.2177957644|0.079457513|0.052325973|0.009792682|  
0.768032707|-0.047499659368|-0.0908812658|0.766180304|0.680465364|0.026909645|  
0.035447963|-0.006550736201|-0.2245483288|0.038196517|0.023894497|0.004705432|  
0.050018928|-0.015941547770|-0.4453790715|0.049337697|0.021107849|0.008264149|  
0.033571503|-0.007439611101|-0.2701120818|0.033120731|0.016713350|0.005517266|  
0.490467919|-0.059244897443|-0.1817695242|0.511671530|0.388202704|0.041731747|  
0.084498738|-0.011655928856|-0.1899185853|0.086644724|0.063326458|0.008298351|  
0.904773739|-0.024161993548|-0.0386183116|0.903928022|0.854042667|0.017154985|  
0.063175184|-0.020434706915|-0.4724438438|0.062046249|0.032105903|0.009972514|  
0.872217687|-0.031694542355|-0.0527841889|0.874641820|0.800354969|0.026818962|  
0.067528587|-0.011621093918|-0.2342858752|0.074716373|0.045283577|0.008879739|  
0.036775649|-0.008367009823|-0.2843268193|0.038914790|0.019476454|0.007092579|  
0.031063081|-0.006011936687|-0.2283803325|0.032843374|0.017174066|0.005376164|  
0.163379340|0.0328037963591|0.24999434261|0.207243853|0.182089680|0.007963278|  
0.448999275|-0.034527379545|-0.1128228395|0.446829547|0.393619323|0.016102416|  
0.054050538|-0.012060248336|-0.3009684917|0.058439233|0.033003924|0.007635048|  
0.211451377|-0.036724146899|-0.2615934221|0.233949603|0.153071067|0.023975983|  
0.325564721|-0.066957344841|-0.3210921247|0.338771485|0.192664168|0.051429472|  
0.041875259|-0.008280951695|-0.2509068773|0.047798150|0.024694720|0.007925767|  
0.405740161|-0.039285362919|-0.1432054734|0.409907526|0.320864847|0.027623083|  
0.139658277|-0.026995855643|-0.2869787344|0.146817081|0.072997738|0.022206342|  
0.057566206|-0.010624838975|-0.2468247161|0.053114356|0.037211684|0.005928969|  
0.740349747|-0.052616409473|-0.1048874428|0.776455735|0.629389586|0.045399874|  
0.890800215|-0.023843770351|-0.0387019808|0.900913147|0.831921873|0.023499685|

0.407380902! -0.091307853473! -0.3561693879! 0.404251158! 0.268665790! 0.042713551!  
0.486694269! -0.048215608531! -0.1473187602! 0.500233280! 0.371820906! 0.036632301!  
0.052681815! -0.010415199972! -0.2621572238! 0.057463307! 0.032552665! 0.008094877!  
0.087077045! -0.019063473966! -0.3154050794! 0.081392619! 0.053140238! 0.010638358!  
0.247811807! -0.033771307359! -0.2025587852! 0.260103400! 0.191001090! 0.023629251!  
0.963715844! 0.007495979556! 0.01106380119! 0.979510473! 0.956750136! 0.006793381!  
0.837615328! -0.049068034024! -0.0860318232! 0.846016804! 0.753671534! 0.025166760!  
0.642243309! -0.055307603956! -0.1278346895! 0.638721582! 0.538822174! 0.034323960!  
0.103988918! -0.031402178902! -0.4649115180! 0.164674980! 0.035690052! 0.037502750!  
0.060611192! -0.010968975941! -0.2435630049! 0.066424300! 0.043193191! 0.007340115!  
0.144812332! -0.025810288735! -0.2631264803! 0.159224947! 0.084685600! 0.025161273!  
0.034860683! -0.006997987148! -0.2446744493! 0.032592516! 0.024208791! 0.003068595!  
0.054464318! -0.013487128745! -0.3386489968! 0.060782992! 0.028921376! 0.010968441!  
0.143952009! -0.022336522135! -0.2261514365! 0.154356171! 0.099306089! 0.018143589!  
0.035942122! -0.008201965077! -0.2837170697! 0.042475852! 0.018416480! 0.007968161!  
0.065698434! -0.015589282748! -0.3326788044! 0.065717503! 0.031744322! 0.010851534!  
0.025774081! -0.005849547741! -0.2575859559! 0.023784749! 0.015200927! 0.003232869!  
0.105997051! -0.019675796237! -0.2681620358! 0.103928704! 0.068964641! 0.012088109!  
0.093460616! 0.0537321754140! 0.60345336872! 0.241920649! 0.070811968! 0.060125377!  
0.456061653! -0.062481698824! -0.2076662965! 0.434535952! 0.337604517! 0.032092601!  
0.048949549! -0.009929207227! -0.2661002281! 0.051487514! 0.028722822! 0.006476454!  
0.388625519! -0.038370968043! -0.1460174151! 0.390577070! 0.314530104! 0.029780733!  
0.033171526! -0.006686375172! -0.2427706697! 0.033059847! 0.021093953! 0.004360009!  
0.069354736! -0.011259055004! -0.2207530274! 0.073096393! 0.047179872! 0.007643161!  
0.672222302! -0.054016067705! -0.1190036573! 0.668875759! 0.578976117! 0.033131463!  
0.107631025! -0.023030786696! -0.3143528944! 0.127840138! 0.054871675! 0.023530087!  
0.661995746! -0.060839766243! -0.1369114672! 0.685579341! 0.519765388! 0.043604962!  
0.676644725! -0.056554924536! -0.1240063746! 0.683886549! 0.529210321! 0.049153428!  
0.750031779! -0.046883573881! -0.0918578167! 0.760743799! 0.658912859! 0.037100728!  
0.047990035! -0.011012220534! -0.3038254069! 0.048601157! 0.032168612! 0.005704626!  
0.061158729! -0.016939897462! -0.3922467192! 0.055821634! 0.030892241! 0.009504125!  
0.046727385! -0.008515574849! -0.2346587613! 0.048922977! 0.029699180! 0.005969938!  
0.023218347! -0.003791030989! -0.1748243195! 0.022626272! 0.013889578! 0.002631000!  
0.064526284! -0.012890564649! -0.2739826537! 0.059711658! 0.045964870! 0.004650732!  
0.022580459! -0.003648454353! -0.1713406355! 0.021896489! 0.016793452! 0.001642599!  
0.065883857! -0.014914685658! -0.3157130672! 0.079428633! 0.040116577! 0.011597657!  
0.058535342! -0.012821417526! -0.2988101975! 0.072616474! 0.033474670! 0.012022552!  
0.028468711! -0.005140027455! -0.2069211519! 0.027172182! 0.016823852! 0.003098827!  
0.071094085! -0.012398352985! -0.2393762191! 0.071692540! 0.045805265! 0.007860577!  
0.029942577! -0.005812405842! -0.2268797600! 0.029413353! 0.017758749! 0.004455570!  
0.065638788! -0.020103413849! -0.4457192281! 0.053717222! 0.038972002! 0.005015612!  
0.089111925! -0.022373696314! -0.3691131839! 0.087138386! 0.040527661! 0.015605552!  
0.028143721! -0.005263476773! -0.2142245708! 0.028206343! 0.019048153! 0.003222676!  
0.911751509! -0.022098363362! -0.0350089844! 0.922925785! 0.856151255! 0.022745631!

0.056286719; -0.007362847161; -0.1698676132; 0.055217962; 0.040553633; 0.004662039;  
0.574410955; -0.041623065787; -0.1065946906; 0.592288408; 0.495212858; 0.034524314;  
0.059650123; -0.009999197365; -0.2235813731; 0.062921221; 0.037655772; 0.007167524;  
0.059070752; -0.012051430925; -0.2766240652; 0.055093645; 0.033551107; 0.007155433;  
0.613285181; -0.050636957840; -0.1222432461; 0.643546181; 0.502236186; 0.052310610;  
0.170666534; -0.056862055976; -0.5452657913; 0.168689272; 0.039724777; 0.041669855;  
0.706659713; -0.037556654471; -0.0776577257; 0.700742697; 0.637548547; 0.020761605;  
0.038791316; -0.012534750128; -0.4283821102; 0.033368428; 0.018473923; 0.006009617;  
0.342677670; -0.047326309488; -0.2078799598; 0.376141194; 0.226353199; 0.054600531;  
0.049237208; -0.008795674609; -0.2318915068; 0.046333639; 0.032183403; 0.004709409;  
0.170588769; -0.023843824822; -0.2042892625; 0.164400749; 0.129054601; 0.012244021;  
0.079115546; -0.016869460539; -0.3027577087; 0.082453475; 0.050713772; 0.010741747;  
0.432375811; -0.055786929371; -0.1944723553; 0.469082233; 0.322869311; 0.056223927;  
0.864411934; -0.031280525291; -0.0525555869; 0.879518480; 0.780872201; 0.028465850;  
0.041136854; -0.007120144283; -0.2163120992; 0.046974839; 0.023465650; 0.007581311;  
0.093622878; -0.029799566264; -0.4891941890; 0.082251910; 0.052340369; 0.010416643;  
0.100607853; -0.015264283445; -0.2142462723; 0.097777232; 0.073462772; 0.009612375;  
0.905771787; -0.019763465351; -0.0314759879; 0.906434466; 0.855574981; 0.017632423;  
0.403294483; -0.045670087538; -0.1689375984; 0.422258013; 0.286608311; 0.040646663;  
0.025583140; -0.005666531979; -0.2502472142; 0.025547506; 0.016646287; 0.002638608;  
0.175516286; -0.055248172056; -0.5100618452; 0.190748892; 0.083681973; 0.039229706;  
0.063449681; -0.012423215876; -0.2673211974; 0.067139856; 0.037050788; 0.009867889;  
0.037232008; -0.008605783039; -0.2901841814; 0.034024455; 0.020814767; 0.004602723;  
0.050334115; -0.010014455807; -0.2618518279; 0.051501674; 0.027093685; 0.008987426;  
0.078800700; -0.011924281830; -0.2080299272; 0.089359590; 0.053721922; 0.011294606;  
0.053434778; -0.025503148882; -0.7418726770; 0.032524433; 0.023250242; 0.002713605;  
0.063608987; -0.013004044083; -0.2804464498; 0.065299160; 0.035766811; 0.008537804;  
0.519572739; -0.061754504114; -0.1788807608; 0.588421189; 0.396134799; 0.063277118;  
0.054037048; -0.014746383441; -0.3775923653; 0.053577636; 0.029791353; 0.007463019;  
0.037576996; -0.007405870419; -0.2441052923; 0.036103001; 0.023052859; 0.004716045;  
0.180426635; -0.044127411329; -0.3803131674; 0.252347298; 0.073456513; 0.050328466;  
0.056005938; -0.010387580071; -0.2470346658; 0.059495793; 0.037084255; 0.006737337;  
0.598661134; -0.048579085875; -0.1200010581; 0.628434580; 0.481668633; 0.049021639;  
0.035254769; -0.007207598773; -0.2502806726; 0.038044593; 0.023039149; 0.004493788;  
0.038930716; -0.007659082937; -0.2455898663; 0.048241953; 0.022339899; 0.008290862;  
0.671825031; 0.083887327279; 0.16740097753; 0.852797530; 0.660064219; 0.068300036;  
0.444587316; -0.040370186385; -0.1341702139; 0.436654471; 0.365245378; 0.022417146;  
0.032795064; -0.006332679229; -0.2310354830; 0.033801639; 0.020415448; 0.004385054;  
0.034373952; -0.006480784194; -0.2277752921; 0.033384247; 0.022379595; 0.003717968;  
0.790571450; -0.066483013050; -0.1250762895; 0.836355248; 0.673883425; 0.051262581;  
0.073609515; -0.013357209726; -0.2511215645; 0.072769083; 0.047213145; 0.007102898;  
0.059316207; -0.015792194133; -0.3730064245; 0.058065503; 0.032731202; 0.009113166;  
0.123502706; -0.040284414791; -0.5181840078; 0.118753475; 0.030829117; 0.031217851;  
0.037506032; -0.008377346238; -0.2798840508; 0.035597605; 0.022966670; 0.005234655;

0.041933173;-0.0075875590471-0.22786495246 0.043158791; 0.025027984 0.005308866;  
0.523612643;-0.074518155672E-0.2170017400E 0.509002412; 0.366234282; 0.055388668;  
0.027144562;-0.0044724872827 -0.1850929385E 0.025721376; 0.017660376; 0.002274028  
0.043401931;-0.008123153396E-0.2380568987E 0.042747909; 0.023741532; 0.006359231.  
0.195869658;-0.025769299104E-0.1929301576E 0.186051944; 0.137993922; 0.015168457;  
0.042771512; 0.0795158936699 ##### 0.382704446; 0.023835555; 0.136384002;  
0.213452503;-0.036486010849E-0.2571884686E 0.230267537; 0.145518944; 0.027767438;  
0.023057809;-0.004124384367E-0.192254014310 0.023958655; 0.013948993; 0.003493831;  
0.817331714;-0.0575834541351-0.1040791849E 0.842235585; 0.707235956; 0.044890839;  
0.028674654;-0.005869206881E-0.2374529948E 0.029260451; 0.015034109 0.004464478;  
0.210016694 -0.0329084237897-0.2337396657E 0.221012929; 0.155111944; 0.019050826  
0.025718791;-0.004604042904E-0.1990846771E 0.028185607; 0.015843068; 0.003555225.  
0.035729964 -0.008536482534E-0.2980899816E 0.030637198 0.023234878; 0.002604787;  
0.049980498;-0.008839847432E-0.2300229867E 0.056521120; 0.033123101; 0.008446695;  
0.183824929;-0.068730327669E-0.6317346050E 0.191072002; 0.060197075; 0.043727713;  
0.028916898;-0.0062717053947-0.253526162410 0.028186661; 0.019109831; 0.003367834;  
0.881632815;-0.0230854415127-0.0378451729E 0.878946143; 0.820547489; 0.017286550;  
0.134641521;-0.050440134914E-0.618661557810 0.149111290; 0.046114886; 0.028899967;  
0.151606167;-0.0309744698987-0.3069772495E 0.153707741; 0.089659240; 0.021290575;  
0.938501543; 0.0132219809679; 0.01997208741; 0.961692569 0.921677909; 0.012407046;  
0.028109913;-0.0057741080901-0.2370337907E 0.026821609; 0.013451370; 0.003911644;  
0.115798674;-0.038766401780E-0.531494347410 0.123910500; 0.062630006 0.019128628;  
0.055052886;-0.009901933380E-0.2382272559E 0.054966068; 0.032918327; 0.007003164;  
0.063514329;-0.008526701290E-0.1778603926E 0.062027592; 0.048912947; 0.004839807;  
0.045509200;-0.011769076139E-0.3437695923E 0.042149438 0.022700804; 0.006714642;  
0.042334351;-0.0075086337797-0.2234315407E 0.041277459; 0.025928055; 0.004773665;  
0.042829978;-0.0075201824727-0.2215338265E 0.043165793; 0.028653179; 0.004757652;  
0.314673838;-0.053846780630E-0.26161925647 0.314948732; 0.149935000; 0.054348055;  
0.632207834;-0.043808765177E-0.101932333610 0.673231959; 0.556638873; 0.034481354;  
0.026796171;-0.0041789649387-0.1739224348E 0.028686449; 0.019006593; 0.002854699;  
0.104219725;-0.026719841404E-0.3844588132E 0.102312258 0.061188983; 0.013046837;  
0.038054243 -0.0082034489221-0.2700553440E 0.042084064; 0.022437068; 0.006270059;  
0.922955763; 0.0246381661579; 0.03760533014; 0.967840138; 0.907683744; 0.017847441;  
0.053241872;-0.010143740401E-0.25221897617 0.055484605 0.033933313; 0.007606110;  
0.046624707;-0.008152017877E-0.2242595553E 0.053005252; 0.030072521; 0.007681848  
0.054038174;-0.014467573188E-0.3694474239E 0.060017085; 0.028422059 0.009821429  
0.153851627;-0.0233476343221-0.221778869310 0.142952596; 0.111821988; 0.010964058;  
0.785487935;-0.034668382404E-0.0642857265E 0.780975955; 0.707561105; 0.022026552  
0.833111367;-0.030728779927E-0.0535638933E 0.831927832; 0.772692131; 0.020177497;  
0.098337806;-0.028748188848E-0.444884633810 0.088409753 0.041960691; 0.016882375;  
0.754443508;-0.060368610632E-0.1186809844E 0.755624594; 0.602682401 0.052538754;  
0.351281787;-0.042123141313E-0.1788507973E 0.353378811; 0.239915542; 0.033287697  
0.055390895;-0.0075288147141-0.1764715752E 0.055028535; 0.041531603; 0.005084421.  
0.147617042;-0.042305030344E-0.4508807283E 0.163846303; 0.069162125 0.026976176;

0.062971502;-0.020150479942€ -0.4662209297€ 0.057971687! 0.032031808: 0.010038587  
0.058810568! -0.0127191505557 -0.2948501087€ 0.066229631! 0.034123126: 0.009446049!  
0.064294994: -0.012619771922€ -0.2685739983! 0.069532716! 0.040415198: 0.009453749!  
0.311667819 -0.0348368304342 -0.1653707115€ 0.316386038: 0.228604802: 0.026452613!  
0.043346033! -0.008249592806€ -0.2423674314€ 0.039942295: 0.027869926: 0.005106929:  
0.026594740: -0.004830791220€ -0.2042460200€ 0.026962439! 0.016285949: 0.003767466!  
0.537879651! -0.046283924606€ -0.1273339645€ 0.526795650: 0.424959305! 0.027437426!  
0.795155749: -0.0497217497931 -0.09196216907 0.815161654! 0.646964121! 0.049920116:  
0.065186924! -0.014704293087€ -0.3139608797€ 0.058311196: 0.037964103! 0.006191530:  
0.066067094! -0.0219868636732 -0.4921711938! 0.054547680! 0.034505183! 0.007573715:  
0.834328860! -0.0366178746157 -0.0639658665! 0.841549204! 0.736289393: 0.034741326!  
0.051377176! -0.011633962997! -0.3032025685€ 0.053533004: 0.028535794: 0.008428150  
0.051225071! -0.010615697203€ -0.2747179157€ 0.051848805: 0.025660039! 0.007845838  
0.068382207: -0.0110029320567 -0.2182212902€ 0.076941478: 0.047689838: 0.009087272:  
0.701759800: 0.0656292689199: 0.12724636951! 0.824493720! 0.729438887: 0.027882660:  
0.123055446: -0.036043011155€ -0.4557859742€ 0.127727106! 0.042903898: 0.029101806  
0.577980031! -0.049050823866€ -0.12567138357 0.572200211: 0.458229127 0.043626739!  
0.135473462! -0.0356611964172 -0.4057167838€ 0.140675177: 0.076119329: 0.020609289:  
0.111425519! -0.024915943764€ -0.33132765802 0.149624625: 0.045352545! 0.032266326:  
0.406158882! -0.077856585218€ -0.2988214567€ 0.406969915 0.255246454 0.043354884!  
0.031452902 -0.006840628015€ -0.2601893712! 0.029155778: 0.019119007: 0.003529657:  
0.063627673! -0.010786964004€ -0.2285486462€ 0.065796566: 0.037156757! 0.009337655:  
0.665436670: -0.061355774548! -0.13739178612 0.679035757! 0.473926693! 0.063651225!  
0.896116819! -0.020586267777€ -0.0331549768€ 0.912837546 0.850943324! 0.019202685:  
0.735094925! -0.043812881070€ -0.0874294476€ 0.759280289! 0.637439098! 0.038345090!  
0.128610361! -0.023225741656€ -0.26458417462 0.126206027! 0.069669307: 0.017971359:  
0.509601945: -0.050417589254€ -0.1472519214! 0.507969031! 0.414857177! 0.030445917:  
0.456323766: -0.065316056350€ -0.2177019839€ 0.451299620! 0.314251662! 0.045852979:  
0.038073512: -0.0082663463502 -0.2722140501! 0.039967298: 0.024017644! 0.005755952:  
0.559346774! -0.057573500660€ -0.1538028208€ 0.552891985: 0.450644185: 0.034591436  
0.033697730: -0.007380909648€ -0.2669204400€ 0.034738135! 0.014758931! 0.007028512:  
0.090762505! -0.022217167945€ -0.35936135397 0.092652806! 0.038869460: 0.017309922:  
0.056300426! -0.0096968282252 -0.2281243826! 0.057387762: 0.035724801! 0.008863214:  
0.048377646! -0.009262881793€ -0.2492592605€ 0.047978274: 0.031281086: 0.005944054:  
0.081024814: -0.012361675652€ -0.21057214177 0.087038179: 0.056342064! 0.008742778  
0.207433354! -0.032285063429€ -0.2318920347€ 0.219719460! 0.129596982! 0.028076972  
0.037184616! -0.0071717984127 -0.23785433612 0.039889632! 0.023601671: 0.005203240!  
0.059935878! -0.009605210429€ -0.2131412174€ 0.062275284 0.044654179: 0.005316883:  
0.628321531! -0.056597958460€ -0.1339495455! 0.635955515: 0.439413035: 0.065421497!  
0.296329412 -0.057436890914€ -0.2995610123! 0.295812637: 0.177300362! 0.044274434!  
0.043492906! -0.009291888546€ -0.2752679963! 0.039803273! 0.023069564: 0.005029873!  
0.361013171! -0.045043101915! -0.1867309022€ 0.376112100! 0.262599211: 0.036883514!  
0.037022206! -0.008001036280€ -0.2690851970€ 0.037751599! 0.020265974! 0.005545079:  
0.036749771: -0.0073516685672 -0.2468331509! 0.036339012! 0.020362573! 0.004963759:

0.040430270|-0.007294760184€ -0.22541394192 0.041343490| 0.028947048| 0.003894353|  
0.056312058|-0.0170877405961|-0.4299000281€ 0.048911409| 0.031751511| 0.006442949|  
0.559398612|-0.056426727299€ -0.1505592203€ 0.624725224| 0.431692696| 0.057398223|  
0.855622960|-0.0209837411474|-0.0354035291€ 0.856893410 0.802812432| 0.017972655|  
0.491066969|-0.049110349532€ -0.14881913242 0.469801780| 0.409729908| 0.024061470|  
0.050968867|-0.016879785587€ -0.46765130982 0.054009175 0.020810074| 0.011946876|  
0.051894637|-0.007433473048€ -0.18458659127 0.053919362| 0.037336542| 0.005234745|  
0.577973710|-0.051746495640€ -0.13290720922 0.577433090| 0.482258890| 0.032761554|  
0.065653589|-0.015118372922€ -0.32163385522 0.074671675| 0.039819072| 0.009921653|  
0.156240777|-0.043638712920€ -0.43929103372 0.159914826| 0.074761328| 0.024189342|  
0.500221223|-0.0667624008281|-0.20232276202 0.477942503| 0.293689313| 0.058417646|  
0.075972717|-0.017472609197€ -0.3277726394€ 0.073799743| 0.051228387| 0.008720966|  
0.089061367|-0.018285665158€ -0.2944011464€ 0.083386174| 0.032137618| 0.015850092|  
0.047725595|-0.009192302518€ -0.2502363989€ 0.045202912| 0.028208153| 0.005294998|  
0.101646286|-0.023202473308€ -0.33610213322 0.112932556| 0.052472188 0.020079868|  
0.034822894|-0.0059100026422|-0.203987616910 0.042316645| 0.021894229| 0.005711626|  
0.280920726|-0.0373171096997|-0.1980507633€ 0.312629237| 0.208280845| 0.031987661|  
0.346453982|-0.0608050060121|-0.2698305566€ 0.364725107 0.208962158| 0.053025613|  
0.153567457|-0.024598887808€ -0.23512711757 0.149158561| 0.106979147| 0.016791283|  
0.029115768|-0.006459603574€ -0.26039493347 0.028182761| 0.016841252| 0.003951419|  
0.056239130|-0.009889318768€ -0.2332729467€ 0.053611830| 0.037698879| 0.005560246|  
0.885357412|-0.0295708921132|-0.0484523592€ 0.888981262| 0.824396535| 0.020842541|  
0.034286060|-0.0066447813244|-0.2345370087€ 0.034866815| 0.021857583 0.005262581|  
0.891219384|-0.024013980627€ -0.0389636455€ 0.892127150| 0.827864502| 0.021882848|  
0.171173581|-0.022276400224€ -0.1892790668€ 0.178886660| 0.123156758 0.016328930|  
0.904244918|-0.0361783235494|-0.05825034107 0.918725758| 0.759779353| 0.048698786|  
0.072502796|-0.022104399816€ -0.44993276927 0.063938594| 0.039458394| 0.008801799|  
0.629103121|-0.0503434660491|-0.11836991922 0.674483593| 0.529257196| 0.049059921|  
0.023150754|-0.006144004906€ -0.2957216938€ 0.023787946| 0.013728276| 0.003085312|  
0.025341795|-0.005305323488€ -0.2346599693€ 0.026342583| 0.014451721| 0.003448533|  
0.783023197|-0.0609788334632|-0.1154319855€ 0.839400528| 0.621411380| 0.064130149|  
0.860059877|-0.031775819630€ -0.0536754974€ 0.862832786| 0.796538954| 0.023992651|  
0.043429995|-0.0076698956011|-0.2235596927€ 0.047841443| 0.029979541| 0.005493761|  
0.886639221|-0.0182398226074|-0.0296505412€ 0.892234621| 0.842496043| 0.015788249|  
0.047437760|-0.0075404900862|-0.203038602010 0.054652607| 0.034246967| 0.006292185|  
0.039354520|-0.009362095505€ -0.3034554702€ 0.038183184| 0.024350667| 0.004159690|  
0.032497680|-0.006396026980€ -0.2353191836€ 0.035632929| 0.019510340| 0.005307375|  
0.028669571|-0.006136284237€ -0.2492821754€ 0.031226447| 0.016257979| 0.004987096|  
0.046077646|-0.0120690978161|-0.3496420066€ 0.042127904| 0.025689754| 0.006727819|  
0.052217271|-0.009406340743€ -0.23647855927 0.052014357| 0.032579566| 0.005806880|  
0.050642834|-0.009555488730€ -0.2473712039€ 0.051067646| 0.031308994| 0.007269918|  
0.526766224|-0.043573514104€ -0.1221424180€ 0.526773937| 0.454325189| 0.025082294|  
0.835249449| 0.0322547671720| 0.05402888650| 0.893278143| 0.817188069| 0.021909950|  
0.762105957|-0.0420473434834|-0.080786546810 0.779233799| 0.661588161| 0.042008605|



0.253902392! -0.043675116313€ -0.2610112654( 0.274946483| 0.154225572| 0.039122056|  
0.179113830| -0.053095651806/ -0.4754553970( 0.161372001| 0.081314419| 0.029514546|  
0.137161864| -0.031029984789€ -0.3416397961/ 0.149052837| 0.071063022| 0.023837843|  
0.770344069| -0.051769662777/ -0.0990340605€ 0.764547807| 0.661853178| 0.034079774|  
0.796867272| -0.042329952266€ -0.0777444463€ 0.829817088| 0.701998988| 0.043810260|  
0.276322211| -0.054470582646€ -0.3044377299€ 0.294410516| 0.174405085| 0.036312243|  
0.095171861| -0.026635108875/ -0.4213089172/ 0.092168247| 0.052404543| 0.013654020|  
0.640779080| -0.037754908856/ -0.0862239151€ 0.635207096| 0.545735250| 0.028973936|  
0.556797114| -0.055247526180| -0.1479583156/ 0.567453089| 0.449851383| 0.032765736|  
0.256696893| -0.035378755812€ -0.2053226283/ 0.249522200| 0.192334176| 0.021601293|  
0.419088948| -0.101934355060/ -0.3913042168/ 0.496198597| 0.174446146| 0.126154272|  
0.055683237| -0.014884589677( -0.3707351436€ 0.052980744| 0.028556503| 0.008935191|  
0.964782912| -0.010534189801| -0.0156756317/ 0.966163643| 0.925301094| 0.012931301|  
0.313160009| -0.036265598496€ -0.1717288149€ 0.338465110| 0.226900492| 0.031010640|  
0.030504451| -0.005770513727( -0.2217344927/ 0.031804188| 0.018227038| 0.004378147|  
0.571496504| -0.061881001904€ -0.1623260455( 0.584691644| 0.423336336| 0.049783254|  
0.063654558| 0.0501655605264| 0.74939902591| 0.201276931| 0.039750422| 0.065108331|  
0.041861679| -0.007525860649/ -0.2261962040| 0.052027945| 0.026852651| 0.007958524|  
0.099274052| -0.031250184721| -0.4859634463| 0.110392280| 0.038161957| 0.022911222|  
0.703785969| -0.060997042852/ -0.1288749584/ 0.724233904| 0.524682174| 0.053275848|  
0.873485080| 0.0399564405289| 0.06381483018| 0.939484681| 0.865544812| 0.021605782|  
0.083649151| -0.015523755351€ -0.2614743236( 0.097106609| 0.049601906| 0.014116066|  
0.037785787| -0.005455907213€ -0.1749051838( 0.036729217| 0.028483240| 0.003111877|  
0.058276324| -0.009141951101/ -0.2073884189/ 0.055429310| 0.041736050| 0.005133433|  
0.178220435| -0.032517651376€ -0.2736285315€ 0.195022674| 0.119992130| 0.023784533|  
0.709588156| -0.052496274641€ -0.1092859572€ 0.710612977| 0.562316097| 0.044623339|  
0.233186348| -0.034640916754/ -0.2217005343( 0.229645049| 0.169367642| 0.020120551|  
0.622581982| -0.039389436352€ -0.0927519954€ 0.636200601| 0.555223807| 0.022506556|  
0.110765421| -0.030807795168/ -0.4248899290€ 0.111014569| 0.050624172| 0.020867345|  
0.052299881| -0.006969246574/ -0.1711509412| 0.050977619| 0.038706362| 0.003640308|  
0.044874360| -0.008422868400/ -0.2404072836/ 0.042436952| 0.031643292| 0.003334601|  
0.284122324| -0.029726524643/ -0.1537170335/ 0.290606882| 0.232162446| 0.023701012|  
0.850300786| -0.037587188185€ -0.0644508672( 0.859368622| 0.779526850| 0.030459328|  
0.113427273| -0.014529300807| -0.1806841227( 0.114772148| 0.090823504| 0.007430966|  
0.715385417| -0.049120775689/ -0.1011598178/ 0.702676653| 0.574102106| 0.043851881|  
0.027109236| -0.004711675454( -0.1958931091€ 0.027968080| 0.018997640| 0.002906707|  
0.088919096| -0.014201694091€ -0.2235907077( 0.101437704| 0.057920276| 0.013228433|  
0.062770260| -0.012618080967€ -0.2747319641( 0.067484466| 0.021981517| 0.012802352|  
0.588184496| -0.041016043158€ -0.1024769443€ 0.607449894| 0.483572784| 0.033797040|  
0.027973244| -0.005395618590( -0.2211017969/ 0.028173846| 0.014608160| 0.004610808|  
0.087465762| -0.027478676756( -0.4778067848€ 0.102366019| 0.033874124| 0.020180262|  
0.160921850| -0.044113269136/ -0.4306844643/ 0.172322679| 0.094075467| 0.026180851|  
0.674194553| -0.051055074934€ -0.1118832639/ 0.707273041| 0.516856179| 0.061034670|  
0.078683051| -0.013551409602/ -0.2392377818/ 0.081268835| 0.046302641| 0.010382821|

0.696814608!-0.052042982214€ -0.1103400520€ 0.691271160! 0.515684427' 0.055204370!  
0.545120330!-0.077146010116€ -0.2158674206!0.580327458! 0.383790778! 0.064855243!  
0.787590891!-0.052132446705€ -0.0975210018€ 0.788995649! 0.675266049! 0.038120016!  
0.047509636!-0.008060309275! -0.2178528279! 0.051808124! 0.032795897! 0.005809546!  
0.041204795!-0.007399193358! -0.2251635466€ 0.044224678! 0.023685535! 0.005726261!  
0.746696019!-0.051197985270€ -0.1010717930!0.753198733! 0.658957920! 0.028769294!  
0.175757162!-0.043514404819€ -0.3850626410! 0.182348987! 0.084137155! 0.033273507!  
0.354444362!-0.046406403950€ -0.1964996194€ 0.346480888! 0.261559595! 0.027453639!  
0.160794588! 0.0553011272262! 0.40467138996! 0.354482914! 0.122488448! 0.063518106!  
0.067142530!-0.013299096842€ -0.2729882270! 0.067148247! 0.041338654! 0.008228883!  
0.043574742!-0.007816812037€ -0.2275312078€ 0.043182988! 0.025334455! 0.005157238!  
0.028076583!-0.004605197623! -0.1859757496! 0.027896332! 0.020102917! 0.002952670!  
0.096689003!-0.019221585896! -0.2865938796! 0.107594212! 0.061926525! 0.015047363!  
0.037810774!-0.007762100032€ -0.2555812852! 0.042737555! 0.022222034! 0.007497632!  
0.138740257!-0.023161414891€ -0.2442017543! 0.139615825! 0.091793539! 0.014551577!  
0.171865546!-0.059591170960! -0.5727501611! 0.149904334! 0.040338379! 0.036528568!  
0.033178140!-0.006439401275€ -0.2329989968! 0.032580705! 0.020288225! 0.003824788!  
0.034269176!-0.009358286556€ -0.3426254046! 0.040548306! 0.015499273! 0.006962662!  
0.840266948!-0.032480439356! -0.0561915954! 0.867055857! 0.754385886! 0.035858297!  
0.908947699!-0.018629670057! -0.0295480442! 0.919750985! 0.868110155! 0.017948509!  
0.068772333!-0.013596147477! -0.2733440845! 0.069294570! 0.037023851! 0.010676032!  
0.222619943!-0.044961153461€ -0.3098629218€ 0.256654402! 0.136764412! 0.036074850!  
0.046959189!-0.009795074760! -0.2722390261! 0.044232858! 0.031149899! 0.004967831!  
0.055863226!-0.014228337458! -0.3511269837!0.062131720! 0.029985688! 0.010505817!  
0.073748359!-0.011080337937! -0.2047403033€ 0.074168461! 0.055174369! 0.006046559!  
0.073484032!-0.020580213176€ -0.4083526733! 0.067510830! 0.037035646! 0.009384728!  
0.024769269!-0.004036298776! -0.1780255263! 0.025782145! 0.016775058! 0.003168006!  
0.070815857!-0.014131018996! -0.2772796153! 0.071745523! 0.041484160! 0.010884872!  
0.035504237!-0.006242497556! -0.2128767913! 0.034502176! 0.024546002! 0.002998848!  
0.035188276!-0.006540842124! -0.2255758885! 0.037310654! 0.018755137! 0.005506186!  
0.710270372!-0.037948074179! -0.0780851974! 0.713439857! 0.641158982! 0.022829655!  
0.044171234!-0.007080333753! -0.2020786501! 0.041985261! 0.030062910! 0.004519871!  
0.033832556!-0.004674941002! -0.1627099107€ 0.034182426! 0.022754226! 0.004110929!  
0.107068345!-0.025005257310! -0.3466562900! 0.120195861! 0.046357875! 0.022746440!  
0.024020987!-0.003573671889! -0.1601099782! 0.024163292! 0.017238903! 0.002106047!  
0.034981235!-0.005290903386! -0.1805356546!0.037052874! 0.022261186! 0.004656397!  
0.119864929!-0.017239823842! -0.2054834190! 0.117177603! 0.081155699! 0.012185434!  
0.316896987!-0.036544091540! -0.1710286585! 0.314740775! 0.242755561! 0.026058460!  
0.045409417!-0.010229053578! -0.2944353085!0.045337609! 0.026507166! 0.007146311!  
0.115655661!-0.020815561824! -0.2612850436! 0.116850870! 0.079612865! 0.012905336!  
0.047294629!-0.010916004194! -0.3049398544! 0.057256409! 0.022982676! 0.011483465!  
0.858408339!-0.025693436109! -0.0433289410! 0.869048137! 0.814487835! 0.018738978!  
0.050761097!-0.010240851621! -0.2662862664!0.056770160! 0.023063216! 0.009916906!  
0.254099761! 0.1531941353532! 0.65998082250! 0.554859889! 0.120349250! 0.155635394!

0.855344314 -0.0358448024757 -0.06103315285 0.856988056 0.754468637 0.032046164  
0.843070684 -0.0286679996697 -0.04931608331 0.858483832 0.772814643 0.028581833  
0.841670817 -0.0392300605724 -0.06803330094 0.856623486 0.741797404 0.037505199  
0.069238834 -0.0114514414131 -0.2251906713 0.062433314 0.051647921 0.004317507  
0.043947595 -0.009433183634 -0.27728616197 0.044330767 0.028165712 0.004866762  
0.383208099 -0.0341493750661 -0.13107322181 0.376635247 0.308213695 0.021094038  
0.722407471 -0.042638082397 -0.08653240295 0.725820689 0.615556903 0.039031006  
0.082926319 -0.0119588843782 -0.19874549226 0.076785445 0.062047325 0.004993162  
0.029234443 -0.0066337835342 -0.26721956488 0.026291980 0.018326777 0.002782205  
0.795072776 -0.0482520008595 -0.08916751205 0.815990844 0.673232993 0.049755040  
0.627036379 -0.0523298663072 -0.12366310135 0.633999661 0.510975381 0.044952963  
0.040074054 -0.0080012256735 -0.25117445074 0.040047175 0.024449000 0.005050605  
0.101200129 -0.0425366041722 -0.6955426359 0.135606440 0.027742944 0.031302362  
0.063294973 -0.0090629849106 -0.19042230103 0.060172776 0.049296566 0.004568951  
0.859926998 -0.0429566715427 -0.07305877562 0.910890184 0.762399444 0.043411866  
0.025284765 -0.0045786323384 -0.20051857947 0.027159597 0.015929970 0.004090866  
0.096100238 0.0249235173733 0.30440051085 0.156201244 0.078147601 0.026088623  
0.889586253 -0.0227961033783 -0.03703002445 0.895601809 0.825146939 0.021398266  
0.069496429 -0.0172309468406 -0.35245744965 0.085658570 0.034803427 0.014540103  
0.814023977 -0.0273050752941 -0.04861551426 0.814629162 0.734556511 0.024031329  
0.031466119 -0.0058690253685 -0.22017356915 0.030810391 0.021311765 0.003618219  
0.077999010 -0.0181286665016 -0.33280705666 0.081478665 0.045798622 0.011036014  
0.147208767 -0.0505875379807 -0.56018695255 0.151336228 0.063856584 0.028815855  
0.043080007 -0.0076748628611 -0.22531280296 0.041695145 0.030751318 0.003367667  
0.024243093 -0.0037744701726 -0.16848872506 0.024761617 0.015600137 0.003163800  
0.876733960 -0.0195217862635 -0.03211631955 0.879567455 0.821285784 0.016395169  
0.819303892 -0.0409125544047 -0.0729889381 0.824446470 0.705541756 0.036798044  
0.465618150 -0.0414851064325 -0.13166653465 0.480806407 0.398783501 0.025214608  
0.083740977 -0.0161733914325 -0.27322593435 0.081078366 0.053008862 0.009298367  
0.051679283 -0.0084918772496 -0.21370132215 0.052519091 0.032446322 0.007339303  
0.174815200 -0.0337813986767 -0.2912119540 0.167543495 0.092242589 0.023382664  
0.027861427 -0.0051029516455 -0.20886057453 0.033491774 0.016352320 0.006227831  
0.538927493 -0.0616099023927 -0.17175329794 0.562371489 0.413898112 0.050221132  
0.102787353 -0.0168206303991 -0.23299917555 0.107075734 0.056115480 0.013912125  
0.733095960 0.0717913568045 0.13305205030 0.908154335 0.703686216 0.071042593  
0.404332110 0.0948141025585 0.29729238610 0.736648045 0.369096321 0.111415998  
0.046875279 -0.0120801647316 -0.34446032685 0.044179800 0.027666149 0.005489058  
0.059513184 -0.014832628587 0.34625872586 0.065206257 0.034101801 0.009832441  
0.242127262 -0.0389302015401 -0.24196457542 0.279183620 0.162767028 0.035836875  
0.632109157 -0.0655433289163 -0.15533323913 0.617349756 0.495825425 0.044738015  
0.031526477 -0.0072203982367 -0.27556724783 0.027929170 0.019221810 0.002265258  
0.045154961 -0.0067050715604 -0.18699728077 0.047125562 0.032845499 0.004445352  
0.048082915 -0.0092162195514 -0.24926230956 0.065961521 0.025803757 0.012082903  
0.036003695 -0.0054153838141 -0.18068542656 0.039516620 0.025939419 0.003978790

0.029818215! -0.0047978820067 -0.1852357416€ 0.033391104! 0.022176302! 0.003383169!  
0.040381039! -0.0065214744694 -0.1999893839€ 0.049353723! 0.026723334! 0.007146607!  
0.021326603! -0.0035528536791 -0.1736663876! 0.023182776! 0.013172905! 0.003679993!  
0.123440190! -0.040047289786€ -0.5148084621€ 0.106112236! 0.060452865! 0.013194060!  
0.831791501! -0.107151969152€ -0.1964264124€ 0.870202870! 0.429581245! 0.163195551!  
0.041653368! -0.0082545689207 -0.25120729554 0.041800681! 0.023535419! 0.005810216!  
0.545421804! -0.0540693949124 -0.1477587587! 0.585376742! 0.424153813! 0.051154454!  
0.099372165! -0.017342673269€ -0.2490774559€ 0.104587285! 0.071509304! 0.012408916!  
0.081214509! -0.011046829537€ -0.1862426079€ 0.084952137! 0.056165235! 0.010912860!  
0.495892544! -0.0449032858487 -0.1340978424€ 0.529486198! 0.393918014! 0.036834599!  
0.603318867! -0.040722880591€ -0.0991197740€ 0.608828976! 0.532833786! 0.029997713!  
0.885975710! -0.031443974507€ -0.0515406974€ 0.886382348! 0.792830742! 0.029880399!  
0.319600400! -0.046693638317€ -0.22039133434 0.350696490! 0.223961386! 0.043313779!  
0.507600694! -0.0689616147951 -0.2062842578€ 0.549463423! 0.334173521! 0.069302304!  
0.640892805! -0.056468203216€ -0.1309261399€ 0.670103770! 0.464809922! 0.066182892!  
0.027820199! -0.0048220539271 -0.19677202187 0.028502321! 0.019718533! 0.002991807!  
0.033920259! -0.0050334263654 -0.17560482937 0.032533372! 0.025852290! 0.002527275!  
0.068389903! -0.0124141493984 -0.2487319143€ 0.067645701! 0.038781477! 0.010246719!  
0.065560440! -0.0104020349517 -0.21367981244 0.075013856! 0.037582006! 0.011742914!  
0.794736020! -0.047210878740€ -0.0872218386€ 0.830193947! 0.687515620! 0.050383700!  
0.028496097! -0.004448625559€ -0.17716452327 0.032883265! 0.019312287! 0.004024402!  
0.868176311! -0.030781267267€ -0.0514759273€ 0.878566690! 0.771515757! 0.033215703!  
0.038517326! -0.007925287487€ -0.2573032404€ 0.039480298! 0.021590534! 0.006234023!  
0.030475818! -0.0051235588164 -0.1952578202€ 0.030287985! 0.021092529! 0.002610031!  
0.048367937! -0.010937363434€ -0.2993587575€ 0.046480810! 0.030752216! 0.006332583!  
0.092797268! -0.0279663180451 -0.4580949264€ 0.119420560! 0.035299128! 0.026363569!  
0.032714522! -0.006649263986€ -0.24411689031 0.031830349! 0.016941997! 0.005255807!  
0.073347381! -0.0128418427177 -0.2414002775€ 0.075512479! 0.048283489! 0.010381063!  
0.093419128! -0.050233979187€ -0.95940768337 0.064413634! 0.027876263! 0.012039808!  
0.560434696! -0.0611919591201 -0.1637082355€ 0.603949739! 0.425220359! 0.052450923!  
0.895607344! -0.022342993508€ -0.03604037377 0.898344593! 0.813246162! 0.026276241!  
0.595808696! -0.054263133562€ -0.1353822173€ 0.600788737! 0.482562013! 0.046659575!  
0.494146335! -0.042350752427€ -0.12658818247 0.486107059! 0.388453249! 0.027979592!  
0.806940160! -0.060153853787€ -0.11034442251 0.839775099! 0.615953385! 0.070953564!  
0.875249872! -0.035798772646€ -0.0595538322€ 0.907477081! 0.783153361! 0.034528177!  
0.920884794! -0.0162106949777 -0.0253448327€ 0.933810578! 0.892435149! 0.013034267!  
0.478109549! -0.062554409179€ -0.1978588995€ 0.470780007! 0.350930973! 0.037611741!  
0.082916029! -0.027440387192€ -0.5049691992€ 0.100049484! 0.038755991! 0.019261970!  
0.455720128! -0.071329362544€ -0.2398374631€ 0.527525465! 0.295959158! 0.063180583!  
0.437889721! -0.054858770624€ -0.18850063061 0.508962129! 0.332325547! 0.062439997!  
0.344352880! -0.058682705917€ -0.2611980558€ 0.331504423! 0.226805505! 0.039586040!  
0.147992375! -0.0195206814844 -0.1902638432€ 0.144358036! 0.105504819! 0.012239386!  
0.863907877! -0.031114259127€ -0.0523018167€ 0.860443868! 0.803680167! 0.021014652!  
0.848819073! -0.032489698856€ -0.0556372782€ 0.846297651! 0.779317954! 0.022608317!

0.022811899!-0.003534001498€ -0.1644071326€ 0.025361652! 0.015431128! 0.002983835!  
0.049464846!-0.008930627260€ -0.23477641207 0.052580466! 0.029940756! 0.007470956!  
0.269694631!-0.041243413917€ -0.2301584135€ 0.278549790! 0.176202413! 0.030733573!  
0.106988836!-0.031249392798€ -0.4483399053€ 0.120551547! 0.048989832! 0.021212507  
0.056896640!-0.010030311714€ -0.23435909324 0.054498851! 0.037359158! 0.005862903!  
0.349084962!-0.031688605427€ -0.1332869690! 0.351820566! 0.280016953! 0.021289562!  
0.075328086!-0.0163712865771 -0.3073278689€ 0.076520397! 0.040876702! 0.012539702!  
0.027011440!-0.0047780581254 -0.1994157007€ 0.029282846! 0.019477567! 0.002966498!  
0.039663346!-0.007828580563€ -0.2474791152€ 0.039917367! 0.024797527! 0.005011985!  
0.088469663!-0.029685183732€ -0.51759625214 0.081953775! 0.041515970! 0.013882354!  
0.021007798!-0.0038426019787 -0.1908716160€ 0.021600185! 0.012858141! 0.002322292!  
0.041955353!-0.008813124121€ -0.26817168277 0.045565407! 0.027142271! 0.005962837!  
0.096324424!-0.020026744592€ -0.30107936917 0.110851479! 0.054401047! 0.018680752!  
0.109947258!-0.017651366149€ -0.2296519694€ 0.116081943! 0.071430815! 0.015743654!  
0.191757487!-0.122592137967€ ##### 0.351204071! 0.021299837! 0.106071622!  
0.035595241!-0.005674242692€ -0.19173544894 0.034817496! 0.024143608! 0.003536728  
0.054589087!-0.009353720255€ -0.2256981176€ 0.054963723! 0.032629938! 0.007028557  
0.723043180!-0.056519062332€ -0.1157568165€ 0.764023129! 0.602103622! 0.049847763!  
0.036397609!-0.006438250411€ -0.21551703447 0.042347112! 0.020989366! 0.006172886!  
0.026942986!-0.005051051279€ -0.21210885627 0.029489887! 0.016489965! 0.004251221!  
0.073159412!-0.009341598213€ -0.1719105446€ 0.070463510! 0.052573230! 0.006104641!  
0.715053702! 0.1025705823431! 0.19088812361! 0.882391566! 0.667542868! 0.066801822!  
0.942588806! 0.0092016251675! 0.01386897744! 0.964630721! 0.941991311! 0.007246989  
0.693959965!-0.043373780469!-0.0917465860€ 0.697444846! 0.604136657! 0.032973958!  
0.066597898!-0.0111605380331 -0.2271902568! 0.072148984! 0.047108488! 0.007985976  
0.038386439!-0.008846158093€ -0.29127964157 0.041069587! 0.020894091! 0.007220447!  
0.892233086!-0.059563633370!-0.09853336497 0.907962734! 0.688369325! 0.081312270!  
0.055938993!-0.0103926070514 -0.24743880654 0.051486660! 0.037373672! 0.004267959!  
0.424353239! 0.1202198009074! 0.35250868621! 0.684757244! 0.336804328! 0.095042342!  
0.695432973!-0.048781652490€ -0.1033815029€ 0.743275899! 0.562085823! 0.054196692  
0.858176282!-0.029903287493€ -0.0505678567€ 0.856641008! 0.789655413! 0.023822071!  
0.029444391!-0.008385857885€ -0.3448304631€ 0.027156138! 0.015888227! 0.003656925!  
0.753973193!-0.047623818382€ -0.0928586327€ 0.779750006! 0.627586858! 0.057749482!  
0.026265780!-0.003691260608!-0.1548649818! 0.027724498! 0.017455969! 0.003910367!  
0.706725324!-0.0432316270907 -0.08975588617 0.714466470! 0.595183046! 0.041197870!  
0.030789864!-0.006013398968€ -0.2300994027! 0.038423730! 0.018330992! 0.006391072!  
0.859485729!-0.029362243282€ -0.0495609502€ 0.866610523! 0.781775880! 0.027134417!  
0.049273393!-0.009303457229€ -0.24632427837 0.047407280! 0.033665804! 0.005063901!  
0.083417008!-0.016496661553€ -0.28031997567 0.100091538! 0.050190566! 0.015795049!  
0.806120143!-0.0393929305454 -0.0713735390! 0.814948153! 0.705539426! 0.041941730!  
0.792253723!-0.0404546308404 -0.0746480109€ 0.803110531! 0.694979384! 0.040623119!  
0.812202260!-0.0312192932611 -0.0558467098€ 0.835940777! 0.702779212! 0.035760088!  
0.210334556! 0.1293066301441! 0.66617935987! 0.477095964! 0.071440856! 0.110633451!  
0.057188788!-0.017691516809€ -0.4408715113€ 0.049200794! 0.031385625! 0.006423282!

0.032073767! -0.004795510919€ -0.1745866183€ 0.035510180 0.021402225 0.004267416  
0.081438510! -0.021230317411€ -0.381162504710.112769481! 0.036520136 0.024910128!  
0.126492224! -0.015431942392€ -0.1730931499€ 0.145052024! 0.096851435! 0.014290930!  
0.034519290! -0.007315710242! -0.25898913497 0.040179071! 0.018761651! 0.006561448  
0.105023942! -0.013926229225€ -0.1861838280! 0.109510960 0.068860704! 0.013453877!  
0.096603203! -0.022394303194€ -0.3402061630! 0.108661354 0.049638286 0.019937749  
0.044305005! -0.006566546731! -0.1859331939€ 0.044941548 0.029605287! 0.004820338!  
0.145892143! -0.017900410208! -0.1759663805€ 0.145040490 0.115738820! 0.010869732!  
0.049188243! -0.011473321016€ -0.31087011192 0.055393447! 0.027417888! 0.008741823!  
0.484889352! -0.041195325814€ -0.1253863377€ 0.506696771! 0.401318410! 0.032102756!  
0.030432877! -0.0049653457967 -0.18902994582 0.036296406! 0.021079014! 0.004557271!  
0.247541705! -0.0406503677622 -0.2478336416! 0.269702217 0.148980591! 0.040922548  
0.754600701! -0.053608000326! -0.1048717741€ 0.766092740! 0.614434953! 0.058734886!  
0.090157903! -0.020656085536€ -0.33321651492 0.105917374 0.034081449! 0.023797236!  
0.536118281! -0.0706436015702 -0.1998449360! 0.525245287 0.378334011! 0.047980818  
0.073935930! -0.013553887817€ -0.25408113252 0.078334297! 0.037268477! 0.012846186!  
0.033857662! -0.0048748875307 -0.1699921288! 0.035178722 0.023954365! 0.003803964!  
0.066964888! -0.009503217134€ -0.1901323758! 0.071795197 0.045991640! 0.008679191!  
0.160085779! -0.0211897291722 -0.19195704092 0.159583421! 0.105737382! 0.016913123!  
0.032899356! -0.005985066976€ -0.2167766132€ 0.034264377 0.022710046! 0.003816017!  
0.893178479! -0.028517892361€ -0.0462878243! 0.895267483 0.831619881 0.021854970!  
0.024405410! -0.004719033455€ -0.21283441937 0.025440241 0.013077244! 0.003949649!  
0.037433164! -0.0059152567032 -0.1921623773! 0.038599703 0.019651419! 0.005423863!  
0.479945870! -0.0758769345512 -0.2427513944€ 0.513406030 0.303858199! 0.065815672!  
0.041837226! -0.006659316424! -0.19837099612 0.047495823! 0.023243863! 0.007762998!  
0.442548073! -0.047013042443€ -0.1582445124€ 0.463474510 0.349594681! 0.037182085!  
0.056106818! -0.010954410482! -0.26137520922 0.051717889! 0.032365373 0.006041216!  
0.185166215! -0.030979505730€ -0.24936598317 0.219149254 0.132958288! 0.027435049!  
0.920430629! -0.020870042922€ -0.03272885052 0.932209418 0.868797614! 0.021096666!  
0.025954451! -0.004917291729€ -0.21217385842 0.026318828! 0.013403888 0.004941202!  
0.751017691! -0.032230953674€ -0.0624332869! 0.755251436 0.674179888! 0.027559254!  
0.057999219! -0.018130425292€ -0.4473808667! 0.067629214 0.023672319! 0.013748579  
0.037742636! -0.0059278786062 -0.1912660291€ 0.040179838! 0.024111031! 0.006160942!  
0.560071546! -0.048579951111€ -0.12849899347 0.567634602! 0.459676440! 0.036035014!  
0.918094657! 0.0224450821490 0.03447498847 0.962189566 0.897683038! 0.019974115!  
0.075396825! -0.030879932469! -0.6474790987€ 0.058949213! 0.032943095! 0.009534318  
0.198316420! -0.057624108500€ -0.4671707474€ 0.190322553 0.109629590 0.026689712!  
0.043322332! -0.0078559366362 -0.22993924542 0.045175354 0.024958698! 0.006175652!  
0.086081929! -0.027767602369€ -0.49207694442 0.098842612 0.040850867 0.018399522!  
0.331115573! -0.037949720501€ -0.1701533572€ 0.348839746 0.250639841! 0.029513923  
0.018859669! -0.002751278454€ -0.14454122647 0.021961806 0.013623229 0.002592149!  
0.428536002! -0.073118368700! -0.2631490331€ 0.471316636 0.269354617! 0.078641870!  
0.296994116! -0.0281149690402 -0.1385709428€ 0.298866931! 0.245510878! 0.018528368!  
0.192954094! -0.0259278077467 -0.1971898428€ 0.215335038 0.136153396! 0.025436108!

0.618565330 -0.0580744786135 -0.13985894785 0.644583706 0.473845568 0.054773393  
0.484394349 -0.0579259911435 -0.17978518485 0.544788701 0.348366657 0.053536640  
0.339689793 -0.0348797638575 -0.15159418357 0.346260688 0.287458359 0.019773099  
0.075381477 -0.0110706040981 -0.20034980137 0.081286375 0.048637999 0.011816177  
0.239133708 -0.0359455221485 -0.22479274081 0.259989442 0.121410949 0.039456746  
0.530002641 -0.0488438188810 -0.13677685010 0.532518507 0.412750795 0.036434921  
0.056386274 -0.0090788584990 -0.21216314415 0.058794282 0.035519948 0.007128253  
0.097822912 -0.0169755253011 -0.24714685715 0.093775801 0.060535726 0.009281804  
0.032947739 -0.0053589044330 -0.19227799302 0.031961454 0.018863758 0.004272312  
0.061990503 -0.0083352171035 -0.17752627865 0.059591696 0.046223189 0.004131447  
0.896504535 -0.0192434088614 -0.03095547677 0.902423662 0.831892767 0.022217282  
0.894818732 -0.0228109667251 -0.03683743955 0.905781086 0.831531512 0.026853411  
0.046504156 -0.0120032957945 -0.34452375615 0.043095281 0.025954658 0.005505603  
0.774558244 -0.0360304924097 -0.06782474881 0.774012077 0.710887428 0.022137127  
0.036367789 -0.0059968242665 -0.19980487065 0.044362317 0.024286411 0.005843447  
0.028238316 -0.0058657836491 -0.24024875875 0.035430233 0.013292422 0.006373383  
0.081827007 -0.0226076187240 -0.40774232765 0.079738839 0.042585344 0.009952643  
0.079727288 -0.0163598410372 -0.29040672135 0.085537731 0.047112551 0.012694458  
0.333073365 -0.0606497048604 -0.28065616835 0.368485353 0.191344487 0.050883221  
0.101115288 -0.0207524451395 -0.29825576035 0.115551898 0.051957669 0.019760574  
0.940141768 -0.0115878713285 -0.01770319545 0.946275846 0.901469954 0.013140195  
0.878231325 -0.0234688578911 -0.03863154347 0.894519601 0.813014938 0.025937041  
0.596243086 -0.0389951033582 -0.09591681565 0.600285215 0.510201366 0.027682192  
0.035605198 -0.0063535534085 -0.21644516244 0.040320436 0.022657458 0.005838681  
0.658375476 -0.0485283193810 -0.10874628274 0.684852724 0.556122951 0.043029470  
0.031837117 -0.0058359177602 -0.21673847285 0.029996966 0.019487224 0.003776925  
0.153671623 -0.0338167296100 -0.33390383025 0.189608498 0.096077780 0.027963061  
0.020953690 -0.0030896253025 -0.15170567572 0.024284323 0.013963178 0.003260617  
0.043230605 -0.0065183644797 -0.18845531595 0.048933422 0.030646896 0.006487209  
0.062458963 -0.0141378896625 -0.31314688550 0.066778263 0.024351002 0.013545717  
0.872060188 -0.0267662990787 -0.04445687045 0.869322239 0.819485638 0.015813827  
0.898879003 0.0325106662084 0.05070377652 0.959121648 0.889433977 0.022953741  
0.057266688 -0.0087114994855 -0.20009521175 0.064311597 0.039687644 0.007938647  
0.035364711 -0.0070762618824 -0.24466124247 0.037636903 0.017983793 0.006084226  
0.039254286 -0.0058434711564 -0.18219476505 0.036905388 0.028847820 0.002984095  
0.830555057 -0.0393125997701 -0.06910344965 0.828654289 0.755952413 0.024456710  
0.922824081 -0.0181069678375 -0.02827939014 0.929158882 0.872066504 0.018406424  
0.503224984 -0.0434408216362 -0.12759332574 0.544234671 0.432655950 0.034326542  
0.417926599 0.0440909947169 0.14147727806 0.524848384 0.381575900 0.049121917  
0.050072151 -0.0081891399165 -0.21143410952 0.052637260 0.034655290 0.006104863  
0.261863087 -0.0373304590867 -0.21309163561 0.293004443 0.145648553 0.043480249  
0.042337786 -0.0086017355275 -0.25902994594 0.049911033 0.019998941 0.008125264  
0.561445142 -0.0399237938874 -0.10448737045 0.583682774 0.474291637 0.038896672  
0.033663041 -0.0051566889681 -0.18131615750 0.032226472 0.025243551 0.002529868

0.707901403;-0.0426131359111;-0.0882822256€;0.738083846;0.609406891;0.045373520;  
0.873021186;-0.020671743599€;-0.0341754537€;0.873298485;0.819878082;0.018950105;  
0.052160658;-0.013579786042€;-0.3556133866€;0.052377543;0.031517935;0.006202192;  
0.532855723;-0.0474655559311;-0.1320035849€;0.534336725;0.411662531;0.035533393;  
0.791026080;-0.0380591480181;-0.0702286849€;0.801039693;0.728151444;0.025370524;  
0.046673952;-0.007263762781€;-0.1978772245€;0.050959221;0.028246081;0.006365201;  
0.099550613;-0.023291790239€;-0.34485362381€;0.093655921;0.047388089;0.015346233;  
0.785870315;-0.034373649833€;-0.0636956477€;0.801866688;0.711873839;0.029135652;  
0.019858714;-0.002967210108€;-0.1510015877€;0.021749498;0.014839704;0.002207032;  
0.869176617;-0.030593368768€;-0.0510968173€;0.866417233;0.791796398;0.024574012;  
0.077788228;-0.012633590961€;-0.2241653723€;0.071737681;0.054556503;0.005386896;  
0.793571126;-0.031850172523€;-0.0583464480€;0.804434982;0.693024476;0.030759078;  
0.801895441;-0.044231390735€;-0.0808188553€;0.834492295;0.671376676;0.047123668;  
0.720459772;-0.090135712606€;-0.1900026043€;0.797549094;0.481279686;0.089579789;  
0.466562856;0.2614494717985;0.63097840500;0.914691366;0.382418716;0.241199949;  
0.042456627;-0.006082341443€;-0.17779998531€;0.050210015;0.029926200;0.006957852;  
0.124444561;-0.018456078169€;-0.21302983191€;0.126585589;0.087818529;0.014976933;  
0.884177957;-0.023123972793€;-0.0377998477€;0.877994883;0.828706623;0.015844426;  
0.065039207;-0.007735350552€;-0.1569554080€;0.063280855;0.050912953;0.004229299;  
0.024063099;-0.004928145588€;-0.2254586850€;0.026190919;0.013033560;0.004015330;  
0.893809315;-0.020837550938€;-0.0336511223€;0.899440945;0.856171295;0.015329261;  
0.969154684;0.0056792948538;0.00834374811;0.982017122;0.963121517;0.005761969;  
0.051530172;-0.007758790150€;-0.1944554772€;0.051523916;0.036747574;0.005511843;  
0.896535004;-0.0194886411731;-0.0313532165€;0.904690823;0.845718862;0.018158836;  
0.026767659;-0.004998812227€;-0.2108245998€;0.026761260;0.017052147;0.003455987;  
0.122642255;-0.0270188596241;-0.3286110130€;0.188041587;0.044940423;0.044763688;  
0.055480141;-0.0089363035481;-0.2116876291€;0.059557493;0.031528863;0.008413864;  
0.953664602;0.0096905438885;0.01443518194;0.969437737;0.955680246;0.005452763;  
0.783977090;0.0536222850962;0.09428514458;0.926851808;0.795467768;0.043471456;  
0.397777801;-0.036674856301€;-0.1359637897€;0.389162950;0.326147067;0.024841714;  
0.067065098;-0.010349249715€;-0.2080481118€;0.070433141;0.043000886;0.007317501;  
0.715060278;-0.0493347275611;-0.1016635316€;0.724016300;0.577977863;0.045531147;  
0.669005789;-0.042536767497€;-0.0933335780€;0.682346277;0.550642286;0.036927121;  
0.510005891;-0.053512533194€;-0.1566714276€;0.522378893;0.400386044;0.035642000;  
0.039705683;-0.007092982715€;-0.2221273330€;0.037927840;0.024452639;0.004784551;  
0.096446532;-0.021874901183€;-0.3318832437€;0.095955466;0.056336352;0.011293937;  
0.052705958;0.0132094362708;0.27578993742;0.088385285;0.043953081;0.013495186;  
0.034756739;-0.007217136376€;-0.2536915407€;0.037725254;0.019487400;0.006080948;  
0.489516968;-0.050659680676€;-0.1542768676€;0.478300915;0.364367324;0.035379707;  
0.900290471;-0.019533423340€;-0.0312949854€;0.914206137;0.853034462;0.020447127;  
0.051722657;-0.009275395829€;-0.2349327279€;0.051907580;0.027112870;0.009432946;  
0.671878552;-0.044495515813€;-0.0973541839€;0.686155956;0.559765512;0.042744651;  
0.040017825;-0.007861832190€;-0.2467045836€;0.041351296;0.023578381;0.006204039;  
0.321098994;-0.048578661530€;-0.2289079276€;0.335850030;0.214717433;0.037033240;



0.173200044 -0.0377849447382 -0.333242768210.184841069 0.088074068 0.034601271!  
0.027810849 -0.0043474350315 -0.17621560440.029671339 0.018346936 0.003456574!  
0.887676538 -0.0182225677711 -0.02958761830.902355760 0.845074304 0.019300799!  
0.855578078 -0.0236233301978 -0.03992126580.857785817 0.810307941 0.014926966!  
0.168753754 -0.0349760502924 -0.31413357072.0208971415 0.091491872 0.035980657!  
0.059695898 -0.0078635368375 -0.17271164927.0.059198071 0.036265225 0.006942601!  
0.043704014 -0.0111542143732 -0.33587758123.0.041858073 0.024926451 0.005954842!  
0.033864585 -0.0058458726633 -0.20634694880.036705921 0.017229553 0.005783751!  
0.861127327 -0.0252088872950 -0.04236503277.0.869817146 0.803301055 0.023131724!  
0.425123397 -0.0386088414262 -0.13405076723.0.429550706 0.339174219 0.025861641!  
0.048052561 -0.0121978156507 -0.34028867007.0.052539582 0.028460260 0.007512618!  
0.408406669 -0.0665206078175 -0.24979747900.428108297 0.272756120 0.048083085!  
0.068219321 -0.0104381074092 -0.20663954200.067682843 0.048819716 0.006412453!  
0.158356599 -0.0261490841830 -0.24352256527.0.155131378 0.086457335 0.022912970!  
0.621844187 -0.0408190395640 -0.09634931640.624688511 0.503726747 0.034169196!  
0.690227907 -0.0498282942654 -0.10649816180.737059834 0.581834837 0.053924012!  
0.353286026 -0.0620394347710 -0.27016095607.0.421982030 0.146330129 0.088161863!  
0.143853729 -0.0254882617420 -0.26130226850.131266752 0.102911548 0.008205346!  
0.096950695 -0.0251899273560 -0.38746520810.147696099 0.048416082 0.030695873!  
0.059782839 -0.0123688238080 -0.28146933981.0.067204101 0.034152602 0.009154092!  
0.022525731 -0.0036111777590 -0.16978566640.021238834 0.014757553 0.002451771!  
0.468894610 -0.0606729720260 -0.19544049157.0.482830952 0.305110802 0.056032438!  
0.070700635 -0.0138026314610 -0.27061686580.072063746 0.041673955 0.009936246!  
0.051331777 -0.0113662738940 -0.29570236970.046641463 0.029806516 0.006011693!  
0.033709575 -0.0071332959250 -0.25704102941.0.035136839 0.018589695 0.005983980!  
0.081266914 -0.0165113558600 -0.28791109830.081396254 0.053025300 0.009710679!  
0.363564549 -0.0314560243060 -0.12690349670.366332313 0.287289353 0.028086867!  
0.092427316 -0.0196028192774 -0.30647107507.0.097086730 0.048135271 0.017718645!  
0.056183882 -0.0089498477421 -0.20960661210.056721023 0.032200884 0.007710715!  
0.125641727 -0.0257418122324 -0.30361078841.0.140275281 0.079466116 0.021192356!  
0.033688244 -0.0068413535060 -0.24570223972.0.037046194 0.018876045 0.005314204!  
0.079404306 -0.0187400299870 -0.33936326420.079689558 0.028869295 0.015146571!  
0.412634174 -0.0512685958991 -0.18656932941.0.414290761 0.321193562 0.029127639!  
0.645707762 -0.0594694973294 -0.13716400690.706637053 0.499913340 0.053327059!  
0.459206254 -0.0413293338260 -0.13302638110.467097474 0.342768552 0.046574460!  
0.863858177 -0.0325372433401 -0.05474291440.888726312 0.787273335 0.032750461!  
0.070132632 -0.0122815245080 -0.24001749630.064137377 0.049456929 0.004536661!  
0.076359625 -0.0147807865810 -0.27082384397.0.084547053 0.041871321 0.014857854!  
0.025283194 -0.0042275776520 -0.18412696510.024912724 0.016842660 0.002486771!  
0.187550937 -0.0232068935630 -0.18028761387.0.179149331 0.145943320 0.012837071!  
0.901880720 -0.0167885023744 -0.02680879780.907898636 0.858695962 0.016588171!  
0.021590533 -0.0030847237030 -0.14823631367.0.022373624 0.015272486 0.002034762!  
0.022487663 -0.0037158464620 -0.17523565154.0.023028492 0.015657066 0.002658813!  
0.055669790 -0.0117957832690 -0.28564047244.0.061877920 0.026730113 0.011693849!

0.052493861|-0.007187549111|-0.1762703364|0.057265096|0.035439628|0.006206969|  
0.032696879|-0.006507019062|-0.2385450930|0.038832896|0.017381091|0.005770777|  
0.034618811|-0.006356259625|-0.2217189875|0.036192869|0.020857572|0.004670771|  
0.816954458|-0.033806112336|-0.0602171553|0.820086520|0.741559364|0.026645337|  
0.046274406|-0.005922739779|-0.1604394008|0.047118057|0.032233355|0.004868925|  
0.841347450|-0.033772957780|-0.0583978556|0.836528606|0.750335983|0.027520699|  
0.840124474|-0.027930292032|-0.0481949309|0.825238362|0.799676483|0.011036561|  
0.094701771|-0.020638880311|-0.3167448695|0.089430336|0.049607125|0.013588847|  
0.758504802|-0.054428779309|-0.1059765984|0.795805932|0.622973049|0.048158813|  
0.048829646|-0.0196568406071|-0.5866909014|0.049186840|0.019361955|0.009321455|  
0.521073916|0.1218432176865|0.29798722814|0.903975698|0.446134542|0.150983325|  
0.029620180|-0.005108750376|-0.1991611921|0.036620213|0.019342566|0.004993928|  
0.055041217|-0.008941123995|-0.21335108721|0.057642643|0.030688875|0.007826829|  
0.073258860|-0.015163111244|-0.2900390711|0.070409654|0.036760477|0.009721112|  
0.758718195|-0.037874235429|-0.0728914030|0.784800580|0.665354564|0.035023764|  
0.023833961|-0.004542583699|-0.2079960501|0.024498687|0.013448508|0.003174691|  
0.837192247|-0.032781133751|-0.0569321384|0.848865964|0.742409620|0.038603635|  
0.883833328|-0.024248639733|-0.0396793014|0.897939582|0.819048199|0.025515341|  
0.040672619|-0.008723953958|-0.2725814944|0.039855076|0.021327095|0.005708400|  
0.401185768|-0.071621722888|-0.2761066236|0.395505357|0.256304045|0.050946415|  
0.057567417|-0.011909329619|-0.2797363696|0.073329166|0.035371514|0.011191757|  
0.055084550|-0.011311406030|-0.2754292857|0.060163617|0.032187690|0.008864504|  
0.927630210|-0.017391979957|-0.0270116609|0.935399197|0.875613162|0.020326953|  
0.035451576|-0.007744040289|-0.2694774454|0.051073836|0.017421237|0.009410129|  
0.735796234|-0.045094026815|-0.08998007131|0.734285635|0.625747604|0.037258707|  
0.221125015|-0.030333581318|-0.2029756911|0.244382542|0.148260465|0.027140902|  
0.190410911|-0.023054201517|-0.1763071456|0.220750672|0.142775311|0.022850201|  
0.119448736|-0.022062121446|-0.2695667006|0.115196406|0.068686040|0.013885367|  
0.334748359|-0.076921698779|-0.3642441063|0.376619743|0.132695478|0.089642192|  
0.712396052|-0.060495585367|-0.1261757203|0.739543861|0.563829226|0.059770567|  
0.042956963|-0.007950838577|-0.2346990500|0.045598688|0.029817040|0.005839637|  
0.455204179|-0.045955528173|-0.1500579154|0.491775795|0.358145433|0.042383983|  
0.061466256|-0.009972013823|-0.2168108739|0.061862509|0.044254308|0.006277727|  
0.045347298|-0.006914525872|-0.1925293071|0.050756403|0.027981208|0.007095636|  
0.167411682|-0.021403453867|-0.1854788874|0.176916929|0.125203369|0.016284660|  
0.278069523|-0.049103566638|-0.2696119315|0.272953809|0.194048448|0.023837070|  
0.780794247|-0.045063012359|-0.0846466060|0.782707928|0.682755790|0.036930941|  
0.893016050|0.0132849655135|0.02106998817|0.920328902|0.897351608|0.008032118|  
0.036876207|-0.006759759478|-0.2246619803|0.038776915|0.026222734|0.004510215|  
0.519857194|-0.062389645389|-0.1807373625|0.551623222|0.357295313|0.058454605|  
0.097325240|-0.018102261388|-0.2665021809|0.103362069|0.054039432|0.018895390|  
0.829365378|-0.029735321443|-0.0520361070|0.865656516|0.752562821|0.031221107|  
0.227019098|0.0689476940739|0.36837176794|0.389231354|0.170239263|0.088205626|  
0.732838790|-0.065064169293|-0.1322435365|0.764155088|0.568570080|0.060947184|

0.297864541|-0.026807005402|-0.1314302148|0.294083744|0.239576448|0.019998414|  
0.903422266|-0.016707450844|-0.0266327243|0.909260607|0.871080187|0.010845712|  
0.832787860|-0.025555687596|-0.0444235323|0.833378662|0.769909821|0.020881756|  
0.852535974|-0.024884502355|-0.0422345337|0.855459534|0.792316378|0.025514139|  
0.037348649|-0.005946133199|-0.1936048255|0.038870811|0.028722378|0.003059434|  
0.188394588|0.0439790934296|0.28886037762|0.276035810|0.145704514|0.045383404|  
0.085983656|-0.010396729404|-0.1653983242|0.086973763|0.069469462|0.005420674|  
0.044712454|-0.008775573030|-0.2522163582|0.050690198|0.026033712|0.007333641|  
0.911921401|-0.017291032800|-0.0273153303|0.917829060|0.871640242|0.015609752|  
0.347918770|-0.049506237594|-0.2147708127|0.346415110|0.226525806|0.042341294|  
0.059184175|-0.007638626148|-0.1687875565|0.058585723|0.041675696|0.005510119|  
0.213810292|-0.043501610422|-0.3118075185|0.311092288|0.114247542|0.059896984|  
0.026754459|-0.005310058588|-0.2251161587|0.027181929|0.015983763|0.003794869|  
0.713383782|-0.046027006644|-0.0948453275|0.733666828|0.548325224|0.055074767|  
0.186571881|-0.032841521447|-0.2637351049|0.217365303|0.134836918|0.025624325|  
0.713758260|-0.051502297798|-0.1064972627|0.735888778|0.603656078|0.048303011|  
0.037638345|-0.007982425944|-0.2645870694|0.034270039|0.023264713|0.003926849|  
0.218823816|-0.037227112992|-0.2561644795|0.270386787|0.144852816|0.036685639|  
0.088239393|-0.020109632233|-0.3304294496|0.096433568|0.030999746|0.018482737|  
0.037419207|-0.011041421920|-0.3824138240|0.039609632|0.020335132|0.005663909|  
0.966641093|0.0058145838506|0.00856384027|0.980591417|0.959899366|0.005940691|  
0.177778905|-0.023779777881|-0.1953468631|0.182809061|0.123763888|0.020759798|  
0.570193489|-0.038572562848|-0.0992506253|0.584982896|0.475463795|0.034502185|  
0.792083954|-0.042643167651|-0.0788157690|0.794150410|0.689301216|0.030145074|  
0.190639807|-0.046857253154|-0.3837160213|0.192644023|0.082920558|0.032349878|  
0.274385012|-0.035790832433|-0.1940529133|0.275831410|0.202794701|0.022694109|  
0.066460480|-0.009606627542|-0.1937035568|0.065316996|0.047716273|0.005928112|  
0.038356347|-0.012765706461|-0.4422073633|0.036525168|0.020486869|0.004785749|  
0.151414895|-0.048506682287|-0.5156232823|0.163260983|0.066863563|0.036235791|  
0.902298522|-0.021229247956|-0.0339683847|0.914918803|0.842546183|0.021877949|  
0.059918159|-0.008499124368|-0.1869813604|0.064962173|0.041638165|0.006221387|  
0.064018437|-0.011108712164|-0.2346016181|0.069887212|0.037157869|0.008684871|  
0.756159425|-0.044162108095|-0.0856511483|0.808776787|0.647753926|0.049321044|  
0.081440870|-0.010961841461|-0.1842262383|0.079875226|0.059605665|0.006456805|  
0.563143444|-0.057496389423|-0.1525123353|0.563194921|0.444523881|0.040737530|  
0.512225821|-0.058496240656|-0.1713900357|0.594075033|0.379455996|0.066191578|  
0.864157084|0.0261901807185|0.04258900549|0.916490328|0.849154721|0.020865585|  
0.172072353|-0.030930976924|-0.2686132075|0.208384635|0.084042415|0.032388050|  
0.659129192|-0.053490596068|-0.1202011050|0.690365074|0.502916256|0.072370677|  
0.174947488|-0.023447351320|-0.1955803185|0.194573228|0.125325128|0.023550017|  
0.401518004|-0.036515787992|-0.1340564291|0.383713694|0.324523479|0.017687184|  
0.606827091|0.0275974133677|0.06314522408|0.652737009|0.620787224|0.012258330|  
0.796626900|-0.026955641889|-0.0490355667|0.807918423|0.720736405|0.028020048|  
0.304106988|-0.028074618421|-0.1350776166|0.306028115|0.244236286|0.018431577|

0.022751838;-0.003153474287;-0.1460584460;0.024235467;0.015692800;0.002386039;  
0.096977670;-0.028155313158;-0.4406328926;0.085428243;0.047403129;0.012242712;  
0.153198920;-0.042697633610;-0.4375829599;0.163884233;0.077786338;0.026443069;  
0.650160209;-0.0493841566101;-0.1121726856;0.679573534;0.516156820;0.054451066;  
0.511182605;-0.049569502712;-0.1441851336;0.505185321;0.414968984;0.034201082;  
0.233395923;-0.025528197196;-0.1598525056;0.262670546;0.177113223;0.024996890;  
0.811733611;0.0447446401672;0.07649275985;0.903659501;0.767119072;0.043355163;  
0.446210094;-0.080713757419;-0.2808995349;0.474945396;0.275169641;0.071952595;  
0.056146609;-0.011283572816;-0.2698327324;0.054335050;0.033235098;0.007057821;  
0.818510834;-0.035398957322;-0.0629961754;0.844072690;0.735395054;0.031223537;  
0.825309088;-0.0239090329981;-0.0418967339;0.835166757;0.761731170;0.023804795;  
0.244385178;-0.037533857805;-0.2303083861;0.251777438;0.148721199;0.032257127;  
0.728279485;-0.057413706859;-0.1167966480;0.762750123;0.590681160;0.058845708;  
0.859454628;-0.059656913324;-0.1025491715;0.924433585;0.724603091;0.066055068;  
0.036694417;-0.006883980365;-0.2301033697;0.035756538;0.021074015;0.004810570;  
0.596399573;-0.062069832232;-0.1557878742;0.623291941;0.472363486;0.052644278;  
0.050662090;-0.011139560429;-0.2927101933;0.058158331;0.024830858;0.009301028;  
0.071530745;-0.008008482414;-0.1491630323;0.070013659;0.055811693;0.004475048;  
0.030141587;-0.004890247976;-0.1874195912;0.033392514;0.020025646;0.004276198;  
0.672233822;-0.055049613612;-0.1213770439;0.698319545;0.540239157;0.056098666;  
0.936901778;0.0155476000179;0.02349587832;0.964214563;0.924112546;0.012435098;  
0.102786074;-0.020469946354;-0.2889343290;0.115499744;0.064679483;0.016156092;  
0.633530305;-0.047784699958;-0.1113116856;0.627255100;0.558110451;0.025623120;  
0.193025257;-0.026466547099;-0.20151122051;0.192131506;0.141137920;0.016491675;  
0.499033064;-0.040679805808;-0.1201622672;0.502057951;0.407795129;0.033698182;  
0.029987961;-0.0044431257841;-0.16992577231;0.030181784;0.021072173;0.002864562;  
0.874034543;-0.050769030007;-0.0853264715;0.926453189;0.735312180;0.058013331;  
0.038172825;-0.0061477151921;-0.1969679380;0.041717075;0.024044142;0.005886452;  
0.634184435;-0.047769287498;-0.11115690307;0.688080456;0.511679599;0.051117104;  
0.063273576;-0.012867672773;-0.2786034786;0.060674090;0.039284299;0.007733493;  
0.339714303;-0.040519601342;-0.1776612044;0.353707386;0.248936843;0.039540327;  
0.298018857;0.0728910551638;0.30643115407;0.557188984;0.248775541;0.103868602;  
0.057773041;-0.013388697343;-0.3175201203;0.082712582;0.026537115;0.016248424;  
0.035323306;-0.007035440152;-0.2433658468;0.033534051;0.022378425;0.003707815;  
0.319514508;-0.033582014129;-0.1550738703;0.361331713;0.259642014;0.036598277;  
0.022788788;-0.003476003067;-0.1616725309;0.022321852;0.017082664;0.001488741;  
0.751747872;-0.029227004130;-0.0564437053;0.762979172;0.678487385;0.024902175;  
0.032167315;-0.005065847073;-0.1846488909;0.032332884;0.019645886;0.004080370;  
0.731583215;-0.058252494600;-0.1180246029;0.795684262;0.568261354;0.060927560;  
0.181942763;0.0461368554103;0.31076795331;0.289165151;0.134610375;0.053871041;  
0.034533849;-0.004461187296;-0.1522839665;0.037626030;0.024653114;0.003816440;  
0.028390405;-0.0042394939101;-0.1688217113;0.032406391;0.020297493;0.004066955;  
0.082915640;-0.009866096656;-0.1619492216;0.080622985;0.064681468;0.005553993;  
0.774774678;-0.047446481875;-0.0899715633;0.784604293;0.635247985;0.046842605

0.481665783;-0.0470800364794;-0.1452162595;0.476442122;0.371083806;0.037342224  
0.883676219;-0.021944813778;-0.03586854884;0.895907216;0.822044331;0.024539486;  
0.534784937;-0.0482192556772;-0.1337022565;0.566739258;0.433477402;0.039677644;  
0.529600490;-0.039537474515;-0.1097817506;0.538329232;0.446202161;0.029533282  
0.053403050;0.0307333808487;0.57020090680;0.160186258;0.037157876;0.044199975;  
0.562386532;-0.0472505449102;-0.12429866077;0.560106546;0.465619832;0.036915202;  
0.591758980;-0.061361547481;-0.15516494551;0.607889591;0.431758930;0.050139811;  
0.824956668;-0.048191563860;-0.0857683571;0.871448739;0.742681478;0.041483476;  
0.410622475;-0.039900120706;-0.1437866582;0.433782759;0.313723116;0.037304735;  
0.032664587;-0.005109398975;-0.18402686117;0.035965150;0.024436318;0.003727703;  
0.088652294;-0.021464507255;-0.3539800059;0.089791775;0.044455657;0.014097039;  
0.061048958;-0.015491810049;-0.3548409494;0.056927367;0.033497686;0.008090559;  
0.742022408;0.0399998539298;0.07476533114;0.835732052;0.724479308;0.033459697;  
0.171663459;-0.0279518857324;-0.2410424620;0.194583318;0.091488654;0.029592838;  
0.760957078;-0.034394164334;-0.0658417836;0.776493594;0.655205873;0.041817183;  
0.180844503;-0.0389332999784;-0.3291693635;-0.189228005;0.088672837;0.032623157;  
0.022895385;-0.0043282476034;-0.20352871621;0.022609147;0.015391735;0.003102883;  
0.364276796;-0.039048529375;-0.1589618049;0.386909365;0.238456456;0.046938630  
0.365688521;-0.0455816635307;-0.1866039265;0.363844765;0.260230099;0.033544274  
0.734613533;-0.067056901364;-0.1361503016;-0.777723809;0.588872050;0.064306749;  
0.833618817;0.0366660536179;0.06137919757;0.914975861;0.811597156;0.037171025;  
0.045373582;-0.007695105886;-0.2158597213;0.058853203;0.028882932;0.009102603;  
0.043172194;-0.008398205717;-0.2480111607;0.046904734;0.022082291;0.008234692;  
0.069989716;-0.0127081226957;-0.2496026587;0.069914782;0.038490686;0.011695104;  
0.703619261;-0.064357538234;-0.1363543971;0.752631267;0.530349652;0.075337639;  
0.433013427;0.0381618887421;0.11921220906;0.497539260;0.440985556;0.019107881;  
0.177867570;-0.030391234514;-0.25458100091;0.210491516;0.105262198;0.033044960;  
0.135229163;-0.031919345637;-0.3580583189;-0.136090702;0.083875029;0.016175095;  
0.047199046;-0.0086344434434;-0.2360859291;-0.048651847;0.028124774;0.007058632;  
0.211087497;-0.020749985498;-0.1421848608;0.211700023;0.174290049;0.011887755;  
0.085367125;-0.012103685170;-0.1958088638;0.087945069;0.055932953;0.011214231;  
0.501472980;-0.0388884117062;-0.11408550684;0.509133819;0.410016269;0.029381332;  
0.040768590;-0.006585304516;-0.2004354884;0.042343003;0.028017034;0.004496272;  
0.507739176;-0.049796168692;-0.14589265851;0.559700337;0.362352074;0.057603504;  
0.917078393;-0.016367754924;-0.02569860067;0.924995714;0.861755177;0.020170849  
0.911213607;-0.0162172428754;-0.02562372482;0.908458125;0.867422583;0.011706850;  
0.402799909;-0.033410772390;-0.1217642832;-0.422654394;0.316815220;0.031693030;  
0.023142431;-0.005191092790;-0.2457620680;0.022264778;0.014297009;0.002578929;  
0.881904117;-0.026298934187;-0.0431794860;0.892087423;0.801144420;0.032525615;  
0.044086388;-0.0074618430912;-0.2141759101;0.048009469;0.022692955;0.008194290;  
0.837411656;-0.0339062882622;-0.0589111075;0.869063744;0.744502386;0.037232331;  
0.674911387;-0.045547904377;-0.0992809993;0.670727291;0.581785965;0.033672646;  
0.088730303;-0.0237667072267;-0.39730279677;0.115950534;0.049637437;0.021430583;  
0.040232064;-0.006273109511;-0.1924514807;-0.041686984;0.028186620;0.004955566;

0.049381574;-0.008326048590;-0.2179482296;0.050657571;0.032631376;0.005394326;  
0.646678242;-0.058495818428;-0.1346011341;0.682558677;0.517454949;0.062133876;  
0.947975546;0.0178513155371;0.02663636767;0.973169874;0.962059578;0.003502657;  
0.029086202;-0.004852951938;-0.1912611352;0.032868263;0.020001194;0.004038658;  
0.037599321;-0.007754298074;-0.2565414632;0.037448304;0.024520842;0.003944491;  
0.800473691;0.0608647033802;0.10446776021;0.915611782;0.761155589;0.050488002  
0.051201847;-0.0101625415094;-0.26196649227;0.052627080;0.024205381;0.008550376;  
0.683066608;-0.057323442775;-0.12454996407;0.673568898;0.570778081;0.042668351;  
0.047155979;-0.008188549593;-0.2230819601;0.050945048;0.029661890;0.007003786;  
0.040234760;-0.0065480852467;-0.2014926855;0.040691658;0.025451476;0.005291129;  
0.407119503;-0.031651090139;-0.1138481252;0.414830197;0.337740987;0.021446735;  
0.050885401;-0.008254851873;-0.2101958919;0.050992558;0.034457527;0.007091488;  
0.444398173;-0.032824832266;-0.1081733966;0.451723553;0.385646014;0.020118928;  
0.168539524;-0.044872783083;-0.4176029463;0.197050747;0.079060121;0.037031773;  
0.142517647;-0.021238619154;-0.21633971731;0.137998478;0.092448276;0.012789716;  
0.374632606;-0.039515558917;-0.15639533011;0.376652499;0.282322751;0.030230995;  
0.602687930;0.0719193160950;0.16012413189;0.783230054;0.562059684;0.070935010;  
0.852648036;-0.0261202331404;-0.0443585633;0.869065135;0.791825196;0.025852377;  
0.304379743;-0.045812592650;-0.2272254075;0.319932549;0.183283706;0.046498968;  
0.799663227;-0.036735950499;-0.0669892755;0.820502757;0.680033683;0.043305869;  
0.052874364;-0.0081816825627;-0.2011241042;0.052321274;0.036149662;0.005663377;  
0.030114426;-0.0041840834664;-0.1589184634;0.031813066;0.022684756;0.003373757;  
0.082415705;-0.020990187664;-0.37169846037;0.089655620;0.046065037;0.014264602;  
0.047603339;-0.007567773348;-0.2031984988;0.050233269;0.028555899;0.007050113;  
0.053405511;-0.0153452654774;-0.39976421927;0.053088371;0.027262908;0.009457615;  
0.279621363;-0.0410010425567;-0.2202238053;0.357825180;0.183747570;0.056918927;  
0.093004262;-0.017766000604;-0.27313095854;0.103025445;0.064727237;0.011845002;  
0.035945680;-0.007455051278;-0.2554219771;0.041527825;0.020897375;0.006393048;  
0.162927861;-0.035520010952;-0.33170589724;0.174903386;0.054854054;0.044194055;  
0.662737582;-0.052779699412;-0.1178736474;0.715520765;0.519208678;0.062185538;  
0.040054819;-0.005780690667;-0.1770450664;0.042322542;0.027303211;0.005529221;  
0.924708220;-0.013664254418;-0.0212460570;0.933816348;0.881950281;0.016055669;  
0.108301195;-0.026537707933;-0.3664725237;0.130991561;0.057917209;0.022343390;  
0.055688092;-0.0189667821544;-0.4915511349;0.044092287;0.019389947;0.007442491;  
0.640604811;-0.040921004362;-0.09372026241;0.677531491;0.543384535;0.043267539;  
0.213004157;-0.030101463256;-0.20919731354;0.209474186;0.130752981;0.027614103;  
0.086594535;-0.0196733484617;-0.32856054912;0.085166514;0.053531555;0.012066176;  
0.378131851;-0.0428763590211;-0.1688824648;0.393168761;0.280579297;0.034040175;  
0.367066998;-0.067151667549;-0.2829467647;0.447557200;0.251763020;0.060932451;  
0.769745928;-0.0397616438494;-0.075509482510;0.777893027;0.684961059;0.034245464;  
0.055024224;-0.013117496096;-0.3250557270;0.055210195;0.033347246;0.008030449;  
0.058479203;-0.010050130794;-0.22897952824;0.056601374;0.037189599;0.006320023;  
0.433982516;-0.038326278589;-0.13024519272;0.440639671;0.362541450;0.027396725;  
0.811609493;-0.0330973111521;-0.0593198072;0.824203736;0.731500906;0.030306383;

0.046646035 -0.012698669604 -0.3661982914 0.046891961 0.021871873 0.009385703  
0.035914668 -0.005758617232 -0.1933377184 0.039414513 0.023440274 0.006269519  
0.033107556 -0.005701002067 -0.2046497063 0.036463957 0.017928332 0.006239328  
0.035765025 -0.004573358599 -0.1518929747 0.036331956 0.024098175 0.003842450  
0.046234083 -0.009934088853 -0.2804327867 0.060167900 0.026045309 0.010913517  
0.057223772 -0.009156432580 -0.2112445606 0.058695078 0.037246030 0.008255140  
0.062711520 -0.016752037422 -0.3778013313 0.057305495 0.035551518 0.008379666  
0.045324511 -0.012530776997 -0.3705192250 0.040676338 0.022594357 0.005522917  
0.019318714 -0.004073130748 -0.2157908136 0.019477605 0.011609539 0.002974483  
0.426275505 -0.070968046369 -0.2561282645 0.466873313 0.278700993 0.057647985  
0.071780166 -0.011903842904 -0.2269472946 0.091739328 0.046669894 0.013048418  
0.071260487 -0.016233282910 -0.3215106136 0.073607411 0.043102678 0.009679530  
0.045826106 -0.009262129115 -0.2617256436 0.047204789 0.024633963 0.007399965  
0.579747178 -0.047722065725 -0.1217369161 0.612650783 0.473752631 0.043156725  
0.921855351 0.0179028647800 0.02745425959 0.956282926 0.925382831 0.011483981  
0.749957827 -0.073694933584 -0.1471580103 0.813982326 0.503426414 0.099831540  
0.707875535 -0.038859770657 -0.0802886626 0.703835285 0.573458595 0.043247554  
0.713506921 -0.044587585123 -0.0917666430 0.717375039 0.613789030 0.039205560  
0.896001042 -0.028556208913 -0.0462042867 0.919868115 0.816908900 0.036483605  
0.769945037 0.0621711725136 0.11064687418 0.905646980 0.723836506 0.055732257  
0.017887224 -0.002951979875 -0.1614180006 0.018245832 0.010651628 0.002619006  
0.932403881 0.0158353498884 0.02404039898 0.966837393 0.909386331 0.017212263  
0.921976858 -0.013778917971 -0.0214889362 0.926875434 0.886039868 0.014290882  
0.056364419 -0.010123443658 -0.2387883367 0.064488974 0.033367491 0.008735330  
0.037788886 -0.008427552978 -0.2798960553 0.045077258 0.021309533 0.007481895  
0.497935738 -0.046489865953 -0.1384845557 0.518325448 0.420315046 0.032550508  
0.041871288 -0.014019236493 -0.4545646946 0.037636770 0.019188239 0.006079174  
0.079626345 -0.013750424811 -0.2402807553 0.073901980 0.053931760 0.006678633  
0.075746914 -0.015829191906 -0.2944265660 0.071996956 0.049764854 0.007349279  
0.032829099 -0.006039785185 -0.2193045559 0.032162187 0.022850120 0.003120788  
0.053678984 -0.008129548606 -0.1970450670 0.053819891 0.034514805 0.006306661  
0.028350330 -0.004009317604 -0.1593064165 0.028110716 0.018418390 0.003239881  
0.654763572 -0.039614144970 -0.0886402540 0.665701282 0.564785003 0.037078322  
0.848720879 -0.024124538278 -0.0411106748 0.859556018 0.800406565 0.019934131  
0.088147643 -0.025287328025 -0.4298203866 0.105685081 0.035566622 0.020653384  
0.861228255 0.0308988957435 0.05028004592 0.928255141 0.825729584 0.030532028  
0.175274429 -0.029957315843 -0.2544469798 0.202593119 0.095758563 0.032574691  
0.676163433 0.0598282530501 0.12060730800 0.795890497 0.646295640 0.049432045  
0.042409076 -0.009454644291 -0.2870096842 0.046854450 0.027217907 0.006150562  
0.051369951 -0.014499376935 -0.3888499612 0.051516062 0.024751646 0.008173525  
0.362605158 -0.034837863309 -0.1416180036 0.355475346 0.295286014 0.023325478  
0.553470632 0.0551358575342 0.13468154873 0.670486754 0.522770750 0.052339143  
0.764158120 -0.041446487335 -0.0793827431 0.774667177 0.678506649 0.035207325  
0.035107997 -0.007197866847 -0.2507998119 0.034641692 0.020672994 0.005178022

0.058691978! -0.011342394552! -0.2603586180! 0.070570675! 0.038161217! 0.009603676!  
0.456902637! -0.037738833417! -0.1215933348! 0.455760797! 0.383813759! 0.024322000!  
0.035598547! -0.005131571490! -0.1722428238! 0.043135348! 0.024534462! 0.005696301!  
0.023206430! -0.003688628910! -0.1698773728! 0.028268543! 0.013120389! 0.004256471!  
0.533083053! -0.039823857116! -0.1098712149! 0.527146302! 0.426819126! 0.028558379!  
0.664595503! -0.040058132595! -0.0883175684! 0.707357646! 0.558720929! 0.044493910!  
0.038015278! -0.005890298650! -0.1888175498! 0.042828177! 0.026304407! 0.006155704!  
0.729425702! -0.043979504623! -0.0884662854! 0.750298275! 0.619773962! 0.044855057!  
0.471118410! -0.047371218372! -0.1495375883! 0.507219889! 0.358194380! 0.052473120!  
0.630870994! -0.052302046297! -0.1228225452! 0.629251854! 0.475214842! 0.059481214!  
0.070925900! -0.008852376158! -0.1671321199! 0.069846055! 0.052488777! 0.005131920!  
0.606752241! -0.040571626041! -0.0981699293! 0.618194858! 0.489432034! 0.034551150!  
0.727814515! -0.039247257445! -0.0788591473! 0.759943184! 0.637222606! 0.038012831!  
0.758010783! -0.047885974143! -0.0928795969! 0.777705926! 0.659212467! 0.040080338!  
0.137394008! -0.021600928680! -0.2286253222! 0.130368373! 0.095211540! 0.012836045!  
0.134755618! 0.0289469513844! 0.26299975246! 0.206954775! 0.141291763! 0.024816738!  
0.051647775! -0.009221523906! -0.2337594395! 0.047208821! 0.031585073! 0.005226476!  
0.274966123! -0.027446601886! -0.1461086214! 0.273160273! 0.197365089! 0.024049657!  
0.330196404! -0.033811846641! -0.1510243078! 0.351639702! 0.251253564! 0.037245114!  
0.916174789! -0.015739078843! -0.0247273407! 0.926349456! 0.876580530! 0.017799512!  
0.174663618! -0.024102365086! -0.2017758778! 0.185467322! 0.130599546! 0.019223745!  
0.057712667! -0.011264901131! -0.2625092586! 0.077495829! 0.028614429! 0.014832196!  
0.112366096! -0.016301869193! -0.2062657372! 0.121886900! 0.069412141! 0.016740394!  
0.028831554! -0.004352616297! -0.1715141141! 0.034896108! 0.019371100! 0.005329222!  
0.618361003! -0.065630297710! -0.1591489615! 0.629028700! 0.476808476! 0.058499641!  
0.774396232! -0.040996143743! -0.0774437457! 0.807460332! 0.658795286! 0.044614220!  
0.852917537! -0.028260902663! -0.0480398819! 0.886410743! 0.785523634! 0.035731166!  
0.041407570! -0.006539358045! -0.1962871241! 0.049284133! 0.027950673! 0.006138444!  
0.050753617! -0.010456483310! -0.2724941121! 0.055010981! 0.028903018! 0.007069272!  
0.038748438! -0.006239378987! -0.1975856673! 0.044338787! 0.020721953! 0.007724696!  
0.523698067! -0.049883011665! -0.1415681222! 0.552455084! 0.411593326! 0.046514049!  
0.063141765! -0.017905879144! -0.4050895709! 0.057340949! 0.033355367! 0.007687842!  
0.044785152! -0.007591166449! -0.2151819296! 0.049734457! 0.028482604! 0.007267213!  
0.082766839! -0.017357560901! -0.2988671422! 0.089941090! 0.048625667! 0.012145472!  
0.055561141! -0.010257894698! -0.2454767900! 0.056183815! 0.031230168! 0.007925727!  
0.081848170! -0.010503024559! -0.1751947261! 0.076260617! 0.063170474! 0.004278977!  
0.034222247! -0.005661628357! -0.1976441303! 0.037272656! 0.016367948! 0.006717809!  
0.082133955! -0.013843348571! -0.2348937236! 0.083344786! 0.051046171! 0.010775426!  
0.636470575! -0.035968375554! -0.0825882123! 0.649172609! 0.572062282! 0.027665779!  
0.275670778! -0.034745426147! -0.1870952281! 0.271443999! 0.198747279! 0.025149522!  
0.070165369! -0.011119905391! -0.2154325043! 0.078975935! 0.044154731! 0.008901710!  
0.047875983! -0.009158322612! -0.2485199392! 0.044494355! 0.031833352! 0.004627989!  
0.597744519! -0.037502803771! -0.0918913956! 0.601098735! 0.495896441! 0.041000572!  
0.042470024! -0.007407011099! -0.2195496736! 0.042842670! 0.026177577! 0.005171426!



0.031294985 -0.007908607051 -0.3067069975 0.031614045 0.018788166 0.003978104  
0.618821998 -0.048399761379 -0.1155488962 0.647738338 0.497484814 0.047696811  
0.900790958 -0.019205270662 -0.0307465118 0.904969231 0.845020712 0.020491156  
0.028923772 -0.006478336366 -0.2626359835 0.030181811 0.015429496 0.004416452  
0.367650641 -0.052091906060 -0.2141343876 0.383178727 0.205924667 0.056965581  
0.405797054 -0.050628942616 -0.1873187500 0.434158279 0.293642802 0.048426129  
0.192461050 -0.026084058150 -0.1989820096 0.182557512 0.131701555 0.015726797  
0.038233324 -0.007746435112 -0.2525754457 0.043284661 0.023095204 0.007074008  
0.067742398 -0.009721112437 -0.1927153349 0.075044938 0.050148513 0.007770794  
0.508460341 -0.049680920600 -0.1453243996 0.520646910 0.339683027 0.054650292  
0.385491103 -0.064571790843 -0.2571657511 0.388843121 0.242981366 0.051693826  
0.259975474 -0.063782892798 -0.3888359242 0.302216678 0.144872883 0.044075292  
0.898473952 -0.021915535043 -0.0352294536 0.919553252 0.838895138 0.025007060  
0.033408091 -0.004915579743 -0.1733861771 0.042413256 0.020123971 0.006255005  
0.425934498 -0.029822610599 -0.1022341195 0.439292765 0.372597986 0.021959371  
0.576155113 0.206688215602 0.43575331448 0.923199333 0.273793268 0.198874080  
0.053945728 -0.010331995345 -0.2542453962 0.050994171 0.028237614 0.006668998  
0.041884648 -0.008407152480 -0.2550388843 0.048284752 0.023585416 0.007680084  
0.355023014 -0.042087216382 -0.1767400525 0.358587692 0.271724357 0.031041713  
0.048066379 -0.007019698548 -0.1858859227 0.049152772 0.030470791 0.006199048  
0.032986309 -0.006732806528 -0.2457568557 0.036256884 0.018177502 0.005277283  
0.019603948 -0.003201595531 -0.1651231013 0.022679108 0.013756765 0.002794789  
0.622547786 -0.055467508780 -0.1324024476 0.642311474 0.448422998 0.068944796  
0.059376113 -0.010142372439 -0.2280198143 0.056290675 0.042511548 0.004722681  
0.692560362 -0.057506933772 -0.1232035223 0.722071803 0.561308183 0.051478180  
0.136251306 -0.061403363339 -0.7854979220 0.110497180 0.048822380 0.020710788  
0.044737344 -0.007712258553 -0.2190948674 0.052462523 0.024861736 0.008416018  
0.496968544 -0.041598681650 -0.1235184506 0.482531897 0.387963562 0.030616644

| max.DA      | min.DA      | sd.DA       | diffmeth.p.val (Welch's t-test) |
|-------------|-------------|-------------|---------------------------------|
| 0.194714794 | 0.123219249 | 0.019807343 | 0.000113039148242169            |
| 0.073453261 | 0.034922162 | 0.010752983 | 0.000121653408648056            |
| 0.058927241 | 0.040873383 | 0.006625023 | 0.000138982836204649            |
| 0.068118692 | 0.037522355 | 0.010537844 | 0.0001859742928629              |
| 0.221593741 | 0.107406482 | 0.033986222 | 0.000243104600534497            |
| 0.044343168 | 0.024201196 | 0.005558411 | 0.000258411873712882            |
| 0.037673999 | 0.025665129 | 0.003783673 | 0.000267142044972077            |
| 0.065343144 | 0.051047165 | 0.005337240 | 0.000285136533999872            |
| 0.894105031 | 0.750981133 | 0.038152964 | 0.000296325684961978            |
| 0.041932456 | 0.022927441 | 0.006433255 | 0.000309332915541311            |
| 0.042322288 | 0.026463061 | 0.005242135 | 0.000330495830695972            |
| 0.031035333 | 0.021115199 | 0.003577638 | 0.000379806831804773            |
| 0.061376396 | 0.032052646 | 0.010014003 | 0.000391994431953747            |
| 0.891291274 | 0.824935309 | 0.019231959 | 0.000408080356572393            |
| 0.073413446 | 0.040513781 | 0.012164009 | 0.000455182455996829            |
| 0.031479724 | 0.019992892 | 0.003483115 | 0.000490669785530798            |
| 0.361610417 | 0.221836123 | 0.043180154 | 0.000492794652828944            |
| 0.043483223 | 0.026271408 | 0.006666281 | 0.000507871624212232            |
| 0.175216427 | 0.114932390 | 0.020313693 | 0.000522261063830755            |
| 0.240916759 | 0.104577866 | 0.047224880 | 0.000527443259687501            |
| 0.075837656 | 0.038569830 | 0.012048317 | 0.000541740208278194            |
| 0.790885264 | 0.559803375 | 0.064912409 | 0.000544194274203337            |
| 0.866099962 | 0.820095839 | 0.015783357 | 0.000544306602132412            |
| 0.063353968 | 0.033712933 | 0.008262963 | 0.000553813628802719            |
| 0.063651220 | 0.039336183 | 0.009169036 | 0.000557090186623979            |
| 0.071620520 | 0.026675308 | 0.012820547 | 0.000587559037741119            |
| 0.055439644 | 0.035198064 | 0.005881199 | 0.000606103895035033            |
| 0.650220410 | 0.569204044 | 0.022671633 | 0.000608274962484556            |
| 0.726955172 | 0.591404953 | 0.038734154 | 0.000625845124633777            |
| 0.052921326 | 0.029945914 | 0.007269543 | 0.000675561376767598            |
| 0.039892061 | 0.028169815 | 0.004000873 | 0.00068750647627362             |
| 0.925540661 | 0.796332743 | 0.035306636 | 0.000709048617889804            |
| 0.088805635 | 0.028519268 | 0.015342832 | 0.000713533022559394            |
| 0.572439415 | 0.500901563 | 0.020399766 | 0.000749842656988005            |
| 0.051213714 | 0.024188401 | 0.008347523 | 0.000758723515160631            |
| 0.292404130 | 0.216275853 | 0.024665460 | 0.000766253770651394            |
| 0.060046822 | 0.031879175 | 0.009043400 | 0.000773913816738574            |
| 0.541284309 | 0.356339816 | 0.059927884 | 0.000788973748059555            |
| 0.028182807 | 0.018961368 | 0.003518780 | 0.000803413463679023            |
| 0.054762688 | 0.037396845 | 0.005195609 | 0.000812319848539232            |
| 0.819925075 | 0.699773157 | 0.040766392 | 0.000829616694047564            |
| 0.554577224 | 0.448843256 | 0.031962610 | 0.000830965277828941            |
| 0.192810226 | 0.072824797 | 0.036062349 | 0.00084279775650268             |

0.090208330 0.038880840 0.018381986 0.000843684483359882  
0.030969469 0.018613472 0.003760845 0.000855492456776674  
0.077969289 0.047734359 0.009719063 0.000868625444884805  
0.327356088 0.259872917 0.017508109 0.000925398490107632  
0.075329860 0.049375222 0.008563647 0.000927316431401766  
0.385651499 0.191998933 0.066198151 0.000969376281948015  
0.137527237 0.084750443 0.017495869 0.00096939083576613  
0.082116026 0.047010479 0.012182541 0.000974295860128855  
0.098854518 0.068579869 0.010324650 0.000977327810837946  
0.219500172 0.108923186 0.033859498 0.00098178806052818  
0.124749604 0.044923200 0.023251957 0.000984448060730175  
0.052710291 0.031044896 0.006537816 0.000987206792171805  
0.145838631 0.041580329 0.030492366 0.00101306568348523  
0.065160068 0.030820839 0.010161346 0.00102058993253071  
0.485594689 0.339262512 0.041363090 0.00102096895367487  
0.035735868 0.024744417 0.003945115 0.00104069175450583  
0.085926673 0.065232390 0.006530475 0.00105420540447655  
0.062314118 0.029534419 0.011628906 0.00105541874024962  
0.063803524 0.035463911 0.008083424 0.00106323276640853  
0.073105514 0.041749253 0.010696126 0.00107496677697312  
0.070128204 0.029633636 0.012045607 0.00112445792703832  
0.024846924 0.017487400 0.002687944 0.00113562487103266  
0.059471579 0.032698634 0.009883422 0.00115312884844364  
0.119499293 0.041385317 0.022446943 0.00115804258730953  
0.049887259 0.031675014 0.006512415 0.00117656448797155  
0.053355773 0.030693181 0.009070251 0.00118363713104641  
0.089393488 0.032751890 0.017194011 0.00118451267548521  
0.055282341 0.031151323 0.007218462 0.00118953750025623  
0.059679615 0.040924323 0.006570492 0.0011924599436537  
0.655835965 0.459199117 0.062581409 0.00119720097261188  
0.397314671 0.292227331 0.035845999 0.0012337894833502  
0.861689566 0.776289706 0.027689525 0.00126966211837448  
0.070544107 0.033599421 0.010533702 0.00128769561369495  
0.760093447 0.599825595 0.055283313 0.00128840711645545  
0.260650104 0.180805706 0.028444852 0.00129297604085156  
0.025340662 0.017175144 0.002931160 0.00133008812067979  
0.335231852 0.165755420 0.053971114 0.00133841688587573  
0.109556014 0.042981684 0.016976780 0.00134993660044481  
0.067543268 0.034349164 0.012048127 0.00136567305577178  
0.414830497 0.282766109 0.049355205 0.00141362596853781  
0.543296042 0.338693723 0.062418206 0.00143358106389391  
0.058664882 0.045601885 0.004853986 0.0014892106276354  
0.154669188 0.114059798 0.012570117 0.00149903843208819  
0.028265425 0.018478710 0.003132783 0.00150273713853608

0.089894904|0.027221383|0.015896927|0.00151086225826175  
0.052174389|0.025047125|0.007834071|0.00151767355655841  
0.026314032|0.017221274|0.003093156|0.00153182740537096  
0.583125517|0.463779891|0.047055743|0.00154684878553392  
0.097865089|0.045688443|0.015773627|0.00154989667077514  
0.034830927|0.023053710|0.004355427|0.00156263448726686  
0.061128727|0.026294228|0.011814902|0.00157587747225527  
0.110951681|0.068438414|0.013361114|0.00158670511017001  
0.872458866|0.829864494|0.016751331|0.001610819262709  
0.095862731|0.066614680|0.011093482|0.00164169454319419  
0.240926234|0.162859241|0.021058662|0.00169218417666731  
0.069642836|0.031310531|0.010403171|0.00169294600199711  
0.036874274|0.021969133|0.004820181|0.00169383939603919  
0.058333410|0.025679396|0.008359387|0.00169642275990433  
0.165395348|0.095513438|0.021120018|0.00170594259078683  
0.050564366|0.023657191|0.007406784|0.00171827777076177  
0.585226415|0.377766015|0.068238127|0.00172514614188101  
0.022542046|0.016036788|0.002003249|0.00175922081220627  
0.053108234|0.028377452|0.007541625|0.00177172025810803  
0.094662207|0.054458471|0.013680090|0.0017725775108131  
0.086708049|0.049960563|0.012213099|0.00180441082449474  
0.065139584|0.022078567|0.012030175|0.00180968989963743  
0.054431431|0.025577961|0.007902018|0.00182480656486792  
0.068906904|0.044282837|0.007953787|0.00183981121596407  
0.053625867|0.023234232|0.010693802|0.00184046533575476  
0.160177331|0.090219275|0.023439490|0.00185619344740518  
0.101633676|0.057822870|0.012809565|0.00187034186660992  
0.594208660|0.421639970|0.054906863|0.00190814525564818  
0.161441874|0.092095404|0.019374213|0.0019116459804831  
0.039683778|0.025333436|0.004639013|0.0019131856681027  
0.244881477|0.057622665|0.054945679|0.00191345500942755  
0.032336084|0.017001499|0.004871655|0.00193383845838344  
0.533229749|0.412597001|0.036586135|0.00193603149936682  
0.038728777|0.022878643|0.005138124|0.00194096165539767  
0.301572327|0.189894120|0.034571149|0.00195477958028191  
0.046306502|0.026404120|0.006249213|0.00198007364991104  
0.094320647|0.056168527|0.010156189|0.00201103006539155  
0.042757706|0.024704612|0.005832756|0.00201487901596428  
0.253491394|0.097577860|0.049403291|0.00201713836369913  
0.086473605|0.056312188|0.008224916|0.00204797759358084  
0.034844214|0.019862412|0.004182153|0.0020669515059148  
0.083246076|0.044074797|0.011217739|0.00206810141768003  
0.052564813|0.034595753|0.005387089|0.00211735119198062  
0.698758849|0.600297999|0.032185910|0.00212503789003225

0.133789336!0.095709422!0.012461084!0.00212894002090623  
0.082774004!0.047411241!0.010730444!0.00214991943971281  
0.036146233!0.023774744!0.004419895!0.0021654151135924  
0.069059242!0.029258349!0.013746801!0.0021774019676957  
0.092737746!0.042214087!0.016218125!0.00218165881781463  
0.083794293!0.055017319!0.009278062!0.00218336979597717  
0.067696794!0.029678857!0.011477867!0.0021871068919103  
0.140446542!0.054141494!0.025011875!0.00219890806716959  
0.049634235!0.030042345!0.006179039!0.00220826133500541  
0.070714579!0.043286088!0.007840829!0.00221334149575934  
0.062628862!0.035099924!0.010161078!0.00221983324204917  
0.101051581!0.036054051!0.019657757!0.00222010319458213  
0.075327886!0.035862938!0.012763389!0.00223253058693142  
0.039560945!0.028224193!0.003163054!0.00223309075280581  
0.083692376!0.033058126!0.013662760!0.00224350264698155  
0.035033597!0.020677017!0.004696555!0.00224723641856131  
0.041297962!0.029161412!0.003503148!0.00224866469677349  
0.072008240!0.039925376!0.010302607!0.00225410750682669  
0.066555003!0.035380301!0.011466156!0.00226592406854671  
0.049470007!0.024431873!0.007175270!0.0022680094773206  
0.158308441!0.088960313!0.023140724!0.00227387660528469  
0.791014615!0.596792052!0.054078662!0.00231552210910848  
0.097072598!0.049766182!0.014766305!0.00231742577180607  
0.290506614!0.194718203!0.031339958!0.0023343968261777  
0.150239382!0.058923915!0.029111203!0.0023365613586663  
0.047188071!0.029197702!0.005655553!0.00234896269743094  
0.052134571!0.032703893!0.006546225!0.00236458494949065  
0.323335854!0.219642403!0.030760576!0.00236978546467638  
0.070275143!0.039137782!0.008930673!0.00237484363721179  
0.066866638!0.038368190!0.009827354!0.0023795997325079  
0.814845911!0.689841151!0.031768220!0.00238736051826148  
0.062618541!0.027417725!0.009741207!0.00240325447415339  
0.796733736!0.662918480!0.036248465!0.00240811418968543  
0.064154719!0.034640512!0.008810026!0.00241032794101831  
0.148547521!0.049609605!0.027843722!0.00241244516237452  
0.072022444!0.038372756!0.009860103!0.00241265981562073  
0.202462737!0.127568316!0.021019896!0.00243139308918182  
0.880019248!0.775027930!0.034527793!0.00245004834628624  
0.031813235!0.021258391!0.003823125!0.00246408516613807  
0.038424629!0.019807169!0.004877558!0.00246845875986259  
0.722453432!0.615204029!0.035197309!0.0024705952601324  
0.104258781!0.048275865!0.017845791!0.00248379311972846  
0.468465174!0.344052365!0.046436150!0.00250227548793421  
0.061253113!0.033018485!0.009403655!0.00256267967317984

0.057099389|0.030187891|0.008955606|0.00257409596428539  
0.529866520|0.385782531|0.055417428|0.0025796308843903  
0.072869892|0.035878909|0.012811141|0.00259407133157125  
0.172652518|0.075086286|0.028083075|0.00259697885491222  
0.030469539|0.021194955|0.003216522|0.00262039504932314  
0.087768924|0.047005438|0.012799343|0.0026287156385196  
0.053816535|0.027320951|0.008148811|0.00263695891880557  
0.075155976|0.022685059|0.014515591|0.00265030035494283  
0.059674895|0.030111932|0.009168767|0.00266146255930512  
0.044622288|0.022637720|0.007129332|0.00268813265324264  
0.075603994|0.032772053|0.013027587|0.0026949288230359  
0.904440386|0.874176520|0.011812853|0.00270230363483098  
0.082777557|0.026327844|0.017425923|0.00273885222601302  
0.056760114|0.033354155|0.006587670|0.00274924194078208  
0.037801937|0.025609062|0.003827714|0.0027502568444486  
0.274556613|0.207973956|0.023104615|0.00277122899886265  
0.065041428|0.031499006|0.010117611|0.00278044034424552  
0.090443028|0.048027090|0.012827689|0.00278538646727073  
0.039593952|0.027061822|0.004387549|0.00279159676704469  
0.071382693|0.036015100|0.010127194|0.00280572760224556  
0.113152061|0.068725544|0.014742717|0.00281547610459957  
0.089284041|0.060913085|0.010233332|0.00281821605678084  
0.466181940|0.347269524|0.039881695|0.00284306099622626  
0.110349313|0.061059129|0.012778032|0.00287191925559513  
0.263518463|0.178161259|0.026533525|0.00288255035592751  
0.043126982|0.026230040|0.005571858|0.00289587208366267  
0.046258418|0.022413197|0.007228665|0.0029065750127275  
0.145210024|0.082548608|0.016592077|0.00292408029622293  
0.054502571|0.026634518|0.007632536|0.00294416615470123  
0.054195422|0.030427623|0.007136933|0.00294562555501283  
0.027760361|0.013299352|0.003973354|0.00294865903720879  
0.052361257|0.033971892|0.006013867|0.0029513618519065  
0.062239882|0.030849706|0.011143263|0.00296968121273305  
0.038618213|0.024143750|0.005287589|0.00300552946493553  
0.600198368|0.424144398|0.044474131|0.00302816354873669  
0.053115556|0.031363630|0.007313837|0.0030328128205544  
0.061030728|0.027826313|0.011522228|0.00304934961872634  
0.045546464|0.023705208|0.007381302|0.00309556907307194  
0.574218638|0.329175891|0.087825762|0.00310453744471941  
0.094050444|0.024324639|0.020072476|0.00312969321262142  
0.032979304|0.019945674|0.004262718|0.00313073373276736  
0.222120293|0.134997218|0.031119622|0.00316387634229068  
0.061175648|0.038209742|0.008606189|0.00316714302432326  
0.116074190|0.049811294|0.021399677|0.00317616495823966

0.033335323 0.020000712 0.004669787 0.00318612157961868  
0.033784297 0.021501998 0.004976329 0.00318954288837845  
0.179062561 0.118755620 0.020796541 0.00319103447082353  
0.041533754 0.030834559 0.003236965 0.00322057807206055  
0.381018012 0.291904290 0.026823887 0.00323510866011218  
0.134736041 0.099122553 0.012728709 0.00323833874955956  
0.082561626 0.063954883 0.006948573 0.00325258610757589  
0.198011800 0.100708950 0.037887089 0.00325492034246817  
0.364607944 0.253081186 0.035345403 0.00325635311760933  
0.140774316 0.052923579 0.026095565 0.00329084892590186  
0.308074416 0.175105830 0.043388666 0.00330832710830921  
0.086059912 0.019735773 0.020700251 0.00331894456315596  
0.332778822 0.261174025 0.024314278 0.00333507975565938  
0.051014157 0.029928444 0.006565744 0.00333730802638546  
0.095934445 0.056236963 0.011256355 0.00340492430345237  
0.738447095 0.613835379 0.041120111 0.00342640364098964  
0.028245657 0.017580337 0.003205804 0.00343257381734118  
0.052775410 0.034307552 0.007302082 0.0034595118595006  
0.028910550 0.017457640 0.003984612 0.00348197718459  
0.896168091 0.776471944 0.043058777 0.00349166293366654  
0.103370907 0.066859472 0.013426385 0.00349513633883917  
0.055985002 0.032798163 0.007763421 0.00349736304710893  
0.065655610 0.038951994 0.008682690 0.00350194740911007  
0.087848491 0.057014167 0.008558271 0.00350618543895467  
0.509026049 0.337447999 0.049086840 0.00351230835712199  
0.058185893 0.041932902 0.004786600 0.00351413083489978  
0.086799735 0.043254122 0.013721558 0.00351777015543056  
0.841032129 0.749323029 0.025290486 0.00352905097553154  
0.909486727 0.831328303 0.025803421 0.00353105787157745  
0.046799012 0.026264611 0.006212192 0.0035354836092213  
0.069333724 0.029292696 0.012815685 0.00354713366497667  
0.247577370 0.115147211 0.040905359 0.00356606388029113  
0.520797601 0.396211168 0.040591885 0.00357473651488945  
0.079070226 0.041580310 0.010843499 0.00357658346095944  
0.830850458 0.681038687 0.057057085 0.00357954916282163  
0.065308752 0.027189152 0.011625842 0.00358038828993157  
0.103260313 0.062196225 0.012556461 0.00360058301432309  
0.102123726 0.055336899 0.012942339 0.00362176512351882  
0.773598321 0.661948267 0.038012533 0.0036234438823891  
0.179221324 0.061207212 0.043580045 0.00363266046489384  
0.073783845 0.039226228 0.011073067 0.00364937323810705  
0.099076785 0.045321856 0.015584236 0.00366769729556217  
0.049626832 0.026772875 0.006867594 0.00371532828635992  
0.785829179 0.674628894 0.033452184 0.00374301991937087

0.205397498|0.085238352|0.035785740|0.00375055394818059  
0.174837603|0.057714530|0.041873274|0.00376537170869193  
0.206783720|0.121882188|0.024647331|0.00377076314342481  
0.084853337|0.043092084|0.013146983|0.00379488632536217  
0.580857279|0.340273220|0.084192120|0.00380934850334658  
0.697897971|0.565300996|0.036771923|0.00382347517924885  
0.158719192|0.051720039|0.032136293|0.00384482308752761  
0.876879458|0.753224464|0.040603945|0.00388042624768213  
0.072670875|0.035118253|0.012685626|0.00388296356655818  
0.162668083|0.125747713|0.011908474|0.00389193522720608  
0.049296087|0.025810067|0.007793650|0.00389980395064121  
0.756179856|0.565034505|0.061113519|0.00390180490083364  
0.070066738|0.034841035|0.011137602|0.00391125748012812  
0.043265627|0.020807775|0.006520817|0.00391690208557112  
0.026895706|0.016740295|0.002999640|0.0039263013050613  
0.865180409|0.764498188|0.037627032|0.00392656087478859  
0.017959966|0.012651809|0.001530969|0.00392889630145345  
0.388668223|0.280991538|0.033586053|0.00394591472166495  
0.841485020|0.755583564|0.032226000|0.00396731733406187  
0.068832781|0.041187024|0.010237682|0.00396816777265341  
0.368356059|0.221810692|0.050452019|0.00397241159245836  
0.066654684|0.027944223|0.010683816|0.00398542821149386  
0.026611995|0.015749748|0.004013957|0.00401954616173316  
0.134004617|0.054767956|0.021294754|0.00402086889564885  
0.073012472|0.043516750|0.010246454|0.00402910171665316  
0.185628735|0.052299490|0.043524531|0.00403612029446587  
0.841226019|0.370596606|0.211382411|0.00404585246722504  
0.030775086|0.019248194|0.004507489|0.00404655225059499  
0.372146894|0.154428310|0.072042939|0.00406307090349173  
0.126802867|0.046181300|0.021152393|0.00407477368164635  
0.114155662|0.079962078|0.011121290|0.00407490154469958  
0.111162065|0.048788569|0.019341531|0.00407772267257447  
0.047999510|0.026832933|0.005994501|0.00408826001033943  
0.086646248|0.045968319|0.012724848|0.00413403180479398  
0.071995445|0.046187891|0.008488859|0.00415035944327746  
0.856828234|0.699106069|0.051001412|0.0041550186913791  
0.061214683|0.036817796|0.009229419|0.00420622620652818  
0.256634100|0.140326287|0.035654314|0.00422099204004627  
0.113213691|0.038598896|0.022473824|0.00423070902559191  
0.085748962|0.045426060|0.013453778|0.00424168505460603  
0.058916133|0.019444039|0.010920144|0.00424938386331631  
0.399893518|0.327499443|0.025890633|0.00424940857530124  
0.046451663|0.027138862|0.005798533|0.00427232511402829  
0.063796500|0.019432518|0.014125904|0.00428281049462324



0.048992216!0.023684534!0.007926449!0.00428443086992252  
0.170344181!0.118714404!0.017931017!0.00429379363837408  
0.627314990!0.500336854!0.045966013!0.00429556436140157  
0.031679970!0.015437702!0.004509794!0.00430336887310071  
0.610569281!0.444574248!0.053607360!0.00433369882194643  
0.049575368!0.032141294!0.006456037!0.00433650301011608  
0.128985428!0.053369972!0.024449991!0.00433743272126697  
0.104003470!0.034888553!0.022078139!0.00436176006084984  
0.532896771!0.404678640!0.044172688!0.00437074950432081  
0.059852206!0.043405565!0.006545151!0.00438675377732306  
0.087633509!0.057150474!0.010439217!0.00438728975970797  
0.043340078!0.023582602!0.006546102!0.00439005511764653  
0.430489181!0.298698807!0.045522356!0.00440847162959311  
0.056877010!0.025896324!0.009737850!0.00441314402720725  
0.190811415!0.046348798!0.039591806!0.00445838854454751  
0.407834084!0.325622042!0.027114642!0.00446518505303296  
0.035350489!0.020772299!0.004467290!0.00451681085367011  
0.194076836!0.119881482!0.024650738!0.00455716949207176  
0.035567483!0.018924732!0.005051029!0.00456092463860636  
0.069801415!0.036950612!0.009293713!0.00458304421326124  
0.092675007!0.053660943!0.012521709!0.00459152880408001  
0.167627124!0.059500315!0.031100553!0.00460891083216263  
0.059121886!0.029243976!0.010540631!0.00460917435799224  
0.619630766!0.373063636!0.089063752!0.00462717425348471  
0.084365271!0.046458959!0.012096306!0.00463381199326409  
0.850213667!0.752392253!0.031255659!0.0046459925878622  
0.119931427!0.048704438!0.024061022!0.00468365145594982  
0.091019361!0.034907162!0.019042869!0.00468386764533187  
0.440254190!0.358840458!0.029786865!0.00469728191952805  
0.289644736!0.124081507!0.055823110!0.00470510980679738  
0.068969688!0.045943789!0.007637441!0.00471159512923866  
0.053287442!0.022636427!0.010130712!0.00471613907363878  
0.075635716!0.046658535!0.008071997!0.0047212137837253  
0.063100446!0.032995889!0.010153703!0.00472146677480461  
0.074718978!0.046638416!0.009837299!0.00473987576252708  
0.082983170!0.052954851!0.008828104!0.00475192757879273  
0.065827529!0.036218646!0.008565542!0.00475388541911821  
0.045303111!0.023297841!0.006877437!0.00477049418265  
0.222545528!0.148452840!0.023909900!0.00478126053789934  
0.049225400!0.024285726!0.008235310!0.00478143406239886  
0.157671450!0.120578362!0.015807845!0.00479368071217885  
0.044091131!0.029797882!0.005377475!0.00480944041788994  
0.064708348!0.028475280!0.011771309!0.00486399776189585  
0.035493348!0.017752445!0.005145137!0.00486504552906888

0.035719396;0.023542846;0.004964278;0.00487880158059995  
0.082283730;0.032716088;0.014946811;0.00487927570547844  
0.052501159;0.032069904;0.005870966;0.00491054363781752  
0.074799836;0.031763643;0.013010442;0.00493227005158406  
0.490881807;0.360288159;0.044572858;0.0049360791314476  
0.052594688;0.028750200;0.006509399;0.00494216257464459  
0.207198060;0.074070570;0.040199278;0.00498363564234946  
0.122215391;0.043802950;0.030972228;0.00502572315636458  
0.073672026;0.038159271;0.010470147;0.00502574355684366  
0.816965566;0.722724215;0.027394094;0.00502770283089389  
0.599408835;0.451455491;0.045785411;0.00503026769149639  
0.046854457;0.024075207;0.006668374;0.00503080851913635  
0.059831109;0.042425462;0.005999809;0.00506114617254402  
0.426221807;0.271524214;0.051968936;0.00506238845985886  
0.078537838;0.046640756;0.008471615;0.00508374498260781  
0.270061747;0.177828975;0.030910995;0.00509641933960355  
0.071403716;0.029487707;0.013164081;0.00509757419418474  
0.057063232;0.024745278;0.009449645;0.00511375171174573  
0.110837908;0.079399483;0.011084946;0.00512383899648954  
0.042939043;0.020871258;0.006119501;0.00513591933519513  
0.322450001;0.263403480;0.017996042;0.0051383069663515  
0.083690934;0.058505540;0.008314906;0.005154263032324  
0.057130839;0.036510074;0.007166801;0.00518686002111374  
0.047714535;0.019068841;0.009494092;0.00519962197526463  
0.139509352;0.081350038;0.017519451;0.00525157245542939  
0.563007725;0.333491240;0.071718111;0.0052558445203256  
0.079235438;0.026609294;0.013453449;0.0052717981671616  
0.028855785;0.015909354;0.003880479;0.00529576482162504  
0.887331466;0.788595240;0.034689503;0.00532885390521587  
0.037514826;0.021614659;0.004826305;0.00533354277603353  
0.142062608;0.034638611;0.031327516;0.00534993127455842  
0.023729442;0.014678307;0.002784333;0.00535207927519788  
0.125337017;0.045137757;0.025895318;0.00536564742610911  
0.067690500;0.029202288;0.010633989;0.00536722327413683  
0.059107083;0.032801237;0.008243656;0.00537199154748008  
0.080607524;0.050394176;0.008696531;0.0054148351941628  
0.359036390;0.278986778;0.023704820;0.00541711098048267  
0.072257184;0.040905624;0.010909710;0.00541953437710872  
0.067613116;0.036819264;0.009758214;0.00543903417079848  
0.913724544;0.838729097;0.022910506;0.00544366712547056  
0.483793116;0.330772180;0.039393987;0.00547442588627545  
0.044814439;0.022500572;0.006607208;0.0054777554418694  
0.052399321;0.023106587;0.008792096;0.00553963874965274  
0.050906671;0.025645749;0.007626168;0.00556127372824254

0.025954311|0.017313251|0.002690768|0.00557974862519997  
0.835607693|0.710820446|0.041453532|0.00562451111575936  
0.059644522|0.029931425|0.008483354|0.0056347764749564  
0.606188596|0.482528491|0.043374816|0.00563901644996064  
0.531342820|0.381225323|0.046102023|0.0056446529240323  
0.405264851|0.313131200|0.030080262|0.00564533533043482  
0.108469715|0.038894486|0.024019771|0.00569452951221751  
0.054830902|0.033910913|0.006390210|0.00570957568313116  
0.456072706|0.255448122|0.063278300|0.00571612908183751  
0.460023824|0.308214208|0.054958999|0.00573489269931867  
0.914403600|0.794715384|0.035108579|0.0057412785369628  
0.268827956|0.187493261|0.024996849|0.00575516427443028  
0.566233579|0.379865309|0.053880034|0.00577269772686169  
0.155141257|0.065802936|0.028763570|0.00577504957988314  
0.495696807|0.352684526|0.041476187|0.00578505303186341  
0.040901755|0.022699438|0.005358216|0.00579750586591848  
0.043128522|0.023482623|0.006912450|0.0058753256073927  
0.235766968|0.108569649|0.040345576|0.00589082474378987  
0.053751853|0.033868072|0.006237034|0.00589103808608477  
0.711078487|0.562183115|0.052301048|0.00589844998699919  
0.116435759|0.035278006|0.024683755|0.00590395633689798  
0.795650223|0.564195413|0.074154144|0.00590870346965047  
0.057656779|0.029007249|0.008168142|0.00592521358072568  
0.053155083|0.023803158|0.010372330|0.00592525111328579  
0.091219819|0.060229129|0.008763299|0.00592899647755205  
0.731892731|0.549681684|0.058727587|0.00593773437039676  
0.166168494|0.090592570|0.021635125|0.00593881856746527  
0.038052393|0.017478066|0.006937495|0.00595737006093477  
0.320824105|0.254674191|0.018923392|0.00595786172023527  
0.376550931|0.259234692|0.032144203|0.00595864729209861  
0.062967740|0.038980140|0.007035270|0.00596635861097705  
0.081067617|0.052875770|0.008176040|0.00598528894286953  
0.036338116|0.021778681|0.004203970|0.00599935139036633  
0.045021840|0.025035338|0.007480423|0.00601331394405867  
0.059072476|0.044463069|0.005576553|0.00603681531605514  
0.381303001|0.250439764|0.039852044|0.00611012216575426  
0.101486721|0.039549561|0.018481333|0.00611303057960649  
0.042178690|0.024002220|0.005261787|0.00613168083165697  
0.846849029|0.778167979|0.020957017|0.00615827239519192  
0.033921501|0.019964297|0.005498097|0.0061590562532082  
0.042115757|0.026097067|0.006098410|0.00617078320235787  
0.050916773|0.031697823|0.007989611|0.00617842763903714  
0.052918665|0.035832139|0.006348942|0.00621722863917897  
0.061996570|0.031562426|0.010453354|0.00627191469606662

0.852228515 0.757114476 0.033392509 0.00630718373644656  
0.066179684 0.033434489 0.009558712 0.00634404464808058  
0.081907991 0.030822692 0.015138796 0.00634891766266824  
0.374054664 0.332313602 0.013918685 0.0063540645369776  
0.874838330 0.817205920 0.016440463 0.00637108813104732  
0.321792589 0.267030871 0.020156104 0.00638085917275261  
0.084940634 0.034328562 0.014742470 0.00638649744209054  
0.100358369 0.029237313 0.021491346 0.00638917045128378  
0.231676781 0.063736016 0.047525804 0.00639560439979331  
0.055538562 0.031282489 0.008752642 0.00640731803244366  
0.489634537 0.401860674 0.026579854 0.00643328875837078  
0.541193609 0.415676457 0.041143990 0.00643905504549668  
0.209711714 0.102750158 0.036350896 0.00646367931059652  
0.059038246 0.025112657 0.010224037 0.00646442712792225  
0.043144708 0.023914789 0.005564673 0.00647619468491854  
0.031792108 0.020606847 0.003767907 0.00650107448716736  
0.034794540 0.020845986 0.004996777 0.00651827503322916  
0.057388507 0.025491568 0.008822279 0.00652751094663376  
0.036102878 0.026500372 0.003098126 0.00655319803831692  
0.214657160 0.047068088 0.047383379 0.00658983464765955  
0.162710431 0.056404882 0.030673589 0.0065952145598912  
0.041298189 0.023504146 0.006036679 0.00660479605986581  
0.055908251 0.024866532 0.008483214 0.00662310302431072  
0.046169078 0.015658158 0.008281184 0.00665672129904411  
0.132779302 0.053950978 0.027822324 0.00668205068300251  
0.096381919 0.048316590 0.015339382 0.00669077877654853  
0.671287398 0.034184886 0.241848596 0.00672939385887575  
0.037414326 0.024825276 0.004245643 0.00675675973693046  
0.857112706 0.728902514 0.039072103 0.00675972519338566  
0.094025553 0.051179484 0.011238132 0.0067640229870752  
0.076155285 0.032239427 0.014815091 0.00677194447324025  
0.055663948 0.030086111 0.007593597 0.00682134612589047  
0.176376502 0.087766769 0.029513286 0.00684979052658751  
0.049351089 0.029634975 0.007022348 0.00689190796177299  
0.036483299 0.027107987 0.003767965 0.00690694149487769  
0.118222040 0.069628294 0.017146112 0.00691063713680937  
0.385535483 0.273891714 0.032630858 0.00694798355414541  
0.496208387 0.394727864 0.034159121 0.00697316685831498  
0.407136184 0.200212551 0.060453953 0.00699541865067027  
0.021286230 0.013947129 0.002300541 0.00706138761203326  
0.391468180 0.243348658 0.044385718 0.00706578441865508  
0.103425315 0.079366210 0.007341613 0.00708523437253316  
0.374914894 0.201698110 0.052011596 0.00708987232979229  
0.903202424 0.835340426 0.024833489 0.00711304886952598

0.722668449 0.630175481 0.031361718 0.0071934840622722  
0.070256261 0.029318257 0.011675404 0.00719958471815058  
0.045823657 0.024028823 0.008185958 0.00720394675286071  
0.690759619 0.507014977 0.069280129 0.00720744674972207  
0.043638438 0.025555582 0.005997834 0.0072169235998884  
0.836009434 0.504157560 0.097086323 0.00726554600400863  
0.258095211 0.105883006 0.059664059 0.0072798972270034  
0.930379214 0.877257778 0.016545992 0.00728229148787424  
0.636159630 0.446094773 0.049829509 0.00730248710294393  
0.613175264 0.522404118 0.031327929 0.00730440546707238  
0.391786382 0.204914811 0.050498507 0.00731162749209317  
0.808531950 0.614333732 0.051632024 0.00731593373735447  
0.047051796 0.025244717 0.007531635 0.00732094155290743  
0.040497078 0.024428850 0.005489641 0.00732169858122512  
0.932661925 0.885886351 0.015499425 0.00733335280626413  
0.084299830 0.035609175 0.016294181 0.00739710184853364  
0.054140667 0.031208619 0.007368883 0.00740167919634014  
0.428167741 0.327872774 0.033837967 0.00740643932305006  
0.051094552 0.030997844 0.006235197 0.00741669138049169  
0.063395500 0.035616483 0.008641401 0.00744420734664348  
0.362397875 0.296126182 0.024629606 0.00745891809228133  
0.252828913 0.058409885 0.064592045 0.00746894291536695  
0.134557330 0.045569205 0.024818825 0.00747320478774213  
0.043958157 0.032548396 0.004222000 0.00750284930530078  
0.020917330 0.016077016 0.001618261 0.00751686016463359  
0.030272718 0.019721963 0.003654321 0.00753365117294037  
0.053506557 0.028420174 0.008333323 0.0075372411510572  
0.043865851 0.027358437 0.005624562 0.00757738243657659  
0.926951495 0.874761860 0.016521832 0.00758595968341191  
0.032566965 0.025714430 0.002359176 0.0075869790996839  
0.926390700 0.900405350 0.008604162 0.00761641500860462  
0.900752643 0.802149163 0.025731487 0.00762437081703307  
0.365742395 0.242816241 0.039626456 0.00763372809427691  
0.196491885 0.073098591 0.041441326 0.00764163144408528  
0.286654500 0.214433085 0.023234147 0.00766418455044351  
0.569647632 0.479489620 0.026996631 0.0076760477540698  
0.082341081 0.047513717 0.012844042 0.00767879359319268  
0.148414174 0.106749244 0.011860118 0.00768029251049111  
0.918027367 0.828213201 0.026596449 0.00769025907220953  
0.377320849 0.299127864 0.025711121 0.00769107513746288  
0.029748016 0.019053987 0.003923863 0.00771682843199748  
0.053981275 0.035881809 0.006340728 0.00773204037188243  
0.027430753 0.017886335 0.003206590 0.00774008123521178  
0.650641001 0.480253803 0.056396921 0.00776401194586484

0.026213993|0.019212444|0.002676799|0.007778033|11686698  
0.045340004|0.027363019|0.005818528|0.007780031|108302333  
0.625496477|0.501568586|0.040879782|0.007787114|50128389  
0.093246878|0.053829608|0.013735005|0.007807853|1862844  
0.034669280|0.021080507|0.003898748|0.007808395|23559986  
0.910662296|0.774810111|0.039316475|0.007811055|10948452  
0.223665808|0.146201504|0.022971596|0.007837744|33176877  
0.047110208|0.027177409|0.007113096|0.007837757|94044591  
0.041168262|0.024764161|0.004365831|0.007875643|80951395  
0.297231483|0.246604196|0.015134447|0.007910212|54700059  
0.034631708|0.024749890|0.003319699|0.007928280|63430401  
0.042926861|0.019640145|0.007870758|0.007937057|98319936  
0.230206088|0.097290177|0.044641202|0.007946161|34068033  
0.056624035|0.042916251|0.004492965|0.007968022|4479981  
0.045496084|0.018339189|0.009660665|0.007987899|04680549  
0.047326345|0.026761772|0.006514514|0.007992764|86190803  
0.043560257|0.026379849|0.006161613|0.008016348|95670681  
0.028845717|0.018799783|0.002905153|0.008040453|44388725  
0.478649251|0.281093492|0.072630446|0.008071696|07650994  
0.577669310|0.482850316|0.030093324|0.008132147|6415879  
0.061346912|0.039382152|0.008013413|0.008140262|32286995  
0.038902681|0.020461584|0.005593150|0.008142880|37531251  
0.884595188|0.760191087|0.040221870|0.008155896|21260557  
0.908755495|0.813456529|0.027928763|0.008157498|6840875  
0.033895534|0.023354873|0.004156899|0.008242150|34764197  
0.503944957|0.408572217|0.030656424|0.008251253|37483995  
0.332394903|0.225535206|0.038375715|0.008253683|26407769  
0.048799594|0.036200097|0.003693694|0.008254448|32851302  
0.051646600|0.027823730|0.008057171|0.008297897|52833716  
0.057608715|0.032309532|0.007526376|0.008305484|96372762  
0.555611158|0.382318516|0.049776681|0.008323618|4517498  
0.733722932|0.560180446|0.062618685|0.008346495|31697581  
0.064530106|0.036598650|0.008743966|0.008357225|48695918  
0.132643779|0.054325954|0.024635914|0.008374236|40453083  
0.199760885|0.067992432|0.038638484|0.008400986|6235627  
0.719947930|0.543417735|0.060933453|0.008409829|85683819  
0.177206913|0.054833996|0.037113254|0.008461023|85292077  
0.026409112|0.015699210|0.003667118|0.008471546|22810933  
0.618434879|0.500178450|0.043692024|0.008473948|38441707  
0.935603357|0.911409789|0.008542266|0.008492820|62825132  
0.547467050|0.327404036|0.060343743|0.008493434|01414623  
0.179485012|0.049870477|0.036137101|0.008532992|04579539  
0.039466458|0.025920104|0.003924808|0.008561923|24298214  
0.046136064|0.022369896|0.006215027|0.008565511|98518446

0.146787807|0.071103970|0.023294117|0.00858755955467105  
0.106528647|0.051217826|0.016593015|0.00859596403699643  
0.037699040|0.021121766|0.005546776|0.00863173126980747  
0.165141197|0.100636843|0.019285265|0.00864507312924574  
0.904914052|0.719962907|0.068935751|0.00865643141317885  
0.061731655|0.030763003|0.011074171|0.0086736811825521  
0.044769807|0.027126134|0.005796041|0.00868712635456753  
0.187035935|0.098666381|0.034390976|0.00869821925771047  
0.036752680|0.022542688|0.003908084|0.00871045304652305  
0.929491451|0.885747576|0.013941473|0.00874117854851126  
0.043484625|0.018950810|0.008839641|0.00876503013753322  
0.064822298|0.029109686|0.012561115|0.00877252461353002  
0.034951575|0.019135038|0.004924728|0.00880554967321773  
0.899025328|0.852659136|0.017124380|0.00880818434089963  
0.806146839|0.627351411|0.057157152|0.00882757784994567  
0.032264120|0.019201711|0.003988875|0.00882939521213272  
0.180681687|0.079662564|0.029878395|0.00885771746653689  
0.077223579|0.046210629|0.009188387|0.00886523276007248  
0.888986424|0.693178963|0.068909756|0.00890698502829456  
0.045802550|0.020470868|0.007861650|0.00895486028115682  
0.225091789|0.123837172|0.030361379|0.00902401298564053  
0.065596934|0.024229605|0.011684422|0.0090287496248237  
0.063277447|0.031918719|0.011474267|0.009033421494817  
0.598012918|0.446928989|0.042629813|0.00904296660370833  
0.083196230|0.053736457|0.009089244|0.00904423551738708  
0.412159133|0.275030686|0.037332238|0.00904623953168382  
0.066960322|0.034831190|0.009888578|0.00904869056585919  
0.063650547|0.032758791|0.009255691|0.0090591632410982  
0.670796144|0.456164129|0.053374503|0.0090648862801481  
0.030942443|0.017572723|0.004195233|0.00907037413124955  
0.561023366|0.438317145|0.038924991|0.00907885878580859  
0.636692061|0.546386702|0.035022552|0.00909191497026047  
0.071734216|0.030884306|0.011063007|0.00911729940381979  
0.062538355|0.032913148|0.010106993|0.0091182634891224  
0.047983033|0.031288352|0.005712021|0.0091244371800793  
0.033907424|0.018705647|0.004749634|0.00915313016833712  
0.113575275|0.054038142|0.020030152|0.00916356584398572  
0.073882944|0.037667911|0.011287541|0.00917201037537096  
0.060639908|0.026187267|0.013409398|0.00917213598226311  
0.074930355|0.031525528|0.013696980|0.00919764740282904  
0.101061532|0.052761576|0.013150708|0.00920904848936451  
0.133891185|0.041907902|0.028025198|0.00923453652022695  
0.064487453|0.035977607|0.008501387|0.00923623441269899  
0.304546205|0.239261595|0.023020834|0.00929440361217539

0.078141547!0.050384783!0.008237864!0.00936561000251583  
0.506019467!0.261191988!0.075265217!0.00937060054392684  
0.658139784!0.440138731!0.075430944!0.00937480125872731  
0.559712364!0.444626108!0.040171198!0.00943792955161709  
0.093374849!0.057108706!0.012465477!0.0094865528230115  
0.082513797!0.046000156!0.010136868!0.00954817035041145  
0.091030464!0.034576868!0.016868192!0.00957663576440626  
0.596558351!0.469449026!0.040621902!0.00959778178362673  
0.730756164!0.524426793!0.058349818!0.00963242931300076  
0.978378664!0.925202686!0.020011992!0.00963706729829031  
0.890228171!0.822047402!0.024252444!0.00965412804894876  
0.055357214!0.027116599!0.010192454!0.00967131064308786  
0.090846321!0.046094956!0.014410864!0.00967719366729945  
0.041805828!0.026188573!0.004736157!0.00972360358276461  
0.603651477!0.444647435!0.052880816!0.0097324672797686  
0.370032462!0.161823393!0.068103480!0.00974901475546113  
0.368747524!0.243613058!0.038779077!0.00975545979725061  
0.370294086!0.298850664!0.022513927!0.00977710471354651  
0.246534606!0.134798282!0.041118346!0.00985854372862602  
0.077674482!0.050782114!0.009529604!0.00987409873079357  
0.056478427!0.022201482!0.010335253!0.00987484367030709  
0.036999068!0.022280084!0.005188001!0.0099300730060415  
0.393578761!0.237982757!0.044918165!0.00993317287094041  
0.346350264!0.206996573!0.042637125!0.0099636431943911  
0.292320617!0.140605782!0.045950666!0.00999311999719116  
0.468959383!0.373644590!0.032345716!0.0100341186230366  
0.610706338!0.485744498!0.037740583!0.0100453230123969  
0.281519511!0.166305598!0.033015543!0.0100605182937431  
0.801831885!0.645174314!0.053006664!0.0100645958207867  
0.056088944!0.035155587!0.005873060!0.0100719376669719  
0.062624456!0.035416500!0.007723110!0.0100851908017756  
0.055536947!0.022428887!0.010079012!0.0100906561708347  
0.026361130!0.018310856!0.002846732!0.0100920115298989  
0.042298637!0.031962452!0.003648844!0.0101135018397214  
0.927319547!0.811845664!0.035991659!0.0101324698735556  
0.051007570!0.038563135!0.003888622!0.0101359322110964  
0.679866906!0.522136014!0.052830007!0.0101519882643568  
0.086583327!0.030998217!0.014959242!0.0101826117009646  
0.109313685!0.049787874!0.016743740!0.0101906452589251  
0.028778442!0.019593163!0.003396246!0.0102031256950977  
0.401303711!0.285516153!0.037574392!0.0102798276992168  
0.385465366!0.241772953!0.045821223!0.0102926755732333  
0.862904149!0.826768916!0.014187649!0.0103001578837347  
0.055115560!0.025305107!0.009486669!0.0103139230146947



0.133530837;0.042289792;0.031546619;0.0103143221611778  
0.082064331;0.038475762;0.015468619;0.0103816129307003  
0.035725409;0.018825189;0.005132993;0.0104157449276407  
0.797920769;0.568790530;0.068506750;0.0104195983228382  
0.116116113;0.031327750;0.029980991;0.0104698281062308  
0.058314051;0.039702673;0.006175174;0.0104701924667676  
0.946402306;0.863341822;0.027274993;0.0104720847391008  
0.081061298;0.041509864;0.011430162;0.0104876203727328  
0.191243293;0.058623258;0.041919070;0.0105131824294302  
0.294215843;0.170714763;0.037552870;0.0105558443364878  
0.087033507;0.046515103;0.013691035;0.0105629677744195  
0.598995852;0.501097788;0.037290109;0.0106188574090355  
0.265696423;0.158679286;0.034556769;0.0106320188337165  
0.123183325;0.038860961;0.025790590;0.010651777286844  
0.820975182;0.622110247;0.057796965;0.0106943891488435  
0.090090146;0.049497690;0.011344155;0.0107058177701763  
0.975853136;0.912849426;0.024293416;0.0107139967535994  
0.555271337;0.335012355;0.080767095;0.0107224245010747  
0.058967576;0.025602862;0.010672208;0.0107929123883957  
0.083539825;0.054705238;0.009518770;0.0108061714219806  
0.100350938;0.032701890;0.020353795;0.0108614539594914  
0.047077423;0.026200219;0.006420175;0.0108713437938901  
0.164422783;0.118714590;0.014767037;0.0108913107589098  
0.136228579;0.087854101;0.014984875;0.0108967758545014  
0.536724828;0.320520683;0.065545087;0.0109234436067838  
0.063698302;0.036224897;0.009402417;0.0109590919913225  
0.275386859;0.090795434;0.053538616;0.0109618556139898  
0.849705349;0.705113002;0.040115137;0.0109635105802742  
0.042740329;0.024191463;0.006172290;0.0109722568372489  
0.222376426;0.158797610;0.019174687;0.0109782231812894  
0.649451880;0.509668250;0.046827659;0.0109824816313896  
0.255007874;0.152508543;0.032902766;0.0109911551476162  
0.857802420;0.714992089;0.044927535;0.0110181135274549  
0.748728839;0.519304642;0.071798355;0.01102195801289  
0.622105968;0.485435785;0.045505230;0.0110318229501526  
0.200682134;0.096855151;0.036003974;0.0110411963904553  
0.057870909;0.026704602;0.008891678;0.0110457596267907  
0.056926923;0.038562123;0.006423121;0.0110480712825528  
0.890099782;0.827456541;0.020234891;0.0110524982496344  
0.598040645;0.502177853;0.036192181;0.011058343475443  
0.065315911;0.032347698;0.010435225;0.0110629277853895  
0.594816263;0.526693265;0.026002868;0.0110672525512063  
0.117111546;0.040132426;0.026887116;0.0110742379444401  
0.435589459;0.027741037;0.153535756;0.0110815448823318

0.040674778 0.025919512 0.005669556 0.0110976284630234  
0.398245209 0.317451519 0.031079616 0.0110986765864316  
0.061004144 0.032667990 0.008741413 0.0111018463568288  
0.649768322 0.531501563 0.041066915 0.0111242835199216  
0.048575235 0.032939356 0.004727950 0.0111479166424721  
0.379671802 0.314775737 0.024598486 0.0111619392652865  
0.077668725 0.051062298 0.008767939 0.0111801191569837  
0.885382277 0.775756501 0.032346252 0.0111854908169093  
0.033666966 0.020231271 0.005268030 0.0111861816667145  
0.736163314 0.475987424 0.077910171 0.0111961284337485  
0.691776000 0.469112824 0.079024828 0.0112261742436354  
0.029959423 0.019109808 0.003531077 0.0112295676436983  
0.036064293 0.021434068 0.005627617 0.0112504581275262  
0.044602666 0.024365604 0.006001963 0.0112625393559863  
0.583491264 0.466816610 0.042520597 0.0112737305592917  
0.044983295 0.021448376 0.007148945 0.0112810149953801  
0.845318596 0.731447105 0.035796316 0.0112813043782678  
0.577716519 0.443359962 0.049132919 0.0113157577431967  
0.858229379 0.538552780 0.106929073 0.01131629789641  
0.033621255 0.020844611 0.004376924 0.0113303814446836  
0.032374361 0.017284024 0.004668951 0.0113710817403088  
0.326830232 0.249075109 0.023500180 0.0113768442269883  
0.515902839 0.398053020 0.046826343 0.0113876670373999  
0.056941238 0.027212603 0.009374123 0.0113980842015069  
0.294344408 0.162976381 0.037539080 0.0114443302639066  
0.870986405 0.781980236 0.028109225 0.01145240494447  
0.115026613 0.030291706 0.025127476 0.011462609205687  
0.195126659 0.115687617 0.027757486 0.0114755425279654  
0.342811303 0.202020004 0.040577479 0.011535667674465  
0.032383537 0.018566733 0.005086020 0.0115373840562061  
0.020307318 0.014776713 0.001888718 0.0115410872096678  
0.080498725 0.038310144 0.012799903 0.0115577731976707  
0.038436077 0.023363622 0.004876023 0.0116172625848296  
0.037683070 0.022398968 0.004979924 0.0116189762745299  
0.078149611 0.046110657 0.009540921 0.0116330132291625  
0.045483460 0.028313138 0.005311312 0.0116737035799851  
0.881769147 0.799895628 0.022917369 0.0116900338326406  
0.034052692 0.013722080 0.005483142 0.0116905689880478  
0.839032284 0.729434212 0.041088432 0.0116967364997204  
0.065881363 0.031911774 0.010172383 0.0117001233660369  
0.036570159 0.026180519 0.003969483 0.0117220708891978  
0.066398067 0.029089821 0.010508657 0.0117329337107057  
0.033671078 0.024625791 0.002847848 0.0117649448000604  
0.052537731 0.030060366 0.006346275 0.0118084819124397

0.817140678:0.631790620:0.069360724:0.0118127444651489  
0.642246917:0.503099234:0.042394288:0.0118192036300283  
0.605297514:0.435352892:0.065950913:0.0118218846013322  
0.030975450:0.017446755:0.004188510:0.0118247802159619  
0.630621432:0.511064203:0.035523176:0.0118291403838693  
0.077528160:0.048725241:0.009139939:0.0118480635898772  
0.785909360:0.649284432:0.040028058:0.0118916010931889  
0.101201096:0.054086224:0.014623122:0.0119004946900997  
0.681710851:0.578395830:0.030233617:0.011926346027672  
0.861109561:0.763456277:0.030849106:0.0119353141737797  
0.104130290:0.070485341:0.010058986:0.0119844737871682  
0.506296382:0.386099844:0.040401794:0.0119917886875261  
0.026120806:0.014624552:0.003524761:0.0119976253072952  
0.269810602:0.087326794:0.051552954:0.012022588313815  
0.053770113:0.029688891:0.007313235:0.0120623473537956  
0.766890057:0.575915990:0.066132940:0.0120845299570347  
0.287914902:0.071971699:0.070381662:0.0121255337953534  
0.054958379:0.029401335:0.009370424:0.0121358492342352  
0.049945127:0.026129761:0.006050774:0.0121481103768215  
0.792816536:0.569963510:0.066278522:0.0121731725270265  
0.089909891:0.060819360:0.009299304:0.0121851435025592  
0.064274303:0.045519492:0.006808525:0.0121981963217834  
0.727169883:0.566369540:0.055302660:0.0122039560971396  
0.904137992:0.451322091:0.161325535:0.012213165757263  
0.901006645:0.855055577:0.014277057:0.0122215637113872  
0.133806886:0.052758737:0.025203771:0.0122391814851779  
0.776394523:0.600919338:0.047085705:0.0122811641321825  
0.057501647:0.035130997:0.008139937:0.012288429230616  
0.098608450:0.034842537:0.019297416:0.0122958000069324  
0.126843354:0.035908399:0.028568300:0.0123006183793962  
0.052198373:0.027745664:0.007117579:0.0123259150017849  
0.041729269:0.022080832:0.006035803:0.0123689955866849  
0.073268427:0.034541929:0.013294877:0.0123846624741132  
0.105656853:0.043295304:0.020997611:0.0124175804206354  
0.028239765:0.014731998:0.004069899:0.0124285380882129  
0.591892830:0.411532703:0.054596799:0.0124358456389534  
0.559706778:0.042376195:0.189000528:0.0124419397617333  
0.077438040:0.038906914:0.011836354:0.0124517454511608  
0.109002402:0.033575869:0.021525256:0.0124830790848686  
0.266782673:0.185710069:0.026066829:0.0125096622325411  
0.102723074:0.066003892:0.012703515:0.0125108566650284  
0.277162811:0.122145009:0.053941018:0.0125367791540097  
0.812700985:0.696253472:0.042756718:0.0125644200797123  
0.318628675:0.164849598:0.053303216:0.0125680906880675

0.837484951!0.734341687!0.036201393!0.012575044389519  
0.043147073!0.023940382!0.005896343!0.0125922032924224  
0.577633158!0.472063659!0.040649782!0.0125925307720392  
0.638390395!0.516642934!0.048407598!0.012593142883343  
0.095970884!0.049827085!0.013733880!0.0126113602222935  
0.042949774!0.023038740!0.007076135!0.0126527513198183  
0.861163696!0.753436775!0.039721869!0.0126618656166578  
0.077648800!0.037120938!0.012176939!0.0126751717707927  
0.642725546!0.547157259!0.038152472!0.012689704542032  
0.041698167!0.018926970!0.007280001!0.0127904497058827  
0.147678613!0.075136162!0.025839050!0.0127950458741316  
0.616905528!0.496740141!0.035857111!0.012801227520402  
0.431953269!0.321057643!0.031172784!0.0128165349943791  
0.292449219!0.187899066!0.028080144!0.0128536002552634  
0.142441995!0.039823870!0.033735870!0.0128609894599651  
0.714257707!0.599084200!0.034083642!0.0129153927782218  
0.212232624!0.126391032!0.027527339!0.0129331799635819  
0.612615227!0.491507855!0.044146636!0.0129403539742148  
0.473596092!0.384916551!0.025432508!0.0129690169821104  
0.044103649!0.023664510!0.007008211!0.0129715473196529  
0.718632489!0.613947546!0.036076732!0.01297158267867  
0.186636307!0.106591918!0.023081728!0.0129794605969626  
0.126834879!0.060103079!0.019294731!0.0129887171475041  
0.058399728!0.018994982!0.011375572!0.0129904819008938  
0.945373562!0.870102922!0.021281648!0.0129946189369663  
0.065092650!0.033810047!0.009738420!0.013013814143915  
0.039957622!0.024795780!0.005717342!0.0130165613741333  
0.936732423!0.912543332!0.007889994!0.0130317918415069  
0.887257215!0.804850381!0.025407798!0.0130671330427135  
0.934281093!0.866295460!0.025653175!0.0130679993754135  
0.870392051!0.796110931!0.025106922!0.0130740462764813  
0.068822183!0.044858810!0.007576892!0.013083649265912  
0.039865528!0.026160980!0.004348366!0.0131480052787449  
0.615266929!0.485257846!0.039460372!0.0131780525092279  
0.655377571!0.481952514!0.050292086!0.0132316581640422  
0.058770546!0.037345171!0.007411179!0.0132529899770915  
0.497722588!0.396884965!0.032316740!0.0133098622018432  
0.047338818!0.024634092!0.007018915!0.0133776057087192  
0.118432559!0.062614654!0.014974504!0.0133948298693172  
0.583097739!0.419748822!0.053728876!0.0134049081698191  
0.043906108!0.025459340!0.006250519!0.0134607374933148  
0.083015955!0.049672191!0.009119658!0.0134817123878879  
0.381703525!0.287711499!0.038770965!0.0135413883337619  
0.934833092!0.875493622!0.021437050!0.013546398826381

0.090412868:0.039206387:0.017211228:0.0135467435930743  
0.378852457:0.259231842:0.049702128:0.0136068045761788  
0.042662666:0.029991473:0.004141572:0.0136107084748401  
0.555135337:0.434518006:0.041585539:0.0136274937361757  
0.059899284:0.030830570:0.008878768:0.0136477975273466  
0.385283249:0.317962426:0.022253149:0.0136620597137666  
0.486839193:0.273915563:0.063562624:0.0136820691785222  
0.053061540:0.024974710:0.008224137:0.0137370111148541  
0.162775500:0.108336120:0.018970640:0.0137828751608167  
0.069358664:0.027548457:0.012655631:0.0137946484955701  
0.041420970:0.029128581:0.004444139:0.0138111401224058  
0.064142315:0.033396875:0.008961891:0.0138746677812961  
0.188298041:0.075647489:0.034119864:0.0138937724333454  
0.897152841:0.801873803:0.027923202:0.0139178338542446  
0.077336584:0.040563625:0.012616404:0.013929304979506  
0.049666196:0.030087304:0.007021629:0.0139872061286985  
0.967449183:0.928093132:0.010946051:0.0139971125888957  
0.075951599:0.050438723:0.007914039:0.0140260082810358  
0.061416305:0.029994669:0.010752087:0.0140786394687324  
0.951883705:0.822935962:0.042387641:0.0140860471374726  
0.052473874:0.026850521:0.007527653:0.0140956978195886  
0.064930810:0.046431223:0.005974194:0.014096945907987  
0.932643931:0.802856082:0.038277977:0.0141127738297068  
0.058523160:0.031569555:0.009107757:0.014125094581279  
0.704649753:0.587521148:0.037128537:0.0141428300352917  
0.503785438:0.425460821:0.026083804:0.0141483167333825  
0.048293168:0.022657233:0.008016417:0.0141593934465501  
0.033549773:0.020613369:0.004220724:0.0141809291865593  
0.556501265:0.417610846:0.048458067:0.0141934938466915  
0.129039621:0.050254210:0.025338176:0.0142307678972818  
0.094419939:0.049914016:0.013365367:0.0142615153314823  
0.078157335:0.043882136:0.010667207:0.0142770219148602  
0.088523701:0.039899801:0.013751414:0.0142774453137203  
0.560882832:0.424245331:0.045479144:0.0143603143841563  
0.033891294:0.024098296:0.003697278:0.0143675609558583  
0.031985098:0.020123516:0.004207260:0.0144006249117848  
0.889935875:0.797944040:0.037605659:0.0144042181616274  
0.408130283:0.033438120:0.115473114:0.0144401260080885  
0.038749421:0.019817599:0.005215426:0.0144416842966274  
0.172130090:0.057610889:0.034490976:0.0144533541896119  
0.092462668:0.051630040:0.013887342:0.0144632544672928  
0.309314356:0.138777059:0.048403125:0.0145029199217631  
0.647741018:0.325518101:0.107089467:0.0145251705474976  
0.891714293:0.792328050:0.027837398:0.0145319620034342

0.037806276 0.018525596 0.006244633 0.0145333201871787  
0.046724712 0.022415347 0.006944517 0.0145388261210704  
0.654627699 0.534890708 0.040770322 0.0145485591115111  
0.819379496 0.735988725 0.026187339 0.0145496982145299  
0.873769548 0.771279099 0.035968127 0.0146465895426525  
0.028764341 0.015707178 0.003932001 0.0146539241441419  
0.878173451 0.390581141 0.168926440 0.0146647322318738  
0.094323860 0.036078569 0.019362040 0.0147155442919125  
0.116389848 0.047634111 0.023089210 0.0147371120577864  
0.877383073 0.768166626 0.034182934 0.0147643759601096  
0.171963438 0.129375207 0.014715920 0.0148047113137349  
0.633119701 0.517072090 0.034427547 0.0148686008621637  
0.062692046 0.032116898 0.009055578 0.0148700021584226  
0.604449376 0.476435352 0.036297830 0.0148975607658835  
0.845739708 0.647526678 0.051712302 0.0149123627946811  
0.538298955 0.405248734 0.042967149 0.014944118337814  
0.881367711 0.820769960 0.018036539 0.0149750142192571  
0.078045943 0.044379610 0.010811886 0.0149830621992241  
0.903019473 0.828670784 0.023649883 0.0150770642182023  
0.414081516 0.251512094 0.045495941 0.0150776083269005  
0.152123412 0.036830390 0.037992915 0.0150787586370775  
0.189013828 0.101242590 0.025261693 0.0151115520588994  
0.044011649 0.025133784 0.005805767 0.0151154804950426  
0.028067493 0.020248283 0.002220322 0.0151357348345225  
0.927669334 0.875374443 0.019067984 0.0151615918744014  
0.069954292 0.039498234 0.009410748 0.0151855456428489  
0.913430842 0.847005946 0.022276823 0.0152244677856536  
0.087417557 0.061636073 0.008450224 0.0152280831927608  
0.034979122 0.020225133 0.004748556 0.0152403589966886  
0.059047991 0.025244624 0.011091267 0.0152591285081583  
0.615249904 0.358376911 0.089122061 0.01526538406443  
0.151540236 0.048442930 0.036261534 0.0152753480314431  
0.901759399 0.859538631 0.016145895 0.015289671696643  
0.032721204 0.023170242 0.003074015 0.015313100603716  
0.034201399 0.024173284 0.003314333 0.0153788930459028  
0.900665017 0.820135415 0.026613864 0.0153802932541655  
0.091278046 0.061453297 0.009775071 0.015396048384191  
0.766698182 0.581850537 0.055337197 0.0154496254349854  
0.276522085 0.064349835 0.061986915 0.0154985321971333  
0.438434827 0.333953410 0.034845524 0.0155105889220407  
0.597513742 0.398396101 0.065759751 0.0155148080023595  
0.063268579 0.041326132 0.007034607 0.0155309159349235  
0.933746801 0.897552235 0.010708985 0.0156131079328072  
0.854558920 0.706014595 0.048499698 0.0156255371857397

0.944278291!0.863101202 0.026653671!0.0156474031520071  
0.501606627!0.392642043!0.036149576!0.015657325833747  
0.039661948!0.020860623!0.004962572!0.0156582576386549  
0.029991597!0.019691851!0.003174405!0.0156598545748711  
0.393067345!0.201463297!0.059840332!0.0156719075842699  
0.775350489!0.607231881!0.047772920!0.015733855046715  
0.462796836!0.356856432!0.032226481!0.015741813558636  
0.463139307!0.284185498!0.057162805!0.0157577805864692  
0.911766548!0.772196347!0.049362583!0.0157846529653851  
0.037572986!0.023095116!0.005324156!0.0158141887377854  
0.678884185!0.513208564!0.051486477!0.0158205991167677  
0.250540257!0.167942723!0.027740303!0.0158691666070084  
0.090601771!0.042799938!0.015826370!0.0158739107339358  
0.027236051!0.019127914!0.002847221!0.0158784819923256  
0.037868689!0.019651640!0.005392855!0.0158822351977671  
0.920169884!0.868202318!0.018726197!0.0158889151023383  
0.067360219!0.048071729!0.005316585!0.0158977727000711  
0.788706623!0.718191866!0.021276621!0.0159341413593638  
0.224682040!0.068226166!0.048069439!0.0159353809116365  
0.883882644!0.808970510!0.025422141!0.015954770350122  
0.298109905!0.186788251!0.032031975!0.0159569827992992  
0.111718307!0.053902666!0.016201353!0.0159669136380321  
0.653510113!0.511969511!0.049415394!0.0159677075134756  
0.901751456!0.844862112!0.019279537!0.0160795044293739  
0.179058642!0.066825113!0.034011418!0.0160953671710708  
0.059313026!0.024955751!0.012112168!0.0161353268475498  
0.085279497!0.047601227!0.011576569!0.0161617550487077  
0.029456481!0.017958309!0.003799650!0.0161676272184153  
0.273404613!0.204635136!0.023238667!0.0162403392949001  
0.712242847!0.589654174!0.036422205!0.0162640623045844  
0.616998484!0.430443665!0.061342050!0.0162644145775189  
0.076634536!0.047570472!0.008591337!0.0163150985182054  
0.852826070!0.762073564!0.031283027!0.0163155975915668  
0.045393853!0.021699917!0.007106022!0.0163185797994461  
0.863328524!0.753010382!0.029871364!0.0163245534081944  
0.100929450!0.046821445!0.017970654!0.0164275302277267  
0.066988077!0.038633512!0.008310208!0.0164538830600373  
0.162819909!0.070049365!0.028515862!0.0164575567519985  
0.070703937!0.045839126!0.007190885!0.0164931542437109  
0.200141037!0.099929716!0.036383373!0.0165280683675859  
0.602005764!0.499364075!0.035496387!0.0165368345404129  
0.165527819!0.044326375!0.035048317!0.0165401558062758  
0.194263119!0.116967427!0.021752159!0.0165579903632684  
0.053005898!0.023193652!0.009695283!0.0165723639613846

0.902610023!0.775833520!0.042271325!0.0165806025069886  
0.924956879!0.859865506!0.019468425!0.0166079966123164  
0.123372016!0.051780185!0.020824350!0.0166329254498305  
0.060105581!0.018551300!0.012133967!0.0166669044582211  
0.049417832!0.032700569!0.005644437!0.0167119641393648  
0.045336227!0.030357411!0.004923265!0.0167269730026977  
0.623980033!0.400492546!0.072327348!0.0167592283852675  
0.045766542!0.033323471!0.003846263!0.016804508932337  
0.057478067!0.029462820!0.008447600!0.0168112423586213  
0.048219029!0.026990430!0.007651036!0.0168315399322573  
0.065218619!0.027371602!0.011614870!0.0168428200974618  
0.193446796!0.110768510!0.030807216!0.0168492091225589  
0.890792877!0.756335532!0.045667996!0.0169010715042102  
0.022266288!0.009894054!0.003428320!0.0169792878699405  
0.433633823!0.297298357!0.047328525!0.0169916732932521  
0.091627421!0.055529904!0.012933361!0.0170327448111731  
0.355542730!0.250474666!0.033131412!0.0170328851592054  
0.141479419!0.056812354!0.025362025!0.0170378810340645  
0.045424338!0.025109584!0.007124036!0.0170625553876888  
0.074619422!0.035498900!0.012937779!0.0170769663553516  
0.043975429!0.028432825!0.005463920!0.0170785109713521  
0.234351474!0.111386875!0.049524715!0.0171138321230984  
0.921450768!0.877531175!0.013659587!0.0171457722451265  
0.155508462!0.043418459!0.035708293!0.0172035249881696  
0.051326539!0.024763804!0.007474357!0.0172041602284123  
0.128135342!0.066270012!0.017687843!0.0172132019468246  
0.070281371!0.032510414!0.014962235!0.0172431305627162  
0.671128430!0.460597518!0.076259022!0.0172435161079628  
0.115964292!0.033015463!0.026039387!0.0172558726279873  
0.064121430!0.037372726!0.007969363!0.0172629694408135  
0.086317392!0.045120226!0.011525197!0.0172662998138155  
0.051778554!0.020822705!0.009125345!0.0172755176349298  
0.469228831!0.301525596!0.057353254!0.017287531430011  
0.946887526!0.909239266!0.012954818!0.017290717193531  
0.533285384!0.335077280!0.069031556!0.017316106648626  
0.319452777!0.184578273!0.043264767!0.0173209257372065  
0.679344499!0.411453152!0.089641772!0.0173453303436508  
0.230920755!0.153409751!0.025287612!0.0173675084974973  
0.906260477!0.844755804!0.017190489!0.0173773371748529  
0.169255658!0.038857315!0.037724152!0.0173786553550802  
0.112807820!0.083044919!0.010417998!0.0173849017473668  
0.689537106!0.620489242!0.025081169!0.0174078270602434  
0.215116715!0.043559566!0.056374136!0.0174536550048945  
0.030217526!0.020627079!0.003364570!0.0174566631128767



0.593191568:0.526549812:0.020593103:0.0174634061163213  
0.042674706:0.020397729:0.007406155:0.0174760306463017  
0.044296835:0.023353646:0.007921370:0.01749664199873  
0.055063892:0.023381611:0.008905151:0.0175129544394268  
0.098317468:0.064395005:0.010752201:0.017529188515731  
0.072457760:0.033512662:0.013470565:0.0175534476111795  
0.025416938:0.014987574:0.003193015:0.0175543875552053  
0.790136515:0.705675072:0.028265607:0.0175826749699646  
0.055634256:0.027673807:0.009030871:0.0176014848118168  
0.034032288:0.021423669:0.004526548:0.0176325055299367  
0.295634214:0.159715571:0.051576668:0.0176330557600655  
0.942137205:0.833737937:0.035592541:0.0176397561594563  
0.189596167:0.039858148:0.044301960:0.0176518087438882  
0.051298990:0.028284007:0.007268022:0.0177041570264211  
0.889165871:0.759587815:0.045970215:0.0177897396386503  
0.682406096:0.605083832:0.029530189:0.0177978013556044  
0.065926104:0.035115278:0.010587620:0.0178086041617898  
0.046778789:0.024238341:0.007105389:0.0178093172482624  
0.077347632:0.040329123:0.011954917:0.0178862604417203  
0.590542744:0.472739813:0.044567509:0.0179058421552474  
0.274147616:0.104250349:0.059804483:0.017920714779506  
0.236360868:0.066959318:0.056549529:0.0179410266949  
0.107926760:0.030264131:0.025367350:0.0180002003330232  
0.852393867:0.617824690:0.073684404:0.018010622169506  
0.141617788:0.040055989:0.032336391:0.0180260734862198  
0.051084811:0.032146599:0.006931684:0.0180508093997591  
0.934180544:0.880552942:0.017342934:0.0180543223015553  
0.047993285:0.026451089:0.006978265:0.0180902797681355  
0.035885078:0.024768970:0.003679362:0.0181250396230996  
0.079839765:0.032597432:0.015276357:0.0181306012013818  
0.024623610:0.012170567:0.003569975:0.0181386904213569  
0.961164780:0.934530519:0.007871753:0.0181901018335691  
0.845351649:0.609045528:0.077849484:0.0182056692709797  
0.072904727:0.029876932:0.013631239:0.0182357722873271  
0.095478845:0.048481167:0.014502425:0.0182866536359791  
0.038412278:0.019382169:0.006406905:0.0182903208138258  
0.067865191:0.037504421:0.008872301:0.0183117296038247  
0.287481453:0.166932822:0.038352184:0.0184018088717534  
0.034374722:0.019308813:0.004853321:0.0184028160527863  
0.024309165:0.013638686:0.002750397:0.0184046003618536  
0.663136540:0.488375368:0.062343224:0.018405675611449  
0.079837378:0.035895186:0.013601694:0.0184183431740862  
0.219185374:0.149942239:0.021853442:0.0184294677605037  
0.048036164:0.028014984:0.006062551:0.0184330340138221

0.056748354!0.026373795!0.008883673!0.0184830471081177  
0.365873725!0.208023412!0.054339409!0.0184978103201081  
0.257936528!0.136481439!0.032824038!0.0185134803884548  
0.167082052!0.068793013!0.031345806!0.0185267553815361  
0.156156759!0.036577863!0.036600123!0.0185464618411662  
0.108308978!0.065262230!0.013583018!0.0185546852402677  
0.026748303!0.014640122!0.003458441!0.0186052563394888  
0.334190720!0.026671713!0.095532575!0.0186079551082607  
0.618125751!0.379625535!0.074323512!0.0186254121378312  
0.939755775!0.893084185!0.014251084!0.0186465133167657  
0.065706424!0.036930975!0.008010376!0.0186497189910696  
0.219360308!0.050394915!0.062538242!0.0186506622429712  
0.865770649!0.726573949!0.045644853!0.0186628031382139  
0.523632584!0.377209970!0.047802357!0.0186658842428484  
0.520802554!0.442826385!0.029089598!0.0187088372416391  
0.904431827!0.838552586!0.019716868!0.0187130261224002  
0.041069724!0.019225630!0.007009369!0.0187474143578305  
0.256730255!0.127421861!0.039084467!0.0187616755835191  
0.064816039!0.037647477!0.007646274!0.0187946783400624  
0.334280909!0.225365950!0.035155402!0.0188277637112496  
0.030645523!0.022482480!0.002739167!0.0188337408451209  
0.737709683!0.628895563!0.034812126!0.0188751531220698  
0.067150103!0.036067905!0.008698572!0.018945581580445  
0.162081230!0.043300258!0.036055258!0.0189631987847183  
0.090163981!0.034814567!0.018850621!0.0189808327611648  
0.294794923!0.178413007!0.038028859!0.0190319351380265  
0.061223699!0.033492273!0.008465187!0.019036445960507  
0.057601940!0.023953977!0.009694506!0.01904043934841  
0.068400326!0.035764367!0.009981954!0.0190841263551371  
0.959858908!0.735151027!0.065613878!0.0191130334536164  
0.045919338!0.020299774!0.007077525!0.0191159372888811  
0.077214033!0.042728148!0.010424114!0.0191176439732258  
0.310944185!0.215113175!0.030064693!0.0191355944574729  
0.217222039!0.105697503!0.043815163!0.0191406469764807  
0.055630371!0.026628856!0.011055965!0.0191510402439741  
0.044809181!0.023310137!0.006421746!0.0191543171250895  
0.225603016!0.119114452!0.038910348!0.019178034953461  
0.327382443!0.217255257!0.031449713!0.0191970654702102  
0.043621845!0.019935517!0.007517097!0.0192248526731047  
0.933937031!0.830640392!0.031982504!0.0192304573084408  
0.602916269!0.417885020!0.054543639!0.0192503003913688  
0.929357396!0.763372459!0.050456218!0.0192514051671632  
0.029574340!0.015832783!0.004993791!0.0192629785641115  
0.368353629!0.212484255!0.048241555!0.0192727748979549

0.028716705!0.014875867!0.004445601!0.01930018001945  
0.034676876!0.016459626!0.005555883!0.0193212825534146  
0.127547119!0.049696734!0.022864412!0.0193598218629756  
0.050198312!0.026844159!0.007140354!0.0193670243296601  
0.088554974!0.052004068!0.009715031!0.0193880507377385  
0.032426385!0.019134358!0.003562811!0.0194018839528257  
0.910258369!0.800433307!0.042241530!0.0194087112462135  
0.068858981!0.039833572!0.008341209!0.0194118880425691  
0.028623747!0.018089603!0.003720807!0.0194287664966954  
0.662212556!0.598618818!0.020807384!0.0194535080900368  
0.568749990!0.382027391!0.055875779!0.0194641921132821  
0.851933339!0.727292734!0.041583999!0.0194689582091724  
0.652589173!0.555208750!0.035563384!0.0195928559009242  
0.552008034!0.417519696!0.044227923!0.0196329097707488  
0.048443525!0.023056679!0.007370186!0.0196687727221828  
0.031862754!0.017502934!0.003756798!0.0196793710596799  
0.919907103!0.811946421!0.031105898!0.0197361141044458  
0.031491253!0.024621140!0.002031724!0.0197376047584795  
0.037289171!0.021549542!0.005277945!0.0197415615664726  
0.038549070!0.024513568!0.004863132!0.0197510957213361  
0.092275726!0.061318294!0.009608997!0.0197764945010874  
0.828594734!0.632065154!0.056730602!0.019793634160922  
0.045792992!0.026698351!0.006230980!0.019816752539884  
0.081923540!0.028748425!0.018875702!0.0198252893933087  
0.055371997!0.025704116!0.008217276!0.0198349512828378  
0.572515032!0.400321270!0.057863825!0.0198483117307047  
0.094764274!0.069179227!0.008217328!0.0198643503321247  
0.929840327!0.828686096!0.030483749!0.019930102299894  
0.140594893!0.038614035!0.029754198!0.019979287244229  
0.916928897!0.835465192!0.027874019!0.019980204848161  
0.084124197!0.051452941!0.010195929!0.0199856452539193  
0.046784564!0.025951142!0.007827857!0.0200066202989552  
0.038165381!0.021636511!0.004859743!0.0200395836514961  
0.235100439!0.106890042!0.039934257!0.0200419957008359  
0.481065417!0.415042248!0.023838117!0.0200886922868783  
0.081509221!0.036422942!0.013261132!0.0201636056614196  
0.280567405!0.162944744!0.037925118!0.0201647730428493  
0.398375366!0.212655778!0.067436000!0.0201988524335274  
0.052835054!0.028052204!0.006673114!0.0202070954917292  
0.436505960!0.342853892!0.028753006!0.0202167180770222  
0.197909454!0.111843089!0.025998020!0.0202555704192492  
0.080159800!0.041777126!0.010725740!0.0202598500578568  
0.807315893!0.692498584!0.045053084!0.0202908855337593  
0.910274929!0.866303104!0.016208953!0.0203461432325641

0.576841223:0.234283163:0.107072676:0.0203466988238976  
0.572052508:0.443888944:0.040469703:0.020347649835562  
0.069023224:0.040292655:0.009886486:0.0203539520085513  
0.140312114:0.062849099:0.022375387:0.0203636774975198  
0.285242240:0.206949345:0.029552333:0.02037239971529  
0.972798719:0.950743281:0.006949552:0.0204267967220429  
0.907544449:0.710473900:0.066803051:0.0204300875155645  
0.734679387:0.566336096:0.056838335:0.0204372213653452  
0.145226054:0.050582676:0.030512910:0.0205127452643226  
0.086936119:0.048315355:0.011452719:0.0205131703414813  
0.167661753:0.107992368:0.019710858:0.0205343619910105  
0.047164340:0.026284219:0.007860750:0.0205438995775583  
0.081149441:0.035780029:0.014593501:0.0205540963056721  
0.173464591:0.116592276:0.018503535:0.0205781200419207  
0.049421558:0.024466447:0.007681728:0.0205898406973485  
0.102369311:0.044892619:0.016913290:0.0205963139308257  
0.038973790:0.019495587:0.006848888:0.0206107662547134  
0.152959751:0.083650320:0.021255708:0.0206462813025285  
0.241517936:0.044068104:0.061301027:0.020649277470168  
0.642352647:0.401710210:0.069949367:0.0206597234172772  
0.068882526:0.035284846:0.010319808:0.0206776279089226  
0.436755128:0.339975685:0.026286932:0.0207072479665658  
0.041937101:0.022706709:0.006361353:0.020722446100184  
0.087982530:0.056417866:0.010343495:0.0207405087718742  
0.749334067:0.589835487:0.056665175:0.0207489458851122  
0.146265162:0.085000736:0.020580057:0.0207593496442144  
0.759256347:0.565236952:0.062093513:0.020807055538979  
0.750550460:0.601969317:0.051329732:0.0209594575657255  
0.812227092:0.699827757:0.044212213:0.0210740494282119  
0.070324786:0.033023816:0.012496333:0.0211064664105535  
0.097625612:0.040637936:0.020523342:0.021107380273932  
0.060443907:0.036437434:0.007964689:0.021112367174516  
0.030278326:0.018578256:0.003216240:0.0212304500369141  
0.094946335:0.047351286:0.014906246:0.0212513265108336  
0.029810912:0.018243843:0.003629695:0.0212523561223342  
0.108395713:0.047932641:0.017503436:0.0212582190604331  
0.080101154:0.041147308:0.012577654:0.0212989024690266  
0.040887822:0.022930363:0.005266027:0.0212999097133083  
0.087550195:0.053788948:0.011828959:0.0213056271037075  
0.039659962:0.020584097:0.005234137:0.0213608011960965  
0.115350134:0.036124909:0.024962561:0.0213736703489097  
0.129766281:0.055777144:0.022779076:0.0213919700399425  
0.039677664:0.020186305:0.005444447:0.0214045990047118  
0.931211610:0.878893002:0.016081427:0.0214209737236636

0.067744666;0.049790743;0.005131980;0.0214504319131176  
0.615472777;0.526901897;0.027541353;0.0214699957903696  
0.072164102;0.043824993;0.008484396;0.021478326099803  
0.084650566;0.043716317;0.013133659;0.0214805148829942  
0.672076399;0.575358274;0.029952075;0.0215466545431954  
0.246614329;0.067779494;0.053989500;0.0215598474208037  
0.752951042;0.659931937;0.034976191;0.021606317804244  
0.083306230;0.022965140;0.017526202;0.0216652491420836  
0.393252084;0.303496704;0.025299011;0.0216730335961471  
0.069692161;0.035627495;0.009145304;0.0216748943614515  
0.208731602;0.138771144;0.022588530;0.0217078048405256  
0.122936141;0.057587577;0.019697050;0.021724602887619  
0.519319624;0.381771424;0.042814734;0.0217844104128742  
0.917379155;0.837943804;0.023929398;0.0217925034278365  
0.048484108;0.034709716;0.004714254;0.0218003039564082  
0.189257482;0.045570530;0.039780841;0.0219264063292433  
0.118497231;0.082234648;0.013795305;0.021943583189404  
0.926835598;0.872620472;0.016798094;0.0219436954336862  
0.468158593;0.363579620;0.034594283;0.0219622310172265  
0.037626249;0.017493487;0.006615056;0.0220051303265305  
0.325360424;0.098308838;0.067830319;0.0220074398680968  
0.083472903;0.047212498;0.011765112;0.0220628591261218  
0.049551276;0.022882210;0.009076149;0.0221016233103918  
0.071582331;0.039172989;0.009233897;0.0221542536921559  
0.091648508;0.064246094;0.008175278;0.0221692272541724  
0.198341834;0.028754988;0.051409314;0.0222227582865891  
0.084860841;0.041721543;0.012760599;0.0222623463119753  
0.597781005;0.442548371;0.046452408;0.0222673376669344  
0.083694017;0.034978576;0.018087982;0.0222723721310591  
0.054948774;0.029354932;0.008015911;0.0222848986627869  
0.272252245;0.135443170;0.043777613;0.0222864053735494  
0.075295289;0.040916608;0.010481364;0.0223060597482635  
0.641921000;0.540650159;0.029956531;0.0223504021623599  
0.047322491;0.025481741;0.007701757;0.0223609456742544  
0.051244990;0.029667867;0.006460820;0.0223891569357358  
0.808842161;0.535554458;0.089631191;0.0224029205588696  
0.498151873;0.400401041;0.035513276;0.02241111389106  
0.045704140;0.024261288;0.006483813;0.0224381249985383  
0.042299390;0.025332674;0.006279312;0.0224653499514859  
0.909332269;0.666064212;0.067395393;0.0225024059682912  
0.095932847;0.051460975;0.013508822;0.022521465976724  
0.098332869;0.031552678;0.018430010;0.0225443703713969  
0.183015013;0.050297025;0.038697267;0.0225557616249685  
0.057134775;0.023738432;0.009155395;0.0226062019867361

0.058773118 0.031759488 0.007492411 0.0226730239324073  
0.653999079 0.423107659 0.079722285 0.02268373616423  
0.031940697 0.020441472 0.004107670 0.0227160259642141  
0.060261143 0.032855544 0.007667733 0.0227634501499984  
0.224149879 0.155845264 0.022425610 0.0227790084683036  
0.161111513 0.015739912 0.043929573 0.0227811198890778  
0.304187075 0.173519897 0.038500139 0.0227943217772808  
0.030185992 0.017614392 0.003542465 0.0228263464810172  
0.905588206 0.703792223 0.067286438 0.0228281908308987  
0.041376480 0.022153780 0.005960901 0.0229278676694015  
0.271774155 0.175027169 0.034915052 0.0229485493858093  
0.033165951 0.018660872 0.004157590 0.0229551740693952  
0.051112977 0.018675697 0.009515564 0.0229601297284006  
0.062720149 0.040220439 0.007716061 0.0229667070075937  
0.289266414 0.084101250 0.080694041 0.0229803660153069  
0.043745610 0.021116208 0.007223750 0.0230466495367227  
0.914085254 0.850824995 0.021981007 0.0230630190259586  
0.339488338 0.068704549 0.076549277 0.0230913315491318  
0.224835256 0.096560018 0.033444204 0.0231020921746631  
0.964001858 0.918664429 0.012289135 0.023155922448092  
0.037899729 0.021204211 0.005896442 0.0231840354688223  
0.226621615 0.063530639 0.051068868 0.0232163748502045  
0.069412924 0.041960605 0.009464902 0.023247531001848  
0.071373153 0.048458634 0.006507464 0.0232648129831277  
0.088870161 0.030824654 0.016252874 0.0232778227674924  
0.052062301 0.028593972 0.006840169 0.0232940625309216  
0.055610221 0.031721296 0.007458964 0.023299676391563  
0.379014683 0.243885003 0.041331937 0.0233901109191998  
0.678000048 0.579604554 0.035634094 0.0234157156108586  
0.031607110 0.020118308 0.003600895 0.0234422606968295  
0.141697970 0.062847292 0.029804474 0.0234500405591922  
0.058174645 0.030066075 0.009242647 0.0234728582328781  
0.958531220 0.872095450 0.029592162 0.0235018358080887  
0.070570605 0.039938331 0.010010538 0.0235273712349329  
0.060007601 0.035598168 0.006917290 0.0235536464761444  
0.103446081 0.033310898 0.018972415 0.0235716014207425  
0.220446849 0.123688818 0.025972023 0.0236631632731551  
0.822419116 0.720148921 0.036516081 0.0236661264037515  
0.875332233 0.761919821 0.033895189 0.0237052213851015  
0.160682798 0.059079635 0.034016896 0.0237099643303683  
0.840398772 0.626654152 0.064564068 0.0237110845758604  
0.414451869 0.297647254 0.036061948 0.0237193989803057  
0.065458760 0.046077327 0.005739097 0.023719917709485  
0.225210413 0.087186376 0.048960246 0.0237314816162468

0.132457109;0.034277610;0.028024059;0.0237554900212291  
0.079990552;0.039607539;0.012857612;0.0237859738261489  
0.094003405;0.051042097;0.013836410;0.0238138252128177  
0.349867572;0.273037267;0.027386738;0.0238957030673844  
0.061373682;0.032331065;0.008698417;0.0239052450562804  
0.032658306;0.018167929;0.004250649;0.0239060153051376  
0.596169374;0.474903596;0.045428532;0.0240083123956663  
0.873355763;0.717887395;0.043148561;0.0240501891326704  
0.105950925;0.045013212;0.018192327;0.0240628372922371  
0.145660456;0.042903311;0.032807292;0.0241531588568506  
0.905362985;0.799155758;0.027930934;0.0241598883783852  
0.066520708;0.029892020;0.011674665;0.0241764809837784  
0.071664239;0.037554090;0.010867081;0.0242324619922844  
0.088235441;0.056050932;0.010141833;0.024238710644857  
0.795254868;0.531371307;0.082490088;0.0242488716734136  
0.233130075;0.065960328;0.044055235;0.0242494550256661  
0.644610426;0.494635106;0.040142075;0.0242756315241321  
0.267542183;0.097528299;0.050083924;0.0243595176850158  
0.147259268;0.092836086;0.020498507;0.0244165040751384  
0.604191461;0.304357447;0.095735085;0.0244445144633443  
0.047479175;0.024349541;0.008210137;0.0244550861281557  
0.084804294;0.052964001;0.009474241;0.0245133581683542  
0.760976937;0.603137021;0.050017513;0.0246070946660192  
0.915225140;0.872659778;0.014856681;0.0246169245226548  
0.782290633;0.676390798;0.038948971;0.0246633368285593  
0.172291254;0.099872883;0.022749108;0.0246664175915794  
0.572105683;0.420143331;0.051969080;0.0246695562156559  
0.579552100;0.349550702;0.070593750;0.0246805468842675  
0.050899019;0.021349602;0.008429742;0.0247077987201352  
0.670878500;0.448788292;0.063106654;0.0247215031297704  
0.043584246;0.024445799;0.006510227;0.0248292233224738  
0.141190380;0.062409072;0.024362700;0.0248358902463987  
0.067214713;0.040363909;0.007752781;0.0248809997399016  
0.062269645;0.034820959;0.009489544;0.0248873467293712  
0.095693177;0.059026525;0.010749038;0.0249299075918746  
0.249237379;0.174297918;0.028890712;0.0249448590374974  
0.055237608;0.028584464;0.007915116;0.0249471063934398  
0.075736099;0.045532851;0.009613066;0.0249505999964187  
0.680165438;0.578421287;0.034517836;0.024958806881042  
0.366781849;0.188359880;0.057785666;0.0249618627323756  
0.060839961;0.030183698;0.010349265;0.0249992594532006  
0.424915352;0.293003225;0.040579395;0.0250552020484065  
0.054748981;0.022848030;0.008607211;0.0250553819366593  
0.053146045;0.023934368;0.007594462;0.0250594620917861

0.048852265 0.025315261 0.007044982 0.0250805407428363  
0.108883398 0.032541829 0.023577303 0.025096860816334  
0.641811838 0.490627991 0.042438367 0.0251185641687526  
0.872659647 0.828968015 0.014065951 0.0251389586934203  
0.551838368 0.389516740 0.052529789 0.0251596109238522  
0.079227551 0.020274041 0.018506052 0.0251662704229684  
0.059821413 0.040220549 0.005995372 0.0251692529929303  
0.661724599 0.503557511 0.054253634 0.0252500561972246  
0.099624510 0.044282433 0.018192612 0.0252659216616001  
0.253654572 0.082009089 0.053046925 0.0252741285844369  
0.602384711 0.420649785 0.065149078 0.0253064509146545  
0.144308822 0.059244295 0.025172553 0.025403125904113  
0.114789373 0.070044440 0.014754470 0.0254624775932606  
0.069712010 0.033836045 0.010069720 0.0255098018300053  
0.146709531 0.066220842 0.023936579 0.0256232034633737  
0.046244300 0.026892292 0.005335912 0.0256329188345413  
0.334845672 0.233836949 0.032956426 0.0256642952123516  
0.435771038 0.246577386 0.059889657 0.0256690035079852  
0.190261716 0.125293695 0.025021827 0.0257385872598453  
0.042983092 0.018078940 0.007234524 0.0258738991730055  
0.084061540 0.046009320 0.011332973 0.025883360859801  
0.936674395 0.828815413 0.034029986 0.0259426280901095  
0.049825110 0.026476682 0.007111358 0.0259473539787406  
0.931050383 0.865506056 0.021193093 0.0259660565821265  
0.208257543 0.139094280 0.018743955 0.0259780108258298  
0.933133489 0.864050182 0.020661434 0.0259828651349175  
0.144225429 0.036301705 0.029595858 0.0259885834809514  
0.678975996 0.543305906 0.039067235 0.0260237454597098  
0.047289515 0.016356390 0.009084003 0.0260352028298974  
0.033600785 0.017946257 0.005772933 0.0260402420240661  
0.846977388 0.714397512 0.049392063 0.0260806741697822  
0.910095378 0.826938795 0.032791582 0.0261537464308866  
0.054672121 0.032522841 0.007712863 0.0261581432305053  
0.908531628 0.872217268 0.012864593 0.0261836536912497  
0.057879704 0.037969032 0.006785854 0.0262006196592861  
0.069595448 0.024314429 0.012325449 0.0262318909262019  
0.045974606 0.023992781 0.006540757 0.0263005111610317  
0.037671787 0.018612305 0.006015477 0.0263160558294526  
0.073283087 0.029333174 0.014589237 0.0263236054373952  
0.070747386 0.036571809 0.009720261 0.0263430789705593  
0.068552828 0.037960624 0.009832045 0.026380311890739  
0.608358567 0.479787824 0.042750222 0.026396426201033  
0.876725144 0.793000575 0.035747863 0.0264503392257902  
0.819538056 0.728301271 0.032521780 0.0265579711712736



0.322698834|0.192534803|0.042217151|0.0266081241253712  
0.222548299|0.058869948|0.049037414|0.0266465520479392  
0.184023496|0.076109827|0.031860443|0.0266541951050365  
0.848808650|0.659615375|0.063513687|0.0266795993093905  
0.840901397|0.751742432|0.031272507|0.0266842871121545  
0.383259554|0.180988991|0.061017123|0.0266944338870939  
0.187633459|0.053169593|0.036605167|0.0267851938860927  
0.691592540|0.598083499|0.029806545|0.0268097514476637  
0.645059931|0.460833800|0.061634839|0.026847253629015  
0.308558444|0.202846352|0.036101047|0.0269195750653631  
0.530997918|0.277726618|0.085127866|0.0270507982361238  
0.113304920|0.037335346|0.021565601|0.0270915735031159  
0.974618948|0.943384640|0.009089930|0.0271000753196522  
0.345397025|0.266037845|0.029028004|0.0271092992852302  
0.043050791|0.024055207|0.006070443|0.0271160176986566  
0.700654854|0.464458117|0.063916335|0.0271577574502937  
0.183667720|0.030725603|0.044654776|0.0271946067270135  
0.054283473|0.033929253|0.006823024|0.0272378206465397  
0.159700305|0.053293398|0.037033686|0.0272538300540407  
0.793887908|0.590907424|0.065912930|0.0272732589138  
0.928834903|0.744395192|0.056176152|0.0273155763641395  
0.117188536|0.068462690|0.015864126|0.0273438406380795  
0.043813167|0.030230597|0.004900014|0.0273501233861733  
0.078676634|0.047840258|0.009532490|0.0274006408267307  
0.219997946|0.128057400|0.033738146|0.0274580831525768  
0.790829333|0.590623588|0.055914163|0.027494900473348  
0.306996500|0.176605601|0.037050362|0.0275073175413154  
0.680156205|0.570489440|0.037762642|0.0275405326588198  
0.180900255|0.070279565|0.038533997|0.0275657710713657  
0.067722153|0.045360491|0.006447832|0.0275688377411303  
0.065790298|0.031671014|0.009965508|0.0275852093002778  
0.325508085|0.252342186|0.021623432|0.027592591067299  
0.907243371|0.784408524|0.041197282|0.0276016865650595  
0.146049485|0.101740587|0.013941722|0.0276385963746257  
0.780627708|0.635368510|0.049334637|0.0276413404215691  
0.033002751|0.018229861|0.004586208|0.0276821059157054  
0.101890950|0.068012129|0.011757790|0.027706946157545  
0.077002096|0.052658741|0.008898119|0.0277268833559013  
0.633947487|0.536546343|0.032568883|0.0278003840210977  
0.038979288|0.021283085|0.005257931|0.0278135840760132  
0.139002928|0.041294231|0.032160588|0.0278316153599249  
0.250880551|0.089856035|0.054420801|0.0278370261221242  
0.716113616|0.647043113|0.027535701|0.0278827570558474  
0.116065500|0.066455057|0.014726571|0.0278828459867182

0.754919875:0.624173956:0.044235608:0.0279038774370337  
0.634041315:0.429765110:0.084122907:0.0279278746723432  
0.871932624:0.686647401:0.064169042:0.0279521271360062  
0.058770012:0.034902879:0.007942189:0.0279667555535214  
0.053126446:0.029552098:0.007156421:0.027967731183522  
0.836749669:0.646601984:0.062717539:0.0279687318231935  
0.296925507:0.125314608:0.055001891:0.0280114275474113  
0.460392583:0.283036701:0.051313077:0.0280123269280203  
0.244349197:0.095579688:0.049400769:0.0280674754895327  
0.089926071:0.043737300:0.014505865:0.0280826690735083  
0.050590297:0.028443672:0.007329363:0.0280955380573825  
0.038659831:0.022980611:0.004822702:0.0280991196644428  
0.124783231:0.070996533:0.020503132:0.0281072555297951  
0.045670340:0.022978356:0.007033281:0.0281188691818509  
0.193756165:0.108260015:0.025725742:0.0281353417579964  
0.270374450:0.054595833:0.061509394:0.0281415612887181  
0.045364238:0.024099644:0.007268241:0.02820756463859  
0.062770978:0.022773805:0.012412127:0.0282148871417114  
0.878004430:0.812914694:0.019219617:0.0282394089465142  
0.927093231:0.877824735:0.014694808:0.0282445804667189  
0.095872227:0.056381726:0.014857023:0.0282608617222549  
0.339770499:0.162782256:0.052281392:0.0283181698331215  
0.056910800:0.026867644:0.010206437:0.0283364626729311  
0.082770497:0.030060771:0.015674031:0.0284778819404799  
0.089711770:0.054144080:0.010760466:0.0285192915704629  
0.148989476:0.045257807:0.029677323:0.0285822759561813  
0.031229238:0.018649130:0.003697492:0.0287065455298823  
0.103061670:0.053072926:0.015428496:0.0287344256882171  
0.053996116:0.027196406:0.007499019:0.0287822052708811  
0.043801413:0.022231235:0.005663365:0.0288389392049734  
0.783597001:0.655616852:0.038567156:0.0288454814339084  
0.058086581:0.035511593:0.007142696:0.028965792938431  
0.040934002:0.030895933:0.003391333:0.0289905329953721  
0.155448940:0.073843271:0.025822123:0.0290035674222525  
0.029084390:0.018288883:0.003351630:0.0290048310449249  
0.040175458:0.028575234:0.004166671:0.0290245902653814  
0.150726300:0.100318838:0.016296693:0.0290830221295296  
0.361295444:0.270199230:0.034353656:0.0291410425175539  
0.073905168:0.027364463:0.012141688:0.0291728472900066  
0.156253294:0.077903290:0.022412446:0.0291728933406473  
0.062548537:0.030652103:0.010518971:0.0292035862598421  
0.902833352:0.816490654:0.025525684:0.0293059253896136  
0.077805065:0.040957699:0.010603538:0.0293135497957495  
0.475339980:0.061218654:0.124665522:0.0293254101344079

0.910226171:0.808744288:0.038412378:0.0293739211177577  
0.871207339:0.798819358:0.023083745:0.0293755342731696  
0.892264428:0.770302459:0.040208815:0.0293818760500654  
0.097549674:0.057521055:0.013750041:0.0294123337956057  
0.065355071:0.030291927:0.011421322:0.0294362216849351  
0.422447679:0.344124641:0.028509816:0.0294501235228506  
0.794690296:0.663959571:0.037986953:0.0294826102131253  
0.102289726:0.058773377:0.011873978:0.0294943809786658  
0.046723398:0.020109375:0.008650087:0.0295861624730535  
0.856637212:0.721559722:0.044927541:0.0295939532635465  
0.687766455:0.555845235:0.051952152:0.0296204982653498  
0.060303878:0.030331786:0.009524155:0.0296335687808198  
0.187689659:0.043429473:0.055921950:0.0296820207780706  
0.080180086:0.052103054:0.009229955:0.0296944123770175  
0.896657353:0.772339324:0.037454449:0.0296961336015509  
0.033410233:0.020549588:0.004672923:0.0297018204488313  
0.118011258:0.055207696:0.017504187:0.0297337611717554  
0.914449235:0.827604774:0.024646321:0.0297355164886444  
0.117637460:0.045725254:0.021362407:0.0297570567513781  
0.849325354:0.776725431:0.022488997:0.0298464242501323  
0.046171296:0.024470790:0.007011076:0.0298836323240802  
0.108900375:0.048922942:0.020552166:0.029885737419159  
0.277860956:0.072935979:0.066063833:0.0298936372683832  
0.057924075:0.031044689:0.008730872:0.0298986358902837  
0.030189715:0.020440845:0.003337435:0.029911135307631  
0.903973641:0.848495750:0.017202130:0.030001719301012  
0.889129250:0.743263164:0.044797576:0.0300215194764539  
0.526444666:0.407192324:0.041002700:0.0301027548216017  
0.139518019:0.066655763:0.021296997:0.0301656845976562  
0.068182731:0.041475916:0.007971704:0.0301722320156723  
0.236732229:0.113602032:0.037189587:0.0302080296629943  
0.037267334:0.021278301:0.004464811:0.030251648991772  
0.667195706:0.451808485:0.065895246:0.0302918149635874  
0.134848994:0.077247666:0.015662352:0.0303435932144545  
0.834885192:0.536098682:0.082959870:0.0303508156175993  
0.508507080:0.275386558:0.080488502:0.0303667455783365  
0.074810194:0.029082329:0.015219399:0.0303933901120575  
0.099050051:0.041061726:0.019553890:0.0304014726431437  
0.280003326:0.175842923:0.037032107:0.0304112713828593  
0.748991257:0.519918309:0.079487987:0.0304126062174018  
0.050512430:0.018405836:0.008965380:0.0304145966636317  
0.057928950:0.034636576:0.006445833:0.0304269795470584  
0.063453366:0.033294819:0.007549710:0.0304430332299824  
0.043567651:0.027330356:0.004985892:0.0304640780687239

0.037863428:0.022965320:0.004822184:0.0304889808713128  
0.049700271:0.035288905:0.005527656:0.0305033333898914  
0.027500172:0.016739094:0.003004944:0.0305312120077129  
0.303226942:0.067738515:0.066156407:0.0305700953265343  
0.903850593:0.716275858:0.058594200:0.0306211101416124  
0.055265186:0.030346120:0.008914170:0.0306388296562019  
0.646439086:0.495190747:0.049414999:0.0306443768478588  
0.136414821:0.066621928:0.018505317:0.0306517946455678  
0.091212130:0.072396121:0.007593405:0.0307052502273187  
0.553824309:0.434765023:0.040981749:0.0307286480131575  
0.660351320:0.543250342:0.037470836:0.0308082680812982  
0.928168531:0.815156098:0.038992695:0.0308119782101639  
0.382265953:0.237684391:0.044650147:0.030862884630402  
0.650768003:0.404371411:0.066741589:0.0308735633068709  
0.706129754:0.577866459:0.038966388:0.0309143028575335  
0.037079381:0.020135719:0.005123959:0.0309405801133405  
0.040896654:0.026146196:0.005080859:0.0309422667457324  
0.091621473:0.047966165:0.012193313:0.0309471883605986  
0.076018752:0.054438969:0.007147732:0.0309666015624582  
0.861069115:0.736775744:0.038712650:0.0309704927772881  
0.035709083:0.022813127:0.004013043:0.0309725607237392  
0.899257403:0.800530479:0.029797879:0.0310043432105328  
0.047643792:0.027137114:0.008208899:0.0310430730397713  
0.039004436:0.022915297:0.005515062:0.0310742102013133  
0.077412025:0.032782191:0.013676444:0.0310998822517278  
0.180590845:0.048804781:0.036119970:0.0311428848376905  
0.041235298:0.020260427:0.006354320:0.0311546724568469  
0.094482376:0.054132156:0.013036751:0.031165175682614  
0.397368129:0.032495822:0.107538482:0.0311753523435123  
0.660921028:0.459025857:0.064351044:0.0312245882400205  
0.914776796:0.871021577:0.016734648:0.0313103074852464  
0.679896856:0.529442474:0.055210591:0.0313527493412049  
0.562070621:0.441368492:0.041761906:0.0313627378357401  
0.885272117:0.744243677:0.050905973:0.0314398290730144  
0.918172158:0.783523114:0.039669269:0.0314457898168414  
0.941887389:0.878913348:0.017804891:0.0314484094430771  
0.656358036:0.375569953:0.075268411:0.0314532793287818  
0.166281633:0.042729197:0.038585639:0.0314754807860885  
0.583217792:0.335798766:0.078352989:0.031481621485447  
0.493920562:0.380423277:0.043596667:0.0315261059008997  
0.431875193:0.241798815:0.068073496:0.0315622255927166  
0.174963045:0.121247273:0.018496047:0.0315966080266857  
0.932312550:0.815494290:0.035565439:0.0316124503074682  
0.900828753:0.775250183:0.041153974:0.0316254332148791

0.026672554|0.016541661|0.003074434|0.0316438301542488  
0.059425833|0.033140250|0.008439834|0.0317155447842439  
0.322969387|0.176281378|0.041543533|0.0317591487394932  
0.182002053|0.064597879|0.040954072|0.0317680904644287  
0.072618862|0.043319406|0.011036014|0.0317818655685939  
0.386982653|0.317587946|0.025536131|0.0317838891642357  
0.128838374|0.054987109|0.021159626|0.031831994365364  
0.037222687|0.018701530|0.005257680|0.0318328777699987  
0.049489142|0.024828070|0.008004658|0.0318394735000194  
0.175754293|0.047847015|0.041342239|0.0318560542456852  
0.028680585|0.015965286|0.004346515|0.0318729261509329  
0.059296697|0.027083970|0.010162376|0.0318793190957185  
0.136954959|0.064142823|0.021921138|0.031935326542527  
0.141180425|0.082327979|0.016733464|0.0319557702438481  
0.355472601|0.027709204|0.158743002|0.0319567998525433  
0.042132703|0.023828493|0.005357410|0.031982499398067  
0.069929399|0.044549447|0.009774875|0.0320076680706314  
0.822783384|0.648964829|0.059377185|0.0320728273509032  
0.051041742|0.027390216|0.006437988|0.0320876143004798  
0.035511590|0.020061681|0.005327676|0.0320959200799968  
0.087916200|0.063412069|0.008038565|0.0321058465758498  
0.870314264|0.504278008|0.132411719|0.0321552660169134  
0.952867232|0.925326366|0.008913533|0.0321872553941352  
0.760145735|0.620252022|0.045336115|0.0322070296276401  
0.084220836|0.050499798|0.011839585|0.0322190463216666  
0.055402749|0.025303072|0.010082924|0.0322243833028259  
0.943872562|0.795164693|0.047129213|0.0322314758120628  
0.085195448|0.039158926|0.012935121|0.0323274835294557  
0.684265851|0.179811757|0.143806617|0.0323522508400141  
0.760823178|0.654574273|0.034155927|0.0323584272760439  
0.909636607|0.817024306|0.032592544|0.0323733723549653  
0.057099829|0.019585968|0.012316388|0.0323878921624669  
0.806106144|0.709111385|0.029429153|0.0324319076586112  
0.029971540|0.022226291|0.002299926|0.0325100977261119  
0.778666798|0.658429183|0.038300117|0.0325158235924078  
0.039170972|0.020905242|0.005942482|0.0325374077052648  
0.897858233|0.807901357|0.030731509|0.0325591267142531  
0.075460052|0.036961711|0.011572129|0.032560963984423  
0.130036139|0.061134397|0.019249369|0.0325683495941493  
0.863008064|0.752049895|0.034490979|0.0325804530504468  
0.849706451|0.731661402|0.037240054|0.0325888327977569  
0.842035568|0.787984894|0.019201127|0.0326015292019592  
0.471674735|0.055255036|0.157373545|0.0326273426051868  
0.132121789|0.033111687|0.028387986|0.0326567446070592

0.039298033:0.027377616 0.004299452:0.032658409768729  
0.129959616:0.054087810:0.025288620`0.0327542820908278  
0.137579421|0.107792709|0.011128750|0.0328544153136874  
0.047879591|0.024192845|0.008031006`0.03290095835876  
0.119105909:0.085447930:0.009813309:0.0329168545520188  
0.145065626:0.069042702|0.026153040|0.032955074072084  
0.051963768:0.034571817:0.006039806:0.0329913480165571  
0.170033371|0.124813356|0.016552534:0.0330481433229936  
0.093361713|0.037364755|0.016424666:0.033117064990972  
0.545163009:0.413944915`0.037491092:0.0331171376523352  
0.039327949:0.023955570:0.004934749:0.0331188328576273  
0.297793457|0.186564630:0.038827234:0.0331219402435072  
0.824922706|0.673178055`0.049590137:0.0331673969409156  
0.124210510|0.065270300:0.020607219:0.033186604501665  
0.659984501|0.390165389`0.086381782:0.0332107924043196  
0.090688229`0.057484362|0.012703083`0.0332417022170227  
0.043149944|0.029117399:0.004597281:0.0332444425506062  
0.084767028:0.057229342|0.008228440:0.0332902876559071  
0.209390375:0.136009452`0.019879988|0.0333229787990137  
0.041853188`0.023125368`0.006397442:0.0333334037125297  
0.939228450:0.824676001:0.039052218:0.0333623743070216  
0.033176588|0.019034008`0.005179790|0.0333776281494835  
0.049455298|0.031725932`0.005064397:0.033456769723924  
0.586096671`0.367752212`0.086315586:0.0334700943192499  
0.046847028:0.032301907:0.004329091:0.0335103089443767  
0.515357606|0.376336288|0.048070326:0.0335621360004858  
0.085323150:0.041647887:0.013485704`0.0335802402504857  
0.261671526|0.139648998|0.034389418:0.0336045491297123  
0.948290243:0.887861506|0.019824144:0.0336064443108954  
0.039471974:0.021638457:0.005098492:0.0336751591187276  
0.791274594:0.704513274|0.027831635|0.0336805491248776  
0.096407370`0.028439220:0.021876991|0.0337347691051245  
0.046992451:0.029156778|0.004804876:0.0337477820324679  
0.659541444:0.502473880:0.051603587:0.0338074138036306  
0.951911578:0.860282359:0.028627090`0.0338119184178014  
0.153716241|0.031073532:0.042495961:0.0338155838009359  
0.296346791|0.075482551|0.066530274:0.0338516588903938  
0.063875521|0.030985374|0.008756435:0.0339669786860434  
0.203296434|0.050230538:0.044271069:0.0339736589277801  
0.374050858|0.247836822:0.035540175:0.0339769653975255  
0.022721007:0.015978631:0.002421385|0.0340429193972979  
0.526216092`0.309097159`0.072818039|0.0341602489478647  
0.344256805|0.262380475:0.023201001|0.0341942571765204  
0.225278275|0.159835182:0.022171857:0.0341958023226013

0.677295911:0.518673954:0.060096050:0.0343676212323385  
0.542747882:0.392430404:0.059069699:0.0343884442649538  
0.413316237:0.300661873:0.036101424:0.0344089433844698  
0.090575206:0.066604085:0.008555965:0.0344255361950382  
0.286237879:0.193995580:0.027550531:0.0344347513698579  
0.646940769:0.467741076:0.052008806:0.0344746307401967  
0.070338209:0.041135965:0.008954472:0.034493997078544  
0.123219436:0.071299841:0.019204305:0.0345486927986527  
0.039993184:0.025556392:0.005051649:0.0345509627742076  
0.071304406:0.046830178:0.007963747:0.0345732143205267  
0.908238707:0.862071284:0.014098522:0.0347599221321301  
0.911691140:0.866128356:0.015148534:0.0347836452827844  
0.090097404:0.032374482:0.017721944:0.0349199963948511  
0.832557502:0.712689920:0.043098093:0.0349332907981361  
0.047994385:0.028488113:0.006105790:0.0349567782038591  
0.035798075:0.020346969:0.005892068:0.0350709721698564  
0.164638888:0.040243195:0.032660534:0.0350861641461137  
0.123815245:0.053548865:0.019878161:0.0351693202942509  
0.409275353:0.236624449:0.067855106:0.0352038024404823  
0.154480422:0.079432884:0.024201231:0.0352277841534566  
0.953355190:0.926112521:0.007910795:0.0352412383332  
0.901812204:0.841607920:0.017876651:0.0352916166231785  
0.655922926:0.538699987:0.037646035:0.0352928582604551  
0.047298687:0.024928615:0.006394605:0.035294716751857  
0.726127706:0.594774986:0.049574229:0.0353194756277851  
0.043500595:0.021211148:0.006464289:0.0353347347460882  
0.239612647:0.106323229:0.041934474:0.0354055830135955  
0.025295976:0.017371533:0.002447047:0.035454865200427  
0.051754368:0.034644262:0.005673488:0.0354604102392939  
0.086574049:0.038173606:0.014461565:0.0354864468346835  
0.919263866:0.799271686:0.037106371:0.0355710712202166  
0.947810996:0.819037221:0.045456222:0.0355720903326989  
0.069701549:0.044680508:0.008151186:0.0355740226334119  
0.051565584:0.025137334:0.007865548:0.0355806299349259  
0.052954521:0.028677919:0.006317608:0.0356348661400371  
0.924824462:0.771862871:0.048330266:0.0356472857429619  
0.947451234:0.880748153:0.019131601:0.0356587836641657  
0.580285878:0.446615440:0.042603230:0.0356827514545313  
0.466622315:0.373266968:0.028639965:0.0356863330354813  
0.062350024:0.035451585:0.008437987:0.0356985928717757  
0.298624877:0.204804136:0.027114027:0.0357022953788968  
0.066786195:0.032518434:0.010154950:0.0357035542186572  
0.615329905:0.533623885:0.029312940:0.0357245716258991  
0.045865987:0.025778181:0.005780375:0.035729582904216

0.782542284;0.672115278;0.031771043;0.0357604288996363  
0.904171884;0.840799732;0.019138163;0.0358154331387065  
0.091988307;0.029964930;0.018491913;0.0358163874019912  
0.613129778;0.467717150;0.050871412;0.0358353223739908  
0.859701439;0.710748594;0.046989710;0.0358588939569511  
0.059927120;0.036677998;0.006860410;0.0358595008039915  
0.173594455;0.068825261;0.031076064;0.0358636743181931  
0.823128388;0.703574228;0.036907099;0.0358904006217258  
0.023438615;0.014731895;0.002766625;0.0359304512247796  
0.928440370;0.817127502;0.037400549;0.0360085478937931  
0.100642068;0.057933770;0.014716722;0.0360699880187916  
0.838378192;0.756131273;0.028741166;0.0360783722859076  
0.854721324;0.727185912;0.044762979;0.0360929403114298  
0.839181446;0.575387431;0.105547693;0.0361182783749765  
0.905869290;0.022168503;0.332181940;0.0361433500808944  
0.050504473;0.037853202;0.004612314;0.036160597857321  
0.164633872;0.099628868;0.018855839;0.0361693217848966  
0.927740277;0.843637851;0.028447422;0.0361837453042964  
0.077273824;0.053786122;0.006638597;0.036238344771747  
0.035081175;0.014964294;0.005624955;0.036244575691246  
0.928026832;0.841167255;0.025828255;0.0362921683102653  
0.976914319;0.961402938;0.005634012;0.0363986815013882  
0.062698170;0.039532740;0.007811788;0.0364045369008427  
0.914659207;0.854547066;0.020582582;0.0364695522310623  
0.035167582;0.018287799;0.005466734;0.0366442044051336  
0.154239718;0.094885482;0.021518844;0.0366646395949828  
0.065043324;0.039889880;0.007627760;0.0367148166537261  
0.967209163;0.934626155;0.012026001;0.0367573225255921  
0.869662103;0.677469258;0.063374713;0.036816181738972  
0.450298089;0.355707268;0.035767729;0.0368169607962198  
0.085324188;0.049095616;0.010922097;0.0369196389533276  
0.785415827;0.618231113;0.054532254;0.0369202302389802  
0.734789579;0.589379671;0.043161691;0.0369232420069052  
0.644231537;0.426945696;0.063234595;0.0369430880393921  
0.054995313;0.025592004;0.007622968;0.0370289395939517  
0.169493382;0.064653014;0.030278675;0.0370940844882481  
0.074963489;0.035848245;0.013243889;0.0371092040746896  
0.050275404;0.022718166;0.008176313;0.0371212582067897  
0.571005453;0.403862974;0.057970401;0.0371426782588395  
0.923430588;0.872071117;0.015828225;0.0371619310970204  
0.063733740;0.039731728;0.008218807;0.0371919439682726  
0.738493034;0.599504674;0.042260476;0.0372140766739302  
0.054336468;0.027673830;0.008865347;0.0372458669981535  
0.432508749;0.234219706;0.056258650;0.0372908118404454



0.236656430 0.114637945 0.042734040 0.0373951364985916  
0.035512169 0.021257022 0.004367629 0.0374194198410582  
0.900914719 0.863952029 0.011974544 0.0374235238749047  
0.902594750 0.819422112 0.026979977 0.0374740414196152  
0.257091268 0.128343003 0.041878628 0.0374764935529838  
0.073716115 0.053028780 0.006084024 0.0374972037007006  
0.077410862 0.025341766 0.015384989 0.0375426013898698  
0.040800696 0.024469259 0.005209352 0.0375689071791689  
0.891790928 0.807306242 0.026306212 0.0375852238969858  
0.495943521 0.385186685 0.039358501 0.0376001380241695  
0.087265513 0.028820752 0.017005457 0.037624812606834  
0.522324299 0.263136655 0.079680979 0.0376310566693901  
0.082905502 0.047800892 0.010573094 0.0376329805272878  
0.219873251 0.122721721 0.027611622 0.0376493855791978  
0.682109608 0.552900399 0.039601241 0.0376580512809444  
0.761635224 0.638142857 0.042637244 0.0376708694038773  
0.436110428 0.313653323 0.038084083 0.0376831718055553  
0.232985938 0.112984178 0.035618899 0.037705802922835  
0.145207222 0.058459669 0.030551478 0.0377293311305231  
0.085154447 0.042486304 0.014815424 0.0377488948118288  
0.026136149 0.015380919 0.003543383 0.0377592240138774  
0.526380039 0.317475473 0.063337367 0.037803000694241  
0.093833128 0.043714350 0.015520822 0.0378417408219003  
0.073519583 0.030399073 0.014110974 0.0378512036631321  
0.047315023 0.022811849 0.008250169 0.0378526621247873  
0.109480783 0.049546051 0.019275794 0.0379126778343919  
0.401628164 0.336229272 0.021468678 0.0379787631376982  
0.140087450 0.065310897 0.022915299 0.0379981447280848  
0.069465882 0.044733032 0.008707896 0.0379982574656  
0.165303912 0.077443760 0.029231286 0.0380115821540902  
0.052765921 0.021784029 0.008299351 0.0380841136669909  
0.105490135 0.046402907 0.019738388 0.0380965335124833  
0.544118788 0.316814434 0.063305741 0.0381576802052766  
0.728020484 0.540838911 0.066741510 0.0381916265694515  
0.496762771 0.417547790 0.026602514 0.0382390525639072  
0.903587782 0.810671987 0.034292547 0.038272662126851  
0.105856850 0.050736313 0.015716695 0.0382882737536702  
0.105178712 0.051510866 0.015431240 0.0383611014052339  
0.034804098 0.017408127 0.004728233 0.0384064576802605  
0.237940280 0.155597651 0.025284618 0.0384886729178449  
0.931070211 0.888059321 0.013447275 0.0384888671239876  
0.025866707 0.018125163 0.003120193 0.0384903750856603  
0.031728233 0.018424620 0.004336309 0.0384935949096852  
0.071626092 0.036540491 0.012508713 0.0385050560017011

0.070159357!0.046975231!0.006902654!0.0385176966273369  
0.052085914!0.023057001!0.007976140!0.0385374916693764  
0.045035948!0.025706659!0.007111164!0.0385485135498246  
0.866512966!0.731767488!0.042128261!0.0385726557854818  
0.054323044!0.037741441!0.004757675!0.038607912955172  
0.904227994!0.776274031!0.043887248!0.0386175039466262  
0.888186924!0.749108253!0.042514958!0.0386217685780932  
0.130437909!0.061765026!0.024772907!0.0387353025932836  
0.851851676!0.658989856!0.065029143!0.0387959951118491  
0.149816524!0.027989992!0.037116946!0.0388095645217985  
0.675144279!0.310951491!0.118251651!0.0388867365960683  
0.042120645!0.023377409!0.005722646!0.0389092850604766  
0.075966294!0.044175066!0.009361663!0.038925256982818  
0.103344300!0.045315992!0.017889087!0.0389341363448653  
0.811005578!0.712917535!0.037867590!0.0390584607602788  
0.033296573!0.016770260!0.005329667!0.0391016470976953  
0.864040862!0.782357580!0.026875277!0.0391718024981034  
0.919977002!0.849587061!0.021055202!0.0391898879003681  
0.053749617!0.021787316!0.009477623!0.0391900855643242  
0.504398529!0.229216972!0.086573279!0.0392155880405792  
0.093277200!0.038867678!0.015261006!0.039218665167531  
0.072556429!0.032044485!0.012282395!0.0392253488924034  
0.945931784!0.893402246!0.016268759!0.0392415532947315  
0.053269493!0.023215055!0.008647608!0.0392558319130536  
0.840778690!0.682562127!0.049795591!0.0392758283159446  
0.289332561!0.188626920!0.031891199!0.0392925317840909  
0.215505235!0.156435003!0.019275407!0.0392964084512347  
0.179804966!0.085145885!0.027261639!0.0393124044480366  
0.432575459!0.232678721!0.080600333!0.0393160728681123  
0.795069012!0.588429100!0.069023245!0.0393166531463282  
0.058906050!0.032047716!0.009419113!0.0393226929617628  
0.502460916!0.368995210!0.044820278!0.0393418135237928  
0.078814701!0.048268154!0.011661820!0.039403074509299  
0.056604234!0.038021705!0.006191944!0.039511977690834  
0.202669221!0.134491738!0.021390953!0.0395283108672444  
0.361026531!0.162425464!0.060075840!0.0395970519112402  
0.863085689!0.680720983!0.056507401!0.0396055493212054  
0.916462034!0.867903701!0.012817495!0.0396150751434131  
0.053189358!0.026492441!0.008130383!0.0396208318633633  
0.648774980!0.415888717!0.069065907!0.0396456816460992  
0.132212211!0.074152107!0.019029948!0.039672037256461  
0.872400981!0.793102314!0.022739516!0.0396897779489423  
0.313406567!0.163973942!0.045062449!0.039692318286054  
0.836186844!0.597610237!0.080416524!0.0397192913272051

0.318617288 0.266554829 0.020348108 0.0397430410865826  
0.932671135 0.873511892 0.020351239 0.0397590441951658  
0.870574925 0.792580795 0.027292370 0.0397780514823545  
0.887539047 0.823056184 0.021738329 0.0397809764573206  
0.050115374 0.027526088 0.006783601 0.0397972100770926  
0.273044113 0.139216565 0.045982682 0.0398223200856571  
0.105301289 0.068444827 0.010037437 0.0398578512271589  
0.059716991 0.028554292 0.009854575 0.0398885796136641  
0.936105961 0.870281134 0.019767602 0.0399640316493085  
0.469569080 0.278010292 0.057061404 0.0399694286930429  
0.076186808 0.050386017 0.007307817 0.0399867346286039  
0.324726445 0.145409233 0.046644226 0.0399904712669771  
0.040440190 0.020357790 0.006623365 0.0399910824027184  
0.759445947 0.665841962 0.037035582 0.0400697829034908  
0.225927323 0.115095340 0.036574779 0.0400799196748593  
0.815278433 0.614442650 0.056537212 0.0401535760961708  
0.058203544 0.025897779 0.010512949 0.0401601135648273  
0.280812592 0.170307773 0.042355723 0.0401655273553589  
0.142856997 0.059895981 0.023679050 0.0401666410257491  
0.075588533 0.022498828 0.016870195 0.0401948999273516  
0.973702851 0.954089289 0.006258466 0.0402629559037859  
0.206760613 0.143947688 0.022898649 0.0402671145618735  
0.629709838 0.513144547 0.033333882 0.0403074412728818  
0.888605622 0.676510804 0.056850749 0.0403541423919142  
0.281500293 0.096300131 0.056175629 0.0403706846338586  
0.328506317 0.209327637 0.040515002 0.0403918154443545  
0.083808445 0.054072764 0.010566762 0.0403997247588659  
0.081528023 0.022057101 0.020420779 0.040503834552423  
0.221336865 0.069612930 0.057047711 0.0405355716102564  
0.941678073 0.867116567 0.019811244 0.0405902924011564  
0.077323275 0.047522909 0.008892581 0.0406119354991279  
0.084498944 0.046472788 0.012336360 0.0406252985086161  
0.799161991 0.664010653 0.038001104 0.0406504751388831  
0.103322587 0.068589169 0.011837381 0.040689976758356  
0.653607079 0.438485794 0.071580074 0.0407370960736855  
0.592223419 0.421096278 0.053697774 0.0408155220096959  
0.899634085 0.805928869 0.032374025 0.0408170552727578  
0.229314377 0.132981958 0.033006884 0.0408599828457688  
0.700822257 0.599425665 0.027944434 0.0408780498682287  
0.215552633 0.149560021 0.022053378 0.0409050096400192  
0.445144315 0.336670687 0.039847751 0.0409257946917247  
0.644104938 0.577669394 0.021069628 0.0409550762398428  
0.829138346 0.769864215 0.018939979 0.0410301992576804  
0.348691490 0.279400195 0.025330593 0.0410308569423322

0.029513644;0.018625010 0.003135990;0.0410580624337968  
0.162484355;0.052525857;0.037930564;0.041067114467273  
0.296690307;0.083821316 0.061385453;0.0411191424549695  
0.720083948;0.563016292;0.044272227;0.0411400790387821  
0.603657274;0.439386785;0.058922053;0.0411638353757309  
0.258132672;0.197307044 0.020161037;0.041184870623187  
0.873575693;0.665918029;0.060034402;0.0412751387794675  
0.586979311;0.325566184 0.100247617;0.0412764780635064  
0.090440279 0.034508012;0.014525379;0.0413185180079358  
0.882389013;0.750774838 0.041249518;0.0413203349511876  
0.863415647;0.805077673;0.017487357 0.041366043959073  
0.325280319;0.207712248;0.042995292 0.0414545637239868  
0.812221312 0.621483920;0.064716186;0.0414815844037837  
0.923693648 0.782621832;0.051939700;0.0414825443856114  
0.048351228 0.026704391;0.008091390 0.0416593378451759  
0.759010884;0.517160352;0.072182563;0.0416944071426689  
0.077821965;0.032172496;0.013526396;0.0416977595975059  
0.081230589;0.058097862;0.006595495 0.0417311904419612  
0.043636984;0.023848567 0.005577635 0.0419563075005889  
0.771742596;0.582425224;0.057661391;0.0419765244932789  
0.961818459;0.904575426;0.019636720;0.0419841878560594  
0.134475096 0.064388017 0.023941593;0.0419879748381212  
0.716505936 0.513357298;0.062412634;0.0419897479828588  
0.245394112;0.141351588 0.029414440;0.0420579937823045  
0.572685483;0.449464314;0.040235113;0.0420685303523304  
0.035501151;0.022551420;0.004597861 0.0420967869774232  
0.927401454;0.797869700 0.048719029;0.042119286995499  
0.048344424;0.029003226 0.006161155;0.0421224265489651  
0.714720873;0.584779684 0.042215337;0.0421417140529151  
0.086081533;0.040187177;0.015240900;0.0421526198834121  
0.415322807;0.273138838;0.040071139;0.0421651480161392  
0.363450735;0.249603648 0.041731458 0.0421716357781838  
0.097372119;0.040530713;0.016960392;0.0422106730464168  
0.048835041 0.023502992;0.008547110;0.0422176700990142  
0.356429903 0.270283410 0.026344744;0.0422766775240321  
0.032109809;0.017763340 0.004262736 0.0423127717432205  
0.794885346;0.707500221;0.026482965;0.042317883645269  
0.043392946;0.023990100 0.005277172;0.0423617757694512  
0.800147901;0.595846781;0.064075248;0.0423621914682373  
0.260038259;0.124246709 0.039115447 0.0423920918549063  
0.041522831;0.027788501;0.003865522;0.0424328368509317  
0.034096137;0.022861695;0.004107542 0.042440205095373  
0.098173891 0.070758041;0.009553192 0.0424455991585117  
0.852814756;0.657083091 0.056799860;0.0424559869267136

0.555504729|0.404102612|0.052562121|0.0424767898106538  
0.909114673|0.843037368|0.018867786|0.0425421905744148  
0.602567302|0.436674651|0.053555300|0.04257064122455  
0.597654669|0.459375619|0.040588583|0.0426433353216031  
0.089106287|0.037855921|0.015535389|0.0426710429172142  
0.667873665|0.482052586|0.053497676|0.0426758221236604  
0.728160335|0.503134215|0.075217968|0.0427268295419281  
0.903974169|0.734622685|0.064890869|0.0427586633431344  
0.461996536|0.335270413|0.036896469|0.0428369825373404  
0.041371196|0.024566389|0.005564509|0.0428572817633706  
0.139656539|0.050840647|0.027548511|0.0428926527164674  
0.091848277|0.036923450|0.020957218|0.0428949409273452  
0.821769509|0.679346661|0.045209325|0.0429501778694935  
0.206276554|0.128504744|0.027150492|0.0429822735477829  
0.795203054|0.730912913|0.020416673|0.0430001926466466  
0.245578592|0.118560566|0.046636789|0.0430539151829511  
0.030469286|0.015338550|0.005108685|0.0431048882832744  
0.406347960|0.326563166|0.026764066|0.0432249498428488  
0.491191346|0.289264950|0.054661670|0.0432536640228035  
0.852854935|0.529838921|0.085938913|0.043295590280085  
0.873850609|0.693975826|0.051587422|0.0433160746965177  
0.057010711|0.034539483|0.007795696|0.0433618366551909  
0.056900596|0.026408499|0.008755472|0.0433809041362177  
0.106160727|0.056893008|0.015196818|0.0434086129314063  
0.771752940|0.564219069|0.064784404|0.04341318704602  
0.502132719|0.374610669|0.043849688|0.0434214676085632  
0.216709177|0.128451392|0.031429873|0.043437917017095  
0.196687504|0.081189655|0.041212885|0.0434603478760993  
0.062469450|0.033127722|0.009812278|0.0435096529155847  
0.244174018|0.181852982|0.018753659|0.043526916540427  
0.102501521|0.070154504|0.011619463|0.0435437260770734  
0.574126522|0.430764793|0.039489908|0.0435647181247213  
0.063534688|0.033939576|0.008567101|0.0435722370751206  
0.579271914|0.438690553|0.042145053|0.0435731708488255  
0.936960444|0.900900555|0.011490700|0.043636691636388  
0.938093029|0.868352579|0.022228786|0.0436669208458859  
0.448099706|0.356401905|0.025016350|0.0436710476150255  
0.043867777|0.015031268|0.007976084|0.0436943545902449  
0.918569237|0.838128141|0.022478666|0.0437734740871296  
0.059154015|0.033427816|0.007217148|0.0438785064265632  
0.878450998|0.773525491|0.033629728|0.0438931031342022  
0.767039698|0.583423441|0.055973955|0.0439399116267096  
0.154136909|0.052329586|0.032250482|0.0439976260067308  
0.059716518|0.033031247|0.007595890|0.0440346812231822

0.069955777|0.036022435|0.009957943|0.0440649074614006  
0.721924181|0.536700752|0.062127667|0.0440859172688522  
0.968580893|0.871760699|0.030656672|0.0441090538567763  
0.039218866|0.021860633|0.005508740|0.0441203633178474  
0.063367542|0.024897435|0.010912659|0.0441631080247719  
0.890477295|0.616264338|0.088298448|0.044198770484108  
0.067834875|0.033173757|0.011129933|0.0442338017888396  
0.826375982|0.559472772|0.073214772|0.0442529051912646  
0.074105929|0.038031150|0.010423345|0.0442695250196799  
0.051902320|0.032005006|0.007115582|0.0442832248836251  
0.455787662|0.365873672|0.028413273|0.044290074208245  
0.071436496|0.038873164|0.009271833|0.0443138255976198  
0.509878180|0.408244892|0.031333912|0.0443205499775305  
0.276585565|0.100935355|0.059681166|0.0444092553963332  
0.179623682|0.095687131|0.023619909|0.0444137446976809  
0.416706217|0.288883751|0.041940004|0.0444654371963357  
0.743673564|0.488878911|0.082181592|0.0444937222493857  
0.908080342|0.831151580|0.023576546|0.0445006918744937  
0.367377179|0.207658184|0.047022311|0.0445369815176731  
0.849851340|0.751263904|0.031503068|0.0445643574498618  
0.075452001|0.039448436|0.009672382|0.0445681917144318  
0.035560256|0.023720924|0.004075428|0.0445759172728998  
0.125043635|0.047019284|0.027053888|0.0446717294552177  
0.054882512|0.033334183|0.007332207|0.0446906988454089  
0.091784131|0.026914547|0.020587724|0.0447018065237594  
0.322474355|0.231156826|0.033135918|0.04471166439797  
0.148279373|0.063682953|0.024120958|0.0447139338138007  
0.048297395|0.021633155|0.008704556|0.0447446541694946  
0.249078980|0.126110274|0.038894567|0.0447601093450916  
0.754778620|0.598546302|0.044469020|0.0447951237664278  
0.049598351|0.034833569|0.005640157|0.0448420815377944  
0.937921310|0.911693769|0.009412728|0.0448449936186108  
0.181225240|0.063119302|0.035351091|0.0448582487163826  
0.122715823|0.031685461|0.029496614|0.0448750521548888  
0.713047229|0.605138935|0.034079109|0.0450086399539053  
0.280626186|0.156871446|0.031384199|0.0450455410680043  
0.136604299|0.049451830|0.025657827|0.0452112351004229  
0.465170812|0.315960197|0.048905948|0.0452832967187147  
0.516251541|0.262372107|0.085454638|0.0453540122217673  
0.834699835|0.691539021|0.048839644|0.0454421557860923  
0.087063018|0.031172339|0.016853660|0.0454452700648533  
0.073350331|0.041678283|0.011908873|0.0454990956691151  
0.495442976|0.377291957|0.041288296|0.0454999660806468  
0.869307968|0.746700459|0.037548722|0.0455184431964726

0.090248505!0.030256905!0.018903411!0.0455188257053724  
0.044226987!0.027425343!0.005680669!0.0455476692190288  
0.046696830!0.025993311!0.005981297!0.0455560159733007  
0.041813734!0.028517844!0.003961290!0.0455614573524487  
0.069759609!0.030062977!0.011911767!0.0456125325835192  
0.079827697!0.045981445!0.010190189!0.0456487145047129  
0.107460158!0.037004507!0.023862986!0.0456650672198723  
0.103755621!0.030129798!0.021583351!0.04567618796845  
0.032302237!0.012897563!0.005433546!0.0457985856765189  
0.525564528!0.235531738!0.084898237!0.0458505148353248  
0.087894004!0.047417077!0.012212486!0.0458521705886168  
0.111002352!0.033569879!0.019730418!0.0458564077143121  
0.066378611!0.029156262!0.011184608!0.0459015454530176  
0.659585181!0.497276026!0.052410443!0.0459190274306282  
0.950666684!0.885236759!0.023676581!0.0459270728680236  
0.807155988!0.614560221!0.056008016!0.0459860120185126  
0.764743638!0.669310635!0.034475750!0.0459891870453052  
0.778986907!0.624695562!0.054078820!0.0460314217871448  
0.925000176!0.868429395!0.019565268!0.0460520472398753  
0.869526721!0.647201356!0.079496287!0.0461028860920069  
0.022147037!0.013410286!0.003080543!0.046124189970438  
0.958902346!0.899590306!0.019531787!0.0461247490949789  
0.939180957!0.897089627!0.013461247!0.0461584069339548  
0.072289028!0.040624959!0.011758646!0.0462062458803172  
0.067617851!0.028808230!0.012104272!0.0462149837429115  
0.595715792!0.426226761!0.055929448!0.0462320077584919  
0.115688939!0.024573194!0.026698085!0.0462761590342182  
0.112308642!0.059530612!0.017716545!0.0463123467555401  
0.130754421!0.052556099!0.023470528!0.0464482700200989  
0.049109587!0.022280929!0.008030086!0.0465341512081049  
0.078917184!0.046555717!0.009903105!0.0465639544424913  
0.035071417!0.023453959!0.004017926!0.0467553255876441  
0.733028052!0.612498860!0.038884395!0.0467638160213345  
0.888986594!0.793397552!0.029358698!0.0468363634227325  
0.163526765!0.047026287!0.034589815!0.0468995504754023  
0.903914689!0.790491917!0.039597508!0.046908088709969  
0.204776123!0.116673298!0.029894407!0.0469168702341546  
0.754022271!0.531493104!0.078591260!0.0469524211024526  
0.066736048!0.029081837!0.013251983!0.0469532932996103  
0.103508055!0.030106780!0.021484306!0.0470969685383492  
0.426291717!0.312563203!0.038391114!0.0470975146142256  
0.650826242!0.444817441!0.063486701!0.0470996412834659  
0.823049876!0.638468795!0.056025858!0.0471103454013543  
0.047865494!0.022900877!0.008621092!0.0471115926448972

0.101324035|0.041310386|0.016179374|0.0471173462277193  
0.529946494|0.395900693|0.041868930|0.0471406587732726  
0.043688730|0.029239301|0.004976591|0.0471730504411402  
0.029385956|0.017520170|0.003467086|0.0472091441611551  
0.606839162|0.478138734|0.044151583|0.0472586286002657  
0.718487046|0.623106057|0.032312419|0.0472587989731534  
0.046469325|0.029180035|0.005988037|0.0472688541977104  
0.796023708|0.657247947|0.047468997|0.04736969037645  
0.547546988|0.400965708|0.044610790|0.047414730364128  
0.742495887|0.555309309|0.050976898|0.0474258084074531  
0.086977555|0.057734271|0.009258667|0.047502575788548  
0.659630310|0.497939845|0.044167233|0.0476035476846887  
0.785870774|0.658594179|0.041815326|0.047712647792188  
0.826911794|0.658028150|0.064917461|0.0477129420339362  
0.198983194|0.107181413|0.028265427|0.047817630873715  
0.172874391|0.062379648|0.033564479|0.0478354404255053  
0.068469071|0.037108533|0.011281786|0.0479376705760988  
0.324333403|0.243767970|0.024425722|0.0479580918950901  
0.384361152|0.300940059|0.027862293|0.0480260468544265  
0.934281532|0.890721532|0.012725459|0.0480339832327335  
0.210680263|0.141277939|0.026990031|0.0480420384574054  
0.074803304|0.040215168|0.012028208|0.0480645454916346  
0.141145140|0.085858684|0.015997637|0.0481135810978321  
0.037023541|0.022983118|0.004079171|0.0481482808064864  
0.774127489|0.493220253|0.082691421|0.0482374923024455  
0.845793278|0.712262649|0.041782907|0.0482512611239366  
0.874030053|0.823222339|0.016640728|0.0483407924182921  
0.057167619|0.029119518|0.007328584|0.0483628862572969  
0.082173889|0.037603703|0.014367689|0.0483638548460149  
0.046151621|0.029898320|0.005264437|0.0483924915638751  
0.616250451|0.425278131|0.055820516|0.0484626765952426  
0.144929000|0.039748957|0.030760317|0.0485064111958001  
0.060557227|0.032021746|0.008619066|0.0486216175061583  
0.129704117|0.049835522|0.023214517|0.0486458141845022  
0.074610469|0.039298224|0.012493762|0.0486494220837098  
0.106582522|0.063873343|0.012159260|0.0486759558285448  
0.040503978|0.026459555|0.004926146|0.0487074653935655  
0.125658477|0.059509743|0.017686246|0.0487137651481747  
0.686041801|0.559468031|0.038576694|0.0487364234046789  
0.346439293|0.215707570|0.040856585|0.0487627732836765  
0.096601061|0.052974853|0.013146879|0.0487726558395335  
0.067499394|0.029602504|0.011723975|0.0488112721635818  
0.643191575|0.547678847|0.029014433|0.048882099252789  
0.062591016|0.031795352|0.009394161|0.0489034199951553



0.063505777!0.018075929!0.012473254!0.04893212970358  
0.719845018!0.532601296!0.052042259!0.0489901802437244  
0.929526140!0.868228350!0.020624662!0.0490854865219844  
0.052390809!0.020278341!0.009590076!0.0491417582427899  
0.462336557!0.279893386!0.054270845!0.0491492400098768  
0.510153089!0.314982570!0.058104782!0.0491780245372582  
0.220524488!0.136895841!0.029227628!0.0491879475208447  
0.052543266!0.023468627!0.009258105!0.0492243663423264  
0.087756622!0.051248687!0.010818015!0.0493007681584402  
0.571965469!0.438878928!0.048868811!0.0493027994624731  
0.490619989!0.265693733!0.082126240!0.0493425500268512  
0.398495420!0.118299137!0.080939140!0.0493526086873914  
0.923195413!0.876335376!0.020733015!0.0493651016447277  
0.042754254!0.026510185!0.004415747!0.0493805973921936  
0.464179271!0.381606198!0.024296114!0.0493936300496554  
0.885909226!0.283252595!0.280296405!0.0494467206599497  
0.084574610!0.037282581!0.013570664!0.0494857554907995  
0.053278191!0.027295006!0.009702363!0.049575528415524  
0.413482501!0.248246031!0.048278890!0.0496434480259802  
0.059655034!0.035943639!0.007157033!0.0496839960607885  
0.053403167!0.023129607!0.008992341!0.049734425739527  
0.027996728!0.014127226!0.003837333!0.0498457310750152  
0.701277101!0.553467891!0.051122909!0.0498883097426093  
0.075995415!0.038589816!0.012383080!0.0499025720752024  
0.802537811!0.560578132!0.075447824!0.0499117237573219  
0.385220228!0.041516040!0.102233947!0.0499162274738246  
0.059555499!0.033638212!0.008398277!0.0499764269064447  
0.586233703!0.426650588!0.048007061!0.0499833560259752

| Name       | CHR | Probe_SNP  | Probe_SNP_UCSC_RefGer | UCSC_RefGer  | UCSC_RefGer    |
|------------|-----|------------|-----------------------|--------------|----------------|
| cg22662482 | 11  |            | FEN1;C11orf1          | NM_004111;   | 5'UTR;TSS150   |
| cg08643007 | 2   |            | ATF2;ATF2;            | M NM_001880; | 1stExon;5'UT   |
| cg01109243 | 16  |            | NDE1;MIR484;          | NM_0011439   | TSS1500;TSS1   |
| cg07925542 | 16  |            | MIR484;NDE1;          | NR_030159;   | Body;1stExon   |
| cg01522721 | 19  |            | MIR1181;CDC           | NR_031592;   | TSS1500;TSS1   |
| cg00735591 | 19  |            | DNM2;DNM2             | NM_004945;   | TSS200;TSS200  |
| cg13770529 | 17  |            | CCDC55;MIR4           | NM_032141;   | TSS200;TSS150  |
| cg01629329 | 20  |            | NOP56;MIR1            | NM_006392;   | 1stExon;TSS2   |
| cg10271981 | 19  |            | MIR1181;CDC           | NR_031592;   | TSS1500;TSS2   |
| cg03655940 | 16  |            | MIR484;NDE1;          | NR_030159;   | Body;1stExon   |
| cg10248302 | 11  |            | MIR611;FEN1           | NR_030342;   | TSS200;5'UTR   |
| cg20041381 | 1   |            | C1orf27;C1or          | NM_0011642   | TSS1500;TSS1   |
| cg10387807 | 1   |            | C1orf27;C1or          | NM_0011642   | TSS1500;TSS1   |
| cg02690648 | 8   |            | PINX1;MIR13           | NM_017884;   | Body;TSS200    |
| cg11168235 | 3   |            | MIR548G;C3c           | NR_031662;   | Body;TSS200    |
| cg21019820 | 3   |            | MIR191;NDU            | NR_029690;   | TSS1500;5'UT   |
| cg11581046 | 19  |            | MIR639;TECR           | NR_030369;   | TSS1500;TSS1   |
| cg06333167 | 2   |            | PRKRA;DFNB1           | NM_0011395   | TSS1500;TSS2   |
| cg02585417 | 12  |            | MIR618;LIN7           | NR_030349;   | TSS1500;Body   |
| cg25102782 | 2   |            | PRKRA;DFNB1           | NM_0011395   | TSS1500;TSS2   |
| cg12480658 | 2   |            | ATF2;MIR933           | NM_001880;   | TSS1500;TSS1   |
| cg08737296 | 20  |            | MIR124-3              | NR_029670    | TSS1500        |
| cg14278808 | 8   | rs75492345 | LOC157627;            | N NR_024281; | TSS1500;TSS2   |
| cg17602882 | 19  |            | MIR1181;CDC           | NR_031592;   | TSS200;TSS200  |
| cg27294431 | 1   |            | TPR;C1orf27;          | NM_003292;   | TSS1500;TSS2   |
| cg19484886 | 12  |            | C12orf61;MIF          | NM_175895;   | TSS1500;TSS2   |
| cg10470963 | 22  |            | ANKRD54;MII           | NM_138797;   | TSS1500;TSS2   |
| cg18654971 | 5   |            | MIR449C;CDC           | NR_031572;   | TSS1500;TSS1   |
| cg13149127 | 1   |            | C1orf61;MIR5          | NM_006365;   | 5'UTR;TSS150   |
| cg22050893 | 2   |            | MIR548N;FKE           | NR_031666;   | Body;Body;Body |
| cg01656221 | 2   |            | MIR548N               | NR_031666    | Body           |
| cg17992509 | 1   |            | MIR760                | NR_030621    | TSS200         |
| cg00485047 | 16  |            | NDE1;MIR484;          | NM_0011439   | TSS1500;TSS1   |
| cg13343238 | 15  |            | MIR548H4;GI           | NR_031680;   | Body;5'UTR     |
| cg25851152 | 10  |            | MIR146B               | NR_030169    | TSS1500        |
| cg00328051 | 14  |            | DIO3;MIR124           | NM_001362;   | TSS1500;TSS2   |
| cg17774634 | 6   |            | C6orf167;MIF          | NM_198468;   | 5'UTR;Body     |
| cg02975060 | 14  |            | MIR1185-2             | NR_031571    | TSS1500        |
| cg17002091 | 14  |            | SLC25A29;MII          | NM_0010393   | 1stExon;TSS1   |
| cg22537343 | 19  |            | MIR525                | NR_030192    | TSS1500        |

|            |    |            |                                        |
|------------|----|------------|----------------------------------------|
| cg12959622 | 20 |            | SNORD12B;CNR_003695;NTSS1500;Bod       |
| cg05249271 | 14 |            | MIR496;MIR1NR_030176;NTSS1500;TSS2     |
| cg22725901 | 19 |            | MIR518C NR_030199 TSS1500              |
| cg19045894 | 2  |            | ATF2;MIR933 NM_001880;TSS1500;TSS1     |
| cg06401019 | 5  |            | FAM172A;FANR_028080;NT Body;Body;Bc    |
| cg08445226 | 3  |            | C3orf26;MIR5 NM_032359;NT Body;Body    |
| cg01068014 | 13 |            | MIR17HG;MIR1 NR_027349;NT Body;Body    |
| cg04288299 | 4  |            | WHSC2;MIR9 NM_005663;NT Body;TSS1500   |
| cg13285968 | 2  |            | ZNF385B;MIR6 NM_152520;NT 5'UTR;TSS200 |
| cg02662576 | 14 |            | MIR495 NR_030175 TSS200                |
| cg26106778 | 6  |            | RING1;MIR21 NM_002931;NTSS1500;TSS1    |
| cg10866755 | 2  |            | ZNF385B;MIR6 NM_152520;NT 5'UTR;TSS200 |
| cg16204151 | 19 | rs60314070 | MIR523 NR_030193 TSS1500               |
| cg04735310 | 17 |            | MIR196A1 NR_029582 TSS1500             |
| cg08515869 | 4  |            | MIR573 NR_030299 TSS1500               |
| cg03894789 | 5  |            | MIR874;KLHL NR_030588;NTSS200;Body     |
| cg12778580 | 11 |            | MIR1237;RPS NR_031602;NTSS1500;Bod     |
| cg07439409 | 6  |            | MIR548H3;C6 NR_031679;NT Body;TSS1500  |
| cg15987431 | 1  | rs61740910 | MIR1182;FANR_031593;NTSS200;Body       |
| cg23002708 | 19 | rs34998465 | ATG4D;MIR11 NM_032885;NT Body;TSS1500  |
| cg19945937 | 14 |            | MIR665 NR_030617 Body                  |
| cg07987890 | 15 |            | MIR548H4 NR_031680 Body                |
| cg02895602 | 14 | rs76713753 | MIR1185-2 NR_031571 TSS200             |
| cg01630479 | 22 |            | MIR1306;DGC NR_031706;NTSS1500;5'UT    |
| cg24823137 | 19 |            | MIR372;MIR5 NR_029865;NTSS1500;TSS2    |
| cg12530503 | 15 |            | MIR9-3 NR_029692 TSS200                |
| cg02287710 | 14 |            | DIO3;MIR124 NM_001362;NTSS200;TSS15    |
| cg19646028 | 19 |            | MIR7-3;C19orf1 NR_029607;NTSS1500;Bod  |
| cg08131204 | 22 |            | MIR1281 NR_031694 TSS1500              |
| cg12885549 | 2  |            | MIR548N NR_031666 Body                 |
| cg17109533 | 19 |            | MIR515-2;MIR1 NR_030187;NTSS1500;TSS1  |
| cg13965908 | 11 |            | PPFIA1;PPFIA NM_003626;NT Body;Body;TS |
| cg04184179 | 5  |            | MIR874;KLHL NR_030588;NTSS200;Body     |
| cg18384960 | 14 |            | MIR299;MIR4 NR_029841;NTSS1500;TSS2    |
| cg22420044 | 7  |            | MCM7;MCM7 NM_005916;NT Body;Body;TS    |
| cg18588811 | 14 |            | MIR377 NR_029869 TSS1500               |
| cg26039305 | 11 |            | MIR670 NR_031577 TSS1500               |
| cg18319687 | 5  |            | MIR1229;MG NR_031598;NTSS200;Body;     |
| cg10822545 | 19 |            | MIR181D;MIR6 NR_030179;NTSS200;Body    |
| cg06083642 | 7  |            | CHPF2;MIR67 NM_019015;NT Body;TSS1500  |
| cg00565075 | 22 |            | MIR659;EIF3L NR_030396;NTSS1500;TSS1   |

|            |    |                      |                                       |
|------------|----|----------------------|---------------------------------------|
| cg08508227 | 20 |                      | C20orf166;NM_178463; Body;TSS200      |
| cg16621560 | 13 |                      | MIR548F5;DCNR_031646; Body;Body       |
| cg15085006 | 3  |                      | DHX30;DHX31;NM_138615; Body;Body;TS   |
| cg26171815 | 5  |                      | MIR580;LMB1;NR_030306; TSS1500;5'UT   |
| cg10715527 | 8  |                      | ANK1;MIR484;NM_000037; 3'UTR;TSS200   |
| cg07126399 | 14 |                      | MIR412;MIR5 NR_030155; TSS1500;TSS1   |
| cg23257859 | 7  | rs2923266            | MIR550-2 NR_030320 TSS200             |
| cg14892570 | 19 |                      | MIR1470;WIZ;NR_031716; TSS1500;5'UT   |
| cg01572694 | 17 |                      | MIR10A NR_029608 TSS1500              |
| cg17594424 | 15 | rs11555369 rs1049531 | MIR1282;SER;NR_031695; TSS200;3'UTF   |
| cg00283662 | 19 |                      | MIR642;GIPR;NR_030372; TSS200;Body    |
| cg11032038 | 16 | rs80101105           | MIR1826 NR_031727 TSS200              |
| cg18645493 | 1  |                      | MIR190B NR_030600 TSS1500             |
| cg19537184 | 19 |                      | MIR520C;MIF;NR_030198; TSS1500;TSS2   |
| cg16572540 | 19 |                      | MIR24-2 NR_029497 TSS200              |
| cg09393453 | 19 |                      | MIR517B;MIF;NR_030205; Body;TSS1500   |
| cg16865908 | 11 |                      | LOC399959;NR_024430; Body;Body        |
| cg09484214 | 19 |                      | MIR372;MIR5 NR_029865; TSS200;TSS15   |
| cg09522706 | 7  |                      | MCM7;MCM7;NM_005916; Body;Body;TS     |
| cg01273384 | 20 |                      | MIR1257 NR_031658 TSS1500             |
| cg09994773 | 1  |                      | MIR34A NR_029610 TSS1500              |
| cg11915671 | 19 |                      | TUBB4;MIR22;NM_006087; Body;TSS200    |
| cg20333067 | 17 |                      | ZNF207;MIR6;NM_0010322 TSS1500;TSS2   |
| cg27633139 | 4  |                      | MIR548I2 NR_031688 TSS1500            |
| cg07429629 | 14 |                      | MIR494 NR_030174 TSS1500              |
| cg16745104 | 20 |                      | MIR941-1;MI;NR_030637; TSS1500;TSS1   |
| cg22806002 | 11 |                      | BTG4;MIR34C;NM_017589; TSS200;TSS15   |
| cg24260710 | 22 |                      | MIR33A;SREB;NR_029507; TSS1500;Body   |
| cg04155485 | 7  |                      | MIR589;FBXL;NR_030318; TSS1500;Body   |
| cg20206204 | 12 |                      | MIR614 NR_030345 TSS1500              |
| cg04114269 | 3  |                      | C3orf26;FILIP;NM_032359; Body;5'UTR;B |
| cg08264885 | 8  | rs78882264           | POLR3D;MIR3;NM_001722; Body;TSS1500   |
| cg12846583 | 3  |                      | MIR1324 NR_031714 TSS1500             |
| cg01729066 | 9  |                      | MIR600;C9orf;NR_030331; Body;Body     |
| cg07236884 | 12 |                      | MIR614 NR_030345 TSS200               |
| cg00328284 | 8  |                      | ANK1;ANK1;NM_020476; Body;Body;Bc     |
| cg01521220 | 17 | rs77574787           | MIR1203;SKA;NR_031607; Body;Body;Bc   |
| cg09538129 | 7  |                      | MIR25;MCM7;NR_029498; TSS1500;Body    |
| cg02616186 | 1  |                      | NAV1;MIR12;NM_0011677 Body;TSS200;    |
| cg00944580 | 1  |                      | DAB1;MIR54;NM_021080; 5'UTR;TSS150    |
| cg01983504 | 20 |                      | PANK2;MIR1C;NM_153638; Body;TSS200;   |

|            |    |            |              |             |                 |
|------------|----|------------|--------------|-------------|-----------------|
| cg24616828 | 7  |            | MIR96        | NR_029512   | TSS200          |
| cg11235787 | 17 |            | MIR195       | NR_029712   | Body            |
| cg26916936 | 11 |            | LOC399959;M  | NR_024430;M | Body;TSS200     |
| cg01514668 | 11 |            | MIR129-2     | NR_029697   | TSS1500         |
| cg01965047 | 16 |            | PKD1;MIR122  | NM_0010099  | Body;TSS1500    |
| cg18340059 | 14 |            | RTL1;MIR431  | NM_0011348  | 1stExon;TSS200  |
| cg19356389 | 6  |            | RING1;MIR21  | NM_002931;M | TSS1500;TSS1500 |
| cg26180383 | 8  |            | MIR1207;PVT  | NR_031612;M | TSS1500;Body    |
| cg01644741 | 20 |            | MIR1259;SNC  | NR_031660;M | Body;Body;Body  |
| cg27495572 | 2  | rs11896779 | TTN;TTN;TTN  | NM_133378;M | Body;Body;Body  |
| cg25105745 | 1  |            | MIR197       | NR_029583   | TSS1500         |
| cg14431528 | 14 |            | MIR453;MIR4  | NR_029969;M | TSS1500;TSS1500 |
| cg15212137 | 19 |            | MIR519A1     | NR_030218   | TSS1500         |
| cg05468584 | 10 |            | MIR202       | NR_030170   | TSS200          |
| cg09148270 | 11 |            | BTG4;C11orf  | NM_017589;M | TSS1500;TSS1500 |
| cg14148088 | 14 |            | MIR494       | NR_030174   | TSS200          |
| cg03964851 | 5  | rs77830550 | MIR1974;C5c  | NR_031738;M | TSS200;5'UTR    |
| cg05066959 | 8  | rs72638959 | ANK1;ANK1;A  | NM_020476;M | Body;Body;Body  |
| cg14184693 | 15 |            | SERF2;MIR12  | NM_0010181  | Body;Body       |
| cg01734628 | 6  |            | RDBP;SKIV2L; | NM_002904;M | Body;TSS1500    |
| cg09422614 | 19 |            | CACNG8;MIR   | NM_031895;M | Body;TSS1500    |
| cg12974668 | 6  |            | MIR1275      | NR_031681   | TSS1500         |
| cg21300318 | 19 |            | MIR7-3;C19o  | NR_029607;M | TSS1500;Body    |
| cg01244514 | 14 |            | MIR494       | NR_030174   | TSS200          |
| cg26332552 | 3  |            | MIR922;KIAA  | NR_030627;M | TSS1500;Body    |
| cg14674124 | 10 | rs78846868 | MIR202       | NR_030170   | TSS200          |
| cg24082174 | 3  |            | SNORA63;MII  | NR_002586;M | TSS1500;TSS1500 |
| cg19348206 | 10 |            | MIR202       | NR_030170   | TSS200          |
| cg16704590 | 20 |            | C2orf199;C2  | NR_003605;M | Body;Body;TS    |
| cg09763180 | 10 |            | MIR202       | NR_030170   | TSS200          |
| cg11902380 | 12 |            | MIR1228;LRP  | NR_031597;M | TSS1500;Body    |
| cg12029639 | 13 |            | MIR548F5;NE  | NR_031646;M | Body;Body;TS    |
| cg03549146 | 16 |            | MIR140;WWI   | NR_029681;M | TSS200;Body;    |
| cg06237697 | 17 |            | MIR365-2     | NR_029856   | TSS200          |
| cg16383389 | 1  |            | MIR760       | NR_030621   | Body            |
| cg27617225 | 8  |            | CPSF1;MIR12  | NM_013291;M | Body;TSS200     |
| cg12446939 | 1  |            | ASH1L;MIR55  | NM_018489;M | Body;TSS1500    |
| cg23068797 | 19 |            | DNM2;MIR19   | NM_004945;M | Body;TSS1500    |
| cg19273756 | 17 |            | SKA2;SKA2;M  | NM_182620;M | Body;Body;TS    |

| Relation_to_IDMR | Enhancer | CONT1       | CONT2       | CONT3       | CONT4       |
|------------------|----------|-------------|-------------|-------------|-------------|
| S_Shore          | NA       | 0.020081987 | 0.016656580 | 0.022576118 | 0.020730079 |
| Island           | NA       | 0.015667878 | 0.016804944 | 0.018756226 | 0.022210022 |
| .500;5'UTR       | NA       | 0.027968080 | 0.020501608 | 0.023168285 | 0.022339365 |
| ;5'UTR;TSS200    | NA       | 0.017252039 | 0.023937871 | 0.015456373 | 0.017017360 |
| Island           | NA       | 0.017777390 | 0.019823577 | 0.014612273 | 0.015350735 |
| Island           | NA       | 0.023586105 | 0.024279664 | 0.020895129 | 0.016823852 |
| Island           | NA       | 0.022995723 | 0.024557346 | 0.021431194 | 0.026311146 |
| Island           | NA       | 0.030334216 | 0.024905751 | 0.017763166 | 0.014367370 |
| Island           | NA       | 0.018227038 | 0.022591813 | 0.019642475 | 0.025313483 |
| ;5'UTR;TSS1500   | NA       | 0.027513338 | 0.018275248 | 0.019085640 | 0.021327418 |
| Island           | NA       | 0.023096929 | 0.033705024 | 0.022071265 | 0.027751256 |
| Island           | NA       | 0.029605287 | 0.036820453 | 0.036783205 | 0.035420253 |
| N_Shore          | NA       | 0.019144480 | 0.022260689 | 0.019316880 | 0.024203923 |
|                  | NA       | 0.030193293 | 0.035563438 | 0.028881646 | 0.026300771 |
| Island           | NA       | 0.026220508 | 0.020606083 | 0.022064642 | 0.023321147 |
| Island           | NA       | 0.025840935 | 0.020897375 | 0.023993847 | 0.023619582 |
| Island           | NA       | 0.030279195 | 0.030455016 | 0.029913069 | 0.026506560 |
| Island           | NA       | 0.033769518 | 0.031979214 | 0.028075365 | 0.036042176 |
| Island           | DMR      | 0.035465610 | 0.031469238 | 0.022082291 | 0.027854577 |
| Island           | NA       | 0.029786126 | 0.021477580 | 0.025487568 | 0.024750865 |
| Island           | NA       | 0.043381009 | 0.035212510 | 0.040123442 | 0.043232631 |
| Island           | NA       | 0.039209792 | 0.037945690 | 0.038353308 | 0.026329060 |
| Island           | NA       | 0.033056443 | 0.041531331 | 0.041150253 | 0.037961859 |
| Island           | NA       | 0.040974484 | 0.025090475 | 0.029710346 | 0.024343749 |
| Island           | NA       | 0.023024216 | 0.029313263 | 0.029925139 | 0.021097640 |
| Island           | NA       | 0.041026054 | 0.032272462 | 0.032704599 | 0.027582861 |
| S_Shore          | NA       | 0.050790499 | 0.040916177 | 0.037359158 | 0.049975928 |
| S_Shore          | TRUE     | 0.053143890 | 0.059111402 | 0.044445962 | 0.043184300 |
| Island           | TRUE     | 0.047090486 | 0.040163661 | 0.042411288 | 0.045455739 |
| N_Shore          | NA       | 0.037960891 | 0.040536119 | 0.030763368 | 0.039642227 |
| Island           | DMR      | 0.055174369 | 0.060636571 | 0.058952194 | 0.055690526 |
| Island           | NA       | 0.055087265 | 0.073701581 | 0.063607993 | 0.058849323 |
| .500;5'UTR       | NA       | 0.039851622 | 0.038286796 | 0.031896941 | 0.029424940 |
| Island           | NA       | 0.048498324 | 0.036689557 | 0.028535794 | 0.030693061 |
| S_Shelf          | TRUE     | 0.072077994 | 0.083767789 | 0.071283014 | 0.064422270 |
| Island           | NA       | 0.037950127 | 0.041726826 | 0.036080463 | 0.033734597 |
| N_Shore          | NA       | 0.037371177 | 0.046061557 | 0.032357670 | 0.038566987 |
|                  | NA       | 0.904479393 | 0.933816348 | 0.913396767 | 0.914194002 |
| Island           | NA       | 0.048226686 | 0.040000226 | 0.046191921 | 0.048997349 |
|                  | NA       | 0.910760169 | 0.925376903 | 0.887678314 | 0.886833742 |

|             |      |             |             |             |             |
|-------------|------|-------------|-------------|-------------|-------------|
| S_Shore     | NA   | 0.056544618 | 0.066097004 | 0.049764854 | 0.057423351 |
| !00         | NA   | 0.897462396 | 0.933810578 | 0.899928970 | 0.896311338 |
|             | NA   | 0.891204876 | 0.909260607 | 0.889066180 | 0.871080187 |
| S_Shore     | NA   | 0.050713772 | 0.062283266 | 0.077428918 | 0.058269315 |
| Island      | NA   | 0.027366758 | 0.044432910 | 0.020810074 | 0.033764345 |
| Island      | NA   | 0.080047799 | 0.083905551 | 0.071151009 | 0.078138113 |
| Island      | NA   | 0.059895171 | 0.050774531 | 0.054557564 | 0.050550761 |
| S_Shore     | NA   | 0.913516902 | 0.926711589 | 0.875613162 | 0.928087516 |
| N_Shore     | NA   | 0.083099079 | 0.080915426 | 0.072768480 | 0.067383200 |
|             | NA   | 0.884847759 | 0.915981413 | 0.873463170 | 0.877548106 |
| N_Shore     | NA   | 0.076507769 | 0.073867634 | 0.053140238 | 0.054437809 |
| Island      | NA   | 0.044879592 | 0.046145224 | 0.041395606 | 0.044457896 |
|             | NA   | 0.884892887 | 0.901631069 | 0.866941956 | 0.862775750 |
| Island      | NA   | 0.135006862 | 0.129533553 | 0.121465604 | 0.117485519 |
|             | NA   | 0.906495777 | 0.899155608 | 0.890822844 | 0.872400769 |
|             | NA   | 0.870559134 | 0.892957336 | 0.900528071 | 0.885732834 |
| N_Shore     | NA   | 0.856560149 | 0.862606849 | 0.855895865 | 0.854145920 |
| S_Shore     | NA   | 0.068773384 | 0.062169880 | 0.058395704 | 0.066832338 |
|             | TRUE | 0.867056902 | 0.892797429 | 0.871409626 | 0.856171295 |
| )           | NA   | 0.848014924 | 0.878946143 | 0.871910163 | 0.870124723 |
|             | TRUE | 0.857071256 | 0.883742296 | 0.859063943 | 0.872331455 |
| Island      | NA   | 0.125325128 | 0.154908493 | 0.131028557 | 0.134469198 |
|             | NA   | 0.897562752 | 0.918057250 | 0.877568410 | 0.873531534 |
| N_Shore     | NA   | 0.830959300 | 0.812023246 | 0.761731170 | 0.811593228 |
| !00;TSS1500 | NA   | 0.819048199 | 0.897939582 | 0.845041934 | 0.852043927 |
| Island      | TRUE | 0.107105794 | 0.149158561 | 0.106979147 | 0.124387086 |
| Island      | NA   | 0.052975406 | 0.073751009 | 0.088513762 | 0.101176782 |
| γ           | NA   | 0.084685600 | 0.128424872 | 0.098527654 | 0.117998291 |
| N_Shore     | NA   | 0.044680595 | 0.059179646 | 0.053458438 | 0.042564536 |
| S_Shore     | NA   | 0.037880388 | 0.051204669 | 0.046409626 | 0.041318161 |
| .500        | NA   | 0.903961979 | 0.919868115 | 0.870995067 | 0.834791085 |
| !S1500      | NA   | 0.829942425 | 0.858483832 | 0.779891175 | 0.801656604 |
|             | NA   | 0.845548331 | 0.852939983 | 0.824396535 | 0.857071530 |
| !00         | NA   | 0.838562392 | 0.837535504 | 0.789655413 | 0.817766463 |
| !S200       | NA   | 0.150477791 | 0.202593119 | 0.128279025 | 0.140670413 |
|             | NA   | 0.812377952 | 0.837525741 | 0.791796398 | 0.832447923 |
|             | TRUE | 0.124436115 | 0.139032792 | 0.084042415 | 0.152483721 |
| S_Shore     | NA   | 0.807004263 | 0.845354254 | 0.805736992 | 0.816100662 |
| S_Shore     | NA   | 0.780872201 | 0.879518480 | 0.818780791 | 0.853007660 |
| S_Shore     | NA   | 0.388677225 | 0.414830197 | 0.337740987 | 0.361484364 |
| N_Shore     | NA   | 0.096217527 | 0.117560831 | 0.136475424 | 0.133921486 |

|                           |      |      |             |             |             |             |
|---------------------------|------|------|-------------|-------------|-------------|-------------|
|                           |      | NA   | 0.840651712 | 0.853285236 | 0.820408833 | 0.847435304 |
|                           |      | TRUE | 0.780522799 | 0.765041336 | 0.771230733 | 0.752449614 |
| N_Shore                   |      | NA   | 0.837835262 | 0.828113717 | 0.766312602 | 0.815762186 |
| N_Shore                   |      | NA   | 0.828446685 | 0.802962048 | 0.796798646 | 0.838690243 |
| );Body;3'UTR;Body;Body;Bo |      | NA   | 0.821809515 | 0.798528690 | 0.750335983 | 0.819784976 |
| N_Shore                   |      | NA   | 0.805699650 | 0.823841293 | 0.748278699 | 0.798345570 |
| S_Shelf                   |      | NA   | 0.705434020 | 0.720020018 | 0.665894984 | 0.698528357 |
| R                         | CDMR | NA   | 0.223703286 | 0.226530677 | 0.161150247 | 0.166967121 |
| N_Shore                   | RDMR | NA   | 0.325206088 | 0.350210222 | 0.306912914 | 0.312926694 |
| S_Shore                   |      | NA   | 0.586503673 | 0.649172609 | 0.578161103 | 0.572062282 |
| N_Shelf                   |      | NA   | 0.841549204 | 0.834665121 | 0.799349937 | 0.779566295 |
| Island                    |      | NA   | 0.579759563 | 0.583918750 | 0.495896441 | 0.497759418 |
|                           |      | NA   | 0.683685060 | 0.686566961 | 0.670375823 | 0.658049117 |
| !00                       |      | NA   | 0.404272329 | 0.403717216 | 0.381660048 | 0.362541450 |
| S_Shelf                   |      | NA   | 0.599916270 | 0.662931519 | 0.558720929 | 0.624874302 |
| )                         |      | NA   | 0.423320623 | 0.436654471 | 0.386402840 | 0.365245378 |
|                           |      | TRUE | 0.058683843 | 0.080164992 | 0.069153274 | 0.047010595 |
| !00                       |      | NA   | 0.705541756 | 0.799895716 | 0.792065150 | 0.742516338 |
| !S200;Body                |      | NA   | 0.270185959 | 0.314069061 | 0.214080766 | 0.246232759 |
|                           |      | NA   | 0.460429046 | 0.467097474 | 0.407668484 | 0.353112692 |
|                           |      | NA   | 0.793646886 | 0.854205895 | 0.831231398 | 0.804493567 |
| Island                    |      | NA   | 0.562002160 | 0.592288408 | 0.515801895 | 0.517667830 |
| N_Shore                   |      | NA   | 0.316824966 | 0.335811537 | 0.294533699 | 0.309572869 |
|                           |      | NA   | 0.542854950 | 0.524974248 | 0.486414315 | 0.503033873 |
|                           |      | NA   | 0.804157720 | 0.822024718 | 0.808187944 | 0.805755561 |
| N_Shore                   |      | NA   | 0.307665681 | 0.331581594 | 0.345643387 | 0.393168761 |
| N_Shore                   |      | NA   | 0.315545459 | 0.337638594 | 0.294684315 | 0.316978140 |
| γ                         |      | NA   | 0.718549031 | 0.750298275 | 0.619773962 | 0.671629637 |
| S_Shore                   |      | NA   | 0.670318751 | 0.717375039 | 0.625049478 | 0.613789030 |
|                           |      | NA   | 0.709764868 | 0.831022022 | 0.776885330 | 0.795513930 |
| ody;5'UTR                 |      | TRUE | 0.737716799 | 0.755371074 | 0.690173396 | 0.709373090 |
| S_Shore                   |      | NA   | 0.407552298 | 0.425764172 | 0.388515507 | 0.393047241 |
|                           |      | NA   | 0.746523206 | 0.736383938 | 0.753674737 | 0.710023803 |
|                           |      | NA   | 0.241062689 | 0.223738924 | 0.167570435 | 0.151673949 |
|                           |      | TRUE | 0.544521464 | 0.662860846 | 0.539848708 | 0.576831525 |
| ody;Body;Body;Body;Body;T |      | NA   | 0.727547794 | 0.699015182 | 0.719229954 | 0.748961833 |
| ody                       |      | NA   | 0.507219889 | 0.466953652 | 0.451689492 | 0.374715722 |
| γ;Body;TSS200;TSS1500     |      | NA   | 0.439401774 | 0.467902672 | 0.371820906 | 0.455286292 |
| Body                      |      | NA   | 0.768636202 | 0.776088773 | 0.683879713 | 0.698336932 |
| !0                        |      | NA   | 0.646964121 | 0.742805582 | 0.755722449 | 0.731370591 |
| Body;Body                 |      | TRUE | 0.468246186 | 0.528771328 | 0.411593326 | 0.429221964 |



|                           |      |      |             |             |             |             |
|---------------------------|------|------|-------------|-------------|-------------|-------------|
| N_Shelf                   |      | NA   | 0.619169013 | 0.620317940 | 0.549157067 | 0.529257196 |
| S_Shelf                   |      | NA   | 0.492285170 | 0.507969031 | 0.414857177 | 0.425628433 |
|                           |      | TRUE | 0.066528889 | 0.083200621 | 0.083587578 | 0.067433294 |
| N_Shore                   | CDMR | TRUE | 0.077790590 | 0.082967596 | 0.089736641 | 0.085770397 |
| Island                    |      | NA   | 0.432798289 | 0.474855627 | 0.364367324 | 0.459256567 |
| N_Shore                   |      | NA   | 0.553118622 | 0.583111489 | 0.500861364 | 0.491020910 |
| N_Shore                   |      | NA   | 0.167160914 | 0.201724093 | 0.150945658 | 0.157404552 |
| γ                         |      | TRUE | 0.757838717 | 0.731057063 | 0.765757220 | 0.748180995 |
| S_Shore                   | RDMR | NA   | 0.389846394 | 0.378102448 | 0.354883991 | 0.322067676 |
| ody;Body;Body             |      | NA   | 0.773203223 | 0.808425166 | 0.759249624 | 0.720330825 |
|                           |      | NA   | 0.501693370 | 0.586360385 | 0.553165693 | 0.566107914 |
| .500;TSS200               |      | TRUE | 0.738873058 | 0.796005660 | 0.682992781 | 0.688695389 |
|                           |      | NA   | 0.601300501 | 0.666259253 | 0.604380235 | 0.570652209 |
|                           |      | NA   | 0.631426479 | 0.635955515 | 0.601103005 | 0.562201072 |
| N_Shore                   |      | NA   | 0.323546926 | 0.356354924 | 0.277538368 | 0.268608594 |
|                           |      | NA   | 0.777354544 | 0.742230392 | 0.722039610 | 0.717967518 |
| ;5'UTR                    |      | NA   | 0.657099514 | 0.707457614 | 0.568261354 | 0.682545397 |
| ody;Body;Body;Body;Body;T |      | NA   | 0.770869801 | 0.844389543 | 0.910892516 | 0.881622576 |
| S_Shore                   |      | NA   | 0.497735421 | 0.515140873 | 0.510079027 | 0.463730553 |
| N_Shore                   |      | NA   | 0.684633985 | 0.703934715 | 0.633836629 | 0.619246823 |
| N_Shore                   |      | NA   | 0.524682174 | 0.638409569 | 0.666151954 | 0.660447816 |
|                           |      | NA   | 0.478429778 | 0.563571450 | 0.442007598 | 0.537420680 |
| γ                         |      | NA   | 0.218814417 | 0.319168082 | 0.217510540 | 0.291601275 |
|                           |      | NA   | 0.566487481 | 0.635372509 | 0.552858509 | 0.609753666 |
| γ;Body                    |      | NA   | 0.716635960 | 0.705489162 | 0.748209696 | 0.747326439 |
|                           |      | NA   | 0.763241562 | 0.804200037 | 0.776685986 | 0.754931399 |
| S_Shore                   | RDMR | NA   | 0.369974858 | 0.442613072 | 0.321275661 | 0.375764846 |
|                           |      | NA   | 0.497669583 | 0.554195709 | 0.439563498 | 0.403313077 |
| S_Shore                   | RDMR | NA   | 0.458437315 | 0.518768404 | 0.470684041 | 0.446593738 |
|                           |      | NA   | 0.679864211 | 0.720727591 | 0.656116392 | 0.665915883 |
| γ                         |      | NA   | 0.453868597 | 0.297615035 | 0.377244628 | 0.414432330 |
| N_Shore                   | RDMR | NA   | 0.337832473 | 0.423247068 | 0.370383435 | 0.263324512 |
| Body                      |      | NA   | 0.979105800 | 0.982017122 | 0.974426764 | 0.969636836 |
|                           |      | NA   | 0.952134545 | 0.964630721 | 0.950773834 | 0.947843617 |
| Island                    |      | NA   | 0.053956770 | 0.034766948 | 0.048659913 | 0.055113802 |
| S_Shelf                   |      | NA   | 0.969437737 | 0.967997943 | 0.967482456 | 0.958119848 |
| )                         |      | NA   | 0.948150686 | 0.946198505 | 0.925469515 | 0.949014531 |
| );Body;Body;Body          |      | NA   | 0.795467768 | 0.847906031 | 0.813162535 | 0.860331360 |
| N_Shelf                   |      | NA   | 0.801179179 | 0.852797530 | 0.829629712 | 0.753283555 |

| CONT5       | CONT6       | CONT7       | CONT8       | CONT9       | DA1         | DA2         |
|-------------|-------------|-------------|-------------|-------------|-------------|-------------|
| 0.023844927 | 0.025334590 | 0.024586415 | 0.025837752 | 0.023250725 | 0.023433390 | 0.026012643 |
| 0.016830285 | 0.021474076 | 0.022948674 | 0.021792394 | 0.020785708 | 0.023784845 | 0.021479513 |
| 0.018997640 | 0.025434018 | 0.021115870 | 0.019267683 | 0.022785497 | 0.028062786 | 0.022688815 |
| 0.019992166 | 0.022741515 | 0.017650369 | 0.021138137 | 0.017638498 | 0.019471047 | 0.017446755 |
| 0.016607144 | 0.019548987 | 0.018889149 | 0.016812559 | 0.016466229 | 0.018825542 | 0.028910550 |
| 0.023892128 | 0.027172182 | 0.022029522 | 0.025919123 | 0.025360447 | 0.024346309 | 0.024561492 |
| 0.019244574 | 0.025583466 | 0.027578937 | 0.030796691 | 0.032106200 | 0.030648630 | 0.032671214 |
| 0.015251647 | 0.026790851 | 0.017180364 | 0.022416535 | 0.023910202 | 0.025485287 | 0.028286581 |
| 0.024653621 | 0.029677052 | 0.023770710 | 0.026925058 | 0.031804188 | 0.024055207 | 0.028834717 |
| 0.020050709 | 0.023801563 | 0.020532931 | 0.021047090 | 0.023553877 | 0.030447722 | 0.028681542 |
| 0.024880364 | 0.024219737 | 0.023397828 | 0.020940725 | 0.026674919 | 0.029269255 | 0.032362350 |
| 0.032867431 | 0.044941548 | 0.041891937 | 0.039496712 | 0.041819297 | 0.042730221 | 0.038841785 |
| 0.018253191 | 0.024605306 | 0.025288430 | 0.024729754 | 0.021869456 | 0.029515087 | 0.035493348 |
| 0.024655584 | 0.038313797 | 0.031343343 | 0.035875438 | 0.027698770 | 0.028014984 | 0.036709174 |
| 0.019182358 | 0.028419651 | 0.023610400 | 0.036048486 | 0.018901803 | 0.019225630 | 0.025952657 |
| 0.028369031 | 0.041527825 | 0.026012288 | 0.033341822 | 0.032812956 | 0.021633155 | 0.046965381 |
| 0.027946860 | 0.029343320 | 0.031611738 | 0.029467013 | 0.032311717 | 0.030890563 | 0.033219426 |
| 0.027777848 | 0.037569153 | 0.024426143 | 0.031665208 | 0.039077059 | 0.033470549 | 0.042851325 |
| 0.032004992 | 0.045709593 | 0.030949009 | 0.046904734 | 0.040525850 | 0.038390967 | 0.036991389 |
| 0.026170617 | 0.028693265 | 0.031823348 | 0.026057400 | 0.030603632 | 0.043535515 | 0.039079528 |
| 0.035584526 | 0.039738152 | 0.047886752 | 0.034345668 | 0.047650356 | 0.043041521 | 0.042425462 |
| 0.024633963 | 0.044413490 | 0.034557534 | 0.047204789 | 0.036428171 | 0.037374871 | 0.042134609 |
| 0.035991315 | 0.045148422 | 0.050443723 | 0.052848165 | 0.040512807 | 0.047711099 | 0.050904287 |
| 0.024107696 | 0.035985086 | 0.026447917 | 0.031356585 | 0.027232291 | 0.027689091 | 0.045053912 |
| 0.029536889 | 0.028093019 | 0.021730852 | 0.022407737 | 0.032129696 | 0.033238237 | 0.038027808 |
| 0.035143328 | 0.042941569 | 0.038505660 | 0.043281261 | 0.042310508 | 0.046583881 | 0.045298367 |
| 0.041079523 | 0.048120508 | 0.054498851 | 0.046643400 | 0.052412910 | 0.044285614 | 0.068624178 |
| 0.047900717 | 0.057482333 | 0.050873922 | 0.058063651 | 0.056156720 | 0.061791821 | 0.067966335 |
| 0.046863764 | 0.040649271 | 0.047866598 | 0.046475106 | 0.052819374 | 0.056697304 | 0.053772836 |
| 0.026319439 | 0.032132690 | 0.049519360 | 0.037002100 | 0.037569471 | 0.041080960 | 0.037893309 |
| 0.063792395 | 0.074168461 | 0.062282399 | 0.068107730 | 0.065207540 | 0.062064066 | 0.066273546 |
| 0.069347049 | 0.061390554 | 0.058701366 | 0.063892466 | 0.071553471 | 0.082072601 | 0.070742871 |
| 0.032383500 | 0.036342912 | 0.026746577 | 0.035492236 | 0.034199072 | 0.043038631 | 0.045858124 |
| 0.035454989 | 0.047616540 | 0.037964893 | 0.053533004 | 0.038702756 | 0.029892020 | 0.042300009 |
| 0.063326458 | 0.066922174 | 0.069072881 | 0.078067984 | 0.086644724 | 0.094126763 | 0.092351226 |
| 0.025608876 | 0.041812364 | 0.033963206 | 0.050828929 | 0.035961970 | 0.034541929 | 0.042507384 |
| 0.026537115 | 0.082712582 | 0.046710866 | 0.051224548 | 0.037916592 | 0.043353615 | 0.042523947 |
| 0.881950281 | 0.894215966 | 0.912974077 | 0.929380736 | 0.914988115 | 0.915118933 | 0.920440597 |
| 0.045242048 | 0.057463823 | 0.051288645 | 0.055012145 | 0.060466724 | 0.047513717 | 0.070539764 |
| 0.888103400 | 0.876580530 | 0.895438493 | 0.926349456 | 0.906800385 | 0.910514977 | 0.913713952 |

0.053007374 0.071996956 0.065656424 0.064183890 0.054585026 0.072347975 0.062350822  
0.909206880 0.894999930 0.892435149 0.903248463 0.914663186 0.918576522 0.911185123  
0.887230182 0.874033867 0.885631384 0.886131901 0.886794150 0.885098086 0.918577422  
0.053091725 0.082453475 0.061594992 0.057351560 0.057027743 0.057587577 0.075642463  
0.025098828 0.054009175 0.048371113 0.029268805 0.023679727 0.036732976 0.042039046  
0.061658678 0.084061122 0.079255866 0.089613314 0.074478133 0.089835557 0.097381115  
0.074591729 0.065116966 0.071033622 0.083130668 0.075118509 0.053902666 0.073191898  
0.885521946 0.909181573 0.897698577 0.935399197 0.920413611 0.936559567 0.930577359  
0.032137618 0.066136207 0.078745943 0.072409191 0.083386174 0.098976530 0.097093235  
0.892347964 0.868110155 0.884166285 0.896646419 0.919750985 0.900869475 0.919385411  
0.058570617 0.073650508 0.076729788 0.081392619 0.063825157 0.062849099 0.086690601  
0.046245515 0.058884337 0.059393552 0.068988232 0.061959383 0.056389468 0.094662207  
0.853034462 0.879067557 0.866581101 0.897682509 0.914206137 0.908441055 0.898805317  
0.122618056 0.121319995 0.127057269 0.131701389 0.152014371 0.129375207 0.141140162  
0.899930617 0.870045367 0.895043002 0.878605103 0.903058315 0.903095352 0.912339355  
0.887524488 0.855574981 0.869495113 0.905268471 0.906434466 0.926835598 0.892779146  
0.873646410 0.845201343 0.835559688 0.862295293 0.867264726 0.880228390 0.871765870  
0.043929448 0.083291261 0.068828705 0.066388479 0.068277471 0.068579869 0.077386134  
0.859506110 0.862611903 0.864488376 0.899440945 0.883263287 0.890231091 0.898730503  
0.852836869 0.820547489 0.857563495 0.866991544 0.859991010 0.866960018 0.894736857  
0.878181845 0.822467076 0.863046180 0.834129252 0.856159058 0.890621177 0.875227279  
0.134017692 0.161479817 0.179104112 0.148595011 0.194573228 0.151813685 0.149560021  
0.883813613 0.860742694 0.880413577 0.883492006 0.888792604 0.907392030 0.912687747  
0.789618231 0.835166757 0.784963616 0.783578383 0.802966568 0.827321078 0.805077673  
0.857989454 0.861602393 0.867709441 0.895987004 0.838900258 0.889794642 0.873570151  
0.128547661 0.143897945 0.140941133 0.114078456 0.145621345 0.128912827 0.148857610  
0.088403949 0.120195861 0.088243932 0.078949216 0.046357875 0.104238256 0.126210355  
0.098678653 0.159224947 0.103635636 0.150779925 0.129062809 0.107992368 0.156848113  
0.033486000 0.068942301 0.042906055 0.056132445 0.043919400 0.048830911 0.056775441  
0.029938492 0.068943331 0.042352538 0.061508694 0.055652713 0.043807722 0.053104967  
0.816908900 0.828120778 0.867012209 0.904162562 0.861182801 0.925000176 0.899807737  
0.835763743 0.772814643 0.797577251 0.816176049 0.837318437 0.847669294 0.835493929  
0.853797858 0.841543928 0.849889332 0.888981262 0.887909917 0.893743295 0.874377929  
0.856641008 0.795585682 0.823720556 0.839956387 0.855033548 0.856747579 0.865365659  
0.095758563 0.107370413 0.153799157 0.173659527 0.155246015 0.151688367 0.189438838  
0.863214756 0.859908587 0.847253662 0.866417233 0.836306982 0.817538389 0.874414851  
0.208384635 0.138108991 0.148155870 0.130157680 0.145470166 0.139377773 0.181271857  
0.830050392 0.771317583 0.791506031 0.838829021 0.842846853 0.819696458 0.845539736  
0.820837909 0.834709687 0.829861548 0.859423570 0.821170829 0.852979713 0.848213303  
0.384080427 0.372500851 0.360700004 0.380531356 0.378670304 0.386759474 0.394379954  
0.123713938 0.139500325 0.113453787 0.141841504 0.131220697 0.142081037 0.119881482

0.824029176 0.798973977 0.796538954 0.810400541 0.862832786 0.908082817 0.859705357  
0.804434982 0.693024476 0.748811501 0.760472099 0.779501043 0.794258697 0.790282257  
0.830379404 0.787710653 0.828848055 0.856736204 0.824330340 0.836982800 0.845662090  
0.873817217 0.817064467 0.824113697 0.815271631 0.821289539 0.847557016 0.887363492  
0.830538620 0.780245063 0.807439487 0.822959486 0.836528606 0.783460730 0.847930242  
0.785949998 0.771644452 0.778604739 0.817814514 0.828605746 0.817048364 0.823232676  
0.734036070 0.703023802 0.693236240 0.722762707 0.720129575 0.752062462 0.711338420  
0.199296555 0.205403716 0.198607979 0.202811802 0.179910060 0.187899066 0.235206456  
0.295286014 0.343185625 0.306757092 0.353945662 0.355475346 0.350530481 0.331915339  
0.621131106 0.577166283 0.595292897 0.590553852 0.634475993 0.629892914 0.609233878  
0.794865223 0.736289393 0.823856556 0.759831754 0.809425391 0.825575723 0.837800945  
0.535610452 0.561827780 0.590171294 0.601098735 0.596133006 0.623989237 0.598072148  
0.663674055 0.646527508 0.641158982 0.687423320 0.713439857 0.690931120 0.706840795  
0.377745353 0.440639671 0.387124757 0.369313875 0.433891436 0.402822188 0.377291957  
0.612108160 0.586238097 0.614946863 0.653742548 0.707357646 0.658966428 0.649600626  
0.386248598 0.406869613 0.400181606 0.408825698 0.424205337 0.406782267 0.400401041  
0.044318973 0.110956978 0.067414796 0.090340680 0.050032931 0.063736016 0.120660114  
0.783107651 0.756859229 0.799923438 0.824446470 0.801166286 0.856005729 0.781508496  
0.249199872 0.217452560 0.236251978 0.266551675 0.259657888 0.277180866 0.263403480  
0.465704183 0.342768552 0.407209905 0.411787263 0.445114685 0.463233821 0.417547790  
0.826989351 0.858473965 0.840757390 0.833933618 0.790309117 0.866898656 0.853878554  
0.495212858 0.495876460 0.505082904 0.550904514 0.560253978 0.576765759 0.571129684  
0.308164812 0.307984725 0.308415632 0.303258133 0.305227038 0.313131200 0.347946437  
0.523305995 0.491154980 0.512573720 0.566876462 0.544437780 0.594816263 0.530524571  
0.870557819 0.852320505 0.785183161 0.842585645 0.802534246 0.850688300 0.869265384  
0.280579297 0.328295948 0.376692363 0.335100977 0.318571423 0.315960197 0.465170812  
0.293063046 0.307406468 0.311252420 0.312138253 0.345774399 0.354113740 0.335282846  
0.691817087 0.650407707 0.635208660 0.733995306 0.697336110 0.732556444 0.721523073  
0.695288131 0.631256106 0.707172137 0.655934205 0.704091148 0.712564847 0.748203477  
0.799914318 0.765162774 0.710899747 0.795111543 0.745304706 0.787211084 0.801298163  
0.708185962 0.739438468 0.732375462 0.778018055 0.784492670 0.767899840 0.774894989  
0.376116295 0.358145433 0.385109075 0.491775795 0.457212045 0.455409260 0.400705299  
0.736686292 0.687182916 0.724177990 0.708824630 0.805444070 0.748108450 0.734341687  
0.133401509 0.129569450 0.192745898 0.203073817 0.189658567 0.207199624 0.244456392  
0.583240144 0.553950460 0.609097449 0.609013335 0.627393449 0.614677060 0.605083832  
0.753087233 0.725513921 0.731571862 0.734637232 0.770800045 0.739159356 0.759605865  
0.370502820 0.358194380 0.390815121 0.427751031 0.465882616 0.521562709 0.442683900  
0.500233280 0.449890717 0.409130780 0.430915968 0.421725551 0.456266910 0.471322605  
0.708689722 0.695200342 0.707103289 0.785230474 0.716747238 0.773078438 0.756607350  
0.775981211 0.815161654 0.752220941 0.699141539 0.789537904 0.785643742 0.769999087  
0.552455084 0.434326980 0.498871194 0.469241103 0.471608331 0.471416205 0.528816157

0.674483593 0.532407308 0.557239207 0.550718464 0.576087103 0.595880984 0.678975996  
0.451572528 0.455059755 0.471653793 0.439388621 0.474244690 0.488978515 0.559916780  
0.046114886 0.149111290 0.091180670 0.098959869 0.071695378 0.075277442 0.121233670  
0.063856584 0.137576148 0.082806656 0.151336228 0.097750225 0.074525934 0.117504898  
0.478300915 0.460973609 0.426237767 0.436583993 0.416341492 0.451184111 0.482145813  
0.537974189 0.484234553 0.490535814 0.498214813 0.534672144 0.543745515 0.603348251  
0.122809505 0.170123806 0.163953336 0.202328973 0.174834404 0.181934557 0.210517271  
0.822594584 0.753971338 0.772018842 0.735410192 0.795457033 0.815046034 0.785898563  
0.319944276 0.296782676 0.321518060 0.405665700 0.358652723 0.358840458 0.413003726  
0.734673252 0.796721224 0.770913112 0.856589465 0.802723188 0.788595240 0.832036001  
0.492301693 0.502818159 0.482562013 0.588112098 0.600788737 0.618672842 0.555446589  
0.768264255 0.730058658 0.737091176 0.681868711 0.749488313 0.756059853 0.838264231  
0.529210321 0.654116174 0.625728672 0.645274292 0.683886549 0.601969317 0.607060503  
0.546544836 0.506143818 0.439413035 0.608854373 0.613870018 0.630588249 0.618915812  
0.297781433 0.303237723 0.331266447 0.353839153 0.327414080 0.312379890 0.380961676  
0.778059179 0.806578822 0.707235956 0.842235585 0.744032732 0.821518260 0.847760917  
0.795684262 0.684747092 0.678226710 0.633559070 0.652395471 0.772438360 0.784202785  
0.930200365 0.890537982 0.914440223 0.694615925 0.896434738 0.945470616 0.929150141  
0.492161267 0.508843448 0.478414260 0.511610088 0.529920847 0.509863161 0.500485123  
0.641105980 0.692574284 0.659252644 0.705649963 0.676209115 0.676155298 0.692648032  
0.655444383 0.643876551 0.658194422 0.613659565 0.724233904 0.621386532 0.700272359  
0.485561642 0.492871638 0.539292769 0.574615184 0.636829551 0.547157259 0.555014495  
0.288094342 0.328902425 0.297265101 0.313571191 0.250116010 0.201463297 0.366940649  
0.673517516 0.673855493 0.586920584 0.592082277 0.604428852 0.641599828 0.689155892  
0.821971995 0.788309172 0.760915746 0.715444036 0.795363643 0.765393668 0.818121597  
0.813133682 0.693345357 0.582105090 0.745053320 0.752816195 0.798572011 0.768050994  
0.438878769 0.378369432 0.307861990 0.479438150 0.368828086 0.335077280 0.533285384  
0.385791462 0.372708115 0.377250955 0.472622177 0.500947596 0.556184502 0.444647435  
0.542052213 0.571732309 0.512517776 0.535147897 0.550231136 0.518883225 0.671448142  
0.645775350 0.562981426 0.474393541 0.659094088 0.701047345 0.720463775 0.682918214  
0.541306875 0.239843392 0.411584811 0.457466995 0.440403476 0.417674517 0.499658227  
0.374736263 0.273106737 0.350971655 0.324564475 0.365907699 0.413394868 0.391942513  
0.980388962 0.963121517 0.975514939 0.974706019 0.974587851 0.976914319 0.965958048  
0.961044362 0.941991311 0.949960333 0.944598201 0.953136955 0.943509195 0.952570998  
0.043528723 0.037082531 0.032470884 0.031421371 0.025969677 0.032557166 0.034871711  
0.961169808 0.955680246 0.965250535 0.956774447 0.968283290 0.967209163 0.936891048  
0.959121648 0.889433977 0.926141545 0.903226291 0.935750321 0.947810996 0.929787224  
0.926851808 0.873541112 0.804321213 0.803247652 0.813564898 0.838959906 0.694326976  
0.660064219 0.662444865 0.716598860 0.741711120 0.783702185 0.709938757 0.680094536

| DA3         | DA4         | DA5         | DA6         | DA7         | DA8         | DA9         |
|-------------|-------------|-------------|-------------|-------------|-------------|-------------|
| 0.032721204 | 0.023170242 | 0.025016019 | 0.026659339 | 0.026400674 | 0.025288646 | 0.029205357 |
| 0.024859824 | 0.029959423 | 0.019109808 | 0.026793531 | 0.019535416 | 0.022659096 | 0.027179256 |
| 0.030850476 | 0.031687567 | 0.018229861 | 0.026357624 | 0.023179811 | 0.033002751 | 0.028934922 |
| 0.030975450 | 0.024125942 | 0.020992963 | 0.022402812 | 0.024523293 | 0.029456727 | 0.025758738 |
| 0.024116715 | 0.028766974 | 0.019013871 | 0.021990307 | 0.017457640 | 0.019886793 | 0.022540231 |
| 0.024558625 | 0.027567997 | 0.022930363 | 0.030413727 | 0.029536014 | 0.028065472 | 0.040887822 |
| 0.033671078 | 0.027814271 | 0.029472362 | 0.032862431 | 0.030702938 | 0.032152931 | 0.033316663 |
| 0.024098296 | 0.033891294 | 0.024745837 | 0.033286080 | 0.024828849 | 0.024541467 | 0.024753340 |
| 0.034317088 | 0.043050791 | 0.029455136 | 0.025281331 | 0.025931063 | 0.035563211 | 0.033603924 |
| 0.026813103 | 0.032432151 | 0.025196872 | 0.026602777 | 0.019945674 | 0.031866246 | 0.032979304 |
| 0.033620013 | 0.031385342 | 0.019817599 | 0.037307488 | 0.032002894 | 0.030981602 | 0.028110044 |
| 0.048190627 | 0.051963768 | 0.034571817 | 0.041324920 | 0.047727838 | 0.051608150 | 0.038025924 |
| 0.030246590 | 0.035400315 | 0.017752445 | 0.026173590 | 0.027250371 | 0.026763629 | 0.028069152 |
| 0.045989948 | 0.036036969 | 0.032065644 | 0.035251944 | 0.037531808 | 0.041838588 | 0.036022523 |
| 0.041069724 | 0.040559758 | 0.027928020 | 0.036565939 | 0.026860788 | 0.031003777 | 0.029243994 |
| 0.042122872 | 0.035716792 | 0.032613405 | 0.026764484 | 0.031619848 | 0.048297395 | 0.031908097 |
| 0.042054229 | 0.036319167 | 0.027177409 | 0.047110208 | 0.030530792 | 0.044602714 | 0.046037269 |
| 0.057478067 | 0.035538837 | 0.029462820 | 0.050351567 | 0.039333258 | 0.044451770 | 0.038242865 |
| 0.040008684 | 0.048388441 | 0.026408499 | 0.046425755 | 0.038738631 | 0.056900596 | 0.051435250 |
| 0.039814934 | 0.046306502 | 0.026404120 | 0.034527689 | 0.031060093 | 0.031513166 | 0.034318554 |
| 0.052444139 | 0.051968942 | 0.046587730 | 0.059831109 | 0.046670015 | 0.052025101 | 0.058593919 |
| 0.058938342 | 0.045066623 | 0.038486314 | 0.039483478 | 0.029156262 | 0.046884072 | 0.066378611 |
| 0.049186103 | 0.055688303 | 0.038633512 | 0.046363037 | 0.046391859 | 0.049417432 | 0.066988077 |
| 0.047051796 | 0.041379857 | 0.040506324 | 0.038319282 | 0.035319491 | 0.041420303 | 0.025244717 |
| 0.046258418 | 0.044854298 | 0.037741052 | 0.022413197 | 0.031557746 | 0.040038868 | 0.028863331 |
| 0.051894223 | 0.062692046 | 0.045943980 | 0.036061149 | 0.032116898 | 0.043162679 | 0.049851251 |
| 0.072618862 | 0.070456671 | 0.047813465 | 0.047542374 | 0.043319406 | 0.059532409 | 0.055552128 |
| 0.068235789 | 0.059395762 | 0.050438723 | 0.055103685 | 0.069400183 | 0.075951599 | 0.055037593 |
| 0.059083956 | 0.075635716 | 0.051692361 | 0.056325649 | 0.046658535 | 0.047058527 | 0.055588629 |
| 0.055727724 | 0.057079702 | 0.031911774 | 0.047249149 | 0.044172030 | 0.053305891 | 0.065881363 |
| 0.078063631 | 0.085647123 | 0.054144080 | 0.078125643 | 0.070216210 | 0.075565724 | 0.089711770 |
| 0.081471644 | 0.066825756 | 0.084069993 | 0.072954946 | 0.068212880 | 0.061636073 | 0.075810276 |
| 0.063803524 | 0.047590421 | 0.035749430 | 0.041904539 | 0.035463911 | 0.046377260 | 0.050442298 |
| 0.048893280 | 0.066115618 | 0.046683305 | 0.066520708 | 0.041367256 | 0.058230505 | 0.057101906 |
| 0.080705909 | 0.088412269 | 0.094764274 | 0.076172844 | 0.069179227 | 0.080738857 | 0.084153045 |
| 0.059529565 | 0.069661161 | 0.053074945 | 0.043356468 | 0.039287749 | 0.039988304 | 0.073268427 |
| 0.097372119 | 0.063694050 | 0.040530713 | 0.061661715 | 0.045195772 | 0.059435925 | 0.066253473 |
| 0.937921310 | 0.921142388 | 0.911693769 | 0.915724492 | 0.925081687 | 0.933938607 | 0.936661129 |
| 0.081262900 | 0.078242447 | 0.082341081 | 0.050055293 | 0.053910735 | 0.059544336 | 0.059730146 |
| 0.917438643 | 0.890721532 | 0.912812496 | 0.918336081 | 0.906106706 | 0.928548384 | 0.934281532 |

0.071783355 0.102119772 0.064120856 0.057983574 0.052556099 0.073832244 0.069620020  
0.926307532 0.878913348 0.910975160 0.923792629 0.935319024 0.932386996 0.941887389  
0.905867527 0.875859623 0.873511892 0.901141629 0.899351125 0.921934516 0.932671135  
0.068606106 0.071635456 0.068716297 0.122936141 0.090957820 0.064393938 0.099250449  
0.066970519 0.079227551 0.020274041 0.061610766 0.037704596 0.055219780 0.070187072  
0.099941678 0.114155662 0.081290146 0.079962078 0.084817904 0.097213760 0.102669203  
0.094845364 0.090982194 0.073084654 0.078187944 0.073621811 0.077810109 0.095622298  
0.945931784 0.921698928 0.893402246 0.931375956 0.907304480 0.929960959 0.936153899  
0.103986700 0.114789373 0.083086909 0.074071320 0.079372864 0.075765814 0.070044440  
0.902426399 0.877824735 0.901608720 0.906337023 0.911924111 0.915148801 0.926859081  
0.090096149 0.070930440 0.081436701 0.086134299 0.066222330 0.104797124 0.140312114  
0.073761751 0.085643870 0.063645547 0.063447623 0.054458471 0.067224447 0.088000877  
0.891318473 0.887043474 0.889888740 0.872071117 0.900350469 0.918065720 0.913489758  
0.139165504 0.171963438 0.139599097 0.146182691 0.133940032 0.151640379 0.159487511  
0.929491451 0.895639750 0.885747576 0.918172662 0.908465255 0.903826206 0.917520806  
0.918662684 0.896212253 0.872620472 0.901725204 0.899405088 0.906601201 0.918117239  
0.880050707 0.855761478 0.855055577 0.879760164 0.871726512 0.890422765 0.901006645  
0.094636193 0.098854518 0.078690785 0.092578809 0.074498566 0.096309655 0.087373316  
0.898805127 0.871138190 0.841167255 0.911688701 0.873116915 0.916613444 0.928026832  
0.861074310 0.872217216 0.864400575 0.887961195 0.850824995 0.890233804 0.914085254  
0.885514754 0.860204558 0.838552586 0.883803600 0.884638935 0.904431827 0.896851389  
0.191290525 0.188222443 0.169877094 0.162543106 0.155039827 0.197045011 0.215552633  
0.919776409 0.877257778 0.894312960 0.903948437 0.894574591 0.914743254 0.930379214  
0.844439503 0.829625875 0.826550633 0.812823216 0.813629541 0.815261984 0.814945736  
0.899297179 0.849587061 0.872914015 0.879891546 0.880018674 0.864668465 0.908614541  
0.138299244 0.187759928 0.132726833 0.146968903 0.125293695 0.151791014 0.184802806  
0.111211717 0.103329323 0.073843271 0.155448940 0.078812482 0.076199965 0.124454798  
0.142353560 0.164998017 0.120841129 0.159000450 0.144241613 0.130485976 0.167661753  
0.133530837 0.051701543 0.042289792 0.106307113 0.062913926 0.087891540 0.114686577  
0.169255658 0.064685078 0.038857315 0.102003942 0.060310254 0.068743739 0.084265285  
0.914033365 0.868429395 0.905653516 0.872922393 0.898739773 0.868454377 0.903118484  
0.851830735 0.836243732 0.798819358 0.864399389 0.814562239 0.843405449 0.871207339  
0.925705591 0.839438708 0.828815413 0.888229438 0.869307113 0.936674395 0.903425483  
0.909636607 0.819339625 0.826995889 0.854849826 0.817024306 0.852994662 0.908062945  
0.116673298 0.191703022 0.204776123 0.195865664 0.161808595 0.143944975 0.203583071  
0.910663432 0.817127502 0.840328987 0.875784164 0.873536373 0.898606313 0.928440370  
0.181020481 0.159148405 0.132981958 0.144920515 0.149128335 0.218676499 0.229314377  
0.850684700 0.836998065 0.808970510 0.867588178 0.822489937 0.870980152 0.870548792  
0.917379155 0.857853926 0.837943804 0.869255504 0.845359113 0.860718330 0.892760634  
0.455787662 0.408836177 0.375581444 0.396528978 0.365873672 0.434803526 0.427988510  
0.140006408 0.163833935 0.194076836 0.149700850 0.180314500 0.190984829 0.136887485

0.910095378 0.827504401 0.826938795 0.829633066 0.836037683 0.845834569 0.865457990  
0.802037250 0.789406818 0.756131273 0.761344541 0.763257252 0.838378192 0.836702918  
0.841884066 0.841270734 0.850935928 0.845007459 0.851892664 0.827456541 0.885154836  
0.863604100 0.846776136 0.822047402 0.826357430 0.843527218 0.859517149 0.883110589  
0.860446835 0.776274031 0.788327927 0.872144267 0.864019723 0.874715531 0.904227994  
0.801834620 0.867451347 0.796110931 0.821999174 0.824253481 0.870392051 0.848958572  
0.790136515 0.705675072 0.709214655 0.732187843 0.734715526 0.746166606 0.771058403  
0.207243473 0.292449219 0.242226230 0.231295958 0.207181466 0.224911049 0.240196356  
0.347738595 0.375407564 0.332315981 0.373032092 0.312563203 0.350028913 0.426227700  
0.665111296 0.637397377 0.559468031 0.664728952 0.596975204 0.686041801 0.665713566  
0.843022543 0.824476156 0.813924497 0.826984628 0.799155758 0.835110909 0.905362985  
0.593023618 0.615525866 0.593900896 0.568424024 0.547678847 0.573356778 0.620282204  
0.738096222 0.668411404 0.655616852 0.783597001 0.701303465 0.690441309 0.750107189  
0.414172823 0.446885745 0.426677848 0.391857327 0.421491507 0.469256600 0.495442976  
0.677840435 0.631767894 0.630841847 0.623106057 0.666522431 0.681361604 0.707460664  
0.467126523 0.456711429 0.402867039 0.460032866 0.416996494 0.451516101 0.498151873  
0.231676781 0.075964595 0.080519766 0.100101074 0.082502889 0.126017082 0.112227701  
0.889129250 0.810244267 0.763476169 0.846455123 0.831100345 0.743263164 0.836263220  
0.288636161 0.301058671 0.297223250 0.290980001 0.277672558 0.306744161 0.312959609  
0.468263573 0.472695418 0.420097356 0.492407509 0.442265145 0.496762771 0.462873761  
0.868425967 0.838092921 0.794715384 0.868332983 0.867488260 0.891276177 0.914403600  
0.584824798 0.591284870 0.551013300 0.573633595 0.526901897 0.545582348 0.607500526  
0.320547329 0.387378410 0.334817626 0.375843057 0.330298396 0.341380901 0.405264851  
0.582375350 0.555907219 0.537048110 0.581143787 0.526693265 0.588828267 0.559357071  
0.910662296 0.774810111 0.834422396 0.885197513 0.856593152 0.884914387 0.905319214  
0.332520578 0.358182858 0.392094078 0.388696245 0.322544133 0.403347429 0.436695534  
0.345759241 0.384666673 0.365940435 0.334633267 0.325622042 0.341320298 0.407834084  
0.712041907 0.657247947 0.669149196 0.790216269 0.703545984 0.735336398 0.776616092  
0.686003543 0.634061761 0.624695562 0.743693840 0.691999394 0.778986907 0.739533167  
0.870986405 0.809212549 0.781980236 0.802665841 0.805058842 0.815674793 0.854732041  
0.816965566 0.765739622 0.722724215 0.783100496 0.787624728 0.790345148 0.814096770  
0.420107488 0.461285983 0.368995210 0.497930724 0.469724639 0.484120242 0.502460916  
0.776171379 0.837484951 0.751104940 0.800130405 0.749637021 0.801656510 0.772421350  
0.166305598 0.231892017 0.236091403 0.281519511 0.189855430 0.222089862 0.240697385  
0.617025366 0.651347970 0.615429637 0.605952322 0.634533890 0.651086885 0.682406096  
0.803741313 0.765063669 0.728902514 0.820585679 0.760433315 0.797062068 0.857112706  
0.400965708 0.464027630 0.455849756 0.547546988 0.471314804 0.421055851 0.488607440  
0.483039841 0.462575189 0.466793541 0.467488105 0.443888944 0.503856812 0.572052508  
0.765553598 0.731447105 0.732181498 0.845318596 0.754824294 0.792096819 0.798742069  
0.873355763 0.717887395 0.755806665 0.814438279 0.820787045 0.799741312 0.830088735  
0.616250451 0.487667044 0.425278131 0.536583756 0.528645607 0.597227409 0.530714715



0.655268118 0.628557632 0.543305906 0.651881002 0.603635780 0.652157856 0.648807671  
0.446131010 0.493130968 0.420143331 0.537171096 0.483553989 0.567915287 0.572105683  
0.339488338 0.084398173 0.068704549 0.127065187 0.126965040 0.126987692 0.137661944  
0.277860956 0.092294325 0.072935979 0.181613553 0.129140109 0.154874656 0.224304531  
0.533556306 0.443635358 0.424017769 0.497695002 0.403862974 0.529914628 0.558152265  
0.545078424 0.544601614 0.560696049 0.602042781 0.522404118 0.613175264 0.588630379  
0.198095745 0.220917967 0.249724711 0.270100849 0.175105830 0.192663005 0.308074416  
0.862243786 0.783898520 0.753224464 0.876879458 0.839004978 0.827272172 0.854615308  
0.439809140 0.377691134 0.397772844 0.429086943 0.440254190 0.395119768 0.420780323  
0.887331466 0.818111825 0.804215059 0.828442806 0.794708655 0.848311494 0.861622384  
0.529442474 0.537049087 0.534844868 0.664090477 0.626671818 0.585794959 0.679896856  
0.841485020 0.761110070 0.762835980 0.775031124 0.755583564 0.773772811 0.790598361  
0.679190542 0.660832930 0.629755916 0.713897453 0.682880017 0.750550460 0.711093120  
0.585918509 0.628730089 0.578421287 0.638500774 0.595420488 0.666727291 0.659827370  
0.284185498 0.349772643 0.333356212 0.463139307 0.431018324 0.436854596 0.367142242  
0.826471925 0.703792223 0.710715694 0.860632825 0.779222094 0.905588206 0.880079133  
0.774468715 0.715850877 0.595846781 0.682846616 0.681909884 0.780962618 0.800147901  
0.935125310 0.859520577 0.945924829 0.951883705 0.940577213 0.919992350 0.927988088  
0.555337514 0.546240088 0.500336854 0.609547785 0.564116384 0.598580728 0.627314990  
0.764145700 0.696909988 0.622110247 0.820975182 0.730594060 0.738795409 0.785215646  
0.731002336 0.590907424 0.643181654 0.732245900 0.770139058 0.708771444 0.793887908  
0.567658342 0.547540698 0.607731034 0.573401224 0.592226444 0.634078227 0.639253827  
0.393067345 0.391234650 0.293499224 0.389278670 0.355754406 0.384429601 0.356935958  
0.752892088 0.575915990 0.625318218 0.669718398 0.621530900 0.766867535 0.766890057  
0.904914052 0.719962907 0.744706110 0.899096368 0.835923391 0.877945480 0.898062742  
0.795043136 0.855941832 0.764498188 0.865180409 0.792052761 0.860663923 0.837459508  
0.531461850 0.418780558 0.365838546 0.467836584 0.437746435 0.504880819 0.504745907  
0.445451463 0.603651477 0.520005828 0.508473456 0.493174743 0.495963642 0.572493144  
0.736163314 0.518817836 0.475987424 0.565474997 0.591608451 0.601928630 0.642691842  
0.661948267 0.771334842 0.716989575 0.725499717 0.698568923 0.712892586 0.768021326  
0.496472448 0.462599323 0.411532703 0.498745462 0.470789995 0.591892830 0.537851625  
0.455479794 0.570126312 0.410873178 0.501830705 0.384857785 0.580857279 0.340273220  
0.970079201 0.961402938 0.962747086 0.965032243 0.971858252 0.974325767 0.966609414  
0.938983711 0.944320263 0.934369032 0.925326366 0.937224572 0.952867232 0.944357027  
0.027235115 0.038002954 0.038549070 0.026963313 0.024513568 0.027603383 0.028698189  
0.955899377 0.945541177 0.934626155 0.966411940 0.964653804 0.958505460 0.946504539  
0.819037221 0.921408089 0.930453353 0.819289667 0.904157348 0.901877415 0.886891547  
0.869662103 0.741736779 0.768838332 0.677469258 0.824428682 0.786408504 0.831143805  
0.579380554 0.727045421 0.808842161 0.585065582 0.763550756 0.535554458 0.610571390

| DA10        | mean.CONT   | mean.DA     | mean.diff    | mean.quot.lo | max.CONT    | min.CONT    |
|-------------|-------------|-------------|--------------|--------------|-------------|-------------|
| 0.030465860 | 0.022544353 | 0.026837337 | -0.004292984 | -0.178761573 | 0.025837752 | 0.016656580 |
| 0.026522290 | 0.019696690 | 0.024188300 | -0.004491610 | -0.203200561 | 0.022948674 | 0.015667878 |
| 0.028097750 | 0.022397561 | 0.027109236 | -0.004711675 | -0.195893109 | 0.027968080 | 0.018997640 |
| 0.025014934 | 0.019202703 | 0.024016866 | -0.004814163 | -0.220148327 | 0.023937871 | 0.015456373 |
| 0.020956436 | 0.017320894 | 0.022246506 | -0.004925612 | -0.239138169 | 0.019823577 | 0.014612273 |
| 0.031819291 | 0.023328684 | 0.028468711 | -0.005140027 | -0.206921151 | 0.027172182 | 0.016823852 |
| 0.024625791 | 0.025622809 | 0.030793831 | -0.005171022 | -0.195549729 | 0.032106200 | 0.019244574 |
| 0.025318965 | 0.021435567 | 0.026923600 | -0.005488032 | -0.232145416 | 0.030334216 | 0.014367370 |
| 0.024952042 | 0.024733937 | 0.030504451 | -0.005770513 | -0.221734497 | 0.031804188 | 0.018227038 |
| 0.023320366 | 0.021687535 | 0.027828576 | -0.006141040 | -0.255561029 | 0.027513338 | 0.018275248 |
| 0.038749421 | 0.025193116 | 0.031360601 | -0.006167484 | -0.232963871 | 0.033705024 | 0.020940725 |
| 0.048064997 | 0.037738458 | 0.044305005 | -0.006566546 | -0.185933199 | 0.044941548 | 0.029605287 |
| 0.032164952 | 0.022185790 | 0.028882948 | -0.006697158 | -0.272713728 | 0.025288430 | 0.018253191 |
| 0.048036164 | 0.030980676 | 0.037749774 | -0.006769098 | -0.220550143 | 0.038313797 | 0.024655584 |
| 0.036171827 | 0.024263898 | 0.031458211 | -0.007194313 | -0.274968607 | 0.036048486 | 0.018901803 |
| 0.041815375 | 0.028490629 | 0.035945680 | -0.007455051 | -0.255421977 | 0.041527825 | 0.020897375 |
| 0.036859278 | 0.029759387 | 0.037480105 | -0.007720717 | -0.256027607 | 0.032311717 | 0.026506560 |
| 0.034705072 | 0.032264631 | 0.040588613 | -0.008323981 | -0.259361810 | 0.039077059 | 0.024426143 |
| 0.048033727 | 0.034773988 | 0.043172194 | -0.008398205 | -0.248011160 | 0.046904734 | 0.022082291 |
| 0.031169471 | 0.027205600 | 0.035772957 | -0.008567356 | -0.298975701 | 0.031823348 | 0.021477580 |
| 0.046682993 | 0.040795005 | 0.050027093 | -0.009232087 | -0.240927161 | 0.047886752 | 0.034345668 |
| 0.054357884 | 0.036563977 | 0.045826106 | -0.009262129 | -0.261725643 | 0.047204789 | 0.024633963 |
| 0.062537336 | 0.042071591 | 0.051382105 | -0.009310513 | -0.237321629 | 0.052848165 | 0.033056443 |
| 0.047012763 | 0.029472070 | 0.038899753 | -0.009427683 | -0.308995011 | 0.040974484 | 0.024107696 |
| 0.036564268 | 0.026362050 | 0.035955722 | -0.009593672 | -0.337810973 | 0.032129696 | 0.021097640 |
| 0.056983417 | 0.037307589 | 0.047058789 | -0.009751199 | -0.270377487 | 0.043281261 | 0.027582861 |
| 0.059221291 | 0.046866328 | 0.056896640 | -0.010030311 | -0.234359093 | 0.054498851 | 0.037359158 |
| 0.059920474 | 0.052262544 | 0.062324196 | -0.010061652 | -0.216113861 | 0.059111402 | 0.043184300 |
| 0.056163438 | 0.045532810 | 0.055867695 | -0.010334885 | -0.246230670 | 0.052819374 | 0.040163661 |
| 0.043812995 | 0.036827296 | 0.047811490 | -0.010984193 | -0.304006513 | 0.049519360 | 0.026319439 |
| 0.077671793 | 0.062668021 | 0.073748359 | -0.011080337 | -0.204740303 | 0.074168461 | 0.055174369 |
| 0.087417557 | 0.064014563 | 0.075121460 | -0.011106896 | -0.201713727 | 0.073701581 | 0.055087265 |
| 0.042482636 | 0.033847177 | 0.045271077 | -0.011423899 | -0.334040753 | 0.039851622 | 0.026746577 |
| 0.056667152 | 0.039743213 | 0.051377176 | -0.011633962 | -0.303202568 | 0.053533004 | 0.028535794 |
| 0.084382970 | 0.072842810 | 0.084498738 | -0.011655928 | -0.189918585 | 0.086644724 | 0.063326458 |
| 0.047029292 | 0.037518595 | 0.050224522 | -0.012705927 | -0.341858856 | 0.050828929 | 0.025608876 |
| 0.057709082 | 0.044384344 | 0.057773041 | -0.013388697 | -0.317520120 | 0.082712582 | 0.026537115 |
| 0.929359283 | 0.911043965 | 0.924708220 | -0.013664254 | -0.021246057 | 0.933816348 | 0.881950281 |
| 0.062622610 | 0.050321063 | 0.064576303 | -0.014255240 | -0.306055429 | 0.060466724 | 0.040000226 |
| 0.929273588 | 0.900435710 | 0.916174789 | -0.015739078 | -0.024727340 | 0.926349456 | 0.876580530 |

0.130754421 0.059917722 0.075746914 -0.015829191 -0.294426566 0.071996956 0.049764854  
0.929504218 0.904674099 0.920884794 -0.016210694 -0.025344837 0.933810578 0.892435149  
0.920209702 0.886714815 0.903422266 -0.016707450 -0.026632724 0.909260607 0.871080187  
0.071429207 0.062246085 0.079115546 -0.016869460 -0.302757708 0.082453475 0.050713772  
0.039722327 0.034089082 0.050968867 -0.016879785 -0.467651305 0.054009175 0.020810074  
0.105424986 0.078034398 0.095269209 -0.017234810 -0.257944257 0.089613314 0.061658678  
0.111718307 0.064974391 0.082296725 -0.017322333 -0.299881547 0.083130668 0.050550761  
0.943336926 0.910238230 0.927630210 -0.017391979 -0.027011660 0.935399197 0.875613162  
0.093426485 0.070775702 0.089061367 -0.018285665 -0.294401140 0.083386174 0.032137618  
0.927093231 0.890318029 0.908947699 -0.018629670 -0.029548044 0.919750985 0.868110155  
0.081301591 0.068013571 0.087077045 -0.019063473 -0.315405075 0.081392619 0.053140238  
0.068865972 0.052483260 0.071610023 -0.019126763 -0.385276633 0.068988232 0.041395606  
0.923430588 0.880757048 0.900290471 -0.019533423 -0.031294985 0.914206137 0.853034462  
0.170060522 0.128689180 0.148255454 -0.019566274 -0.190399985 0.152014371 0.117485519  
0.928948621 0.890617489 0.910324703 -0.019707214 -0.031228460 0.906495777 0.870045367  
0.924758985 0.886008322 0.905771787 -0.019763465 -0.031475987 0.906434466 0.855574981  
0.884929926 0.857019583 0.877070803 -0.020051220 -0.032984687 0.873646410 0.835559688  
0.088344226 0.065209630 0.085725207 -0.020515576 -0.347981477 0.083291261 0.043929448  
0.908575089 0.872971764 0.893809315 -0.020837550 -0.033651127 0.899440945 0.856171295  
0.913833925 0.858547373 0.881632815 -0.023085441 -0.037845177 0.878946143 0.820547489  
0.898427350 0.858465818 0.881827346 -0.023361527 -0.038295370 0.883742296 0.822467076  
0.168530540 0.151500137 0.174947488 -0.023447351 -0.195580318 0.194573228 0.125325128  
0.928711235 0.884886049 0.908378365 -0.023492316 -0.037384665 0.918057250 0.860742694  
0.863415647 0.801400055 0.825309088 -0.023909032 -0.041896733 0.835166757 0.761731170  
0.919977002 0.859584688 0.883833328 -0.024248639 -0.039679301 0.897939582 0.819048199  
0.190261716 0.128968570 0.153567457 -0.024598887 -0.235127117 0.149158561 0.106979147  
0.116934345 0.082063088 0.107068345 -0.025005257 -0.346656290 0.120195861 0.046357875  
0.153700340 0.119002043 0.144812332 -0.025810288 -0.263126480 0.159224947 0.084685600  
0.066159503 0.049474379 0.077108718 -0.027634338 -0.550548801 0.068942301 0.033486000  
0.076307641 0.048356512 0.076134160 -0.027777647 -0.561691841 0.068943331 0.029938492  
0.903851199 0.867444833 0.896001042 -0.028556208 -0.046204280 0.919868115 0.816908900  
0.867075375 0.814402684 0.843070684 -0.028667999 -0.049316083 0.858483832 0.772814643  
0.893856751 0.855786519 0.885357412 -0.029570892 -0.048452350 0.888981262 0.824396535  
0.870745725 0.828272995 0.858176282 -0.029903287 -0.050567850 0.856641008 0.789655413  
0.193262342 0.145317114 0.175274429 -0.029957315 -0.254446979 0.202593119 0.095758563  
0.855325787 0.838583248 0.869176617 -0.030593368 -0.051096817 0.866417233 0.791796398  
0.184883327 0.141141376 0.172072353 -0.030930970 -0.268613207 0.208384635 0.084042415  
0.883882644 0.816527339 0.847737917 -0.031210578 -0.053474357 0.845354254 0.771317583  
0.861655857 0.833131408 0.864411934 -0.031280525 -0.052555580 0.879518480 0.780872201  
0.424655633 0.375468413 0.407119503 -0.031651090 -0.113848125 0.414830197 0.337740987  
0.159788896 0.125989502 0.157755626 -0.031766123 -0.302865863 0.141841504 0.096217527

0.891308719 0.828284058 0.860059877 -0.031775815 -0.053675497 0.862832786 0.796538954  
0.803912064 0.761720954 0.793571126 -0.031850172 -0.058346448 0.804434982 0.693024476  
0.890099782 0.819558714 0.851634690 -0.032075976 -0.054732240 0.856736204 0.766312602  
0.890228171 0.824272686 0.857008870 -0.032736184 -0.055527741 0.873817217 0.796798646  
0.841927217 0.807574492 0.841347450 -0.033772957 -0.058397855 0.836528606 0.750335983  
0.824612958 0.795420518 0.829589417 -0.034168895 -0.059941757 0.828605746 0.748278699  
0.762706611 0.707007308 0.741526211 -0.034518903 -0.067835598 0.734036070 0.665894984  
0.239130865 0.196042382 0.230774014 -0.034731631 -0.224738565 0.226530677 0.161150247  
0.426291717 0.327767295 0.362605158 -0.034837863 -0.141618003 0.355475346 0.295286014  
0.650142733 0.600502200 0.636470575 -0.035968375 -0.082588212 0.649172609 0.572062282  
0.831874461 0.797710986 0.834328860 -0.036617874 -0.063965866 0.841549204 0.736289393  
0.643191575 0.560241715 0.597744519 -0.037502803 -0.091891395 0.601098735 0.495896441  
0.717358364 0.672322298 0.710270372 -0.037948074 -0.078085197 0.713439857 0.641158982  
0.493926190 0.395656237 0.433982516 -0.038326278 -0.130245192 0.440639671 0.362541450  
0.718487046 0.624537370 0.664595503 -0.040058132 -0.088317568 0.707357646 0.558720929  
0.485287527 0.404217130 0.444587316 -0.040370186 -0.134170213 0.436654471 0.365245378  
0.098485768 0.068675229 0.109189179 -0.040513945 -0.599271873 0.110956978 0.044318973  
0.835593152 0.778391337 0.819303892 -0.040912554 -0.072988938 0.824446470 0.705541756  
0.322450001 0.252631391 0.293830876 -0.041199485 -0.210229122 0.314069061 0.214080766  
0.455915400 0.417876921 0.459206254 -0.041329333 -0.133026381 0.467097474 0.342768552  
0.911979747 0.826004576 0.867549225 -0.041544648 -0.069969214 0.858473965 0.790309117  
0.615472777 0.532787890 0.574410955 -0.041623065 -0.106594690 0.592288408 0.495212858  
0.361540978 0.309977046 0.351814919 -0.041837872 -0.177283481 0.335811537 0.294533699  
0.587744761 0.521736258 0.564443866 -0.042707608 -0.111455077 0.566876462 0.486414315  
0.871223185 0.821478591 0.864309594 -0.042831002 -0.072465112 0.870557819 0.785183161  
0.366106650 0.335255492 0.378131851 -0.042876355 -0.168882464 0.393168761 0.280579297  
0.386388789 0.314942344 0.358156141 -0.043213797 -0.180134012 0.345774399 0.293063046  
0.796023708 0.685446197 0.729425702 -0.043979504 -0.088466285 0.750298275 0.619773962  
0.775326713 0.668919336 0.713506921 -0.044587585 -0.091766643 0.717375039 0.613789030  
0.822948589 0.769953249 0.815176854 -0.045223605 -0.081315705 0.831022022 0.709764868  
0.801327621 0.737238331 0.782471900 -0.045233568 -0.084791316 0.784492670 0.690173396  
0.491302031 0.409248651 0.455204179 -0.045955528 -0.150057915 0.491775795 0.358145433  
0.831829159 0.734324620 0.780288585 -0.045963965 -0.086447613 0.805444070 0.687182916  
0.254594298 0.181388360 0.227470152 -0.046081792 -0.311243102 0.241062689 0.129569450  
0.682183652 0.589639709 0.635972671 -0.046332962 -0.107377206 0.662860846 0.539848708  
0.783807217 0.734485006 0.781547370 -0.047062363 -0.088432897 0.770800045 0.699015182  
0.497569312 0.423747192 0.471118410 -0.047371218 -0.149537588 0.507219889 0.358194380  
0.539658232 0.438478660 0.486694269 -0.048215608 -0.147318760 0.500233280 0.371820906  
0.809225367 0.726656965 0.775907514 -0.049250548 -0.093366580 0.785230474 0.683879713  
0.783809467 0.745433999 0.795155749 -0.049721745 -0.091962165 0.815161654 0.646964121  
0.514381192 0.473815055 0.523698067 -0.049883011 -0.141568122 0.552455084 0.411593326

0.632560261 0.578759655 0.629103121 -0.050343466 -0.118369915 0.674483593 0.529257196  
0.526972788 0.459184355 0.509601945 -0.050417589 -0.147251921 0.507969031 0.414857177  
0.138633177 0.084201386 0.134641521 -0.050440134 -0.618661557 0.149111290 0.046114886  
0.147032735 0.096621229 0.147208767 -0.050587537 -0.560186952 0.151336228 0.063856584  
0.571005453 0.438857287 0.489516968 -0.050659680 -0.154276867 0.478300915 0.364367324  
0.583440644 0.519304878 0.570716304 -0.051411426 -0.133734590 0.583111489 0.484234553  
0.188183548 0.167920582 0.219531790 -0.051611207 -0.367460564 0.202328973 0.122809505  
0.784111505 0.764698443 0.818219479 -0.053521036 -0.096378294 0.822594584 0.731057063  
0.364650638 0.349718216 0.403700916 -0.053982700 -0.201720934 0.405665700 0.296782676  
0.881335987 0.780314342 0.834471092 -0.054156749 -0.095621447 0.856589465 0.720330825  
0.626176988 0.541545562 0.595808696 -0.054263135 -0.135382217 0.600788737 0.482562013  
0.802392162 0.730370889 0.785713317 -0.055342428 -0.104000574 0.796005660 0.681868711  
0.729216995 0.620089801 0.676644725 -0.056554924 -0.124006374 0.683886549 0.529210321  
0.680165438 0.571723572 0.628321531 -0.056597958 -0.133949545 0.635955515 0.439413035  
0.364486168 0.315509739 0.372329656 -0.056819917 -0.232116401 0.356354924 0.268608594  
0.837535864 0.759748260 0.817331714 -0.057583454 -0.104079184 0.842235585 0.707235956  
0.727157616 0.673330721 0.731583215 -0.058252494 -0.118024607 0.795684262 0.568261354  
0.822935962 0.859333741 0.917856879 -0.058523138 -0.093992148 0.930200365 0.694615925  
0.586419355 0.500848420 0.559824198 -0.058975777 -0.157621612 0.529920847 0.463730553  
0.752489654 0.668493793 0.728003922 -0.059510128 -0.121292864 0.705649963 0.619246823  
0.746065076 0.642788926 0.703785969 -0.060997042 -0.128874958 0.724233904 0.524682174  
0.642725546 0.527844477 0.590678710 -0.062834232 -0.159404466 0.636829551 0.442007598  
0.328222849 0.280560376 0.346082665 -0.065522289 -0.293374229 0.328902425 0.217510540  
0.686905343 0.610586321 0.679679425 -0.069093103 -0.152294030 0.673855493 0.552858509  
0.785606029 0.755518428 0.824973234 -0.069454806 -0.125292844 0.821971995 0.705489162  
0.818524647 0.742834737 0.815598741 -0.072764004 -0.133107573 0.813133682 0.582105090  
0.500822250 0.387000541 0.460047561 -0.073047020 -0.243665769 0.479438150 0.307861990  
0.557943603 0.444895797 0.519798929 -0.074903132 -0.219908823 0.554195709 0.372708115  
0.589069140 0.511796092 0.591207300 -0.079411208 -0.204376388 0.571732309 0.446593738  
0.773598321 0.640657314 0.723223555 -0.082566240 -0.172355223 0.720727591 0.474393541  
0.528204450 0.403751793 0.491542158 -0.087790364 -0.277605408 0.541306875 0.239843392  
0.361771366 0.342674924 0.441140702 -0.098465777 -0.355238450 0.423247068 0.263324512  
0.976619571 0.974833979 0.969154684 0.005679294 0.008343748 0.982017122 0.963121517  
0.952359663 0.951790431 0.942588806 0.009201625 0.013868977 0.964630721 0.941991311  
0.031174117 0.040330069 0.031016859 0.009313210 0.295203558 0.055113802 0.025969677  
0.960403354 0.963355146 0.953664602 0.009690543 0.014435181 0.969437737 0.955680246  
0.928077165 0.931389669 0.898879003 0.032510666 0.050703776 0.959121648 0.889433977  
0.806796559 0.837599375 0.783977090 0.053622285 0.094285144 0.926851808 0.795467768  
0.718206695 0.755712358 0.671825031 0.083887327 0.167400977 0.852797530 0.660064219

| sd.CONT     | max.DA      | min.DA      | sd.DA       | diffmeth.p.val (Welch's t-test) |
|-------------|-------------|-------------|-------------|---------------------------------|
| 0.002937134 | 0.032721204 | 0.023170242 | 0.003074015 | 0.015313100603716               |
| 0.002723130 | 0.029959423 | 0.019109808 | 0.003531077 | 0.0112295676436983              |
| 0.002906707 | 0.033002751 | 0.018229861 | 0.004586208 | 0.0276821059157054              |
| 0.002889343 | 0.030975450 | 0.017446755 | 0.004188510 | 0.0118247802159619              |
| 0.001823872 | 0.028910550 | 0.017457640 | 0.003984612 | 0.00348197718459                |
| 0.003098827 | 0.040887822 | 0.022930363 | 0.005266027 | 0.0212999097133083              |
| 0.004174229 | 0.033671078 | 0.024625791 | 0.002847848 | 0.0117649448000604              |
| 0.005554129 | 0.033891294 | 0.024098296 | 0.003697278 | 0.0143675609558583              |
| 0.004378147 | 0.043050791 | 0.024055207 | 0.006070443 | 0.0271160176986566              |
| 0.002847324 | 0.032979304 | 0.019945674 | 0.004262718 | 0.00313073373276736             |
| 0.003835419 | 0.038749421 | 0.019817599 | 0.005215426 | 0.0144416842966274              |
| 0.004820338 | 0.051963768 | 0.034571817 | 0.006039806 | 0.0329913480165571              |
| 0.002717449 | 0.035493348 | 0.017752445 | 0.005145137 | 0.00486504552906888             |
| 0.004698027 | 0.048036164 | 0.028014984 | 0.006062551 | 0.0184330340138221              |
| 0.005409267 | 0.041069724 | 0.019225630 | 0.007009369 | 0.0187474143578305              |
| 0.006393048 | 0.048297395 | 0.021633155 | 0.008704556 | 0.0447446541694946              |
| 0.001762386 | 0.047110208 | 0.027177409 | 0.007113096 | 0.00783775794044591             |
| 0.004881668 | 0.057478067 | 0.029462820 | 0.008447600 | 0.0168112423586213              |
| 0.008234692 | 0.056900596 | 0.026408499 | 0.008755472 | 0.0433809041362177              |
| 0.003277186 | 0.046306502 | 0.026404120 | 0.006249213 | 0.00198007364991104             |
| 0.005140444 | 0.059831109 | 0.042425462 | 0.005999809 | 0.00506114617254402             |
| 0.007399965 | 0.066378611 | 0.029156262 | 0.011184608 | 0.0459015454530176              |
| 0.006465264 | 0.066988077 | 0.038633512 | 0.008310208 | 0.0164538830600373              |
| 0.005774618 | 0.047051796 | 0.025244717 | 0.007531635 | 0.00732094155290743             |
| 0.004238021 | 0.046258418 | 0.022413197 | 0.007228665 | 0.0029065750127275              |
| 0.005629302 | 0.062692046 | 0.032116898 | 0.009055578 | 0.0148700021584226              |
| 0.005862903 | 0.072618862 | 0.043319406 | 0.011036014 | 0.0317818655685939              |
| 0.006002234 | 0.075951599 | 0.050438723 | 0.007914039 | 0.0140260082810358              |
| 0.003969459 | 0.075635716 | 0.046658535 | 0.008071997 | 0.0047212137837253              |
| 0.006650749 | 0.065881363 | 0.031911774 | 0.010172383 | 0.0117001233660369              |
| 0.006046559 | 0.089711770 | 0.054144080 | 0.010760466 | 0.0285192915704629              |
| 0.006332267 | 0.087417557 | 0.061636073 | 0.008450224 | 0.0152280831927608              |
| 0.004194382 | 0.063803524 | 0.035463911 | 0.008083424 | 0.00106323276640853             |
| 0.008428150 | 0.066520708 | 0.029892020 | 0.011674665 | 0.0241764809837784              |
| 0.008298351 | 0.094764274 | 0.069179227 | 0.008217328 | 0.0198643503321247              |
| 0.006953317 | 0.073268427 | 0.034541929 | 0.013294877 | 0.0123846624741132              |
| 0.016248424 | 0.097372119 | 0.040530713 | 0.016960392 | 0.0422106730464168              |
| 0.016055669 | 0.937921310 | 0.911693769 | 0.009412728 | 0.0448449936186108              |
| 0.006445932 | 0.082341081 | 0.047513717 | 0.012844042 | 0.00767879359319268             |
| 0.017799512 | 0.934281532 | 0.890721532 | 0.012725459 | 0.0480339832327335              |

0.007349279 0.130754421 0.052556099 0.023470528 0.0464482700200989  
0.013034267 0.941887389 0.878913348 0.017804891 0.0314484094430771  
0.010845712 0.932671135 0.873511892 0.020351239 0.0397590441951658  
0.010741747 0.122936141 0.057587577 0.019697050 0.021724602887619  
0.011946876 0.079227551 0.020274041 0.018506052 0.0251662704229684  
0.008205272 0.114155662 0.079962078 0.011121290 0.00407490154469958  
0.011756738 0.111718307 0.053902666 0.016201353 0.0159669136380321  
0.020326953 0.945931784 0.893402246 0.016268759 0.0392415532947315  
0.015850092 0.114789373 0.070044440 0.014754470 0.0254624775932606  
0.017948509 0.927093231 0.877824735 0.014694808 0.0282445804667189  
0.010638358 0.140312114 0.062849099 0.022375387 0.0203636774975198  
0.009843623 0.094662207 0.054458471 0.013680090 0.0017725775108131  
0.020447127 0.923430588 0.872071117 0.015828225 0.0371619310970204  
0.010400076 0.171963438 0.129375207 0.014715920 0.0148047113137349  
0.013626783 0.929491451 0.885747576 0.013941473 0.00874117854851126  
0.017632423 0.926835598 0.872620472 0.016798094 0.0219436954336862  
0.011458592 0.901006645 0.855055577 0.014277057 0.0122215637113872  
0.010456419 0.098854518 0.068579869 0.010324650 0.000977327810837946  
0.015329261 0.928026832 0.841167255 0.025828255 0.0362921683102653  
0.017286550 0.914085254 0.850824995 0.021981007 0.0230630190259586  
0.019801071 0.904431827 0.838552586 0.019716868 0.0187130261224002  
0.023550017 0.215552633 0.149560021 0.022053378 0.0409050096400192  
0.016065333 0.930379214 0.877257778 0.016545992 0.00728229148787424  
0.023804795 0.863415647 0.805077673 0.017487357 0.041366043959073  
0.025515341 0.919977002 0.849587061 0.021055202 0.0391898879003681  
0.016791283 0.190261716 0.125293695 0.025021827 0.0257385872598453  
0.022746440 0.155448940 0.073843271 0.025822123 0.0290035674222525  
0.025161273 0.167661753 0.107992368 0.019710858 0.0205343619910105  
0.010803645 0.133530837 0.042289792 0.031546619 0.0103143221611778  
0.012229537 0.169255658 0.038857315 0.037724152 0.0173786553550802  
0.036483605 0.925000176 0.868429395 0.019565268 0.0460520472398753  
0.028581833 0.871207339 0.798819358 0.023083745 0.0293755342731696  
0.020842541 0.936674395 0.828815413 0.034029986 0.0259426280901095  
0.023822071 0.909636607 0.817024306 0.032592544 0.0323733723549653  
0.032574691 0.204776123 0.116673298 0.029894407 0.0469168702341546  
0.024574012 0.928440370 0.817127502 0.037400549 0.0360085478937931  
0.032388050 0.229314377 0.132981958 0.033006884 0.0408599828457688  
0.025202272 0.883882644 0.808970510 0.025422141 0.015954770350122  
0.028465850 0.917379155 0.837943804 0.023929398 0.0217925034278365  
0.021446735 0.455787662 0.365873672 0.028413273 0.044290074208245  
0.014806248 0.194076836 0.119881482 0.024650738 0.00455716949207176

0.023992651 0.910095378 0.826938795 0.032791582 0.0261537464308866  
0.030759078 0.838378192 0.756131273 0.028741166 0.0360783722859076  
0.027109488 0.890099782 0.827456541 0.020234891 0.0110524982496344  
0.022446650 0.890228171 0.822047402 0.024252444 0.00965412804894876  
0.027520699 0.904227994 0.776274031 0.043887248 0.0386175039466262  
0.026657130 0.870392051 0.796110931 0.025106922 0.0130740462764813  
0.020280571 0.790136515 0.705675072 0.028265607 0.0175826749699646  
0.022826456 0.292449219 0.187899066 0.028080144 0.0128536002552634  
0.023325478 0.426291717 0.312563203 0.038391114 0.0470975146142256  
0.027665779 0.686041801 0.559468031 0.038576694 0.0487364234046789  
0.034741326 0.905362985 0.799155758 0.027930934 0.0241598883783852  
0.041000572 0.643191575 0.547678847 0.029014433 0.04882099252789  
0.022829655 0.783597001 0.655616852 0.038567156 0.0288454814339084  
0.027396725 0.495442976 0.377291957 0.041288296 0.0454999660806468  
0.044493910 0.718487046 0.623106057 0.032312419 0.0472587989731534  
0.022417146 0.498151873 0.400401041 0.035513276 0.02241111389106  
0.022081996 0.231676781 0.063736016 0.047525804 0.00639560439979331  
0.036798044 0.889129250 0.743263164 0.044797576 0.0300215194764539  
0.030353335 0.322450001 0.263403480 0.017996042 0.0051383069663515  
0.046574460 0.496762771 0.417547790 0.026602514 0.0382390525639072  
0.024855305 0.914403600 0.794715384 0.035108579 0.0057412785369628  
0.034524314 0.615472777 0.526901897 0.027541353 0.0214699957903696  
0.011348860 0.405264851 0.313131200 0.030080262 0.00564533533043482  
0.026524824 0.594816263 0.526693265 0.026002868 0.0110672525512063  
0.027852096 0.910662296 0.774810111 0.039316475 0.00781105510948452  
0.034040175 0.465170812 0.315960197 0.048905948 0.0452832967187147  
0.017455668 0.407834084 0.325622042 0.027114642 0.00446518505303296  
0.044855057 0.796023708 0.657247947 0.047468997 0.04736969037645  
0.039205560 0.778986907 0.624695562 0.054078820 0.0460314217871448  
0.041385171 0.870986405 0.781980236 0.028109225 0.01145240494447  
0.031798372 0.816965566 0.722724215 0.027394094 0.00502770283089389  
0.042383983 0.502460916 0.368995210 0.044820278 0.0393418135237928  
0.033832492 0.837484951 0.734341687 0.036201393 0.012575044389519  
0.038865253 0.281519511 0.166305598 0.033015543 0.0100605182937431  
0.041131112 0.682406096 0.605083832 0.029530189 0.0177978013556044  
0.020923501 0.857112706 0.728902514 0.039072103 0.00675972519338566  
0.052473120 0.547546988 0.400965708 0.044610790 0.047414730364128  
0.036632301 0.572052508 0.443888944 0.040469703 0.020347649835562  
0.038828828 0.845318596 0.731447105 0.035796316 0.0112813043782678  
0.049920116 0.8733355763 0.717887395 0.043148561 0.0240501891326704  
0.046514049 0.616250451 0.425278131 0.055820516 0.0484626765952426



0.049059921 0.678975996 0.543305906 0.039067235 0.0260237454597098  
0.030445917 0.572105683 0.420143331 0.051969080 0.0246695562156559  
0.028899967 0.339488338 0.068704549 0.076549277 0.0230913315491318  
0.028815855 0.277860956 0.072935979 0.066063833 0.0298936372683832  
0.035379707 0.571005453 0.403862974 0.057970401 0.0371426782588395  
0.034354535 0.613175264 0.522404118 0.031327929 0.00730440546707238  
0.024569620 0.308074416 0.175105830 0.043388666 0.00330832710830921  
0.029105970 0.876879458 0.753224464 0.040603945 0.00388042624768213  
0.036913796 0.440254190 0.358840458 0.029786865 0.00469728191952805  
0.041296579 0.887331466 0.788595240 0.034689503 0.00532885390521587  
0.046659575 0.679896856 0.529442474 0.055210591 0.0313527493412049  
0.039624560 0.841485020 0.755583564 0.032226000 0.00396731733406187  
0.049153428 0.750550460 0.601969317 0.051329732 0.0209594575657255  
0.065421497 0.680165438 0.578421287 0.034517836 0.024958806881042  
0.031021150 0.463139307 0.284185498 0.057162805 0.0157577805864692  
0.044890839 0.905588206 0.703792223 0.067286438 0.0228281908308987  
0.060927560 0.800147901 0.595846781 0.064075248 0.0423621914682373  
0.078058669 0.951883705 0.822935962 0.042387641 0.0140860471374726  
0.020250318 0.627314990 0.500336854 0.045966013 0.00429556436140157  
0.031619646 0.820975182 0.622110247 0.057796965 0.0106943891488435  
0.053275848 0.793887908 0.590907424 0.065912930 0.0272732589138  
0.059566296 0.642725546 0.547157259 0.038152472 0.012689704542032  
0.041966708 0.393067345 0.201463297 0.059840332 0.0156719075842699  
0.043005757 0.766890057 0.575915990 0.066132940 0.0120845299570347  
0.040077017 0.904914052 0.719962907 0.068935751 0.00865643141317885  
0.069645608 0.865180409 0.764498188 0.037627032 0.00392656087478859  
0.056714564 0.533285384 0.335077280 0.069031556 0.017316106648626  
0.064884381 0.603651477 0.444647435 0.052880816 0.0097324672797686  
0.043829475 0.736163314 0.475987424 0.077910171 0.0111961284337485  
0.076252589 0.773598321 0.661948267 0.038012533 0.0036234438823891  
0.089910231 0.591892830 0.411532703 0.054596799 0.0124358456389534  
0.050477491 0.580857279 0.340273220 0.084192120 0.00380934850334658  
0.005761969 0.976914319 0.961402938 0.005634012 0.0363986815013882  
0.007246989 0.952867232 0.925326366 0.008913533 0.0321872553941352  
0.010444560 0.038549070 0.024513568 0.004863132 0.0197510957213361  
0.005452763 0.967209163 0.934626155 0.012026001 0.0367573225255921  
0.022953741 0.947810996 0.819037221 0.045456222 0.0355720903326989  
0.043471456 0.869662103 0.677469258 0.063374713 0.036816181738972  
0.068300036 0.808842161 0.535554458 0.089631191 0.0224029205588696

| <b>KEGG pathway</b>                                       | <b>p-value</b>      |
|-----------------------------------------------------------|---------------------|
| Glycosaminoglycan biosynthesis - chondroitin sulfate      | 0.000000000000000   |
| ErbB signaling pathway                                    | 0.00000000000000781 |
| mTOR signaling pathway                                    | 0.00000006746155    |
| Insulin signaling pathway                                 | 0.0000000779425     |
| TGF-beta signaling pathway                                | 0.00000268675       |
| Acute myeloid leukemia                                    | 0.00001637666       |
| Dorso-ventral axis formation                              | 0.00003311146       |
| Dopaminergic synapse                                      | 0.00004679336       |
| Neurotrophin signaling pathway                            | 0.00005811483       |
| Gap junction                                              | 0.00007844055       |
| Wnt signaling pathway                                     | 0.0001367145        |
| Transcriptional misregulation in cancer                   | 0.0003077745        |
| Endocrine and other factor-regulated calcium reabsorption | 0.0003916736        |
| Glioma                                                    | 0.0005503835        |
| PI3K-Akt signaling pathway                                | 0.0007617474        |
| Prostate cancer                                           | 0.0007926991        |
| Focal adhesion                                            | 0.0008046906        |
| MAPK signaling pathway                                    | 0.001499682         |
| Colorectal cancer                                         | 0.00183516          |
| Long-term potentiation                                    | 0.002195478         |
| Long-term depression                                      | 0.002274003         |
| Endometrial cancer                                        | 0.002487843         |
| Adherens junction                                         | 0.00264312          |
| Fc gamma R-mediated phagocytosis                          | 0.0027016           |
| Chronic myeloid leukemia                                  | 0.003697233         |
| Mucin type O-Glycan biosynthesis                          | 0.005987828         |
| GnRH signaling pathway                                    | 0.007581879         |
| Pathways in cancer                                        | 0.01260286          |
| Hepatitis B                                               | 0.01410429          |
| Glutamatergic synapse                                     | 0.01583876          |
| Regulation of actin cytoskeleton                          | 0.01789224          |
| Non-small cell lung cancer                                | 0.01850767          |
| Axon guidance                                             | 0.03099447          |
| Pancreatic cancer                                         | 0.03459055          |
| Serotonergic synapse                                      | 0.03734403          |
| Notch signaling pathway                                   | 0.03924985          |
| HTLV-I infection                                          | 0.04108313          |

**ErbB signaling pathway (hsa04012)**

|                            | <b>p value</b> |
|----------------------------|----------------|
| hsa-miR-34b-3p microT-CDS  | 0.00000079     |
| hsa-miR-34c-3p microT-CDS  | 0.00002045     |
| hsa-miR-144-3p microT-CDS  | 0.00229325     |
| hsa-miR-34b-5p microT-CDS  | 0.00308727     |
| hsa-miR-34a-5p microT-CDS  | 0.00808990     |
| hsa-miR-146b-3p microT-CDS | 0.01554508     |
| hsa-miR-146b-5p microT-CDS | 0.01784331     |
| hsa-miR-181d microT-CDS    | 0.02009958     |
| hsa-miR-451a microT-CDS    | 0.02149957     |
| hsa-miR-34c-5p microT-CDS  | 0.02552946     |
| hsa-miR-181c-5p microT-CDS | 0.02763107     |

**#genes**

**#miRNAs**

|    |    |
|----|----|
| 4  | 5  |
| 33 | 11 |
| 23 | 8  |
| 31 | 7  |
| 25 | 5  |
| 14 | 4  |
| 10 | 7  |
| 36 | 5  |
| 33 | 7  |
| 24 | 4  |
| 36 | 5  |
| 20 | 3  |
| 10 | 4  |
| 15 | 4  |
| 61 | 5  |
| 17 | 5  |
| 45 | 4  |
| 35 | 2  |
| 20 | 4  |
| 20 | 7  |
| 18 | 3  |
| 17 | 6  |
| 15 | 4  |
| 14 | 3  |
| 17 | 4  |
| 3  | 2  |
| 14 | 2  |
| 40 | 2  |
| 30 | 4  |
| 16 | 2  |
| 46 | 5  |
| 14 | 3  |
| 26 | 3  |
| 19 | 4  |
| 22 | 3  |
| 9  | 4  |
| 21 | 1  |

**# target genes**

|   | <b>Gene Name</b> | <b>Gene Ensembl id</b>                       |
|---|------------------|----------------------------------------------|
| 7 | CBLB;SOS1;G      | ENSG00000114423;ENSG00000115904;ENSG00000109 |
| 6 | GSK3B;PAK2;I     | ENSG00000082701;ENSG00000180370;ENSG0000011  |
| 9 | GSK3B;PIK3CI     | ENSG00000082701;ENSG00000051382;ENSG00000101 |
| 5 | MYC;NRG3;SI      | ENSG00000136997;ENSG00000185737;ENSG00000197 |
| 6 | ERBB2;AREGE      | ENSG00000141736;ENSG00000205595;ENSG00000051 |
| 5 | BRAF;PAK7;R      | ENSG00000157764;ENSG00000101349;ENSG00000132 |
| 4 | CAMK2D;NRA       | ENSG00000145349;ENSG00000213281;ENSG00000143 |
| 5 | CAMK2D;CRK       | ENSG00000145349;ENSG00000167193;ENSG00000117 |
| 1 | EREG             | ENSG00000124882                              |
| 3 | ERBB2;AREGE      | ENSG00000141736;ENSG00000205595;ENSG00000169 |
| 5 | CRK;PIK3R3;A     | ENSG00000167193;ENSG00000117461;ENSG00000117 |



9458;ENSG00000065559;ENSG00000177885;ENSG00000178568;ENSG00000108443  
4423;ENSG00000115904;ENSG00000109458;ENSG00000177885  
1349;ENSG00000146648;ENSG00000107643;ENSG00000109458;ENSG00000117020;ENSG000001  
7122;ENSG00000178568;ENSG00000109339  
1382;ENSG00000109321;ENSG00000166501;ENSG00000169032  
1155;ENSG00000175634;ENSG00000166501  
1322;ENSG00000178568  
1461;ENSG00000115904;ENSG00000108443

1032

17020;ENSG00000169032;ENSG00000108443





198793;ENSG00000178568
